# Supplementary material for: CmirC update 2024: a multi-omics database for clustered miRNAs
Source: Funct Integr Genomics. 2024 Aug 1;24(4):133. doi: 10.1007/s10142-024-01410-2 (PMC11291601; doi:10.1007/s10142-024-01410-2)
Supplement: Supplementary file 2 — Supplementary Material 2 [file 10142_2024_1410_MOESM2_ESM.xlsx]

## Sheet: Sheet1
CmirC update 2024: A multi-omics database for clustered miRNAs
Akshay Pramod Ware1,2, Kapaettu Satyamoorthy3, and Bobby Paul1*
1Department of Bioinformatics, Manipal School of Life Sciences, Manipal Academy of Higher Education, Manipal – 576104, Karnataka, India.
2Institute of Cardiovascular Regeneration, Johann Wolfgang Goethe University, Theodor-Stern-Kai 7, Frankfurt Am Main – 60590, Germany.
3SDM College of Medical Sciences and Hospital, Shri Dharmasthala Manjunatheshwara (SDM) University, Manjushree Nagar, Sattur, Dharwad, Karnataka, 580009, India.
*Correspondence to: bobby.paul@manipal.edu
Supplementary File 1

## Sheet: BLCA
miRNA	logFC	logCPM	LR	PValue	FDR
hsa-let-7c	-1.49497	10.0223	23.4672	1.27e-06	7.48e-06
hsa-let-7d	1.0319	9.29353	26.9391	2.1e-07	1.62e-06
hsa-let-7g	1.10635	9.29744	36.9812	1.19e-09	1.57e-08
hsa-mir-1-1	-2.49028	4.83457	65.1296	7.01e-16	4.29e-14
hsa-mir-1-2	-2.52928	4.90041	68.8515	1.06e-16	9.96e-15
hsa-mir-100	-1.14115	11.6717	18.8072	1.45e-05	6.38e-05
hsa-mir-103a-1	1.10684	13.9063	29.4756	5.66e-08	5.21e-07
hsa-mir-103a-2	1.10796	13.9079	29.6602	5.15e-08	4.8e-07
hsa-mir-105-1	4.88996	6.14091	19.8668	8.3e-06	3.79e-05
hsa-mir-105-2	4.81072	6.14722	19.8715	8.28e-06	3.79e-05
hsa-mir-106a	2.65279	4.36791	37.6171	8.61e-10	1.2e-08
hsa-mir-106b	2.05505	9.78913	61.2625	5e-15	2.34e-13
hsa-mir-107	1.2249	6.47047	34.1932	4.99e-09	5.62e-08
hsa-mir-10a	1.33948	14.7084	9.56321	0.00198516	0.00522079
hsa-mir-1179	1.5926	-0.693458	5.34408	0.0207927	0.0403803
hsa-mir-1180	2.30079	4.65388	36.667	1.4e-09	1.81e-08
hsa-mir-1224	2.90436	0.667801	8.09913	0.00442864	0.0106152
hsa-mir-1226	2.40135	1.5738	29.2648	6.31e-08	5.73e-07
hsa-mir-1227	2.26522	-0.905407	14.6313	0.000130724	0.000448607
hsa-mir-1228	1.69072	0.628426	24.7704	6.46e-07	4.15e-06
hsa-mir-1229	3.23758	0.569798	34.6948	3.86e-09	4.52e-08
hsa-mir-1234	1.12606	-1.03803	5.49713	0.0190477	0.0377999
hsa-mir-1237	1.6874	-1.05318	9.52464	0.00202732	0.0053118
hsa-mir-1246	1.72641	-1.19095	6.8318	0.0089549	0.0198418
hsa-mir-1247	-1.68517	5.89156	18.1176	2.08e-05	8.67e-05
hsa-mir-1248	1.25471	1.56858	10.6033	0.00112888	0.00314522
hsa-mir-1249	1.26196	1.39849	14.8345	0.000117372	0.000408767
hsa-mir-1250	1.86844	-0.961623	6.3609	0.0116662	0.0249838
hsa-mir-1251	4.70711	1.27748	12.8859	0.000331061	0.00104207
hsa-mir-1254-1	2.27591	-0.0721139	23.5985	1.19e-06	7.14e-06
hsa-mir-1254-2	2.80599	0.0154617	34.2181	4.93e-09	5.59e-08
hsa-mir-1255a	1.27627	-0.172054	8.81895	0.00298118	0.00751707
hsa-mir-1256	2.19142	-1.0958	19.1502	1.21e-05	5.36e-05
hsa-mir-1258	-2.07012	-0.364464	24.1497	8.91e-07	5.57e-06
hsa-mir-126	1.12048	11.1942	18.0847	2.11e-05	8.77e-05
hsa-mir-1264	-1.35741	-1.33535	6.86551	0.00878753	0.0195325
hsa-mir-1265	-1.08562	-1.3604	7.92552	0.00487424	0.0115846
hsa-mir-1266	1.55883	2.82007	13.5727	0.000229503	0.000744035
hsa-mir-1269a	2.03982	7.36635	5.4048	0.0200814	0.0393328
hsa-mir-1270	2.9716	2.03411	26.1034	3.24e-07	2.38e-06
hsa-mir-1271	1.04786	1.53418	12.2288	0.000470581	0.00144565
hsa-mir-1275	1.90359	-0.811063	8.99225	0.00271127	0.00688584
hsa-mir-1276	2.35895	-0.578375	19.9729	7.85e-06	3.61e-05
hsa-mir-1277	3.19398	1.08342	54.8051	1.33e-13	4.68e-12
hsa-mir-1278	1.72134	-1.1786	14.3755	0.000149737	0.000506441
hsa-mir-128-1	1.60596	6.59557	42.3588	7.6e-11	1.48e-09
hsa-mir-128-2	1.64307	6.12516	39.6626	3.02e-10	4.88e-09
hsa-mir-1283-1	6.48331	1.50497	18.1067	2.09e-05	8.69e-05
hsa-mir-1283-2	7.44716	2.12398	26.2148	3.05e-07	2.27e-06
hsa-mir-1284	2.16261	-0.315616	25.2615	5.01e-07	3.32e-06
hsa-mir-1285-1	1.10997	-1.27695	5.82165	0.0158301	0.0325627
hsa-mir-1286	1.6166	-1.20554	8.05519	0.00453735	0.0108388
hsa-mir-1288	1.68677	0.174838	21.4339	3.66e-06	1.83e-05
hsa-mir-1289-1	1.57456	-1.14522	8.20857	0.00416929	0.0100621
hsa-mir-1291	2.45973	0.00213627	25.4553	4.53e-07	3.05e-06
hsa-mir-1292	2.17855	0.209118	31.2251	2.3e-08	2.26e-07
hsa-mir-1293	4.16204	1.73016	21.9145	2.85e-06	1.49e-05
hsa-mir-1295a	2.48303	0.20332	15.7637	7.18e-05	0.000262274
hsa-mir-1296	1.25925	3.60211	16.8807	3.98e-05	0.000152187
hsa-mir-1298	-4.11984	-0.347717	75.9428	2.92e-18	5.87e-16
hsa-mir-1301	2.48815	3.85871	51.986	5.59e-13	1.71e-11
hsa-mir-1303	1.08911	-1.27597	6.89579	0.00863989	0.0192958
hsa-mir-1304	2.05783	1.48623	13.5741	0.000229333	0.000744035
hsa-mir-1305	2.99663	-0.702832	14.2093	0.000163557	0.000547917
hsa-mir-1306	2.16356	3.65124	41.8391	9.91e-11	1.83e-09
hsa-mir-1307	2.56776	11.1239	72.8891	1.37e-17	2.14e-15
hsa-mir-130a	1.5637	6.72377	24.6325	6.94e-07	4.44e-06
hsa-mir-130b	3.35889	6.09088	71.9505	2.21e-17	2.66e-15
hsa-mir-1323	8.94767	3.85539	22.248	2.4e-06	1.27e-05
hsa-mir-133a-1	-2.44829	4.4162	62.1086	3.25e-15	1.76e-13
hsa-mir-133a-2	-2.40846	4.27534	60.7235	6.57e-15	2.98e-13
hsa-mir-133b	-2.6396	2.77176	50.1256	1.44e-12	4.23e-11
hsa-mir-1343	2.21134	0.408272	22.4369	2.17e-06	1.18e-05
hsa-mir-135a-1	1.89279	1.42548	5.25562	0.021876	0.0419912
hsa-mir-135a-2	2.05784	1.50673	6.18777	0.0128636	0.0272167
hsa-mir-135b	4.09562	4.88437	44.4424	2.62e-11	5.67e-10
hsa-mir-137	3.26622	1.47113	9.8391	0.00170841	0.00455253
hsa-mir-138-1	3.3879	2.17218	23.8469	1.04e-06	6.35e-06
hsa-mir-138-2	3.33525	1.67196	23.9455	9.91e-07	6.06e-06
hsa-mir-139	-1.61332	5.97134	62.2054	3.09e-15	1.74e-13
hsa-mir-141	3.09455	11.3413	52.3952	4.54e-13	1.42e-11
hsa-mir-142	1.74654	10.6224	19.2075	1.17e-05	5.24e-05
hsa-mir-143	-2.12849	17.2337	81.6203	1.65e-19	4.64e-17
hsa-mir-145	-1.25848	11.5215	22.9489	1.66e-06	9.4e-06
hsa-mir-146b	1.45598	9.54785	18.1799	2.01e-05	8.46e-05
hsa-mir-147b	5.07321	1.26703	48.5349	3.24e-12	8.61e-11
hsa-mir-148b	1.85766	7.15026	78.4217	8.32e-19	1.95e-16
hsa-mir-149	2.68752	7.72461	38.0422	6.92e-10	1e-08
hsa-mir-151a	1.19166	11.7653	23.416	1.3e-06	7.65e-06
hsa-mir-153-2	1.39165	2.60206	14.8871	0.000114141	0.000398501
hsa-mir-1537	1.98027	-0.703845	14.3243	0.000153863	0.000517907
hsa-mir-15a	1.71047	7.78421	48.2301	3.79e-12	9.88e-11
hsa-mir-15b	1.49601	8.34495	38.1106	6.68e-10	9.8e-09
hsa-mir-16-1	1.49178	8.12971	42.4562	7.23e-11	1.43e-09
hsa-mir-16-2	1.52902	8.1624	44.0255	3.24e-11	6.91e-10
hsa-mir-17	2.41296	10.2766	72.957	1.33e-17	2.14e-15
hsa-mir-181a-1	1.45833	9.81433	36.5842	1.46e-09	1.87e-08
hsa-mir-181a-2	1.47922	10.787	31.4654	2.03e-08	2.03e-07
hsa-mir-181b-1	1.87357	7.64534	41.1455	1.41e-10	2.55e-09
hsa-mir-181b-2	1.81405	7.60274	38.211	6.35e-10	9.4e-09
hsa-mir-181c	1.81793	6.65565	37.125	1.11e-09	1.47e-08
hsa-mir-181d	1.65705	4.62853	25.3457	4.79e-07	3.2e-06
hsa-mir-182	2.83006	14.6162	52.7984	3.7e-13	1.18e-11
hsa-mir-183	3.57545	13.7964	67.96	1.67e-16	1.38e-14
hsa-mir-185	2.1297	6.73945	71.898	2.27e-17	2.66e-15
hsa-mir-186	1.22892	8.05369	38.8974	4.47e-10	6.76e-09
hsa-mir-187	2.51736	7.25646	16.949	3.84e-05	0.000147212
hsa-mir-188	2.74066	2.42081	51.333	7.8e-13	2.33e-11
hsa-mir-18a	3.49784	5.30145	72.6832	1.52e-17	2.14e-15
hsa-mir-18b	2.4697	0.698956	20.2078	6.95e-06	3.24e-05
hsa-mir-1908	2.04033	-1.11057	14.0941	0.000173888	0.000578395
hsa-mir-190b	1.10253	-0.732155	5.6014	0.0179461	0.0360203
hsa-mir-191	2.11269	9.81265	49.5327	1.95e-12	5.6e-11
hsa-mir-1910	3.85714	1.02593	37.2157	1.06e-09	1.43e-08
hsa-mir-1912	-4.36063	-1.12041	53.3995	2.72e-13	8.91e-12
hsa-mir-1914	2.25512	-0.867639	14.7552	0.00012241	0.000424214
hsa-mir-1915	2.72541	-0.839463	15.3621	8.88e-05	0.000316135
hsa-mir-192	3.24364	9.40285	39.9639	2.59e-10	4.23e-09
hsa-mir-193b	2.33231	7.47805	44.6013	2.42e-11	5.31e-10
hsa-mir-194-1	2.49631	7.35738	24.5279	7.32e-07	4.65e-06
hsa-mir-194-2	2.54955	7.54608	25.6458	4.1e-07	2.91e-06
hsa-mir-195	-1.16264	4.79212	34.9436	3.39e-09	4.05e-08
hsa-mir-196a-1	2.72711	5.00258	20.2362	6.84e-06	3.2e-05
hsa-mir-196a-2	2.45066	5.15178	17.491	2.89e-05	0.000115062
hsa-mir-196b	1.68914	9.10483	27.5373	1.54e-07	1.23e-06
hsa-mir-197	1.79115	8.89305	37.2701	1.03e-09	1.4e-08
hsa-mir-1976	1.22203	3.22882	27.1367	1.9e-07	1.48e-06
hsa-mir-198	1.21072	-1.26643	5.70873	0.0168808	0.0342237
hsa-mir-19a	2.80408	5.55572	66.8063	3e-16	2.11e-14
hsa-mir-19b-1	2.11005	6.88267	57.2088	3.92e-14	1.67e-12
hsa-mir-19b-2	2.14348	6.74715	57.5604	3.28e-14	1.44e-12
hsa-mir-200a	2.72378	10.8318	35.8495	2.13e-09	2.65e-08
hsa-mir-200b	2.32193	10.7064	27.3153	1.73e-07	1.37e-06
hsa-mir-200c	2.01744	14.0651	27.6482	1.46e-07	1.18e-06
hsa-mir-202	-1.13857	-0.0488222	7.33373	0.00676723	0.015558
hsa-mir-203a	1.98784	14.9705	11.5778	0.000667423	0.00199801
hsa-mir-203b	3.4925	6.08411	18.4599	1.74e-05	7.47e-05
hsa-mir-205	2.65024	13.3565	28.1608	1.12e-07	9.35e-07
hsa-mir-20a	2.6293	9.07144	64.2603	1.09e-15	6.39e-14
hsa-mir-20b	2.87366	5.46887	25.473	4.49e-07	3.05e-06
hsa-mir-21	2.21628	18.1617	124.338	7.11e-29	1e-25
hsa-mir-210	5.55615	10.1312	82.0505	1.33e-19	4.64e-17
hsa-mir-211	3.22882	-0.610541	6.45761	0.0110478	0.0238346
hsa-mir-2110	1.30538	1.40257	22.3886	2.23e-06	1.2e-05
hsa-mir-2116	1.69127	-0.0976234	20.6174	5.61e-06	2.67e-05
hsa-mir-215	5.32403	5.13135	28.3797	9.97e-08	8.45e-07
hsa-mir-216a	2.69583	1.03185	10.0105	0.00155649	0.00420343
hsa-mir-216b	3.18692	0.581033	5.17081	0.0229695	0.0438508
hsa-mir-217	2.4567	6.04598	12.8436	0.000338631	0.00106351
hsa-mir-219a-1	1.78499	2.45492	27.1483	1.88e-07	1.48e-06
hsa-mir-219a-2	1.59336	-0.952229	5.28722	0.0214825	0.0414053
hsa-mir-219b	1.75641	0.09355	21.3529	3.82e-06	1.91e-05
hsa-mir-224	3.27342	7.34411	31.8004	1.71e-08	1.73e-07
hsa-mir-2276	2.06659	-0.829753	7.83475	0.00512514	0.0121603
hsa-mir-2277	2.76458	0.494627	38.9792	4.28e-10	6.62e-09
hsa-mir-2278	2.06457	-1.11065	16.0662	6.12e-05	0.00022648
hsa-mir-2355	1.38922	6.00248	21.4519	3.63e-06	1.82e-05
hsa-mir-24-1	1.06543	10.3719	25.0818	5.49e-07	3.61e-06
hsa-mir-24-2	1.08759	10.3812	25.723	3.94e-07	2.86e-06
hsa-mir-25	1.17689	13.5241	26.4071	2.77e-07	2.08e-06
hsa-mir-2682	2.83385	-0.938449	7.7622	0.00533508	0.0125947
hsa-mir-27a	1.49227	11.0537	35.8945	2.08e-09	2.64e-08
hsa-mir-296	2.08295	3.04966	15.673	7.53e-05	0.000273035
hsa-mir-29b-1	1.1805	8.64258	18.0649	2.13e-05	8.84e-05
hsa-mir-29b-2	1.11925	8.78571	16.8645	4.01e-05	0.000153073
hsa-mir-301a	3.12574	4.66827	65.3348	6.32e-16	4.04e-14
hsa-mir-301b	4.99949	2.52906	67.1949	2.46e-16	1.82e-14
hsa-mir-3065	2.73295	5.71989	33.9299	5.71e-09	6.33e-08
hsa-mir-3074	2.44157	2.88765	25.6471	4.1e-07	2.91e-06
hsa-mir-30a	-1.33116	13.6451	38.9038	4.45e-10	6.76e-09
hsa-mir-31	3.19677	7.13561	24.526	7.33e-07	4.65e-06
hsa-mir-3115	1.34547	-0.958	5.48525	0.0191775	0.0379505
hsa-mir-3117	2.72313	0.190289	25.4656	4.5e-07	3.05e-06
hsa-mir-3124	1.46728	-1.10565	9.03408	0.00264992	0.0067422
hsa-mir-3126	1.43036	-1.02895	9.49946	0.00205532	0.00537516
hsa-mir-3127	1.41718	2.60322	17.9521	2.27e-05	9.35e-05
hsa-mir-3131	5.09773	0.174614	12.3211	0.00044787	0.00138495
hsa-mir-3136	3.26168	0.154978	31.9862	1.55e-08	1.59e-07
hsa-mir-3137	1.27273	-1.19187	6.86803	0.00877514	0.0195325
hsa-mir-3138	2.31922	-0.873779	17.7053	2.58e-05	0.000104703
hsa-mir-3139	1.34893	-1.1904	6.29674	0.012096	0.0257865
hsa-mir-3140	1.47984	-0.813286	9.59991	0.00194587	0.00513666
hsa-mir-3143	2.30726	-0.956971	21.4783	3.58e-06	1.82e-05
hsa-mir-3144	2.9687	-0.314572	18.5105	1.69e-05	7.32e-05
hsa-mir-3145	1.70228	-1.05917	12.0064	0.000530172	0.00160765
hsa-mir-3146	1.15701	-1.22211	5.03844	0.0247909	0.0467019
hsa-mir-3150a	1.48676	-0.982251	9.43182	0.00213253	0.00553592
hsa-mir-3154	-1.12286	-1.04491	5.95134	0.0147061	0.0306995
hsa-mir-3157	1.37395	-0.273987	14.5721	0.000134901	0.000460692
hsa-mir-3158-1	1.44291	-0.687224	10.377	0.00127594	0.0035201
hsa-mir-3158-2	1.51022	-0.829314	10.0247	0.00154455	0.00417919
hsa-mir-3161	2.30896	-0.891951	5.64072	0.017548	0.0353428
hsa-mir-3166	1.499	-1.11339	5.24823	0.0219691	0.0421124
hsa-mir-3170	2.82326	0.824708	32.6738	1.09e-08	1.14e-07
hsa-mir-3174	2.04709	-0.719558	18.7189	1.51e-05	6.66e-05
hsa-mir-3176	2.8523	-0.471667	22.343	2.28e-06	1.22e-05
hsa-mir-3177	1.52991	-0.891948	8.16362	0.0042739	0.0102969
hsa-mir-3178	2.24114	-1.0888	18.3931	1.8e-05	7.69e-05
hsa-mir-3182	1.15714	-1.27192	5.77968	0.0162125	0.0331879
hsa-mir-3187	2.1035	-0.0172255	14.8162	0.000118516	0.000411734
hsa-mir-3189	3.49491	0.0743755	16.4364	5.03e-05	0.000189774
hsa-mir-3190	1.70689	-0.939224	12.8968	0.00032914	0.00104067
hsa-mir-3191	1.51384	-0.67692	11.5667	0.000671442	0.00200577
hsa-mir-3192	1.93526	-1.13545	13.9205	0.000190702	0.000629855
hsa-mir-3193	1.60552	0.479228	10.5825	0.00114164	0.00317447
hsa-mir-3194	2.50265	-0.543344	21.7445	3.11e-06	1.61e-05
hsa-mir-3195	-1.331	-1.28511	10.6375	0.00110815	0.00309973
hsa-mir-3198-1	1.36113	-1.23879	9.52636	0.00202541	0.0053118
hsa-mir-3198-2	2.16135	-1.09162	15.3694	8.84e-05	0.000315705
hsa-mir-32	1.84784	5.55712	42.8621	5.87e-11	1.18e-09
hsa-mir-3200	3.60668	3.05877	35.5324	2.51e-09	3.07e-08
hsa-mir-320b-1	1.51819	1.44554	22.3273	2.3e-06	1.23e-05
hsa-mir-320b-2	1.55526	2.02318	23.9672	9.8e-07	6.02e-06
hsa-mir-323a	2.0677	3.26046	11.6936	0.000627147	0.00189355
hsa-mir-323b	2.8281	2.26553	25.4804	4.47e-07	3.05e-06
hsa-mir-324	2.40648	6.30266	48.6966	2.99e-12	8.24e-11
hsa-mir-331	2.27612	5.00262	55.5567	9.08e-14	3.36e-12
hsa-mir-335	3.45135	7.60313	41.0975	1.45e-10	2.55e-09
hsa-mir-339	2.3641	6.40072	34.153	5.09e-09	5.69e-08
hsa-mir-33a	3.40434	5.21805	61.6994	4e-15	2.03e-13
hsa-mir-33b	3.6505	2.04881	47.803	4.71e-12	1.18e-10
hsa-mir-345	3.90577	5.08374	57.0791	4.19e-14	1.7e-12
hsa-mir-346	1.86496	-1.04417	6.9573	0.00834778	0.0187326
hsa-mir-34a	1.2945	7.86992	25.5766	4.25e-07	2.95e-06
hsa-mir-34b	2.71307	1.67467	29.5354	5.49e-08	5.08e-07
hsa-mir-34c	2.36735	3.97946	29.2876	6.24e-08	5.7e-07
hsa-mir-3607	1.63036	4.42481	20.7175	5.32e-06	2.55e-05
hsa-mir-3609	1.91385	-0.816442	12.3755	0.000435001	0.00134812
hsa-mir-3610	1.55731	0.274121	17.201	3.36e-05	0.000131059
hsa-mir-3611	1.65296	-1.13045	9.47496	0.00208296	0.00542726
hsa-mir-3613	2.2626	4.04331	67.7701	1.84e-16	1.44e-14
hsa-mir-3614	2.3058	3.12439	26.7562	2.31e-07	1.76e-06
hsa-mir-3615	1.80729	2.99557	40.335	2.14e-10	3.58e-09
hsa-mir-3616	2.24565	-0.872257	9.81037	0.0017353	0.00461545
hsa-mir-3618	2.47378	-0.83507	20.3429	6.47e-06	3.04e-05
hsa-mir-3619	2.52875	-0.499898	19.6254	9.42e-06	4.28e-05
hsa-mir-362	1.16043	3.95614	16.0164	6.28e-05	0.00023129
hsa-mir-3620	1.4349	-0.582612	7.40391	0.00650824	0.0150116
hsa-mir-363	2.10472	4.43377	18.619	1.6e-05	6.97e-05
hsa-mir-3646	1.45408	-1.17373	8.14626	0.00431502	0.0103782
hsa-mir-3650	1.21661	-1.26915	5.58902	0.0180734	0.036224
hsa-mir-3651	3.55597	1.39084	32.9361	9.52e-09	1.01e-07
hsa-mir-3652	2.26764	0.296736	23.3218	1.37e-06	7.98e-06
hsa-mir-3653	1.28515	2.82024	11.6329	0.000647957	0.0019522
hsa-mir-3654	2.62442	-0.880972	16.0502	6.17e-05	0.000227797
hsa-mir-3657	1.07537	-1.27896	5.34779	0.0207485	0.0403778
hsa-mir-3659	1.55251	-1.21501	8.08309	0.00446801	0.0106913
hsa-mir-3660	3.05544	-0.859802	13.9085	0.000191933	0.000630957
hsa-mir-3662	2.18155	0.0357866	14.4699	0.000142416	0.000482842
hsa-mir-3664	2.96689	-0.367978	22.0046	2.72e-06	1.43e-05
hsa-mir-3677	1.93394	3.11241	27.612	1.48e-07	1.2e-06
hsa-mir-3679	1.5391	-0.810972	8.87765	0.00288683	0.00731639
hsa-mir-3680-1	1.09897	-0.648417	6.87956	0.0087187	0.0194409
hsa-mir-3680-2	1.22633	-0.916322	7.6221	0.00576572	0.0134981
hsa-mir-3682	1.47032	0.677184	19.6311	9.39e-06	4.28e-05
hsa-mir-3684	1.32043	-0.259221	12.6874	0.000368136	0.00115104
hsa-mir-3690-1	1.2318	0.227075	6.09945	0.0135224	0.0284396
hsa-mir-3691	2.3488	-0.169234	23.5537	1.21e-06	7.24e-06
hsa-mir-371a	5.66102	0.846908	6.03713	0.014008	0.02936
hsa-mir-371b	1.59938	-1.19821	10.7367	0.00105032	0.00297343
hsa-mir-372	7.09922	3.77077	17.4108	3.01e-05	0.00011968
hsa-mir-373	5.67533	1.21048	6.64546	0.00994087	0.0215846
hsa-mir-383	-2.11629	2.26758	13.5243	0.00023549	0.00076169
hsa-mir-3909	1.18122	-0.20069	10.0597	0.00151546	0.00412429
hsa-mir-3910-1	1.42416	-1.23307	10.3007	0.00132976	0.00364004
hsa-mir-3911	2.19882	-1.08246	15.1874	9.74e-05	0.000344532
hsa-mir-3913-1	2.6903	2.00146	35.8523	2.13e-09	2.65e-08
hsa-mir-3913-2	1.99485	1.97573	21.4594	3.61e-06	1.82e-05
hsa-mir-3917	1.12199	0.72116	8.73814	0.00311622	0.00780164
hsa-mir-3920	1.65662	-0.985138	10.7739	0.00102942	0.00293197
hsa-mir-3922	2.1137	0.434865	23.3063	1.38e-06	8e-06
hsa-mir-3928	1.97991	0.984507	28.18	1.11e-07	9.31e-07
hsa-mir-3929	2.14206	-1.11137	9.03756	0.00264489	0.00674159
hsa-mir-3934	2.4092	1.92194	43.5322	4.17e-11	8.76e-10
hsa-mir-3936	1.50046	-1.16591	7.65171	0.00567184	0.0133005
hsa-mir-3939	1.93965	-1.14133	14.9764	0.000108866	0.000381031
hsa-mir-3940	1.43717	0.497673	10.6248	0.00111582	0.00311499
hsa-mir-3941	1.60335	-0.346097	17.8222	2.43e-05	9.95e-05
hsa-mir-3942	1.46195	-0.369105	12.3139	0.000449603	0.00138726
hsa-mir-3943	2.02848	-1.05695	12.8371	0.000339814	0.00106485
hsa-mir-3944	3.81468	0.383432	34.4546	4.36e-09	4.99e-08
hsa-mir-421	1.61974	2.64675	33.6203	6.7e-09	7.31e-08
hsa-mir-423	1.56156	7.77287	45.0255	1.94e-11	4.56e-10
hsa-mir-424	1.62044	6.96438	35.2684	2.87e-09	3.45e-08
hsa-mir-425	2.61642	8.91435	61.4125	4.63e-15	2.25e-13
hsa-mir-429	3.33121	8.63897	42.9814	5.53e-11	1.13e-09
hsa-mir-4326	1.96417	3.32711	17.4011	3.03e-05	0.000119952
hsa-mir-4423	1.55561	-0.643425	5.77213	0.0162823	0.0332498
hsa-mir-4435-2	1.71028	-1.18414	9.89416	0.00165804	0.00444355
hsa-mir-4443	1.46071	0.146569	5.46065	0.0194494	0.0384345
hsa-mir-4444-2	1.26641	-0.14621	14.7384	0.000123503	0.000426952
hsa-mir-4446	3.94936	-0.0176056	30.0246	4.27e-08	4.08e-07
hsa-mir-4449	3.47064	0.595482	25.0705	5.53e-07	3.62e-06
hsa-mir-4454	2.28584	-0.541952	5.34287	0.0208072	0.0403803
hsa-mir-4461	2.33278	0.769777	19.9979	7.75e-06	3.59e-05
hsa-mir-4466	1.51516	-1.22306	9.29308	0.00230021	0.00592747
hsa-mir-4470	1.40418	-0.850446	9.12561	0.00252056	0.00643634
hsa-mir-4473	2.24633	-0.239395	15.0384	0.000105343	0.000369621
hsa-mir-4479	2.42906	-0.858235	18.5334	1.67e-05	7.25e-05
hsa-mir-4492	1.7176	-1.0061	8.23781	0.00410266	0.00991829
hsa-mir-449a	2.90125	0.673722	13.1824	0.000282594	0.00090161
hsa-mir-449b	2.93125	-0.680121	10.924	0.000949275	0.00273695
hsa-mir-4501	3.565	0.855763	9.97987	0.00158261	0.00426576
hsa-mir-450a-1	2.20601	2.72882	48.5513	3.22e-12	8.61e-11
hsa-mir-450a-2	2.05715	2.7354	41.958	9.33e-11	1.75e-09
hsa-mir-450b	1.80261	4.07736	37.8487	7.64e-10	1.1e-08
hsa-mir-4510	-2.36954	-1.30576	7.1205	0.00762077	0.0173502
hsa-mir-4515	1.29202	-1.04902	5.06389	0.0244294	0.0461991
hsa-mir-4517	1.77248	-1.08561	8.76953	0.00306304	0.00770965
hsa-mir-452	1.94793	7.77157	18.6487	1.57e-05	6.89e-05
hsa-mir-4520-1	1.39448	-1.24256	7.82225	0.00516068	0.012224
hsa-mir-4520-2	1.14476	-1.27298	5.87399	0.0153662	0.0318516
hsa-mir-4521	1.36327	0.220778	8.10733	0.00440867	0.0105853
hsa-mir-4522	1.35366	-0.972117	6.92702	0.00849032	0.0189919
hsa-mir-4523	3.90871	-0.493274	38.2803	6.13e-10	9.17e-09
hsa-mir-4525	1.829	-1.03165	10.6856	0.0010797	0.00303829
hsa-mir-454	2.17809	3.67319	68.0127	1.62e-16	1.38e-14
hsa-mir-455	2.56022	7.8306	44.8635	2.11e-11	4.82e-10
hsa-mir-4636	3.04366	1.49434	22.9268	1.68e-06	9.43e-06
hsa-mir-4638	2.93819	-0.129678	37.394	9.65e-10	1.33e-08
hsa-mir-4639	1.42471	-1.18462	6.96253	0.00832344	0.0187078
hsa-mir-4640	2.73731	-0.325674	29.1412	6.73e-08	6.03e-07
hsa-mir-4645	1.55757	-0.644058	11.0844	0.00087057	0.00252555
hsa-mir-4647	1.19224	-1.07212	5.57236	0.0182461	0.0365182
hsa-mir-4649	1.31272	-0.932785	7.21291	0.00723809	0.0165057
hsa-mir-4651	1.61274	-1.1958	10.6598	0.00109488	0.00306872
hsa-mir-4652	3.68164	1.83696	32.1332	1.44e-08	1.49e-07
hsa-mir-4653	1.49947	-1.21885	10.3344	0.00130573	0.00358821
hsa-mir-4654	1.33356	-1.24748	8.5845	0.00339036	0.00838354
hsa-mir-4657	1.86078	-0.8003	15.1531	9.91e-05	0.000349589
hsa-mir-4658	1.65703	-0.954396	7.25534	0.00706906	0.0161726
hsa-mir-4659a	1.84311	-1.14981	12.439	0.000420457	0.00130881
hsa-mir-466	2.88557	-0.135543	12.6451	0.000376553	0.00117475
hsa-mir-4660	1.06994	-0.13155	8.51958	0.00351346	0.00862729
hsa-mir-4661	1.88403	2.62547	22.8979	1.71e-06	9.53e-06
hsa-mir-4662a	1.86718	5.21287	24.8426	6.22e-07	4.03e-06
hsa-mir-4664	3.79703	0.705309	45.3451	1.65e-11	4.01e-10
hsa-mir-4665	3.29173	-0.493696	28.4136	9.8e-08	8.35e-07
hsa-mir-4666a	1.65012	-1.20458	10.8792	0.000972494	0.0027811
hsa-mir-4667	1.17383	-1.17604	5.19088	0.0227057	0.0434061
hsa-mir-4668	1.96993	1.40948	33.1747	8.42e-09	8.98e-08
hsa-mir-4669	2.14628	-1.01917	7.29527	0.00691364	0.0158428
hsa-mir-4673	1.5281	-1.21354	10.4995	0.00119407	0.00330719
hsa-mir-4674	1.24246	-0.992897	5.30568	0.021256	0.0410814
hsa-mir-4676	2.09748	-0.173347	27.5446	1.54e-07	1.23e-06
hsa-mir-4677	1.67071	3.00144	47.8243	4.66e-12	1.18e-10
hsa-mir-4680	1.20799	-0.971146	6.06764	0.0137681	0.028913
hsa-mir-4685	1.76773	-0.514224	17.0372	3.67e-05	0.000141684
hsa-mir-4686	1.31465	-1.25424	5.52702	0.018725	0.0373702
hsa-mir-4687	2.6607	-0.551844	23.809	1.06e-06	6.45e-06
hsa-mir-4689	1.01513	-1.2863	5.7444	0.0165413	0.0336324
hsa-mir-4691	2.35403	-0.617798	14.5799	0.000134341	0.000459898
hsa-mir-4695	1.0746	-1.28035	6.45536	0.0110618	0.0238346
hsa-mir-4699	1.41515	-1.18573	4.95952	0.0259475	0.0484192
hsa-mir-4700	1.451	-1.01346	8.72288	0.00314241	0.00785324
hsa-mir-4707	2.39429	-0.427036	20.1246	7.26e-06	3.37e-05
hsa-mir-4713	2.9223	-0.456284	23.6804	1.14e-06	6.87e-06
hsa-mir-4716	1.30866	-1.25916	8.74692	0.00310126	0.00777802
hsa-mir-4723	1.33906	-1.13604	7.81407	0.0051841	0.0122589
hsa-mir-4724	4.18587	1.3793	39.4365	3.39e-10	5.42e-09
hsa-mir-4725	1.60588	-0.996821	6.63209	0.0100158	0.0217137
hsa-mir-4726	1.9523	-0.464795	17.2768	3.23e-05	0.000126985
hsa-mir-4728	2.25949	2.03837	16.2862	5.45e-05	0.000204328
hsa-mir-4734	1.73328	-1.17979	12.2449	0.000466533	0.00143635
hsa-mir-4740	-1.38397	-1.16182	9.78845	0.00175611	0.00465321
hsa-mir-4742	2.00667	0.327778	30.3896	3.53e-08	3.41e-07
hsa-mir-4745	2.58869	-0.51247	15.7417	7.26e-05	0.000263964
hsa-mir-4746	2.61235	2.59152	44.8523	2.12e-11	4.82e-10
hsa-mir-4747	1.10038	-1.2753	6.6729	0.00978899	0.0212876
hsa-mir-4749	1.33352	-1.08866	7.39621	0.00653613	0.0150513
hsa-mir-4754	2.13681	-0.787286	17.703	2.58e-05	0.000104703
hsa-mir-4755	1.41892	-0.868404	9.35998	0.00221775	0.00573598
hsa-mir-4756	3.44255	-0.711234	22.5036	2.1e-06	1.15e-05
hsa-mir-4758	2.92447	-0.344412	26.7315	2.34e-07	1.77e-06
hsa-mir-4762	1.27073	-0.535012	11.7423	0.000610954	0.00184863
hsa-mir-4763	2.87668	-0.880497	28.4873	9.43e-08	8.19e-07
hsa-mir-4766	2.7557	-0.187151	24.8955	6.05e-07	3.94e-06
hsa-mir-4768	1.27293	-0.828232	7.21929	0.00721243	0.0164739
hsa-mir-4771-1	1.46497	-1.22311	9.26207	0.00233949	0.00600668
hsa-mir-4777	2.00922	-0.579092	17.0628	3.62e-05	0.000140172
hsa-mir-4778	2.50544	0.0934381	11.1317	0.000848641	0.00248241
hsa-mir-4782	1.53628	-1.20795	11.3336	0.00076117	0.00224052
hsa-mir-4784	2.00867	-0.443519	9.27021	0.00232911	0.00599097
hsa-mir-4787	2.88644	0.692949	20.7662	5.19e-06	2.51e-05
hsa-mir-4788	1.94195	-0.444284	6.78091	0.00921377	0.0203194
hsa-mir-4791	1.46799	-0.388306	9.31831	0.00226875	0.00585714
hsa-mir-4793	1.99916	-0.963245	10.0421	0.00153006	0.00415599
hsa-mir-4797	2.27758	-0.222356	23.5819	1.2e-06	7.17e-06
hsa-mir-4802	2.30643	-0.622149	21.3081	3.91e-06	1.94e-05
hsa-mir-483	5.24739	6.72922	26.2231	3.04e-07	2.27e-06
hsa-mir-484	1.61123	6.5687	37.6549	8.44e-10	1.19e-08
hsa-mir-489	3.4399	-0.574885	24.5149	7.37e-07	4.65e-06
hsa-mir-490	-1.94245	3.62612	15.8967	6.69e-05	0.000245107
hsa-mir-492	1.67821	-1.12221	9.61746	0.00192736	0.00509737
hsa-mir-498	7.43278	2.67858	15.4462	8.49e-05	0.000304681
hsa-mir-499a	2.55602	0.903595	6.99372	0.00817961	0.0184443
hsa-mir-5001	1.99222	0.179653	26.805	2.25e-07	1.72e-06
hsa-mir-5002	1.65555	-0.738505	5.75253	0.0164649	0.0335741
hsa-mir-500a	1.09266	8.21359	16.2717	5.49e-05	0.00020535
hsa-mir-500b	1.37075	2.96533	22.9272	1.68e-06	9.43e-06
hsa-mir-501	1.57689	5.93592	25.6005	4.2e-07	2.94e-06
hsa-mir-5010	1.40163	0.191243	19.559	9.75e-06	4.41e-05
hsa-mir-502	1.09024	3.57147	21.4584	3.62e-06	1.82e-05
hsa-mir-503	3.32103	3.70392	61.6821	4.04e-15	2.03e-13
hsa-mir-504	-1.8743	0.18652	31.6571	1.84e-08	1.85e-07
hsa-mir-505	1.25046	5.9764	24.0203	9.53e-07	5.88e-06
hsa-mir-506	3.36846	-0.0664021	6.26038	0.0123468	0.0262415
hsa-mir-508	2.57104	4.7332	10.7295	0.00105442	0.00297905
hsa-mir-5088	1.61028	-1.15399	9.58292	0.00196396	0.00517471
hsa-mir-509-1	3.22521	1.70244	10.6797	0.00108319	0.00304201
hsa-mir-509-2	3.23326	1.7061	11.5239	0.000687078	0.00204813
hsa-mir-509-3	2.97139	1.86587	9.91827	0.00163646	0.00440249
hsa-mir-5092	3.14208	-0.680432	24.1361	8.98e-07	5.59e-06
hsa-mir-5094	1.35746	-1.10971	6.68083	0.00974553	0.0212589
hsa-mir-511	1.1461	4.15134	8.5868	0.00338608	0.00838354
hsa-mir-512-1	8.52986	5.39637	26.1408	3.17e-07	2.35e-06
hsa-mir-512-2	9.47575	5.40305	31.3057	2.2e-08	2.18e-07
hsa-mir-513a-2	1.82821	-1.17859	5.40321	0.0200997	0.0393328
hsa-mir-513c	3.21986	-0.654843	8.61287	0.00333796	0.00828335
hsa-mir-514a-1	2.21446	1.95662	7.31663	0.00683196	0.0156812
hsa-mir-514a-2	2.28388	1.97096	7.48269	0.00622949	0.0144635
hsa-mir-514a-3	2.1364	1.94424	6.43784	0.0111714	0.024034
hsa-mir-514b	4.41921	-0.325981	9.90755	0.00164602	0.00441976
hsa-mir-515-1	8.03356	3.37173	16.3481	5.27e-05	0.000198291
hsa-mir-515-2	7.4954	3.3654	16.4622	4.96e-05	0.000187709
hsa-mir-516a-1	8.21656	5.70319	30.9036	2.71e-08	2.65e-07
hsa-mir-516a-2	9.64846	5.52197	39.3836	3.48e-10	5.5e-09
hsa-mir-516b-1	8.16958	4.0134	15.9683	6.44e-05	0.000236623
hsa-mir-516b-2	6.76014	2.26354	13.9129	0.000191478	0.000630935
hsa-mir-517a	8.29302	5.4904	20.9382	4.74e-06	2.33e-05
hsa-mir-517b	8.2797	5.47718	20.8393	4.99e-06	2.42e-05
hsa-mir-517c	8.36452	3.28769	17.6495	2.66e-05	0.00010672
hsa-mir-518a-1	8.27759	4.24615	17.6627	2.64e-05	0.00010633
hsa-mir-518a-2	9.20927	4.43152	22.881	1.72e-06	9.55e-06
hsa-mir-518b	9.05132	5.71366	25.4955	4.43e-07	3.05e-06
hsa-mir-518c	9.09534	5.32378	25.4625	4.51e-07	3.05e-06
hsa-mir-518e	8.39665	5.10729	20.9095	4.82e-06	2.34e-05
hsa-mir-518f	10.0387	5.19123	25.6961	4e-07	2.88e-06
hsa-mir-519a-1	10.3054	6.15715	41.1049	1.44e-10	2.55e-09
hsa-mir-519a-2	8.86761	5.67716	31.8002	1.71e-08	1.73e-07
hsa-mir-519b	7.92036	2.56089	16.962	3.81e-05	0.000146604
hsa-mir-519c	8.56664	3.17915	21.1546	4.24e-06	2.08e-05
hsa-mir-519d	8.18588	4.18864	17.7678	2.5e-05	0.000102075
hsa-mir-519e	6.84659	1.5776	13.2549	0.00027187	0.000869368
hsa-mir-520a	9.62931	6.22027	28.4612	9.56e-08	8.21e-07
hsa-mir-520b	9.3176	5.07759	28.7334	8.31e-08	7.34e-07
hsa-mir-520c	9.04773	3.93147	20.3442	6.47e-06	3.04e-05
hsa-mir-520d	8.74982	4.00199	18.2532	1.93e-05	8.22e-05
hsa-mir-520e	7.30278	2.42045	14.5086	0.000139519	0.000474161
hsa-mir-520f	9.27383	5.02326	23.5321	1.23e-06	7.26e-06
hsa-mir-520g	8.85883	4.21416	21.2133	4.11e-06	2.03e-05
hsa-mir-520h	8.12388	3.28563	17.6829	2.61e-05	0.000105509
hsa-mir-521-1	7.83559	3.00618	17.2565	3.27e-05	0.00012764
hsa-mir-521-2	5.80145	0.945144	15.7552	7.21e-05	0.000262768
hsa-mir-522	8.56147	5.03769	28.7112	8.4e-08	7.34e-07
hsa-mir-523	7.7706	2.77078	13.3142	0.000263402	0.000846134
hsa-mir-524	7.87778	2.52289	17.9102	2.32e-05	9.53e-05
hsa-mir-525	8.96509	5.41391	23.26	1.42e-06	8.06e-06
hsa-mir-526a-1	3.51331	-0.697413	5.49964	0.0190204	0.0377991
hsa-mir-526b	9.01451	6.41563	28.713	8.39e-08	7.34e-07
hsa-mir-527	8.19275	4.23328	19.9757	7.84e-06	3.61e-05
hsa-mir-532	1.19201	9.7928	22.8912	1.71e-06	9.53e-06
hsa-mir-542	1.16261	8.26984	23.2912	1.39e-06	8e-06
hsa-mir-544b	1.62469	-1.20955	6.95125	0.00837607	0.0187661
hsa-mir-545	2.24484	-0.00849505	28.4588	9.57e-08	8.21e-07
hsa-mir-548at	1.20618	-1.26559	7.95541	0.00479438	0.011414
hsa-mir-548au	2.32422	-0.521344	22.7983	1.8e-06	9.93e-06
hsa-mir-548ay	1.31117	-1.19884	6.70773	0.00959959	0.0210261
hsa-mir-548az	1.44355	-1.23828	4.97682	0.0256891	0.0480008
hsa-mir-548b	1.21783	0.539428	6.1552	0.0131026	0.0276392
hsa-mir-548ba	-1.68928	-0.85246	17.7615	2.5e-05	0.000102117
hsa-mir-548d-1	2.85137	-0.780292	25.6894	4.01e-07	2.88e-06
hsa-mir-548d-2	2.11743	-0.847775	15.5146	8.19e-05	0.000294605
hsa-mir-548e	1.64429	-0.0892846	18.8668	1.4e-05	6.2e-05
hsa-mir-548f-1	3.06961	0.524876	8.35215	0.00385232	0.00937752
hsa-mir-548j	1.93268	-0.0135782	21.927	2.83e-06	1.49e-05
hsa-mir-548k	2.21701	-0.675024	20.6364	5.55e-06	2.65e-05
hsa-mir-548l	1.3669	-1.04309	7.66328	0.00563558	0.0132596
hsa-mir-548n	1.10714	-1.2182	5.12329	0.0236068	0.0449456
hsa-mir-548o	1.99182	-0.441632	26.8422	2.21e-07	1.7e-06
hsa-mir-548o-2	1.87363	-0.381907	23.3185	1.37e-06	7.98e-06
hsa-mir-548s	1.80981	-0.728662	12.8918	0.000330018	0.00104111
hsa-mir-548t	1.03641	-0.927748	5.25965	0.0218254	0.0419514
hsa-mir-548v	2.04668	0.339936	18.5688	1.64e-05	7.14e-05
hsa-mir-548x	2.93442	-0.597779	6.03528	0.0140227	0.02936
hsa-mir-548y	4.05064	-0.44146	15.1853	9.75e-05	0.000344532
hsa-mir-549a	2.39008	-0.533254	16.2261	5.62e-05	0.000209793
hsa-mir-550a-1	2.46367	1.5745	45.5909	1.46e-11	3.6e-10
hsa-mir-550a-2	2.02285	1.56444	35.3134	2.81e-09	3.4e-08
hsa-mir-550a-3	1.86562	0.627432	25.6272	4.14e-07	2.93e-06
hsa-mir-550b-2	1.36392	-1.24685	5.7244	0.0167307	0.0339684
hsa-mir-551a	2.41966	-0.352667	11.4004	0.000734282	0.00217045
hsa-mir-551b	3.2049	3.25651	18.3269	1.86e-05	7.93e-05
hsa-mir-556	2.95039	0.32407	27.9402	1.25e-07	1.04e-06
hsa-mir-5579	2.80404	-0.219602	14.3628	0.000150755	0.000508661
hsa-mir-5581	1.84724	-0.518163	18.4872	1.71e-05	7.38e-05
hsa-mir-5582	2.05181	-0.945635	13.1264	0.00029116	0.000924745
hsa-mir-5588	1.30249	-1.01605	5.63969	0.0175584	0.0353428
hsa-mir-559	2.40362	-1.04547	17.0747	3.59e-05	0.000139682
hsa-mir-5680	-1.25773	-1.01217	13.1632	0.000285495	0.000908803
hsa-mir-5682	4.26062	-0.298753	5.74557	0.0165303	0.0336324
hsa-mir-5683	-1.29856	1.9408	8.39816	0.00375601	0.00917484
hsa-mir-5684	2.02988	0.313932	19.1748	1.19e-05	5.31e-05
hsa-mir-5687	1.04481	-0.16896	5.03816	0.0247948	0.0467019
hsa-mir-5695	1.92076	-1.09267	9.86222	0.00168708	0.00450421
hsa-mir-5699	2.61763	0.704206	34.6128	4.02e-09	4.68e-08
hsa-mir-570	2.73947	0.429332	33.4989	7.13e-09	7.66e-08
hsa-mir-5706	2.16214	-0.582783	20.465	6.07e-06	2.87e-05
hsa-mir-573	2.92589	-0.893604	17.6449	2.66e-05	0.00010672
hsa-mir-576	2.0005	3.74299	57.0544	4.24e-14	1.7e-12
hsa-mir-577	4.44372	2.42357	17.0056	3.73e-05	0.000143665
hsa-mir-578	1.17661	-1.27503	6.70599	0.00960895	0.0210261
hsa-mir-579	3.06801	0.197406	37.1644	1.09e-09	1.45e-08
hsa-mir-580	1.98789	0.220577	25.1604	5.28e-07	3.48e-06
hsa-mir-581	1.84802	-0.402229	13.8393	0.00019913	0.000653091
hsa-mir-584	2.8738	8.64835	40.4202	2.05e-10	3.5e-09
hsa-mir-589	1.75261	6.39844	42.1601	8.41e-11	1.62e-09
hsa-mir-590	2.48515	4.75911	69.0301	9.7e-17	9.75e-15
hsa-mir-592	1.3648	2.57364	6.79962	0.00911775	0.0201392
hsa-mir-597	2.3697	-1.04056	19.249	1.15e-05	5.16e-05
hsa-mir-598	1.11587	5.41	8.66493	0.00324392	0.00807822
hsa-mir-600	1.49653	-1.0242	7.01695	0.00807417	0.0182936
hsa-mir-612	2.77872	-0.828656	10.7087	0.00106632	0.00300663
hsa-mir-6125	1.13017	-0.572119	7.58252	0.00589368	0.0137292
hsa-mir-614	1.57234	-1.2137	9.14188	0.00249824	0.00640259
hsa-mir-615	4.64879	1.40805	33.6566	6.58e-09	7.23e-08
hsa-mir-616	2.50141	1.38871	40.2017	2.29e-10	3.79e-09
hsa-mir-618	1.26315	0.669546	8.391	0.00377083	0.00919507
hsa-mir-622	1.27663	-1.26028	5.19474	0.0226554	0.0433689
hsa-mir-624	1.36759	1.14154	24.2677	8.38e-07	5.27e-06
hsa-mir-627	1.98613	1.20223	36.758	1.34e-09	1.74e-08
hsa-mir-628	1.00336	2.89942	21.8711	2.92e-06	1.51e-05
hsa-mir-629	1.7882	6.85178	44.6455	2.36e-11	5.27e-10
hsa-mir-632	1.60914	-0.409053	12.9807	0.000314716	0.000997309
hsa-mir-636	2.8055	-0.245064	32.1677	1.41e-08	1.47e-07
hsa-mir-639	2.16794	-0.0957893	22.2259	2.42e-06	1.28e-05
hsa-mir-641	2.50502	-0.574455	22.4643	2.14e-06	1.16e-05
hsa-mir-642a	2.10798	1.2245	21.6356	3.3e-06	1.69e-05
hsa-mir-643	2.03371	0.285781	29.9511	4.43e-08	4.21e-07
hsa-mir-6499	2.71852	2.0573	13.7775	0.000205783	0.000673341
hsa-mir-6501	1.99417	-0.22551	19.2208	1.16e-05	5.22e-05
hsa-mir-6507	-1.80308	-0.215688	19.5417	9.84e-06	4.44e-05
hsa-mir-6508	1.17645	-1.15661	5.86392	0.0154543	0.0319768
hsa-mir-6509	1.39208	0.944859	17.2678	3.25e-05	0.000127232
hsa-mir-651	2.42594	2.27834	49.3014	2.2e-12	6.18e-11
hsa-mir-6512	-1.24677	-1.08252	6.20448	0.0127427	0.0270422
hsa-mir-6514	1.77056	-0.187514	25.3427	4.8e-07	3.2e-06
hsa-mir-6515	1.06645	-0.957964	5.34907	0.0207333	0.0403778
hsa-mir-6516	1.87431	0.159991	23.5315	1.23e-06	7.26e-06
hsa-mir-652	1.9112	5.0443	43.353	4.57e-11	9.46e-10
hsa-mir-653	2.33947	3.12823	24.8102	6.33e-07	4.08e-06
hsa-mir-658	2.28354	-0.636233	17.3427	3.12e-05	0.000123348
hsa-mir-659	1.46344	0.817215	24.0726	9.28e-07	5.75e-06
hsa-mir-660	1.24001	5.94115	22.4931	2.11e-06	1.15e-05
hsa-mir-671	2.70773	3.59227	90.9302	1.49e-21	1.05e-18
hsa-mir-6715a	3.41062	0.499653	8.87489	0.0028912	0.00731639
hsa-mir-6715b	5.2498	0.790786	16.7852	4.19e-05	0.000159174
hsa-mir-6718	2.10778	2.24197	7.53825	0.00604025	0.0140473
hsa-mir-6720	1.75196	2.96689	8.68595	0.00320672	0.00799975
hsa-mir-6721	1.16222	-1.21133	5.77796	0.0162283	0.0331879
hsa-mir-6726	1.29819	-0.906628	6.75703	0.0093379	0.0205609
hsa-mir-6728	3.48377	-0.53759	29.8722	4.61e-08	4.36e-07
hsa-mir-6729	1.13444	-1.2248	5.82927	0.0157617	0.0324695
hsa-mir-6732	1.60286	-1.20538	11.5112	0.000691798	0.00205784
hsa-mir-6734	1.53211	-0.452316	12.1622	0.000487687	0.00148845
hsa-mir-6735	2.01425	-0.781427	14.6831	0.000127184	0.000437524
hsa-mir-6736	1.99759	-1.04474	14.6857	0.000127008	0.000437524
hsa-mir-6738	1.04678	-1.24003	5.09375	0.0240122	0.0456556
hsa-mir-6740	1.37418	-1.19466	8.49022	0.00357061	0.00875236
hsa-mir-6741	1.15181	-1.06859	5.81564	0.0158842	0.0325789
hsa-mir-6742	2.21522	-1.07566	21.6841	3.21e-06	1.65e-05
hsa-mir-6743	1.13808	-1.11388	5.43101	0.0197823	0.0388196
hsa-mir-6747	1.47652	-0.749166	11.1113	0.000858056	0.00249955
hsa-mir-6748	2.02017	-0.830313	14.3072	0.000155269	0.000521394
hsa-mir-6749	1.10674	-1.22896	5.54689	0.0185136	0.0370008
hsa-mir-675	4.21463	8.33447	25.5719	4.26e-07	2.95e-06
hsa-mir-6750	1.24516	-1.06876	5.70289	0.016937	0.0342882
hsa-mir-6753	1.30576	-1.24621	7.01186	0.00809713	0.0183162
hsa-mir-6754	2.77777	-0.915242	25.9369	3.53e-07	2.59e-06
hsa-mir-6755	1.16002	0.621773	16.7375	4.29e-05	0.00016279
hsa-mir-6762	1.75209	-1.02768	11.5855	0.000664694	0.00199408
hsa-mir-6763	1.28029	-1.05791	5.81593	0.0158817	0.0325789
hsa-mir-6764	2.02131	-0.693769	18.1538	2.04e-05	8.53e-05
hsa-mir-6769a	1.91242	-1.14358	13.6517	0.00022004	0.000718319
hsa-mir-6769b	1.12808	-1.27364	6.80029	0.00911432	0.0201392
hsa-mir-6772	1.35345	-1.11486	6.71943	0.0095368	0.0209661
hsa-mir-6773	2.15939	-0.837815	12.3966	0.000430123	0.00133595
hsa-mir-6775	1.10288	-1.27387	6.30461	0.0120424	0.0257112
hsa-mir-6776	1.58549	-1.20565	8.61281	0.00333807	0.00828335
hsa-mir-6777	2.92208	-0.26128	27.7034	1.41e-07	1.16e-06
hsa-mir-6779	1.48323	-1.07337	9.47681	0.00208085	0.00542726
hsa-mir-6780b	1.55218	-1.15497	6.53303	0.010589	0.0228858
hsa-mir-6781	2.54513	-0.447931	25.744	3.9e-07	2.84e-06
hsa-mir-6783	3.49986	0.0789978	42.1188	8.59e-11	1.63e-09
hsa-mir-6785	1.20047	-1.20546	6.17042	0.0129904	0.0274437
hsa-mir-6786	1.7941	-1.17783	13.4447	0.000245699	0.000792887
hsa-mir-6787	1.80501	-1.17443	13.4111	0.000250138	0.000805363
hsa-mir-6789	1.24363	-1.26158	7.95632	0.00479198	0.011414
hsa-mir-6793	2.58594	-0.453956	27.0717	1.96e-07	1.52e-06
hsa-mir-6796	1.63681	-1.1969	10.3516	0.00129361	0.00356185
hsa-mir-6797	2.5588	-0.693814	22.6885	1.91e-06	1.05e-05
hsa-mir-6798	1.80896	-0.396363	17.3036	3.19e-05	0.00012556
hsa-mir-6801	1.45325	-1.18197	7.59885	0.00584054	0.0136279
hsa-mir-6802	1.27614	-0.276849	13.286	0.000267391	0.000856992
hsa-mir-6803	1.19141	-0.463694	10.8943	0.000964598	0.00276413
hsa-mir-6807	2.0437	-0.652639	15.6332	7.69e-05	0.000278111
hsa-mir-6808	1.6474	-0.339429	15.4312	8.56e-05	0.000306331
hsa-mir-6809	-1.02948	-1.30589	6.67294	0.00978877	0.0212876
hsa-mir-6810	1.47378	-0.953263	8.4833	0.00358421	0.00877042
hsa-mir-6812	1.41265	-1.17736	7.68864	0.00555694	0.0130965
hsa-mir-6814	3.15009	-0.535061	27.8327	1.32e-07	1.09e-06
hsa-mir-6817	1.46911	-1.22925	10.0275	0.00154218	0.00417919
hsa-mir-6818	2.09375	-0.740726	18.4041	1.79e-05	7.66e-05
hsa-mir-6819	1.21097	-1.25724	8.29125	0.00398365	0.00964716
hsa-mir-6820	2.25395	-0.314865	27.2495	1.79e-07	1.41e-06
hsa-mir-6821	1.70361	-1.09052	8.33588	0.00388697	0.00942925
hsa-mir-6822	1.18299	-1.26974	8.34104	0.00387595	0.00941876
hsa-mir-6823	1.1465	-1.27381	7.60996	0.00580466	0.0135667
hsa-mir-6825	1.39858	-1.09442	7.06197	0.00787373	0.0178971
hsa-mir-6826	1.57254	-1.20561	10.9983	0.000911955	0.00263475
hsa-mir-6827	1.12717	-1.23692	5.08762	0.0240972	0.0457555
hsa-mir-6836	1.08832	-1.27691	6.85661	0.0088314	0.019599
hsa-mir-6839	1.26821	-1.06412	5.64832	0.0174721	0.0352701
hsa-mir-6842	1.40731	1.66683	18.1869	2e-05	8.46e-05
hsa-mir-6844	2.94874	-0.556341	20.5272	5.88e-06	2.79e-05
hsa-mir-6847	1.25801	-1.15556	5.84567	0.0156154	0.0322154
hsa-mir-6850	2.18993	-1.08774	13.6321	0.000222347	0.000724171
hsa-mir-6852	1.00269	-0.437358	8.56655	0.00342396	0.00844347
hsa-mir-6853	1.11742	-1.17291	5.28892	0.0214615	0.0414053
hsa-mir-6854	1.9576	1.31027	34.5218	4.22e-09	4.86e-08
hsa-mir-6855	1.35717	-0.956474	9.4582	0.00210207	0.00546694
hsa-mir-6858	2.5409	-0.996882	21.8693	2.92e-06	1.51e-05
hsa-mir-6860	1.50273	-1.15695	4.99229	0.0254605	0.0476369
hsa-mir-6862-1	1.08603	-1.27503	6.99364	0.00818001	0.0184443
hsa-mir-6867	1.43034	-1.23101	9.42093	0.00214522	0.00555861
hsa-mir-6868	2.42102	-0.167789	18.2196	1.97e-05	8.34e-05
hsa-mir-6870	2.28939	-1.06128	17.4923	2.88e-05	0.000115062
hsa-mir-6875	1.37267	-0.444879	11.1514	0.000839689	0.00246134
hsa-mir-6877	1.48606	-0.260852	13.9897	0.000183818	0.000608547
hsa-mir-6879	1.51556	-0.899447	9.86737	0.00168236	0.00450015
hsa-mir-6881	1.34007	-1.14564	5.06453	0.0244203	0.0461991
hsa-mir-6882	1.58129	-0.940796	11.4961	0.000697416	0.00207018
hsa-mir-6885	2.10317	-0.946341	16.1816	5.76e-05	0.000213655
hsa-mir-6886	1.36258	-1.23714	8.56515	0.0034266	0.00844347
hsa-mir-6887	1.98071	-0.771551	9.80003	0.00174509	0.00463271
hsa-mir-6888	1.30451	-1.18612	6.69456	0.00967077	0.0211285
hsa-mir-6890	1.02745	-1.28357	5.90021	0.0151391	0.0315566
hsa-mir-6891	2.20064	-0.572729	11.591	0.000662725	0.00199242
hsa-mir-6894	1.85932	-0.953142	14.5373	0.000137409	0.000468123
hsa-mir-6895	1.85882	-0.976185	10.117	0.00146905	0.0040135
hsa-mir-7-1	1.63816	4.8949	29.1904	6.56e-08	5.92e-07
hsa-mir-7-2	2.54935	0.844532	23.2942	1.39e-06	8e-06
hsa-mir-7-3	2.80257	0.832941	23.0558	1.57e-06	8.93e-06
hsa-mir-708	2.65586	7.38709	40.4052	2.06e-10	3.5e-09
hsa-mir-7110	1.11694	-0.90715	6.28288	0.012191	0.0259497
hsa-mir-7111	1.45228	-1.22705	10.9005	0.000961408	0.00276061
hsa-mir-7112	3.65413	-0.604594	35.7188	2.28e-09	2.81e-08
hsa-mir-7113	1.40542	-1.07934	7.65361	0.00566588	0.0133005
hsa-mir-7114	1.2884	-1.25612	7.45154	0.00633821	0.0146434
hsa-mir-7155	1.56421	-0.929502	10.4656	0.00121619	0.00336185
hsa-mir-744	1.94269	5.5898	37.6887	8.3e-10	1.18e-08
hsa-mir-760	2.52738	1.51459	25.6115	4.18e-07	2.94e-06
hsa-mir-7641-1	2.43448	-0.329478	5.88589	0.0152627	0.0317203
hsa-mir-766	1.35923	3.12139	20.9264	4.77e-06	2.33e-05
hsa-mir-767	5.4431	6.69613	23.2789	1.4e-06	8.01e-06
hsa-mir-769	1.83412	5.16798	45.1746	1.8e-11	4.3e-10
hsa-mir-7705	4.40954	1.81104	71.1833	3.26e-17	3.52e-15
hsa-mir-7706	2.41384	1.95683	40.8615	1.63e-10	2.84e-09
hsa-mir-7851	1.45284	-1.22454	8.76275	0.00307446	0.00772458
hsa-mir-7854	2.39695	0.063395	33.5046	7.11e-09	7.66e-08
hsa-mir-7974	3.76813	-0.182871	30.6392	3.11e-08	3.02e-07
hsa-mir-7976	1.20453	-0.7307	5.49416	0.0190801	0.0378108
hsa-mir-8072	2.39031	-0.84509	21.2406	4.05e-06	2.01e-05
hsa-mir-873	2.31374	0.118766	6.02667	0.0140913	0.0294598
hsa-mir-874	1.62631	5.10559	28.8295	7.9e-08	7.04e-07
hsa-mir-877	3.25324	2.44987	56.7834	4.87e-14	1.9e-12
hsa-mir-9-1	2.16419	9.40805	14.1458	0.000169176	0.000564053
hsa-mir-9-2	2.16457	9.40828	14.1697	0.000167042	0.000558263
hsa-mir-9-3	2.15347	9.41007	14.0313	0.000179797	0.000596637
hsa-mir-92a-1	1.85011	12.9195	55.3149	1.03e-13	3.7e-12
hsa-mir-92a-2	1.85232	12.8142	55.9534	7.42e-14	2.82e-12
hsa-mir-92b	1.4475	6.55514	21.5354	3.47e-06	1.77e-05
hsa-mir-93	2.6532	13.3239	66.2697	3.93e-16	2.63e-14
hsa-mir-934	3.55096	6.23905	27.7059	1.41e-07	1.16e-06
hsa-mir-935	3.03813	1.5914	12.0604	0.000515049	0.00156856
hsa-mir-937	3.30381	2.09195	53.4076	2.71e-13	8.91e-12
hsa-mir-939	2.40743	0.667343	39.3038	3.63e-10	5.67e-09
hsa-mir-940	3.44439	3.04481	53.6095	2.45e-13	8.39e-12
hsa-mir-942	2.08028	3.40865	41.5473	1.15e-10	2.1e-09
hsa-mir-943	1.88202	-1.00792	10.3095	0.00132347	0.00362986
hsa-mir-944	2.55589	6.41352	21.8843	2.9e-06	1.51e-05
hsa-mir-96	4.29787	5.35443	82.3207	1.16e-19	4.64e-17
hsa-mir-98	1.17224	6.37346	29.8597	4.64e-08	4.36e-07
hsa-mir-99a	-1.44962	8.095	20.7319	5.28e-06	2.54e-05

## Sheet: BRCA
miRNA	logFC	logCPM	LR	PValue	FDR
hsa-let-7c	-1.72803	11.5225	372.632	5.00083e-83	3.04833e-81
hsa-mir-1-1	-5.46375	4.61884	1087.5	1.7166e-238	3.4381e-236
hsa-mir-1-2	-5.47381	4.70951	1165.71	1.7254e-255	4.0317e-253
hsa-mir-100	-1.83144	11.8528	459.477	6.2489e-102	4.3805e-100
hsa-mir-105-1	6.04045	4.12072	70.2736	5.1624e-17	4.23257e-16
hsa-mir-105-2	6.01778	4.13654	62.4988	2.6661e-15	1.957e-14
hsa-mir-106a	1.17797	4.62702	55.8447	7.84296e-14	5.2113e-13
hsa-mir-10b	-1.92502	16.4139	646.373	1.3737e-142	1.9259e-140
hsa-mir-122	2.9399	-0.0390005	12.3652	0.000437414	0.0010951
hsa-mir-1224	2.1791	1.20317	41.1855	1.38446e-10	7.40847e-10
hsa-mir-1229	1.093	0.544943	22.3039	2.32736e-06	7.95842e-06
hsa-mir-124-1	2.82207	-0.236092	12.5807	0.000389742	0.000982766
hsa-mir-124-2	2.39739	-0.249106	8.13563	0.00434037	0.00905535
hsa-mir-124-3	2.50906	-0.243176	8.94107	0.0027883	0.00599569
hsa-mir-1247	-1.55368	5.53116	102.463	4.39539e-24	5.22232e-23
hsa-mir-1250	1.702	-0.451164	25.9143	3.56921e-07	1.34879e-06
hsa-mir-1251	3.16223	1.49872	34.7597	3.73018e-09	1.74907e-08
hsa-mir-1254-1	1.1487	0.0681038	27.7978	1.34677e-07	5.37939e-07
hsa-mir-1254-2	1.85339	0.108641	63.4377	1.65517e-15	1.2278e-14
hsa-mir-1258	-2.26728	1.15342	259.781	1.91506e-58	7.25651e-57
hsa-mir-125b-1	-1.87661	8.80885	488.696	2.7388e-108	2.5598e-106
hsa-mir-125b-2	-1.86044	8.87421	482.905	4.9842e-107	4.1105e-105
hsa-mir-1262	-1.29862	0.431566	104.233	1.79898e-24	2.27223e-23
hsa-mir-1269a	6.39575	6.50239	78.4758	8.09853e-19	7.421e-18
hsa-mir-1269b	6.2672	3.60905	38.5007	5.47331e-10	2.80058e-09
hsa-mir-1276	1.51603	-0.375354	30.0042	4.31103e-08	1.83153e-07
hsa-mir-1277	1.80709	0.9621	95.2066	1.7152e-22	1.89348e-21
hsa-mir-1283-1	1.97404	-0.426947	7.59689	0.0058469	0.0118288
hsa-mir-1283-2	2.55375	-0.278011	12.9884	0.000313435	0.000800429
hsa-mir-1284	1.29213	-0.0686161	40.4196	2.04878e-10	1.07985e-09
hsa-mir-1292	1.21409	0.149467	42.1849	8.30369e-11	4.54757e-10
hsa-mir-1293	1.48301	-0.40985	17.128	3.49425e-05	0.000104902
hsa-mir-1295a	-1.18262	0.882718	64.0713	1.19996e-15	9.14317e-15
hsa-mir-1295b	1.73764	-0.294799	11.3269	0.000763919	0.00182145
hsa-mir-1301	1.96771	4.17547	200.635	1.51832e-45	4.95044e-44
hsa-mir-1305	1.01853	-0.434253	11.8127	0.000588268	0.00143435
hsa-mir-1307	1.16525	10.3872	103.428	2.69991e-24	3.32042e-23
hsa-mir-130b	1.56955	4.80365	136.049	1.94627e-31	3.7379e-30
hsa-mir-133a-1	-6.21604	4.26987	1610.33	0	0
hsa-mir-133a-2	-6.17979	4.07938	1641.72	0	0
hsa-mir-133b	-6.29235	2.95733	562.097	2.9414e-124	3.4366e-122
hsa-mir-135a-1	1.10417	2.20536	9.07983	0.00258444	0.00557443
hsa-mir-135b	2.62248	4.79928	67.0731	2.61624e-16	2.0723e-15
hsa-mir-137	2.74237	0.340481	33.371	7.61514e-09	3.44401e-08
hsa-mir-138-1	1.17331	0.543466	13.402	0.000251351	0.000648977
hsa-mir-138-2	1.3842	0.25528	21.5613	3.42701e-06	1.13855e-05
hsa-mir-139	-3.0441	6.36779	1377.42	1.6937e-301	4.7491e-299
hsa-mir-140	-1.07749	9.67867	154.085	2.21847e-35	5.18381e-34
hsa-mir-141	2.24244	10.9386	316.802	7.20284e-71	3.74014e-69
hsa-mir-142	1.90256	11.5154	129.588	5.04227e-30	8.51718e-29
hsa-mir-143	-1.17608	15.5367	152.649	4.57155e-35	1.05071e-33
hsa-mir-144	-2.9563	6.75369	531.787	1.1537e-117	1.2442e-115
hsa-mir-145	-2.29661	10.9368	806.439	2.1479e-177	3.7641e-175
hsa-mir-147b	2.54175	0.816381	115.432	6.32878e-27	8.7851e-26
hsa-mir-148b	1.27266	7.76476	165.954	5.66194e-38	1.41751e-36
hsa-mir-149	1.16745	7.47886	43.5845	4.06049e-11	2.28627e-10
hsa-mir-153-1	1.13462	1.74592	20.3796	6.35022e-06	2.0373e-05
hsa-mir-153-2	1.12666	5.73179	27.1368	1.89552e-07	7.44404e-07
hsa-mir-1537	1.13051	-0.264868	22.2947	2.33857e-06	7.9773e-06
hsa-mir-155	1.55069	8.82728	121.121	3.59472e-28	5.53824e-27
hsa-mir-17	1.14157	9.48859	72.1337	2.01095e-17	1.6984e-16
hsa-mir-181b-1	1.41398	7.76671	150.992	1.05246e-34	2.37991e-33
hsa-mir-181b-2	1.34225	7.61819	129.163	6.24847e-30	1.03063e-28
hsa-mir-181d	1.0286	4.86119	54.3348	1.69081e-13	1.10257e-12
hsa-mir-182	2.3061	15.4608	374.669	1.80154e-83	1.14807e-81
hsa-mir-183	2.97169	14.0912	482.306	6.7279e-107	5.2403e-105
hsa-mir-184	4.06497	6.66553	92.9616	5.33181e-22	5.62045e-21
hsa-mir-187	3.21478	5.63833	98.6172	3.06354e-23	3.52056e-22
hsa-mir-188	1.49896	1.88442	76.7896	1.90177e-18	1.70915e-17
hsa-mir-18a	1.50503	3.91588	67.003	2.71098e-16	2.13528e-15
hsa-mir-1908	1.09976	-0.698085	17.0286	3.68203e-05	0.000109834
hsa-mir-190b	3.35215	4.42319	200.546	1.58778e-45	5.05925e-44
hsa-mir-191	1.28995	10.2414	116.019	4.70785e-27	6.66708e-26
hsa-mir-1910	1.45493	-0.0508452	26.0518	3.32384e-07	1.26288e-06
hsa-mir-1915	1.72094	-0.63758	22.0297	2.6847e-06	9.06976e-06
hsa-mir-192	1.49493	9.07366	143.441	4.70718e-33	9.7051e-32
hsa-mir-193a	-1.18339	9.01354	271.178	6.28202e-61	2.75231e-59
hsa-mir-195	-1.34982	5.81423	288.254	1.19404e-64	5.40013e-63
hsa-mir-196a-1	3.28294	8.56953	177.617	1.60629e-40	4.41573e-39
hsa-mir-196a-2	3.14261	8.78765	169.562	9.22034e-39	2.35035e-37
hsa-mir-19a	1.34028	5.10659	73.899	8.22186e-18	7.11546e-17
hsa-mir-200a	2.0948	9.90547	295.558	3.05817e-66	1.47847e-64
hsa-mir-200b	1.68513	9.52393	194.551	3.228e-44	9.62906e-43
hsa-mir-200c	1.52883	13.5211	208.85	2.44827e-47	8.17256e-46
hsa-mir-203a	2.18466	12.8387	118.619	1.26895e-27	1.8532e-26
hsa-mir-203b	2.5973	6.11265	104.118	1.90601e-24	2.38591e-23
hsa-mir-204	-2.54651	2.67225	249.716	2.99414e-56	1.10468e-54
hsa-mir-205	-1.41017	11.5216	74.9229	4.89465e-18	4.28894e-17
hsa-mir-206	-3.51252	5.6461	47.3712	5.87383e-12	3.51928e-11
hsa-mir-208b	-4.06452	-0.631452	59.5981	1.16346e-14	8.28003e-14
hsa-mir-20b	1.22131	5.51018	37.1691	1.08319e-09	5.3852e-09
hsa-mir-21	2.12131	17.8551	794.155	1.0066e-174	1.568e-172
hsa-mir-210	3.22112	9.56497	200.081	2.00479e-45	6.24603e-44
hsa-mir-211	-1.67863	-0.418457	27.9193	1.26482e-07	5.09562e-07
hsa-mir-2114	2.61833	0.762241	70.5742	4.43274e-17	3.65571e-16
hsa-mir-215	-1.16177	2.87005	94.3701	2.61713e-22	2.80092e-21
hsa-mir-219a-2	1.14042	-0.498913	14.607	0.000132421	0.000361195
hsa-mir-2276	1.38202	-0.384189	25.9383	3.5251e-07	1.33573e-06
hsa-mir-299	-1.17333	2.1655	125.771	3.4509e-29	5.37573e-28
hsa-mir-301a	2.09623	4.46254	137.23	1.0739e-31	2.09113e-30
hsa-mir-301b	3.10649	1.26675	139.291	3.80419e-32	7.51193e-31
hsa-mir-3065	2.18237	5.91742	129.22	6.06907e-30	1.01296e-28
hsa-mir-3115	1.04132	-0.663195	11.5719	0.000669552	0.00161568
hsa-mir-3117	1.61039	0.143062	46.9674	7.2178e-12	4.28786e-11
hsa-mir-3127	1.20303	3.34974	87.7559	7.40505e-21	7.46898e-20
hsa-mir-3140	1.0377	-0.511545	14.6292	0.000130869	0.000358355
hsa-mir-3145	1.06182	-0.635916	11.9175	0.000556077	0.00136297
hsa-mir-3150a	1.60832	-0.425904	34.7179	3.81114e-09	1.78107e-08
hsa-mir-3150b	1.8791	1.85119	60.0878	9.07172e-15	6.52233e-14
hsa-mir-3156-1	4.74328	0.832886	48.7897	2.84936e-12	1.73687e-11
hsa-mir-3156-2	4.12009	0.726124	37.4195	9.52662e-10	4.75314e-09
hsa-mir-3156-3	4.38538	0.411266	42.0519	8.8884e-11	4.83006e-10
hsa-mir-3159	1.169	-0.70809	11.3528	0.000753328	0.00180233
hsa-mir-3161	2.19031	-0.159432	25.2323	5.08236e-07	1.87512e-06
hsa-mir-3170	1.21578	1.55612	47.1978	6.41715e-12	3.82844e-11
hsa-mir-3174	1.96166	-0.266136	57.9252	2.72271e-14	1.8712e-13
hsa-mir-3176	2.1548	-0.319528	47.9488	4.37496e-12	2.63249e-11
hsa-mir-3177	1.06629	-0.585113	15.3774	8.80342e-05	0.000246355
hsa-mir-3178	1.2441	-0.454237	23.2116	1.45116e-06	5.11188e-06
hsa-mir-3187	1.52466	0.0454228	42.7082	6.35451e-11	3.50749e-10
hsa-mir-3194	1.24199	-0.234373	27.3899	1.66294e-07	6.58599e-07
hsa-mir-3199-1	-1.52789	-0.212239	144.437	2.8517e-33	5.96729e-32
hsa-mir-3199-2	-1.7164	0.546689	294.754	4.5797e-66	2.14025e-64
hsa-mir-32	1.36799	4.91536	164.157	1.39788e-37	3.4383e-36
hsa-mir-3200	1.62826	2.56015	62.5833	2.55405e-15	1.88462e-14
hsa-mir-326	-1.23008	3.62532	88.821	4.32213e-21	4.42309e-20
hsa-mir-329-2	-1.03211	0.0686492	38.7933	4.71153e-10	2.43748e-09
hsa-mir-331	1.03899	5.28912	77.3404	1.43893e-18	1.30154e-17
hsa-mir-335	-1.81189	7.01641	269.836	1.2323e-60	5.08144e-59
hsa-mir-337	-1.91296	5.58153	334.798	8.66681e-75	4.67341e-73
hsa-mir-33a	1.6804	4.48203	104.739	1.39346e-24	1.77602e-23
hsa-mir-33b	2.78874	3.26065	161.26	6.00357e-37	1.42661e-35
hsa-mir-340	1.05533	4.8576	133.974	5.53623e-31	1.00876e-29
hsa-mir-342	1.57787	8.99164	131.355	2.07103e-30	3.58467e-29
hsa-mir-345	1.28154	4.83291	66.2711	3.9298e-16	3.06088e-15
hsa-mir-3591	-1.1015	-0.790478	21.7477	3.10961e-06	1.04298e-05
hsa-mir-3609	2.0638	0.283383	25.7459	3.89449e-07	1.45991e-06
hsa-mir-3610	2.30125	0.777774	133.866	5.84416e-31	1.05045e-29
hsa-mir-3612	-2.14305	-0.753677	133.972	5.54027e-31	1.00876e-29
hsa-mir-3614	1.46618	2.41635	67.646	1.95653e-16	1.56746e-15
hsa-mir-3618	1.08829	-0.612527	14.1721	0.000166827	0.000450943
hsa-mir-3619	1.96813	0.0623525	56.4132	5.87344e-14	3.93998e-13
hsa-mir-3622a	-1.17921	-0.351191	29.0363	7.10329e-08	2.95514e-07
hsa-mir-3651	1.20334	1.00006	32.5714	1.14895e-08	5.11373e-08
hsa-mir-3652	1.44339	0.41346	65.6258	5.45212e-16	4.22314e-15
hsa-mir-3654	1.31837	-0.439657	20.5114	5.92761e-06	1.91046e-05
hsa-mir-3655	1.10751	-0.322879	26.5125	2.6184e-07	1.00575e-06
hsa-mir-365a	-1.37051	6.92994	268.007	3.0854e-60	1.20159e-58
hsa-mir-365b	-1.37513	6.92555	270.255	9.98344e-61	4.24145e-59
hsa-mir-3662	2.86073	0.239716	96.6896	8.10926e-23	9.09535e-22
hsa-mir-3664	2.65215	0.709441	94.9616	1.94113e-22	2.10966e-21
hsa-mir-3677	2.18694	3.82643	134.524	4.19595e-31	7.84363e-30
hsa-mir-3678	1.00068	0.396712	27.8499	1.31104e-07	5.25165e-07
hsa-mir-3690-1	1.28379	0.318639	41.9386	9.41869e-11	5.09846e-10
hsa-mir-375	2.66158	14.48	132.839	9.80385e-31	1.71812e-29
hsa-mir-376c	-1.00494	2.66639	74.4202	6.31396e-18	5.49824e-17
hsa-mir-377	-1.24352	2.06538	144.593	2.63532e-33	5.59805e-32
hsa-mir-378a	-2.07882	8.619	483.348	3.9924e-107	3.4984e-105
hsa-mir-378c	-1.83669	2.60071	360.764	1.9201e-80	1.12166e-78
hsa-mir-378d-1	-1.72609	-0.385931	105.493	9.52508e-25	1.22515e-23
hsa-mir-378d-2	-1.94071	-0.262513	177.035	2.15143e-40	5.80058e-39
hsa-mir-379	-1.18707	9.66782	146.679	9.22365e-34	1.98947e-32
hsa-mir-381	-1.29092	5.02534	185.148	3.64241e-42	1.02133e-40
hsa-mir-383	-1.29649	1.34052	15.6999	7.42262e-05	0.000211514
hsa-mir-3911	1.12777	-0.490556	13.3	0.0002654	0.000682735
hsa-mir-3923	1.81914	-0.288805	5.83747	0.0156884	0.028865
hsa-mir-3927	1.38365	-0.668214	14.5927	0.000133433	0.000363249
hsa-mir-3940	1.02521	0.792324	29.7818	4.83522e-08	2.03573e-07
hsa-mir-421	1.02631	1.78887	63.466	1.63162e-15	1.21678e-14
hsa-mir-4286	-1.13938	-0.448323	29.2302	6.42698e-08	2.68974e-07
hsa-mir-429	2.72373	7.06483	301.401	1.63172e-67	8.17027e-66
hsa-mir-432	-1.1031	3.05616	74.9739	4.76977e-18	4.23242e-17
hsa-mir-4326	1.97593	3.18685	87.1859	9.87856e-21	9.89267e-20
hsa-mir-433	-1.3013	1.0053	94.7704	2.138e-22	2.30575e-21
hsa-mir-4421	-1.33166	-0.693042	34.2262	4.90627e-09	2.26269e-08
hsa-mir-4433b	-1.57526	-0.600723	27.6807	1.43081e-07	5.69885e-07
hsa-mir-4434	1.46273	-0.490217	27.6189	1.47726e-07	5.86718e-07
hsa-mir-4442	1.22789	-0.234248	31.9041	1.61978e-08	7.09666e-08
hsa-mir-4443	1.12016	-0.131053	22.6128	1.9816e-06	6.82606e-06
hsa-mir-4444-1	1.05308	-0.0351064	31.8945	1.62777e-08	7.10946e-08
hsa-mir-4444-2	1.11298	0.328341	45.7883	1.31751e-11	7.66452e-11
hsa-mir-4446	2.6995	0.152544	68.7074	1.14213e-16	9.25588e-16
hsa-mir-4449	1.23199	0.362898	21.9069	2.86204e-06	9.64564e-06
hsa-mir-4482	1.06766	-0.57539	8.79576	0.00301932	0.00645288
hsa-mir-4491	-1.00674	-0.00434604	35.6097	2.41087e-09	1.14967e-08
hsa-mir-449a	5.7264	3.60624	98.7552	2.85725e-23	3.31063e-22
hsa-mir-449b	4.44929	1.3774	58.035	2.5749e-14	1.78713e-13
hsa-mir-449c	4.53595	0.538431	54.0331	1.97138e-13	1.27957e-12
hsa-mir-4501	3.50123	0.789141	90.8478	1.55156e-21	1.61132e-20
hsa-mir-4517	1.17967	-0.640914	13.5839	0.000228138	0.000595623
hsa-mir-4519	1.55313	-0.57616	32.1509	1.4265e-08	6.26946e-08
hsa-mir-451a	-3.33314	8.89664	632.285	1.5918e-139	2.0288e-137
hsa-mir-452	-1.65279	6.16159	120.363	5.26762e-28	8.02739e-27
hsa-mir-4522	1.18644	-0.419225	22.0603	2.64218e-06	8.94766e-06
hsa-mir-4523	1.82668	-0.432297	38.391	5.78986e-10	2.93046e-09
hsa-mir-4524a	-1.94937	-0.489908	134.969	3.35371e-31	6.35393e-30
hsa-mir-4526	1.66697	-0.576356	31.2977	2.21338e-08	9.57763e-08
hsa-mir-4529	-1.0059	-0.610529	23.4241	1.29939e-06	4.61201e-06
hsa-mir-4533	1.3189	-0.574014	7.72723	0.0054394	0.0111005
hsa-mir-454	1.51455	3.67077	140.742	1.83244e-32	3.67012e-31
hsa-mir-455	1.18539	8.19623	52.4662	4.37714e-13	2.78943e-12
hsa-mir-4632	-1.09043	-0.506493	30.3524	3.60256e-08	1.53987e-07
hsa-mir-4638	1.92027	1.04748	88.6101	4.80824e-21	4.88489e-20
hsa-mir-4640	1.83973	-0.145939	56.6465	5.2163e-14	3.53297e-13
hsa-mir-4652	3.37976	0.061842	39.3014	3.63178e-10	1.89285e-09
hsa-mir-4654	1.18389	-0.583014	15.9304	6.57161e-05	0.000189187
hsa-mir-4657	1.31178	-0.562951	25.3492	4.78341e-07	1.76948e-06
hsa-mir-4658	1.5809	-0.360668	24.7306	6.5928e-07	2.40706e-06
hsa-mir-466	1.19738	-0.584211	13.4529	0.00024463	0.00063323
hsa-mir-4664	2.93067	0.515363	102.592	4.11771e-24	4.93421e-23
hsa-mir-4665	1.3612	-0.227994	21.7626	3.08551e-06	1.03738e-05
hsa-mir-4666a	1.15581	-0.646326	18.7985	1.45284e-05	4.53649e-05
hsa-mir-4668	1.64359	2.45996	101.384	7.57856e-24	8.92869e-23
hsa-mir-4670	-1.23463	-0.702254	34.6915	3.86309e-09	1.79935e-08
hsa-mir-4675	2.33168	-0.245213	35.701	2.30047e-09	1.10077e-08
hsa-mir-4677	1.15601	3.49626	119.762	7.13386e-28	1.07545e-26
hsa-mir-4678	-2.25076	-0.686034	108.122	2.52701e-25	3.3111e-24
hsa-mir-4680	2.30921	-0.167393	71.2925	3.08012e-17	2.57043e-16
hsa-mir-4691	1.38011	-0.544247	20.7289	5.29107e-06	1.71318e-05
hsa-mir-4700	1.16543	-0.578668	16.9541	3.8294e-05	0.000113746
hsa-mir-4701	-1.16335	-0.619427	33.777	6.18064e-09	2.82256e-08
hsa-mir-4703	-1.02205	-0.744062	22.7841	1.81256e-06	6.29013e-06
hsa-mir-4713	1.25565	-0.697976	14.3007	0.000155806	0.000423333
hsa-mir-4714	1.07328	0.15239	17.048	3.64462e-05	0.000109183
hsa-mir-4724	4.25006	1.2839	141.547	1.22183e-32	2.48261e-31
hsa-mir-4726	1.91765	-0.14883	51.1721	8.46128e-13	5.27232e-12
hsa-mir-4728	1.52672	2.39782	42.3021	7.8209e-11	4.29996e-10
hsa-mir-4732	-3.86602	-0.012409	444.441	1.16943e-98	7.80734e-97
hsa-mir-4736	1.55622	-0.630278	26.7084	2.36587e-07	9.16285e-07
hsa-mir-4738	1.06415	-0.336161	23.1433	1.50364e-06	5.28347e-06
hsa-mir-4739	1.35322	-0.663531	18.4283	1.76421e-05	5.46009e-05
hsa-mir-4740	-1.22511	-0.640357	36.636	1.42377e-09	7.02863e-09
hsa-mir-4745	1.2873	-0.323564	18.7224	1.51193e-05	4.70005e-05
hsa-mir-4746	1.48627	1.86596	96.2629	1.006e-22	1.11937e-21
hsa-mir-4756	2.93721	-0.298442	56.5341	5.52334e-14	3.72295e-13
hsa-mir-4758	2.47404	-0.195514	57.639	3.14919e-14	2.14328e-13
hsa-mir-4759	-1.41135	-0.665728	45.9884	1.18958e-11	6.97818e-11
hsa-mir-4766	1.44732	0.0842075	34.2574	4.82838e-09	2.23412e-08
hsa-mir-4777	1.31035	-0.22785	38.7228	4.88468e-10	2.51776e-09
hsa-mir-4780	-1.23737	-0.450041	16.3942	5.14426e-05	0.000150255
hsa-mir-4784	2.50081	0.582581	58.982	1.59123e-14	1.11545e-13
hsa-mir-4789	1.06724	-0.623961	12.5947	0.000386842	0.000977211
hsa-mir-4790	1.05427	-0.537925	10.1676	0.00142927	0.00322679
hsa-mir-4793	1.20866	-0.652123	15.1293	0.000100393	0.000277615
hsa-mir-4802	1.78816	-0.39241	51.1988	8.34693e-13	5.22429e-12
hsa-mir-486-1	-4.64917	6.71229	1452.25	9.31389828520209e-318	3.26452134896333e-315
hsa-mir-486-2	-4.65153	6.70249	1453.88	4.11304215440733e-318	1.92216169851281e-315
hsa-mir-488	-1.18502	-0.101042	25.1458	5.31561e-07	1.95603e-06
hsa-mir-492	1.49683	-0.641807	26.7874	2.27116e-07	8.84489e-07
hsa-mir-493	1.45947	3.91007	103.508	2.59379e-24	3.21813e-23
hsa-mir-494	-1.07474	1.31779	69.9298	6.14544e-17	5.00925e-16
hsa-mir-495	-1.32998	3.23704	147.065	7.59467e-34	1.66371e-32
hsa-mir-497	-1.256	5.03097	228.246	1.43859e-51	5.17156e-50
hsa-mir-499a	-1.61136	0.0622792	92.431	6.9715e-22	7.29406e-21
hsa-mir-5001	1.00839	0.159079	32.4806	1.20386e-08	5.34119e-08
hsa-mir-5008	1.5422	-0.523228	24.223	8.57998e-07	3.09232e-06
hsa-mir-503	1.35414	4.17326	73.6352	9.3972e-18	8.08274e-17
hsa-mir-506	1.64863	-0.453243	20.392	6.30939e-06	2.02885e-05
hsa-mir-5089	1.79082	-0.424854	18.4177	1.77401e-05	5.47833e-05
hsa-mir-5092	1.5828	-0.451665	26.4686	2.67853e-07	1.02604e-06
hsa-mir-511	-1.80028	3.41423	228.042	1.59319e-51	5.58413e-50
hsa-mir-512-1	1.42306	0.49507	11.5958	0.00066101	0.00159782
hsa-mir-512-2	1.75496	0.474786	17.4519	2.94674e-05	8.90372e-05
hsa-mir-516a-1	3.05412	1.66574	28.1651	1.11397e-07	4.55332e-07
hsa-mir-516a-2	2.86437	1.57696	26.3193	2.89382e-07	1.10549e-06
hsa-mir-518a-2	1.35097	-0.149475	6.51734	0.0106828	0.0203772
hsa-mir-518e	1.44572	0.161386	7.97793	0.0047351	0.00979147
hsa-mir-5191	-1.13875	-0.771687	29.9717	4.38398e-08	1.8569e-07
hsa-mir-519a-1	3.513	3.0459	42.0968	8.68637e-11	4.73863e-10
hsa-mir-519a-2	2.65214	1.36281	24.9146	5.99283e-07	2.19372e-06
hsa-mir-519c	1.28625	-0.328737	6.55182	0.0104777	0.0200679
hsa-mir-520b	1.35364	0.399917	9.77021	0.00177362	0.00394076
hsa-mir-520e	1.75918	-0.485151	9.68859	0.00185416	0.00408731
hsa-mir-520f	1.43815	-0.146767	7.72038	0.00546009	0.0111265
hsa-mir-521-1	2.17683	-0.417844	10.2842	0.00134172	0.00305868
hsa-mir-521-2	1.43487	-0.629606	5.96857	0.0145631	0.0270609
hsa-mir-522	3.89869	1.24982	30.4752	3.38169e-08	1.44989e-07
hsa-mir-525	1.0523	0.234683	5.36779	0.0205119	0.0366807
hsa-mir-527	1.77604	-0.0423097	8.45736	0.0036357	0.00769978
hsa-mir-548au	1.43393	-0.196482	36.5846	1.4618e-09	7.1659e-09
hsa-mir-548az	1.37407	-0.616456	14.1709	0.000166932	0.000450943
hsa-mir-548d-1	1.38553	-0.427899	19.3449	1.09109e-05	3.44529e-05
hsa-mir-548d-2	1.17692	-0.471381	14.0165	0.000181215	0.000484854
hsa-mir-548e	1.20605	0.139671	44.8954	2.07844e-11	1.19916e-10
hsa-mir-548f-1	2.43991	-0.243681	26.5326	2.59123e-07	9.98049e-07
hsa-mir-548t	1.0755	-0.393561	21.3376	3.85099e-06	1.25853e-05
hsa-mir-549a	2.12181	-0.495025	49.3044	2.19174e-12	1.34773e-11
hsa-mir-551b	-2.19719	1.4652	268.091	2.95719e-60	1.18457e-58
hsa-mir-552	1.82819	0.0261022	17.9043	2.32291e-05	7.11073e-05
hsa-mir-556	1.43426	0.512164	43.0433	5.35408e-11	2.99061e-10
hsa-mir-5571	1.50285	-0.393279	16.9217	3.89528e-05	0.000115458
hsa-mir-5581	1.12974	-0.205539	26.7805	2.27926e-07	8.85188e-07
hsa-mir-5586	1.08085	2.09914	74.9539	4.81828e-18	4.24857e-17
hsa-mir-559	1.03578	-0.58754	10.81	0.00100951	0.00235105
hsa-mir-5681b	1.92518	-0.509173	25.0239	5.66248e-07	2.07822e-06
hsa-mir-5683	-2.33247	3.93386	220.197	8.19229e-50	2.80136e-48
hsa-mir-5684	1.38656	0.365212	65.5743	5.59638e-16	4.31106e-15
hsa-mir-5691	1.42266	-0.0429826	28.5071	9.33564e-08	3.84958e-07
hsa-mir-5694	1.80388	0.584952	41.4788	1.19156e-10	6.42528e-10
hsa-mir-5695	1.53519	-0.135995	39.1712	3.88225e-10	2.01589e-09
hsa-mir-573	1.81679	-0.571014	32.434	1.23309e-08	5.45362e-08
hsa-mir-577	1.8142	4.05867	21.6861	3.21115e-06	1.07447e-05
hsa-mir-584	-1.21151	5.849	90.4191	1.92697e-21	1.98648e-20
hsa-mir-585	-1.86015	0.299877	162.837	2.71536e-37	6.56367e-36
hsa-mir-590	1.25259	4.43533	103.087	3.20822e-24	3.91124e-23
hsa-mir-592	4.45788	2.35852	349.854	4.55944e-78	2.55693e-76
hsa-mir-600	1.18581	-0.605342	19.8193	8.51198e-06	2.71223e-05
hsa-mir-605	-1.26515	0.0879132	72.2462	1.89959e-17	1.61408e-16
hsa-mir-607	-1.7425	-0.215962	127.767	1.26196e-29	2.01053e-28
hsa-mir-6087	-1.02272	-0.604172	16.8338	4.08004e-05	0.000120426
hsa-mir-6125	1.18348	-0.334992	30.7999	2.86053e-08	1.2302e-07
hsa-mir-615	1.31408	3.73184	57.9599	2.67518e-14	1.84759e-13
hsa-mir-618	1.06969	0.520113	16.843	4.06021e-05	0.000120093
hsa-mir-639	1.77238	0.143616	75.5034	3.64773e-18	3.2574e-17
hsa-mir-6507	-2.59173	-0.247945	172.383	2.2319e-39	5.90401e-38
hsa-mir-651	1.02973	1.76581	71.3017	3.06566e-17	2.57043e-16
hsa-mir-6510	-1.14006	3.38786	28.0242	1.19807e-07	4.86869e-07
hsa-mir-6513	-1.54367	-0.493934	83.6802	5.81656e-20	5.62401e-19
hsa-mir-654	-1.05603	4.68658	83.4877	6.41147e-20	6.15677e-19
hsa-mir-658	1.37853	-0.237908	41.1458	1.41287e-10	7.53175e-10
hsa-mir-665	-1.75284	0.153759	171.336	3.7792e-39	9.81191e-38
hsa-mir-671	1.07025	3.2617	110.946	6.07906e-26	8.35572e-25
hsa-mir-6715a	-2.4632	-0.0641816	119.118	9.86664e-28	1.45611e-26
hsa-mir-6715b	-1.88891	-0.636174	52.8697	3.56418e-13	2.28173e-12
hsa-mir-6716	-1.35877	0.534121	189.61	3.86782e-43	1.12973e-41
hsa-mir-6717	-1.59699	-0.646448	49.809	1.69468e-12	1.04667e-11
hsa-mir-6728	1.61388	-0.478612	22.8601	1.74233e-06	6.07649e-06
hsa-mir-6730	-1.71454	-0.480722	94.9767	1.92636e-22	2.10966e-21
hsa-mir-6737	1.10862	-0.272441	21.3968	3.73388e-06	1.22597e-05
hsa-mir-6744	1.96266	-0.520445	25.8061	3.77486e-07	1.42267e-06
hsa-mir-6746	-2.19602	-0.57844	133.824	5.96914e-31	1.05933e-29
hsa-mir-675	-1.13521	5.70151	71.1597	3.29443e-17	2.73301e-16
hsa-mir-6756	-1.25429	-0.73968	33.5093	7.09255e-09	3.21804e-08
hsa-mir-676	-1.29739	0.510242	128.294	9.6786e-30	1.5597e-28
hsa-mir-6766	-1.45353	-0.603122	58.7867	1.75728e-14	1.22573e-13
hsa-mir-6773	1.69158	-0.535176	27.9437	1.24896e-07	5.04622e-07
hsa-mir-6777	1.01544	0.179467	23.508	1.24396e-06	4.42647e-06
hsa-mir-6781	1.13647	-0.302539	21.5248	3.49286e-06	1.15223e-05
hsa-mir-6783	1.47668	-0.100151	33.7391	6.30197e-09	2.86862e-08
hsa-mir-6809	-1.95222	-0.708768	102.678	3.94228e-24	4.76473e-23
hsa-mir-6822	1.23699	-0.656983	21.5324	3.47909e-06	1.1504e-05
hsa-mir-6827	-1.2085	-0.610343	35.5042	2.54505e-09	1.20954e-08
hsa-mir-6832	1.21693	-0.551051	11.8776	0.00056812	0.00138764
hsa-mir-6840	1.21717	-0.678995	11.6718	0.000634534	0.0015418
hsa-mir-6844	1.85262	-0.400254	33.8434	5.97328e-09	2.73678e-08
hsa-mir-6850	1.54835	-0.573853	15.1682	9.83475e-05	0.000272496
hsa-mir-6854	1.28019	0.530735	65.1691	6.87388e-16	5.26622e-15
hsa-mir-6883	-1.857	-0.703274	98.0769	4.02444e-23	4.5872e-22
hsa-mir-6891	1.26731	-0.445721	18.3518	1.83644e-05	5.65866e-05
hsa-mir-6892	-1.34673	1.83827	188.793	5.83038e-43	1.6682e-41
hsa-mir-7-1	1.28693	5.3203	99.0282	2.48926e-23	2.90829e-22
hsa-mir-7-2	1.03136	0.794011	19.6258	9.41891e-06	2.98763e-05
hsa-mir-7-3	3.02154	0.75368	96.8338	7.53973e-23	8.52475e-22
hsa-mir-7112	1.1696	-0.174358	14.6975	0.000126215	0.000346967
hsa-mir-7156	2.94198	0.888183	79.5583	4.68213e-19	4.37623e-18
hsa-mir-7161	1.01577	-0.710731	14.6087	0.000132304	0.000361195
hsa-mir-760	2.37535	2.09264	118.353	1.45156e-27	2.09803e-26
hsa-mir-767	6.12184	3.64905	67.0791	2.60835e-16	2.0723e-15
hsa-mir-770	-1.38929	-0.610677	32.2149	1.38026e-08	6.08528e-08
hsa-mir-7705	2.90826	0.75291	196.227	1.39096e-44	4.23939e-43
hsa-mir-7706	1.61321	1.52401	108.633	1.95283e-25	2.5829e-24
hsa-mir-7974	2.10837	-0.290718	45.7985	1.31066e-11	7.65646e-11
hsa-mir-7976	-1.27154	-0.554785	39.3891	3.47234e-10	1.8165e-09
hsa-mir-802	1.96583	-0.578193	10.4514	0.00122559	0.00281225
hsa-mir-873	1.24483	-0.4819	9.06603	0.00260402	0.00560804
hsa-mir-877	1.83958	1.4773	81.2185	2.02087e-19	1.91437e-18
hsa-mir-885	1.48798	1.90479	18.0678	2.13178e-05	6.55429e-05
hsa-mir-891a	-1.2152	1.71672	34.5777	4.09581e-09	1.90143e-08
hsa-mir-9-1	2.06771	10.1257	59.7403	1.08235e-14	7.74215e-14
hsa-mir-9-2	2.06494	10.1246	59.5067	1.21878e-14	8.58655e-14
hsa-mir-9-3	2.064	10.1295	59.5439	1.19596e-14	8.46835e-14
hsa-mir-92b	1.49258	7.04949	128.948	6.96353e-30	1.13522e-28
hsa-mir-93	1.20061	12.4202	130.532	3.13476e-30	5.35968e-29
hsa-mir-934	1.56464	3.16682	13.0234	0.000307626	0.000787028
hsa-mir-937	2.61562	2.28655	110.365	8.15311e-26	1.0991e-24
hsa-mir-939	1.04473	0.893843	44.3387	2.76196e-11	1.587e-10
hsa-mir-940	2.13298	2.67269	119.292	9.03839e-28	1.34807e-26
hsa-mir-944	-1.23447	1.45853	54.0023	2.00257e-13	1.29382e-12
hsa-mir-96	3.23627	5.33241	477.994	5.8366e-106	4.3068e-104
hsa-mir-99a	-2.04479	9.84728	495.364	9.6998e-110	9.7137e-108

## Sheet: CESC
miRNA	logFC	logCPM	LR	PValue	FDR
hsa-mir-1-1	-3.48521	3.23701	45.0098	1.96051e-11	3.04096e-09
hsa-mir-1-2	-3.53952	3.31748	47.1614	6.53745e-12	1.15622e-09
hsa-mir-100	-2.41585	11.439	19.5503	9.79847e-06	0.000390819
hsa-mir-106a	4.44071	5.54457	15.2257	9.53951e-05	0.00233634
hsa-mir-106b	2.84745	9.93121	27.4953	1.57475e-07	1.29315e-05
hsa-mir-107	1.66737	6.39409	12.8567	0.000336279	0.00652007
hsa-mir-10b	-2.88407	15.0847	68.9734	9.98001e-17	6.96605e-14
hsa-mir-1181	3.71996	-0.472802	10.4186	0.0012475	0.0159772
hsa-mir-1225	-2.16213	-1.15227	8.24746	0.00408091	0.0384929
hsa-mir-1249	2.0225	1.30918	7.84335	0.00510079	0.0438775
hsa-mir-125a	-1.28002	9.22155	10.152	0.00144142	0.0179663
hsa-mir-125b-1	-1.83853	8.6874	12.104	0.000503129	0.00898983
hsa-mir-125b-2	-1.73478	8.84697	9.93429	0.00162228	0.0196931
hsa-mir-1277	3.40875	0.843911	18.6142	1.60024e-05	0.000620536
hsa-mir-128-1	1.58366	6.80509	8.40216	0.00374776	0.0361095
hsa-mir-128-2	1.60902	6.36528	7.58663	0.00588027	0.0488622
hsa-mir-129-1	-2.76635	1.68233	13.2372	0.000274446	0.00547324
hsa-mir-129-2	-2.77654	1.81056	14.1802	0.000166109	0.00386481
hsa-mir-1293	6.67155	2.5905	10.6822	0.00108168	0.0147716
hsa-mir-1301	2.18616	3.78195	9.241	0.00236656	0.02622
hsa-mir-1307	3.13149	10.5748	23.9203	1.00405e-06	5.60661e-05
hsa-mir-130b	4.10271	5.61825	25.3361	4.81604e-07	3.056e-05
hsa-mir-133a-1	-3.81766	2.78029	55.7013	8.4363e-14	2.94427e-11
hsa-mir-133a-2	-3.95147	2.68883	64.0807	1.19428e-15	5.55741e-13
hsa-mir-133b	-2.99951	0.914046	18.3665	1.82231e-05	0.000671123
hsa-mir-135b	4.65676	6.05589	16.2583	5.52664e-05	0.0014557
hsa-mir-139	-1.88843	4.90469	20.7312	5.28471e-06	0.000223559
hsa-mir-140	-2.02827	9.71843	53.2627	2.91788e-13	8.14673e-11
hsa-mir-141	5.63302	11.0171	47.1351	6.62592e-12	1.15622e-09
hsa-mir-142	4.39086	11.3735	22.6098	1.98466e-06	0.000101815
hsa-mir-143	-2.2328	16.2309	22.555	2.04214e-06	0.000101815
hsa-mir-145	-3.61181	10.6275	77.6094	1.25568e-18	1.75293e-15
hsa-mir-147b	4.66704	1.49191	10.7433	0.00104655	0.0144652
hsa-mir-148b	1.815	7.0809	22.2953	2.3378e-06	0.000112537
hsa-mir-1537	3.56407	-0.537891	10.1555	0.00143874	0.0179663
hsa-mir-1538	3.3095	-0.652489	8.7441	0.00310606	0.03165
hsa-mir-155	2.98594	9.23969	11.4552	0.000712954	0.01131
hsa-mir-15a	2.10832	7.79194	17.236	3.30128e-05	0.00104741
hsa-mir-15b	3.56055	8.9005	29.4709	5.67624e-08	6.09541e-06
hsa-mir-16-1	3.08361	8.69562	25.7144	3.95863e-07	2.76312e-05
hsa-mir-16-2	3.18167	8.7571	26.9743	2.06178e-07	1.59903e-05
hsa-mir-17	1.80877	10.1866	11.8524	0.000575869	0.00980382
hsa-mir-182	5.171	14.3288	24.3124	8.19102e-07	4.76444e-05
hsa-mir-183	6.25441	13.1007	26.646	2.44355e-07	1.79537e-05
hsa-mir-185	2.56752	6.76879	18.1848	2.00474e-05	0.000717595
hsa-mir-18a	3.92645	4.86362	22.5567	2.04033e-06	0.000101815
hsa-mir-18b	3.73759	1.25014	10.8228	0.00100259	0.0142818
hsa-mir-191	1.53442	8.90381	7.83542	0.00512323	0.0438775
hsa-mir-1910	5.23764	0.402235	7.67153	0.00560989	0.0471772
hsa-mir-1976	3.36609	3.61061	29.2988	6.20329e-08	6.18556e-06
hsa-mir-200a	4.54538	10.6868	25.5718	4.26233e-07	2.83343e-05
hsa-mir-200b	3.58734	10.336	17.0003	3.73738e-05	0.00111008
hsa-mir-200c	5.00264	13.4629	41.0676	1.47055e-10	2.05288e-08
hsa-mir-203a	6.56064	15.7549	17.7524	2.51599e-05	0.000843755
hsa-mir-203b	5.50017	7.30903	16.5573	4.72021e-05	0.00131788
hsa-mir-204	-3.14034	3.34128	11.0333	0.000894891	0.013433
hsa-mir-205	8.61055	13.8481	21.5132	3.51393e-06	0.00015824
hsa-mir-20a	2.16403	9.06637	10.4423	0.00123163	0.0159772
hsa-mir-20b	5.29412	6.94206	12.776	0.000351091	0.00671402
hsa-mir-21	2.63875	18.4896	51.1592	8.51721e-13	1.98167e-10
hsa-mir-210	5.75325	10.4525	20.9373	4.74556e-06	0.000207025
hsa-mir-2110	1.66814	1.20577	9.07947	0.00258494	0.0279735
hsa-mir-224	4.28593	7.61867	14.8599	0.0001158	0.00278718
hsa-mir-2277	4.15227	1.07998	16.2672	5.50091e-05	0.0014557
hsa-mir-24-1	1.66697	10.4965	10.4226	0.00124481	0.0159772
hsa-mir-24-2	1.74911	10.4978	11.3267	0.00076399	0.0118503
hsa-mir-27a	1.99091	11.4155	11.8536	0.000575486	0.00980382
hsa-mir-301b	4.50147	1.23968	13.36	0.000257046	0.00529233
hsa-mir-31	6.2964	7.12786	18.3618	1.82684e-05	0.000671123
hsa-mir-3176	3.48802	-0.574271	8.07607	0.00448537	0.0414674
hsa-mir-3194	3.77235	-0.464171	10.6516	0.00109976	0.0147716
hsa-mir-3199-1	-1.79379	-0.613889	10.9022	0.000960489	0.0141141
hsa-mir-32	3.19311	5.58841	27.8863	1.28654e-07	1.12251e-05
hsa-mir-324	1.57771	5.50888	7.92981	0.00486268	0.0426937
hsa-mir-330	2.6323	5.52814	11.6256	0.000650493	0.0106834
hsa-mir-331	2.38072	4.75138	15.8044	7.02392e-05	0.0017828
hsa-mir-33a	2.97561	5.59352	11.4068	0.000731772	0.0114781
hsa-mir-33b	4.76181	3.00774	18.1266	2.06696e-05	0.00072137
hsa-mir-345	3.15332	4.4686	12.5642	0.0003932	0.00722247
hsa-mir-3613	3.45596	4.13911	28.6523	8.66132e-08	8.0608e-06
hsa-mir-3614	4.53162	3.03904	16.5179	4.81926e-05	0.00131915
hsa-mir-3615	2.22636	2.85272	11.245	0.000798398	0.012248
hsa-mir-3616	4.29924	-0.191356	8.70981	0.00316503	0.0320173
hsa-mir-3619	4.14614	-0.264591	8.91357	0.00283059	0.0292704
hsa-mir-363	4.81521	5.92827	13.9238	0.000190368	0.00421831
hsa-mir-3651	4.44939	1.35319	11.6971	0.000625959	0.0104028
hsa-mir-3652	3.03945	0.779763	7.97365	0.00474631	0.0424734
hsa-mir-3678	3.14337	-0.16589	8.1979	0.0041939	0.0392932
hsa-mir-3680-1	3.6814	-0.496559	9.33508	0.00224808	0.0251066
hsa-mir-3682	2.38408	0.861194	8.32012	0.00392084	0.0372346
hsa-mir-3922	2.33283	0.649986	8.86833	0.0029016	0.0297841
hsa-mir-3934	4.77605	2.49535	29.9863	4.35102e-08	5.06169e-06
hsa-mir-3940	2.97387	0.744936	8.40077	0.00375063	0.0361095
hsa-mir-3942	3.28664	-0.0386643	8.59622	0.00336861	0.0333604
hsa-mir-421	2.65597	2.03996	12.4824	0.000410806	0.00744785
hsa-mir-425	2.89178	8.19818	13.9318	0.000189561	0.00421831
hsa-mir-429	4.77729	7.72525	22.1854	2.47549e-06	0.000115193
hsa-mir-452	2.74574	8.11045	10.553	0.00115999	0.0154223
hsa-mir-4638	4.75614	0.102182	17.2926	3.20436e-05	0.0010403
hsa-mir-4652	7.11185	1.94528	10.9408	0.000940692	0.0139703
hsa-mir-4664	4.95658	0.227036	14.0028	0.000182537	0.00417739
hsa-mir-4668	1.96352	1.24592	8.96372	0.00275393	0.0290189
hsa-mir-4677	1.38737	3.41289	8.35285	0.00385083	0.0368202
hsa-mir-4724	5.08159	0.301266	9.73303	0.00180986	0.0215946
hsa-mir-4741	3.32181	-0.650317	7.60357	0.00582529	0.0486952
hsa-mir-4742	2.64204	-0.0655181	8.59575	0.00336949	0.0333604
hsa-mir-4746	3.84188	3.03902	20.5835	5.70848e-06	0.000234383
hsa-mir-4755	3.09894	-0.734248	8.09077	0.00444912	0.0414065
hsa-mir-4758	4.28522	-0.191908	8.03697	0.00458322	0.0420455
hsa-mir-4772	2.80258	3.66913	11.7743	0.000600532	0.0101005
hsa-mir-4777	3.91389	-0.391976	11.468	0.000708051	0.01131
hsa-mir-4797	2.87926	0.372402	9.40969	0.00215842	0.0251066
hsa-mir-484	1.8689	6.21651	10.3434	0.00129938	0.0164903
hsa-mir-5001	3.32662	0.424427	11.502	0.000695195	0.0112848
hsa-mir-504	-2.25465	-0.35234	9.06182	0.00261003	0.0280277
hsa-mir-548aw	-1.67406	-0.709787	7.98291	0.00472209	0.0424734
hsa-mir-548ba	-2.41094	-1.10898	8.00221	0.00467203	0.0423517
hsa-mir-548d-1	3.60325	-0.535995	9.67989	0.00186296	0.0220398
hsa-mir-548d-2	3.54007	-0.561129	8.9566	0.00276469	0.0290189
hsa-mir-548e	2.86289	0.060477	11.2232	0.000807807	0.0122576
hsa-mir-548j	4.90542	0.186539	17.141	3.47041e-05	0.00105983
hsa-mir-550a-2	2.0864	2.01417	8.02715	0.00460814	0.0420455
hsa-mir-556	4.96808	0.224852	13.01	0.000309839	0.00609205
hsa-mir-5581	3.53957	-0.557602	9.39341	0.00217766	0.0251066
hsa-mir-5684	2.5111	0.130404	7.93484	0.00484918	0.0426937
hsa-mir-579	3.99724	0.443711	12.739	0.000358113	0.00675574
hsa-mir-589	1.70124	6.17194	10.5043	0.00119098	0.015685
hsa-mir-590	1.77016	4.61591	11.8697	0.00057056	0.00980382
hsa-mir-616	2.3669	1.71965	10.8734	0.000975561	0.0141863
hsa-mir-625	1.8854	8.17368	9.1222	0.00252526	0.0275411
hsa-mir-629	1.71801	7.3571	7.87758	0.00500514	0.0435162
hsa-mir-636	3.57578	-0.541257	9.57595	0.00197143	0.023127
hsa-mir-642a	3.90224	1.52623	14.3916	0.000148466	0.00351286
hsa-mir-643	2.7556	0.552265	10.8459	0.000990139	0.0142498
hsa-mir-6499	5.25378	2.5226	9.34903	0.00223104	0.0251066
hsa-mir-6507	-2.63452	-0.28933	9.01126	0.00268321	0.0285936
hsa-mir-6509	2.52038	1.52204	9.13119	0.00251289	0.0275411
hsa-mir-651	2.73288	2.59772	12.6173	0.000382197	0.00711396
hsa-mir-6510	7.29846	4.40834	9.35739	0.00222088	0.0251066
hsa-mir-6516	2.73788	-0.372452	7.94646	0.00481817	0.0426937
hsa-mir-652	2.33379	5.08112	15.552	8.02662e-05	0.00200092
hsa-mir-6731	3.15976	-0.706222	8.50345	0.00354473	0.0346045
hsa-mir-6783	3.13513	-0.136162	8.63874	0.00329089	0.033051
hsa-mir-6793	3.43721	-0.578923	9.80836	0.00173721	0.0209064
hsa-mir-6806	1.77121	0.573063	7.87269	0.0050187	0.0435162
hsa-mir-6842	2.52467	1.82847	10.0029	0.00156294	0.0193085
hsa-mir-6854	3.04744	0.862379	12.0834	0.000508737	0.00898983
hsa-mir-6877	3.92616	-0.374659	10.7816	0.00102516	0.0143298
hsa-mir-6892	-1.46899	1.08762	7.79108	0.00525049	0.0446932
hsa-mir-7-1	2.10497	4.9709	10.6504	0.00110046	0.0147716
hsa-mir-7-3	4.09635	0.511363	10.7792	0.00102649	0.0143298
hsa-mir-7155	3.4286	-0.605712	8.52554	0.00350198	0.0344279
hsa-mir-766	2.73315	3.54683	13.2544	0.000271945	0.00547324
hsa-mir-7702	5.07891	1.31476	7.7238	0.00544977	0.0461084
hsa-mir-7706	2.96606	1.47923	16.5647	4.70181e-05	0.00131788
hsa-mir-7854	4.61029	0.0100158	17.1291	3.49227e-05	0.00105983
hsa-mir-7974	4.52621	-0.0522831	9.94316	0.00161448	0.0196931
hsa-mir-877	4.08853	1.81697	13.618	0.000224021	0.00482909
hsa-mir-92a-1	1.89168	13.0428	13.6111	0.00022485	0.00482909
hsa-mir-92a-2	1.8864	12.9117	13.502	0.000238308	0.00504057
hsa-mir-93	2.42024	12.8898	17.7354	2.53852e-05	0.000843755
hsa-mir-937	3.88573	1.59027	9.37453	0.00220022	0.0251066
hsa-mir-940	4.37982	2.27618	16.6587	4.47439e-05	0.0013013
hsa-mir-942	3.54508	3.86901	25.1047	5.4299e-07	3.29571e-05
hsa-mir-944	9.13557	6.72389	15.8643	6.80494e-05	0.0017592
hsa-mir-95	4.02962	3.22799	13.3546	0.000257792	0.00529233
hsa-mir-96	6.60099	4.94494	34.1125	5.20169e-09	6.60141e-07
hsa-mir-99a	-1.99246	10.0255	8.93165	0.00280271	0.0291984

## Sheet: CHOL
miRNA	logFC	logCPM	LR	PValue	FDR
hsa-let-7c	-2.25821	10.9528	85.4279	2.40311e-20	3.89303e-18
hsa-let-7e	1.22573	9.82413	28.7418	8.27001e-08	2.2329e-06
hsa-mir-101-1	-2.04053	13.352	56.4601	5.73502e-14	4.12922e-12
hsa-mir-101-2	-2.04542	13.3694	56.5337	5.52441e-14	4.12922e-12
hsa-mir-105-2	8.67628	3.0924	7.575	0.00591834	0.0403693
hsa-mir-10b	2.28111	12.6272	12.1328	0.000495416	0.00558313
hsa-mir-122	-4.12456	13.2819	31.5293	1.96454e-08	5.92104e-07
hsa-mir-1224	4.53143	0.828536	13.4066	0.000250735	0.00315488
hsa-mir-1228	-1.67742	0.605402	24.22	8.59356e-07	1.85621e-05
hsa-mir-1250	3.16776	-0.840839	8.5868	0.00338608	0.0267583
hsa-mir-1258	-4.79241	1.60686	71.0329	3.51312e-17	3.25214e-15
hsa-mir-125b-1	-1.27099	8.57834	23.034	1.59163e-06	3.17346e-05
hsa-mir-125b-2	-1.31771	8.64909	24.9156	5.98968e-07	1.33838e-05
hsa-mir-1266	2.07611	2.32117	17.4106	3.01138e-05	0.000500352
hsa-mir-1269b	-4.10039	-0.735292	15.7721	7.14496e-05	0.00102887
hsa-mir-129-1	2.2363	1.21136	8.2142	0.00415639	0.0313179
hsa-mir-1295b	-4.33091	2.68047	34.4995	4.26361e-09	1.45412e-07
hsa-mir-1301	1.35816	3.03682	16.4433	5.01283e-05	0.000755422
hsa-mir-1302-3	-1.7886	-1.27636	7.18471	0.00735276	0.0469418
hsa-mir-1304	2.17806	-0.0962246	8.09067	0.00444938	0.0331402
hsa-mir-135b	4.62365	5.08028	23.959	9.84097e-07	2.05708e-05
hsa-mir-137	4.65447	1.53587	8.64115	0.00328655	0.0261311
hsa-mir-139	-2.83469	7.31767	70.7017	4.15545e-17	3.59031e-15
hsa-mir-141	4.72888	8.12613	14.4116	0.000146891	0.00199233
hsa-mir-144	-2.26422	6.84229	19.8626	8.32103e-06	0.000152466
hsa-mir-1468	-2.26315	3.53788	44.6188	2.39381e-11	1.19322e-09
hsa-mir-146b	-1.07751	9.41526	10.4922	0.00119881	0.0115086
hsa-mir-148a	-2.78512	15.6432	106.346	6.19376e-25	8.02711e-22
hsa-mir-149	1.66094	4.0428	13.0657	0.000300756	0.0036428
hsa-mir-152	-1.3051	7.71781	37.2539	1.03709e-09	4.20019e-08
hsa-mir-181a-1	1.15407	10.6494	14.8002	0.00011952	0.00164786
hsa-mir-181a-2	1.09357	11.4456	12.3524	0.000440427	0.00505127
hsa-mir-181b-1	1.89994	8.43697	31.0077	2.57003e-08	7.24078e-07
hsa-mir-181b-2	1.96165	8.43999	32.2047	1.38755e-08	4.38602e-07
hsa-mir-181c	1.7052	6.87207	23.3478	1.352e-06	2.73779e-05
hsa-mir-181d	2.42439	4.74895	37.1563	1.0903e-09	4.28189e-08
hsa-mir-182	4.33809	13.4075	92.7229	6.01534e-22	1.94897e-19
hsa-mir-183	4.68781	11.8068	88.7014	4.59139e-21	9.91739e-19
hsa-mir-187	2.56892	4.1005	11.008	0.000907216	0.00925789
hsa-mir-1908	-2.30642	-1.18681	10.8392	0.000993711	0.00990654
hsa-mir-192	-1.99593	14.3574	28.2702	1.0551e-07	2.79063e-06
hsa-mir-193a	-1.09026	8.78326	17.1815	3.39724e-05	0.000550352
hsa-mir-194-1	-1.76581	11.9344	25.1464	5.31397e-07	1.20823e-05
hsa-mir-194-2	-1.77825	12.0614	25.83	3.72842e-07	8.78552e-06
hsa-mir-196a-1	5.14398	4.07214	12.8665	0.000334508	0.00394112
hsa-mir-196a-2	4.79938	4.20559	10.9607	0.000930662	0.00942295
hsa-mir-196b	4.21682	6.51345	16.5057	4.8504e-05	0.000739543
hsa-mir-200a	2.57369	9.65907	30.4401	3.44333e-08	9.4948e-07
hsa-mir-200b	2.69272	9.52382	36.6855	1.38811e-09	4.9972e-08
hsa-mir-200c	5.17072	10.6333	16.2547	5.53732e-05	0.000806334
hsa-mir-203b	4.94807	3.52663	12.5165	0.000403372	0.00466759
hsa-mir-205	5.36949	3.33503	8.16298	0.00427541	0.0320285
hsa-mir-21	2.26561	18.5015	92.9812	5.27938e-22	1.94897e-19
hsa-mir-211	-2.13477	-0.419266	9.2205	0.0023932	0.0205443
hsa-mir-218-1	1.44248	5.04673	13.2047	0.000279246	0.00347983
hsa-mir-218-2	1.56052	4.98641	13.9859	0.000184187	0.00241118
hsa-mir-219a-1	-1.14411	1.59897	12.9279	0.000323728	0.0038491
hsa-mir-22	-1.41663	16.9494	50.1152	1.44976e-12	8.94709e-11
hsa-mir-221	1.7152	7.28949	26.3761	2.80989e-07	6.74374e-06
hsa-mir-222	1.90049	5.41408	31.0779	2.47871e-08	7.1387e-07
hsa-mir-23a	1.34201	11.9687	31.3692	2.13342e-08	6.2839e-07
hsa-mir-23c	-1.18291	0.432387	8.28098	0.00400625	0.0308807
hsa-mir-2681	-2.12491	-1.21552	9.02556	0.00266231	0.0218377
hsa-mir-27a	1.76383	10.4065	49.2863	2.21204e-12	1.3031e-10
hsa-mir-301a	1.13188	3.10861	16.6744	4.4376e-05	0.000692906
hsa-mir-30e	-1.00185	13.7945	19.2114	1.17011e-05	0.000210619
hsa-mir-31	4.01061	2.80154	9.12054	0.00252756	0.0212709
hsa-mir-3127	1.41054	2.11466	8.01327	0.00464357	0.0341936
hsa-mir-3133	-2.22615	-1.19451	9.24341	0.00236345	0.0205443
hsa-mir-3145	-1.87609	-0.988138	8.37581	0.00380247	0.0296868
hsa-mir-3163	-2.37619	-1.26072	13.0959	0.000295951	0.00362434
hsa-mir-3188	-1.98451	-1.04165	8.64142	0.00328606	0.0261311
hsa-mir-3189	2.63967	-0.346408	8.25494	0.00406413	0.0308807
hsa-mir-3200	1.83674	1.47516	12.0283	0.000523998	0.00585433
hsa-mir-320b-2	1.50685	1.18926	9.20675	0.00241124	0.020559
hsa-mir-328	-1.11628	5.02053	14.4028	0.00014758	0.00199233
hsa-mir-330	1.62732	4.11367	26.7577	2.30635e-07	5.74813e-06
hsa-mir-33b	-1.54837	2.51157	16.9474	3.84304e-05	0.000607387
hsa-mir-340	-1.00087	4.62501	24.6369	6.92154e-07	1.52039e-05
hsa-mir-34b	6.22956	0.904593	36.8253	1.29203e-09	4.78419e-08
hsa-mir-34c	4.73752	2.95988	43.7504	3.73036e-11	1.72662e-09
hsa-mir-3614	-1.52491	1.46385	23.8703	1.03052e-06	2.11992e-05
hsa-mir-365a	-1.13201	5.86836	16.2585	5.52616e-05	0.000806334
hsa-mir-365b	-1.1303	5.8612	16.5409	4.76116e-05	0.00073458
hsa-mir-3691	2.72285	-0.588689	9.46386	0.0020956	0.0184755
hsa-mir-378a	-2.98757	9.28138	77.3081	1.46268e-18	1.7233e-16
hsa-mir-378c	-2.68957	3.16159	55.8019	8.01521e-14	5.46722e-12
hsa-mir-378d-1	-2.02592	-0.694704	11.4155	0.000728351	0.00767434
hsa-mir-378d-2	-3.17139	-0.318553	46.4345	9.47327e-12	5.11557e-10
hsa-mir-383	-2.88646	1.27547	34.1766	5.03306e-09	1.67253e-07
hsa-mir-3913-1	1.4078	1.38448	7.42149	0.00644496	0.043278
hsa-mir-3934	1.92573	0.945425	12.9955	0.000312234	0.00374681
hsa-mir-3944	-1.90107	-0.569649	10.6193	0.00111914	0.0108239
hsa-mir-424	-1.75792	7.55686	36.9476	1.2135e-09	4.62557e-08
hsa-mir-4286	-1.79619	-1.00201	7.36498	0.00665064	0.0439757
hsa-mir-429	2.6774	6.86683	26.5002	2.63517e-07	6.44373e-06
hsa-mir-4326	1.34399	2.27346	7.30105	0.00689143	0.0448809
hsa-mir-4443	-2.38926	-0.890105	19.9516	7.94269e-06	0.000149184
hsa-mir-4473	2.26618	-0.320355	10.1543	0.00143962	0.0136186
hsa-mir-4484	-1.92893	-0.870526	10.6429	0.00110494	0.0107669
hsa-mir-451a	-1.40978	8.69697	7.41135	0.00648137	0.0432982
hsa-mir-4524a	-3.85128	-0.397799	74.7543	5.33085e-18	5.31445e-16
hsa-mir-454	1.51027	2.9963	27.9423	1.24987e-07	3.23966e-06
hsa-mir-455	-1.81516	9.6198	27.5296	1.54711e-07	3.93148e-06
hsa-mir-4640	2.89552	-0.921501	9.64174	0.00190205	0.0170004
hsa-mir-4649	2.9825	-0.891838	9.24008	0.00236774	0.0205443
hsa-mir-4662a	-3.13075	4.55629	89.4701	3.11306e-21	8.06905e-19
hsa-mir-4670	-2.32382	-1.17646	9.66605	0.00187705	0.0168934
hsa-mir-4686	-4.69673	-0.467863	87.5363	8.27451e-21	1.53197e-18
hsa-mir-4699	-2.55432	-0.947294	18.9257	1.35906e-05	0.000241279
hsa-mir-4705	-2.19722	-0.976355	11.7704	0.000601816	0.00649961
hsa-mir-4732	-1.82055	-0.584757	7.76305	0.00533259	0.03756
hsa-mir-4746	1.61595	0.940735	10.6465	0.00110277	0.0107669
hsa-mir-4751	-3.39057	-1.01598	25.304	4.89681e-07	1.13326e-05
hsa-mir-4773-1	2.74769	-0.964825	8.33026	0.003899	0.0302581
hsa-mir-4773-2	2.66123	-0.99824	7.97739	0.00473652	0.0345783
hsa-mir-4791	-1.34709	-0.377705	7.59689	0.00584692	0.0400931
hsa-mir-4800	-2.22449	-0.885765	13.4339	0.000247117	0.00315488
hsa-mir-483	-3.53793	4.95181	46.4935	9.19237e-12	5.11557e-10
hsa-mir-486-1	-1.69858	5.61543	13.8596	0.000196985	0.00255292
hsa-mir-486-2	-1.62689	5.61304	11.9203	0.000555252	0.00615048
hsa-mir-490	-4.40378	1.29566	54.6409	1.44691e-13	9.37598e-12
hsa-mir-505	-2.0742	5.88101	69.9754	6.00498e-17	4.86403e-15
hsa-mir-511	-1.80695	3.05735	23.9612	9.82987e-07	2.05708e-05
hsa-mir-516a-2	3.79519	-0.612911	9.22014	0.00239367	0.0205443
hsa-mir-516b-1	3.12512	-0.853726	7.66205	0.00563943	0.0391193
hsa-mir-517a	3.97786	0.0445778	7.42503	0.00643227	0.043278
hsa-mir-517b	3.97786	0.0445778	7.42503	0.00643227	0.043278
hsa-mir-518b	3.87948	-0.573672	9.05795	0.00261555	0.0215908
hsa-mir-518c	4.35972	-0.347957	8.88078	0.00288188	0.0233432
hsa-mir-519a-1	4.26555	-0.401345	10.1626	0.00143321	0.0136186
hsa-mir-519a-2	3.11948	-0.857516	7.33422	0.0067654	0.0444832
hsa-mir-519d	3.2716	-0.807523	7.63226	0.00573335	0.0395235
hsa-mir-525	3.03436	-0.880594	7.37754	0.00660433	0.0438934
hsa-mir-526b	5.94871	0.678595	11.4451	0.000716826	0.00761481
hsa-mir-542	-1.12873	8.18729	18.6624	1.56031e-05	0.000273265
hsa-mir-544b	-2.01282	-1.14465	8.0665	0.0045091	0.0333931
hsa-mir-548b	-2.40458	0.349084	18.2089	1.97952e-05	0.000342061
hsa-mir-548j	-1.65525	0.106998	17.5214	2.84088e-05	0.000478154
hsa-mir-549a	3.92185	-0.559295	11.3175	0.000767807	0.00800353
hsa-mir-551b	-2.6313	0.995358	31.6869	1.81141e-08	5.58948e-07
hsa-mir-556	-1.50966	0.0984975	9.0133	0.00268023	0.0218464
hsa-mir-5586	1.25477	2.2189	7.3261	0.00679605	0.0444832
hsa-mir-5588	-3.73541	-0.0388143	98.8382	2.73999e-23	1.77551e-20
hsa-mir-5589	-5.44841	3.07406	77.4669	1.34967e-18	1.7233e-16
hsa-mir-5590	-2.10128	-0.898125	12.5486	0.000396506	0.00462947
hsa-mir-561	3.22529	1.02216	17.8583	2.37977e-05	0.000405813
hsa-mir-5684	2.37128	-0.479199	9.07571	0.00259027	0.0215729
hsa-mir-5708	-2.38536	-0.860867	11.5444	0.000679544	0.00727842
hsa-mir-574	-1.46086	6.78975	38.102	6.71402e-10	2.90045e-08
hsa-mir-576	-1.05586	3.78683	19.8554	8.35267e-06	0.000152466
hsa-mir-577	3.98823	2.79487	9.07115	0.00259674	0.0215729
hsa-mir-582	-1.02949	6.98305	7.75136	0.0053672	0.0375994
hsa-mir-585	2.79704	-0.548496	7.91932	0.00489095	0.0354116
hsa-mir-598	1.22024	5.10833	11.8457	0.000577945	0.00631585
hsa-mir-600	-2.92491	-1.05131	22.1901	2.46944e-06	4.84909e-05
hsa-mir-607	-1.73879	-0.909365	7.2289	0.00717393	0.0463082
hsa-mir-6087	-2.34756	-1.15115	11.3075	0.000771946	0.00800353
hsa-mir-615	5.86699	0.633344	15.0329	0.000105651	0.00148831
hsa-mir-616	-1.03893	2.37407	8.48401	0.00358282	0.0281414
hsa-mir-618	-2.00032	1.18554	21.1681	4.20707e-06	8.13785e-05
hsa-mir-621	-3.71911	-0.966376	39.1001	4.02626e-10	1.79932e-08
hsa-mir-624	-1.66408	1.12033	35.5956	2.42839e-09	8.50594e-08
hsa-mir-625	1.69315	6.31317	12.1905	0.000480324	0.00546053
hsa-mir-642a	1.43823	1.94601	7.66042	0.00564453	0.0391193
hsa-mir-6510	2.88146	-0.92486	7.79945	0.00522622	0.0372153
hsa-mir-6511b-1	-1.07425	0.128828	8.25029	0.00407454	0.0308807
hsa-mir-6715a	-3.45894	1.93609	15.4633	8.41221e-05	0.00119805
hsa-mir-6717	-2.68945	-1.04978	17.0134	3.71172e-05	0.000593875
hsa-mir-6720	2.99737	-0.486868	14.2249	0.000162213	0.00214518
hsa-mir-6730	-2.13462	-0.752687	14.227	0.00016203	0.00214518
hsa-mir-675	-4.02238	7.12272	44.8496	2.12769e-11	1.10299e-09
hsa-mir-6761	-2.35483	0.412948	44.0263	3.24001e-11	1.5552e-09
hsa-mir-6815	-1.63853	0.404037	17.2524	3.27276e-05	0.000536898
hsa-mir-6843	-1.55399	-0.040248	9.85169	0.00169676	0.0154859
hsa-mir-6852	-1.61052	-0.548414	7.82091	0.00516451	0.036979
hsa-mir-708	2.48262	5.03053	20.8353	5.00517e-06	9.53927e-05
hsa-mir-7152	-2.15972	-1.14077	9.5354	0.00201546	0.0178907
hsa-mir-7706	1.27432	0.754987	10.0898	0.00149088	0.0140013
hsa-mir-7846	-1.73219	-0.992566	7.15604	0.0074712	0.0472325
hsa-mir-885	-3.86309	7.26839	32.8858	9.77355e-09	3.16663e-07
hsa-mir-92b	2.80941	5.70367	37.4997	9.14284e-10	3.8223e-08
hsa-mir-95	1.37236	2.73693	8.26313	0.00404582	0.0308807
hsa-mir-96	4.65335	4.41443	75.9689	2.88163e-18	3.11216e-16
hsa-mir-99a	-2.38679	9.63443	83.0635	7.94597e-20	1.14422e-17
hsa-mir-99b	1.13322	14.1653	16.4127	5.0942e-05	0.00075886

## Sheet: COAD
miRNA	logFC	logCPM	LR	PValue	FDR
hsa-let-7a-1	-1.54367	12.674	64.3777	1.02713e-15	1.15203e-14
hsa-let-7a-2	-1.54993	12.6708	64.9158	7.81669e-16	8.98278e-15
hsa-let-7a-3	-1.54581	12.6779	64.8212	8.20102e-16	9.34783e-15
hsa-let-7b	-3.4625	13.4677	551.022	7.54546e-122	1.51125e-119
hsa-let-7c	-2.77801	8.98788	89.2997	3.39309e-21	5.66323e-20
hsa-let-7d	-3.61829	9.53587	635.374	3.38833e-140	1.18761e-137
hsa-let-7e	-1.18846	9.15886	18.1398	2.05263e-05	9.25334e-05
hsa-let-7f-1	3.32262	11.8981	38.4292	5.67759e-10	4.21163e-09
hsa-let-7f-2	3.36022	11.917	38.9843	4.27217e-10	3.20298e-09
hsa-let-7g	1.17681	9.3241	28.9538	7.41242e-08	4.4988e-07
hsa-mir-1-1	5.0037	4.4801	29.6912	5.06631e-08	3.10173e-07
hsa-mir-1-2	4.13179	4.56147	24.1868	8.74313e-07	4.71456e-06
hsa-mir-101-1	5.01943	11.6301	232.654	1.57268e-52	9.18709e-51
hsa-mir-101-2	4.99714	11.6389	233.182	1.20612e-52	7.35208e-51
hsa-mir-106a	3.73995	5.70417	19.1023	1.23894e-05	5.75163e-05
hsa-mir-10a	2.77097	16.197	43.0893	5.22975e-11	4.313e-10
hsa-mir-10b	1.77431	15.2099	30.5689	3.22212e-08	2.00774e-07
hsa-mir-1180	-3.79021	3.85041	205.056	1.64635e-46	8.24351e-45
hsa-mir-1181	-1.69002	0.135679	8.04809	0.00455515	0.0135591
hsa-mir-1224	-4.49007	1.53495	51.2328	8.20349e-13	7.61675e-12
hsa-mir-1225	-2.83103	-0.69149	9.54275	0.00200741	0.00644023
hsa-mir-1226	-3.78418	0.983744	128.983	6.84015e-30	1.71248e-28
hsa-mir-1227	-4.03457	-0.492198	48.7031	2.97796e-12	2.64247e-11
hsa-mir-1228	-3.14644	0.620812	72.5297	1.6454e-17	2.11638e-16
hsa-mir-1229	-2.60538	0.281574	24.0669	9.3048e-07	4.99821e-06
hsa-mir-1234	-3.25321	-0.678423	18.2677	1.91936e-05	8.68045e-05
hsa-mir-1245a	5.64824	1.15969	17.219	3.33093e-05	0.000144135
hsa-mir-1248	-1.29747	2.22981	9.35526	0.00222346	0.0070687
hsa-mir-1249	-3.22052	1.15721	105.059	1.1856e-24	2.44443e-23
hsa-mir-1254-1	-2.3993	-0.0617728	17.7542	2.51363e-05	0.000111171
hsa-mir-1254-2	-2.31843	-0.0780136	15.8154	6.98315e-05	0.000295782
hsa-mir-1255a	3.95045	0.0881368	5.58161	0.0181501	0.0487141
hsa-mir-125a	-3.92739	8.60807	580.441	3.00682e-128	8.43113e-126
hsa-mir-125b-1	-2.79747	7.18267	102.801	3.70471e-24	7.31549e-23
hsa-mir-125b-2	-2.77866	7.21388	101.205	8.29403e-24	1.57138e-22
hsa-mir-126	3.55292	11.1729	77.1063	1.62e-18	2.27124e-17
hsa-mir-1260b	-3.79525	-0.697708	20.4412	6.14921e-06	2.98311e-05
hsa-mir-1265	-3.60728	-0.827966	18.0913	2.10561e-05	9.46173e-05
hsa-mir-1266	-1.97822	4.19414	32.264	1.34582e-08	8.73534e-08
hsa-mir-127	-1.47501	9.78374	41.2219	1.35889e-10	1.07637e-09
hsa-mir-1270	-2.41333	0.190288	20.265	6.74219e-06	3.23718e-05
hsa-mir-1271	-1.69617	1.66543	17.4128	3.0079e-05	0.00013056
hsa-mir-1277	5.57153	1.10801	14.4034	0.000147533	0.000590976
hsa-mir-1287	-1.12456	4.26391	21.3211	3.88433e-06	1.91755e-05
hsa-mir-129-1	-4.9217	1.64854	186.91	1.50268e-42	5.85211e-41
hsa-mir-129-2	-4.8172	1.73483	189.894	3.35287e-43	1.38256e-41
hsa-mir-1292	-1.91868	0.295559	14.0284	0.000180071	0.000707168
hsa-mir-1295a	-4.33445	-0.239534	101.942	5.71813e-24	1.09819e-22
hsa-mir-1296	-3.62212	2.73657	208.394	3.07755e-47	1.59805e-45
hsa-mir-1301	-1.49152	2.89132	25.819	3.74979e-07	2.0862e-06
hsa-mir-1306	-4.1869	3.32683	461.844	1.90781e-102	2.67475e-100
hsa-mir-1307	-2.63248	10.9214	140.373	2.20652e-32	6.18707e-31
hsa-mir-130a	1.21501	5.32829	10.4099	0.0012534	0.00420398
hsa-mir-132	-2.1547	6.52795	119.091	1.00017e-27	2.41765e-26
hsa-mir-133a-1	-4.02401	4.05139	140.708	1.86422e-32	5.33396e-31
hsa-mir-133a-2	-4.20515	3.90317	166.307	4.73963e-38	1.58213e-36
hsa-mir-133b	-2.64712	2.4891	26.154	3.15247e-07	1.775e-06
hsa-mir-1343	-3.93072	0.271063	98.2026	3.777e-23	7.06048e-22
hsa-mir-135b	9.14737	6.73178	68.4231	1.31921e-16	1.5674e-15
hsa-mir-136	4.29112	5.21951	47.385	5.83271e-12	5.07917e-11
hsa-mir-138-1	-1.65461	0.101709	6.12839	0.0133028	0.0370051
hsa-mir-139	-5.28709	5.62763	925.624	2.64019e-203	1.85077e-200
hsa-mir-140	-2.1388	9.46825	137.939	7.51377e-32	2.06555e-30
hsa-mir-141	4.73359	10.9433	110.896	6.23517e-26	1.36589e-24
hsa-mir-142	6.58885	11.5333	78.6301	7.48993e-19	1.08256e-17
hsa-mir-143	2.61777	17.1512	27.8922	1.28267e-07	7.55588e-07
hsa-mir-144	5.35435	6.34014	53.901	2.10851e-13	2.06722e-12
hsa-mir-145	-3.86229	11.716	261.376	8.60131e-59	6.02952e-57
hsa-mir-1468	-2.55697	2.57747	77.0689	1.65094e-18	2.29171e-17
hsa-mir-146a	1.53323	7.97007	11.6946	0.000626815	0.00221918
hsa-mir-147b	1.90844	2.70675	6.78965	0.00916881	0.0260216
hsa-mir-148a	3.41575	16.1091	63.1308	1.93422e-15	2.11858e-14
hsa-mir-149	-4.11707	4.23063	226.63	3.23752e-51	1.74577e-49
hsa-mir-150	-3.85819	9.15155	228.989	9.90447e-52	5.55443e-50
hsa-mir-151a	1.51508	11.3511	28.6338	8.7441e-08	5.23899e-07
hsa-mir-151b	-1.56572	0.65151	12.8023	0.000346187	0.001284
hsa-mir-152	3.27696	7.63447	107.553	3.3684e-25	7.1553e-24
hsa-mir-153-1	5.80222	1.2761	15.0399	0.000105265	0.00043279
hsa-mir-153-2	5.61862	5.57765	42.3458	7.64788e-11	6.16226e-10
hsa-mir-1538	-4.36041	-0.327184	89.9088	2.49395e-21	4.26405e-20
hsa-mir-1539	-3.77689	-0.802027	20.9217	4.78454e-06	2.35366e-05
hsa-mir-15a	3.19813	7.05127	75.9534	2.9044e-18	3.91536e-17
hsa-mir-15b	-2.4097	7.93073	151.984	6.38588e-35	1.98956e-33
hsa-mir-16-1	3.90332	8.54539	64.5719	9.30752e-16	1.05235e-14
hsa-mir-16-2	3.94585	8.56318	66.0888	4.31063e-16	4.99463e-15
hsa-mir-17	2.88758	10.5689	51.0361	9.06846e-13	8.36446e-12
hsa-mir-181a-1	-3.21943	9.10275	309.008	3.59187e-69	2.96224e-67
hsa-mir-181a-2	-2.48679	10.0716	188.893	5.54473e-43	2.22106e-41
hsa-mir-181b-1	-1.23401	6.8062	24.8662	6.14511e-07	3.40531e-06
hsa-mir-181b-2	-1.43336	6.63147	31.7936	1.71458e-08	1.08281e-07
hsa-mir-181d	1.69743	4.33319	11.1628	0.000834553	0.00289615
hsa-mir-182	4.539	14.016	93.0336	5.14152e-22	9.12457e-21
hsa-mir-183	2.52484	13.1003	35.4946	2.55752e-09	1.79282e-08
hsa-mir-185	1.14042	5.86651	18.885	1.38837e-05	6.38195e-05
hsa-mir-186	1.10126	8.22604	15.7752	7.13317e-05	0.000301226
hsa-mir-187	-4.45202	1.48052	70.0402	5.81089e-17	7.02316e-16
hsa-mir-188	2.92289	3.20861	17.8808	2.35182e-05	0.000105008
hsa-mir-18a	1.8885	5.26131	13.5842	0.000228097	0.000880968
hsa-mir-190a	2.66142	2.76045	22.0612	2.6409e-06	1.33666e-05
hsa-mir-191	-1.09604	9.63035	21.8022	3.02255e-06	1.51886e-05
hsa-mir-1914	-2.51776	-0.645916	7.84808	0.00508748	0.0149845
hsa-mir-192	2.68622	16.2598	28.9036	7.60718e-08	4.5971e-07
hsa-mir-193a	-3.30349	7.40118	245.962	1.97169e-55	1.31634e-53
hsa-mir-193b	-3.06864	5.36556	183.16	9.89835e-42	3.65197e-40
hsa-mir-194-1	1.52792	13.1041	24.6069	7.02979e-07	3.82006e-06
hsa-mir-196a-1	1.76765	7.23908	13.3429	0.000259408	0.000990982
hsa-mir-196a-2	2.58018	7.26109	23.5	1.24914e-06	6.58384e-06
hsa-mir-196b	2.18247	11.8908	12.1124	0.000500876	0.00181454
hsa-mir-197	-4.8386	8.66452	887.744	4.53087e-195	2.11743e-192
hsa-mir-1976	-4.26351	3.50219	491.046	8.43728e-109	1.47863e-106
hsa-mir-199a-1	1.86044	10.283	20.8188	5.04862e-06	2.47489e-05
hsa-mir-199a-2	2.19871	11.1268	24.7396	6.5623e-07	3.59388e-06
hsa-mir-199b	2.87383	11.5838	33.6981	6.43621e-09	4.33825e-08
hsa-mir-19a	11.015	6.14562	77.4115	1.38804e-18	1.96568e-17
hsa-mir-19b-1	6.15029	7.16593	95.9733	1.16445e-22	2.12022e-21
hsa-mir-19b-2	6.82638	6.98262	96.5464	8.71774e-23	1.60819e-21
hsa-mir-200c	-2.00664	13.654	78.7415	7.07931e-19	1.03387e-17
hsa-mir-203a	4.21292	14.4577	54.2767	1.74155e-13	1.71947e-12
hsa-mir-203b	5.7128	7.76141	56.4762	5.68824e-14	5.90734e-13
hsa-mir-20a	4.80381	9.19574	79.0713	5.99097e-19	8.93547e-18
hsa-mir-21	5.76946	17.6459	402.917	1.27597e-89	1.37608e-87
hsa-mir-2110	-3.46307	1.74066	190.472	2.50758e-43	1.06534e-41
hsa-mir-2116	-2.97846	0.443015	61.4629	4.51165e-15	4.86564e-14
hsa-mir-214	-1.0185	4.69334	9.91802	0.00163669	0.00533636
hsa-mir-215	4.18226	9.99646	27.6954	1.42001e-07	8.29524e-07
hsa-mir-217	3.52415	5.27755	30.0621	4.18436e-08	2.57301e-07
hsa-mir-218-1	1.25913	3.26868	7.25224	0.00708127	0.0205123
hsa-mir-218-2	2.61709	3.18721	20.5052	5.94698e-06	2.89502e-05
hsa-mir-219a-1	-1.84912	2.29351	33.4078	7.47247e-09	4.9417e-08
hsa-mir-22	1.4402	15.5188	44.637	2.37171e-11	2.00309e-10
hsa-mir-223	2.51364	8.65875	18.8298	1.42913e-05	6.54785e-05
hsa-mir-224	1.86012	6.5159	15.4337	8.54489e-05	0.000358681
hsa-mir-2277	-2.01689	0.564859	18.3702	1.81884e-05	8.25245e-05
hsa-mir-2355	3.97098	5.22062	78.3693	8.54701e-19	1.22275e-17
hsa-mir-24-1	1.80045	9.99718	64.1279	1.16601e-15	1.2872e-14
hsa-mir-24-2	1.92885	10.0084	71.7968	2.38537e-17	2.95955e-16
hsa-mir-2681	-3.09662	-0.831639	10.0853	0.00149454	0.0049889
hsa-mir-26a-1	1.39186	9.72124	33.5867	6.81577e-09	4.55034e-08
hsa-mir-26a-2	1.40229	9.72348	33.4152	7.44409e-09	4.9417e-08
hsa-mir-26b	1.90576	9.37726	34.2793	4.77436e-09	3.27134e-08
hsa-mir-27a	1.97328	10.7766	30.9653	2.62687e-08	1.64414e-07
hsa-mir-28	-1.3865	12.3474	102.522	4.26567e-24	8.30621e-23
hsa-mir-296	-2.62028	2.83921	34.1529	5.09466e-09	3.45059e-08
hsa-mir-29b-1	4.87937	8.85534	86.8438	1.17441e-20	1.91457e-19
hsa-mir-29b-2	2.51843	8.86385	35.0775	3.1684e-09	2.21e-08
hsa-mir-29c	2.31854	10.012	30.4289	3.46336e-08	2.14851e-07
hsa-mir-301a	4.67885	4.07069	33.6185	6.70503e-09	4.49782e-08
hsa-mir-301b	4.03498	1.87663	14.9338	0.00011135	0.000453818
hsa-mir-3074	-2.29656	3.11207	56.0655	7.00971e-14	7.17344e-13
hsa-mir-30b	2.82165	8.50429	42.4829	7.1302e-11	5.77835e-10
hsa-mir-30d	-1.19927	12.4297	32.1846	1.40201e-08	9.0166e-08
hsa-mir-30e	1.67049	13.201	50.6313	1.11451e-12	1.00809e-11
hsa-mir-3117	4.1914	0.192547	6.80202	0.00910548	0.0260162
hsa-mir-3127	-3.37536	3.17769	186.57	1.78223e-42	6.7532e-41
hsa-mir-3130-1	-1.53004	2.19746	13.9411	0.000188625	0.000735425
hsa-mir-3130-2	-1.71958	2.18368	17.8364	2.40734e-05	0.000106806
hsa-mir-3138	-3.46576	-0.489268	28.3616	1.00643e-07	5.97889e-07
hsa-mir-3150b	-3.34248	2.21637	64.2643	1.08802e-15	1.21064e-14
hsa-mir-3154	-3.44899	-0.59623	24.5448	7.26021e-07	3.93005e-06
hsa-mir-3155a	-2.03068	-0.449934	6.80089	0.00911125	0.0260162
hsa-mir-3157	-2.04699	-0.0514051	12.2024	0.000477286	0.00174259
hsa-mir-3158-1	-2.21322	-0.218866	11.6989	0.000625377	0.00221918
hsa-mir-3162	-4.08909	-0.808061	28.1964	1.0961e-07	6.48413e-07
hsa-mir-3173	-4.01495	0.348026	126.747	2.10986e-29	5.1895e-28
hsa-mir-3177	-2.65186	-0.60552	10.4884	0.00120129	0.00404858
hsa-mir-3183	-3.05819	-0.625195	15.0015	0.000107427	0.000440389
hsa-mir-3188	-3.15696	-0.401736	27.447	1.61457e-07	9.39263e-07
hsa-mir-3189	4.14335	0.175626	6.0166	0.0141719	0.0390355
hsa-mir-3191	-2.19827	-0.343752	9.97857	0.00158373	0.00523677
hsa-mir-3193	-1.50751	0.231913	5.88757	0.0152482	0.0417765
hsa-mir-3199-2	-2.38985	0.015799	23.9906	9.68095e-07	5.18041e-06
hsa-mir-32	3.14985	5.27193	48.1474	3.95349e-12	3.48603e-11
hsa-mir-3200	-1.27092	2.409	8.28763	0.00399161	0.0119578
hsa-mir-320a	-1.70988	8.8637	34.2756	4.78334e-09	3.27134e-08
hsa-mir-320c-1	-2.77037	0.108582	37.9791	7.1505e-10	5.24741e-09
hsa-mir-320c-2	-1.92809	-0.154032	8.81506	0.00298754	0.00918538
hsa-mir-323a	-1.87202	2.24899	29.1046	6.8573e-08	4.17997e-07
hsa-mir-324	-2.52768	5.23154	145.484	1.68301e-33	5.12951e-32
hsa-mir-326	-3.65652	2.53186	196.931	9.76395e-45	4.41582e-43
hsa-mir-328	-5.36433	4.83545	1072.95	2.50422e-235	3.51092e-232
hsa-mir-330	-1.1749	4.80804	15.4234	8.59169e-05	0.000359569
hsa-mir-331	-1.65851	4.91954	32.0141	1.53059e-08	9.75405e-08
hsa-mir-335	4.52671	7.85728	92.7958	5.79794e-22	1.01609e-20
hsa-mir-337	2.46966	4.75042	34.7594	3.73071e-09	2.58933e-08
hsa-mir-338	2.21584	9.06665	15.3044	9.15029e-05	0.000380674
hsa-mir-339	-1.9326	5.70437	39.989	2.55399e-10	1.95666e-09
hsa-mir-33a	2.63951	6.12189	17.0953	3.55508e-05	0.000153361
hsa-mir-33b	2.88999	3.08451	13.1705	0.00028439	0.00107671
hsa-mir-340	2.31176	4.25944	38.589	5.23131e-10	3.90122e-09
hsa-mir-342	-1.87303	6.39433	44.0898	3.13656e-11	2.63321e-10
hsa-mir-346	-4.36085	-0.606009	51.5144	7.10737e-13	6.68761e-12
hsa-mir-34a	1.66031	6.93129	22.3572	2.26368e-06	1.16252e-05
hsa-mir-3605	-2.91925	1.93987	74.5346	5.95839e-18	7.73488e-17
hsa-mir-3609	-1.83675	0.281923	7.21925	0.00721259	0.0208496
hsa-mir-361	-1.70508	8.25233	68.0428	1.59988e-16	1.88489e-15
hsa-mir-3613	3.49651	4.04173	36.3728	1.62959e-09	1.15388e-08
hsa-mir-3614	-2.16773	2.27021	40.2105	2.28018e-10	1.75649e-09
hsa-mir-3615	-3.51912	2.69346	180.145	4.5052e-41	1.57907e-39
hsa-mir-3620	-4.31944	-0.578955	56.3431	6.08666e-14	6.27463e-13
hsa-mir-3622a	-6.49565	-0.559371	198.46	4.52858e-45	2.18934e-43
hsa-mir-3651	-1.56153	1.9074	8.49984	0.00355178	0.0107319
hsa-mir-3652	-1.4414	1.61767	8.64175	0.00328545	0.0100208
hsa-mir-3653	-1.95386	3.60455	22.3075	2.32297e-06	1.18e-05
hsa-mir-3656	-3.72296	-0.784118	20.1052	7.32983e-06	3.49538e-05
hsa-mir-365a	-1.23293	4.8767	19.2376	1.15419e-05	5.37597e-05
hsa-mir-365b	-1.19777	4.87148	17.7124	2.56946e-05	0.000112927
hsa-mir-3662	4.95955	0.662149	9.47248	0.00208577	0.00667637
hsa-mir-3677	2.34546	3.45816	16.8567	4.03103e-05	0.000172829
hsa-mir-3678	-1.9722	-0.29857	8.40164	0.00374882	0.0112786
hsa-mir-3682	4.86962	0.606268	10.8173	0.00100557	0.0034554
hsa-mir-369	3.19285	3.77013	37.9694	7.18619e-10	5.24741e-09
hsa-mir-3690-1	-2.92631	0.0645325	36.884	1.25367e-09	8.96761e-09
hsa-mir-370	-2.06341	3.30235	68.5088	1.26315e-16	1.51362e-15
hsa-mir-374a	7.4931	9.93766	181.611	2.15617e-41	7.75117e-40
hsa-mir-374b	3.76329	6.24658	93.3604	4.35891e-22	7.83485e-21
hsa-mir-374c	5.82456	1.17907	5.84626	0.0156102	0.0425788
hsa-mir-375	-3.12433	14.9863	112.359	2.98067e-26	6.63317e-25
hsa-mir-376a-1	5.68744	1.19566	16.4484	4.99927e-05	0.000213039
hsa-mir-376a-2	4.66961	0.476756	8.85468	0.00292339	0.0090079
hsa-mir-376b	3.3992	1.32154	12.154	0.000489815	0.00178369
hsa-mir-376c	5.04615	2.74213	34.7357	3.77641e-09	2.60814e-08
hsa-mir-377	-1.34675	2.18281	14.3772	0.000149601	0.000597553
hsa-mir-378a	-2.86706	10.6359	234.987	4.87395e-53	3.10603e-51
hsa-mir-379	3.96188	9.62464	103.371	2.77937e-24	5.56667e-23
hsa-mir-380	4.6721	0.442742	9.41366	0.00215374	0.00686261
hsa-mir-383	-2.24888	0.412921	10.5677	0.00115083	0.0039067
hsa-mir-3909	-1.9571	-0.046544	11.618	0.000653172	0.00230667
hsa-mir-3912	3.91182	0.0284223	5.88384	0.0152805	0.0417765
hsa-mir-3913-1	2.3617	0.569774	5.97716	0.0144923	0.0398397
hsa-mir-3914-1	-2.99384	-0.819866	8.32633	0.00390746	0.0117307
hsa-mir-3917	-3.58942	1.3106	135.576	2.4698e-31	6.65895e-30
hsa-mir-3928	-3.06995	1.1456	75.6311	3.41936e-18	4.52259e-17
hsa-mir-3934	-1.34147	1.78473	12.6426	0.000377053	0.00138748
hsa-mir-3940	-3.59866	1.46903	118.92	1.09024e-27	2.59071e-26
hsa-mir-3944	-3.46849	-0.136285	47.6898	4.99295e-12	4.37507e-11
hsa-mir-411	4.12318	3.15568	37.8545	7.62218e-10	5.5084e-09
hsa-mir-421	3.43012	2.52595	23.6682	1.14459e-06	6.07849e-06
hsa-mir-423	-3.04524	7.29894	348.691	8.17011e-78	7.63633e-76
hsa-mir-424	4.99375	7.25203	72.5011	1.66937e-17	2.12768e-16
hsa-mir-429	3.36763	8.79026	53.6244	2.42732e-13	2.36326e-12
hsa-mir-431	-1.79806	3.5634	43.9157	3.42828e-11	2.86098e-10
hsa-mir-432	-2.51146	2.78241	85.3361	2.51729e-20	4.05659e-19
hsa-mir-4326	-2.09552	3.07417	21.5428	3.46013e-06	1.72025e-05
hsa-mir-433	-3.57404	1.06875	141.28	1.39754e-32	4.08199e-31
hsa-mir-4420	-3.37733	-0.815293	14.6019	0.000132777	0.000534925
hsa-mir-4422	-3.77903	-0.806585	19.8102	8.5525e-06	4.06461e-05
hsa-mir-4433a	-3.59096	-0.685423	16.6307	4.54093e-05	0.000194097
hsa-mir-4433b	-3.55116	-0.608625	21.6779	3.22486e-06	1.60898e-05
hsa-mir-4436b-1	-4.76735	-0.78432	46.7905	7.89967e-12	6.79468e-11
hsa-mir-4436b-2	-3.93257	-0.78455	24.8281	6.26762e-07	3.45953e-06
hsa-mir-4437	-3.63452	-0.832855	20.3726	6.37361e-06	3.08131e-05
hsa-mir-4442	-1.76046	0.00355586	7.67117	0.00561101	0.0163888
hsa-mir-4444-1	4.32638	0.314928	7.15147	0.00749024	0.0216076
hsa-mir-4444-2	4.92911	0.683852	10.547	0.00116377	0.00394109
hsa-mir-4446	-1.82802	-0.0335795	5.58126	0.0181536	0.0487141
hsa-mir-4449	-1.41952	1.55708	6.10819	0.0134557	0.0373561
hsa-mir-4453	-1.88621	-0.108377	8.61851	0.00332763	0.01012
hsa-mir-4469	-2.36959	-0.697368	6.18144	0.0129097	0.0360547
hsa-mir-4479	-2.86434	-0.512906	17.6571	2.6453e-05	0.000115536
hsa-mir-450a-1	6.5709	1.90901	26.8662	2.18034e-07	1.23758e-06
hsa-mir-450a-2	6.59072	1.92863	27.8101	1.33824e-07	7.85025e-07
hsa-mir-450b	8.14796	3.34815	54.8403	1.30732e-13	1.2999e-12
hsa-mir-4512	-3.39624	-0.806696	14.6401	0.000130117	0.000525718
hsa-mir-451a	2.60304	8.38644	17.8393	2.40373e-05	0.000106806
hsa-mir-452	4.45638	6.92484	79.025	6.13291e-19	9.05088e-18
hsa-mir-4521	-1.61182	0.514342	6.93114	0.00847076	0.0243361
hsa-mir-4524a	-4.86751	-0.734869	53.0633	3.22965e-13	3.10135e-12
hsa-mir-4525	-2.29958	-0.524843	7.27881	0.00697727	0.0202529
hsa-mir-4537	-2.34633	-0.845273	6.03468	0.0140275	0.03879
hsa-mir-454	5.53508	3.21888	55.3588	1.00422e-13	1.02022e-12
hsa-mir-4632	-4.39734	-0.510475	72.0999	2.0457e-17	2.58385e-16
hsa-mir-4634	-4.42333	-0.831608	40.9764	1.54077e-10	1.20679e-09
hsa-mir-4638	-1.97959	0.470549	15.3267	9.04273e-05	0.000377319
hsa-mir-4640	-2.4601	-0.393895	13.56	0.000231053	0.000889936
hsa-mir-4646	-3.30867	-0.710707	14.9685	0.00010932	0.000446843
hsa-mir-4651	-3.7738	-0.732773	24.7881	6.39924e-07	3.51833e-06
hsa-mir-4658	-2.76496	-0.642117	9.82487	0.00172168	0.00560046
hsa-mir-4660	-2.21551	-0.151835	12.9552	0.000319032	0.00118958
hsa-mir-4662a	3.09927	3.57541	16.4109	5.09912e-05	0.000216635
hsa-mir-4665	-2.45494	-0.369972	11.1791	0.00082724	0.00287789
hsa-mir-4667	-3.02496	-0.720994	11.818	0.000586605	0.00209267
hsa-mir-4668	6.32513	1.71018	20.1917	7.00546e-06	3.3521e-05
hsa-mir-4674	-2.20458	-0.559089	6.24196	0.0124758	0.0349124
hsa-mir-4676	-3.21465	0.605648	82.1906	1.23574e-19	1.925e-18
hsa-mir-4677	3.83635	2.94611	39.2995	3.63534e-10	2.74018e-09
hsa-mir-4682	-3.10405	-0.834863	12.1488	0.000491186	0.00178405
hsa-mir-4683	-2.70932	-0.622706	11.085	0.000870291	0.00301271
hsa-mir-4685	-3.27016	-0.266948	36.228	1.75532e-09	1.23666e-08
hsa-mir-4689	-2.73973	-0.786307	5.67234	0.0172345	0.0465563
hsa-mir-4700	-2.78041	-0.680854	9.3205	0.00226605	0.00718593
hsa-mir-4701	-2.78031	-0.756207	8.60843	0.00334611	0.0101446
hsa-mir-4707	-2.40409	-0.0985098	15.1517	9.92069e-05	0.000411503
hsa-mir-4710	-2.51018	-0.776474	5.58776	0.0180864	0.0487141
hsa-mir-4716	-2.68866	-0.798208	6.29004	0.0121418	0.0340457
hsa-mir-4717	-2.88012	-0.638572	12.8327	0.00034062	0.00126671
hsa-mir-4723	-2.95158	-0.763722	9.96303	0.00159715	0.00525634
hsa-mir-4725	-2.57411	-0.730631	6.79074	0.00916318	0.0260216
hsa-mir-4728	-3.65076	1.08294	70.2788	5.14887e-17	6.27714e-16
hsa-mir-4731	-3.18764	-0.793399	11.759	0.000605482	0.00215453
hsa-mir-4732	-4.73058	-0.278344	76.114	2.6775e-18	3.64452e-17
hsa-mir-4738	-2.50304	-0.40536	13.6213	0.000223634	0.00086612
hsa-mir-4739	-2.65604	-0.737036	6.97382	0.00827109	0.0238112
hsa-mir-4740	-2.76843	-0.753987	8.03061	0.00459932	0.0136616
hsa-mir-4745	-2.42874	-0.457314	9.66818	0.00187487	0.0060427
hsa-mir-4746	-2.22408	2.05021	43.0448	5.34996e-11	4.36084e-10
hsa-mir-4749	-3.03644	-0.667177	13.3232	0.000262141	0.000998702
hsa-mir-4754	-4.28183	-0.553846	60.0019	9.47655e-15	1.00652e-13
hsa-mir-4757	-3.23906	-0.746358	14.194	0.000164896	0.000654913
hsa-mir-4758	-2.68128	-0.614016	9.56227	0.00198617	0.00638672
hsa-mir-4763	-2.84476	-0.706292	10.0004	0.00156507	0.00518729
hsa-mir-4766	4.15175	0.183002	5.88317	0.0152862	0.0417765
hsa-mir-4767	-3.21977	-0.793744	12.5114	0.000404477	0.00148449
hsa-mir-4768	-2.84461	-0.575601	13.0461	0.00030391	0.00113926
hsa-mir-4787	-3.03233	-0.190952	23.7844	1.07754e-06	5.74417e-06
hsa-mir-4791	5.41989	0.984757	11.9027	0.000560515	0.00202016
hsa-mir-4799	-3.89246	-0.786238	22.3373	2.28725e-06	1.16608e-05
hsa-mir-4800	-3.92247	-0.700986	27.1649	1.86824e-07	1.07347e-06
hsa-mir-484	-2.65822	5.91813	163.326	2.12378e-37	6.92452e-36
hsa-mir-485	-3.24831	2.08369	134.379	4.51515e-31	1.19438e-29
hsa-mir-486-1	-5.51108	6.24885	452.211	2.38196e-100	3.03592e-98
hsa-mir-486-2	-5.55519	6.26442	471.338	1.63895e-104	2.55313e-102
hsa-mir-487a	-2.55014	1.04521	53.4822	2.60949e-13	2.52311e-12
hsa-mir-490	-4.55462	2.49189	50.7142	1.06844e-12	9.72697e-12
hsa-mir-491	-1.2183	1.78785	10.7245	0.00105726	0.00362417
hsa-mir-493	1.08232	3.88024	9.7445	0.0017986	0.00582365
hsa-mir-494	3.23545	1.18336	11.5793	0.00066691	0.00234338
hsa-mir-495	3.34906	2.86019	33.0242	9.10177e-09	5.96294e-08
hsa-mir-496	2.93508	1.6639	14.2819	0.000157369	0.000626792
hsa-mir-497	-1.01699	3.74756	11.8646	0.000572097	0.00205662
hsa-mir-499a	5.73684	1.20916	9.92953	0.00162648	0.00532785
hsa-mir-5000	3.32393	1.29547	13.167	0.000284922	0.00107671
hsa-mir-5001	-2.22699	0.437167	26.0103	3.39607e-07	1.90452e-06
hsa-mir-5008	-3.4345	-0.783299	12.734	0.00035906	0.00132474
hsa-mir-501	-1.81751	6.02878	39.4627	3.34382e-10	2.54784e-09
hsa-mir-5010	-3.04294	0.466706	62.694	2.41453e-15	2.62416e-14
hsa-mir-504	-6.19769	0.693729	407.72	1.14954e-90	1.34305e-88
hsa-mir-505	-1.66748	5.92557	51.3147	7.86853e-13	7.35445e-12
hsa-mir-508	3.80301	5.14581	8.69018	0.00319929	0.00979347
hsa-mir-5090	-3.98932	-0.427578	55.3032	1.03301e-13	1.04193e-12
hsa-mir-5091	-2.49861	0.462602	32.4839	1.20184e-08	7.83711e-08
hsa-mir-514a-1	6.80217	2.03301	9.07123	0.00259663	0.00810795
hsa-mir-514a-2	6.9043	2.12096	8.9106	0.0028352	0.00875539
hsa-mir-514a-3	6.88683	2.10431	9.02888	0.00265747	0.0082795
hsa-mir-5187	-3.65953	-0.118314	75.3972	3.84926e-18	5.04361e-17
hsa-mir-5193	-3.39418	-0.61427	24.629	6.94978e-07	3.79128e-06
hsa-mir-542	5.28842	7.32657	129.641	4.91028e-30	1.25167e-28
hsa-mir-543	-1.12803	1.00566	6.75398	0.00935387	0.0264932
hsa-mir-545	4.46419	0.375293	7.71628	0.0054725	0.0160511
hsa-mir-548f-1	5.23046	0.846657	8.60621	0.00335019	0.0101446
hsa-mir-549a	5.55735	1.09261	14.0864	0.000174598	0.000689538
hsa-mir-550a-3	-1.07734	1.14676	5.80296	0.0159992	0.0435551
hsa-mir-550b-1	-3.02715	-0.769736	10.3938	0.00126439	0.00423073
hsa-mir-550b-2	-2.91032	-0.815372	8.95591	0.00276574	0.00857868
hsa-mir-552	4.67974	7.68123	37.14	1.09947e-09	7.90491e-09
hsa-mir-556	5.43545	1.0063	13.0901	0.000296861	0.00111882
hsa-mir-5571	-2.02157	-0.353906	6.84107	0.00890854	0.0255415
hsa-mir-5586	5.38972	0.959389	15.1422	9.97085e-05	0.000412364
hsa-mir-559	4.54741	0.402241	7.98446	0.00471806	0.0139551
hsa-mir-561	4.15194	0.172752	5.68795	0.0170818	0.0463126
hsa-mir-5683	6.26322	1.67372	10.0404	0.00153141	0.00508776
hsa-mir-5698	-2.8419	0.0798546	31.7815	1.72528e-08	1.08468e-07
hsa-mir-570	4.87082	0.605845	9.76066	0.00178286	0.00578604
hsa-mir-572	-2.93387	-0.698641	10.6593	0.00109521	0.00373596
hsa-mir-574	-3.64324	6.20672	301.46	1.58379e-67	1.23359e-65
hsa-mir-576	1.32709	3.74037	8.64042	0.00328785	0.0100208
hsa-mir-577	7.37077	6.97983	41.0843	1.45804e-10	1.14841e-09
hsa-mir-580	4.35108	0.284557	7.33082	0.00677823	0.0197159
hsa-mir-582	5.07389	8.72092	87.6064	7.98646e-21	1.3173e-19
hsa-mir-584	1.77739	8.46176	13.3429	0.000259408	0.000990982
hsa-mir-589	-2.44623	5.94785	198.334	4.82449e-45	2.25465e-43
hsa-mir-590	7.26833	4.87116	71.9621	2.19372e-17	2.74607e-16
hsa-mir-592	10.2854	5.42253	41.7156	1.05565e-10	8.45726e-10
hsa-mir-598	2.86798	3.88122	23.1948	1.46392e-06	7.62977e-06
hsa-mir-605	-3.94201	0.263027	105.2	1.1043e-24	2.31079e-23
hsa-mir-611	-2.69233	-0.732842	7.48054	0.00623692	0.0181791
hsa-mir-6125	-3.52267	0.0265861	59.6924	1.10906e-14	1.1691e-13
hsa-mir-615	-3.75425	1.44962	37.8858	7.50083e-10	5.44879e-09
hsa-mir-627	2.47109	1.69398	9.96954	0.00159151	0.00525012
hsa-mir-628	5.16241	4.57994	32.2009	1.39029e-08	8.9824e-08
hsa-mir-632	-2.7242	0.0761318	32.1299	1.44203e-08	9.23165e-08
hsa-mir-639	-1.65296	0.453851	9.41611	0.00215088	0.00686261
hsa-mir-642a	-4.35912	2.6402	194.916	2.68691e-44	1.1772e-42
hsa-mir-642b	-2.95862	-0.753836	9.24739	0.00235831	0.00743001
hsa-mir-643	4.6501	0.492149	9.31683	0.00227059	0.00718593
hsa-mir-6501	-2.73504	-0.348129	17.9621	2.25344e-05	0.000100937
hsa-mir-6507	-3.69637	-0.422371	38.0629	6.84996e-10	5.05455e-09
hsa-mir-6509	-2.50743	0.160967	27.0816	1.95048e-07	1.11615e-06
hsa-mir-651	3.44189	2.06352	17.745	2.5258e-05	0.000111358
hsa-mir-6511b-1	-5.1115	0.617331	337.471	2.26827e-75	1.98758e-73
hsa-mir-6511b-2	-5.2015	0.665667	371	1.13334e-82	1.13496e-80
hsa-mir-6516	4.05253	0.144304	6.02574	0.0140987	0.0389103
hsa-mir-652	-2.02655	5.01878	84.0514	4.82088e-20	7.68054e-19
hsa-mir-653	8.05884	3.25061	27.3747	1.67613e-07	9.71046e-07
hsa-mir-655	3.45658	1.34275	14.0118	0.000181665	0.000711435
hsa-mir-656	4.40383	0.32046	7.67918	0.00558616	0.0163503
hsa-mir-658	-2.58067	-0.155838	19.0233	1.29129e-05	5.95521e-05
hsa-mir-660	3.74015	5.76731	52.8428	3.61334e-13	3.44619e-12
hsa-mir-664a	-1.34562	4.13604	27.2767	1.7632e-07	1.01728e-06
hsa-mir-664b	-1.96316	1.77035	36.5269	1.50575e-09	1.07161e-08
hsa-mir-668	-2.67902	-0.678079	8.73432	0.00312275	0.00958009
hsa-mir-671	-2.73761	3.07441	161.567	5.14477e-37	1.63931e-35
hsa-mir-6715b	-2.60742	0.949839	28.3764	9.98762e-08	5.95857e-07
hsa-mir-6716	-2.83749	0.130116	41.5546	1.14624e-10	9.13083e-10
hsa-mir-6720	-4.22061	0.155973	133.114	8.53585e-31	2.21616e-29
hsa-mir-6721	-3.29176	-0.753833	14.1524	0.000168586	0.000667678
hsa-mir-6726	-4.28464	-0.55482	55.0838	1.15498e-13	1.15663e-12
hsa-mir-6727	-2.8848	-0.692092	10.6152	0.00112161	0.00381672
hsa-mir-6730	-3.24837	-0.531925	21.3685	3.78955e-06	1.87737e-05
hsa-mir-6731	-2.22003	-0.674739	5.57947	0.0181722	0.0487141
hsa-mir-6734	-2.83187	-0.390711	19.7819	8.68004e-06	4.10587e-05
hsa-mir-6736	-2.69254	-0.785273	6.06611	0.01378	0.038181
hsa-mir-6738	-3.65793	-0.770814	19.0447	1.27694e-05	5.90848e-05
hsa-mir-6741	-3.25704	-0.659877	16.8686	4.00598e-05	0.000172282
hsa-mir-6743	-3.16776	-0.736436	12.738	0.000358305	0.00132474
hsa-mir-6746	-2.50139	-0.773263	5.68493	0.0171112	0.0463126
hsa-mir-6747	-2.42172	-0.547539	9.1853	0.00243967	0.00765195
hsa-mir-6748	-2.87399	-0.601844	13.6521	0.000219998	0.000854395
hsa-mir-6749	-4.4169	-0.711629	46.7206	8.18635e-12	6.99833e-11
hsa-mir-6750	-3.37073	-0.589163	22.424	2.18622e-06	1.12687e-05
hsa-mir-6751	-2.88359	-0.693439	10.419	0.00124722	0.0041933
hsa-mir-6756	-4.48022	-0.78747	39.3526	3.53777e-10	2.68105e-09
hsa-mir-6762	-3.79319	-0.721164	25.8261	3.73604e-07	2.0862e-06
hsa-mir-6763	-2.27721	-0.602295	6.49863	0.0107958	0.030454
hsa-mir-6766	-3.01269	-0.713694	11.6007	0.000659272	0.00232236
hsa-mir-6769a	-3.50968	-0.645106	22.0166	2.70304e-06	1.36319e-05
hsa-mir-6769b	-3.81362	-0.739493	23.6141	1.17722e-06	6.22815e-06
hsa-mir-6776	-3.28009	-0.745907	13.939	0.00018884	0.000735425
hsa-mir-6777	-3.11411	-0.430825	23.2168	1.44731e-06	7.57137e-06
hsa-mir-6779	-2.92846	-0.646194	12.2027	0.000477197	0.00174259
hsa-mir-6782	-2.98929	-0.765645	9.70452	0.00183815	0.005938
hsa-mir-6783	-1.61809	-0.00597057	6.43499	0.0111894	0.0314378
hsa-mir-6784	-3.83271	-0.721868	27.0276	2.00566e-07	1.14306e-06
hsa-mir-6785	-3.3949	-0.77179	14.7257	0.000124337	0.000505276
hsa-mir-6786	-3.00107	-0.771134	10.0763	0.00150187	0.00500147
hsa-mir-6787	-2.93064	-0.763093	9.19367	0.00242853	0.00763408
hsa-mir-6788	-4.15541	-0.728998	34.1656	5.06157e-09	3.44482e-08
hsa-mir-6790	-3.12816	-0.833233	11.4561	0.00071259	0.00249763
hsa-mir-6793	-3.67227	-0.060599	71.558	2.69232e-17	3.31108e-16
hsa-mir-6796	-3.97796	-0.779288	23.2618	1.41379e-06	7.42371e-06
hsa-mir-6797	-2.17592	-0.40132	8.00813	0.00465679	0.013803
hsa-mir-6798	-2.76547	-0.17482	22.4852	2.11774e-06	1.0956e-05
hsa-mir-6801	-3.75378	-0.766806	19.3621	1.0813e-05	5.05325e-05
hsa-mir-6802	-3.38976	-0.208828	49.4238	2.06227e-12	1.84159e-11
hsa-mir-6803	-4.48173	-0.322135	113.122	2.02876e-26	4.66283e-25
hsa-mir-6808	-3.68809	-0.133852	61.1	5.42483e-15	5.80581e-14
hsa-mir-6810	-4.04937	-0.528289	45.266	1.72005e-11	1.46153e-10
hsa-mir-6812	-4.24172	-0.64007	43.0606	5.30713e-11	4.35123e-10
hsa-mir-6813	-2.77463	-0.738379	8.15832	0.0042864	0.0128135
hsa-mir-6816	-2.92362	-0.805799	8.41805	0.00371515	0.0112014
hsa-mir-6820	-2.52809	-0.0896799	18.8108	1.44347e-05	6.59201e-05
hsa-mir-6821	-2.73778	-0.593098	9.27965	0.00231714	0.00731672
hsa-mir-6822	-3.03423	-0.769349	10.6947	0.00107442	0.003674
hsa-mir-6824	-2.89231	-0.584214	14.5249	0.000138317	0.000555647
hsa-mir-6825	-2.83826	-0.753258	8.98297	0.00272507	0.00847129
hsa-mir-6826	-3.24779	-0.762582	13.0196	0.000308251	0.00115245
hsa-mir-6833	-3.85403	-0.478746	50.2589	1.34743e-12	1.21096e-11
hsa-mir-6836	-3.0057	-0.775801	9.95705	0.00160234	0.00526109
hsa-mir-6837	-1.22977	0.553165	6.7967	0.00913266	0.0260216
hsa-mir-6842	-2.66117	1.86385	77.0262	1.68705e-18	2.31887e-17
hsa-mir-6845	-3.24161	-0.799767	11.8472	0.00057749	0.00207069
hsa-mir-6851	-3.32547	-0.610126	20.3093	6.5881e-06	3.17406e-05
hsa-mir-6852	-2.03448	-0.223474	9.92459	0.00163085	0.00532973
hsa-mir-6853	-4.07294	-0.728342	30.3368	3.63162e-08	2.24296e-07
hsa-mir-6871	-3.39877	-0.690121	17.6325	2.67976e-05	0.000116678
hsa-mir-6877	-2.81813	-0.21305	26.5233	2.6038e-07	1.47199e-06
hsa-mir-6879	-4.02539	-0.507847	52.0583	5.38777e-13	5.10382e-12
hsa-mir-6880	-3.28381	-0.797102	13.2756	0.00026889	0.00102164
hsa-mir-6885	-2.72707	-0.614749	10.905	0.000959065	0.00330371
hsa-mir-6887	-4.69136	-0.535937	75.8675	3.03354e-18	4.0505e-17
hsa-mir-6891	-2.78094	-0.382904	13.4562	0.000244192	0.000937964
hsa-mir-6892	-2.9192	1.38719	103.904	2.12336e-24	4.31441e-23
hsa-mir-6894	-3.17826	-0.559229	20.6914	5.39569e-06	2.63581e-05
hsa-mir-6895	-3.20145	-0.614708	14.6642	0.00012846	0.000520524
hsa-mir-7-1	2.75377	5.94401	40.3629	2.10913e-10	1.6337e-09
hsa-mir-7-2	7.11795	2.39198	28.6704	8.58063e-08	5.16311e-07
hsa-mir-7-3	3.73542	2.3804	18.4004	1.79016e-05	8.14872e-05
hsa-mir-708	5.26112	5.91801	83.0538	7.9849e-20	1.25785e-18
hsa-mir-7110	-3.69407	-0.574606	31.9066	1.61769e-08	1.02624e-07
hsa-mir-7113	-2.80281	-0.742352	7.88531	0.00498379	0.01471
hsa-mir-7114	-3.06048	-0.608647	14.0692	0.000176204	0.000693927
hsa-mir-7151	-3.77641	-0.777296	21.7313	3.13638e-06	1.57043e-05
hsa-mir-7155	-3.63667	-0.23239	50.7918	1.02703e-12	9.41106e-12
hsa-mir-744	-2.34399	5.57276	89.4466	3.15034e-21	5.32142e-20
hsa-mir-760	-2.83544	0.831992	43.715	3.79851e-11	3.15119e-10
hsa-mir-7641-1	-3.58116	0.600739	33.1834	8.38629e-09	5.51999e-08
hsa-mir-7641-2	-4.72428	-0.222394	66.6401	3.25896e-16	3.80755e-15
hsa-mir-766	-4.42585	3.20043	557.031	3.72035e-123	8.69321e-121
hsa-mir-7702	-4.36479	0.954184	113.6	1.59414e-26	3.72498e-25
hsa-mir-7705	5.06771	0.734764	11.2151	0.000811324	0.00282954
hsa-mir-7706	-3.20378	1.62996	142.821	6.43235e-33	1.91876e-31
hsa-mir-7845	-3.26568	-0.54935	23.1679	1.48453e-06	7.70858e-06
hsa-mir-7846	-2.74637	-0.284106	19.4578	1.02846e-05	4.82241e-05
hsa-mir-7854	-2.41497	-0.0338518	19.778	8.69788e-06	4.10587e-05
hsa-mir-874	-2.69774	4.50657	113.03	2.1255e-26	4.80638e-25
hsa-mir-877	-2.00409	1.66982	22.3437	2.27955e-06	1.16608e-05
hsa-mir-885	-5.3156	-0.455819	90.1745	2.18057e-21	3.77427e-20
hsa-mir-887	-2.18685	1.5602	46.9357	7.33545e-12	6.34833e-11
hsa-mir-889	5.51782	4.03048	79.4979	4.82749e-19	7.27757e-18
hsa-mir-891a	-1.8941	1.16342	8.91378	0.00283027	0.00875539
hsa-mir-92a-1	-2.2275	13.4443	81.9873	1.36966e-19	2.11018e-18
hsa-mir-92a-2	-2.19083	13.331	79.7031	4.35122e-19	6.63088e-18
hsa-mir-92b	-3.17618	6.33177	176.813	2.40629e-40	8.22832e-39
hsa-mir-937	-2.46702	1.94704	40.7539	1.72659e-10	1.34482e-09
hsa-mir-939	-1.4019	1.11116	11.8417	0.000579197	0.00207151
hsa-mir-940	-1.69002	2.12717	17.6636	2.63619e-05	0.000115498
hsa-mir-95	2.46588	4.10981	19.4796	1.01682e-05	4.78384e-05
hsa-mir-96	4.70165	4.41229	57.8967	2.76247e-14	2.89029e-13
hsa-mir-98	3.89858	5.74538	107.762	3.03058e-25	6.53674e-24
hsa-mir-99b	-3.06493	14.0113	270.684	8.05021e-61	5.9402e-59

## Sheet: ESCA
miRNA	logFC	logCPM	LR	PValue	FDR
hsa-mir-1-1	-1.83377	5.02009	19.6257	9.41934e-06	0.000200161
hsa-mir-1-2	-1.86516	5.11732	20.9883	4.62088e-06	0.000114262
hsa-mir-105-1	7.23333	5.3477	20.9223	4.78301e-06	0.000116159
hsa-mir-105-2	7.70073	5.34132	22.2171	2.43501e-06	6.75839e-05
hsa-mir-106b	1.70704	9.55055	30.8013	2.85842e-08	3.23954e-06
hsa-mir-1180	1.95789	4.34228	24.2993	8.24695e-07	3.03131e-05
hsa-mir-1228	1.72117	0.512958	14.4246	0.000145886	0.00185425
hsa-mir-1245a	1.32156	1.67015	9.17863	0.00244857	0.0162442
hsa-mir-1248	1.62614	2.44521	8.64218	0.00328469	0.0198541
hsa-mir-1249	1.26041	1.39453	11.3546	0.000752603	0.00645473
hsa-mir-1254-1	1.79305	0.302209	9.84118	0.00170648	0.01224
hsa-mir-1258	-1.29788	0.153075	8.75118	0.00309401	0.0190401
hsa-mir-1265	-1.91909	-1.03483	13.6279	0.00022285	0.00259039
hsa-mir-1269a	4.55662	6.83709	10.6446	0.00110393	0.00872876
hsa-mir-1271	1.23843	1.40591	11.8426	0.000578914	0.00531975
hsa-mir-129-2	-1.46169	2.1309	9.08371	0.00257897	0.0168907
hsa-mir-1292	1.14913	0.300909	7.87558	0.00501067	0.0278143
hsa-mir-1293	3.29624	2.46565	13.5199	0.000236052	0.00269774
hsa-mir-1296	1.22127	2.87116	11.1707	0.000831014	0.00693361
hsa-mir-1301	1.57505	3.44066	19.0741	1.25737e-05	0.000240848
hsa-mir-1304	2.73379	1.35544	19.3769	1.07294e-05	0.000217791
hsa-mir-1307	1.2483	10.8027	18.7506	1.48979e-05	0.0002738
hsa-mir-133a-1	-2.32811	4.588	33.5735	6.8622e-09	9.33259e-07
hsa-mir-133a-2	-2.36719	4.51362	35.8304	2.15267e-09	4.18232e-07
hsa-mir-133b	-1.60073	2.16873	10.6604	0.00109454	0.00870514
hsa-mir-135a-1	-2.55895	0.538323	24.9054	6.02123e-07	2.60486e-05
hsa-mir-135a-2	-2.62987	0.679803	29.431	5.79446e-08	4.92529e-06
hsa-mir-135b	2.34969	6.06854	19.4581	1.02833e-05	0.000213606
hsa-mir-139	-1.47679	5.87372	44.7221	2.27081e-11	6.1766e-09
hsa-mir-142	1.0758	10.4504	9.43229	0.00213198	0.0144254
hsa-mir-145	-1.38999	11.7353	18.4908	1.70725e-05	0.000305508
hsa-mir-1468	-1.45475	2.56531	16.8468	4.05208e-05	0.000640795
hsa-mir-146a	1.13786	7.85191	7.50513	0.00615236	0.033072
hsa-mir-146b	1.40643	9.98323	23.4912	1.25484e-06	3.9688e-05
hsa-mir-148a	-2.41442	14.9674	99.1625	2.32605e-23	3.16343e-20
hsa-mir-149	1.90702	6.36476	9.60609	0.00193933	0.0135256
hsa-mir-153-1	-2.12158	0.736831	26.7409	2.32642e-07	1.37562e-05
hsa-mir-153-2	-1.99378	4.04769	28.6396	8.71798e-08	6.97439e-06
hsa-mir-1538	1.67573	-0.612485	6.68991	0.009696	0.0456282
hsa-mir-155	1.09428	8.80174	11.8656	0.000571806	0.00529018
hsa-mir-15a	1.01139	7.88518	24.7434	6.54933e-07	2.69912e-05
hsa-mir-15b	1.43256	8.40632	25.7443	3.89779e-07	1.97281e-05
hsa-mir-17	1.42417	10.398	27.0703	1.96189e-07	1.21281e-05
hsa-mir-181a-1	1.29704	9.6146	31.0252	2.54695e-08	3.14896e-06
hsa-mir-181a-2	1.16726	10.1531	28.233	1.07556e-07	7.84046e-06
hsa-mir-181b-1	1.56276	7.45988	26.1695	3.12716e-07	1.77206e-05
hsa-mir-181b-2	1.53769	7.44337	25.5508	4.30882e-07	2.02777e-05
hsa-mir-183	1.6484	12.928	13.9214	0.000190617	0.00229415
hsa-mir-188	1.18664	2.13232	11.3496	0.000754634	0.00645473
hsa-mir-18a	1.88326	5.4409	25.735	3.91661e-07	1.97281e-05
hsa-mir-1910	3.28456	0.0287876	11.2763	0.000785034	0.00663134
hsa-mir-1911	4.62837	2.11648	7.2238	0.00719434	0.0364017
hsa-mir-1914	1.93875	-0.842137	7.41445	0.0064702	0.0339748
hsa-mir-196a-1	1.98895	6.58773	11.546	0.000678949	0.00599592
hsa-mir-196a-2	2.05086	6.79702	12.0606	0.000514983	0.00503868
hsa-mir-196b	2.18178	8.52169	14.3189	0.000154311	0.00192534
hsa-mir-19a	1.24666	6.02868	15.2186	9.57568e-05	0.0012894
hsa-mir-202	-2.45153	-0.00158362	21.1744	4.19333e-06	0.00010561
hsa-mir-204	-3.48837	2.85921	55.1442	1.12002e-13	5.07741e-11
hsa-mir-205	3.56436	12.8727	11.3569	0.0007517	0.00645473
hsa-mir-20a	1.41366	9.47889	24.5039	7.41612e-07	2.91801e-05
hsa-mir-21	1.46441	18.3068	86.5587	1.35649e-20	9.22416e-18
hsa-mir-210	1.88147	9.32638	15.8565	6.83298e-05	0.000958027
hsa-mir-214	1.25596	4.60624	15.9369	6.54889e-05	0.000937525
hsa-mir-217	2.38837	7.25636	7.27082	0.00700838	0.0358323
hsa-mir-219a-1	1.05423	2.37865	12.7354	0.000358802	0.00393524
hsa-mir-219b	1.52114	0.133857	10.5205	0.00118061	0.00928106
hsa-mir-222	1.04161	6.83338	13.952	0.000187543	0.00229415
hsa-mir-223	1.43783	8.97811	12.2258	0.000471321	0.00474812
hsa-mir-224	3.81954	7.14637	28.1977	1.09536e-07	7.84046e-06
hsa-mir-2277	1.14889	0.670979	7.37937	0.00659763	0.0342472
hsa-mir-2355	1.19203	5.7875	9.08065	0.00258328	0.0168907
hsa-mir-24-2	1.03501	10.2199	22.7727	1.82333e-06	5.51052e-05
hsa-mir-25	1.16281	13.5151	17.1317	3.48755e-05	0.000558008
hsa-mir-27a	1.21956	10.9215	27.1669	1.86623e-07	1.2086e-05
hsa-mir-296	1.89223	2.16589	9.74452	0.00179859	0.012674
hsa-mir-29c	-1.44622	10.7994	34.9112	3.45098e-09	5.86667e-07
hsa-mir-301a	1.60599	3.94109	22.965	1.64976e-06	5.09925e-05
hsa-mir-301b	2.56589	1.33726	21.3892	3.74884e-06	9.88967e-05
hsa-mir-3074	1.27691	2.19011	10.1118	0.00147321	0.0109387
hsa-mir-30a	-1.27732	13.8849	24.4627	7.57628e-07	2.91801e-05
hsa-mir-3117	1.44417	0.227865	9.43598	0.00212769	0.0144254
hsa-mir-3127	1.09807	2.71914	8.99418	0.00270841	0.017223
hsa-mir-3129	1.68609	-0.16954	8.79638	0.0030183	0.0186586
hsa-mir-3143	2.42122	-0.733917	10.2347	0.00137824	0.0104716
hsa-mir-3150a	1.783	-0.872931	7.22893	0.0071738	0.0364017
hsa-mir-3150b	2.66781	1.26211	12.3808	0.000433781	0.00443565
hsa-mir-3176	2.16083	-0.310417	10.1034	0.00147994	0.0109387
hsa-mir-323b	1.55047	1.33134	8.52935	0.00349464	0.0207542
hsa-mir-324	1.13169	5.4402	19.205	1.17403e-05	0.000230287
hsa-mir-331	1.054	4.01688	17.806	2.44608e-05	0.000421098
hsa-mir-335	2.041	6.97417	23.9574	9.84898e-07	3.27063e-05
hsa-mir-33b	1.2517	1.34512	7.84632	0.00509242	0.0280392
hsa-mir-345	1.45963	3.66327	20.0229	7.65199e-06	0.000173445
hsa-mir-34b	1.91102	2.32683	6.6941	0.00967326	0.0456282
hsa-mir-34c	2.49694	4.76439	11.3754	0.000744238	0.00645473
hsa-mir-3613	1.19809	3.80579	15.7234	7.33118e-05	0.00100711
hsa-mir-3615	1.29452	2.82408	16.6694	4.44919e-05	0.000695506
hsa-mir-3618	2.62412	-0.690104	9.83739	0.00171	0.01224
hsa-mir-3651	1.95873	1.93247	10.3666	0.00128318	0.00997211
hsa-mir-3652	2.94849	0.72002	15.6505	7.61904e-05	0.00103619
hsa-mir-3654	3.21172	-0.495109	13.8141	0.000201819	0.00236615
hsa-mir-3662	3.8316	2.32083	17.2385	3.29692e-05	0.000533788
hsa-mir-3677	1.78327	2.35491	19.4427	1.03662e-05	0.000213606
hsa-mir-3680-2	1.99135	-0.670527	8.0155	0.00463786	0.0259568
hsa-mir-3682	1.65464	0.918026	14.5322	0.000137786	0.00177412
hsa-mir-3684	1.84324	-0.325881	10.0268	0.00154282	0.0113418
hsa-mir-3690-1	2.67767	0.246212	19.7991	8.60227e-06	0.0001857
hsa-mir-3691	2.07701	-0.0776451	11.7739	0.000600655	0.00546935
hsa-mir-372	12.5942	8.33041	11.7288	0.000615407	0.00554274
hsa-mir-375	-2.24158	14.1365	15.877	6.7596e-05	0.000957611
hsa-mir-378c	-1.23563	3.45671	24.9196	5.97702e-07	2.60486e-05
hsa-mir-378d-2	-1.51825	-0.141511	24.0654	9.31204e-07	3.24727e-05
hsa-mir-3913-2	1.0095	0.907128	7.41601	0.00646462	0.0339748
hsa-mir-3917	1.17376	0.744765	7.08105	0.00779035	0.0382486
hsa-mir-3922	1.2845	0.612548	8.1022	0.00442115	0.0250756
hsa-mir-3928	1.27635	0.535659	9.01488	0.0026779	0.017223
hsa-mir-3940	1.67731	0.467868	10.2416	0.00137312	0.0104716
hsa-mir-3941	1.96536	0.116264	14.5988	0.000132996	0.00175606
hsa-mir-421	1.89148	2.57759	29.4655	5.69201e-08	4.92529e-06
hsa-mir-4435-1	1.90968	-0.855355	6.77984	0.00921932	0.043994
hsa-mir-4442	2.37086	-0.747494	11.3052	0.000772918	0.00656981
hsa-mir-4449	3.85029	1.40685	11.766	0.000603237	0.00546935
hsa-mir-4461	1.67868	1.13216	6.62451	0.0100585	0.0465291
hsa-mir-4506	-1.16859	-1.05858	6.92748	0.00848814	0.0412281
hsa-mir-4510	-1.72537	-1.02783	12.0682	0.000512903	0.00503868
hsa-mir-4517	2.51199	-0.29694	10.6781	0.00108409	0.00867268
hsa-mir-452	2.73921	7.41401	21.8326	2.97509e-06	8.09226e-05
hsa-mir-455	1.65815	7.86991	18.8423	1.4198e-05	0.000264511
hsa-mir-4640	1.62483	-0.050397	10.331	0.00130811	0.0101081
hsa-mir-4645	1.98444	-0.532836	10.2951	0.00133388	0.010249
hsa-mir-4652	4.52801	2.10254	29.4557	5.72084e-08	4.92529e-06
hsa-mir-4657	2.29448	-0.761958	10.6868	0.00107901	0.00867268
hsa-mir-4658	2.25709	-0.43399	8.09274	0.0044443	0.0250799
hsa-mir-4660	1.90459	0.344448	12.6001	0.000385723	0.0040983
hsa-mir-4661	1.81788	2.80006	13.0172	0.000308643	0.00341264
hsa-mir-4664	4.26978	0.404457	30.0307	4.25261e-08	4.44888e-06
hsa-mir-4677	1.18324	3.02827	19.1868	1.1853e-05	0.000230287
hsa-mir-4687	2.54474	-0.310566	11.1732	0.000829853	0.00693361
hsa-mir-4745	2.92584	-0.331995	13.1181	0.000292462	0.00326023
hsa-mir-4746	2.4211	2.57884	34.2896	4.74904e-09	7.17633e-07
hsa-mir-4757	-1.32394	-0.945448	6.79568	0.00913787	0.0437588
hsa-mir-4758	1.93583	-0.456914	7.35758	0.00667807	0.034533
hsa-mir-4770	-1.39347	-0.890774	8.62163	0.00332194	0.019984
hsa-mir-4785	1.91878	-0.855991	8.13814	0.00433438	0.0248724
hsa-mir-4797	1.62496	0.0889272	7.09745	0.00771938	0.0380375
hsa-mir-483	5.08171	4.08966	18.4505	1.74375e-05	0.000307987
hsa-mir-490	-3.59637	1.76977	46.729	8.15142e-12	2.77148e-09
hsa-mir-493	1.2545	3.96653	12.496	0.000407819	0.00423384
hsa-mir-496	1.18705	1.52658	8.723	0.0031422	0.0192495
hsa-mir-5001	1.12726	0.379296	7.53154	0.00606282	0.0328503
hsa-mir-5003	2.03898	-0.245171	10.9006	0.000961352	0.00782897
hsa-mir-5008	2.24258	-0.579841	7.4305	0.00641276	0.0339352
hsa-mir-503	1.2313	3.39854	10.8794	0.000972384	0.00787168
hsa-mir-508	3.38172	5.03816	12.006	0.000530296	0.00507889
hsa-mir-509-2	3.31634	2.18285	6.83969	0.00891541	0.0428444
hsa-mir-509-3	3.10762	2.27173	7.20506	0.00726982	0.0364017
hsa-mir-5090	2.60075	-0.689538	12.6723	0.000371104	0.00400557
hsa-mir-5092	1.96244	-0.510093	7.45831	0.00631443	0.0335454
hsa-mir-512-1	6.82809	2.9116	7.52198	0.00609506	0.032894
hsa-mir-512-2	6.95272	2.90681	8.34254	0.00387275	0.0226049
hsa-mir-514a-1	3.3043	2.44105	6.6247	0.0100574	0.0465291
hsa-mir-514a-2	3.54334	2.43701	7.20247	0.00728034	0.0364017
hsa-mir-516a-1	5.59118	2.73581	7.0628	0.00787007	0.0385011
hsa-mir-516a-2	7.71062	2.63157	11.6861	0.000629686	0.00559721
hsa-mir-518c	6.42494	2.57622	7.48476	0.00622233	0.0333164
hsa-mir-519a-1	6.66406	2.65046	9.00296	0.00269543	0.017223
hsa-mir-520a	6.19451	3.64099	6.9143	0.00855091	0.0413852
hsa-mir-520d	5.66458	0.858015	6.70761	0.00960022	0.0454923
hsa-mir-520f	6.17913	1.9339	6.58579	0.0102796	0.0473907
hsa-mir-526b	6.26452	3.84321	8.92718	0.00280958	0.0176084
hsa-mir-545	1.35935	-0.143159	7.31345	0.00684406	0.0352573
hsa-mir-548d-1	3.12685	-0.519084	16.2571	5.5303e-05	0.000826506
hsa-mir-548d-2	2.61928	-0.447161	11.1228	0.000852737	0.00707148
hsa-mir-548e	1.2423	0.220156	8.10757	0.00440807	0.0250756
hsa-mir-548f-1	5.05519	1.40747	14.3353	0.000152969	0.00192534
hsa-mir-548k	2.17324	0.0852227	9.67687	0.00186602	0.0130814
hsa-mir-550a-1	1.84029	1.9146	16.548	4.74336e-05	0.000724299
hsa-mir-550a-2	1.61842	1.79929	12.5546	0.000395226	0.00413467
hsa-mir-550a-3	1.80574	0.854495	16.5282	4.79316e-05	0.000724299
hsa-mir-551a	2.0486	-0.364062	7.21065	0.00724722	0.0364017
hsa-mir-552	4.33498	5.13746	6.76226	0.00931059	0.0442741
hsa-mir-5589	3.45275	-0.438111	6.6752	0.00977633	0.0458476
hsa-mir-5680	-1.85029	-0.744953	22.3499	2.27227e-06	6.43809e-05
hsa-mir-5699	1.34028	0.352153	9.80352	0.00174178	0.0123376
hsa-mir-570	1.73066	0.645269	10.9646	0.000928706	0.00760868
hsa-mir-5703	2.97326	-0.584095	16.0577	6.14403e-05	0.000898482
hsa-mir-573	3.21215	0.0818229	13.9354	0.000189199	0.00229415
hsa-mir-579	1.40988	0.290238	9.02059	0.00266955	0.017223
hsa-mir-581	1.68236	-0.314202	8.61418	0.00333557	0.019984
hsa-mir-584	2.06144	7.1159	18.9108	1.36972e-05	0.000258725
hsa-mir-590	1.10373	4.4843	16.5675	4.69487e-05	0.000724299
hsa-mir-612	3.61808	-0.357513	12.1435	0.0004926	0.004926
hsa-mir-615	2.65279	1.92906	20.4453	6.13615e-06	0.000143882
hsa-mir-618	1.51339	0.296573	8.10058	0.00442511	0.0250756
hsa-mir-629	1.0432	6.83001	12.0216	0.000525864	0.00507889
hsa-mir-636	3.62535	-0.305787	24.8712	6.12909e-07	2.60486e-05
hsa-mir-639	1.52869	-0.283424	7.27824	0.00697948	0.0358192
hsa-mir-641	1.9712	-0.533354	8.98868	0.00271657	0.017223
hsa-mir-642a	-1.03575	1.45274	9.22879	0.0023824	0.0158826
hsa-mir-6507	-1.37667	-0.10547	6.62522	0.0100544	0.0465291
hsa-mir-6509	1.17819	0.758278	7.74431	0.0053882	0.0294295
hsa-mir-6514	1.34404	-0.273342	7.74586	0.0053836	0.0294295
hsa-mir-671	1.16056	3.23301	17.3297	3.14241e-05	0.000521181
hsa-mir-6715b	4.22519	-0.0566264	12.6765	0.000370272	0.00400557
hsa-mir-6728	3.21306	-0.490407	17.6057	2.7178e-05	0.000456321
hsa-mir-6731	2.08051	-0.643499	7.95981	0.00478275	0.026658
hsa-mir-6735	1.94762	-0.680231	8.66478	0.00324419	0.0196969
hsa-mir-675	3.77457	5.92034	16.1908	5.7271e-05	0.000846615
hsa-mir-6755	1.23042	0.3686	9.80756	0.00173796	0.0123376
hsa-mir-6763	1.90411	-0.855208	7.13856	0.00754436	0.0373103
hsa-mir-6777	2.31987	-0.405103	11.4517	0.000714295	0.00626737
hsa-mir-6781	2.32291	-0.569093	10.9686	0.000926672	0.00760868
hsa-mir-6783	1.7937	-0.128771	9.56619	0.00198194	0.0137522
hsa-mir-6788	-1.43497	-0.795677	8.98453	0.00272275	0.017223
hsa-mir-6803	2.14987	-0.464114	12.6493	0.000375715	0.00402341
hsa-mir-6821	2.18316	-0.7763	8.85995	0.00291495	0.018102
hsa-mir-6844	2.3773	-0.748595	10.4967	0.00119589	0.00934717
hsa-mir-6852	1.55989	-0.443992	7.85127	0.00507851	0.0280392
hsa-mir-6854	1.77177	1.23893	14.2472	0.000160299	0.00198188
hsa-mir-6891	3.81151	-0.2508	20.8203	5.04462e-06	0.000120363
hsa-mir-7-2	1.59874	2.43491	6.50621	0.0107498	0.0492249
hsa-mir-7-3	1.80385	2.41606	7.38341	0.00658284	0.0342472
hsa-mir-708	1.83096	7.5745	12.4426	0.000419647	0.00432363
hsa-mir-7112	1.84119	-0.591599	6.52393	0.0106433	0.0489015
hsa-mir-744	1.32908	4.91851	19.9014	8.15389e-06	0.000178859
hsa-mir-758	1.01342	3.91548	6.8784	0.00872436	0.0420749
hsa-mir-760	1.68058	0.496488	9.50024	0.00205445	0.0141114
hsa-mir-767	8.4331	6.20072	25.5441	4.32392e-07	2.02777e-05
hsa-mir-769	1.2057	4.56242	28.0974	1.15358e-07	7.84435e-06
hsa-mir-7705	1.35565	0.907263	9.52096	0.00203138	0.0140238
hsa-mir-7706	1.53942	1.68314	13.1346	0.000289896	0.00325834
hsa-mir-7846	2.17357	-0.803213	9.8558	0.00169298	0.01224
hsa-mir-7854	1.60727	-0.0677667	8.32595	0.00390826	0.0227147
hsa-mir-7974	1.8601	0.799344	8.45948	0.00363145	0.0213837
hsa-mir-877	2.28452	2.37538	25.9001	3.59545e-07	1.95592e-05
hsa-mir-92a-2	1.00206	12.823	14.6546	0.000129117	0.00172156
hsa-mir-92b	1.06887	6.74266	14.5584	0.000135885	0.00177412
hsa-mir-93	1.91381	13.3392	36.5797	1.46553e-09	3.32186e-07
hsa-mir-935	2.25973	1.84889	8.0508	0.00454836	0.025561
hsa-mir-937	2.83273	1.72215	24.4255	7.72415e-07	2.91801e-05
hsa-mir-940	1.99902	1.59557	18.5986	1.61339e-05	0.000292562
hsa-mir-942	1.49241	3.70787	20.057	7.51665e-06	0.000173265
hsa-mir-944	3.80827	7.19149	11.9467	0.000547448	0.00513468
hsa-mir-96	1.07903	4.87424	8.17522	0.00424665	0.0245598

## Sheet: HNSC
miRNA	logFC	logCPM	LR	PValue	FDR
hsa-let-7c	-1.59786	11.127	89.7831	2.65758e-21	6.93432e-20
hsa-mir-1-1	-3.17155	8.20072	96.3662	9.54829e-23	2.80282e-21
hsa-mir-1-2	-3.15731	8.29713	95.052	1.85451e-22	5.33266e-21
hsa-mir-100	-1.55955	11.5213	125.184	4.63986e-29	2.42132e-27
hsa-mir-101-1	-1.73674	12.1496	246.377	1.60054e-55	7.51719e-53
hsa-mir-101-2	-1.73988	12.1617	248.565	5.33782e-56	3.7605e-53
hsa-mir-105-1	5.89791	5.1273	51.9917	5.57368e-13	6.18371e-12
hsa-mir-105-2	5.84156	5.13006	49.7323	1.76222e-12	1.88104e-11
hsa-mir-106a	1.58349	4.37513	29.7643	4.87901e-08	3.04183e-07
hsa-mir-1180	1.02705	4.43995	28.7412	8.27262e-08	5.00263e-07
hsa-mir-1197	-1.18755	-0.64335	18.5661	1.64116e-05	6.47731e-05
hsa-mir-1226	1.14211	0.294281	28.5926	8.93209e-08	5.37834e-07
hsa-mir-1229	1.47007	-0.359006	25.1149	5.40138e-07	2.85039e-06
hsa-mir-1231	1.39785	-1.0625	14.2974	0.000156078	0.000515022
hsa-mir-1237	1.43274	-0.867006	17.6717	2.62508e-05	9.86331e-05
hsa-mir-1245a	1.27318	1.84417	33.6294	6.66787e-09	4.58294e-08
hsa-mir-1246	1.44137	-0.811191	7.27134	0.00700635	0.0156449
hsa-mir-1247	-1.22218	6.41294	27.0515	1.98107e-07	1.13932e-06
hsa-mir-1248	1.37239	2.00354	22.0674	2.63246e-06	1.17787e-05
hsa-mir-1251	-2.87766	-0.882545	34.3727	4.55062e-09	3.2383e-08
hsa-mir-1254-1	1.73882	-0.145678	38.2896	6.09854e-10	4.82744e-09
hsa-mir-1254-2	1.93575	-0.124501	47.5562	5.34495e-12	5.26646e-11
hsa-mir-1258	-2.22623	0.155606	102.026	5.48085e-24	1.75512e-22
hsa-mir-1265	-1.57581	-1.20245	47.2778	6.16073e-12	5.98653e-11
hsa-mir-1269a	4.5977	6.80228	45.4205	1.58964e-11	1.48332e-10
hsa-mir-1269b	5.93041	4.23636	23.5771	1.20007e-06	5.79076e-06
hsa-mir-127	-1.26737	9.77103	76.5751	2.11993e-18	4.26712e-17
hsa-mir-1276	1.08562	-0.479427	14.4526	0.000143734	0.00047991
hsa-mir-1277	1.54816	0.921269	37.3436	9.90453e-10	7.50295e-09
hsa-mir-1283-2	2.40827	-0.480858	7.00901	0.00811006	0.0175461
hsa-mir-1285-1	1.03814	-1.13184	12.2022	0.00047734	0.00140119
hsa-mir-129-1	1.14336	2.53639	8.82388	0.00297314	0.00721024
hsa-mir-1292	1.42696	0.127574	40.8189	1.67008e-10	1.41755e-09
hsa-mir-1293	2.9092	4.17834	72.2247	1.92037e-17	3.3405e-16
hsa-mir-1295b	1.59202	-0.250615	6.0291	0.0140719	0.0281238
hsa-mir-1298	-2.13967	-1.00482	26.89	2.15366e-07	1.21868e-06
hsa-mir-1301	1.94721	3.36038	152.702	4.44946e-35	4.17953e-33
hsa-mir-1304	1.97223	1.90146	27.6745	1.43541e-07	8.42704e-07
hsa-mir-1305	2.86495	0.46815	61.7293	3.94073e-15	5.5787e-14
hsa-mir-1306	1.2647	3.06651	69.3543	8.22736e-17	1.39667e-15
hsa-mir-1307	1.38443	10.8344	102.461	4.39905e-24	1.44146e-22
hsa-mir-130b	1.72644	5.32162	123.852	9.07677e-29	4.41006e-27
hsa-mir-1323	1.79868	0.0953153	5.31341	0.0211619	0.040239
hsa-mir-133a-1	-2.83126	8.06557	72.5943	1.59236e-17	2.84005e-16
hsa-mir-133a-2	-2.84328	7.88165	72.6481	1.54956e-17	2.79914e-16
hsa-mir-133b	-2.70203	6.67778	55.7622	8.17899e-14	9.84974e-13
hsa-mir-1343	1.267	0.0142509	26.652	2.43597e-07	1.37291e-06
hsa-mir-135a-1	-2.65037	-0.251581	43.6123	4.00322e-11	3.56996e-10
hsa-mir-135a-2	-3.47602	-0.174147	102.826	3.65973e-24	1.22775e-22
hsa-mir-135b	1.6595	5.77066	49.4766	2.00756e-12	2.1268e-11
hsa-mir-136	-1.35551	5.25619	80.6431	2.70396e-19	5.95294e-18
hsa-mir-137	2.0434	1.18918	17.7263	2.55069e-05	9.63518e-05
hsa-mir-138-1	1.01891	1.39827	13.3705	0.00025562	0.000795073
hsa-mir-139	-1.69143	6.0088	211.776	5.62923e-48	9.91449e-46
hsa-mir-140	-1.06365	9.97811	144.556	2.68539e-33	2.10206e-31
hsa-mir-142	1.26168	11.4019	34.612	4.02411e-09	2.92267e-08
hsa-mir-143	-1.20847	16.3261	57.7824	2.9278e-14	3.75025e-13
hsa-mir-147b	1.25585	0.639647	22.2816	2.35451e-06	1.0633e-05
hsa-mir-1537	1.30418	-0.44317	19.5686	9.7052e-06	3.96366e-05
hsa-mir-15b	1.00395	8.49171	56.9743	4.41535e-14	5.50551e-13
hsa-mir-181b-1	1.04632	7.45764	67.1893	2.46646e-16	3.94915e-15
hsa-mir-181b-2	1.06858	7.37334	62.478	2.69444e-15	3.99628e-14
hsa-mir-182	1.358	14.2239	50.1932	1.39332e-12	1.49862e-11
hsa-mir-183	1.72868	13.1397	76.6504	2.04067e-18	4.16711e-17
hsa-mir-184	1.89767	3.56344	13.812	0.000202042	0.000645527
hsa-mir-187	1.74389	5.56517	29.3217	6.13062e-08	3.75567e-07
hsa-mir-18a	1.7478	4.86129	80.1735	3.42944e-19	7.43396e-18
hsa-mir-190b	-1.02648	-0.057868	23.9746	9.76134e-07	4.86102e-06
hsa-mir-1910	3.60832	0.956812	112.966	2.19503e-26	8.83656e-25
hsa-mir-1911	2.56697	1.22944	9.54551	0.0020044	0.00505222
hsa-mir-1912	-1.72367	-1.15739	15.771	7.14887e-05	0.000253085
hsa-mir-1914	1.26318	-0.967883	12.2847	0.00045669	0.00134901
hsa-mir-1915	1.0701	-1.05416	7.31511	0.00683771	0.0153413
hsa-mir-193b	1.88058	7.56361	100.753	1.04203e-23	3.19178e-22
hsa-mir-195	-1.67921	4.88462	196.344	1.31141e-44	2.05309e-42
hsa-mir-196a-1	4.50973	5.33646	139.435	3.5383e-32	2.37403e-30
hsa-mir-196a-2	4.5105	5.47601	139.989	2.67666e-32	1.88571e-30
hsa-mir-196b	4.12752	7.68303	162.519	3.1859e-37	3.20638e-35
hsa-mir-19a	1.33706	5.29544	45.1079	1.86475e-11	1.71728e-10
hsa-mir-202	-1.99231	-0.357101	61.72	3.95933e-15	5.5787e-14
hsa-mir-203b	1.2814	7.24372	30.0995	4.10444e-08	2.60502e-07
hsa-mir-205	1.2757	13.9442	54.9221	1.25405e-13	1.48484e-12
hsa-mir-206	-1.95491	11.1597	26.5549	2.56149e-07	1.4379e-06
hsa-mir-208a	-2.50415	-0.819959	37.5308	8.99801e-10	6.92797e-09
hsa-mir-208b	-3.13062	1.10127	53.4652	2.63215e-13	2.99089e-12
hsa-mir-20b	1.59823	5.02502	19.9484	7.95608e-06	3.32644e-05
hsa-mir-21	1.39179	18.2252	228.757	1.11292e-51	3.13621e-49
hsa-mir-210	2.61909	10.334	97.5327	5.29732e-23	1.58807e-21
hsa-mir-211	-3.4524	-0.0551683	41.7408	1.04213e-10	8.95342e-10
hsa-mir-2117	1.31455	-1.0669	13.44	0.000246321	0.000769549
hsa-mir-216a	-1.51753	-0.223791	38.6183	5.15324e-10	4.14608e-09
hsa-mir-217	-1.09564	3.99712	34.0795	5.29063e-09	3.7087e-08
hsa-mir-224	1.80002	7.35652	75.7711	3.18527e-18	6.3212e-17
hsa-mir-2277	1.54138	0.631879	42.0717	8.79854e-11	7.65256e-10
hsa-mir-2355	1.66566	6.70187	86.7864	1.20899e-20	3.09722e-19
hsa-mir-2681	-1.63675	-1.09184	9.07607	0.00258976	0.00635709
hsa-mir-2682	1.84927	-0.976587	11.4024	0.000733474	0.00205869
hsa-mir-26a-1	-1.05481	10.0737	122.621	1.68759e-28	7.92605e-27
hsa-mir-26a-2	-1.05045	10.0821	121.899	2.42892e-28	1.10398e-26
hsa-mir-299	-2.30018	3.26227	219.623	1.09324e-49	2.5673e-47
hsa-mir-29a	-1.18196	12.8885	121.015	3.79208e-28	1.6697e-26
hsa-mir-29c	-1.78793	11.1553	129.926	4.25379e-30	2.49733e-28
hsa-mir-301a	2.37628	3.96522	107.467	3.51742e-25	1.33947e-23
hsa-mir-301b	2.78732	1.1761	83.702	5.75274e-20	1.36894e-18
hsa-mir-302a	-1.09111	-1.16429	12.7597	0.000354163	0.00107546
hsa-mir-3074	1.40587	2.38237	50.6053	1.12941e-12	1.2241e-11
hsa-mir-30a	-1.71252	13.4709	139.123	4.1405e-32	2.6518e-30
hsa-mir-31	2.73142	7.51121	63.3534	1.72753e-15	2.58945e-14
hsa-mir-3129	1.39575	0.092714	30.735	2.95789e-08	1.91177e-07
hsa-mir-3136	1.18726	-0.0936851	24.2552	8.43782e-07	4.29202e-06
hsa-mir-3137	1.49959	-0.880145	17.5849	2.74763e-05	0.000102418
hsa-mir-3144	2.19706	-0.471528	23.1559	1.49383e-06	7.11083e-06
hsa-mir-3145	1.46806	-0.956667	14.7632	0.000121894	0.000411866
hsa-mir-3150a	1.27171	-0.939707	11.9124	0.000557615	0.00161
hsa-mir-3150b	1.00594	1.65415	14.6799	0.0001274	0.000428415
hsa-mir-3161	1.93641	-0.574409	12.5881	0.000388205	0.00116627
hsa-mir-3164	1.59284	-0.983211	10.2317	0.00138048	0.00361035
hsa-mir-3170	1.96167	0.242122	49.1018	2.43011e-12	2.51767e-11
hsa-mir-3171	1.9591	-0.958429	17.3924	3.04037e-05	0.000112734
hsa-mir-3174	1.18423	-0.613219	19.1363	1.2171e-05	4.8997e-05
hsa-mir-3176	1.70589	-0.430323	28.1626	1.11539e-07	6.63114e-07
hsa-mir-3177	1.14106	-0.810639	10.92	0.000951326	0.00257773
hsa-mir-3181	1.08213	-1.08085	9.49435	0.00206106	0.00517652
hsa-mir-3186	1.1083	-1.13206	6.34252	0.0117878	0.0240361
hsa-mir-3187	1.2973	-0.162651	19.5817	9.63877e-06	3.94797e-05
hsa-mir-3188	1.3951	-0.774907	17.8152	2.4343e-05	9.2946e-05
hsa-mir-3196	1.12914	-1.12457	10.5547	0.00115892	0.00309264
hsa-mir-3200	1.03477	1.51566	15.3437	8.9621e-05	0.000312564
hsa-mir-320b-1	1.47433	1.54325	48.9468	2.63005e-12	2.70491e-11
hsa-mir-320b-2	1.5054	2.20093	53.09	3.18617e-13	3.59145e-12
hsa-mir-320c-2	1.21573	-0.421555	17.9323	2.28901e-05	8.78806e-05
hsa-mir-323b	1.58642	1.92815	36.0121	1.96093e-09	1.45418e-08
hsa-mir-324	1.29639	5.66023	84.8112	3.28266e-20	8.2594e-19
hsa-mir-331	1.01509	4.76483	56.8917	4.60487e-14	5.69146e-13
hsa-mir-337	-1.49238	4.80103	77.5428	1.29878e-18	2.73131e-17
hsa-mir-33a	1.07799	5.49269	23.7225	1.11276e-06	5.46301e-06
hsa-mir-345	1.01722	3.86654	27.3506	1.69712e-07	9.80015e-07
hsa-mir-34b	-1.58469	3.16042	52.6646	3.95665e-13	4.42454e-12
hsa-mir-34c	-1.45313	5.62939	49.3409	2.15135e-12	2.26213e-11
hsa-mir-3591	-1.73655	-1.05879	24.1903	8.72726e-07	4.40742e-06
hsa-mir-3607	1.27876	4.97487	19.2898	1.12302e-05	4.54694e-05
hsa-mir-3609	1.31817	-0.598252	15.4087	8.65877e-05	0.000303488
hsa-mir-3610	1.0654	0.571888	23.9157	1.00649e-06	4.97595e-06
hsa-mir-3614	1.10539	3.11386	27.4396	1.6208e-07	9.4193e-07
hsa-mir-3618	1.15377	-0.692542	10.2273	0.00138377	0.00361062
hsa-mir-3619	2.03924	-0.352383	39.6326	3.06531e-10	2.52575e-09
hsa-mir-3620	1.01757	-0.736206	12.3952	0.000430429	0.00127411
hsa-mir-3622a	-1.23688	-0.833155	16.5941	4.62955e-05	0.000168554
hsa-mir-3646	1.37385	-1.06203	14.4465	0.000144197	0.000480317
hsa-mir-3651	1.8981	1.29978	38.1894	6.41987e-10	5.05341e-09
hsa-mir-3652	1.53987	0.827214	38.9783	4.28535e-10	3.47015e-09
hsa-mir-3660	1.88442	-0.936984	10.4239	0.00124397	0.00328846
hsa-mir-3662	2.18464	1.09452	47.1719	6.50267e-12	6.27552e-11
hsa-mir-3664	1.52132	-0.490539	11.2171	0.000810489	0.00224357
hsa-mir-3667	1.49266	-0.703601	14.1089	0.000172525	0.000564007
hsa-mir-3677	1.25359	2.91969	42.2014	8.23404e-11	7.20607e-10
hsa-mir-3679	1.29055	-0.916844	15.8252	6.94721e-05	0.000247187
hsa-mir-3689f	1.93323	-0.996607	5.37505	0.0204267	0.038999
hsa-mir-369	-1.24943	3.76385	74.8075	5.18919e-18	9.8805e-17
hsa-mir-3690-1	1.21237	0.537907	19.6579	9.26206e-06	3.80473e-05
hsa-mir-3691	1.4865	0.0241129	41.7786	1.02216e-10	8.8357e-10
hsa-mir-374c	3.90008	-0.352433	12.1025	0.000503547	0.00146288
hsa-mir-375	-3.268	11.1647	168.92	1.27351e-38	1.49531e-36
hsa-mir-376a-1	-1.16284	1.08052	34.4382	4.40002e-09	3.16308e-08
hsa-mir-376a-2	-1.05575	0.562885	22.4994	2.1021e-06	9.57359e-06
hsa-mir-376c	-1.7226	3.13667	117.464	2.27232e-27	9.41676e-26
hsa-mir-377	-1.399	2.49283	75.2957	4.05248e-18	7.82184e-17
hsa-mir-378a	-1.89805	10.6419	188.392	7.13483e-43	1.0053e-40
hsa-mir-378b	-1.36781	-1.10554	25.4166	4.61938e-07	2.50589e-06
hsa-mir-378c	-2.23275	3.70764	240.56	2.96841e-54	1.04562e-51
hsa-mir-378d-1	-2.50979	-0.121344	148.551	3.59467e-34	3.16556e-32
hsa-mir-378d-2	-2.38866	0.0746401	146.821	8.58938e-34	7.11908e-32
hsa-mir-378f	-2.18829	-0.987086	60.3473	7.95153e-15	1.07728e-13
hsa-mir-378i	-3.41792	-0.796884	140.1	2.53131e-32	1.87717e-30
hsa-mir-379	-1.65241	10.2503	127.232	1.65262e-29	9.31415e-28
hsa-mir-381	-3.10902	6.89467	400.746	3.78864e-89	5.33819e-86
hsa-mir-3911	1.73429	-0.610498	24.1706	8.81668e-07	4.43668e-06
hsa-mir-3922	1.65663	0.779028	71.7791	2.40694e-17	4.13583e-16
hsa-mir-3926-1	-1.02569	-0.355313	27.4352	1.62448e-07	9.4193e-07
hsa-mir-3927	1.55679	-0.84565	12.1215	0.000498445	0.00145367
hsa-mir-3928	1.52724	0.784365	62.0882	3.28416e-15	4.72182e-14
hsa-mir-3934	1.36173	2.36818	75.6405	3.40313e-18	6.65973e-17
hsa-mir-3935	1.67665	-1.05017	15.854	6.84219e-05	0.000244687
hsa-mir-3940	1.30553	1.03204	33.1481	8.53986e-09	5.8411e-08
hsa-mir-410	-1.82709	4.09827	117.618	2.10218e-27	8.97568e-26
hsa-mir-411	-2.24784	3.83661	213.697	2.14446e-48	4.3165e-46
hsa-mir-421	1.07598	2.27242	45.9426	1.2177e-11	1.15929e-10
hsa-mir-424	1.76456	6.8551	84.006	4.93264e-20	1.19829e-18
hsa-mir-425	1.00921	8.16957	30.6249	3.13051e-08	1.99588e-07
hsa-mir-4326	2.16799	2.74759	44.7117	2.28293e-11	2.07526e-10
hsa-mir-433	-1.16892	0.467341	32.7294	1.05922e-08	7.20983e-08
hsa-mir-4423	-1.47869	-0.633381	24.6602	6.83822e-07	3.56854e-06
hsa-mir-4424	-1.15084	-0.910585	20.0047	7.72528e-06	3.23956e-05
hsa-mir-4433b	1.08968	-0.656172	6.89134	0.00866142	0.0186036
hsa-mir-4435-1	1.48039	-0.979869	13.5029	0.000238192	0.000747465
hsa-mir-4435-2	1.26465	-0.966585	9.80936	0.00173626	0.00443187
hsa-mir-4449	1.95041	0.66778	26.2954	2.92986e-07	1.62526e-06
hsa-mir-4458	-1.84814	-1.11885	23.226	1.44035e-06	6.9029e-06
hsa-mir-4466	1.01022	-1.11468	8.55881	0.00343855	0.00822566
hsa-mir-4479	1.1275	-0.875966	11.2822	0.000782541	0.00217905
hsa-mir-448	1.49658	-1.03412	5.82555	0.0157951	0.0312135
hsa-mir-4482	1.10071	-0.988865	4.96226	0.0259063	0.0483053
hsa-mir-4484	-1.12127	-0.455886	20.8643	4.93e-06	2.11779e-05
hsa-mir-4488	1.83738	-1.02403	11.6943	0.000626912	0.00179172
hsa-mir-4492	1.11741	-0.828234	10.5113	0.00118647	0.00315421
hsa-mir-449a	-3.10281	0.983336	60.9931	5.72757e-15	7.9119e-14
hsa-mir-449b	-2.90249	-0.497512	27.0365	1.99649e-07	1.14352e-06
hsa-mir-449c	-2.70582	-0.870607	23.6952	1.12866e-06	5.52183e-06
hsa-mir-450a-1	1.9138	2.37944	83.6758	5.82943e-20	1.36894e-18
hsa-mir-450a-2	1.95986	2.37051	90.2438	2.10551e-21	5.59749e-20
hsa-mir-450b	1.38697	3.88875	68.2421	1.44607e-16	2.36919e-15
hsa-mir-4510	-1.88053	-1.17271	33.6918	6.45709e-09	4.45982e-08
hsa-mir-4517	1.9502	-0.719685	24.5909	7.08857e-07	3.67198e-06
hsa-mir-4519	1.10768	-0.984333	9.94711	0.00161102	0.0041422
hsa-mir-451a	-1.0354	9.94989	22.33	2.29596e-06	1.0402e-05
hsa-mir-4522	1.30469	-0.789071	13.0198	0.000308223	0.000942051
hsa-mir-4523	1.85685	-0.863691	25.2739	4.97402e-07	2.65469e-06
hsa-mir-4524a	-1.45762	-0.982327	35.5841	2.44276e-09	1.79263e-08
hsa-mir-4529	-1.03296	-0.577309	17.9808	2.23143e-05	8.59039e-05
hsa-mir-4536-1	-1.07028	-0.869562	22.0668	2.63327e-06	1.17787e-05
hsa-mir-4536-2	-1.09455	-0.867193	25.0301	5.64437e-07	2.9675e-06
hsa-mir-454	1.58692	3.58852	94.8625	2.04082e-22	5.75103e-21
hsa-mir-455	2.60463	8.93561	165.158	8.44993e-38	9.15842e-36
hsa-mir-4633	-1.10891	-1.19467	14.5863	0.000133888	0.000448094
hsa-mir-4634	-1.12114	-1.20081	20.6629	5.47661e-06	2.33835e-05
hsa-mir-4638	1.72646	0.229982	45.391	1.61377e-11	1.49592e-10
hsa-mir-4640	1.66819	-0.136377	41.0174	1.50879e-10	1.28841e-09
hsa-mir-4645	1.35311	-0.407744	25.4071	4.64203e-07	2.50598e-06
hsa-mir-4646	1.05355	-1.05818	9.29704	0.00229525	0.00568367
hsa-mir-4648	1.2459	-1.05227	9.48398	0.00207274	0.0051966
hsa-mir-4652	3.79877	2.13742	100.926	9.54624e-24	2.98903e-22
hsa-mir-4653	1.11715	-1.12544	12.1191	0.000499079	0.00145367
hsa-mir-4658	2.76329	-0.398471	48.5464	3.2256e-12	3.24633e-11
hsa-mir-4660	1.12444	-0.0552832	26.3509	2.84683e-07	1.58545e-06
hsa-mir-4664	2.06388	0.686523	67.817	1.79397e-16	2.90541e-15
hsa-mir-4665	1.7763	-0.584703	23.1448	1.50252e-06	7.12812e-06
hsa-mir-4668	1.40114	1.25219	37.7147	8.18854e-10	6.33937e-09
hsa-mir-4674	1.72959	-0.66764	18.7659	1.47789e-05	5.88235e-05
hsa-mir-4684	1.1642	-1.04035	9.85801	0.00169094	0.00433034
hsa-mir-4687	1.02078	-0.32364	11.6666	0.000636309	0.00180758
hsa-mir-4691	1.17603	-0.810525	11.1474	0.00084148	0.00232479
hsa-mir-4699	-1.56983	-1.12408	25.6528	4.08697e-07	2.23199e-06
hsa-mir-4705	-1.4348	-1.01245	7.3826	0.00658578	0.0148233
hsa-mir-4707	1.35359	-0.323628	17.9897	2.22098e-05	8.57359e-05
hsa-mir-4708	-1.00575	-1.18194	13.7283	0.000211251	0.000673423
hsa-mir-4713	2.05599	-0.193877	48.4004	3.47503e-12	3.47257e-11
hsa-mir-4714	1.44229	-0.517486	22.9646	1.65014e-06	7.7761e-06
hsa-mir-4724	2.43998	-0.399279	48.7985	2.83653e-12	2.89614e-11
hsa-mir-4725	1.48908	-0.811764	17.0017	3.73464e-05	0.000137034
hsa-mir-4726	1.36542	-0.792973	18.1583	2.03283e-05	7.8905e-05
hsa-mir-4739	1.5636	-1.03343	13.9333	0.000189408	0.000608801
hsa-mir-4740	-1.76141	-0.969528	60.8511	6.15601e-15	8.42118e-14
hsa-mir-4745	3.1746	-0.520064	60.9961	5.71875e-15	7.9119e-14
hsa-mir-4746	2.00046	2.63764	94.1825	2.87737e-22	7.94944e-21
hsa-mir-4749	1.44511	-1.01666	15.3126	9.11061e-05	0.000316959
hsa-mir-4752	1.08444	-1.04593	6.47466	0.0109423	0.0227736
hsa-mir-4758	1.95756	-0.490527	33.7646	6.21994e-09	4.31719e-08
hsa-mir-4760	1.27568	-1.07138	8.52532	0.00350239	0.00833593
hsa-mir-4763	1.48225	-0.808572	20.5069	5.94176e-06	2.5141e-05
hsa-mir-4766	2.04213	-0.0945816	44.4108	2.66208e-11	2.40441e-10
hsa-mir-4776-1	-1.93499	-0.977378	39.2327	3.76178e-10	3.0816e-09
hsa-mir-4776-2	-1.66029	-0.960285	24.3635	7.97669e-07	4.07216e-06
hsa-mir-4784	1.67223	-0.100797	17.4623	2.9306e-05	0.00010895
hsa-mir-4788	1.66677	0.317989	21.8759	2.90861e-06	1.28875e-05
hsa-mir-483	1.07485	2.36711	20.6822	5.42184e-06	2.322e-05
hsa-mir-486-1	-1.96729	7.00634	125.567	3.82527e-29	2.073e-27
hsa-mir-486-2	-1.95625	6.99148	125.079	4.88977e-29	2.4606e-27
hsa-mir-487b	-1.21706	2.5846	64.6653	8.87663e-16	1.37441e-14
hsa-mir-488	-2.17624	-0.71648	24.4764	7.52251e-07	3.86833e-06
hsa-mir-492	1.00388	-1.09004	5.63673	0.017588	0.0341988
hsa-mir-495	-1.50025	3.10573	83.077	7.8917e-20	1.82285e-18
hsa-mir-498	1.97045	-0.607041	7.27422	0.00699512	0.0156446
hsa-mir-499a	-3.15013	1.39774	104.337	1.7065e-24	6.01113e-23
hsa-mir-5001	1.38404	0.52063	56.4126	5.87514e-14	7.13627e-13
hsa-mir-5008	2.18091	-0.272851	38.1657	6.49852e-10	5.08689e-09
hsa-mir-5009	1.06629	-1.05483	9.92601	0.00162959	0.00418233
hsa-mir-503	3.03617	3.5163	130.271	3.57537e-30	2.1903e-28
hsa-mir-505	1.06528	5.4386	54.5491	1.51611e-13	1.78016e-12
hsa-mir-508	1.57715	6.15021	9.25576	0.00234756	0.00578271
hsa-mir-5089	-3.18986	-0.937696	109.277	1.41094e-25	5.52228e-24
hsa-mir-509-1	2.01497	3.21768	10.4534	0.00122426	0.00324854
hsa-mir-509-2	2.07015	3.24169	11.5568	0.000675013	0.00190982
hsa-mir-509-3	1.8129	3.35751	9.33937	0.00224283	0.00556364
hsa-mir-5092	1.62964	-0.540214	24.4019	7.81915e-07	4.00625e-06
hsa-mir-5094	1.98539	-0.941625	23.0519	1.57689e-06	7.45585e-06
hsa-mir-512-1	2.78161	0.872164	23.9742	9.76345e-07	4.86102e-06
hsa-mir-512-2	2.6721	0.861918	22.0488	2.65808e-06	1.1852e-05
hsa-mir-513c	1.98412	-0.377765	7.20136	0.00728482	0.0161898
hsa-mir-514a-1	1.28976	3.62434	5.0985	0.0239466	0.0449876
hsa-mir-514a-2	1.32349	3.65069	5.20388	0.0225365	0.0425086
hsa-mir-514a-3	1.30317	3.62601	5.28656	0.0214907	0.0406448
hsa-mir-514b	2.63372	-0.332801	7.37771	0.0066037	0.0148399
hsa-mir-516a-1	2.52767	1.53663	16.0554	6.15174e-05	0.000221117
hsa-mir-516a-2	2.90318	1.46358	20.2206	6.90044e-06	2.911e-05
hsa-mir-516b-1	1.24758	-0.294571	6.08963	0.0135977	0.0273312
hsa-mir-516b-2	1.28979	-0.603492	7.21164	0.00724324	0.0161228
hsa-mir-517c	1.40854	-0.150863	5.73732	0.0166082	0.0325918
hsa-mir-518a-1	2.31943	0.430437	10.7558	0.00103955	0.00279528
hsa-mir-518a-2	2.81539	0.463654	14.1312	0.000170492	0.000558659
hsa-mir-518b	1.72397	1.02701	14.1627	0.000167663	0.000550668
hsa-mir-518c	1.41611	0.676457	8.65463	0.00326231	0.00783065
hsa-mir-518e	2.11318	0.862391	11.0284	0.000897289	0.00246448
hsa-mir-518f	2.15542	0.258841	12.1181	0.000499345	0.00145367
hsa-mir-519a-1	3.11991	1.68892	26.41	2.76113e-07	1.54382e-06
hsa-mir-519a-2	2.57672	1.79532	17.6116	2.70935e-05	0.000101259
hsa-mir-519c	2.64848	0.0990238	12.6268	0.000380266	0.00114486
hsa-mir-519d	1.10253	-0.34216	5.31074	0.0211944	0.0402465
hsa-mir-520a	1.96007	1.72298	11.1342	0.000847511	0.00233432
hsa-mir-520b	2.27467	0.842115	17.0186	3.70152e-05	0.00013653
hsa-mir-520c	2.69529	-0.0164251	15.6232	7.72998e-05	0.000272289
hsa-mir-520d	1.62315	-0.0706013	6.50868	0.0107349	0.0224748
hsa-mir-520e	2.70046	-0.531806	11.8143	0.000587763	0.001687
hsa-mir-520f	2.64056	0.791321	18.2176	1.97046e-05	7.69078e-05
hsa-mir-520g	1.40105	-0.193556	8.54469	0.00346531	0.00827563
hsa-mir-521-1	3.33694	0.254467	9.79761	0.00174739	0.00445221
hsa-mir-522	2.82354	1.4191	14.3281	0.000153558	0.000509089
hsa-mir-525	2.08604	0.968736	11.1326	0.000848241	0.00233432
hsa-mir-526b	1.72327	1.78769	12.5021	0.000406486	0.00121601
hsa-mir-527	2.45404	0.488122	10.1509	0.00144232	0.0037426
hsa-mir-545	1.26089	-0.07992	31.7879	1.71963e-08	1.13754e-07
hsa-mir-548aq	1.39816	-1.06282	15.2073	9.63293e-05	0.000333484
hsa-mir-548au	1.05179	-0.394806	16.2191	5.64216e-05	0.000204365
hsa-mir-548d-1	1.01416	-0.76837	9.59158	0.00195472	0.00495359
hsa-mir-548f-1	4.76902	0.523195	58.4352	2.10096e-14	2.79269e-13
hsa-mir-548k	1.92258	-0.108507	29.9506	4.43196e-08	2.78778e-07
hsa-mir-548x	1.47352	-1.07882	8.78427	0.00303839	0.00733062
hsa-mir-548y	1.70398	-0.964017	6.13041	0.0132876	0.0267844
hsa-mir-550a-1	1.56852	1.59398	80.827	2.46369e-19	5.51007e-18
hsa-mir-550a-2	1.5679	1.6084	76.6716	2.01887e-18	4.16711e-17
hsa-mir-550a-3	1.52398	0.733777	62.3642	2.85473e-15	4.18991e-14
hsa-mir-551a	1.16494	-0.00801151	10.8067	0.00101133	0.00272983
hsa-mir-5579	1.04225	0.673531	17.9165	2.30814e-05	8.83741e-05
hsa-mir-559	1.16919	-1.04397	7.81628	0.00517776	0.0119402
hsa-mir-561	-1.17491	-0.312268	18.8942	1.38172e-05	5.51516e-05
hsa-mir-5702	1.10166	-1.08166	9.35034	0.00222944	0.00554019
hsa-mir-572	1.08112	-1.10138	10.424	0.00124388	0.00328846
hsa-mir-573	2.18133	0.0599511	29.2356	6.40908e-08	3.90926e-07
hsa-mir-576	1.01161	3.74332	53.6306	2.41963e-13	2.81756e-12
hsa-mir-577	1.70351	2.37628	13.2964	0.000265911	0.000823447
hsa-mir-584	1.02842	7.51878	21.6025	3.35408e-06	1.47224e-05
hsa-mir-585	-1.00003	0.0192953	18.7087	1.52286e-05	6.04425e-05
hsa-mir-588	1.06378	-0.928967	6.23827	0.0125018	0.0254186
hsa-mir-592	2.37851	1.86004	49.1162	2.41237e-12	2.51767e-11
hsa-mir-597	1.02223	-0.947956	8.90224	0.0028482	0.00694312
hsa-mir-615	4.5964	1.64466	171.335	3.77996e-39	4.84179e-37
hsa-mir-616	1.26093	1.60305	38.474	5.54879e-10	4.41709e-09
hsa-mir-632	1.08243	-0.388487	16.6111	4.58806e-05	0.000167476
hsa-mir-636	1.68239	-0.410775	35.8789	2.09971e-09	1.54895e-08
hsa-mir-639	1.23473	-0.0337525	20.5464	5.82032e-06	2.47013e-05
hsa-mir-6499	1.15934	3.14265	33.9062	5.78342e-09	4.03408e-08
hsa-mir-6501	1.0635	-0.315407	15.812	6.99556e-05	0.000248281
hsa-mir-6505	-1.05604	-1.03267	10.3211	0.00131521	0.0034638
hsa-mir-6507	-1.65341	-1.02325	27.9456	1.24772e-07	7.38669e-07
hsa-mir-6510	-1.36268	4.35806	24.5092	7.39576e-07	3.81708e-06
hsa-mir-654	-1.41526	5.02008	69.1518	9.11702e-17	1.52927e-15
hsa-mir-655	-1.21063	1.90526	47.2939	6.11023e-12	5.97869e-11
hsa-mir-656	-1.02136	0.424423	29.7398	4.94087e-08	3.06682e-07
hsa-mir-658	1.26607	-0.418021	19.6814	9.14881e-06	3.7692e-05
hsa-mir-662	1.01808	-1.13969	7.65477	0.00566225	0.0128887
hsa-mir-665	-1.07463	-0.345152	27.6024	1.48991e-07	8.71071e-07
hsa-mir-671	1.21379	3.45314	104.662	1.44864e-24	5.23367e-23
hsa-mir-6717	-1.99328	-1.02046	53.5344	2.54102e-13	2.93467e-12
hsa-mir-6721	1.29575	-1.07633	14.6117	0.000132092	0.000443137
hsa-mir-6727	1.16232	-1.01408	11.3029	0.000773852	0.00215912
hsa-mir-6728	2.41255	-0.307289	48.6815	3.01088e-12	3.05204e-11
hsa-mir-6731	1.12752	-0.485405	17.2032	3.35862e-05	0.000124207
hsa-mir-6732	1.28636	-1.05085	13.1228	0.000291726	0.000897471
hsa-mir-6735	1.0889	-0.806171	11.423	0.000725414	0.00204422
hsa-mir-6737	1.11505	-0.78922	12.4828	0.00041071	0.00122604
hsa-mir-6744	-2.06004	-1.00539	11.3528	0.000753339	0.00211025
hsa-mir-6746	1.15727	-1.07519	10.5249	0.00117776	0.00313697
hsa-mir-6747	1.26424	-0.780643	18.0888	2.10833e-05	8.1611e-05
hsa-mir-6751	1.07495	-1.00693	10.3363	0.00130439	0.00344174
hsa-mir-6754	1.53994	-0.948317	15.8297	6.93047e-05	0.000247187
hsa-mir-6764	1.2997	-0.739998	20.5861	5.70077e-06	2.4267e-05
hsa-mir-6769a	1.10481	-1.04878	10.0206	0.00154797	0.00399467
hsa-mir-6772	1.21947	-0.907805	13.5467	0.000232702	0.000731868
hsa-mir-6773	1.09688	-1.02575	8.8274	0.00296741	0.00720876
hsa-mir-6777	1.44876	-0.366733	23.5029	1.24725e-06	5.99788e-06
hsa-mir-6781	1.65887	-0.733029	25.4146	4.62406e-07	2.50589e-06
hsa-mir-6783	1.37023	-0.248686	32.7039	1.07323e-08	7.27012e-08
hsa-mir-6789	1.00214	-1.13181	11.8399	0.000579757	0.00167051
hsa-mir-6793	1.47021	-0.517511	28.3613	1.00658e-07	6.00965e-07
hsa-mir-6795	1.05457	-1.08561	10.2819	0.00134338	0.00352482
hsa-mir-6796	1.23797	-1.08712	12.8839	0.000331424	0.00101077
hsa-mir-6797	1.47061	-0.644509	22.6204	1.97374e-06	9.148e-06
hsa-mir-6803	1.2962	-0.621592	22.6927	1.90089e-06	8.83945e-06
hsa-mir-6813	1.28256	-0.959751	13.4466	0.000245445	0.000768516
hsa-mir-6814	1.73746	-0.819972	22.566	2.0305e-06	9.31915e-06
hsa-mir-6819	1.22915	-1.11348	14.0675	0.000176366	0.000572581
hsa-mir-6820	1.04875	-0.187281	21.5285	3.48603e-06	1.52541e-05
hsa-mir-6824	1.22741	-1.02904	11.5386	0.000681642	0.00192472
hsa-mir-6832	1.36914	-1.05711	11.7145	0.000620165	0.00177604
hsa-mir-6834	1.15612	-0.921851	10.9422	0.000939986	0.00255683
hsa-mir-6840	1.03683	-1.04997	8.06181	0.00452079	0.010634
hsa-mir-6843	-1.49756	-1.01252	21.2643	4.00105e-06	1.73996e-05
hsa-mir-6844	1.6767	-0.806525	17.7999	2.45393e-05	9.2946e-05
hsa-mir-6847	1.10801	-1.10058	11.0002	0.000911029	0.00248292
hsa-mir-6850	2.50642	-0.826024	29.9031	4.54183e-08	2.84419e-07
hsa-mir-6852	1.20428	-0.145479	26.0565	3.31564e-07	1.8249e-06
hsa-mir-6856	1.25656	-1.00932	9.47489	0.00208303	0.00521314
hsa-mir-6860	1.13776	-0.949935	7.007	0.00811916	0.0175461
hsa-mir-6870	1.57231	-0.774497	21.1611	4.22245e-06	1.83059e-05
hsa-mir-6885	1.24803	-0.950475	13.2385	0.000274263	0.000845593
hsa-mir-6886	1.27943	-1.01391	12.2506	0.000465112	0.00137101
hsa-mir-6887	1.21681	-0.857759	11.0061	0.00090811	0.00248292
hsa-mir-6891	2.64901	-0.0719532	50.9209	9.61655e-13	1.05857e-11
hsa-mir-6895	1.02172	-1.02541	7.08254	0.00778387	0.0171295
hsa-mir-7-2	1.81934	0.938093	45.6089	1.44384e-11	1.36535e-10
hsa-mir-7-3	1.83214	0.884215	43.713	3.80233e-11	3.41241e-10
hsa-mir-708	1.34403	8.39091	66.793	3.01575e-16	4.77437e-15
hsa-mir-7110	1.55519	-0.87088	19.8599	8.33303e-06	3.46349e-05
hsa-mir-7112	2.17711	-0.568642	34.3301	4.65126e-09	3.27682e-08
hsa-mir-7151	-1.27971	-1.06081	15.2977	9.18302e-05	0.000318691
hsa-mir-7156	1.10898	-0.627141	12.0832	0.000508788	0.00147507
hsa-mir-760	1.17034	0.73603	18.3405	1.84733e-05	7.23026e-05
hsa-mir-7641-1	1.03426	-0.211318	6.59127	0.010248	0.0215836
hsa-mir-766	1.19382	3.19573	74.33	6.60909e-18	1.24163e-16
hsa-mir-767	5.59317	5.65664	50.657	1.10002e-12	1.2015e-11
hsa-mir-770	-1.12455	-0.999273	12.6568	0.000374199	0.00112901
hsa-mir-7702	1.53678	1.43587	21.7599	3.08998e-06	1.36482e-05
hsa-mir-7705	1.93314	0.705914	72.4997	1.67059e-17	2.94233e-16
hsa-mir-7706	1.2328	1.4684	56.4315	5.81917e-14	7.12975e-13
hsa-mir-7844	1.48225	-0.445321	21.9245	2.83592e-06	1.26051e-05
hsa-mir-7850	1.405	-0.522256	16.0916	6.03511e-05	0.00021748
hsa-mir-7854	1.86661	0.114122	58.6701	1.86451e-14	2.50199e-13
hsa-mir-7855	-1.27244	-1.19547	25.3441	4.79625e-07	2.56955e-06
hsa-mir-7973-2	-1.1954	-1.19669	22.4955	2.10633e-06	9.57359e-06
hsa-mir-7974	1.69684	0.494608	29.5106	5.56113e-08	3.43668e-07
hsa-mir-8072	1.53528	-0.704998	25.1995	5.16952e-07	2.73829e-06
hsa-mir-873	2.19705	-0.073476	20.1961	6.98966e-06	2.93983e-05
hsa-mir-876	2.53435	-0.671554	21.1202	4.31365e-06	1.8644e-05
hsa-mir-877	2.22551	1.75925	93.7244	3.6266e-22	9.82668e-21
hsa-mir-885	-2.6432	0.958206	81.5894	1.67507e-19	3.80674e-18
hsa-mir-888	-1.63771	-1.09283	10.938	0.000942128	0.00255772
hsa-mir-9-1	3.62077	10.7221	57.8096	2.88764e-14	3.73274e-13
hsa-mir-9-2	3.62068	10.7254	57.8187	2.87421e-14	3.73274e-13
hsa-mir-9-3	3.61816	10.7237	57.6451	3.1395e-14	3.98518e-13
hsa-mir-92a-1	1.01006	12.7861	63.4814	1.61889e-15	2.4527e-14
hsa-mir-92a-2	1.00537	12.6738	63.9889	1.25123e-15	1.91629e-14
hsa-mir-93	1.47373	12.7597	80.0001	3.74397e-19	7.99281e-18
hsa-mir-937	2.39091	2.2285	73.7745	8.75696e-18	1.60241e-16
hsa-mir-939	1.05594	0.723189	37.4638	9.3127e-10	7.1313e-09
hsa-mir-940	1.23201	2.25039	39.1261	3.97307e-10	3.23587e-09
hsa-mir-944	1.49594	7.80573	57.5265	3.33458e-14	4.19503e-13
hsa-mir-96	1.65487	4.43707	68.7474	1.11916e-16	1.85517e-15
hsa-mir-99a	-1.6743	9.02077	84.4669	3.90709e-20	9.65806e-19

## Sheet: KICH
miRNA	logFC	logCPM	LR	PValue	FDR
hsa-let-7c	-1.21839	10.7497	37.8213	7.75293e-10	9.99186e-09
hsa-mir-1-1	-2.64536	2.03747	101.179	8.40252e-24	3.86236e-22
hsa-mir-1-2	-2.50718	2.06953	93.6529	3.76005e-22	1.44031e-20
hsa-mir-1180	-1.34165	3.78819	46.5594	8.88828e-12	1.40884e-10
hsa-mir-122	1.45616	-0.392375	9.46092	0.00209896	0.0091308
hsa-mir-124-1	-1.90552	-1.10064	6.67046	0.0098024	0.0334592
hsa-mir-124-2	-1.83467	-1.20231	7.09599	0.00772565	0.0275289
hsa-mir-124-3	-1.69429	-1.09614	6.12238	0.0133481	0.0419295
hsa-mir-1245a	-1.52033	-0.909707	13.212	0.000278169	0.00154054
hsa-mir-1245b	-1.60744	-1.53241	13.0694	0.000300156	0.00164907
hsa-mir-1247	-2.49844	2.32782	29.69	5.06956e-08	5.25858e-07
hsa-mir-1251	-4.75975	2.6723	103.595	2.48253e-24	1.22265e-22
hsa-mir-1255a	1.28101	-0.860323	8.90803	0.00283919	0.0117929
hsa-mir-1258	3.58613	1.3331	69.2802	8.54234e-17	2.10355e-15
hsa-mir-1263	-1.23106	-1.62566	10.6059	0.00112729	0.00528754
hsa-mir-1269b	-6.85048	0.60593	75.1534	4.35533e-18	1.25125e-16
hsa-mir-1271	-1.29169	1.5959	39.1669	3.8909e-10	5.15919e-09
hsa-mir-1287	-1.57666	3.70904	96.6715	8.18377e-23	3.41982e-21
hsa-mir-129-1	-1.31064	4.52105	13.0025	0.000311071	0.00169552
hsa-mir-129-2	-1.48808	4.55694	16.1999	5.69967e-05	0.000367282
hsa-mir-1293	2.42118	-0.799712	17.8467	2.39432e-05	0.000165089
hsa-mir-1294	1.34956	-0.937875	12.3458	0.000441988	0.00232634
hsa-mir-1295a	-2.82134	-0.857839	54.6592	1.43349e-13	2.74554e-12
hsa-mir-1295b	-1.24595	-1.36101	6.64909	0.00992066	0.033696
hsa-mir-1304	2.25358	-0.43757	29.5173	5.54202e-08	5.66107e-07
hsa-mir-130a	-2.60357	5.50476	174.97	6.07672e-40	8.37979e-38
hsa-mir-132	-1.23952	6.38752	41.0723	1.46704e-10	2.04348e-09
hsa-mir-1323	2.77246	-1.33458	12.6162	0.000382409	0.00204079
hsa-mir-133a-1	-3.23446	1.33174	122.605	1.70168e-28	1.46664e-26
hsa-mir-133a-2	-3.23495	1.18125	127.827	1.22491e-29	1.29935e-27
hsa-mir-133b	-3.68362	0.0148683	122.805	1.53842e-28	1.41432e-26
hsa-mir-135a-1	-2.27043	1.97262	27.2278	1.80843e-07	1.7081e-06
hsa-mir-135a-2	-2.4516	2.2377	31.7763	1.72989e-08	1.98794e-07
hsa-mir-135b	-4.49371	1.84148	120.532	4.83753e-28	3.51103e-26
hsa-mir-136	-1.37048	4.03645	11.7339	0.000613715	0.00312293
hsa-mir-138-1	-1.81181	1.10447	6.34019	0.0118032	0.0379811
hsa-mir-138-2	-2.53167	0.809901	18.379	1.81046e-05	0.000126732
hsa-mir-141	2.18048	10.2182	31.3383	2.16766e-08	2.47042e-07
hsa-mir-143	-1.40522	15.3907	69.7637	6.68515e-17	1.67615e-15
hsa-mir-144	1.4301	8.58655	16.54	4.7635e-05	0.0003143
hsa-mir-145	-2.04704	9.94081	110.595	7.25998e-26	4.76739e-24
hsa-mir-1468	1.07256	4.98349	20.1123	7.30261e-06	5.50289e-05
hsa-mir-147b	-1.19008	-1.22101	6.2868	0.012164	0.0386503
hsa-mir-149	-1.3363	3.21675	27.8111	1.33754e-07	1.28088e-06
hsa-mir-15b	1.2714	7.89205	34.9852	3.32221e-09	3.94942e-08
hsa-mir-181a-1	-1.00452	9.30834	44.9893	1.98119e-11	3.061e-10
hsa-mir-181c	-1.47002	5.37826	70.5629	4.45819e-17	1.15997e-15
hsa-mir-181d	-1.619	2.90863	79.0599	6.02565e-19	1.93241e-17
hsa-mir-182	3.16921	14.3585	120.837	4.14796e-28	3.1778e-26
hsa-mir-183	2.68829	12.6114	94.4249	2.54571e-22	1.00301e-20
hsa-mir-184	-5.27448	2.88819	154.088	2.21531e-35	2.54576e-33
hsa-mir-185	1.61475	6.74327	91.4207	1.16155e-21	4.32912e-20
hsa-mir-187	2.98932	7.79803	41.1628	1.40064e-10	1.9709e-09
hsa-mir-190a	-2.2775	3.185	76.4685	2.23756e-18	6.70781e-17
hsa-mir-190b	-1.2752	-1.29296	11.0072	0.000907598	0.00440696
hsa-mir-1915	-1.26123	-1.58323	7.44237	0.0063706	0.0231796
hsa-mir-192	-3.91193	11.3372	264.689	1.63123e-59	5.62368e-57
hsa-mir-194-1	-3.51039	8.57061	211.046	8.12169e-48	1.39998e-45
hsa-mir-194-2	-3.56684	8.70574	220.022	8.9454e-50	1.76224e-47
hsa-mir-195	-1.83445	4.54139	95.9341	1.18773e-22	4.8173e-21
hsa-mir-196a-1	-1.49545	7.02588	28.5289	9.23081e-08	9.09235e-07
hsa-mir-196a-2	-1.48404	7.27745	28.2388	1.07232e-07	1.04136e-06
hsa-mir-199a-1	-2.25463	8.92744	49.4219	2.06431e-12	3.51442e-11
hsa-mir-199a-2	-2.26159	9.67714	51.1918	8.37699e-13	1.51998e-11
hsa-mir-199b	-2.23344	9.97499	50.5477	1.16301e-12	2.05614e-11
hsa-mir-200c	1.3957	11.8455	14.2211	0.000162539	0.000953792
hsa-mir-203a	-1.01178	10.1351	8.91528	0.00282795	0.0117817
hsa-mir-204	-3.28799	8.10743	42.3877	7.48582e-11	1.07531e-09
hsa-mir-205	-1.64733	2.14017	9.77932	0.00176486	0.00797947
hsa-mir-206	-4.82616	2.3061	81.5623	1.69826e-19	5.71194e-18
hsa-mir-2113	-1.03541	-1.6349	8.60884	0.00334536	0.0136084
hsa-mir-2115	1.05497	-1.58583	5.89602	0.0151752	0.0474525
hsa-mir-212	-1.47125	1.92212	40.3892	2.08084e-10	2.84107e-09
hsa-mir-214	-2.05512	3.09006	30.3737	3.56318e-08	3.8997e-07
hsa-mir-215	-2.07734	3.76579	37.6156	8.61509e-10	1.10002e-08
hsa-mir-216a	-3.08054	0.364901	37.028	1.16443e-09	1.45977e-08
hsa-mir-216b	-4.45994	-0.294712	66.4368	3.61288e-16	8.16747e-15
hsa-mir-217	-3.22361	5.12709	61.8192	3.76478e-15	7.63476e-14
hsa-mir-218-1	2.49989	6.708	47.7463	4.85104e-12	7.77859e-11
hsa-mir-218-2	2.54518	6.6507	50.4365	1.23081e-12	2.14847e-11
hsa-mir-219a-1	-1.3646	0.25829	38.0218	6.99597e-10	9.18805e-09
hsa-mir-22	1.03641	17.0577	107.794	2.98273e-25	1.78834e-23
hsa-mir-221	3.612	10.3331	310.176	1.99948e-69	9.5523e-67
hsa-mir-222	3.43606	8.28273	416.211	1.62999e-92	2.24776e-89
hsa-mir-2681	-1.05631	-1.61835	6.21594	0.0126605	0.0399515
hsa-mir-26b	-1.38573	8.2634	183.805	7.15506e-42	1.09631e-39
hsa-mir-27b	-1.197	10.4731	78.0257	1.0171e-18	3.1877e-17
hsa-mir-301a	-1.2839	2.0979	55.1366	1.12438e-13	2.18384e-12
hsa-mir-302a	-2.62714	-1.48042	35.619	2.3994e-09	2.90244e-08
hsa-mir-302b	-1.84359	-1.48341	15.8161	6.9807e-05	0.000443612
hsa-mir-302d	-1.55701	-1.60806	15.0121	0.000106822	0.000654698
hsa-mir-3065	-3.10292	4.52211	81.324	1.91589e-19	6.29051e-18
hsa-mir-3115	-1.32559	-1.59277	8.64247	0.00328416	0.0134387
hsa-mir-3117	-1.93783	-0.205314	31.7929	1.71514e-08	1.98755e-07
hsa-mir-3125	-1.2239	-1.42462	8.27842	0.0040119	0.016036
hsa-mir-3144	2.24393	-0.0930963	15.6525	7.61125e-05	0.000477087
hsa-mir-3151	3.34831	-1.04362	24.8858	6.08273e-07	5.44681e-06
hsa-mir-3152	4.70839	0.497758	62.6649	2.45045e-15	5.11995e-14
hsa-mir-3154	-3.37924	-1.36566	66.202	4.07006e-16	9.05261e-15
hsa-mir-3166	1.50825	-1.39857	7.534	0.00605455	0.0224441
hsa-mir-3178	-1.88264	-1.52047	18.3374	1.85037e-05	0.000128872
hsa-mir-3182	1.61666	-1.53419	11.2948	0.000777259	0.00386946
hsa-mir-3190	2.04965	-0.711753	25.5214	4.37492e-07	3.96909e-06
hsa-mir-3191	2.35483	-0.0503799	64.4168	1.00694e-15	2.16964e-14
hsa-mir-3193	-1.0467	-1.11705	8.13565	0.00434033	0.0169556
hsa-mir-320b-1	-1.00578	0.301835	15.5697	7.95207e-05	0.000496195
hsa-mir-320d-1	-1.45982	-1.25525	14.3997	0.000147827	0.000874908
hsa-mir-320d-2	-1.22172	-1.23193	8.30924	0.0039444	0.015812
hsa-mir-326	-1.32267	1.58419	47.9684	4.33153e-12	7.11092e-11
hsa-mir-335	-1.79847	4.47822	37.9629	7.21045e-10	9.38039e-09
hsa-mir-34c	1.34571	2.37469	8.20704	0.00417282	0.0164409
hsa-mir-3591	-2.29344	-1.55775	25.6927	4.00335e-07	3.65604e-06
hsa-mir-3616	-1.75669	-1.53497	14.6691	0.000128132	0.000768237
hsa-mir-3622a	-2.66552	-1.32206	43.6393	3.9483e-11	5.91815e-10
hsa-mir-3651	1.76103	-0.539912	19.5297	9.90489e-06	7.2269e-05
hsa-mir-3684	1.34908	-0.760646	14.775	0.000121129	0.000732619
hsa-mir-3688-2	1.55799	-1.33029	9.19494	0.00242686	0.0103293
hsa-mir-372	-2.19492	-0.65018	16.1732	5.78051e-05	0.000370759
hsa-mir-378d-1	-1.51311	-0.549599	19.9232	8.06157e-06	6.0418e-05
hsa-mir-378d-2	-1.55845	-0.381964	23.1525	1.4965e-06	1.27387e-05
hsa-mir-383	-1.8288	-1.55157	14.3098	0.000155053	0.000913751
hsa-mir-3909	1.22861	-0.289847	21.1314	4.28837e-06	3.32228e-05
hsa-mir-3917	-1.19572	-0.653648	12.7198	0.000361801	0.00194892
hsa-mir-3919	1.41732	-1.40885	7.42378	0.00643676	0.0233586
hsa-mir-3926-1	-2.46504	-1.189	49.7298	1.76446e-12	3.04149e-11
hsa-mir-3926-2	-2.41888	-1.10916	44.9729	1.99775e-11	3.061e-10
hsa-mir-3928	-1.34563	-0.0377435	27.0026	2.03187e-07	1.90609e-06
hsa-mir-3936	-1.92551	-1.42512	16.4416	5.01721e-05	0.000324964
hsa-mir-3944	-1.03384	-1.34561	6.4531	0.0110759	0.0362795
hsa-mir-4419b	-1.40991	-1.61642	12.7763	0.000351048	0.00189841
hsa-mir-4424	-1.74188	-1.19465	11.2429	0.000799299	0.00396487
hsa-mir-4443	1.072	-0.998019	5.86701	0.0154273	0.048023
hsa-mir-4445	-2.41189	-1.47208	11.1355	0.00084692	0.0041415
hsa-mir-4452	-1.01278	-1.62173	5.87527	0.015355	0.0479062
hsa-mir-4454	2.12056	-0.922664	14.0089	0.000181947	0.00105867
hsa-mir-4461	1.90559	0.865666	45.9141	1.23555e-11	1.93617e-10
hsa-mir-4470	-1.50507	-1.47784	12.1699	0.00048567	0.00252732
hsa-mir-4484	1.70652	1.90685	29.1536	6.68605e-08	6.72997e-07
hsa-mir-4487	1.40364	-1.50881	7.36026	0.00666812	0.0240209
hsa-mir-4488	1.36332	-1.56081	8.65198	0.00326706	0.0134086
hsa-mir-449a	-1.47836	-1.09914	10.3029	0.00132822	0.00616707
hsa-mir-4501	4.36476	1.56811	104.98	1.23355e-24	6.61687e-23
hsa-mir-450a-1	-1.07211	2.40681	26.4046	2.76877e-07	2.5625e-06
hsa-mir-450a-2	-1.0004	2.34751	22.0476	2.6597e-06	2.1324e-05
hsa-mir-4512	1.46465	-1.54042	9.57068	0.00197709	0.00872728
hsa-mir-4522	-1.26773	-1.45808	8.96595	0.00275058	0.011529
hsa-mir-4525	1.27065	-0.863946	8.62474	0.00331628	0.01353
hsa-mir-4526	-1.07528	-1.61615	6.28839	0.0121531	0.0386503
hsa-mir-4529	-1.95348	-1.42316	22.6907	1.90283e-06	1.59031e-05
hsa-mir-4536-2	1.07866	-1.08282	6.90293	0.00860547	0.0301958
hsa-mir-455	-2.67565	7.40145	69.7942	6.5825e-17	1.67615e-15
hsa-mir-4640	1.56767	-1.11321	13.2736	0.000269167	0.0014967
hsa-mir-4641	-1.07621	-1.63001	8.77181	0.00305921	0.012593
hsa-mir-4649	-2.21031	-1.33044	29.8196	4.74173e-08	5.02988e-07
hsa-mir-466	3.58376	-0.232764	28.4366	9.68184e-08	9.46898e-07
hsa-mir-4660	-1.33355	-1.13283	14.9808	0.000108612	0.000662727
hsa-mir-4661	1.87912	2.31086	40.914	1.5908e-10	2.19371e-09
hsa-mir-4662a	1.75587	6.23192	37.3792	9.72533e-10	1.23039e-08
hsa-mir-4666a	1.48528	-1.55016	9.68425	0.00185854	0.00834829
hsa-mir-4671	1.19667	-1.58057	7.31088	0.00685382	0.0246131
hsa-mir-4678	1.61563	-1.19708	7.91967	0.00489001	0.0187836
hsa-mir-4679-1	-1.55553	-1.57912	12.0015	0.00053158	0.00273526
hsa-mir-4699	2.40604	-0.540821	23.4425	1.28702e-06	1.13044e-05
hsa-mir-4701	-1.30448	-1.55635	7.83255	0.00513138	0.0194936
hsa-mir-4705	-1.80069	-1.52676	16.4408	5.01939e-05	0.000324964
hsa-mir-4710	-1.05954	-1.61928	6.30752	0.0120227	0.0385564
hsa-mir-4728	-1.05485	-0.45645	17.9122	2.31334e-05	0.000160306
hsa-mir-4732	1.82958	0.922156	20.5698	5.74962e-06	4.35644e-05
hsa-mir-4733	1.28946	-1.27373	7.90524	0.00492918	0.0188815
hsa-mir-4738	-1.17672	-1.308	8.23386	0.00411159	0.0162928
hsa-mir-4739	-1.09334	-1.62802	8.84205	0.00294368	0.0121537
hsa-mir-4758	1.17386	-0.716736	9.41838	0.00214821	0.00931568
hsa-mir-4768	-1.57013	-1.34162	15.7033	7.40946e-05	0.000468699
hsa-mir-4777	1.26969	-1.28275	7.97189	0.00475094	0.0183517
hsa-mir-4781	-1.03061	-1.06215	9.1949	0.0024269	0.0103293
hsa-mir-4791	-1.09704	-0.937982	11.5713	0.000669765	0.00338317
hsa-mir-4792	1.02789	-1.59478	5.84136	0.0156538	0.0486183
hsa-mir-4797	1.39588	-0.728155	11.339	0.000758956	0.00379203
hsa-mir-483	-4.007	1.96368	104.105	1.91845e-24	9.7983e-23
hsa-mir-486-1	1.4679	8.07296	16.8875	3.96616e-05	0.000264219
hsa-mir-486-2	1.44491	8.07169	16.4433	5.01281e-05	0.000324964
hsa-mir-497	-1.83526	3.73291	86.2389	1.59462e-20	5.6384e-19
hsa-mir-498	1.40183	-1.55782	6.60791	0.0101527	0.0340646
hsa-mir-499a	-1.04435	-0.602932	14.953	0.000110224	0.000669599
hsa-mir-5010	-1.01216	0.00899375	13.9361	0.000189128	0.0010867
hsa-mir-505	-1.21027	4.68251	59.547	1.19406e-14	2.38639e-13
hsa-mir-506	-3.13034	0.322546	52.8989	3.51172e-13	6.63379e-12
hsa-mir-507	-2.43599	-1.03909	26.7034	2.3721e-07	2.21022e-06
hsa-mir-508	-2.14631	5.59916	36.5302	1.50322e-09	1.86751e-08
hsa-mir-5089	1.46444	-1.55027	8.0988	0.00442946	0.0172063
hsa-mir-509-1	-2.01493	2.36686	30.338	3.62944e-08	3.94094e-07
hsa-mir-509-2	-1.97535	2.36177	31.263	2.25336e-08	2.54704e-07
hsa-mir-509-3	-2.04347	2.55987	32.3453	1.29072e-08	1.50839e-07
hsa-mir-510	-2.32835	-1.48689	22.4253	2.18473e-06	1.80404e-05
hsa-mir-5100	3.90309	-0.95957	18.4574	1.73749e-05	0.000122245
hsa-mir-512-1	3.10619	-1.06902	9.54982	0.00199969	0.00877161
hsa-mir-512-2	3.49989	-1.01937	9.53209	0.0020191	0.00881119
hsa-mir-513a-1	-1.51918	-1.37717	10.2569	0.00136174	0.00629742
hsa-mir-513a-2	-1.40095	-1.305	8.24495	0.00408655	0.0162402
hsa-mir-513b	-1.53528	-1.45087	9.0929	0.00256604	0.0108545
hsa-mir-513c	-2.22222	-0.848761	22.9659	1.64902e-06	1.39509e-05
hsa-mir-514a-1	-3.01369	3.63655	72.4794	1.68781e-17	4.65497e-16
hsa-mir-514a-2	-3.03498	3.65486	74.9149	4.91453e-18	1.38309e-16
hsa-mir-514a-3	-2.96847	3.6404	68.242	1.44609e-16	3.37994e-15
hsa-mir-514b	-5.16021	-0.165712	88.4344	5.25491e-21	1.90698e-19
hsa-mir-515-1	1.77282	-1.51353	8.5598	0.00343666	0.0139387
hsa-mir-515-2	2.0799	-1.46845	10.7589	0.0010378	0.00491794
hsa-mir-516a-1	3.07639	-1.25971	14.4386	0.000144803	0.000860706
hsa-mir-516b-1	1.94707	-1.42442	6.40969	0.0113499	0.036914
hsa-mir-516b-2	1.49283	-1.54562	8.35374	0.00384895	0.0155196
hsa-mir-517a	4.97354	-0.451434	17.8164	2.43273e-05	0.000166902
hsa-mir-517b	4.94514	-0.46878	16.9113	3.91681e-05	0.000262198
hsa-mir-517c	2.50997	-1.39117	12.5656	0.00039291	0.00208393
hsa-mir-518a-1	2.65794	-1.36331	9.73212	0.00181076	0.00816025
hsa-mir-518b	3.09589	-0.900209	9.35436	0.00222456	0.00958645
hsa-mir-518c	4.0309	-0.925381	20.6861	5.41084e-06	4.1224e-05
hsa-mir-518e	3.65642	-1.07705	16.0149	6.28454e-05	0.000401221
hsa-mir-518f	3.20109	-1.1006	9.32256	0.00226349	0.00972384
hsa-mir-5196	1.12952	-1.58104	6.71203	0.00957647	0.0330149
hsa-mir-519a-1	4.18311	-0.362153	13.8837	0.00019448	0.00111281
hsa-mir-519a-2	3.7198	-0.706133	8.17493	0.00424732	0.0166868
hsa-mir-519c	2.75002	-1.34737	8.02504	0.0046135	0.0178708
hsa-mir-519d	2.99471	-1.27973	13.9938	0.000183414	0.00106272
hsa-mir-520a	4.04927	-0.404324	21.3232	3.88016e-06	3.0402e-05
hsa-mir-520b	3.00029	-0.948738	6.41334	0.0113266	0.036914
hsa-mir-520d	2.64458	-1.36853	9.12135	0.00252643	0.0107199
hsa-mir-520f	3.32783	-1.19487	5.98731	0.0144091	0.0451595
hsa-mir-520g	2.6483	-1.36211	12.2353	0.000468939	0.00245881
hsa-mir-520h	2.18609	-1.4528	9.56717	0.00198088	0.00872728
hsa-mir-521-1	2.41449	-1.41568	7.45829	0.00631449	0.0231587
hsa-mir-522	3.56691	-1.11216	11.4555	0.000712844	0.00357459
hsa-mir-523	2.90722	-1.30592	13.0387	0.000305113	0.00166964
hsa-mir-524	1.76499	-1.5175	7.85602	0.00506519	0.0192953
hsa-mir-525	3.97962	-0.953219	15.4809	8.33418e-05	0.000517695
hsa-mir-526b	4.43888	-0.0245031	18.9582	1.33614e-05	9.64682e-05
hsa-mir-527	2.71495	-1.35251	9.65183	0.00189163	0.00844155
hsa-mir-542	-1.04502	8.34847	27.9445	1.24844e-07	1.20392e-06
hsa-mir-548ag-2	1.67634	0.0594452	6.5596	0.010432	0.0346643
hsa-mir-548ao	-1.35718	-1.60458	9.54617	0.00200367	0.00877161
hsa-mir-548aw	-1.72234	-1.00463	29.9434	4.44851e-08	4.75542e-07
hsa-mir-548b	-1.15922	-0.199157	14.0853	0.000174706	0.00102084
hsa-mir-548ba	-2.55872	-1.3045	35.4618	2.60098e-09	3.11892e-08
hsa-mir-548j	1.46786	-0.362816	19.6405	9.34691e-06	6.89272e-05
hsa-mir-548n	1.65971	-1.41676	9.89281	0.00165926	0.00757654
hsa-mir-548q	-1.02509	-1.25001	6.24733	0.012438	0.039352
hsa-mir-550a-2	1.01529	0.941945	21.1769	4.1879e-06	3.26278e-05
hsa-mir-551a	-1.05934	-0.928332	9.56916	0.00197873	0.00872728
hsa-mir-552	1.99075	-0.904589	11.0735	0.000875708	0.00426714
hsa-mir-5588	-1.49312	-1.02239	23.31	1.37883e-06	1.20342e-05
hsa-mir-5589	-3.8404	-1.29957	63.4719	1.62674e-15	3.45119e-14
hsa-mir-5590	-1.42846	-1.57414	6.24677	0.012442	0.039352
hsa-mir-561	2.26661	1.61983	67.8809	1.73673e-16	3.99158e-15
hsa-mir-5682	4.86757	-0.247069	51.6855	6.51418e-13	1.19774e-11
hsa-mir-5694	1.6474	-1.52924	7.95507	0.0047953	0.0184713
hsa-mir-5698	-1.15709	-0.970717	6.50697	0.0107452	0.035534
hsa-mir-5703	-1.48447	-1.27716	16.733	4.30264e-05	0.000285257
hsa-mir-5708	-2.68628	-1.16517	44.2773	2.84996e-11	4.31879e-10
hsa-mir-582	2.53918	9.72185	126.263	2.69311e-29	2.65271e-27
hsa-mir-584	1.12705	5.30455	22.3806	2.23626e-06	1.8356e-05
hsa-mir-585	-1.77076	-0.0765931	40.0745	2.44462e-10	3.30503e-09
hsa-mir-592	1.01337	2.08721	5.82442	0.0158052	0.0489784
hsa-mir-598	1.14425	5.50819	29.7099	5.01792e-08	5.25858e-07
hsa-mir-599	-2.32064	-1.4013	23.4771	1.26409e-06	1.11742e-05
hsa-mir-607	1.20477	-0.545222	10.3684	0.00128193	0.00597225
hsa-mir-615	-1.88674	2.72114	48.9968	2.56378e-12	4.31153e-11
hsa-mir-616	1.75274	2.44748	72.3277	1.82273e-17	4.92853e-16
hsa-mir-618	2.75389	2.14575	102.431	4.46747e-24	2.12436e-22
hsa-mir-642a	1.22443	2.41818	6.65605	0.00988199	0.0336476
hsa-mir-6502	-1.35361	-0.979197	21.3629	3.80054e-06	2.99482e-05
hsa-mir-6505	1.45547	-1.3274	7.04596	0.00794444	0.0280907
hsa-mir-6506	-1.28192	-1.54652	7.88354	0.00498867	0.0190565
hsa-mir-6507	-4.13895	-0.705911	99.8332	1.65785e-23	7.37477e-22
hsa-mir-6508	1.29629	-1.30903	7.18971	0.00733229	0.0262629
hsa-mir-651	2.83059	3.85687	56.3133	6.17965e-14	1.21739e-12
hsa-mir-653	1.55073	6.87365	7.4689	0.00627739	0.0231466
hsa-mir-670	-1.2067	-1.58262	6.9141	0.00855188	0.0300843
hsa-mir-671	1.00035	2.75048	43.2702	4.76793e-11	7.06986e-10
hsa-mir-6715a	2.91752	1.0722	48.23	3.79052e-12	6.29774e-11
hsa-mir-6716	-1.89021	-0.657465	51.8287	6.05604e-13	1.12855e-11
hsa-mir-6718	-1.2777	-0.514885	9.86502	0.00168451	0.00766162
hsa-mir-6726	-1.06016	-1.35818	6.71393	0.00956625	0.0330149
hsa-mir-6739	-1.59888	-1.55757	11.1605	0.000835566	0.00410052
hsa-mir-6746	-1.19507	-1.56386	6.43502	0.0111892	0.0365638
hsa-mir-675	-4.29755	5.5318	242.95	8.94492e-55	2.46701e-52
hsa-mir-6761	-2.38655	-0.629386	61.9493	3.52417e-15	7.25349e-14
hsa-mir-6762	-2.17941	-1.37148	28.6036	8.88154e-08	8.81125e-07
hsa-mir-6772	-1.89785	-1.43769	19.1108	1.23346e-05	8.95232e-05
hsa-mir-6778	-1.56535	-1.57649	11.199	0.000818429	0.00403076
hsa-mir-6784	-1.59644	-1.59216	13.4221	0.000248684	0.0013884
hsa-mir-6795	1.13866	-1.58142	6.49198	0.0108362	0.0357492
hsa-mir-6815	-1.18064	-0.168434	22.8568	1.7453e-06	1.46755e-05
hsa-mir-6821	1.49735	-1.16044	9.27255	0.00232614	0.00996194
hsa-mir-6822	-1.23446	-1.60746	8.16511	0.00427039	0.0167297
hsa-mir-6833	-1.12264	-1.17148	11.7049	0.000623354	0.00316031
hsa-mir-6863	-4.57405	-1.11509	76.7724	1.91841e-18	5.87886e-17
hsa-mir-6868	-1.28074	-1.05473	11.2011	0.000817486	0.00403076
hsa-mir-6872	-1.22303	-1.62675	10.6865	0.00107922	0.00509675
hsa-mir-6875	-1.00563	-1.21193	7.46403	0.0062944	0.0231466
hsa-mir-6883	-1.05317	-1.42442	6.2959	0.0121018	0.0386503
hsa-mir-6888	-1.05154	-1.39398	6.5871	0.010272	0.0343656
hsa-mir-6891	1.58733	-1.32936	9.65967	0.00188357	0.00843328
hsa-mir-6892	-1.26741	0.142939	24.7796	6.42749e-07	5.71839e-06
hsa-mir-7-3	1.37765	-1.36869	6.48166	0.0108993	0.0358715
hsa-mir-7155	1.1457	-1.14217	6.88737	0.00868067	0.0303823
hsa-mir-7156	-1.08644	-1.61276	6.40512	0.0113792	0.0369221
hsa-mir-7641-1	5.864	1.70406	36.4033	1.60431e-09	1.97531e-08
hsa-mir-7641-2	6.02226	1.1491	32.7625	1.04133e-08	1.22735e-07
hsa-mir-766	1.059	3.66709	28.7492	8.23822e-08	8.23225e-07
hsa-mir-7846	-1.2724	-1.32533	10.8646	0.000980179	0.00469329
hsa-mir-874	3.30573	8.02544	225.562	5.5373e-51	1.27266e-48
hsa-mir-875	-1.22115	-1.62664	10.5462	0.0011643	0.00544261
hsa-mir-885	4.05981	4.20672	64.9752	7.58453e-16	1.66017e-14
hsa-mir-887	-2.11122	1.63573	83.324	6.96484e-20	2.40113e-18
hsa-mir-888	6.68337	6.13694	104.958	1.24756e-24	6.61687e-23
hsa-mir-890	5.93969	2.45917	75.688	3.32226e-18	9.74765e-17
hsa-mir-891a	7.96449	13.726	154.168	2.12809e-35	2.54576e-33
hsa-mir-891b	6.93158	5.64435	107.583	3.31644e-25	1.90557e-23
hsa-mir-892a	6.9741	7.24899	112.603	2.63658e-26	1.81792e-24
hsa-mir-892b	7.61537	4.91058	120.934	3.9506e-28	3.1778e-26
hsa-mir-892c	6.7951	3.70295	97.6945	4.88165e-23	2.10369e-21
hsa-mir-934	-6.88754	1.64939	310.099	2.07809e-69	9.5523e-67
hsa-mir-942	1.04935	2.07949	23.2201	1.44478e-06	1.25305e-05
hsa-mir-943	-1.1322	-1.40937	6.4716	0.0109612	0.0359892
hsa-mir-944	2.2381	-0.527331	20.9171	4.79583e-06	3.67414e-05
hsa-mir-95	-2.02024	0.74763	70.976	3.61601e-17	9.58937e-16
hsa-mir-96	2.96004	4.81908	109.874	1.04439e-25	6.54642e-24

## Sheet: KIRC
miRNA	logFC	logCPM	LR	PValue	FDR
hsa-let-7b	1.03396	13.7849	151.497	8.16156e-35	2.01561e-33
hsa-mir-1-1	-1.54815	2.81159	99.488	1.97357e-23	3.10164e-22
hsa-mir-1-2	-1.49114	2.8846	91.371	1.19108e-21	1.7159e-20
hsa-mir-106b	1.41326	8.30263	356.84	1.37308e-79	1.42435e-77
hsa-mir-10a	-1.005	15.1151	97.4845	5.42801e-23	8.34104e-22
hsa-mir-122	6.59162	4.69941	356.742	1.44186e-79	1.42435e-77
hsa-mir-1224	1.64358	-0.138666	25.3931	4.67599e-07	2.40405e-06
hsa-mir-1228	1.8702	0.567413	69.7301	6.79993e-17	7.64578e-16
hsa-mir-124-2	-1.08708	-0.310802	14.9087	0.000112842	0.000427562
hsa-mir-124-3	-1.01614	-0.302335	14.418	0.000146398	0.000547212
hsa-mir-1250	1.28848	-0.435206	21.152	4.24266e-06	1.91752e-05
hsa-mir-1251	-1.99492	3.35504	69.3586	8.20921e-17	9.08267e-16
hsa-mir-1269a	2.18754	8.00489	16.5777	4.66978e-05	0.00018746
hsa-mir-1269b	3.05299	4.5325	13.1402	0.000289033	0.00103452
hsa-mir-1270	1.99208	4.26724	103.691	2.36501e-24	4.14026e-23
hsa-mir-1271	1.62336	3.49105	106.297	6.34803e-25	1.20265e-23
hsa-mir-1277	1.18981	1.40261	61.8749	3.65988e-15	3.64145e-14
hsa-mir-1285-1	1.43031	-0.428961	21.3762	3.77429e-06	1.73417e-05
hsa-mir-129-1	-3.6451	1.84943	330.879	6.18624e-74	4.7531e-72
hsa-mir-129-2	-3.36731	1.92185	266.18	7.7193e-60	4.27032e-58
hsa-mir-1293	4.10411	0.640928	72.7814	1.44832e-17	1.68322e-16
hsa-mir-1295a	1.49536	0.572871	40.7206	1.75628e-10	1.19652e-09
hsa-mir-1304	1.04386	-0.0298431	8.37476	0.00380468	0.0108047
hsa-mir-1305	1.24699	-0.235557	12.4072	0.000427679	0.00145685
hsa-mir-130b	1.23318	3.78293	103.602	2.47311e-24	4.27539e-23
hsa-mir-135a-1	-1.36822	3.22513	40.0589	2.46418e-10	1.67057e-09
hsa-mir-135a-2	-1.42386	3.34563	42.8303	5.96989e-11	4.27791e-10
hsa-mir-136	-1.03358	3.89455	49.9353	1.58897e-12	1.28512e-11
hsa-mir-137	2.2594	0.511546	7.42955	0.00641613	0.0172973
hsa-mir-138-1	-2.24984	1.16637	68.7391	1.12392e-16	1.23363e-15
hsa-mir-138-2	-1.9976	0.860296	65.255	6.58086e-16	6.89494e-15
hsa-mir-141	-2.34749	6.26326	75.3246	3.99351e-18	4.80263e-17
hsa-mir-142	2.15729	11.6112	163.015	2.48252e-37	6.73201e-36
hsa-mir-144	2.19686	8.69661	94.3696	2.61781e-22	3.93525e-21
hsa-mir-146a	1.31275	6.57962	81.0541	2.19627e-19	2.83873e-18
hsa-mir-146b	1.64327	9.51856	71.7544	2.4372e-17	2.78566e-16
hsa-mir-147b	1.42296	-0.0152744	23.8528	1.03992e-06	5.04636e-06
hsa-mir-149	-1.37801	3.62148	99.5618	1.90141e-23	3.02259e-22
hsa-mir-151b	1.08142	2.31007	77.507	1.3225e-18	1.63305e-17
hsa-mir-153-1	1.18244	0.409433	24.3303	8.11504e-07	3.99661e-06
hsa-mir-153-2	1.44224	3.46565	59.8958	1.00014e-14	9.67269e-14
hsa-mir-1537	1.0691	-0.061596	16.8479	4.04986e-05	0.000164703
hsa-mir-155	3.74495	9.33288	279.288	1.07316e-62	6.74629e-61
hsa-mir-15a	1.3866	7.18805	325.393	9.68651e-73	6.69822e-71
hsa-mir-16-1	1.29038	8.48847	220.874	5.82985e-50	2.68756e-48
hsa-mir-16-2	1.29611	8.49752	218.988	1.50365e-49	6.70821e-48
hsa-mir-181a-1	1.1031	9.75524	137.042	1.18052e-31	2.6765e-30
hsa-mir-181b-1	1.47398	7.42994	209.643	1.64319e-47	6.68392e-46
hsa-mir-181b-2	1.44975	7.29072	188.353	7.27685e-43	2.51597e-41
hsa-mir-181d	1.04533	3.53277	58.2964	2.25454e-14	2.12111e-13
hsa-mir-184	-3.08405	1.82667	62.6751	2.43773e-15	2.47896e-14
hsa-mir-185	1.02735	5.63908	104.345	1.70017e-24	3.05368e-23
hsa-mir-187	-1.18733	4.30467	19.2232	1.16292e-05	5.0896e-05
hsa-mir-188	-1.72584	2.37063	246.35	1.62259e-55	8.01445e-54
hsa-mir-18a	1.2205	2.95988	78.3156	8.78274e-19	1.10423e-17
hsa-mir-1910	1.68426	-0.270785	24.6079	7.02642e-07	3.54655e-06
hsa-mir-193a	1.12127	7.78824	147.839	5.1454e-34	1.24844e-32
hsa-mir-199a-1	-1.05155	8.90292	69.7392	6.76873e-17	7.64578e-16
hsa-mir-199a-2	-1.00387	9.63226	62.7882	2.30177e-15	2.35804e-14
hsa-mir-19a	1.03379	4.34534	80.0189	3.70838e-19	4.74878e-18
hsa-mir-200a	-1.1978	8.15577	172.508	2.0966e-39	6.04084e-38
hsa-mir-200b	-1.35899	7.78225	188.723	6.04015e-43	2.14193e-41
hsa-mir-200c	-3.05403	8.43272	186.924	1.49177e-42	4.91219e-41
hsa-mir-203a	-1.6078	9.11235	120.974	3.87133e-28	7.7595e-27
hsa-mir-203b	-2.32791	2.64789	90.5615	1.79314e-21	2.55661e-20
hsa-mir-204	-1.42257	8.72594	67.5514	2.05269e-16	2.23533e-15
hsa-mir-21	2.33197	17.4237	346.186	2.86942e-77	2.48025e-75
hsa-mir-210	3.44214	11.6575	387.389	3.06367e-86	3.53087e-84
hsa-mir-2114	1.13949	1.07986	20.2689	6.72841e-06	3.01145e-05
hsa-mir-214	-1.09754	3.19703	58.1762	2.39664e-14	2.22453e-13
hsa-mir-215	1.85316	6.35923	66.6157	3.29948e-16	3.53735e-15
hsa-mir-216b	-3.15453	0.307384	72.3651	1.78853e-17	2.06129e-16
hsa-mir-217	-1.29827	5.86894	35.9986	1.97464e-09	1.25272e-08
hsa-mir-219a-2	1.69181	-0.242713	21.4531	3.62595e-06	1.67715e-05
hsa-mir-221	1.12252	6.96755	38.2584	6.19693e-10	4.06178e-09
hsa-mir-223	1.16783	7.05131	59.2833	1.36532e-14	1.29332e-13
hsa-mir-224	2.68309	5.16511	181.928	1.83852e-41	5.65038e-40
hsa-mir-2277	1.63487	1.21404	93.969	3.20504e-22	4.76621e-21
hsa-mir-2355	1.72757	6.09112	348.591	8.58781e-78	7.91796e-76
hsa-mir-23a	1.05018	11.422	197.057	9.16416e-45	3.42542e-43
hsa-mir-23c	1.04272	-0.0559313	10.3983	0.00126132	0.00399177
hsa-mir-25	1.16131	12.2211	240.573	2.94964e-54	1.40668e-52
hsa-mir-301b	1.59061	0.487878	51.0058	9.20957e-13	7.58145e-12
hsa-mir-302a	-1.29779	-0.544944	35.8678	2.11173e-09	1.33357e-08
hsa-mir-302b	-1.60904	-0.536836	50.3496	1.28658e-12	1.04667e-11
hsa-mir-3065	-1.10821	4.93841	36.3122	1.68106e-09	1.07635e-08
hsa-mir-3130-1	1.59726	1.49112	89.099	3.75535e-21	5.24612e-20
hsa-mir-3130-2	1.61114	1.51825	100.99	9.24433e-24	1.50411e-22
hsa-mir-3136	1.30856	-0.0186352	29.0924	6.90064e-08	3.87951e-07
hsa-mir-3154	-1.73325	-0.517716	59.9681	9.64075e-15	9.38955e-14
hsa-mir-3170	1.19401	2.72188	62.6359	2.48682e-15	2.51041e-14
hsa-mir-3174	1.32706	-0.312043	23.3234	1.36925e-06	6.52989e-06
hsa-mir-3189	1.01376	-0.251707	15.2249	9.54343e-05	0.000365611
hsa-mir-3190	1.89263	-0.064385	52.6229	4.0415e-13	3.42908e-12
hsa-mir-3191	1.73835	0.242333	59.733	1.08642e-14	1.04342e-13
hsa-mir-3194	1.14115	-0.152481	20.803	5.0903e-06	2.29312e-05
hsa-mir-320c-1	1.59314	0.238114	65.4565	5.94124e-16	6.27232e-15
hsa-mir-320d-1	1.14122	0.185184	26.4275	2.73617e-07	1.43883e-06
hsa-mir-320d-2	1.56728	0.15763	45.8844	1.2544e-11	9.32705e-11
hsa-mir-320e	1.17282	-0.167092	18.8964	1.38013e-05	5.98347e-05
hsa-mir-323b	-1.24839	1.78957	39.3518	3.53927e-10	2.37612e-09
hsa-mir-330	1.19811	4.03944	152.448	5.05828e-35	1.29548e-33
hsa-mir-33b	1.58507	1.78139	57.925	2.72307e-14	2.51067e-13
hsa-mir-342	1.30302	7.22493	123.472	1.09933e-28	2.26921e-27
hsa-mir-34a	1.04043	7.84116	97.2529	6.10154e-23	9.27299e-22
hsa-mir-34b	1.11152	0.8366	11.5821	0.000665912	0.00218754
hsa-mir-34c	1.17185	2.27526	17.6786	2.61558e-05	0.000108629
hsa-mir-3591	2.32259	0.180256	61.3258	4.83689e-15	4.77816e-14
hsa-mir-3609	2.50818	0.673613	24.5051	7.41123e-07	3.72717e-06
hsa-mir-3613	1.8919	4.10842	278.706	1.43757e-62	8.64415e-61
hsa-mir-3614	1.48846	0.600524	56.9189	4.54164e-14	4.10529e-13
hsa-mir-3615	1.82938	1.35739	103.022	3.31527e-24	5.66052e-23
hsa-mir-3617	1.14516	-0.443447	10.7	0.00107137	0.00342988
hsa-mir-362	-2.4111	4.50363	477.682	6.82554e-106	1.04886e-103
hsa-mir-363	-1.64627	3.88882	179.172	7.34805e-41	2.1622e-39
hsa-mir-3653	1.04908	4.59033	27.3948	1.65875e-07	8.92626e-07
hsa-mir-3654	1.8132	-0.319679	31.9683	1.56711e-08	9.22264e-08
hsa-mir-365a	1.23734	6.00906	101.07	8.87801e-24	1.4617e-22
hsa-mir-365b	1.24195	6.01181	102.514	4.28371e-24	7.22484e-23
hsa-mir-3662	1.34003	-0.35751	16.2596	5.5228e-05	0.000219484
hsa-mir-3678	2.04148	0.450874	78.5429	7.82804e-19	9.93227e-18
hsa-mir-3680-1	1.07453	-0.332546	16.7363	4.2952e-05	0.000173186
hsa-mir-3681	1.40029	-0.400971	15.3293	9.03059e-05	0.00034984
hsa-mir-3690-1	1.60618	0.461024	41.0668	1.47111e-10	1.01728e-09
hsa-mir-3691	1.06651	-0.393777	12.9295	0.000323439	0.00113821
hsa-mir-372	-2.1987	-0.148479	74.3316	6.60366e-18	7.80587e-17
hsa-mir-374a	1.13256	9.69898	254.266	3.05096e-57	1.62288e-55
hsa-mir-374c	3.00292	1.84683	47.394	5.80606e-12	4.5366e-11
hsa-mir-376a-1	-1.12178	0.424926	24.4008	7.82371e-07	3.90621e-06
hsa-mir-3920	1.41758	-0.208662	27.0085	2.02563e-07	1.07748e-06
hsa-mir-3922	1.26629	0.213423	32.1366	1.43707e-08	8.51085e-08
hsa-mir-3934	1.01863	0.576623	30.2448	3.8082e-08	2.21292e-07
hsa-mir-3940	1.62011	0.458656	41.0501	1.48376e-10	1.02091e-09
hsa-mir-3941	2.52641	0.900433	167.462	2.65128e-38	7.33345e-37
hsa-mir-3942	1.1427	-0.206098	21.436	3.65835e-06	1.6865e-05
hsa-mir-429	-1.74049	5.21796	271.466	5.43883e-61	3.13412e-59
hsa-mir-433	-1.43669	0.277357	56.9048	4.57423e-14	4.1079e-13
hsa-mir-4422	1.76072	-0.297492	17.0594	3.62286e-05	0.000147822
hsa-mir-4433a	1.27629	-0.32596	12.8261	0.000341816	0.00119076
hsa-mir-4434	1.52514	-0.350642	27.7085	1.41042e-07	7.70995e-07
hsa-mir-4454	2.57427	0.0677525	24.3416	8.06786e-07	3.99661e-06
hsa-mir-4484	-1.19418	0.365508	21.4848	3.56643e-06	1.65516e-05
hsa-mir-451a	1.76668	10.2841	58.2749	2.27937e-14	2.12997e-13
hsa-mir-452	2.18228	6.0748	203.573	3.46795e-46	1.33227e-44
hsa-mir-4524a	-1.08329	-0.475951	15.215	9.59382e-05	0.000366526
hsa-mir-4536-1	1.18485	-0.159016	25.3393	4.80812e-07	2.45374e-06
hsa-mir-4643	1.10244	-0.477719	11.824	0.000584722	0.00194392
hsa-mir-4645	1.04108	0.198577	27.4791	1.588e-07	8.57893e-07
hsa-mir-4652	3.36471	1.11624	83.495	6.38782e-20	8.49457e-19
hsa-mir-4658	1.23865	-0.418746	12.885	0.000331218	0.00115675
hsa-mir-466	1.84085	-0.203031	9.3976	0.00217269	0.00660404
hsa-mir-4661	1.02155	1.82365	55.0961	1.14778e-13	9.92116e-13
hsa-mir-4677	1.35285	2.91321	188.248	7.66798e-43	2.58654e-41
hsa-mir-4695	-1.43194	-0.536552	41.4774	1.19239e-10	8.28681e-10
hsa-mir-4705	1.11914	-0.231369	14.7604	0.000122072	0.000461272
hsa-mir-4732	1.31657	0.667419	24.1476	8.92258e-07	4.3604e-06
hsa-mir-4745	1.25767	-0.250804	20.5969	5.66881e-06	2.54544e-05
hsa-mir-4746	1.61877	0.754559	77.7143	1.19077e-18	1.48363e-17
hsa-mir-4756	-1.06311	-0.571987	31.3386	2.16724e-08	1.27004e-07
hsa-mir-4758	1.82343	-0.12241	42.5056	7.04808e-11	4.99871e-10
hsa-mir-4770	1.48623	-0.298045	10.3558	0.00129071	0.00407547
hsa-mir-4772	2.27521	2.35262	211.395	6.81746e-48	2.85713e-46
hsa-mir-4773-1	3.77766	0.179638	143.235	5.22099e-33	1.24494e-31
hsa-mir-4773-2	3.84434	0.209093	140.183	2.42765e-32	5.69058e-31
hsa-mir-4777	1.42499	-0.225756	28.1114	1.14528e-07	6.33569e-07
hsa-mir-4784	2.48278	0.0243274	35.2318	2.92703e-09	1.82346e-08
hsa-mir-486-1	1.47172	7.09057	45.0569	1.91393e-11	1.41549e-10
hsa-mir-486-2	1.50341	7.08802	46.9792	7.17454e-12	5.51244e-11
hsa-mir-4999	1.33726	0.597975	51.0831	8.85387e-13	7.33228e-12
hsa-mir-5000	1.19637	1.77075	99.6799	1.7913e-23	2.88067e-22
hsa-mir-5003	1.43334	-0.0549457	37.7547	8.02251e-10	5.20898e-09
hsa-mir-500a	-1.34735	8.21536	250.723	1.80661e-56	9.25384e-55
hsa-mir-500b	-1.02644	2.96703	98.0118	4.15893e-23	6.46269e-22
hsa-mir-501	-1.11792	6.21514	134.503	4.24013e-31	9.30809e-30
hsa-mir-506	-5.76986	0.828689	692.576	1.23064e-152	4.25495e-150
hsa-mir-507	-4.5374	-0.209802	320.293	1.25026e-71	8.23387e-70
hsa-mir-508	-4.43335	5.4639	862.547	1.36111e-189	1.88242e-186
hsa-mir-509-1	-3.08853	2.0869	414.284	4.28195e-92	5.38358e-90
hsa-mir-509-2	-3.10949	2.12145	461.177	2.66584e-102	3.68686e-100
hsa-mir-509-3	-3.34102	2.29773	495.219	1.04289e-109	1.80289e-107
hsa-mir-5090	1.27258	-0.366169	17.0591	3.62341e-05	0.000147822
hsa-mir-510	-2.79703	-0.493169	136.159	1.84217e-31	4.10923e-30
hsa-mir-513a-1	-2.93808	-0.423219	133.852	5.88517e-31	1.27175e-29
hsa-mir-513a-2	-2.90909	-0.456186	105.761	8.3186e-25	1.53395e-23
hsa-mir-513b	-2.54961	-0.432113	64.3563	1.03836e-15	1.07168e-14
hsa-mir-513c	-3.66747	-0.133237	191.447	1.53631e-43	5.59134e-42
hsa-mir-514a-1	-4.40652	3.55207	700.995	1.81683e-154	1.25634e-151
hsa-mir-514a-2	-4.37872	3.55436	655.659	1.31339e-144	3.63284e-142
hsa-mir-514a-3	-4.42875	3.55069	696.76	1.51412e-153	6.98007e-151
hsa-mir-514b	-6.16062	0.450463	559.321	1.18092e-123	2.33316e-121
hsa-mir-526b	1.26756	-0.373357	7.27134	0.00700634	0.0187061
hsa-mir-532	-1.06707	9.84005	152.923	3.98191e-35	1.03905e-33
hsa-mir-548f-1	1.97984	-0.393318	13.2473	0.000272974	0.000983134
hsa-mir-548j	1.18245	-0.220045	17.6241	2.69156e-05	0.00011145
hsa-mir-548o-2	1.7213	-0.214003	46.0867	1.13132e-11	8.45736e-11
hsa-mir-550a-1	1.21062	1.60674	67.4573	2.15299e-16	2.32623e-15
hsa-mir-550a-2	1.10111	1.55518	55.5632	9.05017e-14	7.87194e-13
hsa-mir-550a-3	1.35381	0.958587	60.2728	8.258e-15	8.09986e-14
hsa-mir-552	1.0496	-0.25746	10.4543	0.00122364	0.00389034
hsa-mir-556	-1.04944	-0.328746	18.4081	1.78301e-05	7.58741e-05
hsa-mir-5584	1.21288	-0.485274	21.3388	3.84861e-06	1.76246e-05
hsa-mir-5586	1.60984	1.82016	84.9987	2.9856e-20	4.00882e-19
hsa-mir-5588	1.49524	0.771959	59.4654	1.24466e-14	1.18715e-13
hsa-mir-559	-1.00815	-0.532785	18.6978	1.53161e-05	6.55794e-05
hsa-mir-5683	1.23353	1.44878	29.8176	4.74673e-08	2.7127e-07
hsa-mir-5687	1.25738	0.254201	41.5703	1.13705e-10	7.94215e-10
hsa-mir-5690	1.01253	-0.124005	18.102	2.09384e-05	8.80177e-05
hsa-mir-5699	1.02341	0.530761	33.7751	6.18661e-09	3.75267e-08
hsa-mir-5708	-1.71604	-0.415691	52.1415	5.16415e-13	4.35489e-12
hsa-mir-576	1.2665	3.78911	171.118	4.21621e-39	1.19e-37
hsa-mir-580	1.25095	-0.0568302	32.1326	1.44001e-08	8.51085e-08
hsa-mir-584	2.37306	5.62409	343.26	1.24412e-76	1.01213e-74
hsa-mir-587	1.05416	-0.502675	18.7041	1.5265e-05	6.55636e-05
hsa-mir-590	1.18678	4.44602	152.299	5.45223e-35	1.37099e-33
hsa-mir-592	3.25578	4.67957	184.816	4.30474e-42	1.35306e-40
hsa-mir-597	1.31036	-0.395203	18.8764	1.39468e-05	6.02765e-05
hsa-mir-599	3.66244	2.77725	40.9185	1.58714e-10	1.08664e-09
hsa-mir-607	1.31258	-0.00543399	24.3804	7.90703e-07	3.9336e-06
hsa-mir-612	1.10962	-0.42167	11.6238	0.000651116	0.00214403
hsa-mir-616	1.47232	2.63275	105.329	1.03434e-24	1.88223e-23
hsa-mir-618	1.53975	1.05881	49.3207	2.17356e-12	1.74769e-11
hsa-mir-624	1.04254	0.914757	44.5999	2.417e-11	1.77804e-10
hsa-mir-625	1.34328	6.64307	110.71	6.84794e-26	1.31537e-24
hsa-mir-629	1.7729	6.2444	327.333	3.66198e-73	2.66554e-71
hsa-mir-643	1.33824	0.385001	55.8506	7.81922e-14	6.84429e-13
hsa-mir-6499	-1.25378	-0.548145	32.4909	1.19749e-08	7.1694e-08
hsa-mir-6503	1.17679	0.371091	35.8481	2.13314e-09	1.34097e-08
hsa-mir-6507	-1.88787	-0.371596	57.5484	3.29764e-14	3.00042e-13
hsa-mir-6509	2.24659	1.19371	155.851	9.12323e-36	2.42643e-34
hsa-mir-6512	-1.24506	-0.549012	27.6717	1.43753e-07	7.8272e-07
hsa-mir-653	1.58226	6.96427	47.1384	6.6148e-12	5.13947e-11
hsa-mir-660	-1.42374	5.46386	207.956	3.83508e-47	1.5154e-45
hsa-mir-665	-1.18063	-0.275392	29.2204	6.45962e-08	3.64639e-07
hsa-mir-6718	1.67161	1.49672	23.3396	1.35777e-06	6.49755e-06
hsa-mir-6720	1.62223	-0.351248	18.0182	2.18808e-05	9.17006e-05
hsa-mir-6723	-1.44518	-0.372037	33.9045	5.78843e-09	3.52661e-08
hsa-mir-6728	1.17719	-0.399742	15.2737	9.30013e-05	0.000358275
hsa-mir-675	-1.26428	5.91001	27.3187	1.72538e-07	9.24887e-07
hsa-mir-6774	1.2539	-0.385002	18.1034	2.09227e-05	8.80177e-05
hsa-mir-6783	1.26565	-0.406746	19.8011	8.59324e-06	3.79695e-05
hsa-mir-6788	1.41271	-0.0748414	30.4949	3.3475e-08	1.95342e-07
hsa-mir-6843	1.0991	-0.0844952	19.5371	9.86659e-06	4.3457e-05
hsa-mir-6854	1.43279	0.154868	34.0062	5.49354e-09	3.3767e-08
hsa-mir-6863	-2.28765	-0.437968	25.0353	5.62891e-07	2.86205e-06
hsa-mir-6891	1.64031	-0.235969	27.6264	1.47157e-07	7.9811e-07
hsa-mir-708	1.09662	6.52759	44.4682	2.58529e-11	1.89177e-10
hsa-mir-7110	1.46868	0.246959	38.4382	5.65153e-10	3.72194e-09
hsa-mir-7152	1.1497	-0.461467	12.7984	0.000346922	0.00120551
hsa-mir-760	2.05903	1.07214	93.2034	4.71879e-22	6.94265e-21
hsa-mir-7641-1	2.06176	-0.209022	13.0164	0.000308771	0.00109215
hsa-mir-7641-2	1.67956	-0.307129	9.29456	0.00229836	0.00688367
hsa-mir-7702	1.82773	0.99167	35.0408	3.22869e-09	2.00237e-08
hsa-mir-7705	1.26179	0.000324973	27.753	1.37833e-07	7.56443e-07
hsa-mir-7706	1.02369	0.840448	54.4706	1.5779e-13	1.35543e-12
hsa-mir-7845	1.07255	-0.384931	15.5147	8.18662e-05	0.000320739
hsa-mir-7978	1.69534	0.235544	47.1073	6.72041e-12	5.19236e-11
hsa-mir-802	1.96665	0.728856	11.078	0.000873584	0.00283607
hsa-mir-873	-1.09558	-0.289114	12.0122	0.000528548	0.00176993
hsa-mir-875	4.36827	0.902348	47.4104	5.75772e-12	4.52439e-11
hsa-mir-885	4.01654	4.17457	180.033	4.76743e-41	1.43334e-39
hsa-mir-891a	3.40828	9.11041	21.2374	4.05774e-06	1.8521e-05
hsa-mir-891b	2.96303	2.16657	6.79354	0.00914882	0.0238283
hsa-mir-892a	2.7112	2.72835	5.59057	0.0180575	0.0432816
hsa-mir-93	1.29003	11.3881	186.698	1.67192e-42	5.37737e-41
hsa-mir-934	-5.5504	0.356502	573.848	8.1707e-127	1.88335e-124
hsa-mir-935	1.47146	1.08593	35.7243	2.2731e-09	1.42249e-08
hsa-mir-937	1.41871	0.417694	46.5117	9.10714e-12	6.92043e-11

[truncated: 10 more sheets: KIRP, LIHC, LUAD, LUSC, PCPG, PRAD, READ, STAD, THCA, UCEC]
