# Supplementary material for: CmirC update 2024: a multi-omics database for clustered miRNAs
Source: Funct Integr Genomics. 2024 Aug 1;24(4):133. doi: 10.1007/s10142-024-01410-2 (PMC11291601; doi:10.1007/s10142-024-01410-2)
Supplement: Supplementary file 3 — Supplementary Material 3 [file 10142_2024_1410_MOESM3_ESM.xlsx]

## Sheet: Sheet1
CmirC update 2024: A multi-omics database for clustered miRNAs
Akshay Pramod Ware1,2, Kapaettu Satyamoorthy3, and Bobby Paul1*
1Department of Bioinformatics, Manipal School of Life Sciences, Manipal Academy of Higher Education, Manipal – 576104, Karnataka, India.
2Institute of Cardiovascular Regeneration, Johann Wolfgang Goethe University, Theodor-Stern-Kai 7, Frankfurt Am Main – 60590, Germany.
3SDM College of Medical Sciences and Hospital, Shri Dharmasthala Manjunatheshwara (SDM) University, Manjushree Nagar, Sattur, Dharwad, Karnataka, 580009, India.
*Correspondence to: bobby.paul@manipal.edu
Supplementary File 2
The “NA” indicates that a specific cluster member is not significantly differentially expressed (Log2FC > 1.5 and adjusted p-value < 0.05) in a particular cancer type

## Sheet: BLCA
ID	Accession	Chromosome	Start	End	Strand	Sequence	Log2FC	logCPM	LR	PValue	FDR
hsa-mir-512-1	MI0003140	Chr19	53666679	53666762	+	UCUCAGUCUGUGGCACUCAGCCUUGAGGGCACUUUCUGGUGCCAGAAUGAAAGUGCUGUCAUAGCUGAGGUCCAAUGACUGAGG	8.52986	5.39637	26.1408	3.17e-07	2.35e-06
hsa-mir-512-2	MI0003141	Chr19	53669157	53669254	+	GGUACUUCUCAGUCUGUGGCACUCAGCCUUGAGGGCACUUUCUGGUGCCAGAAUGAAAGUGCUGUCAUAGCUGAGGUCCAAUGACUGAGGCGAGCACC	9.47575	5.40305	31.3057	2.2e-08	2.18e-07
hsa-mir-520d	MI0003164	Chr19	53720096	53720182	+	UCUCAAGCUGUGAGUCUACAAAGGGAAGCCCUUUCUGUUGUCUAAAAGAAAAGAAAGUGCUUCUCUUUGGUGGGUUACGGUUUGAGA	8.74982	4.00199	18.2532	1.93e-05	8.22e-05
hsa-mir-516b-2	MI0003167	Chr19	53725442	53725526	+	UCUCAUGAUGUGACCAUCUGGAGGUAAGAAGCACUUUGUGUUUUGUGAAAGAAAGUGCUUCCUUUCAGAGGGUUACUCUUUGAGA	6.76014	2.26354	13.9129	0.000191478	0.000630935
hsa-mir-526a-2	MI0003168	Chr19	53726922	53726986	+	GUGACCCUCUAGAGGGAAGCACUUUCUGUUGAAAGAAAAGAACAUGCAUCCUUUCAGAGGGUUAC	#N/A	#N/A	#N/A	#N/A	#N/A
hsa-mir-518a-1	MI0003170	Chr19	53731006	53731090	+	UCUCAAGCUGUGACUGCAAAGGGAAGCCCUUUCUGUUGUCUGAAAGAAGAGAAAGCGCUUCCCUUUGCUGGAUUACGGUUUGAGA	8.27759	4.24615	17.6627	2.64e-05	0.00010633
hsa-mir-518d	MI0003171	Chr19	53734877	53734963	+	UCCCAUGCUGUGACCCUCUAGAGGGAAGCACUUUCUGUUGUCUGAAAGAAACCAAAGCGCUUCCCUUUGGAGCGUUACGGUUUGAGA	#N/A	#N/A	#N/A	#N/A	#N/A
hsa-mir-516b-1	MI0003172	Chr19	53736845	53736934	+	UCUCAGGCUGUGACCAUCUGGAGGUAAGAAGCACUUUCUGUUUUGUGAAAGAAAAGAAAGUGCUUCCUUUCAGAGGGUUACUCUUUGAGA	8.16958	4.0134	15.9683	6.44e-05	0.000236623
hsa-mir-518a-2	MI0003173	Chr19	53739333	53739419	+	UCUCAAGCUGUGGGUCUGCAAAGGGAAGCCCUUUCUGUUGUCUAAAAGAAGAGAAAGCGCUUCCCUUUGCUGGAUUACGGUUUGAGA	9.20927	4.43152	22.881	1.72e-06	9.55e-06
hsa-mir-521-1	MI0003176	Chr19	53748636	53748722	+	UCUCAGGCUGUGACCCUCCAAAGGGAAGAACUUUCUGUUGUCUAAAAGAAAAGAACGCACUUCCCUUUAGAGUGUUACCGUGUGAGA	7.83559	3.00618	17.2565	3.27e-05	0.00012764
hsa-mir-517a	MI0003161	Chr19	53712268	53712354	+	UCUCAGGCAGUGACCCUCUAGAUGGAAGCACUGUCUGUUGUAUAAAAGAAAAGAUCGUGCAUCCCUUUAGAGUGUUACUGUUUGAGA	8.29302	5.4904	20.9382	4.74e-06	2.33e-05
hsa-mir-517b	MI0003165	Chr19	53721076	53721142	+	GUGACCCUCUAGAUGGAAGCACUGUCUGUUGUCUAAGAAAAGAUCGUGCAUCCCUUUAGAGUGUUAC	8.2797	5.47718	20.8393	4.99e-06	2.42e-05
hsa-mir-526b	MI0003150	Chr19	53694393	53694475	+	UCAGGCUGUGACCCUCUUGAGGGAAGCACUUUCUGUUGUCUGAAAGAAGAGAAAGUGCUUCCUUUUAGAGGCUUACUGUCUGA	9.01451	6.41563	28.713	8.39e-08	7.34e-07
hsa-mir-517c	MI0003174	Chr19	53741313	53741407	+	GAAGAUCUCAGGCAGUGACCCUCUAGAUGGAAGCACUGUCUGUUGUCUAAGAAAAGAUCGUGCAUCCUUUUAGAGUGUUACUGUUUGAGAAAAUC	8.36452	3.28769	17.6495	2.66e-05	0.00010672
hsa-mir-524	MI0003160	Chr19	53711002	53711088	+	UCUCAUGCUGUGACCCUACAAAGGGAAGCACUUUCUCUUGUCCAAAGGAAAAGAAGGCGCUUCCCUUUGGAGUGUUACGGUUUGAGA	7.87778	2.52289	17.9102	2.32e-05	9.53e-05
hsa-mir-518e	MI0003169	Chr19	53729838	53729925	+	UCUCAGGCUGUGACCCUCUAGAGGGAAGCGCUUUCUGUUGGCUAAAAGAAAAGAAAGCGCUUCCCUUCAGAGUGUUAACGCUUUGAGA	8.39665	5.10729	20.9095	4.82e-06	2.34e-05
hsa-mir-519d	MI0003162	Chr19	53713347	53713434	+	UCCCAUGCUGUGACCCUCCAAAGGGAAGCGCUUUCUGUUUGUUUUCUCUUAAACAAAGUGCCUCCCUUUAGAGUGUUACCGUUUGGGA	8.18588	4.18864	17.7678	2.5e-05	0.000102075
hsa-mir-523	MI0003153	Chr19	53698385	53698471	+	UCUCAUGCUGUGACCCUCUAGAGGGAAGCGCUUUCUGUUGUCUGAAAGAAAAGAACGCGCUUCCCUAUAGAGGGUUACCCUUUGAGA	7.7706	2.77078	13.3142	0.000263402	0.000846134
hsa-mir-520f	MI0003146	Chr19	53682159	53682245	+	UCUCAGGCUGUGACCCUCUAAAGGGAAGCGCUUUCUGUGGUCAGAAAGAAAAGCAAGUGCUUCCUUUUAGAGGGUUACCGUUUGGGA	9.27383	5.02326	23.5321	1.23e-06	7.26e-06
hsa-mir-520a	MI0003149	Chr19	53690881	53690965	+	CUCAGGCUGUGACCCUCCAGAGGGAAGUACUUUCUGUUGUCUGAGAGAAAAGAAAGUGCUUCCCUUUGGACUGUUUCGGUUUGAG	9.62931	6.22027	28.4612	9.56e-08	8.21e-07
hsa-mir-518c	MI0003159	Chr19	53708735	53708835	+	GCGAGAAGAUCUCAUGCUGUGACUCUCUGGAGGGAAGCACUUUCUGUUGUCUGAAAGAAAACAAAGCGCUUCUCUUUAGAGUGUUACGGUUUGAGAAAAGC	9.09534	5.32378	25.4625	4.51e-07	3.05e-06
hsa-mir-520c	MI0003158	Chr19	53707453	53707539	+	UCUCAGGCUGUCGUCCUCUAGAGGGAAGCACUUUCUGUUGUCUGAAAGAAAAGAAAGUGCUUCCUUUUAGAGGGUUACCGUUUGAGA	9.04773	3.93147	20.3442	6.47e-06	3.04e-05
hsa-mir-518f	MI0003154	Chr19	53700015	53700101	+	UCUCAUGCUGUGACCCUCUAGAGGGAAGCACUUUCUCUUGUCUAAAAGAAAAGAAAGCGCUUCUCUUUAGAGGAUUACUCUUUGAGA	10.0387	5.19123	25.6961	4e-07	2.88e-06
hsa-mir-518b	MI0003156	Chr19	53702737	53702819	+	UCAUGCUGUGGCCCUCCAGAGGGAAGCGCUUUCUGUUGUCUGAAAGAAAACAAAGCGCUCCCCUUUAGAGGUUUACGGUUUGA	9.05132	5.71366	25.4955	4.43e-07	3.05e-06
hsa-mir-515-1	MI0003144	Chr19	53679003	53679085	+	UCUCAUGCAGUCAUUCUCCAAAAGAAAGCACUUUCUGUUGUCUGAAAGCAGAGUGCCUUCUUUUGGAGCGUUACUGUUUGAGA	8.03356	3.37173	16.3481	5.27e-05	0.000198291
hsa-mir-515-2	MI0003147	Chr19	53685009	53685091	+	UCUCAUGCAGUCAUUCUCCAAAAGAAAGCACUUUCUGUUGUCUGAAAGCAGAGUGCCUUCUUUUGGAGCGUUACUGUUUGAGA	7.4954	3.3654	16.4622	4.96e-05	0.000187709
hsa-mir-1323	MI0003786	Chr19	53671968	53672040	+	ACUGAGGUCCUCAAAACUGAGGGGCAUUUUCUGUGGUUUGAAAGGAAAGUGCACCCAGUUUUGGGGAUGUCAA	8.94767	3.85539	22.248	2.4e-06	1.27e-05
hsa-mir-525	MI0003152	Chr19	53697533	53697617	+	CUCAAGCUGUGACUCUCCAGAGGGAUGCACUUUCUCUUAUGUGAAAAAAAAGAAGGCGCUUCCCUUUAGAGCGUUACGGUUUGGG	8.96509	5.41391	23.26	1.42e-06	8.06e-06
hsa-mir-519b	MI0003151	Chr19	53695213	53695293	+	CAUGCUGUGACCCUCUAGAGGGAAGCGCUUUCUGUUGUCUGAAAGAAAAGAAAGUGCAUCCUUUUAGAGGUUUACUGUUUG	7.92036	2.56089	16.962	3.81e-05	0.000146604
hsa-mir-522	MI0003177	Chr19	53751211	53751297	+	UCUCAGGCUGUGUCCCUCUAGAGGGAAGCGCUUUCUGUUGUCUGAAAGAAAAGAAAAUGGUUCCCUUUAGAGUGUUACGCUUUGAGA	8.56147	5.03769	28.7112	8.4e-08	7.34e-07
hsa-mir-519a-2	MI0003182	Chr19	53762344	53762430	+	UCUCAGGCUGUGUCCCUCUACAGGGAAGCGCUUUCUGUUGUCUGAAAGAAAGGAAAGUGCAUCCUUUUAGAGUGUUACUGUUUGAGA	8.86761	5.67716	31.8002	1.71e-08	1.73e-07
hsa-mir-520b	MI0003155	Chr19	53701227	53701287	+	CCCUCUACAGGGAAGCGCUUUCUGUUGUCUGAAAGAAAAGAAAGUGCUUCCUUUUAGAGGG	9.3176	5.07759	28.7334	8.31e-08	7.34e-07
hsa-mir-519e	MI0003145	Chr19	53679940	53680023	+	UCUCAUGCAGUCAUUCUCCAAAAGGGAGCACUUUCUGUUUGAAAGAAAACAAAGUGCCUCCUUUUAGAGUGUUACUGUUUGAGA	6.84659	1.5776	13.2549	0.00027187	0.000869368
hsa-mir-519a-1	MI0003178	Chr19	53752397	53752481	+	CUCAGGCUGUGACACUCUAGAGGGAAGCGCUUUCUGUUGUCUGAAAGAAAGGAAAGUGCAUCCUUUUAGAGUGUUACUGUUUGAG	10.3054	6.15715	41.1049	1.44e-10	2.55e-09
hsa-mir-521-2	MI0003163	Chr19	53716594	53716680	+	UCUCGGGCUGUGACUCUCCAAAGGGAAGAAUUUUCUCUUGUCUAAAAGAAAAGAACGCACUUCCCUUUAGAGUGUUACCGUGUGAGA	5.80145	0.945144	15.7552	7.21e-05	0.000262768
hsa-mir-519c	MI0003148	Chr19	53686469	53686555	+	UCUCAGCCUGUGACCCUCUAGAGGGAAGCGCUUUCUGUUGUCUGAAAGAAAAGAAAGUGCAUCUUUUUAGAGGAUUACAGUUUGAGA	8.56664	3.17915	21.1546	4.24e-06	2.08e-05
hsa-mir-520g	MI0003166	Chr19	53722166	53722255	+	UCCCAUGCUGUGACCCUCUAGAGGAAGCACUUUCUGUUUGUUGUCUGAGAAAAAACAAAGUGCUUCCCUUUAGAGUGUUACCGUUUGGGA	8.85883	4.21416	21.2133	4.11e-06	2.03e-05
hsa-mir-520h	MI0003175	Chr19	53742512	53742599	+	UCCCAUGCUGUGACCCUCUAGAGGAAGCACUUUCUGUUUGUUGUCUGAGAAAAAACAAAGUGCUUCCCUUUAGAGUUACUGUUUGGGA	8.12388	3.28563	17.6829	2.61e-05	0.000105509
hsa-mir-526a-1	MI0003157	Chr19	53706252	53706336	+	CUCAGGCUGUGACCCUCUAGAGGGAAGCACUUUCUGUUGCUUGAAAGAAGAGAAAGCGCUUCCUUUUAGAGGAUUACUCUUUGAG	3.51331	-0.697413	5.49964	0.0190204	0.0377991
hsa-mir-527	MI0003179	Chr19	53754018	53754102	+	UCUCAAGCUGUGACUGCAAAGGGAAGCCCUUUCUGUUGUCUAAAAGAAAAGAAAGUGCUUCCCUUUGGUGAAUUACGGUUUGAGA	8.19275	4.23328	19.9757	7.84e-06	3.61e-05
hsa-mir-516a-1	MI0003180	Chr19	53756741	53756830	+	UCUCAGGCUGUGACCUUCUCGAGGAAAGAAGCACUUUCUGUUGUCUGAAAGAAAAGAAAGUGCUUCCUUUCAGAGGGUUACGGUUUGAGA	8.21656	5.70319	30.9036	2.71e-08	2.65e-07
hsa-mir-516a-2	MI0003181	Chr19	53761133	53761222	+	UCUCAGGUUGUGACCUUCUCGAGGAAAGAAGCACUUUCUGUUGUCUGAAAGAAAAGAAAGUGCUUCCUUUCAGAGGGUUACGGUUUGAGA	9.64846	5.52197	39.3836	3.48e-10	5.5e-09
hsa-mir-520e	MI0003143	Chr19	53675711	53675797	+	UCUCCUGCUGUGACCCUCAAGAUGGAAGCAGUUUCUGUUGUCUGAAAGGAAAGAAAGUGCUUCCUUUUUGAGGGUUACUGUUUGAGA	7.30278	2.42045	14.5086	0.000139519	0.000474161
hsa-mir-498	MI0003142	Chr19	53674197	53674320	+	AACCCUCCUUGGGAAGUGAAGCUCAGGCUGUGAUUUCAAGCCAGGGGGCGUUUUUCUAUAACUGGAUGAAAAGCACCUCCAGAGCUUGAAGCUCACAGUUUGAGAGCAAUCGUCUAAGGAAGUU	7.43278	2.67858	15.4462	8.49e-05	0.000304681
hsa-mir-1283-2	MI0006430	Chr19	53758232	53758318	+	CUCAAGCUGUGAGUCUACAAAGGAAAGCGCUUUCUGUUGUCUGAAAGAAAAGAAAUCGCUUCCCUUUGGAGUGUUACGGUUUGAGAA	7.44716	2.12398	26.2148	3.05e-07	2.27e-06
hsa-mir-1283-1	MI0003832	Chr19	53688481	53688567	+	CUCAAGCUAUGAGUCUACAAAGGAAAGCGCUUUCUGUUGUCAGAAAGAAGAGAAAGCGCUUCCCUUUUGAGGGUUACGGUUUGAGAA	6.48331	1.50497	18.1067	2.09e-05	8.69e-05
hsa-mir-379	MI0000787	Chr14	101022066	101022132	+	AGAGAUGGUAGACUAUGGAACGUAGGCGUUAUGAUUUCUGACCUAUGUAACAUGGUCCACUAACUCU	#N/A	#N/A	#N/A	#N/A	#N/A
hsa-mir-411	MI0003675	Chr14	101023325	101023420	+	UGGUACUUGGAGAGAUAGUAGACCGUAUAGCGUACGCUUUAUCUGUGACGUAUGUAACACGGUCCACUAACCCUCAGUAUCAAAUCCAUCCCCGAG	#N/A	#N/A	#N/A	#N/A	#N/A
hsa-mir-299	MI0000744	Chr14	101023794	101023856	+	AAGAAAUGGUUUACCGUCCCACAUACAUUUUGAAUAUGUAUGUGGGAUGGUAAACCGCUUCUU	#N/A	#N/A	#N/A	#N/A	#N/A
hsa-mir-380	MI0000788	Chr14	101025017	101025077	+	AAGAUGGUUGACCAUAGAACAUGCGCUAUCUCUGUGUCGUAUGUAAUAUGGUCCACAUCUU	#N/A	#N/A	#N/A	#N/A	#N/A
hsa-mir-1197	MI0006656	Chr14	101025564	101025651	+	ACUUCCUGGUAUUUGAAGAUGCGGUUGACCAUGGUGUGUACGCUUUAUUUGUGACGUAGGACACAUGGUCUACUUCUUCUCAAUAUCA	#N/A	#N/A	#N/A	#N/A	#N/A
hsa-mir-323a	MI0000807	Chr14	101025732	101025817	+	UUGGUACUUGGAGAGAGGUGGUCCGUGGCGCGUUCGCUUUAUUUAUGGCGCACAUUACACGGUCGACCUCUUUGCAGUAUCUAAUC	2.0677	3.26046	11.6936	0.000627147	0.00189355
hsa-mir-758	MI0003757	Chr14	101026020	101026107	+	GCCUGGAUACAUGAGAUGGUUGACCAGAGAGCACACGCUUUAUUUGUGCCGUUUGUGACCUGGUCCACUAACCCUCAGUAUCUAAUGC	#N/A	#N/A	#N/A	#N/A	#N/A
hsa-mir-329-1	MI0001725	Chr14	101026785	101026864	+	GGUACCUGAAGAGAGGUUUUCUGGGUUUCUGUUUCUUUAAUGAGGACGAAACACACCUGGUUAACCUCUUUUCCAGUAUC	#N/A	#N/A	#N/A	#N/A	#N/A
hsa-mir-329-2	MI0001726	Chr14	101027100	101027183	+	GUGGUACCUGAAGAGAGGUUUUCUGGGUUUCUGUUUCUUUAUUGAGGACGAAACACACCUGGUUAACCUCUUUUCCAGUAUCAA	#N/A	#N/A	#N/A	#N/A	#N/A
hsa-mir-494	MI0003134	Chr14	101029634	101029714	+	GAUACUCGAAGGAGAGGUUGUCCGUGUUGUCUUCUCUUUAUUUAUGAUGAAACAUACACGGGAAACCUCUUUUUUAGUAUC	#N/A	#N/A	#N/A	#N/A	#N/A
hsa-mir-1193	MI0014205	Chr14	101030052	101030129	+	GUAGCUGAGGGGAUGGUAGACCGGUGACGUGCACUUCAUUUACGAUGUAGGUCACCCGUUUGACUAUCCACCAGCGCC	#N/A	#N/A	#N/A	#N/A	#N/A
hsa-mir-543	MI0005565	Chr14	101031987	101032064	+	UACUUAAUGAGAAGUUGCCCGUGUUUUUUUCGCUUUAUUUGUGACGAAACAUUCGCGGUGCACUUCUUUUUCAGUAUC	#N/A	#N/A	#N/A	#N/A	#N/A
hsa-mir-495	MI0003135	Chr14	101033755	101033836	+	UGGUACCUGAAAAGAAGUUGCCCAUGUUAUUUUCGCUUUAUAUGUGACGAAACAAACAUGGUGCACUUCUUUUUCGGUAUCA	#N/A	#N/A	#N/A	#N/A	#N/A
hsa-mir-376c	MI0000776	Chr14	101039690	101039755	+	AAAAGGUGGAUAUUCCUUCUAUGUUUAUGUUAUUUAUGGUUAAACAUAGAGGAAAUUCCACGUUUU	#N/A	#N/A	#N/A	#N/A	#N/A
hsa-mir-376a-2	MI0003529	Chr14	101040069	101040148	+	GGUAUUUAAAAGGUAGAUUUUCCUUCUAUGGUUACGUGUUUGAUGGUUAAUCAUAGAGGAAAAUCCACGUUUUCAGUAUC	#N/A	#N/A	#N/A	#N/A	#N/A
hsa-mir-654	MI0003676	Chr14	101040219	101040299	+	GGGUAAGUGGAAAGAUGGUGGGCCGCAGAACAUGUGCUGAGUUCGUGCCAUAUGUCUGCUGACCAUCACCUUUAGAAGCCC	#N/A	#N/A	#N/A	#N/A	#N/A
hsa-mir-376b	MI0002466	Chr14	101040436	101040535	+	CAGUCCUUCUUUGGUAUUUAAAACGUGGAUAUUCCUUCUAUGUUUACGUGAUUCCUGGUUAAUCAUAGAGGAAAAUCCAUGUUUUCAGUAUCAAAUGCUG	#N/A	#N/A	#N/A	#N/A	#N/A
hsa-mir-376a-1	MI0000784	Chr14	101040782	101040849	+	UAAAAGGUAGAUUCUCCUUCUAUGAGUACAUUAUUUAUGAUUAAUCAUAGAGGAAAAUCCACGUUUUC	#N/A	#N/A	#N/A	#N/A	#N/A
hsa-mir-300	MI0005525	Chr14	101041363	101041445	+	UGCUACUUGAAGAGAGGUAAUCCUUCACGCAUUUGCUUUACUUGCAAUGAUUAUACAAGGGCAGACUCUCUCUGGGGAGCAAA	#N/A	#N/A	#N/A	#N/A	#N/A
hsa-mir-1185-1	MI0003844	Chr14	101042977	101043062	+	UUUGGUACUUGAAGAGAGGAUACCCUUUGUAUGUUCACUUGAUUAAUGGCGAAUAUACAGGGGGAGACUCUUAUUUGCGUAUCAAA	#N/A	#N/A	#N/A	#N/A	#N/A
hsa-mir-1185-2	MI0003821	Chr14	101044198	101044283	+	UUUGGUACUUAAAGAGAGGAUACCCUUUGUAUGUUCACUUGAUUAAUGGCGAAUAUACAGGGGGAGACUCUCAUUUGCGUAUCAAA	#N/A	#N/A	#N/A	#N/A	#N/A
hsa-mir-381	MI0000789	Chr14	101045920	101045994	+	UACUUAAAGCGAGGUUGCCCUUUGUAUAUUCGGUUUAUUGACAUGGAAUAUACAAGGGCAAGCUCUCUGUGAGUA	#N/A	#N/A	#N/A	#N/A	#N/A
hsa-mir-487b	MI0003530	Chr14	101046455	101046538	+	UUGGUACUUGGAGAGUGGUUAUCCCUGUCCUGUUCGUUUUGCUCAUGUCGAAUCGUACAGGGUCAUCCACUUUUUCAGUAUCAA	#N/A	#N/A	#N/A	#N/A	#N/A
hsa-mir-539	MI0003514	Chr14	101047321	101047398	+	AUACUUGAGGAGAAAUUAUCCUUGGUGUGUUCGCUUUAUUUAUGAUGAAUCAUACAAGGACAAUUUCUUUUUGAGUAU	#N/A	#N/A	#N/A	#N/A	#N/A
hsa-mir-889	MI0005540	Chr14	101047901	101047979	+	GUGCUUAAAGAAUGGCUGUCCGUAGUAUGGUCUCUAUAUUUAUGAUGAUUAAUAUCGGACAACCAUUGUUUUAGUAUCC	#N/A	#N/A	#N/A	#N/A	#N/A
hsa-mir-544a	MI0003515	Chr14	101048658	101048748	+	AUUUUCAUCACCUAGGGAUCUUGUUAAAAAGCAGAUUCUGAUUCAGGGACCAAGAUUCUGCAUUUUUAGCAAGUUCUCAAGUGAUGCUAAU	#N/A	#N/A	#N/A	#N/A	#N/A
hsa-mir-655	MI0003677	Chr14	101049550	101049646	+	AACUAUGCAAGGAUAUUUGAGGAGAGGUUAUCCGUGUUAUGUUCGCUUCAUUCAUCAUGAAUAAUACAUGGUUAACCUCUUUUUGAAUAUCAGACUC	#N/A	#N/A	#N/A	#N/A	#N/A
hsa-mir-487a	MI0002471	Chr14	101052446	101052525	+	GGUACUUGAAGAGUGGUUAUCCCUGCUGUGUUCGCUUAAUUUAUGACGAAUCAUACAGGGACAUCCAGUUUUUCAGUAUC	#N/A	#N/A	#N/A	#N/A	#N/A
hsa-mir-382	MI0000790	Chr14	101054306	101054381	+	UACUUGAAGAGAAGUUGUUCGUGGUGGAUUCGCUUUACUUAUGACGAAUCAUUCACGGACAACACUUUUUUCAGUA	#N/A	#N/A	#N/A	#N/A	#N/A
hsa-mir-134	MI0000474	Chr14	101054687	101054759	+	CAGGGUGUGUGACUGGUUGACCAGAGGGGCAUGCACUGUGUUCACCCUGUGGGCCACCUAGUCACCAACCCUC	#N/A	#N/A	#N/A	#N/A	#N/A
hsa-mir-668	MI0003761	Chr14	101055258	101055323	+	GGUAAGUGCGCCUCGGGUGAGCAUGCACUUAAUGUGGGUGUAUGUCACUCGGCUCGGCCCACUACC	#N/A	#N/A	#N/A	#N/A	#N/A
hsa-mir-485	MI0002469	Chr14	101055419	101055491	+	ACUUGGAGAGAGGCUGGCCGUGAUGAAUUCGAUUCAUCAAAGCGAGUCAUACACGGCUCUCCUCUCUUUUAGU	#N/A	#N/A	#N/A	#N/A	#N/A
hsa-mir-323b	MI0014206	Chr14	101056219	101056300	+	UGGUACUCGGAGGGAGGUUGUCCGUGGUGAGUUCGCAUUAUUUAAUGAUGCCCAAUACACGGUCGACCUCUUUUCGGUAUCA	2.8281	2.26553	25.4804	4.47e-07	3.05e-06
hsa-mir-154	MI0000480	Chr14	101059755	101059838	+	GUGGUACUUGAAGAUAGGUUAUCCGUGUUGCCUUCGCUUUAUUUGUGACGAAUCAUACACGGUUGACCUAUUUUUCAGUACCAA	#N/A	#N/A	#N/A	#N/A	#N/A
hsa-mir-496	MI0003136	Chr14	101060573	101060674	+	CCCAAGUCAGGUACUCGAAUGGAGGUUGUCCAUGGUGUGUUCAUUUUAUUUAUGAUGAGUAUUACAUGGCCAAUCUCCUUUCGGUACUCAAUUCUUCUUGGG	#N/A	#N/A	#N/A	#N/A	#N/A
hsa-mir-377	MI0000785	Chr14	101062050	101062118	+	UUGAGCAGAGGUUGCCCUUGGUGAAUUCGCUUUAUUUAUGUUGAAUCACACAAAGGCAACUUUUGUUUG	#N/A	#N/A	#N/A	#N/A	#N/A
hsa-mir-541	MI0005539	Chr14	101064495	101064578	+	ACGUCAGGGAAAGGAUUCUGCUGUCGGUCCCACUCCAAAGUUCACAGAAUGGGUGGUGGGCACAGAAUCUGGACUCUGCUUGUG	#N/A	#N/A	#N/A	#N/A	#N/A
hsa-mir-409	MI0001735	Chr14	101065300	101065378	+	UGGUACUCGGGGAGAGGUUACCCGAGCAACUUUGCAUCUGGACGACGAAUGUUGCUCGGUGAACCCCUUUUCGGUAUCA	#N/A	#N/A	#N/A	#N/A	#N/A
hsa-mir-412	MI0002464	Chr14	101065447	101065537	+	CUGGGGUACGGGGAUGGAUGGUCGACCAGUUGGAAAGUAAUUGUUUCUAAUGUACUUCACCUGGUCCACUAGCCGUCCGUAUCCGCUGCAG	#N/A	#N/A	#N/A	#N/A	#N/A
hsa-mir-369	MI0000777	Chr14	101065598	101065667	+	UUGAAGGGAGAUCGACCGUGUUAUAUUCGCUUUAUUGACUUCGAAUAAUACAUGGUUGAUCUUUUCUCAG	#N/A	#N/A	#N/A	#N/A	#N/A
hsa-mir-410	MI0002465	Chr14	101065912	101065991	+	GGUACCUGAGAAGAGGUUGUCUGUGAUGAGUUCGCUUUUAUUAAUGACGAAUAUAACACAGAUGGCCUGUUUUCAGUACC	#N/A	#N/A	#N/A	#N/A	#N/A
hsa-mir-656	MI0003678	Chr14	101066724	101066801	+	CUGAAAUAGGUUGCCUGUGAGGUGUUCACUUUCUAUAUGAUGAAUAUUAUACAGUCAACCUCUUUCCGAUAUCGAAUC	#N/A	#N/A	#N/A	#N/A	#N/A
hsa-mir-493	MI0003132	Chr14	100869060	100869148	+	CUGGCCUCCAGGGCUUUGUACAUGGUAGGCUUUCAUUCAUUCGUUUGCACAUUCGGUGAAGGUCUACUGUGUGCCAGGCCCUGUGCCAG	#N/A	#N/A	#N/A	#N/A	#N/A
hsa-mir-337	MI0000806	Chr14	100874493	100874585	+	GUAGUCAGUAGUUGGGGGGUGGGAACGGCUUCAUACAGGAGUUGAUGCACAGUUAUCCAGCUCCUAUAUGAUGCCUUUCUUCAUCCCCUUCAA	#N/A	#N/A	#N/A	#N/A	#N/A
hsa-mir-665	MI0005563	Chr14	100875033	100875104	+	UCUCCUCGAGGGGUCUCUGCCUCUACCCAGGACUCUUUCAUGACCAGGAGGCUGAGGCCCCUCACAGGCGGC	#N/A	#N/A	#N/A	#N/A	#N/A
hsa-mir-431	MI0001721	Chr14	100881007	100881120	+	UCCUGCUUGUCCUGCGAGGUGUCUUGCAGGCCGUCAUGCAGGCCACACUGACGGUAACGUUGCAGGUCGUCUUGCAGGGCUUCUCGCAAGACGACAUCCUCAUCACCAACGACG	#N/A	#N/A	#N/A	#N/A	#N/A
hsa-mir-433	MI0001723	Chr14	100881886	100881978	+	CCGGGGAGAAGUACGGUGAGCCUGUCAUUAUUCAGAGAGGCUAGAUCCUCUGUGUUGAGAAGGAUCAUGAUGGGCUCCUCGGUGUUCUCCAGG	#N/A	#N/A	#N/A	#N/A	#N/A
hsa-mir-127	MI0000472	Chr14	100882979	100883075	+	UGUGAUCACUGUCUCCAGCCUGCUGAAGCUCAGAGGGCUCUGAUUCAGAAAGAUCAUCGGAUCCGUCUGAGCUUGGCUGGUCGGAAGUCUCAUCAUC	#N/A	#N/A	#N/A	#N/A	#N/A
hsa-mir-432	MI0003133	Chr14	100884483	100884576	+	UGACUCCUCCAGGUCUUGGAGUAGGUCAUUGGGUGGAUCCUCUAUUUCCUUACGUGGGCCACUGGAUGGCUCCUCCAUGUCUUGGAGUAGAUCA	#N/A	#N/A	#N/A	#N/A	#N/A
hsa-mir-136	MI0000475	Chr14	100884702	100884783	+	UGAGCCCUCGGAGGACUCCAUUUGUUUUGAUGAUGGAUUCUUAUGCUCCAUCAUCGUCUCAAAUGAGUCUUCAGAGGGUUCU	#N/A	#N/A	#N/A	#N/A	#N/A
hsa-mir-532	MI0003205	ChrX	50003148	50003238	+	CGACUUGCUUUCUCUCCUCCAUGCCUUGAGUGUAGGACCGUUGGCAUCUUAAUUACCCUCCCACACCCAAGGCUUGCAGAAGAGCGAGCCU	1.19201	9.7928	22.8912	1.71e-06	9.53e-06
hsa-mir-188	MI0000484	ChrX	50003503	50003588	+	UGCUCCCUCUCUCACAUCCCUUGCAUGGUGGAGGGUGAGCUUUCUGAAAACCCCUCCCACAUGCAGGGUUUGCAGGAUGGCGAGCC	2.74066	2.42081	51.333	7.8e-13	2.33e-11
hsa-mir-500a	MI0003184	ChrX	50008431	50008514	+	GCUCCCCCUCUCUAAUCCUUGCUACCUGGGUGAGAGUGCUGUCUGAAUGCAAUGCACCUGGGCAAGGAUUCUGAGAGCGAGAGC	1.09266	8.21359	16.2717	5.49e-05	0.00020535
hsa-mir-362	MI0000762	ChrX	50008964	50009028	+	CUUGAAUCCUUGGAACCUAGGUGUGAGUGCUAUUUCAGUGCAACACACCUAUUCAAGGAUUCAAA	1.16043	3.95614	16.0164	6.28e-05	0.00023129
hsa-mir-501	MI0003185	ChrX	50009722	50009805	+	GCUCUUCCUCUCUAAUCCUUUGUCCCUGGGUGAGAGUGCUUUCUGAAUGCAAUGCACCCGGGCAAGGAUUCUGAGAGGGUGAGC	1.57689	5.93592	25.6005	4.2e-07	2.94e-06
hsa-mir-500b	MI0015903	ChrX	50010672	50010750	+	CCCCCUCUCUAAUCCUUGCUACCUGGGUGAGAGUGCUUUCUGAAUGCAGUGCACCCAGGCAAGGAUUCUGCAAGGGGGA	1.37075	2.96533	22.9272	1.68e-06	9.43e-06
hsa-mir-660	MI0003684	ChrX	50013241	50013337	+	CUGCUCCUUCUCCCAUACCCAUUGCAUAUCGGAGUUGUGAAUUCUCAAAACACCUCCUGUGUGCAUGGAUUACAGGAGGGUGAGCCUUGUCAUCGUG	1.24001	5.94115	22.4931	2.11e-06	1.15e-05
hsa-mir-502	MI0003186	ChrX	50014598	50014683	+	UGCUCCCCCUCUCUAAUCCUUGCUAUCUGGGUGCUAGUGCUGGCUCAAUGCAAUGCACCUGGGCAAGGAUUCAGAGAGGGGGAGCU	1.09024	3.57147	21.4584	3.62e-06	1.82e-05
hsa-mir-3689f	MI0016837	Chr9	134850742	134850807	-	AGGUGUGAUAUCGUGCUUCCUGGGACGUGUGAUGCUGUGCUUCCUGGGAGGUGUGAUCCCACACUC	#N/A	#N/A	#N/A	#N/A	#N/A
hsa-mir-3689e	MI0016836	Chr9	134850570	134850641	-	GGGAGGUGUGAUAUCAUGGUUCCUGGGAGGUAUGAUAUCGUGGUUCCUGGGAGGUGUGAUCCCGUGCUCCCU	#N/A	#N/A	#N/A	#N/A	#N/A
hsa-mir-3689d-2	MI0016835	Chr9	134850277	134850356	-	ACUGGGAGGUGUGAUCUCACACUCGCUGGGAGGUGUGCUAUCGUCUUCCCUGGGAGGUGUGAUCCUGUUCUUCCUGAGCG	#N/A	#N/A	#N/A	#N/A	#N/A
hsa-mir-3689b	MI0016411	Chr9	134850125	134850272	-	GAUCCUGUGCUCCCUGGGGGGUCUGAUCCUGUGCUUCCUGGGAGGUGUGAUAUCAUGGUUCCUGGGAGGUGUGAUCCCGUGCUUCCUGGGAGGUGUGAUAUUGUGGUUCCUGGGAGGUGUGAUCCCGUGCUCCCUGGGAGGUGUGAUC	#N/A	#N/A	#N/A	#N/A	#N/A
hsa-mir-3689d-1	MI0016834	Chr9	134849609	134849682	-	UGGGAGGUGUGAUCUCACACUCGCUGGGAGGUGUGCUAUCGUCUUCCCCGGGAGGUGUGAUCCUGUUCUUCCUG	#N/A	#N/A	#N/A	#N/A	#N/A
hsa-mir-3689a	MI0016090	Chr9	134849487	134849564	-	CCUGGGAGGUGUGAUAUCAUGGUUCCUGGGAGGUGUGAUCCUGUGCUUCCUGGGAGGUGUGAUAUCGUGGUUCCUGGG	#N/A	#N/A	#N/A	#N/A	#N/A
hsa-mir-3689c	MI0016832	Chr9	134849298	134849369	-	GGGAGGUGUGAUAUCGUGGUUCCUGGGAGGUGUGAUAUCGUGGUUCCUGGGAGGUGUGAUAUUGUGGUUCCU	#N/A	#N/A	#N/A	#N/A	#N/A
hsa-mir-17	MI0000071	Chr13	91350605	91350688	+	GUCAGAAUAAUGUCAAAGUGCUUACAGUGCAGGUAGUGAUAUGUGCAUCUACUGCAGUGAAGGCACUUGUAGCAUUAUGGUGAC	2.41296	10.2766	72.957	1.33e-17	2.14e-15
hsa-mir-18a	MI0000072	Chr13	91350751	91350821	+	UGUUCUAAGGUGCAUCUAGUGCAGAUAGUGAAGUAGAUUAGCAUCUACUGCCCUAAGUGCUCCUUCUGGCA	3.49784	5.30145	72.6832	1.52e-17	2.14e-15
hsa-mir-19a	MI0000073	Chr13	91350891	91350972	+	GCAGUCCUCUGUUAGUUUUGCAUAGUUGCACUACAAGAAGAAUGUAGUUGUGCAAAUCUAUGCAAAACUGAUGGUGGCCUGC	2.80408	5.55572	66.8063	3e-16	2.11e-14
hsa-mir-20a	MI0000076	Chr13	91351065	91351135	+	GUAGCACUAAAGUGCUUAUAGUGCAGGUAGUGUUUAGUUAUCUACUGCAUUAUGAGCACUUAAAGUACUGC	2.6293	9.07144	64.2603	1.09e-15	6.39e-14
hsa-mir-19b-1	MI0000074	Chr13	91351192	91351278	+	CACUGUUCUAUGGUUAGUUUUGCAGGUUUGCAUCCAGCUGUGUGAUAUUCUGCUGUGCAAAUCCAUGCAAAACUGACUGUGGUAGUG	2.11005	6.88267	57.2088	3.92e-14	1.67e-12
hsa-mir-92a-1	MI0000093	Chr13	91351314	91351391	+	CUUUCUACACAGGUUGGGAUCGGUUGCAAUGCUGUGUUUCUGUAUGGUAUUGCACUUGUCCCGGCCUGUUGAGUUUGG	1.85011	12.9195	55.3149	1.03e-13	3.7e-12
hsa-mir-106a	MI0000113	ChrX	134170198	134170278	-	CCUUGGCCAUGUAAAAGUGCUUACAGUGCAGGUAGCUUUUUGAGAUCUACUGCAAUGUAAGCACUUCUUACAUUACCAUGG	2.65279	4.36791	37.6171	8.61e-10	1.2e-08
hsa-mir-18b	MI0001518	ChrX	134170041	134170111	-	UGUGUUAAGGUGCAUCUAGUGCAGUUAGUGAAGCAGCUUAGAAUCUACUGCCCUAAAUGCCCCUUCUGGCA	2.4697	0.698956	20.2078	6.95e-06	3.24e-05
hsa-mir-20b	MI0001519	ChrX	134169809	134169877	-	AGUACCAAAGUGCUCAUAGUGCAGGUAGUUUUGGCAUGACUCUACUGUAGUAUGGGCACUUCCAGUACU	2.87366	5.46887	25.473	4.49e-07	3.05e-06
hsa-mir-19b-2	MI0000075	ChrX	134169671	134169766	-	ACAUUGCUACUUACAAUUAGUUUUGCAGGUUUGCAUUUCAGCGUAUAUAUGUAUAUGUGGCUGUGCAAAUCCAUGCAAAACUGAUUGUGAUAAUGU	2.14348	6.74715	57.5604	3.28e-14	1.44e-12
hsa-mir-92a-2	MI0000094	ChrX	134169538	134169612	-	UCAUCCCUGGGUGGGGAUUUGUUGCAUUACUUGUGUUCUAUAUAAAGUAUUGCACUUGUCCCGGCCUGUGGAAGA	1.85232	12.8142	55.9534	7.42e-14	2.82e-12
hsa-mir-363	MI0000764	ChrX	134169378	134169452	-	UGUUGUCGGGUGGAUCACGAUGCAAUUUUGAUGAGUAUCAUAGGAGAAAAAUUGCACGGUAUCCAUCUGUAAACC	2.10472	4.43377	18.619	1.6e-05	6.97e-05
hsa-mir-424	MI0001446	ChrX	134546614	134546711	-	CGAGGGGAUACAGCAGCAAUUCAUGUUUUGAAGUGUUCUAAAUGGUUCAAAACGUGAGGCGCUGCUAUACCCCCUCGUGGGGAAGGUAGAAGGUGGGG	1.62044	6.96438	35.2684	2.87e-09	3.45e-08
hsa-mir-503	MI0003188	ChrX	134546328	134546398	-	UGCCCUAGCAGCGGGAACAGUUCUGCAGUGAGCGAUCGGUGCUCUGGGGUAUUGUUUCCGCUGCCAGGGUA	3.32103	3.70392	61.6821	4.04e-15	2.03e-13
hsa-mir-542	MI0003686	ChrX	134541341	134541437	-	CAGAUCUCAGACAUCUCGGGGAUCAUCAUGUCACGAGAUACCAGUGUGCACUUGUGACAGAUUGAUAACUGAAAGGUCUGGGAGCCACUCAUCUUCA	1.16261	8.26984	23.2912	1.39e-06	8e-06
hsa-mir-450a-2	MI0003187	ChrX	134540508	134540607	-	CCAAAGAAAGAUGCUAAACUAUUUUUGCGAUGUGUUCCUAAUAUGUAAUAUAAAUGUAUUGGGGACAUUUUGCAUUCAUAGUUUUGUAUCAAUAAUAUGG	2.05715	2.7354	41.958	9.33e-11	1.75e-09
hsa-mir-450a-1	MI0001652	ChrX	134540341	134540431	-	AAACGAUACUAAACUGUUUUUGCGAUGUGUUCCUAAUAUGCACUAUAAAUAUAUUGGGAACAUUUUGCAUGUAUAGUUUUGUAUCAAUAUA	2.20601	2.72882	48.5513	3.22e-12	8.61e-11
hsa-mir-450b	MI0005531	ChrX	134540185	134540262	-	GCAGAAUUAUUUUUGCAAUAUGUUCCUGAAUAUGUAAUAUAAGUGUAUUGGGAUCAUUUUGCAUCCAUAGUUUUGUAU	1.80261	4.07736	37.8487	7.64e-10	1.1e-08
hsa-mir-891b	MI0005534	ChrX	146001053	146001131	-	CCUUAAUCCUUGCAACUUACCUGAGUCAUUGAUUCAGUAAAACAUUCAAUGGCACAUGUUUGUUGUUAGGGUCAAAAGA	#N/A	#N/A	#N/A	#N/A	#N/A
hsa-mir-892b	MI0005538	ChrX	145997198	145997274	-	UGCAAUGCCCUACUCAGAAAGGUGCCAUUUAUGUAGAUUUUAUGUCACUGGCUCCUUUCUGGGUAGAGCAAGGCUCA	#N/A	#N/A	#N/A	#N/A	#N/A
hsa-mir-892a	MI0005528	ChrX	145996669	145996743	-	GCAGUGCCUUACUCAGAAAGGUGCCAGUCACUUACACUACAUGUCACUGUGUCCUUUCUGCGUAGAGUAAGGCUC	#N/A	#N/A	#N/A	#N/A	#N/A
hsa-mir-888	MI0005537	ChrX	145994784	145994860	-	GGCAGUGCUCUACUCAAAAAGCUGUCAGUCACUUAGAUUACAUGUGACUGACACCUCUUUGGGUGAAGGAAGGCUCA	#N/A	#N/A	#N/A	#N/A	#N/A
hsa-mir-890	MI0005533	ChrX	145994275	145994351	-	GGAAGUGCCCUACUUGGAAAGGCAUCAGUUGCUUAGAUUACAUGUAACUAUUCCCUUUCUGAGUAGAGUAAGUCUUA	#N/A	#N/A	#N/A	#N/A	#N/A
hsa-mir-892c	MI0022560	ChrX	145992750	145992826	-	GGCAGUGCCCUAUUCAGAAAGGUGCCAGUCACUUAGAUUACAUGUCACUGUUUCCUUUCUGAGUGGAGUAGGGCUUA	#N/A	#N/A	#N/A	#N/A	#N/A
hsa-mir-941-1	MI0005763	Chr20	63919449	63919520	+	UGUGGACAUGUGCCCAGGGCCCGGGACAGCGCCACGGAAGAGGACGCACCCGGCUGUGUGCACAUGUGCCCA	#N/A	#N/A	#N/A	#N/A	#N/A
hsa-mir-941-2	MI0005764	Chr20	63919505	63919576	+	UGUGCACAUGUGCCCAGGGCCCGGGACAGCGCCACGGAAGAGGACGCACCCGGCUGUGUGCACAUGUGCCCA	#N/A	#N/A	#N/A	#N/A	#N/A
hsa-mir-941-3	MI0005765	Chr20	63919561	63919632	+	UGUGCACAUGUGCCCAGGGCCCGGGACAGCGCCACGGAAGAGGACGCACCCGGCUGUGUGCACAUGUGCCCA	#N/A	#N/A	#N/A	#N/A	#N/A
hsa-mir-941-4	MI0005766	Chr20	63919756	63919827	+	UGUGCACAUGUGCCCAGGGCCCGGGACAGCGCCACGGAAGAGGACGCACCCGGCUGUGUGCACAUGUGCCCA	#N/A	#N/A	#N/A	#N/A	#N/A
hsa-mir-941-5	MI0031520	Chr20	63919868	63919939	+	UGUGCACAUGUGCCCAGGGCCCGGGACAGCGCCACGGAAGAGGACGCACCCGGCUGUGUGCACAUGUGCCCA	#N/A	#N/A	#N/A	#N/A	#N/A
hsa-mir-302b	MI0000772	Chr4	112648485	112648557	-	GCUCCCUUCAACUUUAACAUGGAAGUGCUUUCUGUGACUUUAAAAGUAAGUGCUUCCAUGUUUUAGUAGGAGU	#N/A	#N/A	#N/A	#N/A	#N/A
hsa-mir-302c	MI0000773	Chr4	112648363	112648430	-	CCUUUGCUUUAACAUGGGGGUACCUGCUGUGUGAAACAAAAGUAAGUGCUUCCAUGUUUCAGUGGAGG	#N/A	#N/A	#N/A	#N/A	#N/A
hsa-mir-302a	MI0000738	Chr4	112648183	112648251	-	CCACCACUUAAACGUGGAUGUACUUGCUUUGAAACUAAAGAAGUAAGUGCUUCCAUGUUUUGGUGAUGG	#N/A	#N/A	#N/A	#N/A	#N/A
hsa-mir-302d	MI0000774	Chr4	112648004	112648071	-	CCUCUACUUUAACAUGGAGGCACUUGCUGUGACAUGACAAAAAUAAGUGCUUCCAUGUUUGAGUGUGG	#N/A	#N/A	#N/A	#N/A	#N/A
hsa-mir-367	MI0000775	Chr4	112647874	112647941	-	CCAUUACUGUUGCUAAUAUGCAACUCUGUUGAAUAUAAAUUGGAAUUGCACUUUAGCAAUGGUGAUGG	#N/A	#N/A	#N/A	#N/A	#N/A
hsa-mir-6749	MI0022594	Chr11	64902387	64902455	-	GGCCCUCGGGCCUGGGGUUGGGGGAGCUCUGUCCUGUCUCACUCAUUGCUCCUCCCCUGCCUGGCCCAG	1.10674	-1.22896	5.54689	0.0185136	0.0370008
hsa-mir-6750	MI0022595	Chr11	64898363	64898437	-	GCUGUCAGGGAACAGCUGGGUGAGCUGCUGCCCCAGAGGCCCAGCAGGUGUCCAGAACUCACCCUCUGCUCCCAG	1.24516	-1.06876	5.70289	0.016937	0.0342882
hsa-mir-194-2	MI0000732	Chr11	64891355	64891439	-	UGGUUCCCGCCCCCUGUAACAGCAACUCCAUGUGGAAGUGCCCACUGGUUCCAGUGGGGCUGCUGUUAUCUGGGGCGAGGGCCAG	2.54955	7.54608	25.6458	4.1e-07	2.91e-06
hsa-mir-192	MI0000234	Chr11	64891137	64891246	-	GCCGAGACCGAGUGCACAGGGCUCUGACCUAUGAAUUGACAGCCAGUGCUCUCGUCUCCCCUCUGGCUGCCAAUUCCAUAGGUCACAGGUAUGUUCGCCUCAAUGCCAGC	3.24364	9.40285	39.9639	2.59e-10	4.23e-09
hsa-mir-4537	MI0016908	Chr14	105859484	105859553	-	UGAGCCGAGCUGAGCUUAGCUGGGCUGAGCUAACCAGGGCUGGGCUGAGCUGGGCUGAGCUGAGCUGAGC	#N/A	#N/A	#N/A	#N/A	#N/A
hsa-mir-4538	MI0016909	Chr14	105858165	105858242	-	GAGCUUGGAUGAGCUGGGCUGAACUGGGCUGGGUUGAGCUGGGCUGGGCUGAGUUGAGCCAGACUGAUCUGGGCUGAG	#N/A	#N/A	#N/A	#N/A	#N/A
hsa-mir-4507	MI0016871	Chr14	105858124	105858175	-	UCUGGGCUGAGCCGAGCUGGGUUAAGCCGAGCUGGGUUGGGCUGGGCUGGGU	#N/A	#N/A	#N/A	#N/A	#N/A
hsa-mir-4539	MI0016910	Chr14	105857513	105857572	-	UGAGCUGAGCUCUGCUGUGCUGUGCUGAGCAGGGCUGAGCUGAACUGGGCUGAGCUGGGC	#N/A	#N/A	#N/A	#N/A	#N/A
hsa-mir-4732	MI0017369	Chr17	28861655	28861730	-	GAGGGAGCUGUAGAGCAGGGAGCAGGAAGCUGUGUGUGUCCAGCCCUGACCUGUCCUGUUCUGCCCCCAGCCCCUC	#N/A	#N/A	#N/A	#N/A	#N/A
hsa-mir-144	MI0000460	Chr17	28861533	28861618	-	UGGGGCCCUGGCUGGGAUAUCAUCAUAUACUGUAAGUUUGCGAUGAGACACUACAGUAUAGAUGAUGUACUAGUCCGGGCACCCCC	#N/A	#N/A	#N/A	#N/A	#N/A
hsa-mir-451b	MI0017360	Chr17	28861371	28861438	+	UGGGUAUAGCAAGAGAACCAUUACCAUUACUAAACUCAGUAAUGGUAACGGUUUCCUUGCCAUUCCCA	#N/A	#N/A	#N/A	#N/A	#N/A
hsa-mir-451a	MI0001729	Chr17	28861369	28861440	-	CUUGGGAAUGGCAAGGAAACCGUUACCAUUACUGAGUUUAGUAAUGGUAAUGGUUCUCUUGCUAUACCCAGA	#N/A	#N/A	#N/A	#N/A	#N/A
hsa-mir-1250	MI0006385	Chr17	81133196	81133308	-	CUGUCCCGCUGGCCUGGCAGGUGACGGUGCUGGAUGUGGCCUUUUUGCCUUUUCUAAAGGCCACAUUUUCCAGCCCAUUCAACCUUCCAGAGCCCUCUGAAGUGGCCACAGGC	1.86844	-0.961623	6.3609	0.0116662	0.0249838
hsa-mir-338	MI0000814	Chr17	81125883	81125949	-	UCUCCAACAAUAUCCUGGUGCUGAGUGAUGACUCAGGCGACUCCAGCAUCAGUGAUUUUGUUGAAGA	#N/A	#N/A	#N/A	#N/A	#N/A
hsa-mir-3065	MI0014228	Chr17	81125877	81125955	+	CUGCCCUCUUCAACAAAAUCACUGAUGCUGGAGUCGCCUGAGUCAUCACUCAGCACCAGGAUAUUGUUGGAGAGGACAG	2.73295	5.71989	33.9299	5.71e-09	6.33e-08
hsa-mir-657	MI0003681	Chr17	81125276	81125373	-	GUGUAGUAGAGCUAGGAGGAGAGGGUCCUGGAGAAGCGUGGACCGGUCCGGGUGGGUUCCGGCAGGUUCUCACCCUCUCUAGGCCCCAUUCUCCUCUG	#N/A	#N/A	#N/A	#N/A	#N/A
hsa-mir-371a	MI0000779	Chr19	53787675	53787741	+	GUGGCACUCAAACUGUGGGGGCACUUUCUGCUCUCUGGUGAAAGUGCCGCCAUCUUUUGAGUGUUAC	5.66102	0.846908	6.03713	0.014008	0.02936
hsa-mir-371b	MI0017393	Chr19	53787677	53787742	-	GGUAACACUCAAAAGAUGGCGGCACUUUCACCAGAGAGCAGAAAGUGCCCCCACAGUUUGAGUGCC	1.59938	-1.19821	10.7367	0.00105032	0.00297343
hsa-mir-372	MI0000780	Chr19	53787890	53787956	+	GUGGGCCUCAAAUGUGGAGCACUAUUCUGAUGUCCAAGUGGAAAGUGCUGCGACAUUUGAGCGUCAC	7.09922	3.77077	17.4108	3.01e-05	0.00011968
hsa-mir-373	MI0000781	Chr19	53788705	53788773	+	GGGAUACUCAAAAUGGGGGCGCUUUCCUUUUUGUCUGUACUGGGAAGUGCUUCGAUUUUGGGGUGUCCC	5.67533	1.21048	6.64546	0.00994087	0.0215846
hsa-mir-23b	MI0000439	Chr9	95085208	95085304	+	CUCAGGUGCUCUGGCUGCUUGGGUUCCUGGCAUGCUGAUUUGUGACUUAAGAUUAAAAUCACAUUGCCAGGGAUUACCACGCAACCACGACCUUGGC	#N/A	#N/A	#N/A	#N/A	#N/A
hsa-mir-27b	MI0000440	Chr9	95085445	95085541	+	ACCUCUCUAACAAGGUGCAGAGCUUAGCUGAUUGGUGAACAGUGAUUGGUUUCCGCUUUGUUCACAGUGGCUAAGUUCUGCACCUGAAGAGAAGGUG	#N/A	#N/A	#N/A	#N/A	#N/A
hsa-mir-3074	MI0014181	Chr9	95086014	95086094	-	GCUCGACUCCUGUUCCUGCUGAACUGAGCCAGUGUGUAAAAUGAGAACUGAUAUCAGCUCAGUAGGCACCGGAGGGCGGGU	2.44157	2.88765	25.6471	4.1e-07	2.91e-06
hsa-mir-24-1	MI0000080	Chr9	95086021	95086088	+	CUCCGGUGCCUACUGAGCUGAUAUCAGUUCUCAUUUUACACACUGGCUCAGUUCAGCAGGAACAGGAG	1.06543	10.3719	25.0818	5.49e-07	3.61e-06
hsa-mir-508	MI0003195	ChrX	147236913	147237027	-	CCACCUUCAGCUGAGUGUAGUGCCCUACUCCAGAGGGCGUCACUCAUGUAAACUAAAACAUGAUUGUAGCCUUUUGGAGUAGAGUAAUACACAUCACGUAACGCAUAUUUGGUGG	2.57104	4.7332	10.7295	0.00105442	0.00297905
hsa-mir-507	MI0003194	ChrX	147230984	147231077	-	GUGCUGUGUGUAGUGCUUCACUUCAAGAAGUGCCAUGCAUGUGUCUAGAAAUAUGUUUUGCACCUUUUGGAGUGAAAUAAUGCACAACAGAUAC	#N/A	#N/A	#N/A	#N/A	#N/A
hsa-mir-506	MI0003193	ChrX	147230720	147230843	-	GCCACCACCAUCAGCCAUACUAUGUGUAGUGCCUUAUUCAGGAAGGUGUUACUUAAUAGAUUAAUAUUUGUAAGGCACCCUUCUGAGUAGAGUAAUGUGCAACAUGGACAACAUUUGUGGUGGC	3.36846	-0.0664021	6.26038	0.0123468	0.0262415
hsa-mir-513a-2	MI0003192	ChrX	147225826	147225952	-	GGAUGCCACAUUCAGCCAUUCAGUGUGCAGUGCCUUUCACAGGGAGGUGUCAUUUAUGUGAACUAAAAUAUAAAUUUCACCUUUCUGAGAAGGGUAAUGUACAGCAUGCACUGCAUAUGUGGUGUCC	1.82821	-1.17859	5.40321	0.0200997	0.0393328
hsa-mir-509-1	MI0003196	ChrX	147260532	147260625	-	CAUGCUGUGUGUGGUACCCUACUGCAGACAGUGGCAAUCAUGUAUAAUUAAAAAUGAUUGGUACGUCUGUGGGUAGAGUACUGCAUGACACAUG	3.22521	1.70244	10.6797	0.00108319	0.00304201
hsa-mir-509-3	MI0005717	ChrX	147259652	147259726	-	GUGGUACCCUACUGCAGACGUGGCAAUCAUGUAUAAUUAAAAAUGAUUGGUACGUCUGUGGGUAGAGUACUGCAU	2.97139	1.86587	9.91827	0.00163646	0.00440249
hsa-mir-509-2	MI0005530	ChrX	147258760	147258850	-	CAUGCUGUGUGUGGUACCCUACUGCAGACAGUGGCAAUCAUGUAUAAUUAAAAAUGAUUGGUACGUCUGUGGGUAGAGUACUGCAUGACAC	3.23326	1.7061	11.5239	0.000687078	0.00204813
hsa-mir-514b	MI0014251	ChrX	147250151	147250230	-	CAUGUGGUACUCUUCUCAAGAGGGAGGCAAUCAUGUGUAAUUAGAUAUGAUUGACACCUCUGUGAGUGGAGUAACACAUG	4.41921	-0.325981	9.90755	0.00164602	0.00441976
hsa-mir-514a-3	MI0003200	ChrX	147284641	147284728	-	GUUGUCUGUGGUACCCUACUCUGGAGAGUGACAAUCAUGUAUAACUAAAUUUGAUUGACACUUCUGUGAGUAGAGUAACGCAUGACAC	2.1364	1.94424	6.43784	0.0111714	0.024034
hsa-mir-514a-2	MI0003199	ChrX	147281943	147282030	-	GUUGUCUGUGGUACCCUACUCUGGAGAGUGACAAUCAUGUAUAACUAAAUUUGAUUGACACUUCUGUGAGUAGAGUAACGCAUGACAC	2.28388	1.97096	7.48269	0.00622949	0.0144635
hsa-mir-514a-1	MI0003198	ChrX	147279247	147279344	-	AACAUGUUGUCUGUGGUACCCUACUCUGGAGAGUGACAAUCAUGUAUAAUUAAAUUUGAUUGACACUUCUGUGAGUAGAGUAACGCAUGACACGUACG	2.21446	1.95662	7.31663	0.00683196	0.0156812
hsa-mir-510	MI0003197	ChrX	147272335	147272408	-	GUGGUGUCCUACUCAGGAGAGUGGCAAUCACAUGUAAUUAGGUGUGAUUGAAACCUCUAAGAGUGGAGUAACAC	#N/A	#N/A	#N/A	#N/A	#N/A
hsa-mir-200b	MI0000342	Chr1	1167104	1167198	+	CCAGCUCGGGCAGCCGUGGCCAUCUUACUGGGCAGCAUUGGAUGGAGUCAGGUCUCUAAUACUGCCUGGUAAUGAUGACGGCGGAGCCCUGCACG	2.32193	10.7064	27.3153	1.73e-07	1.37e-06
hsa-mir-200a	MI0000737	Chr1	1167863	1167952	+	CCGGGCCCCUGUGAGCAUCUUACCGGACAGUGCUGGAUUUCCCAGCUUGACUCUAACACUGUCUGGUAACGAUGUUCAAAGGUGACCCGC	2.72378	10.8318	35.8495	2.13e-09	2.65e-08
hsa-mir-429	MI0001641	Chr1	1169005	1169087	+	CGCCGGCCGAUGGGCGUCUUACCAGACAUGGUUAGACCUGGCCCUCUGUCUAAUACUGUCUGGUAAAACCGUCCAUCCGCUGC	3.33121	8.63897	42.9814	5.53e-11	1.13e-09
hsa-mir-199a-2	MI0000281	Chr1	172144535	172144644	-	AGGAAGCUUCUGGAGAUCCUGCUCCGUCGCCCCAGUGUUCAGACUACCUGUUCAGGACAAUGCCGUUGUACAGUAGUCUGCACAUUGGUUAGACUGGGCAAGGGAGAGCA	#N/A	#N/A	#N/A	#N/A	#N/A
hsa-mir-3120	MI0014136	Chr1	172138808	172138888	+	GUCAUGUGACUGCCUGUCUGUGCCUGCUGUACAGGUGAGCGGAUGUUCUGCACAGCAAGUGUAGACAGGCAGACACAUGAC	#N/A	#N/A	#N/A	#N/A	#N/A
hsa-mir-214	MI0000290	Chr1	172138798	172138907	-	GGCCUGGCUGGACAGAGUUGUCAUGUGUCUGCCUGUCUACACUUGCUGUGCAGAACAUCCGCUCACCUGUACAGCAGGCACAGACAGGCAGUCACAUGACAACCCAGCCU	#N/A	#N/A	#N/A	#N/A	#N/A
hsa-mir-100	MI0000102	Chr11	122152229	122152308	-	CCUGUUGCCACAAACCCGUAGAUCCGAACUUGUGGUAUUAGUCCGCACAAGCUUGUAUCUAUAGGUAUGUGUCUGUUAGG	-1.14115	11.6717	18.8072	1.45e-05	6.38e-05
hsa-mir-10526	MI0033673	Chr11	122152103	122152156	-	UCCCCUUAGUUUCCUUUAAGAGUGAUAAAAAUGGAAAAGGGGGCUGAGGUGGAG	#N/A	#N/A	#N/A	#N/A	#N/A
hsa-let-7a-2	MI0000061	Chr11	122146522	122146593	-	AGGUUGAGGUAGUAGGUUGUAUAGUUUAGAAUUACAUCAAGGGAGAUAACUGUACAGCCUCCUAGCUUUCCU	#N/A	#N/A	#N/A	#N/A	#N/A
hsa-mir-1179	MI0006272	Chr15	88608107	88608197	+	GGCUGGAAAGGAAGAAGCAUUCUUUCAUUGGUUGGUGUGUAUUGCCUUGUCAACCAAUAAGAGGAUGCCAUUUAUCCUUUUCUGACUAGCU	1.5926	-0.693458	5.34408	0.0207927	0.0403803
hsa-mir-7-2	MI0000264	Chr15	88611825	88611934	+	CUGGAUACAGAGUGGACCGGCUGGCCCCAUCUGGAAGACUAGUGAUUUUGUUGUUGUCUUACUGCGCUCAACAACAAAUCCCAGUCUACCUAAUGGUGCCAGCCAUCGCA	2.54935	0.844532	23.2942	1.39e-06	8e-06
hsa-mir-3529	MI0017351	Chr15	88611847	88611924	-	GGCACCAUUAGGUAGACUGGGAUUUGUUGUUGAGCGCAGUAAGACAACAACAAAAUCACUAGUCUUCCAGAUGGGGCC	#N/A	#N/A	#N/A	#N/A	#N/A
hsa-mir-3677	MI0016078	Chr16	2270713	2270772	+	GGCAGUGGCCAGAGCCCUGCAGUGCUGGGCAUGGGCUUCUCGUGGGCUCUGGCCACGGCC	1.93394	3.11241	27.612	1.48e-07	1.2e-06
hsa-mir-940	MI0005762	Chr16	2271747	2271840	+	GUGAGGUGUGGGCCCGGCCCCAGGAGCGGGGCCUGGGCAGCCCCGUGUGUUGAGGAAGGAAGGCAGGGCCCCCGCUCCCCGGGCCUGACCCCAC	3.44439	3.04481	53.6095	2.45e-13	8.39e-12
hsa-mir-4717	MI0017352	Chr16	2274620	2274691	+	GGCAGUGUUUAGGCCACAGCCACCCAUGUGUAGGGGUGGCUACACAUGGGUGGCUGUGGCCUAAACACUGCC	#N/A	#N/A	#N/A	#N/A	#N/A
hsa-mir-3179-1	MI0014213	Chr16	14901508	14901591	+	CAGGAUCACAGACGUUUAAAUUACACUCCUUCUGCUGUGCCUUACAGCAGUAGAAGGGGUGAAAUUUAAACGUCUGUGAUCCUG	#N/A	#N/A	#N/A	#N/A	#N/A
hsa-mir-3670-1	MI0016071	Chr16	14907717	14907781	+	UCUAGACUGGUAUAGCUGCUUUUGGAGCCUCACCUGCUGAGAGCUCACAGCUGUCCUUCUCUAGA	#N/A	#N/A	#N/A	#N/A	#N/A
hsa-mir-3180-1	MI0014214	Chr16	14911220	14911313	+	CAGUGCGACGGGCGGAGCUUCCAGACGCUCCGCCCCACGUCGCAUGCGCCCCGGGAAAGCGUGGGGCGGAGCUUCCGGAGGCCCCGCCCUGCUG	#N/A	#N/A	#N/A	#N/A	#N/A
hsa-mir-3179-2	MI0014216	Chr16	16300159	16300242	+	CAGGAUCACAGACGUUUAAAUUACACUCCUUCUGCUGUGCCUUACAGCAGUAGAAGGGGUGAAAUUUAAACGUCUGUGAUCCUG	#N/A	#N/A	#N/A	#N/A	#N/A
hsa-mir-3670-2	MI0019112	Chr16	16306370	16306434	+	UCUAGACUGGUAUAGCUGCUUUUGGAGCCUCACCUGCUGAGAGCUCACAGCUGUCCUUCUCUAGA	#N/A	#N/A	#N/A	#N/A	#N/A
hsa-mir-3180-2	MI0014215	Chr16	16309879	16309966	+	GCGACGGGCGGAGCUUCCAGACGCUCCGCCCCACGUCGCAUGCGCCCCGGGAAAGCGUGGGGCGGAGCUUCCGGAGGCCCCGCCCUGC	#N/A	#N/A	#N/A	#N/A	#N/A
hsa-mir-3179-3	MI0014221	Chr16	18411894	18411977	-	CAGGAUCACAGACGUUUAAAUUACACUCCUUCUGCUGUGCCUUACAGCAGUAGAAGGGGUGAAAUUUAAACGUCUGUGAUCCUG	#N/A	#N/A	#N/A	#N/A	#N/A
hsa-mir-3670-3	MI0031513	Chr16	18405698	18405762	-	UCUAGACUGGUAUAGCUGCUUUUGGAGCCUCACCUGCUGAGAGCUCACAGCUGUCCUUCUCUAGA	#N/A	#N/A	#N/A	#N/A	#N/A
hsa-mir-3180-3	MI0014217	Chr16	18402178	18402271	-	CAGUGCGACGGGCGGAGCUUCCAGACGCUCCGCCCCACGUCGCAUGCGCCCCGGGAAAGCGUGGGGCGGAGCUUCCGGAGGCCCCGCCCUGCUG	#N/A	#N/A	#N/A	#N/A	#N/A
hsa-mir-23a	MI0000079	Chr19	13836587	13836659	-	GGCCGGCUGGGGUUCCUGGGGAUGGGAUUUGCUUCCUGUCACAAAUCACAUUGCCAGGGAUUUCCAACCGACC	#N/A	#N/A	#N/A	#N/A	#N/A
hsa-mir-27a	MI0000085	Chr19	13836440	13836517	-	CUGAGGAGCAGGGCUUAGCUGCUUGUGAGCAGGGUCCACACCAAGUCGUGUUCACAGUGGCUAAGUUCCGCCCCCCAG	1.49227	11.0537	35.8945	2.08e-09	2.64e-08
hsa-mir-24-2	MI0000081	Chr19	13836287	13836359	-	CUCUGCCUCCCGUGCCUACUGAGCUGAAACACAGUUGGUUUGUGUACACUGGCUCAGUUCAGCAGGAACAGGG	1.08759	10.3812	25.723	3.94e-07	2.86e-06
hsa-mir-99b	MI0000746	Chr19	51692612	51692681	+	GGCACCCACCCGUAGAACCGACCUUGCGGGGCCUUCGCCGCACACAAGCUCGUGUCUGUGGGUCCGUGUC	#N/A	#N/A	#N/A	#N/A	#N/A
hsa-let-7e	MI0000066	Chr19	51692786	51692864	+	CCCGGGCUGAGGUAGGAGGUUGUAUAGUUGAGGAGGACACCCAAGGAGAUCACUAUACGGCCUCCUAGCUUUCCCCAGG	#N/A	#N/A	#N/A	#N/A	#N/A
hsa-mir-125a	MI0000469	Chr19	51693254	51693339	+	UGCCAGUCUCUAGGUCCCUGAGACCCUUUAACCUGUGAGGACAUCCAGGGUCACAGGUGAGGUUCUUGGGAGCCUGGCGUCUGGCC	#N/A	#N/A	#N/A	#N/A	#N/A
hsa-mir-6803	MI0022648	Chr19	55245186	55245250	-	CUCCUCUGGGGGUGGGGGGCUGGGCGUGGUGGACAGCGAUGCAUCCCUCGCCUUCUCACCCUCAG	1.19141	-0.463694	10.8943	0.000964598	0.00276413
hsa-mir-6802	MI0022647	Chr19	55239912	55239976	-	GAGGGCUAGGUGGGGGGCUUGAAGCCCCGAGAUGCCUCACGUCUUCACCCCUCUCACCUAAGCAG	1.27614	-0.276849	13.286	0.000267391	0.000856992
hsa-mir-6804	MI0022649	Chr19	55230885	55230952	-	GGAUGUGAGGGUGUCAGCAGGUGACGGUGGGGGCCACGCUGACAGCCGCACCUGCCUCUCACCCACAG	#N/A	#N/A	#N/A	#N/A	#N/A
hsa-mir-6724-1	MI0022559	Chr21	8205315	8205406	+	CGCUGCGCUUCUGGGCCCGCGGCGGGCGUGGGGCUGCCCGGGCCGGUCGACCAGCGCGCCGUAGCUCCCGAGGCCCGAGCCGCGACCCGCGG	#N/A	#N/A	#N/A	#N/A	#N/A
hsa-mir-10401	MI0033425	Chr21	8206563	8206618	+	CGUGUGGGAAGGCGUGGGGUGCGGACCCCGGCCCGACCUCGCCGUCCCGCCCGCCG	#N/A	#N/A	#N/A	#N/A	#N/A
hsa-mir-10401	MI0033425	Chr21	8250772	8250827	+	CGUGUGGGAAGGCGUGGGGUGCGGACCCCGGCCCGACCUCGCCGUCCCGCCCGCCG	#N/A	#N/A	#N/A	#N/A	#N/A
hsa-mir-10401	MI0033425	Chr21	8389610	8389665	+	CGUGUGGGAAGGCGUGGGGUGCGGACCCCGGCCCGACCUCGCCGUCCCGCCCGCCG	#N/A	#N/A	#N/A	#N/A	#N/A
hsa-mir-10401	MI0033425	Chr21	8433797	8433852	+	CGUGUGGGAAGGCGUGGGGUGCGGACCCCGGCCCGACCUCGCCGUCCCGCCCGCCG	#N/A	#N/A	#N/A	#N/A	#N/A
hsa-mir-3648-1	MI0016048	Chr21	8208473	8208652	+	CGCGACUGCGGCGGCGGUGGUGGGGGGAGCCGCGGGGAUCGCCGAGGGCCGGUCGGCCGCCCCGGGUGCCGCGCGGUGCCGCCGGCGGCGGUGAGGCCCCGCGCGUGUGUCCCGGCUGCGGUCGGCCGCGCUCGAGGGGUCCCCGUGGCGUCCCCUUCCCCGCCGGCCGCCUUUCUCGCG	#N/A	#N/A	#N/A	#N/A	#N/A
hsa-mir-6724-4	MI0031518	Chr21	8432530	8432621	+	CGCUGCGCUUCUGGGCCCGCGGCGGGCGUGGGGCUGCCCGGGCCGGUCGACCAGCGCGCCGUAGCUCCCGAGGCCCGAGCCGCGACCCGCGG	#N/A	#N/A	#N/A	#N/A	#N/A
hsa-mir-10401	MI0033425	Chr21	8206563	8206618	+	CGUGUGGGAAGGCGUGGGGUGCGGACCCCGGCCCGACCUCGCCGUCCCGCCCGCCG	#N/A	#N/A	#N/A	#N/A	#N/A
hsa-mir-10401	MI0033425	Chr21	8250772	8250827	+	CGUGUGGGAAGGCGUGGGGUGCGGACCCCGGCCCGACCUCGCCGUCCCGCCCGCCG	#N/A	#N/A	#N/A	#N/A	#N/A
hsa-mir-10401	MI0033425	Chr21	8389610	8389665	+	CGUGUGGGAAGGCGUGGGGUGCGGACCCCGGCCCGACCUCGCCGUCCCGCCCGCCG	#N/A	#N/A	#N/A	#N/A	#N/A
hsa-mir-10401	MI0033425	Chr21	8433797	8433852	+	CGUGUGGGAAGGCGUGGGGUGCGGACCCCGGCCCGACCUCGCCGUCCCGCCCGCCG	#N/A	#N/A	#N/A	#N/A	#N/A
hsa-mir-10396b	MI0033426	Chr21	8436324	8436374	+	CGGCGGGGCUCGGAGCCGGGCUUCGGCCGGGCCCCGGGCCCUCGACCGGAC	#N/A	#N/A	#N/A	#N/A	#N/A
hsa-let-7a-3	MI0000062	Chr22	46112749	46112822	+	GGGUGAGGUAGUAGGUUGUAUAGUUUGGGGCUCUGCCCUGCUAUGGGAUAACUAUACAAUCUACUGUCUUUCCU	#N/A	#N/A	#N/A	#N/A	#N/A
hsa-mir-4763	MI0017404	Chr22	46113566	46113657	+	CCUGUCCCUCCUGCCCUGCGCCUGCCCAGCCCUCCUGCUCUGGUGACUGAGGACCGCCAGGCAGGGGCUGGUGCUGGGCGGGGGGCGGCGGG	2.87668	-0.880497	28.4873	9.43e-08	8.19e-07
hsa-let-7b	MI0000063	Chr22	46113686	46113768	+	CGGGGUGAGGUAGUAGGUUGUGUGGUUUCAGGGCAGUGAUGUUGCCCCUCGGAAGAUAACUAUACAACCUACUGCCUUCCCUG	#N/A	#N/A	#N/A	#N/A	#N/A
hsa-mir-449c	MI0003823	Chr5	55172262	55172353	-	GCUGGGAUGUGUCAGGUAGGCAGUGUAUUGCUAGCGGCUGUUAAUGAUUUUAACAGUUGCUAGUUGCACUCCUCUCUGUUGCAUUCAGAAGC	#N/A	#N/A	#N/A	#N/A	#N/A
hsa-mir-449b	MI0003673	Chr5	55170646	55170742	-	UGACCUGAAUCAGGUAGGCAGUGUAUUGUUAGCUGGCUGCUUGGGUCAAGUCAGCAGCCACAACUACCCUGCCACUUGCUUCUGGAUAAAUUCUUCU	2.93125	-0.680121	10.924	0.000949275	0.00273695
hsa-mir-449a	MI0001648	Chr5	55170532	55170622	-	CUGUGUGUGAUGAGCUGGCAGUGUAUUGUUAGCUGGUUGAAUAUGUGAAUGGCAUCGGCUAACAUGCAACUGCUGUCUUAUUGCAUAUACA	2.90125	0.673722	13.1824	0.000282594	0.00090161
hsa-mir-106b	MI0000734	Chr7	100093993	100094074	-	CCUGCCGGGGCUAAAGUGCUGACAGUGCAGAUAGUGGUCCUCUCCGUGCUACCGCACUGUGGGUACUUGCUGCUCCAGCAGG	2.05505	9.78913	61.2625	5e-15	2.34e-13
hsa-mir-93	MI0000095	Chr7	100093768	100093847	-	CUGGGGGCUCCAAAGUGCUGUUCGUGCAGGUAGUGUGAUUACCCAACCUACUGCUGAGCUAGCACUUCCCGAGCCCCCGG	2.6532	13.3239	66.2697	3.93e-16	2.63e-14
hsa-mir-25	MI0000082	Chr7	100093560	100093643	-	GGCCAGUGUUGAGAGGCGGAGACUUGGGCAAUUGCUGGACGCUGCCCUGGGCAUUGCACUUGUCUCGGUCUGACAGUGCCGGCC	1.17689	13.5241	26.4071	2.77e-07	2.08e-06
hsa-mir-183	MI0000273	Chr7	129774905	129775014	-	CCGCAGAGUGUGACUCCUGUUCUGUGUAUGGCACUGGUAGAAUUCACUGUGAACAGUCUCAGUCAGUGAAUUACCGAAGGGCCAUAAACAGAGCAGAGACAGAUCCACGA	3.57545	13.7964	67.96	1.67e-16	1.38e-14
hsa-mir-96	MI0000098	Chr7	129774692	129774769	-	UGGCCGAUUUUGGCACUAGCACAUUUUUGCUUGUGUCUCUCCGCUCUGAGCAAUCAUGUGCAGUGCCAAUAUGGGAAA	4.29787	5.35443	82.3207	1.16e-19	4.64e-17
hsa-mir-182	MI0000272	Chr7	129770383	129770492	-	GAGCUGCUUGCCUCCCCCCGUUUUUGGCAAUGGUAGAACUCACACUGGUGAGGUAACAGGAUCCGGUGGUUCUAGACUUGCCAACUAUGGGGCGAGGACUCAGCCGGCAC	2.83006	14.6162	52.7984	3.7e-13	1.18e-11
hsa-mir-5692a-2	MI0019298	Chr8	12719132	12719190	+	UACAAAUAAUACCACAGUGGGUGUACCUCAUGUGUGUACACCCUGUGAUAUUAUUUGUA	#N/A	#N/A	#N/A	#N/A	#N/A
hsa-mir-3926-1	MI0016434	Chr8	12727232	12727304	-	AAAAUGGAGCUGGCCAAAAAGCAGGCAGAGACUUUAAAAGCGUCUCUGCCUGCUUUUUGGCCAGCUCCGUUUU	#N/A	#N/A	#N/A	#N/A	#N/A
hsa-mir-3926-2	MI0016437	Chr8	12727237	12727299	+	GGAGCUGGCCAAAAAGCAGGCAGAGACGCUUUUAAAGUCUCUGCCUGCUUUUUGGCCAGCUCC	#N/A	#N/A	#N/A	#N/A	#N/A
hsa-mir-6849	MI0022695	Chr8	144400277	144400345	-	CCUGGGAGUGGAUAGGGGAGUGUGUGGAGAGAGCACUGAGCCUGCCCACCAGCCUGUGUCCACCUCCAG	#N/A	#N/A	#N/A	#N/A	#N/A
hsa-mir-1234	MI0006324	Chr8	144400086	144400165	-	GUGAGUGUGGGGUGGCUGGGGCGGGGGGGGCCCGGGGACGGCUUGGGCCUGCCUAGUCGGCCUGACCACCCACCCCACAG	1.12606	-1.03803	5.49713	0.0190477	0.0377999
hsa-mir-939	MI0005761	Chr8	144394149	144394230	-	UGUGGGCAGGGCCCUGGGGAGCUGAGGCUCUGGGGGUGGCCGGGGCUGACCCUGGGCCUCUGCUCCCCAGUGUCUGACCGCG	2.40743	0.667343	39.3038	3.63e-10	5.67e-09
hsa-let-7a-1	MI0000060	Chr9	94175957	94176036	+	UGGGAUGAGGUAGUAGGUUGUAUAGUUUUAGGGUCACACCCACCACUGGGAGAUAACUAUACAAUCUACUGUCUUUCCUA	#N/A	#N/A	#N/A	#N/A	#N/A
hsa-let-7f-1	MI0000067	Chr9	94176347	94176433	+	UCAGAGUGAGGUAGUAGAUUGUAUAGUUGUGGGGUAGUGAUUUUACCCUGUUCAGGAGAUAACUAUACAAUCUAUUGCCUUCCCUGA	#N/A	#N/A	#N/A	#N/A	#N/A
hsa-let-7d	MI0000065	Chr9	94178834	94178920	+	CCUAGGAAGAGGUAGUAGGUUGCAUAGUUUUAGGGCAGGGAUUUUGCCCACAAGGAGGUAACUAUACGACCUGCUGCCUUUCUUAGG	1.0319	9.29353	26.9391	2.1e-07	1.62e-06
hsa-mir-374c	MI0016684	ChrX	74218549	74218618	+	ACACGGACAAUGAUAAUACAACCUGCUAAGUGCUAGGACACUUAGCAGGUUGUAUUAUAUCCAUCCGAGU	#N/A	#N/A	#N/A	#N/A	#N/A
hsa-mir-374b	MI0005566	ChrX	74218547	74218618	-	ACUCGGAUGGAUAUAAUACAACCUGCUAAGUGUCCUAGCACUUAGCAGGUUGUAUUAUCAUUGUCCGUGUCU	#N/A	#N/A	#N/A	#N/A	#N/A
hsa-mir-421	MI0003685	ChrX	74218377	74218461	-	GCACAUUGUAGGCCUCAUUAAAUGUUUGUUGAAUGAAAAAAUGAAUCAUCAACAGACAUUAAUUGGGCGCCUGCUCUGUGAUCUC	1.61974	2.64675	33.6203	6.7e-09	7.31e-08
hsa-mir-105-2	MI0000112	ChrX	152394412	152394492	-	UGUGCAUCGUGGUCAAAUGCUCAGACUCCUGUGGUGGCUGCUUAUGCACCACGGAUGUUUGAGCAUGUGCUAUGGUGUCUA	4.81072	6.14722	19.8715	8.28e-06	3.79e-05
hsa-mir-767	MI0003763	ChrX	152393421	152393529	-	GCUUUUAUAUUGUAGGUUUUUGCUCAUGCACCAUGGUUGUCUGAGCAUGCAGCAUGCUUGUCUGCUCAUACCCCAUGGUUUCUGAGCAGGAACCUUCAUUGUCUACUGC	5.4431	6.69613	23.2789	1.4e-06	8.01e-06
hsa-mir-105-1	MI0000111	ChrX	152392219	152392299	-	UGUGCAUCGUGGUCAAAUGCUCAGACUCCUGUGGUGGCUGCUCAUGCACCACGGAUGUUUGAGCAUGUGCUACGGUGUCUA	4.88996	6.14091	19.8668	8.3e-06	3.79e-05
hsa-mir-30e	MI0000749	Chr1	40754355	40754446	+	GGGCAGUCUUUGCUACUGUAAACAUCCUUGACUGGAAGCUGUAAGGUGUUCAGAGGAGCUUUCAGUCGGAUGUUUACAGCGGCAGGCUGCCA	#N/A	#N/A	#N/A	#N/A	#N/A
hsa-mir-30c-1	MI0000736	Chr1	40757284	40757372	+	ACCAUGCUGUAGUGUGUGUAAACAUCCUACACUCUCAGCUGUGAGCUCAAGGUGGCUGGGAGAGGGUUGUUUACUCCUUCUGCCAUGGA	#N/A	#N/A	#N/A	#N/A	#N/A
hsa-mir-4421	MI0016758	Chr1	51059837	51059905	+	CUGGGUCUCCUUUCUGCUGAGAGUUGAACACUUGUUGGGACAACCUGUCUGUGGAAAGGAGCUACCUAC	#N/A	#N/A	#N/A	#N/A	#N/A
hsa-mir-6500	MI0022211	Chr1	51060018	51060103	+	CCUGCCUGCAGAAAGGAGCUAUCCACUCCAGGUGUCCUUUCUUCUGAGAGCUGGACACUUGUUGGGAUGACCUGCCUGCAGGUAGG	#N/A	#N/A	#N/A	#N/A	#N/A
hsa-mir-3116-1	MI0014128	Chr1	62078786	62078859	+	CUUUAUUGAGUCCCUACUAUGUUCCAGGCACUGGGUAUCGUAGGUGCCUGGAACAUAGUAGGGACUCAAUAAAG	#N/A	#N/A	#N/A	#N/A	#N/A
hsa-mir-3116-2	MI0014129	Chr1	62078789	62078856	-	UAUUGAGUCCCUACUAUGUUCCAGGCACCUACGAUACCCAGUGCCUGGAACAUAGUAGGGACUCAAUA	#N/A	#N/A	#N/A	#N/A	#N/A
hsa-mir-101-1	MI0000103	Chr1	65058434	65058508	-	UGCCCUGGCUCAGUUAUCACAGUGCUGAUGCUGUCUAUUCUAAAGGUACAGUACUGUGAUAACUGAAGGAUGGCA	#N/A	#N/A	#N/A	#N/A	#N/A
hsa-mir-3671	MI0016072	Chr1	65057755	65057842	-	AUGUUAUUGCUGCUGCUGUCACAUUUACAUGAAAAUAAAAUGUAAAUUAUUUUAUUUCUAUCAAAUAAGGACUAGUCUGCAGUGAUAU	#N/A	#N/A	#N/A	#N/A	#N/A
hsa-mir-137	MI0000454	Chr1	98046070	98046171	-	GGUCCUCUGACUCUCUUCGGUGACGGGUAUUCUUGGGUGGAUAAUACGGAUUACGUUGUUAUUGCUUAAGAAUACGCGUAGUCGAGGAGAGUACCAGCGGCA	3.26622	1.47113	9.8391	0.00170841	0.00455253
hsa-mir-2682	MI0012063	Chr1	98045242	98045351	-	ACCUUCCUGAAAGAGGUUGGGGCAGGCAGUGACUGUUCAGACGUCCAAUCUCUUUGGGACGCCUCUUCAGCGCUGUCUUCCCUGCCUCUGCCUUUAGGACGAGUCUCAAA	2.83385	-0.938449	7.7622	0.00533508	0.0125947
hsa-mir-3119-1	MI0014134	Chr1	170151378	170151462	-	AUUAACUCUGGCUUUUAACUUUGAUGGCAAAGGGGUAGCUAAACAAUCUAUGUCUUUGCCAUCAAAGUUAAAAGCCAUAGUUAAU	#N/A	#N/A	#N/A	#N/A	#N/A
hsa-mir-3119-2	MI0014135	Chr1	170151378	170151462	+	AUUAACUAUGGCUUUUAACUUUGAUGGCAAAGACAUAGAUUGUUUAGCUACCCCUUUGCCAUCAAAGUUAAAAGCCAGAGUUAAU	#N/A	#N/A	#N/A	#N/A	#N/A
hsa-mir-1295b	MI0019146	Chr1	171101739	171101798	+	CACCCAGAUCUGCGGCCUAAUCACAGGCCACAUUUCUGAAUAGGCCACGGAUCUGGGCAA	#N/A	#N/A	#N/A	#N/A	#N/A
hsa-mir-1295a	MI0006357	Chr1	171101728	171101806	-	AGGACAUUUUGCCCAGAUCCGUGGCCUAUUCAGAAAUGUGGCCUGUGAUUAGGCCGCAGAUCUGGGUGAAAUGUCCUCC	2.48303	0.20332	15.7637	7.18e-05	0.000262274
hsa-mir-181a-1	MI0000289	Chr1	198859044	198859153	-	UGAGUUUUGAGGUUGCUUCAGUGAACAUUCAACGCUGUCGGUGAGUUUGGAAUUAAAAUCAAAACCAUCGACCGUUGAUUGUACCCUAUGGCUAACCAUCAUCUACUCCA	1.45833	9.81433	36.5842	1.46e-09	1.87e-08
hsa-mir-181b-1	MI0000270	Chr1	198858873	198858982	-	CCUGUGCAGAGAUUAUUUUUUAAAAGGUCACAAUCAACAUUCAUUGCUGUCGGUGGGUUGAACUGUGUGGACAAGCUCACUGAACAAUGAAUGCAACUGUGGCCCCGCUU	1.87357	7.64534	41.1455	1.41e-10	2.55e-09
hsa-mir-29b-2	MI0000107	Chr1	207802443	207802523	-	CUUCUGGAAGCUGGUUUCACAUGGUGGCUUAGAUUUUUCCAUCUUUGUAUCUAGCACCAUUUGAAAUCAGUGUUUUAGGAG	1.11925	8.78571	16.8645	4.01e-05	0.000153073
hsa-mir-29c	MI0000735	Chr1	207801852	207801939	-	AUCUCUUACACAGGCUGACCGAUUUCUCCUGGUGUUCAGAGUCUGUUUUUGUCUAGCACCAUUUGAAAUCGGUUAUGAUGUAGGGGGA	#N/A	#N/A	#N/A	#N/A	#N/A
hsa-mir-194-1	MI0000488	Chr1	220118157	220118241	-	AUGGUGUUAUCAAGUGUAACAGCAACUCCAUGUGGACUGUGUACCAAUUUCCAGUGGAGAUGCUGUUACUUUUGAUGGUUACCAA	2.49631	7.35738	24.5279	7.32e-07	4.65e-06
hsa-mir-215	MI0000291	Chr1	220117853	220117962	-	AUCAUUCAGAAAUGGUAUACAGGAAAAUGACCUAUGAAUUGACAGACAAUAUAGCUGAGUUUGUCUGUCAUUUCUUUAGGCCAAUAUUCUGUAUGACUGUGCUACUUCAA	5.32403	5.13135	28.3797	9.97e-08	8.45e-07
hsa-mir-3155a	MI0014183	Chr10	6152196	6152277	+	UCCGGGCAUCACCUCCCACUGCAGAGCCUGGGGAGCCGGACAGCUCCCUUCCCAGGCUCUGCAGUGGGAACUGAUGCCUGGA	#N/A	#N/A	#N/A	#N/A	#N/A
hsa-mir-3155b	MI0016839	Chr10	6152207	6152262	-	CCACUGCAGAGCCUGGGAAGGGAGCUGUCCGGCUCCCCAGGCUCUGCAGUGGGAGG	#N/A	#N/A	#N/A	#N/A	#N/A
hsa-mir-4679-1	MI0017310	Chr10	89063336	89063410	+	GUCUUUUUUCUGUGAUAGAGAUUCUUUGCUUUGUUAGAAACAAAAAGCAAAGAAUCUCUAUCACAGAAAAAAGAU	#N/A	#N/A	#N/A	#N/A	#N/A
hsa-mir-4679-2	MI0017311	Chr10	89063335	89063411	-	UAUCUUUUUUCUGUGAUAGAGAUUCUUUGCUUUUUGUUUCUAACAAAGCAAAGAAUCUCUAUCACAGAAAAAAGACG	#N/A	#N/A	#N/A	#N/A	#N/A
hsa-mir-3158-1	MI0014186	Chr10	101601417	101601497	+	AUUCAGGCCGGUCCUGCAGAGAGGAAGCCCUUCUGCUUACAGGUAUUGGAAGGGCUUCCUCUCUGCAGGACCGGCCUGAAU	1.44291	-0.687224	10.377	0.00127594	0.0035201
hsa-mir-3158-2	MI0014187	Chr10	101601417	101601497	-	AUUCAGGCCGGUCCUGCAGAGAGGAAGCCCUUCCAAUACCUGUAAGCAGAAGGGCUUCCUCUCUGCAGGACCGGCCUGAAU	1.51022	-0.829314	10.0247	0.00154455	0.00417919
hsa-mir-6715a	MI0022548	Chr10	112299612	112299690	+	UGGGCUGCGUCCACAGGCACAGCCGGUUUGAGCAUUUUUACUGAAUUGCCAAACCAGUCGUGCCUGUGGGCACAACCUU	3.41062	0.499653	8.87489	0.0028912	0.00731639
hsa-mir-6715b	MI0022549	Chr10	112299612	112299688	-	GGUUGUGCCCACAGGCACGACUGGUUUGGCAAUUCAGUAAAAAUGCUCAAACCGGCUGUGCCUGUGGACGCAGCCCA	5.2498	0.790786	16.7852	4.19e-05	0.000159174
hsa-mir-3160-2	MI0014190	Chr11	46451807	46451887	+	ACCUGCCCUGGGCUUUCUAGUCUCAGCUCUCCUGACCAGCUGAGCUGGAGGAGAGCUGAGACUAGAAAGCCCAGGGCAGGU	#N/A	#N/A	#N/A	#N/A	#N/A
hsa-mir-3160-1	MI0014189	Chr11	46451805	46451889	-	GGACCUGCCCUGGGCUUUCUAGUCUCAGCUCUCCUCCAGCUCAGCUGGUCAGGAGAGCUGAGACUAGAAAGCCCAGGGCAGGUUC	#N/A	#N/A	#N/A	#N/A	#N/A
hsa-mir-6748	MI0022593	Chr11	62789815	62789885	+	UGGUGUGUGGGUGGGAAGGACUGGAUUUGAAAUGGUCCCACUCCUGACGAUCCUGUCCCUGUCUCCUACAG	2.02017	-0.830313	14.3072	0.000155269	0.000521394
hsa-mir-6514	MI0022226	Chr11	62792702	62792771	-	UAUGGAGUGGACUUUCAGCUGGCAUUUACGAGUCAGAGUUCUUACAGAGCUGCCUGUUCUUCCACUCCAG	1.77056	-0.187514	25.3427	4.8e-07	3.2e-06
hsa-mir-7113	MI0022964	Chr11	68032864	68032922	+	CUCCAGGGAGACAGUGUGUGAGGCCUCUUGCCAUGGCCUCCCUGCCCGCCUCUCUGCAG	1.40542	-1.07934	7.65361	0.00566588	0.0133005
hsa-mir-4691	MI0017324	Chr11	68033897	68033981	+	GGAGCACUCCCAGGUCCUCCAGGCCAUGAGCUGCGGCCCUGAUGUCUCUACUCCAGCCACGGACUGAGAGUGCAUAGGAGUGUCC	2.35403	-0.617798	14.5799	0.000134341	0.000459898
hsa-mir-34b	MI0000742	Chr11	111512938	111513021	+	GUGCUCGGUUUGUAGGCAGUGUCAUUAGCUGAUUGUACUGUGGUGGUUACAAUCACUAACUCCACUGCCAUCAAAACAAGGCAC	2.71307	1.67467	29.5354	5.49e-08	5.08e-07
hsa-mir-34c	MI0000743	Chr11	111513439	111513515	+	AGUCUAGUUACUAGGCAGUGUAGUUAGCUGAUUGCUAAUAGUACCAAUCACUAACCACACGGCCAGGUAAAAAGAUU	2.36735	3.97946	29.2876	6.24e-08	5.7e-07
hsa-mir-200c	MI0000650	Chr12	6963699	6963766	+	CCCUCGUCUUACCCAGCAGUGUUUGGGUGCGGUUGGGAGUCUCUAAUACUGCCGGGUAAUGAUGGAGG	2.01744	14.0651	27.6482	1.46e-07	1.18e-06
hsa-mir-141	MI0000457	Chr12	6964097	6964191	+	CGGCCGGCCCUGGGUCCAUCUUCCAGUACAGUGUUGGAUGGUCUAAUUGUGAAGCUCCUAACACUGUCUGGUAAAGAUGGCUCCCGGGUGGGUUC	3.09455	11.3413	52.3952	4.54e-13	1.42e-11
hsa-mir-6758	MI0022603	Chr12	57512688	57512750	+	UGGGCUAGAGAGGGGAAGGAUGUGAUGUGAGCAGAUGGUUCUCACUCAUUCUCCUCUGUCCAG	#N/A	#N/A	#N/A	#N/A	#N/A
hsa-mir-616	MI0003629	Chr12	57519163	57519259	-	UUAGGUAAUUCCUCCACUCAAAACCCUUCAGUGACUUCCAUGACAUGAAAUAGGAAGUCAUUGGAGGGUUUGAGCAGAGGAAUGACCUGUUUUAAAA	2.50141	1.38871	40.2017	2.29e-10	3.79e-09
hsa-mir-548c	MI0003630	Chr12	64622509	64622605	+	CAUUGGCAUCUAUUAGGUUGGUGCAAAAGUAAUUGCGGUUUUUGCCAUUACUUUCAGUAGCAAAAAUCUCAAUUACUUUUGCACCAACUUAAUACUU	#N/A	#N/A	#N/A	#N/A	#N/A
hsa-mir-548z	MI0016688	Chr12	64622509	64622605	-	AAGUAUUAAGUUGGUGCAAAAGUAAUUGAGAUUUUUGCUACUGAAAGUAAUGGCAAAAACCGCAAUUACUUUUGCACCAACCUAAUAGAUGCCAAUG	#N/A	#N/A	#N/A	#N/A	#N/A
hsa-mir-3913-2	MI0016418	Chr12	69584723	69584822	+	UGUCUAUAAUAAACUGAAAUAUUUGGGACUGAUCUUGAUGUCUGCCAAGGUUUUGGCAGACAUCAAGAUCAGUCCCAAAUAUUUCAGUUUAUUAUAAACA	1.99485	1.97573	21.4594	3.61e-06	1.82e-05
hsa-mir-3913-1	MI0016417	Chr12	69584722	69584823	-	UUGUUUAUAAUAAACUGAAAUAUUUGGGACUGAUCUUGAUGUCUGCCAAAACCUUGGCAGACAUCAAGAUCAGUCCCAAAUAUUUCAGUUUAUUAUAGACAG	2.6903	2.00146	35.8523	2.13e-09	2.65e-08
hsa-mir-5700	MI0019307	Chr12	94561789	94561859	+	UUAAUUAAUGCAUUAAAUUAUUGAAGGCCCUUGGGCACCCCAGGCCUUCAAUAAUUUAAUGCAUUUAUUGA	#N/A	#N/A	#N/A	#N/A	#N/A
hsa-mir-7844	MI0025514	Chr12	94571231	94571352	-	UGAUUGUGCGGACUCGUGUGUAAGAAAAACUAGGACUGUGUGGUGUAAAUAACUACAAUUCUCUUAACUCCGUAGCAGUUGCCAACUCAGUCCUUGUACUUCGUUAACACGAAUCUGUUUCA	#N/A	#N/A	#N/A	#N/A	#N/A
hsa-mir-331	MI0000812	Chr12	95308420	95308513	+	GAGUUUGGUUUUGUUUGGGUUUGUUCUAGGUAUGGUCCCAGGGAUCCCAGAUCAAACCAGGCCCCUGGGCCUAUCCUAGAACCAACCUAAGCUC	2.27612	5.00262	55.5567	9.08e-14	3.36e-12
hsa-mir-3685	MI0016086	Chr12	95309923	95309984	+	GUACAUUUCCUACCCUACCUGAAGACUUGAGAUUAUAGUCUUUGGGGGGAUGGGCAAAGUAC	#N/A	#N/A	#N/A	#N/A	#N/A
hsa-mir-15a	MI0000069	Chr13	50049119	50049201	-	CCUUGGAGUAAAGUAGCAGCACAUAAUGGUUUGUGGAUUUUGAAAAGGUGCAGGCCAUAUUGUGCUGCCUCAAAAAUACAAGG	1.71047	7.78421	48.2301	3.79e-12	9.88e-11
hsa-mir-16-1	MI0000070	Chr13	50048973	50049061	-	GUCAGCAGUGCCUUAGCAGCACGUAAAUAUUGGCGUUAAGAUUCUAAAAUUAUCUCCAGUAUUAACUGUGCUGCUGAAGUAAGGUUGAC	1.49178	8.12971	42.4562	7.23e-11	1.43e-09
hsa-mir-342	MI0000805	Chr14	100109655	100109753	+	GAAACUGGGCUCAAGGUGAGGGGUGCUAUCUGUGAUUGAGGGACAUGGUUAAUGGAAUUGUCUCACACAGAAAUCGCACCCGUCACCUUGGCCUACUUA	#N/A	#N/A	#N/A	#N/A	#N/A
hsa-mir-151b	MI0003772	Chr14	100109419	100109514	-	ACCUCUGAUGUGUCAGUCUCUCUUCAGGGCUCCCGAGACACAGAAACAGACACCUGCCCUCGAGGAGCUCACAGUCUAGACAAACAAACCCAGGGU	#N/A	#N/A	#N/A	#N/A	#N/A
hsa-mir-203a	MI0000283	Chr14	104117405	104117514	+	GUGUUGGGGACUCGCGCGCUGGGUCCAGUGGUUCUUAACAGUUCAACAGUUCUGUAGCGCAAUUGUGAAAUGUUUAGGACCACUAGACCCGGCGGGCGCGGCGACAGCGA	1.98784	14.9705	11.5778	0.000667423	0.00199801
hsa-mir-203b	MI0017343	Chr14	104117418	104117503	-	GCGCCCGCCGGGUCUAGUGGUCCUAAACAUUUCACAAUUGCGCUACAGAACUGUUGAACUGUUAAGAACCACUGGACCCAGCGCGC	3.4925	6.08411	18.4599	1.74e-05	7.47e-05
hsa-mir-7973-1	MI0025748	Chr15	51314034	51314109	+	UGUGACCCUAGAAUAAUUACCCAACGUCUCUGAGUCUCGGUUUUGAGAGGGUGAGUAAUUAUUCUAGGGUCACACA	#N/A	#N/A	#N/A	#N/A	#N/A
hsa-mir-7973-2	MI0025749	Chr15	51314032	51314107	-	UGUGACCCUAGAAUAAUUACUCACCCUCUCAAAACCGAGACUCAGAGACGUUGGGUAAUUAUUCUAGGGUCACACA	#N/A	#N/A	#N/A	#N/A	#N/A
hsa-mir-5587	MI0019144	Chr16	535316	535368	+	AUGGUCACCUCCGGGACUCAGCCCUGUGCUGAGCCCCGGGCAGUGUGAUCAUC	#N/A	#N/A	#N/A	#N/A	#N/A
hsa-mir-3176	MI0014210	Chr16	543277	543366	+	UGGCCUCUCCAGUCUGCAGCUCCCGGCAGCCUCGGGCCACACUCCCGGGAUCCCCAGGGACUGGCCUGGGACUACCGGGGGUGGCGGCCG	2.8523	-0.471667	22.343	2.28e-06	1.22e-05
hsa-mir-4516	MI0016882	Chr16	2133119	2133204	+	AGGGAGAAGGGUCGGGGCAGGGAGGGCAGGGCAGGCUCUGGGGUGGGGGGUCUGUGAGUCAGCCACGGCUCUGCCCACGUCUCCCC	#N/A	#N/A	#N/A	#N/A	#N/A
hsa-mir-3180-5	MI0016409	Chr16	2135977	2136129	-	GCUCCGCCCCACGUCGCAUGCGCCCCGGGAACGCGUGGGGCGGAGCUUCCGGAGGCCCCGCCCUGCUGCCGACCCUGUGGAGCGGAGGGUGAAGCCUCCGGAUGCCAGUCCCUCAUCGCUGGCCCGGUCGCGCUGUGGCGAAGGGGGCGGAGC	#N/A	#N/A	#N/A	#N/A	#N/A
hsa-mir-193b	MI0003137	Chr16	14303967	14304049	+	GUGGUCUCAGAAUCGGGGUUUUGAGGGCGAGAUGAGUUUAUGUUUUAUCCAACUGGCCCUCAAAGUCCCGCUUUUGGGGUCAU	2.33231	7.47805	44.6013	2.42e-11	5.31e-10
hsa-mir-365a	MI0000767	Chr16	14309285	14309371	+	ACCGCAGGGAAAAUGAGGGACUUUUGGGGGCAGAUGUGUUUCCAUUCCACUAUCAUAAUGCCCCUAAAAAUCCUUAUUGCUCUUGCA	#N/A	#N/A	#N/A	#N/A	#N/A
hsa-mir-6511a-1	MI0022223	Chr16	14925937	14926003	+	CCUGCAGGCAGAAGUGGGGCUGACAGGGCAGAGGGUUGCGCCCCCUCACCAUCCCUUCUGCCUGCAG	#N/A	#N/A	#N/A	#N/A	#N/A
hsa-mir-6770-1	MI0022615	Chr16	14930820	14930879	+	UAUCCUGAGAAGGCACAGCUUGCACGUGACCUCCUGGGCCUGGCGGCUGUGUCUUCACAG	#N/A	#N/A	#N/A	#N/A	#N/A
hsa-mir-6511a-2	MI0023564	Chr16	16324588	16324654	+	CCUGCAGGCAGAAGUGGGGCUGACAGGGCAGAGGGUUGCGCCCCCUCACCAUCCCUUCUGCCUGCAG	#N/A	#N/A	#N/A	#N/A	#N/A
hsa-mir-6770-2	MI0026418	Chr16	16329305	16329364	+	UAUCCUGAGAAGGCACAGCUUGCACGUGACCUCCUGGGCCUGGCGGCUGUGUCUUCACAG	#N/A	#N/A	#N/A	#N/A	#N/A
hsa-mir-3179-4	MI0031510	Chr16	18494493	18494576	-	CAGGAUCACAGACGUUUAAAUUACACUCCUUCUGCUGUGCCUUACAGCAGUAGAAGGGGUGAAAUUUAAACGUCUGUGAUCCUG	#N/A	#N/A	#N/A	#N/A	#N/A
hsa-mir-3670-4	MI0031514	Chr16	18488301	18488365	-	UCUAGACUGGUAUAGCUGCUUUUGGAGCCUCACCUGCUGAGAGCUCACAGCUGUCCUUCUCUAGA	#N/A	#N/A	#N/A	#N/A	#N/A
hsa-mir-212	MI0000288	Chr17	2050271	2050380	-	CGGGGCACCCCGCCCGGACAGCGCGCCGGCACCUUGGCUCUAGACUGCUUACUGCCCGGGCCGCCCUCAGUAACAGUCUCCAGUCACGGCCACCGACGCCUGGCCCCGCC	#N/A	#N/A	#N/A	#N/A	#N/A
hsa-mir-132	MI0000449	Chr17	2049908	2050008	-	CCGCCCCCGCGUCUCCAGGGCAACCGUGGCUUUCGAUUGUUACUGUGGGAACUGGAGGUAACAGUCUACAGCCAUGGUCGCCCCGCAGCACGCCCACGCGC	#N/A	#N/A	#N/A	#N/A	#N/A
hsa-mir-6865	MI0022712	Chr17	4970086	4970150	-	AUCCAUAGGUGGCAGAGGAGGGACUUCAGAUGCUUCAUGACACCCUCUUUCCCUACCGCCUACAG	#N/A	#N/A	#N/A	#N/A	#N/A
hsa-mir-6864	MI0022711	Chr17	4969702	4969771	-	GAAAGUUGAAGGGACAAGUCAGAUAUGCCAUUAUGUGGGUCAUGAGGUGGUGAGACUUCUCUCCCUUCAG	#N/A	#N/A	#N/A	#N/A	#N/A
hsa-mir-4520-2	MI0017358	Chr17	6655449	6655502	+	CCUGCGUGUUUUCUGUCCAAAUCCUUUUCUGAUUUGGACAGAAAACACGCAGGU	1.14476	-1.27298	5.87399	0.0153662	0.0318516
hsa-mir-4520-1	MI0016886	Chr17	6655440	6655509	-	GUGUGCCACCUGCGUGUUUUCUGUCCAAAUCAGAAAAGGAUUUGGACAGAAAACACGCAGGAAGAAGGAA	1.39448	-1.24256	7.82225	0.00516068	0.012224
hsa-mir-497	MI0003138	Chr17	7017911	7018022	-	CCACCCCGGUCCUGCUCCCGCCCCAGCAGCACACUGUGGUUUGUACGGCACUGUGGCCACGUCCAAACCACACUGUGGUGUUAGAGCGAGGGUGGGGGAGGCACCGCCGAGG	#N/A	#N/A	#N/A	#N/A	#N/A
hsa-mir-195	MI0000489	Chr17	7017615	7017701	-	AGCUUCCCUGGCUCUAGCAGCACAGAAAUAUUGGCACAGGGAAGCGAGUCUGCCAAUAUUGGCUGUGCUGCUCCAGGCAGGGUGGUG	-1.16264	4.79212	34.9436	3.39e-09	4.05e-08
hsa-mir-33b	MI0003646	Chr17	17813836	17813931	-	GCGGGCGGCCCCGCGGUGCAUUGCUGUUGCAUUGCACGUGUGUGAGGCGGGUGCAGUGCCUCGGCAGUGCAGCCCGGAGCCGGCCCCUGGCACCAC	3.6505	2.04881	47.803	4.71e-12	1.18e-10
hsa-mir-6777	MI0022622	Chr17	17813480	17813545	-	UCAAGACGGGGAGUCAGGCAGUGGUGGAGAUGGAGAGCCCUGAGCCUCCACUCUCCUGGCCCCCAG	2.92208	-0.26128	27.7034	1.41e-07	1.16e-06
hsa-mir-423	MI0001445	Chr17	30117079	30117172	+	AUAAAGGAAGUUAGGCUGAGGGGCAGAGAGCGAGACUUUUCUAUUUUCCAAAAGCUCGGUCUGAGGCCCCUCAGUCUUGCUUCCUAACCCGCGC	1.56156	7.77287	45.0255	1.94e-11	4.56e-10
hsa-mir-3184	MI0014226	Chr17	30117086	30117160	-	AAGCAAGACUGAGGGGCCUCAGACCGAGCUUUUGGAAAAUAGAAAAGUCUCGCUCUCUGCCCCUCAGCCUAACUU	#N/A	#N/A	#N/A	#N/A	#N/A
hsa-mir-4725	MI0017362	Chr17	31575269	31575358	+	GUGUCUCUCUGGAGACCCUGCAGCCUUCCCACCCACCAGGGAGCUUUCCAUGGGCUGUGGGGAAGGCGUCAGUGUCGGGUGAGGGAACAC	1.60588	-0.996821	6.63209	0.0100158	0.0217137
hsa-mir-365b	MI0000769	Chr17	31575411	31575521	+	AGAGUGUUCAAGGACAGCAAGAAAAAUGAGGGACUUUCAGGGGCAGCUGUGUUUUCUGACUCAGUCAUAAUGCCCCUAAAAAUCCUUAUUGUUCUUGCAGUGUGCAUCGGG	#N/A	#N/A	#N/A	#N/A	#N/A
hsa-mir-10226	MI0033056	Chr17	48032882	48032951	+	GAGGGAACUUCCAUGUGUCUGGGCUGGGAAACUGGAGUUCUCCACUGGGAGACAUUGAGUGUAUCCUUCU	#N/A	#N/A	#N/A	#N/A	#N/A
hsa-mir-152	MI0000462	Chr17	48037161	48037247	-	UGUCCCCCCCGGCCCAGGUUCUGUGAUACACUCCGACUCGGGCUCUGGAGCAGUCAGUGCAUGACAGAACUUGGGCCCGGAAGGACC	#N/A	#N/A	#N/A	#N/A	#N/A
hsa-mir-4736	MI0017373	Chr17	58335976	58336022	-	AGGCAGGUUAUCUGGGCUGCCAUCUCCCACUGGCUGCUUGCCUGCCU	#N/A	#N/A	#N/A	#N/A	#N/A
hsa-mir-142	MI0000458	Chr17	58331232	58331318	-	GACAGUGCAGUCACCCAUAAAGUAGAAAGCACUACUAACAGCACUGGAGGGUGUAGUGUUUCCUACUUUAUGGAUGAGUGUACUGUG	1.74654	10.6224	19.2075	1.17e-05	5.24e-05
hsa-mir-5047	MI0017932	Chr17	64501214	64501313	-	GAAGCGCUUGCCUAGACGAGACACAGUGCAUAAAAACAACUUUUGGGGGACAGGUAUGUUUUCUUGCAGCUGCGGUUGUAAGGUCUUGGCAAGACAAGCA	#N/A	#N/A	#N/A	#N/A	#N/A
hsa-mir-3064	MI0017375	Chr17	64500774	64500839	-	GGUCUGGCUGUUGUGGUGUGCAAAACUCCGUACAUUGCUAUUUUGCCACACUGCAACACCUUACAG	#N/A	#N/A	#N/A	#N/A	#N/A
hsa-mir-548d-2	MI0003671	Chr17	67471489	67471585	-	GAGAGGGAAGAUUUAGGUUGGUGCAAAAGUAAUUGUGGUUUUUGCCAUUGAAAGUAAUGGCAAAAACCACAGUUUCUUUUGCACCAACCUAAUAAAA	2.11743	-0.847775	15.5146	8.19e-05	0.000294605
hsa-mir-548aa-2	MI0016690	Chr17	67471489	67471585	+	UUUUAUUAGGUUGGUGCAAAAGAAACUGUGGUUUUUGCCAUUACUUUCAAUGGCAAAAACCACAAUUACUUUUGCACCAACCUAAAUCUUCCCUCUC	#N/A	#N/A	#N/A	#N/A	#N/A
hsa-mir-4524b	MI0019114	Chr17	69099542	69099656	+	UAGCUGGGUGGAUGUGUUCUUUUGAAGGAUAGCAGCAUAAGCCUGUCUCAAAAUAAUUCUGCAGUGAGACAGGUUCAUGCUGCUAUCGUUCCAAAGAGGAAGGGUAAUCACUGUC	#N/A	#N/A	#N/A	#N/A	#N/A
hsa-mir-4524a	MI0016891	Chr17	69099564	69099632	-	GAACGAUAGCAGCAUGAACCUGUCUCACUGCAGAAUUAUUUUGAGACAGGCUUAUGCUGCUAUCCUUCA	#N/A	#N/A	#N/A	#N/A	#N/A
hsa-mir-1-2	MI0000437	Chr18	21829004	21829088	-	ACCUACUCAGAGUACAUACUUCUUUAUGUACCCAUAUGAACAUACAAUGCUAUGGAAUGUAAAGAAGUAUGUAUUUUUGGUAGGC	-2.52928	4.90041	68.8515	1.06e-16	9.96e-15
hsa-mir-133a-1	MI0000450	Chr18	21825698	21825785	-	ACAAUGCUUUGCUAGAGCUGGUAAAAUGGAACCAAAUCGCCUCUUCAAUGGAUUUGGUCCCCUUCAACCAGCUGUAGCUAUGCAUUGA	-2.44829	4.4162	62.1086	3.25e-15	1.76e-13
hsa-mir-5583-1	MI0019139	Chr18	39676721	39676779	+	AAACUAAUAUACCCAUAUUCUGGCUAGGUGAUCAUCAGAAUAUGGGUAUAUUAGUUUGG	#N/A	#N/A	#N/A	#N/A	#N/A
hsa-mir-5583-2	MI0019140	Chr18	39676719	39676777	-	AAACUAAUAUACCCAUAUUCUGAUGAUCACCUAGCCAGAAUAUGGGUAUAUUAGUUUGG	#N/A	#N/A	#N/A	#N/A	#N/A
hsa-mir-122	MI0000442	Chr18	58451074	58451158	+	CCUUAGCAGAGCUGUGGAGUGUGACAAUGGUGUUUGUGUCUAAACUAUCAAACGCCAUUAUCACACUAAAUAGCUACUGCUAGGC	#N/A	#N/A	#N/A	#N/A	#N/A
hsa-mir-122b	MI0017383	Chr18	58451080	58451152	-	CAGUAGCUAUUUAGUGUGAUAAUGGCGUUUGAUAGUUUAGACACAAACACCAUUGUCACACUCCACAGCUCUG	#N/A	#N/A	#N/A	#N/A	#N/A
hsa-mir-4745	MI0017384	Chr19	804940	805001	+	GUGAGUGGGGCUCCCGGGACGGCGCCCGCCCUGGCCCUGGCCCGGCGACGUCUCACGGUCCC	2.58869	-0.51247	15.7417	7.26e-05	0.000263964
hsa-mir-3187	MI0014231	Chr19	813584	813653	+	GCUGGCCCUGGGCAGCGUGUGGCUGAAGGUCACCAUGUUCUCCUUGGCCAUGGGGCUGCGCGGGGCCAGC	2.1035	-0.0172255	14.8162	0.000118516	0.000411734
hsa-mir-6789	MI0022634	Chr19	2235829	2235926	-	CGAGGUAGGGGCGUCCCGGGCGCGCGGGCGGGUCCCAGGCUGGGCCCCUCGGAGGCCGGGUGCUCACUGCCCCGUCCCGGCGCCCGUGUCUCCUCCAG	1.24363	-1.26158	7.95632	0.00479198	0.011414
hsa-mir-1227	MI0006316	Chr19	2234062	2234149	-	GUGGGGCCAGGCGGUGGUGGGCACUGCUGGGGUGGGCACAGCAGCCAUGCAGAGCGGGCAUUUGACCCCGUGCCACCCUUUUCCCCAG	2.26522	-0.905407	14.6313	0.000130724	0.000448607
hsa-mir-6790	MI0022635	Chr19	6392921	6392983	-	GUGAGUGUGGAUUUGGCGGGGUUCGGGGGUUCCGACGGCGACCUCGGCGACCCCUCACUCACC	#N/A	#N/A	#N/A	#N/A	#N/A
hsa-mir-6885	MI0022732	Chr19	6389638	6389703	-	CCUGGAGGGGGGCACUGCGCAAGCAAAGCCAGGGACCCUGAGAGGCUUUGCUUCCUGCUCCCCUAG	2.10317	-0.946341	16.1816	5.76e-05	0.000213655
hsa-mir-181c	MI0000271	Chr19	13874699	13874808	+	CGGAAAAUUUGCCAAGGGUUUGGGGGAACAUUCAACCUGUCGGUGAGUUUGGGCAGCUCAGGCAAACCAUCGACCGUUGAGUGGACCCUGAGGCCUGGAAUUGCCAUCCU	1.81793	6.65565	37.125	1.11e-09	1.47e-08
hsa-mir-181d	MI0003139	Chr19	13874875	13875011	+	GUCCCCUCCCCUAGGCCACAGCCGAGGUCACAAUCAACAUUCAUUGUUGUCGGUGGGUUGUGAGGACUGAGGCCAGACCCACCGGGGGAUGAAUGUCACUGUGGCUGGGCCAGACACGGCUUAAGGGGAAUGGGGAC	1.65705	4.62853	25.3457	4.79e-07	3.2e-06
hsa-mir-642a	MI0003657	Chr19	45674928	45675024	+	AUCUGAGUUGGGAGGGUCCCUCUCCAAAUGUGUCUUGGGGUGGGGGAUCAAGACACAUUUGGAGAGGGAACCUCCCAACUCGGCCUCUGCCAUCAUU	2.10798	1.2245	21.6356	3.3e-06	1.69e-05
hsa-mir-642b	MI0016685	Chr19	45674932	45675008	-	GAGUUGGGAGGUUCCCUCUCCAAAUGUGUCUUGAUCCCCCACCCCAAGACACAUUUGGAGAGGGACCCUCCCAACUC	#N/A	#N/A	#N/A	#N/A	#N/A
hsa-mir-3190	MI0014235	Chr19	47226942	47227021	+	CUGGGGUCACCUGUCUGGCCAGCUACGUCCCCACGGCCCUUGUCAGUGUGGAAGGUAGACGGCCAGAGAGGUGACCCCGG	1.70689	-0.939224	12.8968	0.00032914	0.00104067
hsa-mir-3191	MI0014236	Chr19	47226944	47227019	-	GGGGUCACCUCUCUGGCCGUCUACCUUCCACACUGACAAGGGCCGUGGGGACGUAGCUGGCCAGACAGGUGACCCC	1.51384	-0.67692	11.5667	0.000671442	0.00200577
hsa-mir-10394	MI0033418	Chr19	58393364	58393446	+	UCUGCAGGUCCUGGUGAACGCCAUCAUCAACAGUGGUCCCCGGGAGGACUCCACACGCAUUGGGCGCGCCGGGACUGUGAGAC	#N/A	#N/A	#N/A	#N/A	#N/A
hsa-mir-4754	MI0017394	Chr19	58386770	58386858	-	ACGCGCCUGAUGCGGACCUGGGUUAGCGGAGUGAGGCCCAGUGGUCACCGCCGCCCUCCGCAGGUCCAGGUUGCCGUGCGCAUGUGCCU	2.13681	-0.787286	17.703	2.58e-05	0.000104703
hsa-mir-216a	MI0000292	Chr2	55988950	55989059	-	GAUGGCUGUGAGUUGGCUUAAUCUCAGCUGGCAACUGUGAGAUGUUCAUACAAUCCCUCACAGUGGUCUCUGGGAUUAUGCUAAACAGAGCAAUUUCCUAGCCCUCACGA	2.69583	1.03185	10.0105	0.00155649	0.00420343
hsa-mir-217	MI0000293	Chr2	55982967	55983076	-	AGUAUAAUUAUUACAUAGUUUUUGAUGUCGCAGAUACUGCAUCAGGAACUGAUUGGAUAAGAAUCAGUCACCAUCAGUUCCUAAUGCAUUGCCUUCAGCAUCUAAACAAG	2.4567	6.04598	12.8436	0.000338631	0.00106351
hsa-mir-4433a	MI0016773	Chr2	64340759	64340839	+	CAUCCUCCUUACGUCCCACCCCCCACUCCUGUUUCUGGUGAAAUAUUCAAACAGGAGUGGGGGUGGGACAUAAGGAGGAUA	#N/A	#N/A	#N/A	#N/A	#N/A
hsa-mir-4433b	MI0025511	Chr2	64340747	64340848	-	UGUGUUCCCUAUCCUCCUUAUGUCCCACCCCCACUCCUGUUUGAAUAUUUCACCAGAAACAGGAGUGGGGGGUGGGACGUAAGGAGGAUGGGGGAAAGAACA	#N/A	#N/A	#N/A	#N/A	#N/A
hsa-mir-4773-1	MI0017415	Chr2	151368334	151368411	+	UGCUCCCCAGCCUUUCUAUGCUCCUGUUCUGCUUUAUUUCAUCAAAGCAGAACAGGAGCAUAGAAAGGCUGGGGAGCA	#N/A	#N/A	#N/A	#N/A	#N/A
hsa-mir-4773-2	MI0017416	Chr2	151368334	151368411	-	UGCUCCCCAGCCUUUCUAUGCUCCUGUUCUGCUUUGAUGAAAUAAAGCAGAACAGGAGCAUAGAAAGGCUGGGGAGCA	#N/A	#N/A	#N/A	#N/A	#N/A
hsa-mir-1245a	MI0006380	Chr2	188978092	188978161	+	AUUUAUGUAUAGGCCUUUAGAUCAUCUGAUGUUGAAUACUCUUUAAGUGAUCUAAAGGCCUACAUAUAAA	#N/A	#N/A	#N/A	#N/A	#N/A
hsa-mir-1245b	MI0017431	Chr2	188978093	188978161	-	UUUAUAUGUAGGCCUUUAGAUCACUUAAAGAGUAUUCAACAUCAGAUGAUCUAAAGGCCUAUACAUAAA	#N/A	#N/A	#N/A	#N/A	#N/A
hsa-mir-3130-1	MI0014147	Chr2	206783234	206783308	-	CUUGUCAUGUCUUACCCAGUCUCCGGUGCAGCCUGUUGUCAAGGCUGCACCGGAGACUGGGUAAGACAUGACAAG	#N/A	#N/A	#N/A	#N/A	#N/A
hsa-mir-3130-2	MI0014148	Chr2	206783234	206783308	+	CUUGUCAUGUCUUACCCAGUCUCCGGUGCAGCCUUGACAACAGGCUGCACCGGAGACUGGGUAAGACAUGACAAG	#N/A	#N/A	#N/A	#N/A	#N/A
hsa-mir-4776-1	MI0017419	Chr2	212926257	212926336	+	CUAUAUGCAGUGGACCAGGAUGGCAAGGGCUCUCCUGAAAGGACAGUAGAGCCCUUGCCAUCCUGGUCCACUGCAUAUAG	#N/A	#N/A	#N/A	#N/A	#N/A
hsa-mir-4776-2	MI0017420	Chr2	212926257	212926336	-	CUAUAUGCAGUGGACCAGGAUGGCAAGGGCUCUACUGUCCUUUCAGGAGAGCCCUUGCCAUCCUGGUCCACUGCAUAUAG	#N/A	#N/A	#N/A	#N/A	#N/A
hsa-mir-103a-2	MI0000108	Chr20	3917494	3917571	+	UUGUGCUUUCAGCUUCUUUACAGUGCUGCCUUGUAGCAUUCAGGUCAAGCAGCAUUGUACAGGGCUAUGAAAGAACCA	1.10796	13.9079	29.6602	5.15e-08	4.8e-07
hsa-mir-103b-2	MI0007262	Chr20	3917502	3917563	-	UCAUAGCCCUGUACAAUGCUGCUUGACCUGAAUGCUACAAGGCAGCACUGUAAAGAAGCUGA	#N/A	#N/A	#N/A	#N/A	#N/A
hsa-mir-499a	MI0003183	Chr20	34990376	34990497	+	GCCCUGUCCCCUGUGCCUUGGGCGGGCGGCUGUUAAGACUUGCAGUGAUGUUUAACUCCUCUCCACGUGAACAUCACAGCAAGUCUGUGCUGCUUCCCGUCCCUACGCUGCCUGGGCAGGGU	2.55602	0.903595	6.99372	0.00817961	0.0184443
hsa-mir-499b	MI0017396	Chr20	34990400	34990472	-	GGAAGCAGCACAGACUUGCUGUGAUGUUCACGUGGAGAGGAGUUAAACAUCACUGCAAGUCUUAACAGCCGCC	#N/A	#N/A	#N/A	#N/A	#N/A
hsa-mir-298	MI0005523	Chr20	58818226	58818313	-	UCAGGUCUUCAGCAGAAGCAGGGAGGUUCUCCCAGUGGUUUUCCUUGACUGUGAGGAACUAGCCUGCUGCUUUGCUCAGGAGUGAGCU	#N/A	#N/A	#N/A	#N/A	#N/A
hsa-mir-296	MI0000747	Chr20	58817615	58817694	-	AGGACCCUUCCAGAGGGCCCCCCCUCAAUCCUGUUGUGCCUAAUUCAGAGGGUUGGGUGGAGGCUCUCCUGAAGGGCUCU	2.08295	3.04966	15.673	7.53e-05	0.000273035
hsa-mir-647	MI0003662	Chr20	63942631	63942726	-	AGGAAGUGUUGGCCUGUGGCUGCACUCACUUCCUUCAGCCCCAGGAAGCCUUGGUCGGGGGCAGGAGGGAGGGUCAGGCAGGGCUGGGGGCCUGAC	#N/A	#N/A	#N/A	#N/A	#N/A
hsa-mir-1914	MI0008335	Chr20	63941465	63941544	-	CGUGUGAGCCCGCCCUGUGCCCGGCCCACUUCUGCUUCCUCUUAGCGCAGGAGGGGUCCCGCACUGGGAGGGGCCCUCAC	2.25512	-0.867639	14.7552	0.00012241	0.000424214
hsa-mir-6724-2	MI0031516	Chr21	8249505	8249596	+	CGCUGCGCUUCUGGGCCCGCGGCGGGCGUGGGGCUGCCCGGGCCGGUCGACCAGCGCGCCGUAGCUCCCGAGGCCCGAGCCGCGACCCGCGG	#N/A	#N/A	#N/A	#N/A	#N/A
hsa-mir-10401	MI0033425	Chr21	8206563	8206618	+	CGUGUGGGAAGGCGUGGGGUGCGGACCCCGGCCCGACCUCGCCGUCCCGCCCGCCG	#N/A	#N/A	#N/A	#N/A	#N/A
hsa-mir-10401	MI0033425	Chr21	8250772	8250827	+	CGUGUGGGAAGGCGUGGGGUGCGGACCCCGGCCCGACCUCGCCGUCCCGCCCGCCG	#N/A	#N/A	#N/A	#N/A	#N/A
hsa-mir-10401	MI0033425	Chr21	8389610	8389665	+	CGUGUGGGAAGGCGUGGGGUGCGGACCCCGGCCCGACCUCGCCGUCCCGCCCGCCG	#N/A	#N/A	#N/A	#N/A	#N/A
hsa-mir-10401	MI0033425	Chr21	8433797	8433852	+	CGUGUGGGAAGGCGUGGGGUGCGGACCCCGGCCCGACCUCGCCGUCCCGCCCGCCG	#N/A	#N/A	#N/A	#N/A	#N/A
hsa-mir-6724-3	MI0031517	Chr21	8388362	8388453	+	CGCUGCGCUUCUGGGCCCGCGGCGGGCGUGGGGCUGCCCGGGCCGGUCGACCAGCGCGCCGUAGCUCCCGAGGCCCGAGCCGCGACCCGCGG	#N/A	#N/A	#N/A	#N/A	#N/A
hsa-mir-10401	MI0033425	Chr21	8206563	8206618	+	CGUGUGGGAAGGCGUGGGGUGCGGACCCCGGCCCGACCUCGCCGUCCCGCCCGCCG	#N/A	#N/A	#N/A	#N/A	#N/A
hsa-mir-10401	MI0033425	Chr21	8250772	8250827	+	CGUGUGGGAAGGCGUGGGGUGCGGACCCCGGCCCGACCUCGCCGUCCCGCCCGCCG	#N/A	#N/A	#N/A	#N/A	#N/A
hsa-mir-10401	MI0033425	Chr21	8389610	8389665	+	CGUGUGGGAAGGCGUGGGGUGCGGACCCCGGCCCGACCUCGCCGUCCCGCCCGCCG	#N/A	#N/A	#N/A	#N/A	#N/A
hsa-mir-10401	MI0033425	Chr21	8433797	8433852	+	CGUGUGGGAAGGCGUGGGGUGCGGACCCCGGCCCGACCUCGCCGUCCCGCCCGCCG	#N/A	#N/A	#N/A	#N/A	#N/A
hsa-mir-3648-2	MI0031512	Chr21	8986999	8987178	+	CGCGACUGCGGCGGCGGUGGUGGGGGGAGCCGCGGGGAUCGCCGAGGGCCGGUCGGCCGCCCCGGGUGCCGCGCGGUGCCGCCGGCGGCGGUGAGGCCCCGCGCGUGUGUCCCGGCUGCGGUCGGCCGCGCUCGAGGGGUCCCCGUGGCGUCCCCUUCCCCGCCGGCCGCCUUUCUCGCG	#N/A	#N/A	#N/A	#N/A	#N/A
hsa-mir-10396a	MI0033420	Chr21	8987617	8987665	+	GGCGGGGCUCGGAGCCGGGCUUCGGCCGGGCCCCGGGCCCUCGACCGGG	#N/A	#N/A	#N/A	#N/A	#N/A
hsa-mir-99a	MI0000101	Chr21	16539089	16539169	+	CCCAUUGGCAUAAACCCGUAGAUCCGAUCUUGUGGUGAAGUGGACCGCACAAGCUCGCUUCUAUGGGUCUGUGUCAGUGUG	-1.44962	8.095	20.7319	5.28e-06	2.54e-05
hsa-let-7c	MI0000064	Chr21	16539828	16539911	+	GCAUCCGGGUUGAGGUAGUAGGUUGUAUGGUUUAGAGUUACACCCUGGGAGUUAACUGUACAACCUUCUAGCUUUCCUUGGAGC	-1.49497	10.0223	23.4672	1.27e-06	7.48e-06
hsa-mir-3618	MI0016008	Chr22	20085746	20085833	+	UAAGCUGAGUGCAUUGUGAUUUCCAAUAAUUGAGGCAGUGGUUCUAAAAGCUGUCUACAUUAAUGAAAAGAGCAAUGUGGCCAGCUUG	2.47378	-0.83507	20.3429	6.47e-06	3.04e-05
hsa-mir-1306	MI0006443	Chr22	20086058	20086142	+	GUGAGCAGUCUCCACCACCUCCCCUGCAAACGUCCAGUGGUGCAGAGGUAAUGGACGUUGGCUCUGGUGGUGAUGGACAGUCCGA	2.16356	3.65124	41.8391	9.91e-11	1.83e-09
hsa-mir-301b	MI0005568	Chr22	21652981	21653058	+	GCCGCAGGUGCUCUGACGAGGUUGCACUACUGUGCUCUGAGAAGCAGUGCAAUGAUAUUGUCAAAGCAUCUGGGACCA	4.99949	2.52906	67.1949	2.46e-16	1.82e-14
hsa-mir-130b	MI0000748	Chr22	21653304	21653385	+	GGCCUGCCCGACACUCUUUCCCUGUUGCACUACUAUAGGCCGCUGGGAAGCAGUGCAAUGAUGAAAGGGCAUCGGUCAGGUC	3.35889	6.09088	71.9505	2.21e-17	2.66e-15
hsa-mir-3199-2	MI0014248	Chr22	27920526	27920611	+	GUGACUCCCAGGGACUGCCUUAGGAGAAAGUUUCUGGAAUGUCAGAACUUCCAGAAACUUUCUCCUAAGGCAGUCCCUGGAGUCAC	#N/A	#N/A	#N/A	#N/A	#N/A
hsa-mir-3199-1	MI0014247	Chr22	27920525	27920612	-	GGUGACUCCAGGGACUGCCUUAGGAGAAAGUUUCUGGAAGUUCUGACAUUCCAGAAACUUUCUCCUAAGGCAGUCCCUGGGAGUCACU	#N/A	#N/A	#N/A	#N/A	#N/A
hsa-mir-3909	MI0016413	Chr22	35335640	35335758	+	GGUAUGCUGUUGCGCUGUCCUUCCUCUGGGGAGCAGGCUCCGGGGGACAGGGAAAAGCACACAAGGAACUUGUCCUCUAGGGCCUGCAGUCUCAUGGGAGAGUGACAUGCACCAGGACC	1.18122	-0.20069	10.0597	0.00151546	0.00412429
hsa-mir-6069	MI0020346	Chr22	35336721	35336799	-	UGGUGACCCCUGGGCUAGGGCCUGCUGCCCCCUGCCCAGUGCAGGAGGGUGGAGGGUCACUCCUUAGGUGGUCCCAGUG	#N/A	#N/A	#N/A	#N/A	#N/A
hsa-mir-659	MI0003683	Chr22	37847678	37847774	-	UACCGACCCUCGAUUUGGUUCAGGACCUUCCCUGAACCAAGGAAGAGUCACAGUCUCUUCCUUGGUUCAGGGAGGGUCCCCAACAAUGUCCUCAUGG	1.46344	0.817215	24.0726	9.28e-07	5.75e-06
hsa-mir-658	MI0003682	Chr22	37844272	37844371	-	GCUCGGUUGCCGUGGUUGCGGGCCCUGCCCGCCCGCCAGCUCGCUGACAGCACGACUCAGGGCGGAGGGAAGUAGGUCCGUUGGUCGGUCGGGAACGAGG	2.28354	-0.636233	17.3427	3.12e-05	0.000123348
hsa-mir-191	MI0000465	Chr3	49020618	49020709	-	CGGCUGGACAGCGGGCAACGGAAUCCCAAAAGCAGCUGUUGUCUCCAGAGCAUUCCAGCUGCGCUUGGAUUUCGUCCCCUGCUCUCCUGCCU	2.11269	9.81265	49.5327	1.95e-12	5.6e-11
hsa-mir-425	MI0001448	Chr3	49020148	49020234	-	GAAAGCGCUUUGGAAUGACACGAUCACUCCCGUUGAGUGGGCACCCGAGAAGCCAUCGGGAAUGUCGUGUCCGCCCAGUGCUCUUUC	2.61642	8.91435	61.4125	4.63e-15	2.25e-13
hsa-mir-15b	MI0000438	Chr3	160404588	160404685	+	UUGAGGCCUUAAAGUACUGUAGCAGCACAUCAUGGUUUACAUGCUACAGUCAAGAUGCGAAUCAUUAUUUGCUGCUCUAGAAAUUUAAGGAAAUUCAU	1.49601	8.34495	38.1106	6.68e-10	9.8e-09
hsa-mir-16-2	MI0000115	Chr3	160404745	160404825	+	GUUCCACUCUAGCAGCACGUAAAUAUUGGCGUAGUGAAAUAUAUAUUAAACACCAAUAUUACUGUGCUGCUUUAGUGUGAC	1.52902	8.1624	44.0255	3.24e-11	6.91e-10
hsa-mir-4450	MI0016795	Chr4	76573568	76573632	+	UGUCUGGGGAUUUGGAGAAGUGGUGAGCGCAGGUCUUUGGCACCAUCUCCCCUGGUCCCUUGGCU	#N/A	#N/A	#N/A	#N/A	#N/A
hsa-mir-548ah	MI0016796	Chr4	76575551	76575626	+	AGGUUGGUGCAAAAGUGAUUGCAGUGUUUGCCAAUAAAAGUAAUGACAAAAACUGCAGUUACUUUUGCACCAGCCC	#N/A	#N/A	#N/A	#N/A	#N/A
hsa-mir-3688-2	MI0017447	Chr4	159128805	159128891	+	UCACUUUAAAGAGUGGCAAAGUCUUUCCAUAUGUGUAACAGACAUACAUACAUACAUAUGGAAAGACUUUGCCACUCUUGAAAGUGA	#N/A	#N/A	#N/A	#N/A	#N/A
hsa-mir-3688-1	MI0016089	Chr4	159128802	159128894	-	UCUUCACUUUCAAGAGUGGCAAAGUCUUUCCAUAUGUAUGUAUGUAUGUCUGUUACACAUAUGGAAAGACUUUGCCACUCUUUAAAGUGAAGA	#N/A	#N/A	#N/A	#N/A	#N/A
hsa-mir-143	MI0000459	Chr5	149428918	149429023	+	GCGCAGCGCCCUGUCUCCCAGCCUGAGGUGCAGUGCUGCAUCUCUGGUCAGUUGGGAGUCUGAGAUGAAGCACUGUAGCUCAGGAAGAGAGAAGUUGUUCUGCAGC	-2.12849	17.2337	81.6203	1.65e-19	4.64e-17
hsa-mir-145	MI0000461	Chr5	149430646	149430733	+	CACCUUGUCCUCACGGUCCAGUUUUCCCAGGAAUCCCUUAGAUGCUAAGAUGGGGAUUCCUGGAAAUACUGUUCUUGAGGUCAUGGUU	-1.25848	11.5215	22.9489	1.66e-06	9.4e-06
hsa-mir-103b-1	MI0007261	Chr5	168560904	168560965	+	UCAUAGCCCUGUACAAUGCUGCUUGAUCCAUAUGCAACAAGGCAGCACUGUAAAGAAGCCGA	#N/A	#N/A	#N/A	#N/A	#N/A
hsa-mir-103a-1	MI0000109	Chr5	168560896	168560973	-	UACUGCCCUCGGCUUCUUUACAGUGCUGCCUUGUUGCAUAUGGAUCAAGCAGCAUUGUACAGGGCUAUGAAGGCAUUG	1.10684	13.9063	29.4756	5.66e-08	5.21e-07
hsa-mir-5683	MI0019284	Chr6	6169334	6169409	+	GGAGCUUGUUACAGAUGCAGAUUCUCUGACUUCUUACUGCACCAGUGAAGUCAGGAUCUGCAUUUGAAUAAGACCC	-1.29856	1.9408	8.39816	0.00375601	0.00917484
hsa-mir-7853	MI0025523	Chr6	6169304	6169435	-	UCUCACACUUCAAUAGGCAUUGUCUGGGGUCUUAUUCAAAUGCAGAUCCUGACUUCACUGGUGCAGUAAGAAGUCAGAGAAUCUGCAUCUGUAACAAGCUCCCAGGUGAUGAUGGUGCUGCUGGUGUGCAGA	#N/A	#N/A	#N/A	#N/A	#N/A
hsa-mir-6833	MI0022678	Chr6	32179816	32179876	+	AAACGGUGUGGAAGAUGGGAGGAGAAAAAUCCCUGUUAACUUUCUCUCUCCACUUCCUCAG	#N/A	#N/A	#N/A	#N/A	#N/A
hsa-mir-6721	MI0022556	Chr6	32170030	32170116	-	CCCUCAUCUCUGGGCAGGGGCUUAUUGUAGGAGUCUCUGAAGAGAGCUGUGGACUGACCUGCUUUAACCCUUCCCCAGGUUCCCAUU	1.16222	-1.21133	5.77796	0.0162283	0.0331879
hsa-mir-6834	MI0022679	Chr6	33290245	33290325	+	GUGAGGGACUGGGAUUUGUGGGGCGAGGAGGGACCUGUACUAGCCAUGGUUCUGAUCACAUAUGUCCCAUCCCUCCAUCAG	#N/A	#N/A	#N/A	#N/A	#N/A
hsa-mir-6873	MI0022720	Chr6	33287227	33287289	-	CCCAGCAGAGGGAAUACAGAGGGCAAUCAGGACUGGGUCAUUCUCUCUGUCUUUCUCUCUCAG	#N/A	#N/A	#N/A	#N/A	#N/A
hsa-mir-206	MI0000490	Chr6	52144349	52144434	+	UGCUUCCCGAGGCCACAUGCUUCUUUAUAUCCCCAUAUGGAUUACUUUGCUAUGGAAUGUAAGGAAGUGUGUGGUUUCGGCAAGUG	#N/A	#N/A	#N/A	#N/A	#N/A
hsa-mir-133b	MI0000822	Chr6	52148923	52149041	+	CCUCAGAAGAAAGAUGCCCCCUGCUCUGGCUGGUCAAACGGAACCAAGUCCGUCUUCCUGAGAGGUUUGGUCCCCUUCAACCAGCUACAGCAGGGCUGGCAAUGCCCAGUCCUUGGAGA	-2.6396	2.77176	50.1256	1.44e-12	4.23e-11
hsa-mir-550a-1	MI0003600	Chr7	30289794	30289890	+	UGAUGCUUUGCUGGCUGGUGCAGUGCCUGAGGGAGUAAGAGCCCUGUUGUUGUAAGAUAGUGUCUUACUCCCUCAGGCACAUCUCCAACAAGUCUCU	2.46367	1.5745	45.5909	1.46e-11	3.6e-10
hsa-mir-550b-1	MI0016686	Chr7	30289794	30289890	-	AGAGACUUGUUGGAGAUGUGCCUGAGGGAGUAAGACACUAUCUUACAACAACAGGGCUCUUACUCCCUCAGGCACUGCACCAGCCAGCAAAGCAUCA	#N/A	#N/A	#N/A	#N/A	#N/A
hsa-mir-550a-2	MI0003601	Chr7	32732981	32733077	+	UGAUGCUUUGCUGGCUGGUGCAGUGCCUGAGGGAGUAAGAGCCCUGUUGUUGUCAGAUAGUGUCUUACUCCCUCAGGCACAUCUCCAGCGAGUCUCU	2.02285	1.56444	35.3134	2.81e-09	3.4e-08
hsa-mir-550b-2	MI0016687	Chr7	32732981	32733077	-	AGAGACUCGCUGGAGAUGUGCCUGAGGGAGUAAGACACUAUCUGACAACAACAGGGCUCUUACUCCCUCAGGCACUGCACCAGCCAGCAAAGCAUCA	1.36392	-1.24685	5.7244	0.0167307	0.0339684
hsa-mir-3914-2	MI0016421	Chr7	71307674	71307768	+	GAGUUCCUACUCAACUUCUCAUUUUCUGGUUCCUUCUACCAAGUUAAGCAUACUCAUUAGAAGGAACCAGAAAAUGAGAAGUUAAAUCUGAAGUC	#N/A	#N/A	#N/A	#N/A	#N/A
hsa-mir-3914-1	MI0016419	Chr7	71307672	71307770	-	UGGACUUCAGAUUUAACUUCUCAUUUUCUGGUUCCUUCUAAUGAGUAUGCUUAACUUGGUAGAAGGAACCAGAAAAUGAGAAGUUGAGUAGGAACUCUA	#N/A	#N/A	#N/A	#N/A	#N/A
hsa-mir-489	MI0003124	Chr7	93483936	93484019	-	GUGGCAGCUUGGUGGUCGUAUGUGUGACGCCAUUUACUUGAACCUUUAGGAGUGACAUCACAUAUACGGCAGCUAAACUGCUAC	3.4399	-0.574885	24.5149	7.37e-07	4.65e-06
hsa-mir-653	MI0003674	Chr7	93482760	93482855	-	UUCAUUCCUUCAGUGUUGAAACAAUCUCUACUGAACCAGCUUCAAACAAGUUCACUGGAGUUUGUUUCAAUAUUGCAAGAAUGAUAAGAUGGAAGC	2.33947	3.12823	24.8102	6.33e-07	4.08e-06
hsa-mir-5692a-1	MI0019297	Chr7	97963658	97963726	+	GACAGUACAAAUAAUACCACAGUGGGUGUACCUCAUGUGUGUACACCCUGUGAUAUUAUUUGUAAUAUC	#N/A	#N/A	#N/A	#N/A	#N/A
hsa-mir-5692c-2	MI0019289	Chr7	97964405	97964481	-	UGUGUACACCAACUGUGAUAUUAGGAGUCCUAUUUAUUUUUAGGAUAUUAGGAAUAAUAUCACAGUAGGUGUACACA	#N/A	#N/A	#N/A	#N/A	#N/A
hsa-mir-5090	MI0017979	Chr7	102465742	102465826	+	UCUGAGGUACCCGGGGCAGAUUGGUGUAGGGUGCAAAGCCUGCCCGCCCCCUAAGCCUUCUGCCCCCAACUCCAGCCUGUCAGGA	#N/A	#N/A	#N/A	#N/A	#N/A
hsa-mir-4467	MI0016818	Chr7	102471469	102471531	+	UGGUGGCGGCGGUAGUUAUGGGCUUCUCUUUCUCACCAGCAGCCCCUGGGCCGCCGCCUCCCU	#N/A	#N/A	#N/A	#N/A	#N/A
hsa-mir-29b-1	MI0000105	Chr7	130877459	130877539	-	CUUCAGGAAGCUGGUUUCAUAUGGUGGUUUAGAUUUAAAUAGUGAUUGUCUAGCACCAUUUGAAAUCAGUGUUCUUGGGGG	1.1805	8.64258	18.0649	2.13e-05	8.84e-05
hsa-mir-29a	MI0000087	Chr7	130876747	130876810	-	AUGACUGAUUUCUUUUGGUGUUCAGAGUCAAUAUAAUUUUCUAGCACCAUCUGAAAUCGGUUAU	#N/A	#N/A	#N/A	#N/A	#N/A
hsa-mir-4659a	MI0017287	Chr8	6745164	6745244	+	GAAACUGCUGAAGCUGCCAUGUCUAAGAAGAAAACUUUGGAGAAAAAUUUUCUUCUUAGACAUGGCAACGUCAACAGUUUC	1.84311	-1.14981	12.439	0.000420457	0.00130881
hsa-mir-4659b	MI0017291	Chr8	6745168	6745240	-	CUGUUGACGUUGCCAUGUCUAAGAAGAAAAUUUUUCUCCAAAGUUUUCUUCUUAGACAUGGCAGCUUCAGCAG	#N/A	#N/A	#N/A	#N/A	#N/A
hsa-mir-3622a	MI0016013	Chr8	27701677	27701759	+	AAUAGAGGGUGCACAGGCACGGGAGCUCAGGUGAGGCAGGGAGCUGAGCUCACCUGACCUCCCAUGCCUGUGCACCCUCUAUU	#N/A	#N/A	#N/A	#N/A	#N/A
hsa-mir-3622b	MI0016014	Chr8	27701673	27701767	-	AGUGAUAUAAUAGAGGGUGCACAGGCAUGGGAGGUCAGGUGAGCUCAGCUCCCUGCCUCACCUGAGCUCCCGUGCCUGUGCACCCUCUAUUGGCU	#N/A	#N/A	#N/A	#N/A	#N/A
hsa-mir-486-2	MI0023622	Chr8	41660444	41660507	+	UCCUGUACUGAGCUGCCCCGAGCUGGGCAGCAUGAAGGGCCUCGGGGCAGCUCAGUACAGGAUG	#N/A	#N/A	#N/A	#N/A	#N/A
hsa-mir-486-1	MI0002470	Chr8	41660441	41660508	-	GCAUCCUGUACUGAGCUGCCCCGAGGCCCUUCAUGCUGCCCAGCUCGGGGCAGCUCAGUACAGGAUAC	#N/A	#N/A	#N/A	#N/A	#N/A
hsa-mir-5681a	MI0019281	Chr8	74548543	74548617	+	AGUUUUUGAAGAGUAUUGCCACCCUUUCUAGUCCCUAUUAGACUAGAAAGGGUGGCAAUACCUCUUCCAAAAACU	#N/A	#N/A	#N/A	#N/A	#N/A
hsa-mir-5681b	MI0019293	Chr8	74548550	74548609	-	GAAGAGGUAUUGCCACCCUUUCUAGUCUAAUAGGGACUAGAAAGGGUGGCAAUACUCUUC	#N/A	#N/A	#N/A	#N/A	#N/A
hsa-mir-3150a	MI0014177	Chr8	95072914	95072993	+	GGGAAGCAGGCCAACCUCGACGAUCUCCUCAGCACCUGAACGCCAAGGCUGGGGAGAUCCUCGAGGUUGGCCUGCUUUCC	1.48676	-0.982251	9.43182	0.00213253	0.00553592
hsa-mir-3150b	MI0016426	Chr8	95072911	95072996	-	GAGGGAAAGCAGGCCAACCUCGAGGAUCUCCCCAGCCUUGGCGUUCAGGUGCUGAGGAGAUCGUCGAGGUUGGCCUGCUUCCCCUC	#N/A	#N/A	#N/A	#N/A	#N/A
hsa-mir-875	MI0005541	Chr8	99536786	99536861	-	UUAGUGGUACUAUACCUCAGUUUUAUCAGGUGUUCUUAAAAUCACCUGGAAACACUGAGGUUGUGUCUCACUGAAC	#N/A	#N/A	#N/A	#N/A	#N/A
hsa-mir-599	MI0003611	Chr8	99536636	99536730	-	AAAGACAUGCUGUCCACAGUGUGUUUGAUAAGCUGACAUGGGACAGGGAUUCUUUUCACUGUUGUGUCAGUUUAUCAAACCCAUACUUGGAUGAC	#N/A	#N/A	#N/A	#N/A	#N/A
hsa-mir-548d-1	MI0003668	Chr8	123348034	123348130	-	AAACAAGUUAUAUUAGGUUGGUGCAAAAGUAAUUGUGGUUUUUGCCUGUAAAAGUAAUGGCAAAAACCACAGUUUCUUUUGCACCAGACUAAUAAAG	2.85137	-0.780292	25.6894	4.01e-07	2.88e-06
hsa-mir-548aa-1	MI0016689	Chr8	123348034	123348130	+	CUUUAUUAGUCUGGUGCAAAAGAAACUGUGGUUUUUGCCAUUACUUUUACAGGCAAAAACCACAAUUACUUUUGCACCAACCUAAUAUAACUUGUUU	#N/A	#N/A	#N/A	#N/A	#N/A
hsa-mir-4662a	MI0017290	Chr8	124821985	124822051	+	UCUAUUUAGCCAAUUGUCCAUCUUUAGCUAUUCUGAAUGCCUAAAGAUAGACAAUUGGCUAAAUAGA	1.86718	5.21287	24.8426	6.22e-07	4.03e-06
hsa-mir-4662b	MI0017293	Chr8	124821978	124822058	-	CACAAUUUCUAUUUAGCCAAUUGUCUAUCUUUAGGCAUUCAGAAUAGCUAAAGAUGGACAAUUGGCUAAAUAGACACUGUG	#N/A	#N/A	#N/A	#N/A	#N/A
hsa-mir-30d	MI0000255	Chr8	134804876	134804945	-	GUUGUUGUAAACAUCCCCGACUGGAAGCUGUAAGACACAGCUAAGCUUUCAGUCAGAUGUUUGCUGCUAC	#N/A	#N/A	#N/A	#N/A	#N/A
hsa-mir-30b	MI0000441	Chr8	134800520	134800607	-	ACCAAGUUUCAGUUCAUGUAAACAUCCUACACUCAGCUGUAAUACAUGGAUUGGCUGGGAGGUGGAUGUUUACUUCAGCUGACUUGGA	#N/A	#N/A	#N/A	#N/A	#N/A
hsa-mir-4477a	MI0016829	Chr9	41233755	41233835	+	UCCUCCUCCCAUCAAUCACAAAUGUCCUUAAUGGCAUUUAAGGAUUGCUAUUAAGGACAUUUGUGAUUCACGGGAGGAGGU	#N/A	#N/A	#N/A	#N/A	#N/A
hsa-mir-4477b	MI0016830	Chr9	41233755	41233835	+	ACCUCCUCCCGUGAAUCACAAAUGUCCUUAAUAGCAAUCCUUAAAUGCCAUUAAGGACAUUUGUGAUUGAUGGGAGGAGGA	#N/A	#N/A	#N/A	#N/A	#N/A
hsa-mir-4477a	MI0016829	Chr9	41233755	41233835	-	UCCUCCUCCCAUCAAUCACAAAUGUCCUUAAUGGCAUUUAAGGAUUGCUAUUAAGGACAUUUGUGAUUCACGGGAGGAGGU	#N/A	#N/A	#N/A	#N/A	#N/A
hsa-mir-4477b	MI0016830	Chr9	41233755	41233835	-	ACCUCCUCCCGUGAAUCACAAAUGUCCUUAAUAGCAAUCCUUAAAUGCCAUUAAGGACAUUUGUGAUUGAUGGGAGGAGGA	#N/A	#N/A	#N/A	#N/A	#N/A
hsa-mir-3910-1	MI0016414	Chr9	91636251	91636361	+	CUUUUGCUGUCAGUUUUUCUGUUGCUUGUCUUGGUUUUAUGCCUUUUAUAUCAAGGCACAUAAAAGGCAUAAAACCAAGACAAGCAACAAAAAAAGGAUUGAUCACAGAAG	1.42416	-1.23307	10.3007	0.00132976	0.00364004
hsa-mir-3910-2	MI0016431	Chr9	91636264	91636345	-	UUUUUUUGUUGCUUGUCUUGGUUUUAUGCCUUUUAUGUGCCUUGAUAUAAAAGGCAUAAAACCAAGACAAGCAACAGAAAAA	#N/A	#N/A	#N/A	#N/A	#N/A
hsa-mir-181a-2	MI0000269	Chr9	124692442	124692551	+	AGAAGGGCUAUCAGGCCAGCCUUCAGAGGACUCCAAGGAACAUUCAACGCUGUCGGUGAGUUUGGGAUUUGAAAAAACCACUGACCGUUGACUGUACCUUGGGGUCCUUA	1.47922	10.787	31.4654	2.03e-08	2.03e-07
hsa-mir-181b-2	MI0000683	Chr9	124693710	124693798	+	CUGAUGGCUGCACUCAACAUUCAUUGCUGUCGGUGGGUUUGAGUCUGAAUCAACUCACUGAUCAAUGAAUGCAAACUGCGGACCAAACA	1.81405	7.60274	38.211	6.35e-10	9.4e-09
hsa-mir-3960	MI0016964	Chr9	127785833	127785923	+	GGCGCCCCGGCUCCCCGCGCCCCCGAUCGGGGCCGCCGCUAGUAGUGGCGGCGGCGGAGGCGGGGGCAGCGGCGGCGGCGGCGGAGGCGCC	#N/A	#N/A	#N/A	#N/A	#N/A
hsa-mir-2861	MI0013006	Chr9	127785918	127786007	+	GGCGCCUCUGCAGCUCCGGCUCCCCCUGGCCUCUCGGGAACUACAAGUCCCAGGGGGCCUGGCGGUGGGCGGCGGGCGGAAGAGGCGGGG	#N/A	#N/A	#N/A	#N/A	#N/A
hsa-mir-3154	MI0014182	Chr9	128244947	128245030	-	GGCCCCUCCUUCUCAGCCCCAGCUCCCGCUCACCCCUGCCACGUCAAAGGAGGCAGAAGGGGAGUUGGGAGCAGAGAGGGGACC	-1.12286	-1.04491	5.95134	0.0147061	0.0306995
hsa-mir-199b	MI0000282	Chr9	128244721	128244830	-	CCAGAGGACACCUCCACUCCGUCUACCCAGUGUUUAGACUAUCUGUUCAGGACUCCCAAAUUGUACAGUAGUCUGCACAUUGGUUAGGCUGGGCUGGGUUAGACCCUCGG	#N/A	#N/A	#N/A	#N/A	#N/A
hsa-mir-219b	MI0017299	Chr9	128392621	128392708	+	GGAGCUCAGCCACAGAUGUCCAGCCACAAUUCUCGGUUGGCCGCAGACUCGUACAAGAAUUGCGUUUGGACAAUCAGUGGCGAAGCCC	1.75641	0.09355	21.3529	3.82e-06	1.91e-05
hsa-mir-219a-2	MI0000740	Chr9	128392618	128392714	-	ACUCAGGGGCUUCGCCACUGAUUGUCCAAACGCAAUUCUUGUACGAGUCUGCGGCCAACCGAGAAUUGUGGCUGGACAUCUGUGGCUGAGCUCCGGG	1.59336	-0.952229	5.28722	0.0214825	0.0414053
hsa-mir-222	MI0000299	ChrX	45747015	45747124	-	GCUGCUGGAAGGUGUAGGUACCCUCAAUGGCUCAGUAGCCAGUGUAGAUCCUGUCUUUCGUAAUCAGCAGCUACAUCUGGCUACUGGGUCUCUGAUGGCAUCUUCUAGCU	#N/A	#N/A	#N/A	#N/A	#N/A
hsa-mir-221	MI0000298	ChrX	45746157	45746266	-	UGAACAUCCAGGUCUGGGGCAUGAACCUGGCAUACAAUGUAGAUUUCUGUGUUCGUUAGGCAACAGCUACAUUGUCUGCUGGGUUUCAGGCUACCUGGAAACAUGUUCUC	#N/A	#N/A	#N/A	#N/A	#N/A
hsa-mir-6894	MI0022741	ChrX	53198889	53198945	-	CAAGAAGGAGGAUGGAGAGCUGGGCCAGACAUGCUCUUGCCUGCCCUCUUCCUCCAG	1.85932	-0.953142	14.5373	0.000137409	0.000468123
hsa-mir-6895	MI0022742	ChrX	53195411	53195488	-	CAGCUCAGGGCCAGGCACAGAGUAAGCAUCAAUAGCAUUGGCAAGUUGAACUGAGCUGUCUCUCGCCCUUGGCCUUAG	1.85882	-0.976185	10.117	0.00146905	0.0040135
hsa-let-7f-2	MI0000068	ChrX	53557192	53557274	-	UGUGGGAUGAGGUAGUAGAUUGUAUAGUUUUAGGGUCAUACCCCAUCUUGGAGAUAACUAUACAGUCUACUGUCUUUCCCACG	#N/A	#N/A	#N/A	#N/A	#N/A
hsa-mir-98	MI0000100	ChrX	53556223	53556341	-	AGGAUUCUGCUCAUGCCAGGGUGAGGUAGUAAGUUGUAUUGUUGUGGGGUAGGGAUAUUAGGCCCCAAUUAGAAGAUAACUAUACAACUUACUACUUUCCCUGGUGUGUGGCAUAUUCA	1.17224	6.37346	29.8597	4.64e-08	4.36e-07
hsa-mir-4536-1	MI0016906	ChrX	55451495	55451582	-	AUGUGGUAGAUAUAUGCACGAUAUAUAUACUGCCCUGCUUUUAUACAUACAUACAUACAUACCUAUAUCGUGCAUAUAUCUACCACAU	#N/A	#N/A	#N/A	#N/A	#N/A
hsa-mir-4536-2	MI0019149	ChrX	55451495	55451582	+	AUGUGGUAGAUAUAUGCACGAUAUAGGUAUGUAUGUAUGUAUGUAUAAAAGCAGGGCAGUAUAUAUAUCGUGCAUAUAUCUACCACAU	#N/A	#N/A	#N/A	#N/A	#N/A
hsa-mir-374a	MI0000782	ChrX	74287286	74287357	-	UACAUCGGCCAUUAUAAUACAACCUGAUAAGUGUUAUAGCACUUAUCAGAUUGUAUUGUAAUUGUCUGUGUA	#N/A	#N/A	#N/A	#N/A	#N/A
hsa-mir-545	MI0003516	ChrX	74287104	74287209	-	CCCAGCCUGGCACAUUAGUAGGCCUCAGUAAAUGUUUAUUAGAUGAAUAAAUGAAUGACUCAUCAGCAAACAUUUAUUGUGUGCCUGCUAAAGUGAGCUCCACAGG	2.24484	-0.00849505	28.4588	9.57e-08	8.21e-07
hsa-mir-1912	MI0008333	ChrX	114651544	114651623	+	CUCUAGGAUGUGCUCAUUGCAUGGGCUGUGUAUAGUAUUAUUCAAUACCCAGAGCAUGCAGUGUGAACAUAAUAGAGAUU	-4.36063	-1.12041	53.3995	2.72e-13	8.91e-12
hsa-mir-1264	MI0003758	ChrX	114652655	114652723	+	AGGUCCUCAAUAAGUAUUUGUUGAAAGAAUAAAUAAACCAACAAGUCUUAUUUGAGCACCUGUUAUGUG	-1.35741	-1.33535	6.86551	0.00878753	0.0195325
hsa-mir-513b	MI0006648	ChrX	147199044	147199127	-	GUGUACAGUGCCUUUCACAAGGAGGUGUCAUUUAUGUGAACUAAAAUAUAAAUGUCACCUUUUUGAGAGGAGUAAUGUACAGCA	#N/A	#N/A	#N/A	#N/A	#N/A
hsa-mir-513c	MI0006649	ChrX	147189704	147189787	-	GCGUACAGUGCCUUUCUCAAGGAGGUGUCGUUUAUGUGAACUAAAAUAUAAAUUUCACCUUUCUGAGAAGAGUAAUGUACAGCA	3.21986	-0.654843	8.61287	0.00333796	0.00828335
hsa-mir-452	MI0001733	ChrX	151959628	151959712	-	GCUAAGCACUUACAACUGUUUGCAGAGGAAACUGAGACUUUGUAACUAUGUCUCAGUCUCAUCUGCAAAGAAGUAAGUGCUUUGC	1.94793	7.77157	18.6487	1.57e-05	6.89e-05
hsa-mir-224	MI0000301	ChrX	151958578	151958658	-	GGGCUUUCAAGUCACUAGUGGUUCCGUUUAGUAGAUGAUUGUGCAUUGUUUCAAAAUGGUGCCCUAGUGACUACAAAGCCC	3.27342	7.34411	31.8004	1.71e-08	1.73e-07
hsa-mir-3202-1	MI0014252	ChrX	153981097	153981177	+	UAUUAAUAUGGAAGGGAGAAGAGCUUUAAUGAUUGGAGUCAUUUUCAGAGCAUUAAAGCUCUUCUCCCUUCCAUAUUAAUG	#N/A	#N/A	#N/A	#N/A	#N/A
hsa-mir-3202-2	MI0014253	ChrX	153981098	153981176	-	AUUAAUAUGGAAGGGAGAAGAGCUUUAAUGCUCUGAAAAUGACUCCAAUCAUUAAAGCUCUUCUCCCUUCCAUAUUAAU	#N/A	#N/A	#N/A	#N/A	#N/A

## Sheet: BRCA
ID	Accession	Chromosome	Start	End	Strand	Sequence	logFC	logCPM	LR	PValue	FDR
hsa-mir-512-1	MI0003140	Chr19	53666679	53666762	+	UCUCAGUCUGUGGCACUCAGCCUUGAGGGCACUUUCUGGUGCCAGAAUGAAAGUGCUGUCAUAGCUGAGGUCCAAUGACUGAGG	1.42306	0.49507	11.5958	0.00066101	0.00159782
hsa-mir-512-2	MI0003141	Chr19	53669157	53669254	+	GGUACUUCUCAGUCUGUGGCACUCAGCCUUGAGGGCACUUUCUGGUGCCAGAAUGAAAGUGCUGUCAUAGCUGAGGUCCAAUGACUGAGGCGAGCACC	1.75496	0.474786	17.4519	2.94674e-05	8.90372e-05
hsa-mir-520d	MI0003164	Chr19	53720096	53720182	+	UCUCAAGCUGUGAGUCUACAAAGGGAAGCCCUUUCUGUUGUCUAAAAGAAAAGAAAGUGCUUCUCUUUGGUGGGUUACGGUUUGAGA	#N/A	#N/A	#N/A	#N/A	#N/A
hsa-mir-516b-2	MI0003167	Chr19	53725442	53725526	+	UCUCAUGAUGUGACCAUCUGGAGGUAAGAAGCACUUUGUGUUUUGUGAAAGAAAGUGCUUCCUUUCAGAGGGUUACUCUUUGAGA	#N/A	#N/A	#N/A	#N/A	#N/A
hsa-mir-526a-2	MI0003168	Chr19	53726922	53726986	+	GUGACCCUCUAGAGGGAAGCACUUUCUGUUGAAAGAAAAGAACAUGCAUCCUUUCAGAGGGUUAC	#N/A	#N/A	#N/A	#N/A	#N/A
hsa-mir-518a-1	MI0003170	Chr19	53731006	53731090	+	UCUCAAGCUGUGACUGCAAAGGGAAGCCCUUUCUGUUGUCUGAAAGAAGAGAAAGCGCUUCCCUUUGCUGGAUUACGGUUUGAGA	#N/A	#N/A	#N/A	#N/A	#N/A
hsa-mir-518d	MI0003171	Chr19	53734877	53734963	+	UCCCAUGCUGUGACCCUCUAGAGGGAAGCACUUUCUGUUGUCUGAAAGAAACCAAAGCGCUUCCCUUUGGAGCGUUACGGUUUGAGA	#N/A	#N/A	#N/A	#N/A	#N/A
hsa-mir-516b-1	MI0003172	Chr19	53736845	53736934	+	UCUCAGGCUGUGACCAUCUGGAGGUAAGAAGCACUUUCUGUUUUGUGAAAGAAAAGAAAGUGCUUCCUUUCAGAGGGUUACUCUUUGAGA	#N/A	#N/A	#N/A	#N/A	#N/A
hsa-mir-518a-2	MI0003173	Chr19	53739333	53739419	+	UCUCAAGCUGUGGGUCUGCAAAGGGAAGCCCUUUCUGUUGUCUAAAAGAAGAGAAAGCGCUUCCCUUUGCUGGAUUACGGUUUGAGA	1.35097	-0.149475	6.51734	0.0106828	0.0203772
hsa-mir-521-1	MI0003176	Chr19	53748636	53748722	+	UCUCAGGCUGUGACCCUCCAAAGGGAAGAACUUUCUGUUGUCUAAAAGAAAAGAACGCACUUCCCUUUAGAGUGUUACCGUGUGAGA	2.17683	-0.417844	10.2842	0.00134172	0.00305868
hsa-mir-517a	MI0003161	Chr19	53712268	53712354	+	UCUCAGGCAGUGACCCUCUAGAUGGAAGCACUGUCUGUUGUAUAAAAGAAAAGAUCGUGCAUCCCUUUAGAGUGUUACUGUUUGAGA	#N/A	#N/A	#N/A	#N/A	#N/A
hsa-mir-517b	MI0003165	Chr19	53721076	53721142	+	GUGACCCUCUAGAUGGAAGCACUGUCUGUUGUCUAAGAAAAGAUCGUGCAUCCCUUUAGAGUGUUAC	#N/A	#N/A	#N/A	#N/A	#N/A
hsa-mir-526b	MI0003150	Chr19	53694393	53694475	+	UCAGGCUGUGACCCUCUUGAGGGAAGCACUUUCUGUUGUCUGAAAGAAGAGAAAGUGCUUCCUUUUAGAGGCUUACUGUCUGA	#N/A	#N/A	#N/A	#N/A	#N/A
hsa-mir-517c	MI0003174	Chr19	53741313	53741407	+	GAAGAUCUCAGGCAGUGACCCUCUAGAUGGAAGCACUGUCUGUUGUCUAAGAAAAGAUCGUGCAUCCUUUUAGAGUGUUACUGUUUGAGAAAAUC	#N/A	#N/A	#N/A	#N/A	#N/A
hsa-mir-524	MI0003160	Chr19	53711002	53711088	+	UCUCAUGCUGUGACCCUACAAAGGGAAGCACUUUCUCUUGUCCAAAGGAAAAGAAGGCGCUUCCCUUUGGAGUGUUACGGUUUGAGA	#N/A	#N/A	#N/A	#N/A	#N/A
hsa-mir-518e	MI0003169	Chr19	53729838	53729925	+	UCUCAGGCUGUGACCCUCUAGAGGGAAGCGCUUUCUGUUGGCUAAAAGAAAAGAAAGCGCUUCCCUUCAGAGUGUUAACGCUUUGAGA	1.44572	0.161386	7.97793	0.0047351	0.00979147
hsa-mir-519d	MI0003162	Chr19	53713347	53713434	+	UCCCAUGCUGUGACCCUCCAAAGGGAAGCGCUUUCUGUUUGUUUUCUCUUAAACAAAGUGCCUCCCUUUAGAGUGUUACCGUUUGGGA	#N/A	#N/A	#N/A	#N/A	#N/A
hsa-mir-523	MI0003153	Chr19	53698385	53698471	+	UCUCAUGCUGUGACCCUCUAGAGGGAAGCGCUUUCUGUUGUCUGAAAGAAAAGAACGCGCUUCCCUAUAGAGGGUUACCCUUUGAGA	#N/A	#N/A	#N/A	#N/A	#N/A
hsa-mir-520f	MI0003146	Chr19	53682159	53682245	+	UCUCAGGCUGUGACCCUCUAAAGGGAAGCGCUUUCUGUGGUCAGAAAGAAAAGCAAGUGCUUCCUUUUAGAGGGUUACCGUUUGGGA	1.43815	-0.146767	7.72038	0.00546009	0.0111265
hsa-mir-520a	MI0003149	Chr19	53690881	53690965	+	CUCAGGCUGUGACCCUCCAGAGGGAAGUACUUUCUGUUGUCUGAGAGAAAAGAAAGUGCUUCCCUUUGGACUGUUUCGGUUUGAG	#N/A	#N/A	#N/A	#N/A	#N/A
hsa-mir-518c	MI0003159	Chr19	53708735	53708835	+	GCGAGAAGAUCUCAUGCUGUGACUCUCUGGAGGGAAGCACUUUCUGUUGUCUGAAAGAAAACAAAGCGCUUCUCUUUAGAGUGUUACGGUUUGAGAAAAGC	#N/A	#N/A	#N/A	#N/A	#N/A
hsa-mir-520c	MI0003158	Chr19	53707453	53707539	+	UCUCAGGCUGUCGUCCUCUAGAGGGAAGCACUUUCUGUUGUCUGAAAGAAAAGAAAGUGCUUCCUUUUAGAGGGUUACCGUUUGAGA	#N/A	#N/A	#N/A	#N/A	#N/A
hsa-mir-518f	MI0003154	Chr19	53700015	53700101	+	UCUCAUGCUGUGACCCUCUAGAGGGAAGCACUUUCUCUUGUCUAAAAGAAAAGAAAGCGCUUCUCUUUAGAGGAUUACUCUUUGAGA	#N/A	#N/A	#N/A	#N/A	#N/A
hsa-mir-518b	MI0003156	Chr19	53702737	53702819	+	UCAUGCUGUGGCCCUCCAGAGGGAAGCGCUUUCUGUUGUCUGAAAGAAAACAAAGCGCUCCCCUUUAGAGGUUUACGGUUUGA	#N/A	#N/A	#N/A	#N/A	#N/A
hsa-mir-515-1	MI0003144	Chr19	53679003	53679085	+	UCUCAUGCAGUCAUUCUCCAAAAGAAAGCACUUUCUGUUGUCUGAAAGCAGAGUGCCUUCUUUUGGAGCGUUACUGUUUGAGA	#N/A	#N/A	#N/A	#N/A	#N/A
hsa-mir-515-2	MI0003147	Chr19	53685009	53685091	+	UCUCAUGCAGUCAUUCUCCAAAAGAAAGCACUUUCUGUUGUCUGAAAGCAGAGUGCCUUCUUUUGGAGCGUUACUGUUUGAGA	#N/A	#N/A	#N/A	#N/A	#N/A
hsa-mir-1323	MI0003786	Chr19	53671968	53672040	+	ACUGAGGUCCUCAAAACUGAGGGGCAUUUUCUGUGGUUUGAAAGGAAAGUGCACCCAGUUUUGGGGAUGUCAA	#N/A	#N/A	#N/A	#N/A	#N/A
hsa-mir-525	MI0003152	Chr19	53697533	53697617	+	CUCAAGCUGUGACUCUCCAGAGGGAUGCACUUUCUCUUAUGUGAAAAAAAAGAAGGCGCUUCCCUUUAGAGCGUUACGGUUUGGG	1.0523	0.234683	5.36779	0.0205119	0.0366807
hsa-mir-519b	MI0003151	Chr19	53695213	53695293	+	CAUGCUGUGACCCUCUAGAGGGAAGCGCUUUCUGUUGUCUGAAAGAAAAGAAAGUGCAUCCUUUUAGAGGUUUACUGUUUG	#N/A	#N/A	#N/A	#N/A	#N/A
hsa-mir-522	MI0003177	Chr19	53751211	53751297	+	UCUCAGGCUGUGUCCCUCUAGAGGGAAGCGCUUUCUGUUGUCUGAAAGAAAAGAAAAUGGUUCCCUUUAGAGUGUUACGCUUUGAGA	3.89869	1.24982	30.4752	3.38169e-08	1.44989e-07
hsa-mir-519a-2	MI0003182	Chr19	53762344	53762430	+	UCUCAGGCUGUGUCCCUCUACAGGGAAGCGCUUUCUGUUGUCUGAAAGAAAGGAAAGUGCAUCCUUUUAGAGUGUUACUGUUUGAGA	2.65214	1.36281	24.9146	5.99283e-07	2.19372e-06
hsa-mir-520b	MI0003155	Chr19	53701227	53701287	+	CCCUCUACAGGGAAGCGCUUUCUGUUGUCUGAAAGAAAAGAAAGUGCUUCCUUUUAGAGGG	1.35364	0.399917	9.77021	0.00177362	0.00394076
hsa-mir-519e	MI0003145	Chr19	53679940	53680023	+	UCUCAUGCAGUCAUUCUCCAAAAGGGAGCACUUUCUGUUUGAAAGAAAACAAAGUGCCUCCUUUUAGAGUGUUACUGUUUGAGA	#N/A	#N/A	#N/A	#N/A	#N/A
hsa-mir-519a-1	MI0003178	Chr19	53752397	53752481	+	CUCAGGCUGUGACACUCUAGAGGGAAGCGCUUUCUGUUGUCUGAAAGAAAGGAAAGUGCAUCCUUUUAGAGUGUUACUGUUUGAG	3.513	3.0459	42.0968	8.68637e-11	4.73863e-10
hsa-mir-521-2	MI0003163	Chr19	53716594	53716680	+	UCUCGGGCUGUGACUCUCCAAAGGGAAGAAUUUUCUCUUGUCUAAAAGAAAAGAACGCACUUCCCUUUAGAGUGUUACCGUGUGAGA	1.43487	-0.629606	5.96857	0.0145631	0.0270609
hsa-mir-519c	MI0003148	Chr19	53686469	53686555	+	UCUCAGCCUGUGACCCUCUAGAGGGAAGCGCUUUCUGUUGUCUGAAAGAAAAGAAAGUGCAUCUUUUUAGAGGAUUACAGUUUGAGA	1.28625	-0.328737	6.55182	0.0104777	0.0200679
hsa-mir-520g	MI0003166	Chr19	53722166	53722255	+	UCCCAUGCUGUGACCCUCUAGAGGAAGCACUUUCUGUUUGUUGUCUGAGAAAAAACAAAGUGCUUCCCUUUAGAGUGUUACCGUUUGGGA	#N/A	#N/A	#N/A	#N/A	#N/A
hsa-mir-520h	MI0003175	Chr19	53742512	53742599	+	UCCCAUGCUGUGACCCUCUAGAGGAAGCACUUUCUGUUUGUUGUCUGAGAAAAAACAAAGUGCUUCCCUUUAGAGUUACUGUUUGGGA	#N/A	#N/A	#N/A	#N/A	#N/A
hsa-mir-526a-1	MI0003157	Chr19	53706252	53706336	+	CUCAGGCUGUGACCCUCUAGAGGGAAGCACUUUCUGUUGCUUGAAAGAAGAGAAAGCGCUUCCUUUUAGAGGAUUACUCUUUGAG	#N/A	#N/A	#N/A	#N/A	#N/A
hsa-mir-527	MI0003179	Chr19	53754018	53754102	+	UCUCAAGCUGUGACUGCAAAGGGAAGCCCUUUCUGUUGUCUAAAAGAAAAGAAAGUGCUUCCCUUUGGUGAAUUACGGUUUGAGA	1.77604	-0.0423097	8.45736	0.0036357	0.00769978
hsa-mir-516a-1	MI0003180	Chr19	53756741	53756830	+	UCUCAGGCUGUGACCUUCUCGAGGAAAGAAGCACUUUCUGUUGUCUGAAAGAAAAGAAAGUGCUUCCUUUCAGAGGGUUACGGUUUGAGA	3.05412	1.66574	28.1651	1.11397e-07	4.55332e-07
hsa-mir-516a-2	MI0003181	Chr19	53761133	53761222	+	UCUCAGGUUGUGACCUUCUCGAGGAAAGAAGCACUUUCUGUUGUCUGAAAGAAAAGAAAGUGCUUCCUUUCAGAGGGUUACGGUUUGAGA	2.86437	1.57696	26.3193	2.89382e-07	1.10549e-06
hsa-mir-520e	MI0003143	Chr19	53675711	53675797	+	UCUCCUGCUGUGACCCUCAAGAUGGAAGCAGUUUCUGUUGUCUGAAAGGAAAGAAAGUGCUUCCUUUUUGAGGGUUACUGUUUGAGA	1.75918	-0.485151	9.68859	0.00185416	0.00408731
hsa-mir-498	MI0003142	Chr19	53674197	53674320	+	AACCCUCCUUGGGAAGUGAAGCUCAGGCUGUGAUUUCAAGCCAGGGGGCGUUUUUCUAUAACUGGAUGAAAAGCACCUCCAGAGCUUGAAGCUCACAGUUUGAGAGCAAUCGUCUAAGGAAGUU	#N/A	#N/A	#N/A	#N/A	#N/A
hsa-mir-1283-2	MI0006430	Chr19	53758232	53758318	+	CUCAAGCUGUGAGUCUACAAAGGAAAGCGCUUUCUGUUGUCUGAAAGAAAAGAAAUCGCUUCCCUUUGGAGUGUUACGGUUUGAGAA	2.55375	-0.278011	12.9884	0.000313435	0.000800429
hsa-mir-1283-1	MI0003832	Chr19	53688481	53688567	+	CUCAAGCUAUGAGUCUACAAAGGAAAGCGCUUUCUGUUGUCAGAAAGAAGAGAAAGCGCUUCCCUUUUGAGGGUUACGGUUUGAGAA	1.97404	-0.426947	7.59689	0.0058469	0.0118288
hsa-mir-379	MI0000787	Chr14	101022066	101022132	+	AGAGAUGGUAGACUAUGGAACGUAGGCGUUAUGAUUUCUGACCUAUGUAACAUGGUCCACUAACUCU	-1.18707	9.66782	146.679	9.22365e-34	1.98947e-32
hsa-mir-411	MI0003675	Chr14	101023325	101023420	+	UGGUACUUGGAGAGAUAGUAGACCGUAUAGCGUACGCUUUAUCUGUGACGUAUGUAACACGGUCCACUAACCCUCAGUAUCAAAUCCAUCCCCGAG	#N/A	#N/A	#N/A	#N/A	#N/A
hsa-mir-299	MI0000744	Chr14	101023794	101023856	+	AAGAAAUGGUUUACCGUCCCACAUACAUUUUGAAUAUGUAUGUGGGAUGGUAAACCGCUUCUU	-1.17333	2.1655	125.771	3.4509e-29	5.37573e-28
hsa-mir-380	MI0000788	Chr14	101025017	101025077	+	AAGAUGGUUGACCAUAGAACAUGCGCUAUCUCUGUGUCGUAUGUAAUAUGGUCCACAUCUU	#N/A	#N/A	#N/A	#N/A	#N/A
hsa-mir-1197	MI0006656	Chr14	101025564	101025651	+	ACUUCCUGGUAUUUGAAGAUGCGGUUGACCAUGGUGUGUACGCUUUAUUUGUGACGUAGGACACAUGGUCUACUUCUUCUCAAUAUCA	#N/A	#N/A	#N/A	#N/A	#N/A
hsa-mir-323a	MI0000807	Chr14	101025732	101025817	+	UUGGUACUUGGAGAGAGGUGGUCCGUGGCGCGUUCGCUUUAUUUAUGGCGCACAUUACACGGUCGACCUCUUUGCAGUAUCUAAUC	#N/A	#N/A	#N/A	#N/A	#N/A
hsa-mir-758	MI0003757	Chr14	101026020	101026107	+	GCCUGGAUACAUGAGAUGGUUGACCAGAGAGCACACGCUUUAUUUGUGCCGUUUGUGACCUGGUCCACUAACCCUCAGUAUCUAAUGC	#N/A	#N/A	#N/A	#N/A	#N/A
hsa-mir-329-1	MI0001725	Chr14	101026785	101026864	+	GGUACCUGAAGAGAGGUUUUCUGGGUUUCUGUUUCUUUAAUGAGGACGAAACACACCUGGUUAACCUCUUUUCCAGUAUC	#N/A	#N/A	#N/A	#N/A	#N/A
hsa-mir-329-2	MI0001726	Chr14	101027100	101027183	+	GUGGUACCUGAAGAGAGGUUUUCUGGGUUUCUGUUUCUUUAUUGAGGACGAAACACACCUGGUUAACCUCUUUUCCAGUAUCAA	-1.03211	0.0686492	38.7933	4.71153e-10	2.43748e-09
hsa-mir-494	MI0003134	Chr14	101029634	101029714	+	GAUACUCGAAGGAGAGGUUGUCCGUGUUGUCUUCUCUUUAUUUAUGAUGAAACAUACACGGGAAACCUCUUUUUUAGUAUC	-1.07474	1.31779	69.9298	6.14544e-17	5.00925e-16
hsa-mir-1193	MI0014205	Chr14	101030052	101030129	+	GUAGCUGAGGGGAUGGUAGACCGGUGACGUGCACUUCAUUUACGAUGUAGGUCACCCGUUUGACUAUCCACCAGCGCC	#N/A	#N/A	#N/A	#N/A	#N/A
hsa-mir-543	MI0005565	Chr14	101031987	101032064	+	UACUUAAUGAGAAGUUGCCCGUGUUUUUUUCGCUUUAUUUGUGACGAAACAUUCGCGGUGCACUUCUUUUUCAGUAUC	#N/A	#N/A	#N/A	#N/A	#N/A
hsa-mir-495	MI0003135	Chr14	101033755	101033836	+	UGGUACCUGAAAAGAAGUUGCCCAUGUUAUUUUCGCUUUAUAUGUGACGAAACAAACAUGGUGCACUUCUUUUUCGGUAUCA	-1.32998	3.23704	147.065	7.59467e-34	1.66371e-32
hsa-mir-376c	MI0000776	Chr14	101039690	101039755	+	AAAAGGUGGAUAUUCCUUCUAUGUUUAUGUUAUUUAUGGUUAAACAUAGAGGAAAUUCCACGUUUU	-1.00494	2.66639	74.4202	6.31396e-18	5.49824e-17
hsa-mir-376a-2	MI0003529	Chr14	101040069	101040148	+	GGUAUUUAAAAGGUAGAUUUUCCUUCUAUGGUUACGUGUUUGAUGGUUAAUCAUAGAGGAAAAUCCACGUUUUCAGUAUC	#N/A	#N/A	#N/A	#N/A	#N/A
hsa-mir-654	MI0003676	Chr14	101040219	101040299	+	GGGUAAGUGGAAAGAUGGUGGGCCGCAGAACAUGUGCUGAGUUCGUGCCAUAUGUCUGCUGACCAUCACCUUUAGAAGCCC	-1.05603	4.68658	83.4877	6.41147e-20	6.15677e-19
hsa-mir-376b	MI0002466	Chr14	101040436	101040535	+	CAGUCCUUCUUUGGUAUUUAAAACGUGGAUAUUCCUUCUAUGUUUACGUGAUUCCUGGUUAAUCAUAGAGGAAAAUCCAUGUUUUCAGUAUCAAAUGCUG	#N/A	#N/A	#N/A	#N/A	#N/A
hsa-mir-376a-1	MI0000784	Chr14	101040782	101040849	+	UAAAAGGUAGAUUCUCCUUCUAUGAGUACAUUAUUUAUGAUUAAUCAUAGAGGAAAAUCCACGUUUUC	#N/A	#N/A	#N/A	#N/A	#N/A
hsa-mir-300	MI0005525	Chr14	101041363	101041445	+	UGCUACUUGAAGAGAGGUAAUCCUUCACGCAUUUGCUUUACUUGCAAUGAUUAUACAAGGGCAGACUCUCUCUGGGGAGCAAA	#N/A	#N/A	#N/A	#N/A	#N/A
hsa-mir-1185-1	MI0003844	Chr14	101042977	101043062	+	UUUGGUACUUGAAGAGAGGAUACCCUUUGUAUGUUCACUUGAUUAAUGGCGAAUAUACAGGGGGAGACUCUUAUUUGCGUAUCAAA	#N/A	#N/A	#N/A	#N/A	#N/A
hsa-mir-1185-2	MI0003821	Chr14	101044198	101044283	+	UUUGGUACUUAAAGAGAGGAUACCCUUUGUAUGUUCACUUGAUUAAUGGCGAAUAUACAGGGGGAGACUCUCAUUUGCGUAUCAAA	#N/A	#N/A	#N/A	#N/A	#N/A
hsa-mir-381	MI0000789	Chr14	101045920	101045994	+	UACUUAAAGCGAGGUUGCCCUUUGUAUAUUCGGUUUAUUGACAUGGAAUAUACAAGGGCAAGCUCUCUGUGAGUA	-1.29092	5.02534	185.148	3.64241e-42	1.02133e-40
hsa-mir-487b	MI0003530	Chr14	101046455	101046538	+	UUGGUACUUGGAGAGUGGUUAUCCCUGUCCUGUUCGUUUUGCUCAUGUCGAAUCGUACAGGGUCAUCCACUUUUUCAGUAUCAA	#N/A	#N/A	#N/A	#N/A	#N/A
hsa-mir-539	MI0003514	Chr14	101047321	101047398	+	AUACUUGAGGAGAAAUUAUCCUUGGUGUGUUCGCUUUAUUUAUGAUGAAUCAUACAAGGACAAUUUCUUUUUGAGUAU	#N/A	#N/A	#N/A	#N/A	#N/A
hsa-mir-889	MI0005540	Chr14	101047901	101047979	+	GUGCUUAAAGAAUGGCUGUCCGUAGUAUGGUCUCUAUAUUUAUGAUGAUUAAUAUCGGACAACCAUUGUUUUAGUAUCC	#N/A	#N/A	#N/A	#N/A	#N/A
hsa-mir-544a	MI0003515	Chr14	101048658	101048748	+	AUUUUCAUCACCUAGGGAUCUUGUUAAAAAGCAGAUUCUGAUUCAGGGACCAAGAUUCUGCAUUUUUAGCAAGUUCUCAAGUGAUGCUAAU	#N/A	#N/A	#N/A	#N/A	#N/A
hsa-mir-655	MI0003677	Chr14	101049550	101049646	+	AACUAUGCAAGGAUAUUUGAGGAGAGGUUAUCCGUGUUAUGUUCGCUUCAUUCAUCAUGAAUAAUACAUGGUUAACCUCUUUUUGAAUAUCAGACUC	#N/A	#N/A	#N/A	#N/A	#N/A
hsa-mir-487a	MI0002471	Chr14	101052446	101052525	+	GGUACUUGAAGAGUGGUUAUCCCUGCUGUGUUCGCUUAAUUUAUGACGAAUCAUACAGGGACAUCCAGUUUUUCAGUAUC	#N/A	#N/A	#N/A	#N/A	#N/A
hsa-mir-382	MI0000790	Chr14	101054306	101054381	+	UACUUGAAGAGAAGUUGUUCGUGGUGGAUUCGCUUUACUUAUGACGAAUCAUUCACGGACAACACUUUUUUCAGUA	#N/A	#N/A	#N/A	#N/A	#N/A
hsa-mir-134	MI0000474	Chr14	101054687	101054759	+	CAGGGUGUGUGACUGGUUGACCAGAGGGGCAUGCACUGUGUUCACCCUGUGGGCCACCUAGUCACCAACCCUC	#N/A	#N/A	#N/A	#N/A	#N/A
hsa-mir-668	MI0003761	Chr14	101055258	101055323	+	GGUAAGUGCGCCUCGGGUGAGCAUGCACUUAAUGUGGGUGUAUGUCACUCGGCUCGGCCCACUACC	#N/A	#N/A	#N/A	#N/A	#N/A
hsa-mir-485	MI0002469	Chr14	101055419	101055491	+	ACUUGGAGAGAGGCUGGCCGUGAUGAAUUCGAUUCAUCAAAGCGAGUCAUACACGGCUCUCCUCUCUUUUAGU	#N/A	#N/A	#N/A	#N/A	#N/A
hsa-mir-323b	MI0014206	Chr14	101056219	101056300	+	UGGUACUCGGAGGGAGGUUGUCCGUGGUGAGUUCGCAUUAUUUAAUGAUGCCCAAUACACGGUCGACCUCUUUUCGGUAUCA	#N/A	#N/A	#N/A	#N/A	#N/A
hsa-mir-154	MI0000480	Chr14	101059755	101059838	+	GUGGUACUUGAAGAUAGGUUAUCCGUGUUGCCUUCGCUUUAUUUGUGACGAAUCAUACACGGUUGACCUAUUUUUCAGUACCAA	#N/A	#N/A	#N/A	#N/A	#N/A
hsa-mir-496	MI0003136	Chr14	101060573	101060674	+	CCCAAGUCAGGUACUCGAAUGGAGGUUGUCCAUGGUGUGUUCAUUUUAUUUAUGAUGAGUAUUACAUGGCCAAUCUCCUUUCGGUACUCAAUUCUUCUUGGG	#N/A	#N/A	#N/A	#N/A	#N/A
hsa-mir-377	MI0000785	Chr14	101062050	101062118	+	UUGAGCAGAGGUUGCCCUUGGUGAAUUCGCUUUAUUUAUGUUGAAUCACACAAAGGCAACUUUUGUUUG	-1.24352	2.06538	144.593	2.63532e-33	5.59805e-32
hsa-mir-541	MI0005539	Chr14	101064495	101064578	+	ACGUCAGGGAAAGGAUUCUGCUGUCGGUCCCACUCCAAAGUUCACAGAAUGGGUGGUGGGCACAGAAUCUGGACUCUGCUUGUG	#N/A	#N/A	#N/A	#N/A	#N/A
hsa-mir-409	MI0001735	Chr14	101065300	101065378	+	UGGUACUCGGGGAGAGGUUACCCGAGCAACUUUGCAUCUGGACGACGAAUGUUGCUCGGUGAACCCCUUUUCGGUAUCA	#N/A	#N/A	#N/A	#N/A	#N/A
hsa-mir-412	MI0002464	Chr14	101065447	101065537	+	CUGGGGUACGGGGAUGGAUGGUCGACCAGUUGGAAAGUAAUUGUUUCUAAUGUACUUCACCUGGUCCACUAGCCGUCCGUAUCCGCUGCAG	#N/A	#N/A	#N/A	#N/A	#N/A
hsa-mir-369	MI0000777	Chr14	101065598	101065667	+	UUGAAGGGAGAUCGACCGUGUUAUAUUCGCUUUAUUGACUUCGAAUAAUACAUGGUUGAUCUUUUCUCAG	#N/A	#N/A	#N/A	#N/A	#N/A
hsa-mir-410	MI0002465	Chr14	101065912	101065991	+	GGUACCUGAGAAGAGGUUGUCUGUGAUGAGUUCGCUUUUAUUAAUGACGAAUAUAACACAGAUGGCCUGUUUUCAGUACC	#N/A	#N/A	#N/A	#N/A	#N/A
hsa-mir-656	MI0003678	Chr14	101066724	101066801	+	CUGAAAUAGGUUGCCUGUGAGGUGUUCACUUUCUAUAUGAUGAAUAUUAUACAGUCAACCUCUUUCCGAUAUCGAAUC	#N/A	#N/A	#N/A	#N/A	#N/A
hsa-mir-493	MI0003132	Chr14	100869060	100869148	+	CUGGCCUCCAGGGCUUUGUACAUGGUAGGCUUUCAUUCAUUCGUUUGCACAUUCGGUGAAGGUCUACUGUGUGCCAGGCCCUGUGCCAG	1.45947	3.91007	103.508	2.59379e-24	3.21813e-23
hsa-mir-337	MI0000806	Chr14	100874493	100874585	+	GUAGUCAGUAGUUGGGGGGUGGGAACGGCUUCAUACAGGAGUUGAUGCACAGUUAUCCAGCUCCUAUAUGAUGCCUUUCUUCAUCCCCUUCAA	-1.91296	5.58153	334.798	8.66681e-75	4.67341e-73
hsa-mir-665	MI0005563	Chr14	100875033	100875104	+	UCUCCUCGAGGGGUCUCUGCCUCUACCCAGGACUCUUUCAUGACCAGGAGGCUGAGGCCCCUCACAGGCGGC	-1.75284	0.153759	171.336	3.7792e-39	9.81191e-38
hsa-mir-431	MI0001721	Chr14	100881007	100881120	+	UCCUGCUUGUCCUGCGAGGUGUCUUGCAGGCCGUCAUGCAGGCCACACUGACGGUAACGUUGCAGGUCGUCUUGCAGGGCUUCUCGCAAGACGACAUCCUCAUCACCAACGACG	#N/A	#N/A	#N/A	#N/A	#N/A
hsa-mir-433	MI0001723	Chr14	100881886	100881978	+	CCGGGGAGAAGUACGGUGAGCCUGUCAUUAUUCAGAGAGGCUAGAUCCUCUGUGUUGAGAAGGAUCAUGAUGGGCUCCUCGGUGUUCUCCAGG	-1.3013	1.0053	94.7704	2.138e-22	2.30575e-21
hsa-mir-127	MI0000472	Chr14	100882979	100883075	+	UGUGAUCACUGUCUCCAGCCUGCUGAAGCUCAGAGGGCUCUGAUUCAGAAAGAUCAUCGGAUCCGUCUGAGCUUGGCUGGUCGGAAGUCUCAUCAUC	#N/A	#N/A	#N/A	#N/A	#N/A
hsa-mir-432	MI0003133	Chr14	100884483	100884576	+	UGACUCCUCCAGGUCUUGGAGUAGGUCAUUGGGUGGAUCCUCUAUUUCCUUACGUGGGCCACUGGAUGGCUCCUCCAUGUCUUGGAGUAGAUCA	-1.1031	3.05616	74.9739	4.76977e-18	4.23242e-17
hsa-mir-136	MI0000475	Chr14	100884702	100884783	+	UGAGCCCUCGGAGGACUCCAUUUGUUUUGAUGAUGGAUUCUUAUGCUCCAUCAUCGUCUCAAAUGAGUCUUCAGAGGGUUCU	#N/A	#N/A	#N/A	#N/A	#N/A
hsa-mir-532	MI0003205	ChrX	50003148	50003238	+	CGACUUGCUUUCUCUCCUCCAUGCCUUGAGUGUAGGACCGUUGGCAUCUUAAUUACCCUCCCACACCCAAGGCUUGCAGAAGAGCGAGCCU	#N/A	#N/A	#N/A	#N/A	#N/A
hsa-mir-188	MI0000484	ChrX	50003503	50003588	+	UGCUCCCUCUCUCACAUCCCUUGCAUGGUGGAGGGUGAGCUUUCUGAAAACCCCUCCCACAUGCAGGGUUUGCAGGAUGGCGAGCC	1.49896	1.88442	76.7896	1.90177e-18	1.70915e-17
hsa-mir-500a	MI0003184	ChrX	50008431	50008514	+	GCUCCCCCUCUCUAAUCCUUGCUACCUGGGUGAGAGUGCUGUCUGAAUGCAAUGCACCUGGGCAAGGAUUCUGAGAGCGAGAGC	#N/A	#N/A	#N/A	#N/A	#N/A
hsa-mir-362	MI0000762	ChrX	50008964	50009028	+	CUUGAAUCCUUGGAACCUAGGUGUGAGUGCUAUUUCAGUGCAACACACCUAUUCAAGGAUUCAAA	#N/A	#N/A	#N/A	#N/A	#N/A
hsa-mir-501	MI0003185	ChrX	50009722	50009805	+	GCUCUUCCUCUCUAAUCCUUUGUCCCUGGGUGAGAGUGCUUUCUGAAUGCAAUGCACCCGGGCAAGGAUUCUGAGAGGGUGAGC	#N/A	#N/A	#N/A	#N/A	#N/A
hsa-mir-500b	MI0015903	ChrX	50010672	50010750	+	CCCCCUCUCUAAUCCUUGCUACCUGGGUGAGAGUGCUUUCUGAAUGCAGUGCACCCAGGCAAGGAUUCUGCAAGGGGGA	#N/A	#N/A	#N/A	#N/A	#N/A
hsa-mir-660	MI0003684	ChrX	50013241	50013337	+	CUGCUCCUUCUCCCAUACCCAUUGCAUAUCGGAGUUGUGAAUUCUCAAAACACCUCCUGUGUGCAUGGAUUACAGGAGGGUGAGCCUUGUCAUCGUG	#N/A	#N/A	#N/A	#N/A	#N/A
hsa-mir-502	MI0003186	ChrX	50014598	50014683	+	UGCUCCCCCUCUCUAAUCCUUGCUAUCUGGGUGCUAGUGCUGGCUCAAUGCAAUGCACCUGGGCAAGGAUUCAGAGAGGGGGAGCU	#N/A	#N/A	#N/A	#N/A	#N/A
hsa-mir-3689f	MI0016837	Chr9	134850742	134850807	-	AGGUGUGAUAUCGUGCUUCCUGGGACGUGUGAUGCUGUGCUUCCUGGGAGGUGUGAUCCCACACUC	#N/A	#N/A	#N/A	#N/A	#N/A
hsa-mir-3689e	MI0016836	Chr9	134850570	134850641	-	GGGAGGUGUGAUAUCAUGGUUCCUGGGAGGUAUGAUAUCGUGGUUCCUGGGAGGUGUGAUCCCGUGCUCCCU	#N/A	#N/A	#N/A	#N/A	#N/A
hsa-mir-3689d-2	MI0016835	Chr9	134850277	134850356	-	ACUGGGAGGUGUGAUCUCACACUCGCUGGGAGGUGUGCUAUCGUCUUCCCUGGGAGGUGUGAUCCUGUUCUUCCUGAGCG	#N/A	#N/A	#N/A	#N/A	#N/A
hsa-mir-3689b	MI0016411	Chr9	134850125	134850272	-	GAUCCUGUGCUCCCUGGGGGGUCUGAUCCUGUGCUUCCUGGGAGGUGUGAUAUCAUGGUUCCUGGGAGGUGUGAUCCCGUGCUUCCUGGGAGGUGUGAUAUUGUGGUUCCUGGGAGGUGUGAUCCCGUGCUCCCUGGGAGGUGUGAUC	#N/A	#N/A	#N/A	#N/A	#N/A
hsa-mir-3689d-1	MI0016834	Chr9	134849609	134849682	-	UGGGAGGUGUGAUCUCACACUCGCUGGGAGGUGUGCUAUCGUCUUCCCCGGGAGGUGUGAUCCUGUUCUUCCUG	#N/A	#N/A	#N/A	#N/A	#N/A
hsa-mir-3689a	MI0016090	Chr9	134849487	134849564	-	CCUGGGAGGUGUGAUAUCAUGGUUCCUGGGAGGUGUGAUCCUGUGCUUCCUGGGAGGUGUGAUAUCGUGGUUCCUGGG	#N/A	#N/A	#N/A	#N/A	#N/A
hsa-mir-3689c	MI0016832	Chr9	134849298	134849369	-	GGGAGGUGUGAUAUCGUGGUUCCUGGGAGGUGUGAUAUCGUGGUUCCUGGGAGGUGUGAUAUUGUGGUUCCU	#N/A	#N/A	#N/A	#N/A	#N/A
hsa-mir-17	MI0000071	Chr13	91350605	91350688	+	GUCAGAAUAAUGUCAAAGUGCUUACAGUGCAGGUAGUGAUAUGUGCAUCUACUGCAGUGAAGGCACUUGUAGCAUUAUGGUGAC	1.14157	9.48859	72.1337	2.01095e-17	1.6984e-16
hsa-mir-18a	MI0000072	Chr13	91350751	91350821	+	UGUUCUAAGGUGCAUCUAGUGCAGAUAGUGAAGUAGAUUAGCAUCUACUGCCCUAAGUGCUCCUUCUGGCA	1.50503	3.91588	67.003	2.71098e-16	2.13528e-15
hsa-mir-19a	MI0000073	Chr13	91350891	91350972	+	GCAGUCCUCUGUUAGUUUUGCAUAGUUGCACUACAAGAAGAAUGUAGUUGUGCAAAUCUAUGCAAAACUGAUGGUGGCCUGC	1.34028	5.10659	73.899	8.22186e-18	7.11546e-17
hsa-mir-20a	MI0000076	Chr13	91351065	91351135	+	GUAGCACUAAAGUGCUUAUAGUGCAGGUAGUGUUUAGUUAUCUACUGCAUUAUGAGCACUUAAAGUACUGC	#N/A	#N/A	#N/A	#N/A	#N/A
hsa-mir-19b-1	MI0000074	Chr13	91351192	91351278	+	CACUGUUCUAUGGUUAGUUUUGCAGGUUUGCAUCCAGCUGUGUGAUAUUCUGCUGUGCAAAUCCAUGCAAAACUGACUGUGGUAGUG	#N/A	#N/A	#N/A	#N/A	#N/A
hsa-mir-92a-1	MI0000093	Chr13	91351314	91351391	+	CUUUCUACACAGGUUGGGAUCGGUUGCAAUGCUGUGUUUCUGUAUGGUAUUGCACUUGUCCCGGCCUGUUGAGUUUGG	#N/A	#N/A	#N/A	#N/A	#N/A
hsa-mir-106a	MI0000113	ChrX	134170198	134170278	-	CCUUGGCCAUGUAAAAGUGCUUACAGUGCAGGUAGCUUUUUGAGAUCUACUGCAAUGUAAGCACUUCUUACAUUACCAUGG	1.17797	4.62702	55.8447	7.84296e-14	5.2113e-13
hsa-mir-18b	MI0001518	ChrX	134170041	134170111	-	UGUGUUAAGGUGCAUCUAGUGCAGUUAGUGAAGCAGCUUAGAAUCUACUGCCCUAAAUGCCCCUUCUGGCA	#N/A	#N/A	#N/A	#N/A	#N/A
hsa-mir-20b	MI0001519	ChrX	134169809	134169877	-	AGUACCAAAGUGCUCAUAGUGCAGGUAGUUUUGGCAUGACUCUACUGUAGUAUGGGCACUUCCAGUACU	1.22131	5.51018	37.1691	1.08319e-09	5.3852e-09
hsa-mir-19b-2	MI0000075	ChrX	134169671	134169766	-	ACAUUGCUACUUACAAUUAGUUUUGCAGGUUUGCAUUUCAGCGUAUAUAUGUAUAUGUGGCUGUGCAAAUCCAUGCAAAACUGAUUGUGAUAAUGU	#N/A	#N/A	#N/A	#N/A	#N/A
hsa-mir-92a-2	MI0000094	ChrX	134169538	134169612	-	UCAUCCCUGGGUGGGGAUUUGUUGCAUUACUUGUGUUCUAUAUAAAGUAUUGCACUUGUCCCGGCCUGUGGAAGA	#N/A	#N/A	#N/A	#N/A	#N/A
hsa-mir-363	MI0000764	ChrX	134169378	134169452	-	UGUUGUCGGGUGGAUCACGAUGCAAUUUUGAUGAGUAUCAUAGGAGAAAAAUUGCACGGUAUCCAUCUGUAAACC	#N/A	#N/A	#N/A	#N/A	#N/A
hsa-mir-424	MI0001446	ChrX	134546614	134546711	-	CGAGGGGAUACAGCAGCAAUUCAUGUUUUGAAGUGUUCUAAAUGGUUCAAAACGUGAGGCGCUGCUAUACCCCCUCGUGGGGAAGGUAGAAGGUGGGG	#N/A	#N/A	#N/A	#N/A	#N/A
hsa-mir-503	MI0003188	ChrX	134546328	134546398	-	UGCCCUAGCAGCGGGAACAGUUCUGCAGUGAGCGAUCGGUGCUCUGGGGUAUUGUUUCCGCUGCCAGGGUA	1.35414	4.17326	73.6352	9.3972e-18	8.08274e-17
hsa-mir-542	MI0003686	ChrX	134541341	134541437	-	CAGAUCUCAGACAUCUCGGGGAUCAUCAUGUCACGAGAUACCAGUGUGCACUUGUGACAGAUUGAUAACUGAAAGGUCUGGGAGCCACUCAUCUUCA	#N/A	#N/A	#N/A	#N/A	#N/A
hsa-mir-450a-2	MI0003187	ChrX	134540508	134540607	-	CCAAAGAAAGAUGCUAAACUAUUUUUGCGAUGUGUUCCUAAUAUGUAAUAUAAAUGUAUUGGGGACAUUUUGCAUUCAUAGUUUUGUAUCAAUAAUAUGG	#N/A	#N/A	#N/A	#N/A	#N/A
hsa-mir-450a-1	MI0001652	ChrX	134540341	134540431	-	AAACGAUACUAAACUGUUUUUGCGAUGUGUUCCUAAUAUGCACUAUAAAUAUAUUGGGAACAUUUUGCAUGUAUAGUUUUGUAUCAAUAUA	#N/A	#N/A	#N/A	#N/A	#N/A
hsa-mir-450b	MI0005531	ChrX	134540185	134540262	-	GCAGAAUUAUUUUUGCAAUAUGUUCCUGAAUAUGUAAUAUAAGUGUAUUGGGAUCAUUUUGCAUCCAUAGUUUUGUAU	#N/A	#N/A	#N/A	#N/A	#N/A
hsa-mir-891b	MI0005534	ChrX	146001053	146001131	-	CCUUAAUCCUUGCAACUUACCUGAGUCAUUGAUUCAGUAAAACAUUCAAUGGCACAUGUUUGUUGUUAGGGUCAAAAGA	#N/A	#N/A	#N/A	#N/A	#N/A
hsa-mir-892b	MI0005538	ChrX	145997198	145997274	-	UGCAAUGCCCUACUCAGAAAGGUGCCAUUUAUGUAGAUUUUAUGUCACUGGCUCCUUUCUGGGUAGAGCAAGGCUCA	#N/A	#N/A	#N/A	#N/A	#N/A
hsa-mir-892a	MI0005528	ChrX	145996669	145996743	-	GCAGUGCCUUACUCAGAAAGGUGCCAGUCACUUACACUACAUGUCACUGUGUCCUUUCUGCGUAGAGUAAGGCUC	#N/A	#N/A	#N/A	#N/A	#N/A
hsa-mir-888	MI0005537	ChrX	145994784	145994860	-	GGCAGUGCUCUACUCAAAAAGCUGUCAGUCACUUAGAUUACAUGUGACUGACACCUCUUUGGGUGAAGGAAGGCUCA	#N/A	#N/A	#N/A	#N/A	#N/A
hsa-mir-890	MI0005533	ChrX	145994275	145994351	-	GGAAGUGCCCUACUUGGAAAGGCAUCAGUUGCUUAGAUUACAUGUAACUAUUCCCUUUCUGAGUAGAGUAAGUCUUA	#N/A	#N/A	#N/A	#N/A	#N/A
hsa-mir-892c	MI0022560	ChrX	145992750	145992826	-	GGCAGUGCCCUAUUCAGAAAGGUGCCAGUCACUUAGAUUACAUGUCACUGUUUCCUUUCUGAGUGGAGUAGGGCUUA	#N/A	#N/A	#N/A	#N/A	#N/A
hsa-mir-941-1	MI0005763	Chr20	63919449	63919520	+	UGUGGACAUGUGCCCAGGGCCCGGGACAGCGCCACGGAAGAGGACGCACCCGGCUGUGUGCACAUGUGCCCA	#N/A	#N/A	#N/A	#N/A	#N/A
hsa-mir-941-2	MI0005764	Chr20	63919505	63919576	+	UGUGCACAUGUGCCCAGGGCCCGGGACAGCGCCACGGAAGAGGACGCACCCGGCUGUGUGCACAUGUGCCCA	#N/A	#N/A	#N/A	#N/A	#N/A
hsa-mir-941-3	MI0005765	Chr20	63919561	63919632	+	UGUGCACAUGUGCCCAGGGCCCGGGACAGCGCCACGGAAGAGGACGCACCCGGCUGUGUGCACAUGUGCCCA	#N/A	#N/A	#N/A	#N/A	#N/A
hsa-mir-941-4	MI0005766	Chr20	63919756	63919827	+	UGUGCACAUGUGCCCAGGGCCCGGGACAGCGCCACGGAAGAGGACGCACCCGGCUGUGUGCACAUGUGCCCA	#N/A	#N/A	#N/A	#N/A	#N/A
hsa-mir-941-5	MI0031520	Chr20	63919868	63919939	+	UGUGCACAUGUGCCCAGGGCCCGGGACAGCGCCACGGAAGAGGACGCACCCGGCUGUGUGCACAUGUGCCCA	#N/A	#N/A	#N/A	#N/A	#N/A
hsa-mir-302b	MI0000772	Chr4	112648485	112648557	-	GCUCCCUUCAACUUUAACAUGGAAGUGCUUUCUGUGACUUUAAAAGUAAGUGCUUCCAUGUUUUAGUAGGAGU	#N/A	#N/A	#N/A	#N/A	#N/A
hsa-mir-302c	MI0000773	Chr4	112648363	112648430	-	CCUUUGCUUUAACAUGGGGGUACCUGCUGUGUGAAACAAAAGUAAGUGCUUCCAUGUUUCAGUGGAGG	#N/A	#N/A	#N/A	#N/A	#N/A
hsa-mir-302a	MI0000738	Chr4	112648183	112648251	-	CCACCACUUAAACGUGGAUGUACUUGCUUUGAAACUAAAGAAGUAAGUGCUUCCAUGUUUUGGUGAUGG	#N/A	#N/A	#N/A	#N/A	#N/A
hsa-mir-302d	MI0000774	Chr4	112648004	112648071	-	CCUCUACUUUAACAUGGAGGCACUUGCUGUGACAUGACAAAAAUAAGUGCUUCCAUGUUUGAGUGUGG	#N/A	#N/A	#N/A	#N/A	#N/A
hsa-mir-367	MI0000775	Chr4	112647874	112647941	-	CCAUUACUGUUGCUAAUAUGCAACUCUGUUGAAUAUAAAUUGGAAUUGCACUUUAGCAAUGGUGAUGG	#N/A	#N/A	#N/A	#N/A	#N/A
hsa-mir-6749	MI0022594	Chr11	64902387	64902455	-	GGCCCUCGGGCCUGGGGUUGGGGGAGCUCUGUCCUGUCUCACUCAUUGCUCCUCCCCUGCCUGGCCCAG	#N/A	#N/A	#N/A	#N/A	#N/A
hsa-mir-6750	MI0022595	Chr11	64898363	64898437	-	GCUGUCAGGGAACAGCUGGGUGAGCUGCUGCCCCAGAGGCCCAGCAGGUGUCCAGAACUCACCCUCUGCUCCCAG	#N/A	#N/A	#N/A	#N/A	#N/A
hsa-mir-194-2	MI0000732	Chr11	64891355	64891439	-	UGGUUCCCGCCCCCUGUAACAGCAACUCCAUGUGGAAGUGCCCACUGGUUCCAGUGGGGCUGCUGUUAUCUGGGGCGAGGGCCAG	#N/A	#N/A	#N/A	#N/A	#N/A
hsa-mir-192	MI0000234	Chr11	64891137	64891246	-	GCCGAGACCGAGUGCACAGGGCUCUGACCUAUGAAUUGACAGCCAGUGCUCUCGUCUCCCCUCUGGCUGCCAAUUCCAUAGGUCACAGGUAUGUUCGCCUCAAUGCCAGC	1.49493	9.07366	143.441	4.70718e-33	9.7051e-32
hsa-mir-4537	MI0016908	Chr14	105859484	105859553	-	UGAGCCGAGCUGAGCUUAGCUGGGCUGAGCUAACCAGGGCUGGGCUGAGCUGGGCUGAGCUGAGCUGAGC	#N/A	#N/A	#N/A	#N/A	#N/A
hsa-mir-4538	MI0016909	Chr14	105858165	105858242	-	GAGCUUGGAUGAGCUGGGCUGAACUGGGCUGGGUUGAGCUGGGCUGGGCUGAGUUGAGCCAGACUGAUCUGGGCUGAG	#N/A	#N/A	#N/A	#N/A	#N/A
hsa-mir-4507	MI0016871	Chr14	105858124	105858175	-	UCUGGGCUGAGCCGAGCUGGGUUAAGCCGAGCUGGGUUGGGCUGGGCUGGGU	#N/A	#N/A	#N/A	#N/A	#N/A
hsa-mir-4539	MI0016910	Chr14	105857513	105857572	-	UGAGCUGAGCUCUGCUGUGCUGUGCUGAGCAGGGCUGAGCUGAACUGGGCUGAGCUGGGC	#N/A	#N/A	#N/A	#N/A	#N/A
hsa-mir-4732	MI0017369	Chr17	28861655	28861730	-	GAGGGAGCUGUAGAGCAGGGAGCAGGAAGCUGUGUGUGUCCAGCCCUGACCUGUCCUGUUCUGCCCCCAGCCCCUC	-3.86602	-0.012409	444.441	1.16943e-98	7.80734e-97
hsa-mir-144	MI0000460	Chr17	28861533	28861618	-	UGGGGCCCUGGCUGGGAUAUCAUCAUAUACUGUAAGUUUGCGAUGAGACACUACAGUAUAGAUGAUGUACUAGUCCGGGCACCCCC	-2.9563	6.75369	531.787	1.1537e-117	1.2442e-115
hsa-mir-451b	MI0017360	Chr17	28861371	28861438	+	UGGGUAUAGCAAGAGAACCAUUACCAUUACUAAACUCAGUAAUGGUAACGGUUUCCUUGCCAUUCCCA	#N/A	#N/A	#N/A	#N/A	#N/A
hsa-mir-451a	MI0001729	Chr17	28861369	28861440	-	CUUGGGAAUGGCAAGGAAACCGUUACCAUUACUGAGUUUAGUAAUGGUAAUGGUUCUCUUGCUAUACCCAGA	-3.33314	8.89664	632.285	1.5918e-139	2.0288e-137
hsa-mir-1250	MI0006385	Chr17	81133196	81133308	-	CUGUCCCGCUGGCCUGGCAGGUGACGGUGCUGGAUGUGGCCUUUUUGCCUUUUCUAAAGGCCACAUUUUCCAGCCCAUUCAACCUUCCAGAGCCCUCUGAAGUGGCCACAGGC	1.702	-0.451164	25.9143	3.56921e-07	1.34879e-06
hsa-mir-338	MI0000814	Chr17	81125883	81125949	-	UCUCCAACAAUAUCCUGGUGCUGAGUGAUGACUCAGGCGACUCCAGCAUCAGUGAUUUUGUUGAAGA	#N/A	#N/A	#N/A	#N/A	#N/A
hsa-mir-3065	MI0014228	Chr17	81125877	81125955	+	CUGCCCUCUUCAACAAAAUCACUGAUGCUGGAGUCGCCUGAGUCAUCACUCAGCACCAGGAUAUUGUUGGAGAGGACAG	2.18237	5.91742	129.22	6.06907e-30	1.01296e-28
hsa-mir-657	MI0003681	Chr17	81125276	81125373	-	GUGUAGUAGAGCUAGGAGGAGAGGGUCCUGGAGAAGCGUGGACCGGUCCGGGUGGGUUCCGGCAGGUUCUCACCCUCUCUAGGCCCCAUUCUCCUCUG	#N/A	#N/A	#N/A	#N/A	#N/A
hsa-mir-371a	MI0000779	Chr19	53787675	53787741	+	GUGGCACUCAAACUGUGGGGGCACUUUCUGCUCUCUGGUGAAAGUGCCGCCAUCUUUUGAGUGUUAC	#N/A	#N/A	#N/A	#N/A	#N/A
hsa-mir-371b	MI0017393	Chr19	53787677	53787742	-	GGUAACACUCAAAAGAUGGCGGCACUUUCACCAGAGAGCAGAAAGUGCCCCCACAGUUUGAGUGCC	#N/A	#N/A	#N/A	#N/A	#N/A
hsa-mir-372	MI0000780	Chr19	53787890	53787956	+	GUGGGCCUCAAAUGUGGAGCACUAUUCUGAUGUCCAAGUGGAAAGUGCUGCGACAUUUGAGCGUCAC	#N/A	#N/A	#N/A	#N/A	#N/A
hsa-mir-373	MI0000781	Chr19	53788705	53788773	+	GGGAUACUCAAAAUGGGGGCGCUUUCCUUUUUGUCUGUACUGGGAAGUGCUUCGAUUUUGGGGUGUCCC	#N/A	#N/A	#N/A	#N/A	#N/A
hsa-mir-23b	MI0000439	Chr9	95085208	95085304	+	CUCAGGUGCUCUGGCUGCUUGGGUUCCUGGCAUGCUGAUUUGUGACUUAAGAUUAAAAUCACAUUGCCAGGGAUUACCACGCAACCACGACCUUGGC	#N/A	#N/A	#N/A	#N/A	#N/A
hsa-mir-27b	MI0000440	Chr9	95085445	95085541	+	ACCUCUCUAACAAGGUGCAGAGCUUAGCUGAUUGGUGAACAGUGAUUGGUUUCCGCUUUGUUCACAGUGGCUAAGUUCUGCACCUGAAGAGAAGGUG	#N/A	#N/A	#N/A	#N/A	#N/A
hsa-mir-3074	MI0014181	Chr9	95086014	95086094	-	GCUCGACUCCUGUUCCUGCUGAACUGAGCCAGUGUGUAAAAUGAGAACUGAUAUCAGCUCAGUAGGCACCGGAGGGCGGGU	#N/A	#N/A	#N/A	#N/A	#N/A
hsa-mir-24-1	MI0000080	Chr9	95086021	95086088	+	CUCCGGUGCCUACUGAGCUGAUAUCAGUUCUCAUUUUACACACUGGCUCAGUUCAGCAGGAACAGGAG	#N/A	#N/A	#N/A	#N/A	#N/A
hsa-mir-508	MI0003195	ChrX	147236913	147237027	-	CCACCUUCAGCUGAGUGUAGUGCCCUACUCCAGAGGGCGUCACUCAUGUAAACUAAAACAUGAUUGUAGCCUUUUGGAGUAGAGUAAUACACAUCACGUAACGCAUAUUUGGUGG	#N/A	#N/A	#N/A	#N/A	#N/A
hsa-mir-507	MI0003194	ChrX	147230984	147231077	-	GUGCUGUGUGUAGUGCUUCACUUCAAGAAGUGCCAUGCAUGUGUCUAGAAAUAUGUUUUGCACCUUUUGGAGUGAAAUAAUGCACAACAGAUAC	#N/A	#N/A	#N/A	#N/A	#N/A
hsa-mir-506	MI0003193	ChrX	147230720	147230843	-	GCCACCACCAUCAGCCAUACUAUGUGUAGUGCCUUAUUCAGGAAGGUGUUACUUAAUAGAUUAAUAUUUGUAAGGCACCCUUCUGAGUAGAGUAAUGUGCAACAUGGACAACAUUUGUGGUGGC	1.64863	-0.453243	20.392	6.30939e-06	2.02885e-05
hsa-mir-513a-2	MI0003192	ChrX	147225826	147225952	-	GGAUGCCACAUUCAGCCAUUCAGUGUGCAGUGCCUUUCACAGGGAGGUGUCAUUUAUGUGAACUAAAAUAUAAAUUUCACCUUUCUGAGAAGGGUAAUGUACAGCAUGCACUGCAUAUGUGGUGUCC	#N/A	#N/A	#N/A	#N/A	#N/A
hsa-mir-509-1	MI0003196	ChrX	147260532	147260625	-	CAUGCUGUGUGUGGUACCCUACUGCAGACAGUGGCAAUCAUGUAUAAUUAAAAAUGAUUGGUACGUCUGUGGGUAGAGUACUGCAUGACACAUG	#N/A	#N/A	#N/A	#N/A	#N/A
hsa-mir-509-3	MI0005717	ChrX	147259652	147259726	-	GUGGUACCCUACUGCAGACGUGGCAAUCAUGUAUAAUUAAAAAUGAUUGGUACGUCUGUGGGUAGAGUACUGCAU	#N/A	#N/A	#N/A	#N/A	#N/A
hsa-mir-509-2	MI0005530	ChrX	147258760	147258850	-	CAUGCUGUGUGUGGUACCCUACUGCAGACAGUGGCAAUCAUGUAUAAUUAAAAAUGAUUGGUACGUCUGUGGGUAGAGUACUGCAUGACAC	#N/A	#N/A	#N/A	#N/A	#N/A
hsa-mir-514b	MI0014251	ChrX	147250151	147250230	-	CAUGUGGUACUCUUCUCAAGAGGGAGGCAAUCAUGUGUAAUUAGAUAUGAUUGACACCUCUGUGAGUGGAGUAACACAUG	#N/A	#N/A	#N/A	#N/A	#N/A
hsa-mir-514a-3	MI0003200	ChrX	147284641	147284728	-	GUUGUCUGUGGUACCCUACUCUGGAGAGUGACAAUCAUGUAUAACUAAAUUUGAUUGACACUUCUGUGAGUAGAGUAACGCAUGACAC	#N/A	#N/A	#N/A	#N/A	#N/A
hsa-mir-514a-2	MI0003199	ChrX	147281943	147282030	-	GUUGUCUGUGGUACCCUACUCUGGAGAGUGACAAUCAUGUAUAACUAAAUUUGAUUGACACUUCUGUGAGUAGAGUAACGCAUGACAC	#N/A	#N/A	#N/A	#N/A	#N/A
hsa-mir-514a-1	MI0003198	ChrX	147279247	147279344	-	AACAUGUUGUCUGUGGUACCCUACUCUGGAGAGUGACAAUCAUGUAUAAUUAAAUUUGAUUGACACUUCUGUGAGUAGAGUAACGCAUGACACGUACG	#N/A	#N/A	#N/A	#N/A	#N/A
hsa-mir-510	MI0003197	ChrX	147272335	147272408	-	GUGGUGUCCUACUCAGGAGAGUGGCAAUCACAUGUAAUUAGGUGUGAUUGAAACCUCUAAGAGUGGAGUAACAC	#N/A	#N/A	#N/A	#N/A	#N/A
hsa-mir-200b	MI0000342	Chr1	1167104	1167198	+	CCAGCUCGGGCAGCCGUGGCCAUCUUACUGGGCAGCAUUGGAUGGAGUCAGGUCUCUAAUACUGCCUGGUAAUGAUGACGGCGGAGCCCUGCACG	1.68513	9.52393	194.551	3.228e-44	9.62906e-43
hsa-mir-200a	MI0000737	Chr1	1167863	1167952	+	CCGGGCCCCUGUGAGCAUCUUACCGGACAGUGCUGGAUUUCCCAGCUUGACUCUAACACUGUCUGGUAACGAUGUUCAAAGGUGACCCGC	2.0948	9.90547	295.558	3.05817e-66	1.47847e-64
hsa-mir-429	MI0001641	Chr1	1169005	1169087	+	CGCCGGCCGAUGGGCGUCUUACCAGACAUGGUUAGACCUGGCCCUCUGUCUAAUACUGUCUGGUAAAACCGUCCAUCCGCUGC	2.72373	7.06483	301.401	1.63172e-67	8.17027e-66
hsa-mir-199a-2	MI0000281	Chr1	172144535	172144644	-	AGGAAGCUUCUGGAGAUCCUGCUCCGUCGCCCCAGUGUUCAGACUACCUGUUCAGGACAAUGCCGUUGUACAGUAGUCUGCACAUUGGUUAGACUGGGCAAGGGAGAGCA	#N/A	#N/A	#N/A	#N/A	#N/A
hsa-mir-3120	MI0014136	Chr1	172138808	172138888	+	GUCAUGUGACUGCCUGUCUGUGCCUGCUGUACAGGUGAGCGGAUGUUCUGCACAGCAAGUGUAGACAGGCAGACACAUGAC	#N/A	#N/A	#N/A	#N/A	#N/A
hsa-mir-214	MI0000290	Chr1	172138798	172138907	-	GGCCUGGCUGGACAGAGUUGUCAUGUGUCUGCCUGUCUACACUUGCUGUGCAGAACAUCCGCUCACCUGUACAGCAGGCACAGACAGGCAGUCACAUGACAACCCAGCCU	#N/A	#N/A	#N/A	#N/A	#N/A
hsa-mir-100	MI0000102	Chr11	122152229	122152308	-	CCUGUUGCCACAAACCCGUAGAUCCGAACUUGUGGUAUUAGUCCGCACAAGCUUGUAUCUAUAGGUAUGUGUCUGUUAGG	-1.83144	11.8528	459.477	6.2489e-102	4.3805e-100
hsa-mir-10526	MI0033673	Chr11	122152103	122152156	-	UCCCCUUAGUUUCCUUUAAGAGUGAUAAAAAUGGAAAAGGGGGCUGAGGUGGAG	#N/A	#N/A	#N/A	#N/A	#N/A
hsa-let-7a-2	MI0000061	Chr11	122146522	122146593	-	AGGUUGAGGUAGUAGGUUGUAUAGUUUAGAAUUACAUCAAGGGAGAUAACUGUACAGCCUCCUAGCUUUCCU	#N/A	#N/A	#N/A	#N/A	#N/A
hsa-mir-1179	MI0006272	Chr15	88608107	88608197	+	GGCUGGAAAGGAAGAAGCAUUCUUUCAUUGGUUGGUGUGUAUUGCCUUGUCAACCAAUAAGAGGAUGCCAUUUAUCCUUUUCUGACUAGCU	#N/A	#N/A	#N/A	#N/A	#N/A
hsa-mir-7-2	MI0000264	Chr15	88611825	88611934	+	CUGGAUACAGAGUGGACCGGCUGGCCCCAUCUGGAAGACUAGUGAUUUUGUUGUUGUCUUACUGCGCUCAACAACAAAUCCCAGUCUACCUAAUGGUGCCAGCCAUCGCA	1.03136	0.794011	19.6258	9.41891e-06	2.98763e-05
hsa-mir-3529	MI0017351	Chr15	88611847	88611924	-	GGCACCAUUAGGUAGACUGGGAUUUGUUGUUGAGCGCAGUAAGACAACAACAAAAUCACUAGUCUUCCAGAUGGGGCC	#N/A	#N/A	#N/A	#N/A	#N/A
hsa-mir-3677	MI0016078	Chr16	2270713	2270772	+	GGCAGUGGCCAGAGCCCUGCAGUGCUGGGCAUGGGCUUCUCGUGGGCUCUGGCCACGGCC	2.18694	3.82643	134.524	4.19595e-31	7.84363e-30
hsa-mir-940	MI0005762	Chr16	2271747	2271840	+	GUGAGGUGUGGGCCCGGCCCCAGGAGCGGGGCCUGGGCAGCCCCGUGUGUUGAGGAAGGAAGGCAGGGCCCCCGCUCCCCGGGCCUGACCCCAC	2.13298	2.67269	119.292	9.03839e-28	1.34807e-26
hsa-mir-4717	MI0017352	Chr16	2274620	2274691	+	GGCAGUGUUUAGGCCACAGCCACCCAUGUGUAGGGGUGGCUACACAUGGGUGGCUGUGGCCUAAACACUGCC	#N/A	#N/A	#N/A	#N/A	#N/A
hsa-mir-3179-1	MI0014213	Chr16	14901508	14901591	+	CAGGAUCACAGACGUUUAAAUUACACUCCUUCUGCUGUGCCUUACAGCAGUAGAAGGGGUGAAAUUUAAACGUCUGUGAUCCUG	#N/A	#N/A	#N/A	#N/A	#N/A
hsa-mir-3670-1	MI0016071	Chr16	14907717	14907781	+	UCUAGACUGGUAUAGCUGCUUUUGGAGCCUCACCUGCUGAGAGCUCACAGCUGUCCUUCUCUAGA	#N/A	#N/A	#N/A	#N/A	#N/A
hsa-mir-3180-1	MI0014214	Chr16	14911220	14911313	+	CAGUGCGACGGGCGGAGCUUCCAGACGCUCCGCCCCACGUCGCAUGCGCCCCGGGAAAGCGUGGGGCGGAGCUUCCGGAGGCCCCGCCCUGCUG	#N/A	#N/A	#N/A	#N/A	#N/A
hsa-mir-3179-2	MI0014216	Chr16	16300159	16300242	+	CAGGAUCACAGACGUUUAAAUUACACUCCUUCUGCUGUGCCUUACAGCAGUAGAAGGGGUGAAAUUUAAACGUCUGUGAUCCUG	#N/A	#N/A	#N/A	#N/A	#N/A
hsa-mir-3670-2	MI0019112	Chr16	16306370	16306434	+	UCUAGACUGGUAUAGCUGCUUUUGGAGCCUCACCUGCUGAGAGCUCACAGCUGUCCUUCUCUAGA	#N/A	#N/A	#N/A	#N/A	#N/A
hsa-mir-3180-2	MI0014215	Chr16	16309879	16309966	+	GCGACGGGCGGAGCUUCCAGACGCUCCGCCCCACGUCGCAUGCGCCCCGGGAAAGCGUGGGGCGGAGCUUCCGGAGGCCCCGCCCUGC	#N/A	#N/A	#N/A	#N/A	#N/A
hsa-mir-3179-3	MI0014221	Chr16	18411894	18411977	-	CAGGAUCACAGACGUUUAAAUUACACUCCUUCUGCUGUGCCUUACAGCAGUAGAAGGGGUGAAAUUUAAACGUCUGUGAUCCUG	#N/A	#N/A	#N/A	#N/A	#N/A
hsa-mir-3670-3	MI0031513	Chr16	18405698	18405762	-	UCUAGACUGGUAUAGCUGCUUUUGGAGCCUCACCUGCUGAGAGCUCACAGCUGUCCUUCUCUAGA	#N/A	#N/A	#N/A	#N/A	#N/A
hsa-mir-3180-3	MI0014217	Chr16	18402178	18402271	-	CAGUGCGACGGGCGGAGCUUCCAGACGCUCCGCCCCACGUCGCAUGCGCCCCGGGAAAGCGUGGGGCGGAGCUUCCGGAGGCCCCGCCCUGCUG	#N/A	#N/A	#N/A	#N/A	#N/A
hsa-mir-23a	MI0000079	Chr19	13836587	13836659	-	GGCCGGCUGGGGUUCCUGGGGAUGGGAUUUGCUUCCUGUCACAAAUCACAUUGCCAGGGAUUUCCAACCGACC	#N/A	#N/A	#N/A	#N/A	#N/A
hsa-mir-27a	MI0000085	Chr19	13836440	13836517	-	CUGAGGAGCAGGGCUUAGCUGCUUGUGAGCAGGGUCCACACCAAGUCGUGUUCACAGUGGCUAAGUUCCGCCCCCCAG	#N/A	#N/A	#N/A	#N/A	#N/A
hsa-mir-24-2	MI0000081	Chr19	13836287	13836359	-	CUCUGCCUCCCGUGCCUACUGAGCUGAAACACAGUUGGUUUGUGUACACUGGCUCAGUUCAGCAGGAACAGGG	#N/A	#N/A	#N/A	#N/A	#N/A
hsa-mir-99b	MI0000746	Chr19	51692612	51692681	+	GGCACCCACCCGUAGAACCGACCUUGCGGGGCCUUCGCCGCACACAAGCUCGUGUCUGUGGGUCCGUGUC	#N/A	#N/A	#N/A	#N/A	#N/A
hsa-let-7e	MI0000066	Chr19	51692786	51692864	+	CCCGGGCUGAGGUAGGAGGUUGUAUAGUUGAGGAGGACACCCAAGGAGAUCACUAUACGGCCUCCUAGCUUUCCCCAGG	#N/A	#N/A	#N/A	#N/A	#N/A
hsa-mir-125a	MI0000469	Chr19	51693254	51693339	+	UGCCAGUCUCUAGGUCCCUGAGACCCUUUAACCUGUGAGGACAUCCAGGGUCACAGGUGAGGUUCUUGGGAGCCUGGCGUCUGGCC	#N/A	#N/A	#N/A	#N/A	#N/A
hsa-mir-6803	MI0022648	Chr19	55245186	55245250	-	CUCCUCUGGGGGUGGGGGGCUGGGCGUGGUGGACAGCGAUGCAUCCCUCGCCUUCUCACCCUCAG	#N/A	#N/A	#N/A	#N/A	#N/A
hsa-mir-6802	MI0022647	Chr19	55239912	55239976	-	GAGGGCUAGGUGGGGGGCUUGAAGCCCCGAGAUGCCUCACGUCUUCACCCCUCUCACCUAAGCAG	#N/A	#N/A	#N/A	#N/A	#N/A
hsa-mir-6804	MI0022649	Chr19	55230885	55230952	-	GGAUGUGAGGGUGUCAGCAGGUGACGGUGGGGGCCACGCUGACAGCCGCACCUGCCUCUCACCCACAG	#N/A	#N/A	#N/A	#N/A	#N/A
hsa-mir-6724-1	MI0022559	Chr21	8205315	8205406	+	CGCUGCGCUUCUGGGCCCGCGGCGGGCGUGGGGCUGCCCGGGCCGGUCGACCAGCGCGCCGUAGCUCCCGAGGCCCGAGCCGCGACCCGCGG	#N/A	#N/A	#N/A	#N/A	#N/A
hsa-mir-10401	MI0033425	Chr21	8206563	8206618	+	CGUGUGGGAAGGCGUGGGGUGCGGACCCCGGCCCGACCUCGCCGUCCCGCCCGCCG	#N/A	#N/A	#N/A	#N/A	#N/A
hsa-mir-10401	MI0033425	Chr21	8250772	8250827	+	CGUGUGGGAAGGCGUGGGGUGCGGACCCCGGCCCGACCUCGCCGUCCCGCCCGCCG	#N/A	#N/A	#N/A	#N/A	#N/A
hsa-mir-10401	MI0033425	Chr21	8389610	8389665	+	CGUGUGGGAAGGCGUGGGGUGCGGACCCCGGCCCGACCUCGCCGUCCCGCCCGCCG	#N/A	#N/A	#N/A	#N/A	#N/A
hsa-mir-10401	MI0033425	Chr21	8433797	8433852	+	CGUGUGGGAAGGCGUGGGGUGCGGACCCCGGCCCGACCUCGCCGUCCCGCCCGCCG	#N/A	#N/A	#N/A	#N/A	#N/A
hsa-mir-3648-1	MI0016048	Chr21	8208473	8208652	+	CGCGACUGCGGCGGCGGUGGUGGGGGGAGCCGCGGGGAUCGCCGAGGGCCGGUCGGCCGCCCCGGGUGCCGCGCGGUGCCGCCGGCGGCGGUGAGGCCCCGCGCGUGUGUCCCGGCUGCGGUCGGCCGCGCUCGAGGGGUCCCCGUGGCGUCCCCUUCCCCGCCGGCCGCCUUUCUCGCG	#N/A	#N/A	#N/A	#N/A	#N/A
hsa-mir-6724-4	MI0031518	Chr21	8432530	8432621	+	CGCUGCGCUUCUGGGCCCGCGGCGGGCGUGGGGCUGCCCGGGCCGGUCGACCAGCGCGCCGUAGCUCCCGAGGCCCGAGCCGCGACCCGCGG	#N/A	#N/A	#N/A	#N/A	#N/A
hsa-mir-10401	MI0033425	Chr21	8206563	8206618	+	CGUGUGGGAAGGCGUGGGGUGCGGACCCCGGCCCGACCUCGCCGUCCCGCCCGCCG	#N/A	#N/A	#N/A	#N/A	#N/A
hsa-mir-10401	MI0033425	Chr21	8250772	8250827	+	CGUGUGGGAAGGCGUGGGGUGCGGACCCCGGCCCGACCUCGCCGUCCCGCCCGCCG	#N/A	#N/A	#N/A	#N/A	#N/A
hsa-mir-10401	MI0033425	Chr21	8389610	8389665	+	CGUGUGGGAAGGCGUGGGGUGCGGACCCCGGCCCGACCUCGCCGUCCCGCCCGCCG	#N/A	#N/A	#N/A	#N/A	#N/A
hsa-mir-10401	MI0033425	Chr21	8433797	8433852	+	CGUGUGGGAAGGCGUGGGGUGCGGACCCCGGCCCGACCUCGCCGUCCCGCCCGCCG	#N/A	#N/A	#N/A	#N/A	#N/A
hsa-mir-10396b	MI0033426	Chr21	8436324	8436374	+	CGGCGGGGCUCGGAGCCGGGCUUCGGCCGGGCCCCGGGCCCUCGACCGGAC	#N/A	#N/A	#N/A	#N/A	#N/A
hsa-let-7a-3	MI0000062	Chr22	46112749	46112822	+	GGGUGAGGUAGUAGGUUGUAUAGUUUGGGGCUCUGCCCUGCUAUGGGAUAACUAUACAAUCUACUGUCUUUCCU	#N/A	#N/A	#N/A	#N/A	#N/A
hsa-mir-4763	MI0017404	Chr22	46113566	46113657	+	CCUGUCCCUCCUGCCCUGCGCCUGCCCAGCCCUCCUGCUCUGGUGACUGAGGACCGCCAGGCAGGGGCUGGUGCUGGGCGGGGGGCGGCGGG	#N/A	#N/A	#N/A	#N/A	#N/A
hsa-let-7b	MI0000063	Chr22	46113686	46113768	+	CGGGGUGAGGUAGUAGGUUGUGUGGUUUCAGGGCAGUGAUGUUGCCCCUCGGAAGAUAACUAUACAACCUACUGCCUUCCCUG	#N/A	#N/A	#N/A	#N/A	#N/A
hsa-mir-449c	MI0003823	Chr5	55172262	55172353	-	GCUGGGAUGUGUCAGGUAGGCAGUGUAUUGCUAGCGGCUGUUAAUGAUUUUAACAGUUGCUAGUUGCACUCCUCUCUGUUGCAUUCAGAAGC	4.53595	0.538431	54.0331	1.97138e-13	1.27957e-12
hsa-mir-449b	MI0003673	Chr5	55170646	55170742	-	UGACCUGAAUCAGGUAGGCAGUGUAUUGUUAGCUGGCUGCUUGGGUCAAGUCAGCAGCCACAACUACCCUGCCACUUGCUUCUGGAUAAAUUCUUCU	4.44929	1.3774	58.035	2.5749e-14	1.78713e-13
hsa-mir-449a	MI0001648	Chr5	55170532	55170622	-	CUGUGUGUGAUGAGCUGGCAGUGUAUUGUUAGCUGGUUGAAUAUGUGAAUGGCAUCGGCUAACAUGCAACUGCUGUCUUAUUGCAUAUACA	5.7264	3.60624	98.7552	2.85725e-23	3.31063e-22
hsa-mir-106b	MI0000734	Chr7	100093993	100094074	-	CCUGCCGGGGCUAAAGUGCUGACAGUGCAGAUAGUGGUCCUCUCCGUGCUACCGCACUGUGGGUACUUGCUGCUCCAGCAGG	#N/A	#N/A	#N/A	#N/A	#N/A
hsa-mir-93	MI0000095	Chr7	100093768	100093847	-	CUGGGGGCUCCAAAGUGCUGUUCGUGCAGGUAGUGUGAUUACCCAACCUACUGCUGAGCUAGCACUUCCCGAGCCCCCGG	1.20061	12.4202	130.532	3.13476e-30	5.35968e-29
hsa-mir-25	MI0000082	Chr7	100093560	100093643	-	GGCCAGUGUUGAGAGGCGGAGACUUGGGCAAUUGCUGGACGCUGCCCUGGGCAUUGCACUUGUCUCGGUCUGACAGUGCCGGCC	#N/A	#N/A	#N/A	#N/A	#N/A
hsa-mir-183	MI0000273	Chr7	129774905	129775014	-	CCGCAGAGUGUGACUCCUGUUCUGUGUAUGGCACUGGUAGAAUUCACUGUGAACAGUCUCAGUCAGUGAAUUACCGAAGGGCCAUAAACAGAGCAGAGACAGAUCCACGA	2.97169	14.0912	482.306	6.7279e-107	5.2403e-105
hsa-mir-96	MI0000098	Chr7	129774692	129774769	-	UGGCCGAUUUUGGCACUAGCACAUUUUUGCUUGUGUCUCUCCGCUCUGAGCAAUCAUGUGCAGUGCCAAUAUGGGAAA	3.23627	5.33241	477.994	5.8366e-106	4.3068e-104
hsa-mir-182	MI0000272	Chr7	129770383	129770492	-	GAGCUGCUUGCCUCCCCCCGUUUUUGGCAAUGGUAGAACUCACACUGGUGAGGUAACAGGAUCCGGUGGUUCUAGACUUGCCAACUAUGGGGCGAGGACUCAGCCGGCAC	2.3061	15.4608	374.669	1.80154e-83	1.14807e-81
hsa-mir-5692a-2	MI0019298	Chr8	12719132	12719190	+	UACAAAUAAUACCACAGUGGGUGUACCUCAUGUGUGUACACCCUGUGAUAUUAUUUGUA	#N/A	#N/A	#N/A	#N/A	#N/A
hsa-mir-3926-1	MI0016434	Chr8	12727232	12727304	-	AAAAUGGAGCUGGCCAAAAAGCAGGCAGAGACUUUAAAAGCGUCUCUGCCUGCUUUUUGGCCAGCUCCGUUUU	#N/A	#N/A	#N/A	#N/A	#N/A
hsa-mir-3926-2	MI0016437	Chr8	12727237	12727299	+	GGAGCUGGCCAAAAAGCAGGCAGAGACGCUUUUAAAGUCUCUGCCUGCUUUUUGGCCAGCUCC	#N/A	#N/A	#N/A	#N/A	#N/A
hsa-mir-6849	MI0022695	Chr8	144400277	144400345	-	CCUGGGAGUGGAUAGGGGAGUGUGUGGAGAGAGCACUGAGCCUGCCCACCAGCCUGUGUCCACCUCCAG	#N/A	#N/A	#N/A	#N/A	#N/A
hsa-mir-1234	MI0006324	Chr8	144400086	144400165	-	GUGAGUGUGGGGUGGCUGGGGCGGGGGGGGCCCGGGGACGGCUUGGGCCUGCCUAGUCGGCCUGACCACCCACCCCACAG	#N/A	#N/A	#N/A	#N/A	#N/A
hsa-mir-939	MI0005761	Chr8	144394149	144394230	-	UGUGGGCAGGGCCCUGGGGAGCUGAGGCUCUGGGGGUGGCCGGGGCUGACCCUGGGCCUCUGCUCCCCAGUGUCUGACCGCG	1.04473	0.893843	44.3387	2.76196e-11	1.587e-10
hsa-let-7a-1	MI0000060	Chr9	94175957	94176036	+	UGGGAUGAGGUAGUAGGUUGUAUAGUUUUAGGGUCACACCCACCACUGGGAGAUAACUAUACAAUCUACUGUCUUUCCUA	#N/A	#N/A	#N/A	#N/A	#N/A
hsa-let-7f-1	MI0000067	Chr9	94176347	94176433	+	UCAGAGUGAGGUAGUAGAUUGUAUAGUUGUGGGGUAGUGAUUUUACCCUGUUCAGGAGAUAACUAUACAAUCUAUUGCCUUCCCUGA	#N/A	#N/A	#N/A	#N/A	#N/A
hsa-let-7d	MI0000065	Chr9	94178834	94178920	+	CCUAGGAAGAGGUAGUAGGUUGCAUAGUUUUAGGGCAGGGAUUUUGCCCACAAGGAGGUAACUAUACGACCUGCUGCCUUUCUUAGG	#N/A	#N/A	#N/A	#N/A	#N/A
hsa-mir-374c	MI0016684	ChrX	74218549	74218618	+	ACACGGACAAUGAUAAUACAACCUGCUAAGUGCUAGGACACUUAGCAGGUUGUAUUAUAUCCAUCCGAGU	#N/A	#N/A	#N/A	#N/A	#N/A
hsa-mir-374b	MI0005566	ChrX	74218547	74218618	-	ACUCGGAUGGAUAUAAUACAACCUGCUAAGUGUCCUAGCACUUAGCAGGUUGUAUUAUCAUUGUCCGUGUCU	#N/A	#N/A	#N/A	#N/A	#N/A
hsa-mir-421	MI0003685	ChrX	74218377	74218461	-	GCACAUUGUAGGCCUCAUUAAAUGUUUGUUGAAUGAAAAAAUGAAUCAUCAACAGACAUUAAUUGGGCGCCUGCUCUGUGAUCUC	1.02631	1.78887	63.466	1.63162e-15	1.21678e-14
hsa-mir-105-2	MI0000112	ChrX	152394412	152394492	-	UGUGCAUCGUGGUCAAAUGCUCAGACUCCUGUGGUGGCUGCUUAUGCACCACGGAUGUUUGAGCAUGUGCUAUGGUGUCUA	6.01778	4.13654	62.4988	2.6661e-15	1.957e-14
hsa-mir-767	MI0003763	ChrX	152393421	152393529	-	GCUUUUAUAUUGUAGGUUUUUGCUCAUGCACCAUGGUUGUCUGAGCAUGCAGCAUGCUUGUCUGCUCAUACCCCAUGGUUUCUGAGCAGGAACCUUCAUUGUCUACUGC	6.12184	3.64905	67.0791	2.60835e-16	2.0723e-15
hsa-mir-105-1	MI0000111	ChrX	152392219	152392299	-	UGUGCAUCGUGGUCAAAUGCUCAGACUCCUGUGGUGGCUGCUCAUGCACCACGGAUGUUUGAGCAUGUGCUACGGUGUCUA	6.04045	4.12072	70.2736	5.1624e-17	4.23257e-16
hsa-mir-30e	MI0000749	Chr1	40754355	40754446	+	GGGCAGUCUUUGCUACUGUAAACAUCCUUGACUGGAAGCUGUAAGGUGUUCAGAGGAGCUUUCAGUCGGAUGUUUACAGCGGCAGGCUGCCA	#N/A	#N/A	#N/A	#N/A	#N/A
hsa-mir-30c-1	MI0000736	Chr1	40757284	40757372	+	ACCAUGCUGUAGUGUGUGUAAACAUCCUACACUCUCAGCUGUGAGCUCAAGGUGGCUGGGAGAGGGUUGUUUACUCCUUCUGCCAUGGA	#N/A	#N/A	#N/A	#N/A	#N/A
hsa-mir-4421	MI0016758	Chr1	51059837	51059905	+	CUGGGUCUCCUUUCUGCUGAGAGUUGAACACUUGUUGGGACAACCUGUCUGUGGAAAGGAGCUACCUAC	-1.33166	-0.693042	34.2262	4.90627e-09	2.26269e-08
hsa-mir-6500	MI0022211	Chr1	51060018	51060103	+	CCUGCCUGCAGAAAGGAGCUAUCCACUCCAGGUGUCCUUUCUUCUGAGAGCUGGACACUUGUUGGGAUGACCUGCCUGCAGGUAGG	#N/A	#N/A	#N/A	#N/A	#N/A
hsa-mir-3116-1	MI0014128	Chr1	62078786	62078859	+	CUUUAUUGAGUCCCUACUAUGUUCCAGGCACUGGGUAUCGUAGGUGCCUGGAACAUAGUAGGGACUCAAUAAAG	#N/A	#N/A	#N/A	#N/A	#N/A
hsa-mir-3116-2	MI0014129	Chr1	62078789	62078856	-	UAUUGAGUCCCUACUAUGUUCCAGGCACCUACGAUACCCAGUGCCUGGAACAUAGUAGGGACUCAAUA	#N/A	#N/A	#N/A	#N/A	#N/A
hsa-mir-101-1	MI0000103	Chr1	65058434	65058508	-	UGCCCUGGCUCAGUUAUCACAGUGCUGAUGCUGUCUAUUCUAAAGGUACAGUACUGUGAUAACUGAAGGAUGGCA	#N/A	#N/A	#N/A	#N/A	#N/A
hsa-mir-3671	MI0016072	Chr1	65057755	65057842	-	AUGUUAUUGCUGCUGCUGUCACAUUUACAUGAAAAUAAAAUGUAAAUUAUUUUAUUUCUAUCAAAUAAGGACUAGUCUGCAGUGAUAU	#N/A	#N/A	#N/A	#N/A	#N/A
hsa-mir-137	MI0000454	Chr1	98046070	98046171	-	GGUCCUCUGACUCUCUUCGGUGACGGGUAUUCUUGGGUGGAUAAUACGGAUUACGUUGUUAUUGCUUAAGAAUACGCGUAGUCGAGGAGAGUACCAGCGGCA	2.74237	0.340481	33.371	7.61514e-09	3.44401e-08
hsa-mir-2682	MI0012063	Chr1	98045242	98045351	-	ACCUUCCUGAAAGAGGUUGGGGCAGGCAGUGACUGUUCAGACGUCCAAUCUCUUUGGGACGCCUCUUCAGCGCUGUCUUCCCUGCCUCUGCCUUUAGGACGAGUCUCAAA	#N/A	#N/A	#N/A	#N/A	#N/A
hsa-mir-3119-1	MI0014134	Chr1	170151378	170151462	-	AUUAACUCUGGCUUUUAACUUUGAUGGCAAAGGGGUAGCUAAACAAUCUAUGUCUUUGCCAUCAAAGUUAAAAGCCAUAGUUAAU	#N/A	#N/A	#N/A	#N/A	#N/A
hsa-mir-3119-2	MI0014135	Chr1	170151378	170151462	+	AUUAACUAUGGCUUUUAACUUUGAUGGCAAAGACAUAGAUUGUUUAGCUACCCCUUUGCCAUCAAAGUUAAAAGCCAGAGUUAAU	#N/A	#N/A	#N/A	#N/A	#N/A
hsa-mir-1295b	MI0019146	Chr1	171101739	171101798	+	CACCCAGAUCUGCGGCCUAAUCACAGGCCACAUUUCUGAAUAGGCCACGGAUCUGGGCAA	1.73764	-0.294799	11.3269	0.000763919	0.00182145
hsa-mir-1295a	MI0006357	Chr1	171101728	171101806	-	AGGACAUUUUGCCCAGAUCCGUGGCCUAUUCAGAAAUGUGGCCUGUGAUUAGGCCGCAGAUCUGGGUGAAAUGUCCUCC	-1.18262	0.882718	64.0713	1.19996e-15	9.14317e-15
hsa-mir-181a-1	MI0000289	Chr1	198859044	198859153	-	UGAGUUUUGAGGUUGCUUCAGUGAACAUUCAACGCUGUCGGUGAGUUUGGAAUUAAAAUCAAAACCAUCGACCGUUGAUUGUACCCUAUGGCUAACCAUCAUCUACUCCA	#N/A	#N/A	#N/A	#N/A	#N/A
hsa-mir-181b-1	MI0000270	Chr1	198858873	198858982	-	CCUGUGCAGAGAUUAUUUUUUAAAAGGUCACAAUCAACAUUCAUUGCUGUCGGUGGGUUGAACUGUGUGGACAAGCUCACUGAACAAUGAAUGCAACUGUGGCCCCGCUU	1.41398	7.76671	150.992	1.05246e-34	2.37991e-33
hsa-mir-29b-2	MI0000107	Chr1	207802443	207802523	-	CUUCUGGAAGCUGGUUUCACAUGGUGGCUUAGAUUUUUCCAUCUUUGUAUCUAGCACCAUUUGAAAUCAGUGUUUUAGGAG	#N/A	#N/A	#N/A	#N/A	#N/A
hsa-mir-29c	MI0000735	Chr1	207801852	207801939	-	AUCUCUUACACAGGCUGACCGAUUUCUCCUGGUGUUCAGAGUCUGUUUUUGUCUAGCACCAUUUGAAAUCGGUUAUGAUGUAGGGGGA	#N/A	#N/A	#N/A	#N/A	#N/A
hsa-mir-194-1	MI0000488	Chr1	220118157	220118241	-	AUGGUGUUAUCAAGUGUAACAGCAACUCCAUGUGGACUGUGUACCAAUUUCCAGUGGAGAUGCUGUUACUUUUGAUGGUUACCAA	#N/A	#N/A	#N/A	#N/A	#N/A
hsa-mir-215	MI0000291	Chr1	220117853	220117962	-	AUCAUUCAGAAAUGGUAUACAGGAAAAUGACCUAUGAAUUGACAGACAAUAUAGCUGAGUUUGUCUGUCAUUUCUUUAGGCCAAUAUUCUGUAUGACUGUGCUACUUCAA	-1.16177	2.87005	94.3701	2.61713e-22	2.80092e-21
hsa-mir-3155a	MI0014183	Chr10	6152196	6152277	+	UCCGGGCAUCACCUCCCACUGCAGAGCCUGGGGAGCCGGACAGCUCCCUUCCCAGGCUCUGCAGUGGGAACUGAUGCCUGGA	#N/A	#N/A	#N/A	#N/A	#N/A
hsa-mir-3155b	MI0016839	Chr10	6152207	6152262	-	CCACUGCAGAGCCUGGGAAGGGAGCUGUCCGGCUCCCCAGGCUCUGCAGUGGGAGG	#N/A	#N/A	#N/A	#N/A	#N/A
hsa-mir-4679-1	MI0017310	Chr10	89063336	89063410	+	GUCUUUUUUCUGUGAUAGAGAUUCUUUGCUUUGUUAGAAACAAAAAGCAAAGAAUCUCUAUCACAGAAAAAAGAU	#N/A	#N/A	#N/A	#N/A	#N/A
hsa-mir-4679-2	MI0017311	Chr10	89063335	89063411	-	UAUCUUUUUUCUGUGAUAGAGAUUCUUUGCUUUUUGUUUCUAACAAAGCAAAGAAUCUCUAUCACAGAAAAAAGACG	#N/A	#N/A	#N/A	#N/A	#N/A
hsa-mir-3158-1	MI0014186	Chr10	101601417	101601497	+	AUUCAGGCCGGUCCUGCAGAGAGGAAGCCCUUCUGCUUACAGGUAUUGGAAGGGCUUCCUCUCUGCAGGACCGGCCUGAAU	#N/A	#N/A	#N/A	#N/A	#N/A
hsa-mir-3158-2	MI0014187	Chr10	101601417	101601497	-	AUUCAGGCCGGUCCUGCAGAGAGGAAGCCCUUCCAAUACCUGUAAGCAGAAGGGCUUCCUCUCUGCAGGACCGGCCUGAAU	#N/A	#N/A	#N/A	#N/A	#N/A
hsa-mir-6715a	MI0022548	Chr10	112299612	112299690	+	UGGGCUGCGUCCACAGGCACAGCCGGUUUGAGCAUUUUUACUGAAUUGCCAAACCAGUCGUGCCUGUGGGCACAACCUU	-2.4632	-0.0641816	119.118	9.86664e-28	1.45611e-26
hsa-mir-6715b	MI0022549	Chr10	112299612	112299688	-	GGUUGUGCCCACAGGCACGACUGGUUUGGCAAUUCAGUAAAAAUGCUCAAACCGGCUGUGCCUGUGGACGCAGCCCA	-1.88891	-0.636174	52.8697	3.56418e-13	2.28173e-12
hsa-mir-3160-2	MI0014190	Chr11	46451807	46451887	+	ACCUGCCCUGGGCUUUCUAGUCUCAGCUCUCCUGACCAGCUGAGCUGGAGGAGAGCUGAGACUAGAAAGCCCAGGGCAGGU	#N/A	#N/A	#N/A	#N/A	#N/A
hsa-mir-3160-1	MI0014189	Chr11	46451805	46451889	-	GGACCUGCCCUGGGCUUUCUAGUCUCAGCUCUCCUCCAGCUCAGCUGGUCAGGAGAGCUGAGACUAGAAAGCCCAGGGCAGGUUC	#N/A	#N/A	#N/A	#N/A	#N/A
hsa-mir-6748	MI0022593	Chr11	62789815	62789885	+	UGGUGUGUGGGUGGGAAGGACUGGAUUUGAAAUGGUCCCACUCCUGACGAUCCUGUCCCUGUCUCCUACAG	#N/A	#N/A	#N/A	#N/A	#N/A
hsa-mir-6514	MI0022226	Chr11	62792702	62792771	-	UAUGGAGUGGACUUUCAGCUGGCAUUUACGAGUCAGAGUUCUUACAGAGCUGCCUGUUCUUCCACUCCAG	#N/A	#N/A	#N/A	#N/A	#N/A
hsa-mir-7113	MI0022964	Chr11	68032864	68032922	+	CUCCAGGGAGACAGUGUGUGAGGCCUCUUGCCAUGGCCUCCCUGCCCGCCUCUCUGCAG	#N/A	#N/A	#N/A	#N/A	#N/A
hsa-mir-4691	MI0017324	Chr11	68033897	68033981	+	GGAGCACUCCCAGGUCCUCCAGGCCAUGAGCUGCGGCCCUGAUGUCUCUACUCCAGCCACGGACUGAGAGUGCAUAGGAGUGUCC	1.38011	-0.544247	20.7289	5.29107e-06	1.71318e-05
hsa-mir-34b	MI0000742	Chr11	111512938	111513021	+	GUGCUCGGUUUGUAGGCAGUGUCAUUAGCUGAUUGUACUGUGGUGGUUACAAUCACUAACUCCACUGCCAUCAAAACAAGGCAC	#N/A	#N/A	#N/A	#N/A	#N/A
hsa-mir-34c	MI0000743	Chr11	111513439	111513515	+	AGUCUAGUUACUAGGCAGUGUAGUUAGCUGAUUGCUAAUAGUACCAAUCACUAACCACACGGCCAGGUAAAAAGAUU	#N/A	#N/A	#N/A	#N/A	#N/A
hsa-mir-200c	MI0000650	Chr12	6963699	6963766	+	CCCUCGUCUUACCCAGCAGUGUUUGGGUGCGGUUGGGAGUCUCUAAUACUGCCGGGUAAUGAUGGAGG	1.52883	13.5211	208.85	2.44827e-47	8.17256e-46
hsa-mir-141	MI0000457	Chr12	6964097	6964191	+	CGGCCGGCCCUGGGUCCAUCUUCCAGUACAGUGUUGGAUGGUCUAAUUGUGAAGCUCCUAACACUGUCUGGUAAAGAUGGCUCCCGGGUGGGUUC	2.24244	10.9386	316.802	7.20284e-71	3.74014e-69
hsa-mir-6758	MI0022603	Chr12	57512688	57512750	+	UGGGCUAGAGAGGGGAAGGAUGUGAUGUGAGCAGAUGGUUCUCACUCAUUCUCCUCUGUCCAG	#N/A	#N/A	#N/A	#N/A	#N/A
hsa-mir-616	MI0003629	Chr12	57519163	57519259	-	UUAGGUAAUUCCUCCACUCAAAACCCUUCAGUGACUUCCAUGACAUGAAAUAGGAAGUCAUUGGAGGGUUUGAGCAGAGGAAUGACCUGUUUUAAAA	#N/A	#N/A	#N/A	#N/A	#N/A
hsa-mir-548c	MI0003630	Chr12	64622509	64622605	+	CAUUGGCAUCUAUUAGGUUGGUGCAAAAGUAAUUGCGGUUUUUGCCAUUACUUUCAGUAGCAAAAAUCUCAAUUACUUUUGCACCAACUUAAUACUU	#N/A	#N/A	#N/A	#N/A	#N/A
hsa-mir-548z	MI0016688	Chr12	64622509	64622605	-	AAGUAUUAAGUUGGUGCAAAAGUAAUUGAGAUUUUUGCUACUGAAAGUAAUGGCAAAAACCGCAAUUACUUUUGCACCAACCUAAUAGAUGCCAAUG	#N/A	#N/A	#N/A	#N/A	#N/A
hsa-mir-3913-2	MI0016418	Chr12	69584723	69584822	+	UGUCUAUAAUAAACUGAAAUAUUUGGGACUGAUCUUGAUGUCUGCCAAGGUUUUGGCAGACAUCAAGAUCAGUCCCAAAUAUUUCAGUUUAUUAUAAACA	#N/A	#N/A	#N/A	#N/A	#N/A
hsa-mir-3913-1	MI0016417	Chr12	69584722	69584823	-	UUGUUUAUAAUAAACUGAAAUAUUUGGGACUGAUCUUGAUGUCUGCCAAAACCUUGGCAGACAUCAAGAUCAGUCCCAAAUAUUUCAGUUUAUUAUAGACAG	#N/A	#N/A	#N/A	#N/A	#N/A
hsa-mir-5700	MI0019307	Chr12	94561789	94561859	+	UUAAUUAAUGCAUUAAAUUAUUGAAGGCCCUUGGGCACCCCAGGCCUUCAAUAAUUUAAUGCAUUUAUUGA	#N/A	#N/A	#N/A	#N/A	#N/A
hsa-mir-7844	MI0025514	Chr12	94571231	94571352	-	UGAUUGUGCGGACUCGUGUGUAAGAAAAACUAGGACUGUGUGGUGUAAAUAACUACAAUUCUCUUAACUCCGUAGCAGUUGCCAACUCAGUCCUUGUACUUCGUUAACACGAAUCUGUUUCA	#N/A	#N/A	#N/A	#N/A	#N/A
hsa-mir-331	MI0000812	Chr12	95308420	95308513	+	GAGUUUGGUUUUGUUUGGGUUUGUUCUAGGUAUGGUCCCAGGGAUCCCAGAUCAAACCAGGCCCCUGGGCCUAUCCUAGAACCAACCUAAGCUC	1.03899	5.28912	77.3404	1.43893e-18	1.30154e-17
hsa-mir-3685	MI0016086	Chr12	95309923	95309984	+	GUACAUUUCCUACCCUACCUGAAGACUUGAGAUUAUAGUCUUUGGGGGGAUGGGCAAAGUAC	#N/A	#N/A	#N/A	#N/A	#N/A
hsa-mir-15a	MI0000069	Chr13	50049119	50049201	-	CCUUGGAGUAAAGUAGCAGCACAUAAUGGUUUGUGGAUUUUGAAAAGGUGCAGGCCAUAUUGUGCUGCCUCAAAAAUACAAGG	#N/A	#N/A	#N/A	#N/A	#N/A
hsa-mir-16-1	MI0000070	Chr13	50048973	50049061	-	GUCAGCAGUGCCUUAGCAGCACGUAAAUAUUGGCGUUAAGAUUCUAAAAUUAUCUCCAGUAUUAACUGUGCUGCUGAAGUAAGGUUGAC	#N/A	#N/A	#N/A	#N/A	#N/A
hsa-mir-342	MI0000805	Chr14	100109655	100109753	+	GAAACUGGGCUCAAGGUGAGGGGUGCUAUCUGUGAUUGAGGGACAUGGUUAAUGGAAUUGUCUCACACAGAAAUCGCACCCGUCACCUUGGCCUACUUA	1.57787	8.99164	131.355	2.07103e-30	3.58467e-29
hsa-mir-151b	MI0003772	Chr14	100109419	100109514	-	ACCUCUGAUGUGUCAGUCUCUCUUCAGGGCUCCCGAGACACAGAAACAGACACCUGCCCUCGAGGAGCUCACAGUCUAGACAAACAAACCCAGGGU	#N/A	#N/A	#N/A	#N/A	#N/A
hsa-mir-203a	MI0000283	Chr14	104117405	104117514	+	GUGUUGGGGACUCGCGCGCUGGGUCCAGUGGUUCUUAACAGUUCAACAGUUCUGUAGCGCAAUUGUGAAAUGUUUAGGACCACUAGACCCGGCGGGCGCGGCGACAGCGA	2.18466	12.8387	118.619	1.26895e-27	1.8532e-26
hsa-mir-203b	MI0017343	Chr14	104117418	104117503	-	GCGCCCGCCGGGUCUAGUGGUCCUAAACAUUUCACAAUUGCGCUACAGAACUGUUGAACUGUUAAGAACCACUGGACCCAGCGCGC	2.5973	6.11265	104.118	1.90601e-24	2.38591e-23
hsa-mir-7973-1	MI0025748	Chr15	51314034	51314109	+	UGUGACCCUAGAAUAAUUACCCAACGUCUCUGAGUCUCGGUUUUGAGAGGGUGAGUAAUUAUUCUAGGGUCACACA	#N/A	#N/A	#N/A	#N/A	#N/A
hsa-mir-7973-2	MI0025749	Chr15	51314032	51314107	-	UGUGACCCUAGAAUAAUUACUCACCCUCUCAAAACCGAGACUCAGAGACGUUGGGUAAUUAUUCUAGGGUCACACA	#N/A	#N/A	#N/A	#N/A	#N/A
hsa-mir-5587	MI0019144	Chr16	535316	535368	+	AUGGUCACCUCCGGGACUCAGCCCUGUGCUGAGCCCCGGGCAGUGUGAUCAUC	#N/A	#N/A	#N/A	#N/A	#N/A
hsa-mir-3176	MI0014210	Chr16	543277	543366	+	UGGCCUCUCCAGUCUGCAGCUCCCGGCAGCCUCGGGCCACACUCCCGGGAUCCCCAGGGACUGGCCUGGGACUACCGGGGGUGGCGGCCG	2.1548	-0.319528	47.9488	4.37496e-12	2.63249e-11
hsa-mir-4516	MI0016882	Chr16	2133119	2133204	+	AGGGAGAAGGGUCGGGGCAGGGAGGGCAGGGCAGGCUCUGGGGUGGGGGGUCUGUGAGUCAGCCACGGCUCUGCCCACGUCUCCCC	#N/A	#N/A	#N/A	#N/A	#N/A
hsa-mir-3180-5	MI0016409	Chr16	2135977	2136129	-	GCUCCGCCCCACGUCGCAUGCGCCCCGGGAACGCGUGGGGCGGAGCUUCCGGAGGCCCCGCCCUGCUGCCGACCCUGUGGAGCGGAGGGUGAAGCCUCCGGAUGCCAGUCCCUCAUCGCUGGCCCGGUCGCGCUGUGGCGAAGGGGGCGGAGC	#N/A	#N/A	#N/A	#N/A	#N/A
hsa-mir-193b	MI0003137	Chr16	14303967	14304049	+	GUGGUCUCAGAAUCGGGGUUUUGAGGGCGAGAUGAGUUUAUGUUUUAUCCAACUGGCCCUCAAAGUCCCGCUUUUGGGGUCAU	#N/A	#N/A	#N/A	#N/A	#N/A
hsa-mir-365a	MI0000767	Chr16	14309285	14309371	+	ACCGCAGGGAAAAUGAGGGACUUUUGGGGGCAGAUGUGUUUCCAUUCCACUAUCAUAAUGCCCCUAAAAAUCCUUAUUGCUCUUGCA	-1.37051	6.92994	268.007	3.0854e-60	1.20159e-58
hsa-mir-6511a-1	MI0022223	Chr16	14925937	14926003	+	CCUGCAGGCAGAAGUGGGGCUGACAGGGCAGAGGGUUGCGCCCCCUCACCAUCCCUUCUGCCUGCAG	#N/A	#N/A	#N/A	#N/A	#N/A
hsa-mir-6770-1	MI0022615	Chr16	14930820	14930879	+	UAUCCUGAGAAGGCACAGCUUGCACGUGACCUCCUGGGCCUGGCGGCUGUGUCUUCACAG	#N/A	#N/A	#N/A	#N/A	#N/A
hsa-mir-6511a-2	MI0023564	Chr16	16324588	16324654	+	CCUGCAGGCAGAAGUGGGGCUGACAGGGCAGAGGGUUGCGCCCCCUCACCAUCCCUUCUGCCUGCAG	#N/A	#N/A	#N/A	#N/A	#N/A
hsa-mir-6770-2	MI0026418	Chr16	16329305	16329364	+	UAUCCUGAGAAGGCACAGCUUGCACGUGACCUCCUGGGCCUGGCGGCUGUGUCUUCACAG	#N/A	#N/A	#N/A	#N/A	#N/A
hsa-mir-3179-4	MI0031510	Chr16	18494493	18494576	-	CAGGAUCACAGACGUUUAAAUUACACUCCUUCUGCUGUGCCUUACAGCAGUAGAAGGGGUGAAAUUUAAACGUCUGUGAUCCUG	#N/A	#N/A	#N/A	#N/A	#N/A
hsa-mir-3670-4	MI0031514	Chr16	18488301	18488365	-	UCUAGACUGGUAUAGCUGCUUUUGGAGCCUCACCUGCUGAGAGCUCACAGCUGUCCUUCUCUAGA	#N/A	#N/A	#N/A	#N/A	#N/A
hsa-mir-212	MI0000288	Chr17	2050271	2050380	-	CGGGGCACCCCGCCCGGACAGCGCGCCGGCACCUUGGCUCUAGACUGCUUACUGCCCGGGCCGCCCUCAGUAACAGUCUCCAGUCACGGCCACCGACGCCUGGCCCCGCC	#N/A	#N/A	#N/A	#N/A	#N/A
hsa-mir-132	MI0000449	Chr17	2049908	2050008	-	CCGCCCCCGCGUCUCCAGGGCAACCGUGGCUUUCGAUUGUUACUGUGGGAACUGGAGGUAACAGUCUACAGCCAUGGUCGCCCCGCAGCACGCCCACGCGC	#N/A	#N/A	#N/A	#N/A	#N/A
hsa-mir-6865	MI0022712	Chr17	4970086	4970150	-	AUCCAUAGGUGGCAGAGGAGGGACUUCAGAUGCUUCAUGACACCCUCUUUCCCUACCGCCUACAG	#N/A	#N/A	#N/A	#N/A	#N/A
hsa-mir-6864	MI0022711	Chr17	4969702	4969771	-	GAAAGUUGAAGGGACAAGUCAGAUAUGCCAUUAUGUGGGUCAUGAGGUGGUGAGACUUCUCUCCCUUCAG	#N/A	#N/A	#N/A	#N/A	#N/A
hsa-mir-4520-2	MI0017358	Chr17	6655449	6655502	+	CCUGCGUGUUUUCUGUCCAAAUCCUUUUCUGAUUUGGACAGAAAACACGCAGGU	#N/A	#N/A	#N/A	#N/A	#N/A
hsa-mir-4520-1	MI0016886	Chr17	6655440	6655509	-	GUGUGCCACCUGCGUGUUUUCUGUCCAAAUCAGAAAAGGAUUUGGACAGAAAACACGCAGGAAGAAGGAA	#N/A	#N/A	#N/A	#N/A	#N/A
hsa-mir-497	MI0003138	Chr17	7017911	7018022	-	CCACCCCGGUCCUGCUCCCGCCCCAGCAGCACACUGUGGUUUGUACGGCACUGUGGCCACGUCCAAACCACACUGUGGUGUUAGAGCGAGGGUGGGGGAGGCACCGCCGAGG	-1.256	5.03097	228.246	1.43859e-51	5.17156e-50
hsa-mir-195	MI0000489	Chr17	7017615	7017701	-	AGCUUCCCUGGCUCUAGCAGCACAGAAAUAUUGGCACAGGGAAGCGAGUCUGCCAAUAUUGGCUGUGCUGCUCCAGGCAGGGUGGUG	-1.34982	5.81423	288.254	1.19404e-64	5.40013e-63
hsa-mir-33b	MI0003646	Chr17	17813836	17813931	-	GCGGGCGGCCCCGCGGUGCAUUGCUGUUGCAUUGCACGUGUGUGAGGCGGGUGCAGUGCCUCGGCAGUGCAGCCCGGAGCCGGCCCCUGGCACCAC	2.78874	3.26065	161.26	6.00357e-37	1.42661e-35
hsa-mir-6777	MI0022622	Chr17	17813480	17813545	-	UCAAGACGGGGAGUCAGGCAGUGGUGGAGAUGGAGAGCCCUGAGCCUCCACUCUCCUGGCCCCCAG	1.01544	0.179467	23.508	1.24396e-06	4.42647e-06
hsa-mir-423	MI0001445	Chr17	30117079	30117172	+	AUAAAGGAAGUUAGGCUGAGGGGCAGAGAGCGAGACUUUUCUAUUUUCCAAAAGCUCGGUCUGAGGCCCCUCAGUCUUGCUUCCUAACCCGCGC	#N/A	#N/A	#N/A	#N/A	#N/A
hsa-mir-3184	MI0014226	Chr17	30117086	30117160	-	AAGCAAGACUGAGGGGCCUCAGACCGAGCUUUUGGAAAAUAGAAAAGUCUCGCUCUCUGCCCCUCAGCCUAACUU	#N/A	#N/A	#N/A	#N/A	#N/A
hsa-mir-4725	MI0017362	Chr17	31575269	31575358	+	GUGUCUCUCUGGAGACCCUGCAGCCUUCCCACCCACCAGGGAGCUUUCCAUGGGCUGUGGGGAAGGCGUCAGUGUCGGGUGAGGGAACAC	#N/A	#N/A	#N/A	#N/A	#N/A
hsa-mir-365b	MI0000769	Chr17	31575411	31575521	+	AGAGUGUUCAAGGACAGCAAGAAAAAUGAGGGACUUUCAGGGGCAGCUGUGUUUUCUGACUCAGUCAUAAUGCCCCUAAAAAUCCUUAUUGUUCUUGCAGUGUGCAUCGGG	-1.37513	6.92555	270.255	9.98344e-61	4.24145e-59
hsa-mir-10226	MI0033056	Chr17	48032882	48032951	+	GAGGGAACUUCCAUGUGUCUGGGCUGGGAAACUGGAGUUCUCCACUGGGAGACAUUGAGUGUAUCCUUCU	#N/A	#N/A	#N/A	#N/A	#N/A
hsa-mir-152	MI0000462	Chr17	48037161	48037247	-	UGUCCCCCCCGGCCCAGGUUCUGUGAUACACUCCGACUCGGGCUCUGGAGCAGUCAGUGCAUGACAGAACUUGGGCCCGGAAGGACC	#N/A	#N/A	#N/A	#N/A	#N/A
hsa-mir-4736	MI0017373	Chr17	58335976	58336022	-	AGGCAGGUUAUCUGGGCUGCCAUCUCCCACUGGCUGCUUGCCUGCCU	1.55622	-0.630278	26.7084	2.36587e-07	9.16285e-07
hsa-mir-142	MI0000458	Chr17	58331232	58331318	-	GACAGUGCAGUCACCCAUAAAGUAGAAAGCACUACUAACAGCACUGGAGGGUGUAGUGUUUCCUACUUUAUGGAUGAGUGUACUGUG	1.90256	11.5154	129.588	5.04227e-30	8.51718e-29
hsa-mir-5047	MI0017932	Chr17	64501214	64501313	-	GAAGCGCUUGCCUAGACGAGACACAGUGCAUAAAAACAACUUUUGGGGGACAGGUAUGUUUUCUUGCAGCUGCGGUUGUAAGGUCUUGGCAAGACAAGCA	#N/A	#N/A	#N/A	#N/A	#N/A
hsa-mir-3064	MI0017375	Chr17	64500774	64500839	-	GGUCUGGCUGUUGUGGUGUGCAAAACUCCGUACAUUGCUAUUUUGCCACACUGCAACACCUUACAG	#N/A	#N/A	#N/A	#N/A	#N/A
hsa-mir-548d-2	MI0003671	Chr17	67471489	67471585	-	GAGAGGGAAGAUUUAGGUUGGUGCAAAAGUAAUUGUGGUUUUUGCCAUUGAAAGUAAUGGCAAAAACCACAGUUUCUUUUGCACCAACCUAAUAAAA	1.17692	-0.471381	14.0165	0.000181215	0.000484854
hsa-mir-548aa-2	MI0016690	Chr17	67471489	67471585	+	UUUUAUUAGGUUGGUGCAAAAGAAACUGUGGUUUUUGCCAUUACUUUCAAUGGCAAAAACCACAAUUACUUUUGCACCAACCUAAAUCUUCCCUCUC	#N/A	#N/A	#N/A	#N/A	#N/A
hsa-mir-4524b	MI0019114	Chr17	69099542	69099656	+	UAGCUGGGUGGAUGUGUUCUUUUGAAGGAUAGCAGCAUAAGCCUGUCUCAAAAUAAUUCUGCAGUGAGACAGGUUCAUGCUGCUAUCGUUCCAAAGAGGAAGGGUAAUCACUGUC	#N/A	#N/A	#N/A	#N/A	#N/A
hsa-mir-4524a	MI0016891	Chr17	69099564	69099632	-	GAACGAUAGCAGCAUGAACCUGUCUCACUGCAGAAUUAUUUUGAGACAGGCUUAUGCUGCUAUCCUUCA	-1.94937	-0.489908	134.969	3.35371e-31	6.35393e-30
hsa-mir-1-2	MI0000437	Chr18	21829004	21829088	-	ACCUACUCAGAGUACAUACUUCUUUAUGUACCCAUAUGAACAUACAAUGCUAUGGAAUGUAAAGAAGUAUGUAUUUUUGGUAGGC	-5.47381	4.70951	1165.71	1.7254e-255	4.0317e-253
hsa-mir-133a-1	MI0000450	Chr18	21825698	21825785	-	ACAAUGCUUUGCUAGAGCUGGUAAAAUGGAACCAAAUCGCCUCUUCAAUGGAUUUGGUCCCCUUCAACCAGCUGUAGCUAUGCAUUGA	-6.21604	4.26987	1610.33	0	0
hsa-mir-5583-1	MI0019139	Chr18	39676721	39676779	+	AAACUAAUAUACCCAUAUUCUGGCUAGGUGAUCAUCAGAAUAUGGGUAUAUUAGUUUGG	#N/A	#N/A	#N/A	#N/A	#N/A
hsa-mir-5583-2	MI0019140	Chr18	39676719	39676777	-	AAACUAAUAUACCCAUAUUCUGAUGAUCACCUAGCCAGAAUAUGGGUAUAUUAGUUUGG	#N/A	#N/A	#N/A	#N/A	#N/A
hsa-mir-122	MI0000442	Chr18	58451074	58451158	+	CCUUAGCAGAGCUGUGGAGUGUGACAAUGGUGUUUGUGUCUAAACUAUCAAACGCCAUUAUCACACUAAAUAGCUACUGCUAGGC	2.9399	-0.0390005	12.3652	0.000437414	0.0010951
hsa-mir-122b	MI0017383	Chr18	58451080	58451152	-	CAGUAGCUAUUUAGUGUGAUAAUGGCGUUUGAUAGUUUAGACACAAACACCAUUGUCACACUCCACAGCUCUG	#N/A	#N/A	#N/A	#N/A	#N/A
hsa-mir-4745	MI0017384	Chr19	804940	805001	+	GUGAGUGGGGCUCCCGGGACGGCGCCCGCCCUGGCCCUGGCCCGGCGACGUCUCACGGUCCC	1.2873	-0.323564	18.7224	1.51193e-05	4.70005e-05
hsa-mir-3187	MI0014231	Chr19	813584	813653	+	GCUGGCCCUGGGCAGCGUGUGGCUGAAGGUCACCAUGUUCUCCUUGGCCAUGGGGCUGCGCGGGGCCAGC	1.52466	0.0454228	42.7082	6.35451e-11	3.50749e-10
hsa-mir-6789	MI0022634	Chr19	2235829	2235926	-	CGAGGUAGGGGCGUCCCGGGCGCGCGGGCGGGUCCCAGGCUGGGCCCCUCGGAGGCCGGGUGCUCACUGCCCCGUCCCGGCGCCCGUGUCUCCUCCAG	#N/A	#N/A	#N/A	#N/A	#N/A
hsa-mir-1227	MI0006316	Chr19	2234062	2234149	-	GUGGGGCCAGGCGGUGGUGGGCACUGCUGGGGUGGGCACAGCAGCCAUGCAGAGCGGGCAUUUGACCCCGUGCCACCCUUUUCCCCAG	#N/A	#N/A	#N/A	#N/A	#N/A
hsa-mir-6790	MI0022635	Chr19	6392921	6392983	-	GUGAGUGUGGAUUUGGCGGGGUUCGGGGGUUCCGACGGCGACCUCGGCGACCCCUCACUCACC	#N/A	#N/A	#N/A	#N/A	#N/A
hsa-mir-6885	MI0022732	Chr19	6389638	6389703	-	CCUGGAGGGGGGCACUGCGCAAGCAAAGCCAGGGACCCUGAGAGGCUUUGCUUCCUGCUCCCCUAG	#N/A	#N/A	#N/A	#N/A	#N/A
hsa-mir-181c	MI0000271	Chr19	13874699	13874808	+	CGGAAAAUUUGCCAAGGGUUUGGGGGAACAUUCAACCUGUCGGUGAGUUUGGGCAGCUCAGGCAAACCAUCGACCGUUGAGUGGACCCUGAGGCCUGGAAUUGCCAUCCU	#N/A	#N/A	#N/A	#N/A	#N/A
hsa-mir-181d	MI0003139	Chr19	13874875	13875011	+	GUCCCCUCCCCUAGGCCACAGCCGAGGUCACAAUCAACAUUCAUUGUUGUCGGUGGGUUGUGAGGACUGAGGCCAGACCCACCGGGGGAUGAAUGUCACUGUGGCUGGGCCAGACACGGCUUAAGGGGAAUGGGGAC	1.0286	4.86119	54.3348	1.69081e-13	1.10257e-12
hsa-mir-642a	MI0003657	Chr19	45674928	45675024	+	AUCUGAGUUGGGAGGGUCCCUCUCCAAAUGUGUCUUGGGGUGGGGGAUCAAGACACAUUUGGAGAGGGAACCUCCCAACUCGGCCUCUGCCAUCAUU	#N/A	#N/A	#N/A	#N/A	#N/A
hsa-mir-642b	MI0016685	Chr19	45674932	45675008	-	GAGUUGGGAGGUUCCCUCUCCAAAUGUGUCUUGAUCCCCCACCCCAAGACACAUUUGGAGAGGGACCCUCCCAACUC	#N/A	#N/A	#N/A	#N/A	#N/A
hsa-mir-3190	MI0014235	Chr19	47226942	47227021	+	CUGGGGUCACCUGUCUGGCCAGCUACGUCCCCACGGCCCUUGUCAGUGUGGAAGGUAGACGGCCAGAGAGGUGACCCCGG	#N/A	#N/A	#N/A	#N/A	#N/A
hsa-mir-3191	MI0014236	Chr19	47226944	47227019	-	GGGGUCACCUCUCUGGCCGUCUACCUUCCACACUGACAAGGGCCGUGGGGACGUAGCUGGCCAGACAGGUGACCCC	#N/A	#N/A	#N/A	#N/A	#N/A
hsa-mir-10394	MI0033418	Chr19	58393364	58393446	+	UCUGCAGGUCCUGGUGAACGCCAUCAUCAACAGUGGUCCCCGGGAGGACUCCACACGCAUUGGGCGCGCCGGGACUGUGAGAC	#N/A	#N/A	#N/A	#N/A	#N/A
hsa-mir-4754	MI0017394	Chr19	58386770	58386858	-	ACGCGCCUGAUGCGGACCUGGGUUAGCGGAGUGAGGCCCAGUGGUCACCGCCGCCCUCCGCAGGUCCAGGUUGCCGUGCGCAUGUGCCU	#N/A	#N/A	#N/A	#N/A	#N/A
hsa-mir-216a	MI0000292	Chr2	55988950	55989059	-	GAUGGCUGUGAGUUGGCUUAAUCUCAGCUGGCAACUGUGAGAUGUUCAUACAAUCCCUCACAGUGGUCUCUGGGAUUAUGCUAAACAGAGCAAUUUCCUAGCCCUCACGA	#N/A	#N/A	#N/A	#N/A	#N/A
hsa-mir-217	MI0000293	Chr2	55982967	55983076	-	AGUAUAAUUAUUACAUAGUUUUUGAUGUCGCAGAUACUGCAUCAGGAACUGAUUGGAUAAGAAUCAGUCACCAUCAGUUCCUAAUGCAUUGCCUUCAGCAUCUAAACAAG	#N/A	#N/A	#N/A	#N/A	#N/A
hsa-mir-4433a	MI0016773	Chr2	64340759	64340839	+	CAUCCUCCUUACGUCCCACCCCCCACUCCUGUUUCUGGUGAAAUAUUCAAACAGGAGUGGGGGUGGGACAUAAGGAGGAUA	#N/A	#N/A	#N/A	#N/A	#N/A
hsa-mir-4433b	MI0025511	Chr2	64340747	64340848	-	UGUGUUCCCUAUCCUCCUUAUGUCCCACCCCCACUCCUGUUUGAAUAUUUCACCAGAAACAGGAGUGGGGGGUGGGACGUAAGGAGGAUGGGGGAAAGAACA	-1.57526	-0.600723	27.6807	1.43081e-07	5.69885e-07
hsa-mir-4773-1	MI0017415	Chr2	151368334	151368411	+	UGCUCCCCAGCCUUUCUAUGCUCCUGUUCUGCUUUAUUUCAUCAAAGCAGAACAGGAGCAUAGAAAGGCUGGGGAGCA	#N/A	#N/A	#N/A	#N/A	#N/A
hsa-mir-4773-2	MI0017416	Chr2	151368334	151368411	-	UGCUCCCCAGCCUUUCUAUGCUCCUGUUCUGCUUUGAUGAAAUAAAGCAGAACAGGAGCAUAGAAAGGCUGGGGAGCA	#N/A	#N/A	#N/A	#N/A	#N/A
hsa-mir-1245a	MI0006380	Chr2	188978092	188978161	+	AUUUAUGUAUAGGCCUUUAGAUCAUCUGAUGUUGAAUACUCUUUAAGUGAUCUAAAGGCCUACAUAUAAA	#N/A	#N/A	#N/A	#N/A	#N/A
hsa-mir-1245b	MI0017431	Chr2	188978093	188978161	-	UUUAUAUGUAGGCCUUUAGAUCACUUAAAGAGUAUUCAACAUCAGAUGAUCUAAAGGCCUAUACAUAAA	#N/A	#N/A	#N/A	#N/A	#N/A
hsa-mir-3130-1	MI0014147	Chr2	206783234	206783308	-	CUUGUCAUGUCUUACCCAGUCUCCGGUGCAGCCUGUUGUCAAGGCUGCACCGGAGACUGGGUAAGACAUGACAAG	#N/A	#N/A	#N/A	#N/A	#N/A
hsa-mir-3130-2	MI0014148	Chr2	206783234	206783308	+	CUUGUCAUGUCUUACCCAGUCUCCGGUGCAGCCUUGACAACAGGCUGCACCGGAGACUGGGUAAGACAUGACAAG	#N/A	#N/A	#N/A	#N/A	#N/A
hsa-mir-4776-1	MI0017419	Chr2	212926257	212926336	+	CUAUAUGCAGUGGACCAGGAUGGCAAGGGCUCUCCUGAAAGGACAGUAGAGCCCUUGCCAUCCUGGUCCACUGCAUAUAG	#N/A	#N/A	#N/A	#N/A	#N/A
hsa-mir-4776-2	MI0017420	Chr2	212926257	212926336	-	CUAUAUGCAGUGGACCAGGAUGGCAAGGGCUCUACUGUCCUUUCAGGAGAGCCCUUGCCAUCCUGGUCCACUGCAUAUAG	#N/A	#N/A	#N/A	#N/A	#N/A
hsa-mir-103a-2	MI0000108	Chr20	3917494	3917571	+	UUGUGCUUUCAGCUUCUUUACAGUGCUGCCUUGUAGCAUUCAGGUCAAGCAGCAUUGUACAGGGCUAUGAAAGAACCA	#N/A	#N/A	#N/A	#N/A	#N/A
hsa-mir-103b-2	MI0007262	Chr20	3917502	3917563	-	UCAUAGCCCUGUACAAUGCUGCUUGACCUGAAUGCUACAAGGCAGCACUGUAAAGAAGCUGA	#N/A	#N/A	#N/A	#N/A	#N/A
hsa-mir-499a	MI0003183	Chr20	34990376	34990497	+	GCCCUGUCCCCUGUGCCUUGGGCGGGCGGCUGUUAAGACUUGCAGUGAUGUUUAACUCCUCUCCACGUGAACAUCACAGCAAGUCUGUGCUGCUUCCCGUCCCUACGCUGCCUGGGCAGGGU	-1.61136	0.0622792	92.431	6.9715e-22	7.29406e-21
hsa-mir-499b	MI0017396	Chr20	34990400	34990472	-	GGAAGCAGCACAGACUUGCUGUGAUGUUCACGUGGAGAGGAGUUAAACAUCACUGCAAGUCUUAACAGCCGCC	#N/A	#N/A	#N/A	#N/A	#N/A
hsa-mir-298	MI0005523	Chr20	58818226	58818313	-	UCAGGUCUUCAGCAGAAGCAGGGAGGUUCUCCCAGUGGUUUUCCUUGACUGUGAGGAACUAGCCUGCUGCUUUGCUCAGGAGUGAGCU	#N/A	#N/A	#N/A	#N/A	#N/A
hsa-mir-296	MI0000747	Chr20	58817615	58817694	-	AGGACCCUUCCAGAGGGCCCCCCCUCAAUCCUGUUGUGCCUAAUUCAGAGGGUUGGGUGGAGGCUCUCCUGAAGGGCUCU	#N/A	#N/A	#N/A	#N/A	#N/A
hsa-mir-647	MI0003662	Chr20	63942631	63942726	-	AGGAAGUGUUGGCCUGUGGCUGCACUCACUUCCUUCAGCCCCAGGAAGCCUUGGUCGGGGGCAGGAGGGAGGGUCAGGCAGGGCUGGGGGCCUGAC	#N/A	#N/A	#N/A	#N/A	#N/A
hsa-mir-1914	MI0008335	Chr20	63941465	63941544	-	CGUGUGAGCCCGCCCUGUGCCCGGCCCACUUCUGCUUCCUCUUAGCGCAGGAGGGGUCCCGCACUGGGAGGGGCCCUCAC	#N/A	#N/A	#N/A	#N/A	#N/A
hsa-mir-6724-2	MI0031516	Chr21	8249505	8249596	+	CGCUGCGCUUCUGGGCCCGCGGCGGGCGUGGGGCUGCCCGGGCCGGUCGACCAGCGCGCCGUAGCUCCCGAGGCCCGAGCCGCGACCCGCGG	#N/A	#N/A	#N/A	#N/A	#N/A
hsa-mir-10401	MI0033425	Chr21	8206563	8206618	+	CGUGUGGGAAGGCGUGGGGUGCGGACCCCGGCCCGACCUCGCCGUCCCGCCCGCCG	#N/A	#N/A	#N/A	#N/A	#N/A
hsa-mir-10401	MI0033425	Chr21	8250772	8250827	+	CGUGUGGGAAGGCGUGGGGUGCGGACCCCGGCCCGACCUCGCCGUCCCGCCCGCCG	#N/A	#N/A	#N/A	#N/A	#N/A
hsa-mir-10401	MI0033425	Chr21	8389610	8389665	+	CGUGUGGGAAGGCGUGGGGUGCGGACCCCGGCCCGACCUCGCCGUCCCGCCCGCCG	#N/A	#N/A	#N/A	#N/A	#N/A
hsa-mir-10401	MI0033425	Chr21	8433797	8433852	+	CGUGUGGGAAGGCGUGGGGUGCGGACCCCGGCCCGACCUCGCCGUCCCGCCCGCCG	#N/A	#N/A	#N/A	#N/A	#N/A
hsa-mir-6724-3	MI0031517	Chr21	8388362	8388453	+	CGCUGCGCUUCUGGGCCCGCGGCGGGCGUGGGGCUGCCCGGGCCGGUCGACCAGCGCGCCGUAGCUCCCGAGGCCCGAGCCGCGACCCGCGG	#N/A	#N/A	#N/A	#N/A	#N/A
hsa-mir-10401	MI0033425	Chr21	8206563	8206618	+	CGUGUGGGAAGGCGUGGGGUGCGGACCCCGGCCCGACCUCGCCGUCCCGCCCGCCG	#N/A	#N/A	#N/A	#N/A	#N/A
hsa-mir-10401	MI0033425	Chr21	8250772	8250827	+	CGUGUGGGAAGGCGUGGGGUGCGGACCCCGGCCCGACCUCGCCGUCCCGCCCGCCG	#N/A	#N/A	#N/A	#N/A	#N/A
hsa-mir-10401	MI0033425	Chr21	8389610	8389665	+	CGUGUGGGAAGGCGUGGGGUGCGGACCCCGGCCCGACCUCGCCGUCCCGCCCGCCG	#N/A	#N/A	#N/A	#N/A	#N/A
hsa-mir-10401	MI0033425	Chr21	8433797	8433852	+	CGUGUGGGAAGGCGUGGGGUGCGGACCCCGGCCCGACCUCGCCGUCCCGCCCGCCG	#N/A	#N/A	#N/A	#N/A	#N/A
hsa-mir-3648-2	MI0031512	Chr21	8986999	8987178	+	CGCGACUGCGGCGGCGGUGGUGGGGGGAGCCGCGGGGAUCGCCGAGGGCCGGUCGGCCGCCCCGGGUGCCGCGCGGUGCCGCCGGCGGCGGUGAGGCCCCGCGCGUGUGUCCCGGCUGCGGUCGGCCGCGCUCGAGGGGUCCCCGUGGCGUCCCCUUCCCCGCCGGCCGCCUUUCUCGCG	#N/A	#N/A	#N/A	#N/A	#N/A
hsa-mir-10396a	MI0033420	Chr21	8987617	8987665	+	GGCGGGGCUCGGAGCCGGGCUUCGGCCGGGCCCCGGGCCCUCGACCGGG	#N/A	#N/A	#N/A	#N/A	#N/A
hsa-mir-99a	MI0000101	Chr21	16539089	16539169	+	CCCAUUGGCAUAAACCCGUAGAUCCGAUCUUGUGGUGAAGUGGACCGCACAAGCUCGCUUCUAUGGGUCUGUGUCAGUGUG	-2.04479	9.84728	495.364	9.6998e-110	9.7137e-108
hsa-let-7c	MI0000064	Chr21	16539828	16539911	+	GCAUCCGGGUUGAGGUAGUAGGUUGUAUGGUUUAGAGUUACACCCUGGGAGUUAACUGUACAACCUUCUAGCUUUCCUUGGAGC	-1.72803	11.5225	372.632	5.00083e-83	3.04833e-81
hsa-mir-3618	MI0016008	Chr22	20085746	20085833	+	UAAGCUGAGUGCAUUGUGAUUUCCAAUAAUUGAGGCAGUGGUUCUAAAAGCUGUCUACAUUAAUGAAAAGAGCAAUGUGGCCAGCUUG	1.08829	-0.612527	14.1721	0.000166827	0.000450943
hsa-mir-1306	MI0006443	Chr22	20086058	20086142	+	GUGAGCAGUCUCCACCACCUCCCCUGCAAACGUCCAGUGGUGCAGAGGUAAUGGACGUUGGCUCUGGUGGUGAUGGACAGUCCGA	#N/A	#N/A	#N/A	#N/A	#N/A
hsa-mir-301b	MI0005568	Chr22	21652981	21653058	+	GCCGCAGGUGCUCUGACGAGGUUGCACUACUGUGCUCUGAGAAGCAGUGCAAUGAUAUUGUCAAAGCAUCUGGGACCA	3.10649	1.26675	139.291	3.80419e-32	7.51193e-31
hsa-mir-130b	MI0000748	Chr22	21653304	21653385	+	GGCCUGCCCGACACUCUUUCCCUGUUGCACUACUAUAGGCCGCUGGGAAGCAGUGCAAUGAUGAAAGGGCAUCGGUCAGGUC	1.56955	4.80365	136.049	1.94627e-31	3.7379e-30
hsa-mir-3199-2	MI0014248	Chr22	27920526	27920611	+	GUGACUCCCAGGGACUGCCUUAGGAGAAAGUUUCUGGAAUGUCAGAACUUCCAGAAACUUUCUCCUAAGGCAGUCCCUGGAGUCAC	-1.7164	0.546689	294.754	4.5797e-66	2.14025e-64
hsa-mir-3199-1	MI0014247	Chr22	27920525	27920612	-	GGUGACUCCAGGGACUGCCUUAGGAGAAAGUUUCUGGAAGUUCUGACAUUCCAGAAACUUUCUCCUAAGGCAGUCCCUGGGAGUCACU	-1.52789	-0.212239	144.437	2.8517e-33	5.96729e-32
hsa-mir-3909	MI0016413	Chr22	35335640	35335758	+	GGUAUGCUGUUGCGCUGUCCUUCCUCUGGGGAGCAGGCUCCGGGGGACAGGGAAAAGCACACAAGGAACUUGUCCUCUAGGGCCUGCAGUCUCAUGGGAGAGUGACAUGCACCAGGACC	#N/A	#N/A	#N/A	#N/A	#N/A
hsa-mir-6069	MI0020346	Chr22	35336721	35336799	-	UGGUGACCCCUGGGCUAGGGCCUGCUGCCCCCUGCCCAGUGCAGGAGGGUGGAGGGUCACUCCUUAGGUGGUCCCAGUG	#N/A	#N/A	#N/A	#N/A	#N/A
hsa-mir-659	MI0003683	Chr22	37847678	37847774	-	UACCGACCCUCGAUUUGGUUCAGGACCUUCCCUGAACCAAGGAAGAGUCACAGUCUCUUCCUUGGUUCAGGGAGGGUCCCCAACAAUGUCCUCAUGG	#N/A	#N/A	#N/A	#N/A	#N/A
hsa-mir-658	MI0003682	Chr22	37844272	37844371	-	GCUCGGUUGCCGUGGUUGCGGGCCCUGCCCGCCCGCCAGCUCGCUGACAGCACGACUCAGGGCGGAGGGAAGUAGGUCCGUUGGUCGGUCGGGAACGAGG	1.37853	-0.237908	41.1458	1.41287e-10	7.53175e-10
hsa-mir-191	MI0000465	Chr3	49020618	49020709	-	CGGCUGGACAGCGGGCAACGGAAUCCCAAAAGCAGCUGUUGUCUCCAGAGCAUUCCAGCUGCGCUUGGAUUUCGUCCCCUGCUCUCCUGCCU	1.28995	10.2414	116.019	4.70785e-27	6.66708e-26
hsa-mir-425	MI0001448	Chr3	49020148	49020234	-	GAAAGCGCUUUGGAAUGACACGAUCACUCCCGUUGAGUGGGCACCCGAGAAGCCAUCGGGAAUGUCGUGUCCGCCCAGUGCUCUUUC	#N/A	#N/A	#N/A	#N/A	#N/A
hsa-mir-15b	MI0000438	Chr3	160404588	160404685	+	UUGAGGCCUUAAAGUACUGUAGCAGCACAUCAUGGUUUACAUGCUACAGUCAAGAUGCGAAUCAUUAUUUGCUGCUCUAGAAAUUUAAGGAAAUUCAU	#N/A	#N/A	#N/A	#N/A	#N/A
hsa-mir-16-2	MI0000115	Chr3	160404745	160404825	+	GUUCCACUCUAGCAGCACGUAAAUAUUGGCGUAGUGAAAUAUAUAUUAAACACCAAUAUUACUGUGCUGCUUUAGUGUGAC	#N/A	#N/A	#N/A	#N/A	#N/A
hsa-mir-4450	MI0016795	Chr4	76573568	76573632	+	UGUCUGGGGAUUUGGAGAAGUGGUGAGCGCAGGUCUUUGGCACCAUCUCCCCUGGUCCCUUGGCU	#N/A	#N/A	#N/A	#N/A	#N/A
hsa-mir-548ah	MI0016796	Chr4	76575551	76575626	+	AGGUUGGUGCAAAAGUGAUUGCAGUGUUUGCCAAUAAAAGUAAUGACAAAAACUGCAGUUACUUUUGCACCAGCCC	#N/A	#N/A	#N/A	#N/A	#N/A
hsa-mir-3688-2	MI0017447	Chr4	159128805	159128891	+	UCACUUUAAAGAGUGGCAAAGUCUUUCCAUAUGUGUAACAGACAUACAUACAUACAUAUGGAAAGACUUUGCCACUCUUGAAAGUGA	#N/A	#N/A	#N/A	#N/A	#N/A
hsa-mir-3688-1	MI0016089	Chr4	159128802	159128894	-	UCUUCACUUUCAAGAGUGGCAAAGUCUUUCCAUAUGUAUGUAUGUAUGUCUGUUACACAUAUGGAAAGACUUUGCCACUCUUUAAAGUGAAGA	#N/A	#N/A	#N/A	#N/A	#N/A
hsa-mir-143	MI0000459	Chr5	149428918	149429023	+	GCGCAGCGCCCUGUCUCCCAGCCUGAGGUGCAGUGCUGCAUCUCUGGUCAGUUGGGAGUCUGAGAUGAAGCACUGUAGCUCAGGAAGAGAGAAGUUGUUCUGCAGC	-1.17608	15.5367	152.649	4.57155e-35	1.05071e-33
hsa-mir-145	MI0000461	Chr5	149430646	149430733	+	CACCUUGUCCUCACGGUCCAGUUUUCCCAGGAAUCCCUUAGAUGCUAAGAUGGGGAUUCCUGGAAAUACUGUUCUUGAGGUCAUGGUU	-2.29661	10.9368	806.439	2.1479e-177	3.7641e-175
hsa-mir-103b-1	MI0007261	Chr5	168560904	168560965	+	UCAUAGCCCUGUACAAUGCUGCUUGAUCCAUAUGCAACAAGGCAGCACUGUAAAGAAGCCGA	#N/A	#N/A	#N/A	#N/A	#N/A
hsa-mir-103a-1	MI0000109	Chr5	168560896	168560973	-	UACUGCCCUCGGCUUCUUUACAGUGCUGCCUUGUUGCAUAUGGAUCAAGCAGCAUUGUACAGGGCUAUGAAGGCAUUG	#N/A	#N/A	#N/A	#N/A	#N/A
hsa-mir-5683	MI0019284	Chr6	6169334	6169409	+	GGAGCUUGUUACAGAUGCAGAUUCUCUGACUUCUUACUGCACCAGUGAAGUCAGGAUCUGCAUUUGAAUAAGACCC	-2.33247	3.93386	220.197	8.19229e-50	2.80136e-48
hsa-mir-7853	MI0025523	Chr6	6169304	6169435	-	UCUCACACUUCAAUAGGCAUUGUCUGGGGUCUUAUUCAAAUGCAGAUCCUGACUUCACUGGUGCAGUAAGAAGUCAGAGAAUCUGCAUCUGUAACAAGCUCCCAGGUGAUGAUGGUGCUGCUGGUGUGCAGA	#N/A	#N/A	#N/A	#N/A	#N/A
hsa-mir-6833	MI0022678	Chr6	32179816	32179876	+	AAACGGUGUGGAAGAUGGGAGGAGAAAAAUCCCUGUUAACUUUCUCUCUCCACUUCCUCAG	#N/A	#N/A	#N/A	#N/A	#N/A
hsa-mir-6721	MI0022556	Chr6	32170030	32170116	-	CCCUCAUCUCUGGGCAGGGGCUUAUUGUAGGAGUCUCUGAAGAGAGCUGUGGACUGACCUGCUUUAACCCUUCCCCAGGUUCCCAUU	#N/A	#N/A	#N/A	#N/A	#N/A
hsa-mir-6834	MI0022679	Chr6	33290245	33290325	+	GUGAGGGACUGGGAUUUGUGGGGCGAGGAGGGACCUGUACUAGCCAUGGUUCUGAUCACAUAUGUCCCAUCCCUCCAUCAG	#N/A	#N/A	#N/A	#N/A	#N/A
hsa-mir-6873	MI0022720	Chr6	33287227	33287289	-	CCCAGCAGAGGGAAUACAGAGGGCAAUCAGGACUGGGUCAUUCUCUCUGUCUUUCUCUCUCAG	#N/A	#N/A	#N/A	#N/A	#N/A
hsa-mir-206	MI0000490	Chr6	52144349	52144434	+	UGCUUCCCGAGGCCACAUGCUUCUUUAUAUCCCCAUAUGGAUUACUUUGCUAUGGAAUGUAAGGAAGUGUGUGGUUUCGGCAAGUG	-3.51252	5.6461	47.3712	5.87383e-12	3.51928e-11
hsa-mir-133b	MI0000822	Chr6	52148923	52149041	+	CCUCAGAAGAAAGAUGCCCCCUGCUCUGGCUGGUCAAACGGAACCAAGUCCGUCUUCCUGAGAGGUUUGGUCCCCUUCAACCAGCUACAGCAGGGCUGGCAAUGCCCAGUCCUUGGAGA	-6.29235	2.95733	562.097	2.9414e-124	3.4366e-122
hsa-mir-550a-1	MI0003600	Chr7	30289794	30289890	+	UGAUGCUUUGCUGGCUGGUGCAGUGCCUGAGGGAGUAAGAGCCCUGUUGUUGUAAGAUAGUGUCUUACUCCCUCAGGCACAUCUCCAACAAGUCUCU	#N/A	#N/A	#N/A	#N/A	#N/A
hsa-mir-550b-1	MI0016686	Chr7	30289794	30289890	-	AGAGACUUGUUGGAGAUGUGCCUGAGGGAGUAAGACACUAUCUUACAACAACAGGGCUCUUACUCCCUCAGGCACUGCACCAGCCAGCAAAGCAUCA	#N/A	#N/A	#N/A	#N/A	#N/A
hsa-mir-550a-2	MI0003601	Chr7	32732981	32733077	+	UGAUGCUUUGCUGGCUGGUGCAGUGCCUGAGGGAGUAAGAGCCCUGUUGUUGUCAGAUAGUGUCUUACUCCCUCAGGCACAUCUCCAGCGAGUCUCU	#N/A	#N/A	#N/A	#N/A	#N/A
hsa-mir-550b-2	MI0016687	Chr7	32732981	32733077	-	AGAGACUCGCUGGAGAUGUGCCUGAGGGAGUAAGACACUAUCUGACAACAACAGGGCUCUUACUCCCUCAGGCACUGCACCAGCCAGCAAAGCAUCA	#N/A	#N/A	#N/A	#N/A	#N/A
hsa-mir-3914-2	MI0016421	Chr7	71307674	71307768	+	GAGUUCCUACUCAACUUCUCAUUUUCUGGUUCCUUCUACCAAGUUAAGCAUACUCAUUAGAAGGAACCAGAAAAUGAGAAGUUAAAUCUGAAGUC	#N/A	#N/A	#N/A	#N/A	#N/A
hsa-mir-3914-1	MI0016419	Chr7	71307672	71307770	-	UGGACUUCAGAUUUAACUUCUCAUUUUCUGGUUCCUUCUAAUGAGUAUGCUUAACUUGGUAGAAGGAACCAGAAAAUGAGAAGUUGAGUAGGAACUCUA	#N/A	#N/A	#N/A	#N/A	#N/A
hsa-mir-489	MI0003124	Chr7	93483936	93484019	-	GUGGCAGCUUGGUGGUCGUAUGUGUGACGCCAUUUACUUGAACCUUUAGGAGUGACAUCACAUAUACGGCAGCUAAACUGCUAC	#N/A	#N/A	#N/A	#N/A	#N/A
hsa-mir-653	MI0003674	Chr7	93482760	93482855	-	UUCAUUCCUUCAGUGUUGAAACAAUCUCUACUGAACCAGCUUCAAACAAGUUCACUGGAGUUUGUUUCAAUAUUGCAAGAAUGAUAAGAUGGAAGC	#N/A	#N/A	#N/A	#N/A	#N/A
hsa-mir-5692a-1	MI0019297	Chr7	97963658	97963726	+	GACAGUACAAAUAAUACCACAGUGGGUGUACCUCAUGUGUGUACACCCUGUGAUAUUAUUUGUAAUAUC	#N/A	#N/A	#N/A	#N/A	#N/A
hsa-mir-5692c-2	MI0019289	Chr7	97964405	97964481	-	UGUGUACACCAACUGUGAUAUUAGGAGUCCUAUUUAUUUUUAGGAUAUUAGGAAUAAUAUCACAGUAGGUGUACACA	#N/A	#N/A	#N/A	#N/A	#N/A
hsa-mir-5090	MI0017979	Chr7	102465742	102465826	+	UCUGAGGUACCCGGGGCAGAUUGGUGUAGGGUGCAAAGCCUGCCCGCCCCCUAAGCCUUCUGCCCCCAACUCCAGCCUGUCAGGA	#N/A	#N/A	#N/A	#N/A	#N/A
hsa-mir-4467	MI0016818	Chr7	102471469	102471531	+	UGGUGGCGGCGGUAGUUAUGGGCUUCUCUUUCUCACCAGCAGCCCCUGGGCCGCCGCCUCCCU	#N/A	#N/A	#N/A	#N/A	#N/A
hsa-mir-29b-1	MI0000105	Chr7	130877459	130877539	-	CUUCAGGAAGCUGGUUUCAUAUGGUGGUUUAGAUUUAAAUAGUGAUUGUCUAGCACCAUUUGAAAUCAGUGUUCUUGGGGG	#N/A	#N/A	#N/A	#N/A	#N/A
hsa-mir-29a	MI0000087	Chr7	130876747	130876810	-	AUGACUGAUUUCUUUUGGUGUUCAGAGUCAAUAUAAUUUUCUAGCACCAUCUGAAAUCGGUUAU	#N/A	#N/A	#N/A	#N/A	#N/A
hsa-mir-4659a	MI0017287	Chr8	6745164	6745244	+	GAAACUGCUGAAGCUGCCAUGUCUAAGAAGAAAACUUUGGAGAAAAAUUUUCUUCUUAGACAUGGCAACGUCAACAGUUUC	#N/A	#N/A	#N/A	#N/A	#N/A
hsa-mir-4659b	MI0017291	Chr8	6745168	6745240	-	CUGUUGACGUUGCCAUGUCUAAGAAGAAAAUUUUUCUCCAAAGUUUUCUUCUUAGACAUGGCAGCUUCAGCAG	#N/A	#N/A	#N/A	#N/A	#N/A
hsa-mir-3622a	MI0016013	Chr8	27701677	27701759	+	AAUAGAGGGUGCACAGGCACGGGAGCUCAGGUGAGGCAGGGAGCUGAGCUCACCUGACCUCCCAUGCCUGUGCACCCUCUAUU	-1.17921	-0.351191	29.0363	7.10329e-08	2.95514e-07
hsa-mir-3622b	MI0016014	Chr8	27701673	27701767	-	AGUGAUAUAAUAGAGGGUGCACAGGCAUGGGAGGUCAGGUGAGCUCAGCUCCCUGCCUCACCUGAGCUCCCGUGCCUGUGCACCCUCUAUUGGCU	#N/A	#N/A	#N/A	#N/A	#N/A
hsa-mir-486-2	MI0023622	Chr8	41660444	41660507	+	UCCUGUACUGAGCUGCCCCGAGCUGGGCAGCAUGAAGGGCCUCGGGGCAGCUCAGUACAGGAUG	-4.65153	6.70249	1453.88	4.11304215440733e-318	1.92216169851281e-315
hsa-mir-486-1	MI0002470	Chr8	41660441	41660508	-	GCAUCCUGUACUGAGCUGCCCCGAGGCCCUUCAUGCUGCCCAGCUCGGGGCAGCUCAGUACAGGAUAC	-4.64917	6.71229	1452.25	9.31389828520209e-318	3.26452134896333e-315
hsa-mir-5681a	MI0019281	Chr8	74548543	74548617	+	AGUUUUUGAAGAGUAUUGCCACCCUUUCUAGUCCCUAUUAGACUAGAAAGGGUGGCAAUACCUCUUCCAAAAACU	#N/A	#N/A	#N/A	#N/A	#N/A
hsa-mir-5681b	MI0019293	Chr8	74548550	74548609	-	GAAGAGGUAUUGCCACCCUUUCUAGUCUAAUAGGGACUAGAAAGGGUGGCAAUACUCUUC	1.92518	-0.509173	25.0239	5.66248e-07	2.07822e-06
hsa-mir-3150a	MI0014177	Chr8	95072914	95072993	+	GGGAAGCAGGCCAACCUCGACGAUCUCCUCAGCACCUGAACGCCAAGGCUGGGGAGAUCCUCGAGGUUGGCCUGCUUUCC	1.60832	-0.425904	34.7179	3.81114e-09	1.78107e-08
hsa-mir-3150b	MI0016426	Chr8	95072911	95072996	-	GAGGGAAAGCAGGCCAACCUCGAGGAUCUCCCCAGCCUUGGCGUUCAGGUGCUGAGGAGAUCGUCGAGGUUGGCCUGCUUCCCCUC	1.8791	1.85119	60.0878	9.07172e-15	6.52233e-14
hsa-mir-875	MI0005541	Chr8	99536786	99536861	-	UUAGUGGUACUAUACCUCAGUUUUAUCAGGUGUUCUUAAAAUCACCUGGAAACACUGAGGUUGUGUCUCACUGAAC	#N/A	#N/A	#N/A	#N/A	#N/A
hsa-mir-599	MI0003611	Chr8	99536636	99536730	-	AAAGACAUGCUGUCCACAGUGUGUUUGAUAAGCUGACAUGGGACAGGGAUUCUUUUCACUGUUGUGUCAGUUUAUCAAACCCAUACUUGGAUGAC	#N/A	#N/A	#N/A	#N/A	#N/A
hsa-mir-548d-1	MI0003668	Chr8	123348034	123348130	-	AAACAAGUUAUAUUAGGUUGGUGCAAAAGUAAUUGUGGUUUUUGCCUGUAAAAGUAAUGGCAAAAACCACAGUUUCUUUUGCACCAGACUAAUAAAG	1.38553	-0.427899	19.3449	1.09109e-05	3.44529e-05
hsa-mir-548aa-1	MI0016689	Chr8	123348034	123348130	+	CUUUAUUAGUCUGGUGCAAAAGAAACUGUGGUUUUUGCCAUUACUUUUACAGGCAAAAACCACAAUUACUUUUGCACCAACCUAAUAUAACUUGUUU	#N/A	#N/A	#N/A	#N/A	#N/A
hsa-mir-4662a	MI0017290	Chr8	124821985	124822051	+	UCUAUUUAGCCAAUUGUCCAUCUUUAGCUAUUCUGAAUGCCUAAAGAUAGACAAUUGGCUAAAUAGA	#N/A	#N/A	#N/A	#N/A	#N/A
hsa-mir-4662b	MI0017293	Chr8	124821978	124822058	-	CACAAUUUCUAUUUAGCCAAUUGUCUAUCUUUAGGCAUUCAGAAUAGCUAAAGAUGGACAAUUGGCUAAAUAGACACUGUG	#N/A	#N/A	#N/A	#N/A	#N/A
hsa-mir-30d	MI0000255	Chr8	134804876	134804945	-	GUUGUUGUAAACAUCCCCGACUGGAAGCUGUAAGACACAGCUAAGCUUUCAGUCAGAUGUUUGCUGCUAC	#N/A	#N/A	#N/A	#N/A	#N/A
hsa-mir-30b	MI0000441	Chr8	134800520	134800607	-	ACCAAGUUUCAGUUCAUGUAAACAUCCUACACUCAGCUGUAAUACAUGGAUUGGCUGGGAGGUGGAUGUUUACUUCAGCUGACUUGGA	#N/A	#N/A	#N/A	#N/A	#N/A
hsa-mir-4477a	MI0016829	Chr9	41233755	41233835	+	UCCUCCUCCCAUCAAUCACAAAUGUCCUUAAUGGCAUUUAAGGAUUGCUAUUAAGGACAUUUGUGAUUCACGGGAGGAGGU	#N/A	#N/A	#N/A	#N/A	#N/A
hsa-mir-4477b	MI0016830	Chr9	41233755	41233835	+	ACCUCCUCCCGUGAAUCACAAAUGUCCUUAAUAGCAAUCCUUAAAUGCCAUUAAGGACAUUUGUGAUUGAUGGGAGGAGGA	#N/A	#N/A	#N/A	#N/A	#N/A
hsa-mir-4477a	MI0016829	Chr9	41233755	41233835	-	UCCUCCUCCCAUCAAUCACAAAUGUCCUUAAUGGCAUUUAAGGAUUGCUAUUAAGGACAUUUGUGAUUCACGGGAGGAGGU	#N/A	#N/A	#N/A	#N/A	#N/A
hsa-mir-4477b	MI0016830	Chr9	41233755	41233835	-	ACCUCCUCCCGUGAAUCACAAAUGUCCUUAAUAGCAAUCCUUAAAUGCCAUUAAGGACAUUUGUGAUUGAUGGGAGGAGGA	#N/A	#N/A	#N/A	#N/A	#N/A
hsa-mir-3910-1	MI0016414	Chr9	91636251	91636361	+	CUUUUGCUGUCAGUUUUUCUGUUGCUUGUCUUGGUUUUAUGCCUUUUAUAUCAAGGCACAUAAAAGGCAUAAAACCAAGACAAGCAACAAAAAAAGGAUUGAUCACAGAAG	#N/A	#N/A	#N/A	#N/A	#N/A
hsa-mir-3910-2	MI0016431	Chr9	91636264	91636345	-	UUUUUUUGUUGCUUGUCUUGGUUUUAUGCCUUUUAUGUGCCUUGAUAUAAAAGGCAUAAAACCAAGACAAGCAACAGAAAAA	#N/A	#N/A	#N/A	#N/A	#N/A
hsa-mir-181a-2	MI0000269	Chr9	124692442	124692551	+	AGAAGGGCUAUCAGGCCAGCCUUCAGAGGACUCCAAGGAACAUUCAACGCUGUCGGUGAGUUUGGGAUUUGAAAAAACCACUGACCGUUGACUGUACCUUGGGGUCCUUA	#N/A	#N/A	#N/A	#N/A	#N/A
hsa-mir-181b-2	MI0000683	Chr9	124693710	124693798	+	CUGAUGGCUGCACUCAACAUUCAUUGCUGUCGGUGGGUUUGAGUCUGAAUCAACUCACUGAUCAAUGAAUGCAAACUGCGGACCAAACA	1.34225	7.61819	129.163	6.24847e-30	1.03063e-28
hsa-mir-3960	MI0016964	Chr9	127785833	127785923	+	GGCGCCCCGGCUCCCCGCGCCCCCGAUCGGGGCCGCCGCUAGUAGUGGCGGCGGCGGAGGCGGGGGCAGCGGCGGCGGCGGCGGAGGCGCC	#N/A	#N/A	#N/A	#N/A	#N/A
hsa-mir-2861	MI0013006	Chr9	127785918	127786007	+	GGCGCCUCUGCAGCUCCGGCUCCCCCUGGCCUCUCGGGAACUACAAGUCCCAGGGGGCCUGGCGGUGGGCGGCGGGCGGAAGAGGCGGGG	#N/A	#N/A	#N/A	#N/A	#N/A
hsa-mir-3154	MI0014182	Chr9	128244947	128245030	-	GGCCCCUCCUUCUCAGCCCCAGCUCCCGCUCACCCCUGCCACGUCAAAGGAGGCAGAAGGGGAGUUGGGAGCAGAGAGGGGACC	#N/A	#N/A	#N/A	#N/A	#N/A
hsa-mir-199b	MI0000282	Chr9	128244721	128244830	-	CCAGAGGACACCUCCACUCCGUCUACCCAGUGUUUAGACUAUCUGUUCAGGACUCCCAAAUUGUACAGUAGUCUGCACAUUGGUUAGGCUGGGCUGGGUUAGACCCUCGG	#N/A	#N/A	#N/A	#N/A	#N/A
hsa-mir-219b	MI0017299	Chr9	128392621	128392708	+	GGAGCUCAGCCACAGAUGUCCAGCCACAAUUCUCGGUUGGCCGCAGACUCGUACAAGAAUUGCGUUUGGACAAUCAGUGGCGAAGCCC	#N/A	#N/A	#N/A	#N/A	#N/A
hsa-mir-219a-2	MI0000740	Chr9	128392618	128392714	-	ACUCAGGGGCUUCGCCACUGAUUGUCCAAACGCAAUUCUUGUACGAGUCUGCGGCCAACCGAGAAUUGUGGCUGGACAUCUGUGGCUGAGCUCCGGG	1.14042	-0.498913	14.607	0.000132421	0.000361195
hsa-mir-222	MI0000299	ChrX	45747015	45747124	-	GCUGCUGGAAGGUGUAGGUACCCUCAAUGGCUCAGUAGCCAGUGUAGAUCCUGUCUUUCGUAAUCAGCAGCUACAUCUGGCUACUGGGUCUCUGAUGGCAUCUUCUAGCU	#N/A	#N/A	#N/A	#N/A	#N/A
hsa-mir-221	MI0000298	ChrX	45746157	45746266	-	UGAACAUCCAGGUCUGGGGCAUGAACCUGGCAUACAAUGUAGAUUUCUGUGUUCGUUAGGCAACAGCUACAUUGUCUGCUGGGUUUCAGGCUACCUGGAAACAUGUUCUC	#N/A	#N/A	#N/A	#N/A	#N/A
hsa-mir-6894	MI0022741	ChrX	53198889	53198945	-	CAAGAAGGAGGAUGGAGAGCUGGGCCAGACAUGCUCUUGCCUGCCCUCUUCCUCCAG	#N/A	#N/A	#N/A	#N/A	#N/A
hsa-mir-6895	MI0022742	ChrX	53195411	53195488	-	CAGCUCAGGGCCAGGCACAGAGUAAGCAUCAAUAGCAUUGGCAAGUUGAACUGAGCUGUCUCUCGCCCUUGGCCUUAG	#N/A	#N/A	#N/A	#N/A	#N/A
hsa-let-7f-2	MI0000068	ChrX	53557192	53557274	-	UGUGGGAUGAGGUAGUAGAUUGUAUAGUUUUAGGGUCAUACCCCAUCUUGGAGAUAACUAUACAGUCUACUGUCUUUCCCACG	#N/A	#N/A	#N/A	#N/A	#N/A
hsa-mir-98	MI0000100	ChrX	53556223	53556341	-	AGGAUUCUGCUCAUGCCAGGGUGAGGUAGUAAGUUGUAUUGUUGUGGGGUAGGGAUAUUAGGCCCCAAUUAGAAGAUAACUAUACAACUUACUACUUUCCCUGGUGUGUGGCAUAUUCA	#N/A	#N/A	#N/A	#N/A	#N/A
hsa-mir-4536-1	MI0016906	ChrX	55451495	55451582	-	AUGUGGUAGAUAUAUGCACGAUAUAUAUACUGCCCUGCUUUUAUACAUACAUACAUACAUACCUAUAUCGUGCAUAUAUCUACCACAU	#N/A	#N/A	#N/A	#N/A	#N/A
hsa-mir-4536-2	MI0019149	ChrX	55451495	55451582	+	AUGUGGUAGAUAUAUGCACGAUAUAGGUAUGUAUGUAUGUAUGUAUAAAAGCAGGGCAGUAUAUAUAUCGUGCAUAUAUCUACCACAU	#N/A	#N/A	#N/A	#N/A	#N/A
hsa-mir-374a	MI0000782	ChrX	74287286	74287357	-	UACAUCGGCCAUUAUAAUACAACCUGAUAAGUGUUAUAGCACUUAUCAGAUUGUAUUGUAAUUGUCUGUGUA	#N/A	#N/A	#N/A	#N/A	#N/A
hsa-mir-545	MI0003516	ChrX	74287104	74287209	-	CCCAGCCUGGCACAUUAGUAGGCCUCAGUAAAUGUUUAUUAGAUGAAUAAAUGAAUGACUCAUCAGCAAACAUUUAUUGUGUGCCUGCUAAAGUGAGCUCCACAGG	#N/A	#N/A	#N/A	#N/A	#N/A
hsa-mir-1912	MI0008333	ChrX	114651544	114651623	+	CUCUAGGAUGUGCUCAUUGCAUGGGCUGUGUAUAGUAUUAUUCAAUACCCAGAGCAUGCAGUGUGAACAUAAUAGAGAUU	#N/A	#N/A	#N/A	#N/A	#N/A
hsa-mir-1264	MI0003758	ChrX	114652655	114652723	+	AGGUCCUCAAUAAGUAUUUGUUGAAAGAAUAAAUAAACCAACAAGUCUUAUUUGAGCACCUGUUAUGUG	#N/A	#N/A	#N/A	#N/A	#N/A
hsa-mir-513b	MI0006648	ChrX	147199044	147199127	-	GUGUACAGUGCCUUUCACAAGGAGGUGUCAUUUAUGUGAACUAAAAUAUAAAUGUCACCUUUUUGAGAGGAGUAAUGUACAGCA	#N/A	#N/A	#N/A	#N/A	#N/A
hsa-mir-513c	MI0006649	ChrX	147189704	147189787	-	GCGUACAGUGCCUUUCUCAAGGAGGUGUCGUUUAUGUGAACUAAAAUAUAAAUUUCACCUUUCUGAGAAGAGUAAUGUACAGCA	#N/A	#N/A	#N/A	#N/A	#N/A
hsa-mir-452	MI0001733	ChrX	151959628	151959712	-	GCUAAGCACUUACAACUGUUUGCAGAGGAAACUGAGACUUUGUAACUAUGUCUCAGUCUCAUCUGCAAAGAAGUAAGUGCUUUGC	-1.65279	6.16159	120.363	5.26762e-28	8.02739e-27
hsa-mir-224	MI0000301	ChrX	151958578	151958658	-	GGGCUUUCAAGUCACUAGUGGUUCCGUUUAGUAGAUGAUUGUGCAUUGUUUCAAAAUGGUGCCCUAGUGACUACAAAGCCC	#N/A	#N/A	#N/A	#N/A	#N/A
hsa-mir-3202-1	MI0014252	ChrX	153981097	153981177	+	UAUUAAUAUGGAAGGGAGAAGAGCUUUAAUGAUUGGAGUCAUUUUCAGAGCAUUAAAGCUCUUCUCCCUUCCAUAUUAAUG	#N/A	#N/A	#N/A	#N/A	#N/A
hsa-mir-3202-2	MI0014253	ChrX	153981098	153981176	-	AUUAAUAUGGAAGGGAGAAGAGCUUUAAUGCUCUGAAAAUGACUCCAAUCAUUAAAGCUCUUCUCCCUUCCAUAUUAAU	#N/A	#N/A	#N/A	#N/A	#N/A

## Sheet: CESC
ID	Accession	Chromosome	Start	End	Strand	Sequence	logFC	logCPM	LR	PValue	FDR
hsa-mir-512-1	MI0003140	Chr19	53666679	53666762	+	UCUCAGUCUGUGGCACUCAGCCUUGAGGGCACUUUCUGGUGCCAGAAUGAAAGUGCUGUCAUAGCUGAGGUCCAAUGACUGAGG	#N/A	#N/A	#N/A	#N/A	#N/A
hsa-mir-512-2	MI0003141	Chr19	53669157	53669254	+	GGUACUUCUCAGUCUGUGGCACUCAGCCUUGAGGGCACUUUCUGGUGCCAGAAUGAAAGUGCUGUCAUAGCUGAGGUCCAAUGACUGAGGCGAGCACC	#N/A	#N/A	#N/A	#N/A	#N/A
hsa-mir-520d	MI0003164	Chr19	53720096	53720182	+	UCUCAAGCUGUGAGUCUACAAAGGGAAGCCCUUUCUGUUGUCUAAAAGAAAAGAAAGUGCUUCUCUUUGGUGGGUUACGGUUUGAGA	#N/A	#N/A	#N/A	#N/A	#N/A
hsa-mir-516b-2	MI0003167	Chr19	53725442	53725526	+	UCUCAUGAUGUGACCAUCUGGAGGUAAGAAGCACUUUGUGUUUUGUGAAAGAAAGUGCUUCCUUUCAGAGGGUUACUCUUUGAGA	#N/A	#N/A	#N/A	#N/A	#N/A
hsa-mir-526a-2	MI0003168	Chr19	53726922	53726986	+	GUGACCCUCUAGAGGGAAGCACUUUCUGUUGAAAGAAAAGAACAUGCAUCCUUUCAGAGGGUUAC	#N/A	#N/A	#N/A	#N/A	#N/A
hsa-mir-518a-1	MI0003170	Chr19	53731006	53731090	+	UCUCAAGCUGUGACUGCAAAGGGAAGCCCUUUCUGUUGUCUGAAAGAAGAGAAAGCGCUUCCCUUUGCUGGAUUACGGUUUGAGA	#N/A	#N/A	#N/A	#N/A	#N/A
hsa-mir-518d	MI0003171	Chr19	53734877	53734963	+	UCCCAUGCUGUGACCCUCUAGAGGGAAGCACUUUCUGUUGUCUGAAAGAAACCAAAGCGCUUCCCUUUGGAGCGUUACGGUUUGAGA	#N/A	#N/A	#N/A	#N/A	#N/A
hsa-mir-516b-1	MI0003172	Chr19	53736845	53736934	+	UCUCAGGCUGUGACCAUCUGGAGGUAAGAAGCACUUUCUGUUUUGUGAAAGAAAAGAAAGUGCUUCCUUUCAGAGGGUUACUCUUUGAGA	#N/A	#N/A	#N/A	#N/A	#N/A
hsa-mir-518a-2	MI0003173	Chr19	53739333	53739419	+	UCUCAAGCUGUGGGUCUGCAAAGGGAAGCCCUUUCUGUUGUCUAAAAGAAGAGAAAGCGCUUCCCUUUGCUGGAUUACGGUUUGAGA	#N/A	#N/A	#N/A	#N/A	#N/A
hsa-mir-521-1	MI0003176	Chr19	53748636	53748722	+	UCUCAGGCUGUGACCCUCCAAAGGGAAGAACUUUCUGUUGUCUAAAAGAAAAGAACGCACUUCCCUUUAGAGUGUUACCGUGUGAGA	#N/A	#N/A	#N/A	#N/A	#N/A
hsa-mir-517a	MI0003161	Chr19	53712268	53712354	+	UCUCAGGCAGUGACCCUCUAGAUGGAAGCACUGUCUGUUGUAUAAAAGAAAAGAUCGUGCAUCCCUUUAGAGUGUUACUGUUUGAGA	#N/A	#N/A	#N/A	#N/A	#N/A
hsa-mir-517b	MI0003165	Chr19	53721076	53721142	+	GUGACCCUCUAGAUGGAAGCACUGUCUGUUGUCUAAGAAAAGAUCGUGCAUCCCUUUAGAGUGUUAC	#N/A	#N/A	#N/A	#N/A	#N/A
hsa-mir-526b	MI0003150	Chr19	53694393	53694475	+	UCAGGCUGUGACCCUCUUGAGGGAAGCACUUUCUGUUGUCUGAAAGAAGAGAAAGUGCUUCCUUUUAGAGGCUUACUGUCUGA	#N/A	#N/A	#N/A	#N/A	#N/A
hsa-mir-517c	MI0003174	Chr19	53741313	53741407	+	GAAGAUCUCAGGCAGUGACCCUCUAGAUGGAAGCACUGUCUGUUGUCUAAGAAAAGAUCGUGCAUCCUUUUAGAGUGUUACUGUUUGAGAAAAUC	#N/A	#N/A	#N/A	#N/A	#N/A
hsa-mir-524	MI0003160	Chr19	53711002	53711088	+	UCUCAUGCUGUGACCCUACAAAGGGAAGCACUUUCUCUUGUCCAAAGGAAAAGAAGGCGCUUCCCUUUGGAGUGUUACGGUUUGAGA	#N/A	#N/A	#N/A	#N/A	#N/A
hsa-mir-518e	MI0003169	Chr19	53729838	53729925	+	UCUCAGGCUGUGACCCUCUAGAGGGAAGCGCUUUCUGUUGGCUAAAAGAAAAGAAAGCGCUUCCCUUCAGAGUGUUAACGCUUUGAGA	#N/A	#N/A	#N/A	#N/A	#N/A
hsa-mir-519d	MI0003162	Chr19	53713347	53713434	+	UCCCAUGCUGUGACCCUCCAAAGGGAAGCGCUUUCUGUUUGUUUUCUCUUAAACAAAGUGCCUCCCUUUAGAGUGUUACCGUUUGGGA	#N/A	#N/A	#N/A	#N/A	#N/A
hsa-mir-523	MI0003153	Chr19	53698385	53698471	+	UCUCAUGCUGUGACCCUCUAGAGGGAAGCGCUUUCUGUUGUCUGAAAGAAAAGAACGCGCUUCCCUAUAGAGGGUUACCCUUUGAGA	#N/A	#N/A	#N/A	#N/A	#N/A
hsa-mir-520f	MI0003146	Chr19	53682159	53682245	+	UCUCAGGCUGUGACCCUCUAAAGGGAAGCGCUUUCUGUGGUCAGAAAGAAAAGCAAGUGCUUCCUUUUAGAGGGUUACCGUUUGGGA	#N/A	#N/A	#N/A	#N/A	#N/A
hsa-mir-520a	MI0003149	Chr19	53690881	53690965	+	CUCAGGCUGUGACCCUCCAGAGGGAAGUACUUUCUGUUGUCUGAGAGAAAAGAAAGUGCUUCCCUUUGGACUGUUUCGGUUUGAG	#N/A	#N/A	#N/A	#N/A	#N/A
hsa-mir-518c	MI0003159	Chr19	53708735	53708835	+	GCGAGAAGAUCUCAUGCUGUGACUCUCUGGAGGGAAGCACUUUCUGUUGUCUGAAAGAAAACAAAGCGCUUCUCUUUAGAGUGUUACGGUUUGAGAAAAGC	#N/A	#N/A	#N/A	#N/A	#N/A
hsa-mir-520c	MI0003158	Chr19	53707453	53707539	+	UCUCAGGCUGUCGUCCUCUAGAGGGAAGCACUUUCUGUUGUCUGAAAGAAAAGAAAGUGCUUCCUUUUAGAGGGUUACCGUUUGAGA	#N/A	#N/A	#N/A	#N/A	#N/A
hsa-mir-518f	MI0003154	Chr19	53700015	53700101	+	UCUCAUGCUGUGACCCUCUAGAGGGAAGCACUUUCUCUUGUCUAAAAGAAAAGAAAGCGCUUCUCUUUAGAGGAUUACUCUUUGAGA	#N/A	#N/A	#N/A	#N/A	#N/A
hsa-mir-518b	MI0003156	Chr19	53702737	53702819	+	UCAUGCUGUGGCCCUCCAGAGGGAAGCGCUUUCUGUUGUCUGAAAGAAAACAAAGCGCUCCCCUUUAGAGGUUUACGGUUUGA	#N/A	#N/A	#N/A	#N/A	#N/A
hsa-mir-515-1	MI0003144	Chr19	53679003	53679085	+	UCUCAUGCAGUCAUUCUCCAAAAGAAAGCACUUUCUGUUGUCUGAAAGCAGAGUGCCUUCUUUUGGAGCGUUACUGUUUGAGA	#N/A	#N/A	#N/A	#N/A	#N/A
hsa-mir-515-2	MI0003147	Chr19	53685009	53685091	+	UCUCAUGCAGUCAUUCUCCAAAAGAAAGCACUUUCUGUUGUCUGAAAGCAGAGUGCCUUCUUUUGGAGCGUUACUGUUUGAGA	#N/A	#N/A	#N/A	#N/A	#N/A
hsa-mir-1323	MI0003786	Chr19	53671968	53672040	+	ACUGAGGUCCUCAAAACUGAGGGGCAUUUUCUGUGGUUUGAAAGGAAAGUGCACCCAGUUUUGGGGAUGUCAA	#N/A	#N/A	#N/A	#N/A	#N/A
hsa-mir-525	MI0003152	Chr19	53697533	53697617	+	CUCAAGCUGUGACUCUCCAGAGGGAUGCACUUUCUCUUAUGUGAAAAAAAAGAAGGCGCUUCCCUUUAGAGCGUUACGGUUUGGG	#N/A	#N/A	#N/A	#N/A	#N/A
hsa-mir-519b	MI0003151	Chr19	53695213	53695293	+	CAUGCUGUGACCCUCUAGAGGGAAGCGCUUUCUGUUGUCUGAAAGAAAAGAAAGUGCAUCCUUUUAGAGGUUUACUGUUUG	#N/A	#N/A	#N/A	#N/A	#N/A
hsa-mir-522	MI0003177	Chr19	53751211	53751297	+	UCUCAGGCUGUGUCCCUCUAGAGGGAAGCGCUUUCUGUUGUCUGAAAGAAAAGAAAAUGGUUCCCUUUAGAGUGUUACGCUUUGAGA	#N/A	#N/A	#N/A	#N/A	#N/A
hsa-mir-519a-2	MI0003182	Chr19	53762344	53762430	+	UCUCAGGCUGUGUCCCUCUACAGGGAAGCGCUUUCUGUUGUCUGAAAGAAAGGAAAGUGCAUCCUUUUAGAGUGUUACUGUUUGAGA	#N/A	#N/A	#N/A	#N/A	#N/A
hsa-mir-520b	MI0003155	Chr19	53701227	53701287	+	CCCUCUACAGGGAAGCGCUUUCUGUUGUCUGAAAGAAAAGAAAGUGCUUCCUUUUAGAGGG	#N/A	#N/A	#N/A	#N/A	#N/A
hsa-mir-519e	MI0003145	Chr19	53679940	53680023	+	UCUCAUGCAGUCAUUCUCCAAAAGGGAGCACUUUCUGUUUGAAAGAAAACAAAGUGCCUCCUUUUAGAGUGUUACUGUUUGAGA	#N/A	#N/A	#N/A	#N/A	#N/A
hsa-mir-519a-1	MI0003178	Chr19	53752397	53752481	+	CUCAGGCUGUGACACUCUAGAGGGAAGCGCUUUCUGUUGUCUGAAAGAAAGGAAAGUGCAUCCUUUUAGAGUGUUACUGUUUGAG	#N/A	#N/A	#N/A	#N/A	#N/A
hsa-mir-521-2	MI0003163	Chr19	53716594	53716680	+	UCUCGGGCUGUGACUCUCCAAAGGGAAGAAUUUUCUCUUGUCUAAAAGAAAAGAACGCACUUCCCUUUAGAGUGUUACCGUGUGAGA	#N/A	#N/A	#N/A	#N/A	#N/A
hsa-mir-519c	MI0003148	Chr19	53686469	53686555	+	UCUCAGCCUGUGACCCUCUAGAGGGAAGCGCUUUCUGUUGUCUGAAAGAAAAGAAAGUGCAUCUUUUUAGAGGAUUACAGUUUGAGA	#N/A	#N/A	#N/A	#N/A	#N/A
hsa-mir-520g	MI0003166	Chr19	53722166	53722255	+	UCCCAUGCUGUGACCCUCUAGAGGAAGCACUUUCUGUUUGUUGUCUGAGAAAAAACAAAGUGCUUCCCUUUAGAGUGUUACCGUUUGGGA	#N/A	#N/A	#N/A	#N/A	#N/A
hsa-mir-520h	MI0003175	Chr19	53742512	53742599	+	UCCCAUGCUGUGACCCUCUAGAGGAAGCACUUUCUGUUUGUUGUCUGAGAAAAAACAAAGUGCUUCCCUUUAGAGUUACUGUUUGGGA	#N/A	#N/A	#N/A	#N/A	#N/A
hsa-mir-526a-1	MI0003157	Chr19	53706252	53706336	+	CUCAGGCUGUGACCCUCUAGAGGGAAGCACUUUCUGUUGCUUGAAAGAAGAGAAAGCGCUUCCUUUUAGAGGAUUACUCUUUGAG	#N/A	#N/A	#N/A	#N/A	#N/A
hsa-mir-527	MI0003179	Chr19	53754018	53754102	+	UCUCAAGCUGUGACUGCAAAGGGAAGCCCUUUCUGUUGUCUAAAAGAAAAGAAAGUGCUUCCCUUUGGUGAAUUACGGUUUGAGA	#N/A	#N/A	#N/A	#N/A	#N/A
hsa-mir-516a-1	MI0003180	Chr19	53756741	53756830	+	UCUCAGGCUGUGACCUUCUCGAGGAAAGAAGCACUUUCUGUUGUCUGAAAGAAAAGAAAGUGCUUCCUUUCAGAGGGUUACGGUUUGAGA	#N/A	#N/A	#N/A	#N/A	#N/A
hsa-mir-516a-2	MI0003181	Chr19	53761133	53761222	+	UCUCAGGUUGUGACCUUCUCGAGGAAAGAAGCACUUUCUGUUGUCUGAAAGAAAAGAAAGUGCUUCCUUUCAGAGGGUUACGGUUUGAGA	#N/A	#N/A	#N/A	#N/A	#N/A
hsa-mir-520e	MI0003143	Chr19	53675711	53675797	+	UCUCCUGCUGUGACCCUCAAGAUGGAAGCAGUUUCUGUUGUCUGAAAGGAAAGAAAGUGCUUCCUUUUUGAGGGUUACUGUUUGAGA	#N/A	#N/A	#N/A	#N/A	#N/A
hsa-mir-498	MI0003142	Chr19	53674197	53674320	+	AACCCUCCUUGGGAAGUGAAGCUCAGGCUGUGAUUUCAAGCCAGGGGGCGUUUUUCUAUAACUGGAUGAAAAGCACCUCCAGAGCUUGAAGCUCACAGUUUGAGAGCAAUCGUCUAAGGAAGUU	#N/A	#N/A	#N/A	#N/A	#N/A
hsa-mir-1283-2	MI0006430	Chr19	53758232	53758318	+	CUCAAGCUGUGAGUCUACAAAGGAAAGCGCUUUCUGUUGUCUGAAAGAAAAGAAAUCGCUUCCCUUUGGAGUGUUACGGUUUGAGAA	#N/A	#N/A	#N/A	#N/A	#N/A
hsa-mir-1283-1	MI0003832	Chr19	53688481	53688567	+	CUCAAGCUAUGAGUCUACAAAGGAAAGCGCUUUCUGUUGUCAGAAAGAAGAGAAAGCGCUUCCCUUUUGAGGGUUACGGUUUGAGAA	#N/A	#N/A	#N/A	#N/A	#N/A
hsa-mir-379	MI0000787	Chr14	101022066	101022132	+	AGAGAUGGUAGACUAUGGAACGUAGGCGUUAUGAUUUCUGACCUAUGUAACAUGGUCCACUAACUCU	#N/A	#N/A	#N/A	#N/A	#N/A
hsa-mir-411	MI0003675	Chr14	101023325	101023420	+	UGGUACUUGGAGAGAUAGUAGACCGUAUAGCGUACGCUUUAUCUGUGACGUAUGUAACACGGUCCACUAACCCUCAGUAUCAAAUCCAUCCCCGAG	#N/A	#N/A	#N/A	#N/A	#N/A
hsa-mir-299	MI0000744	Chr14	101023794	101023856	+	AAGAAAUGGUUUACCGUCCCACAUACAUUUUGAAUAUGUAUGUGGGAUGGUAAACCGCUUCUU	#N/A	#N/A	#N/A	#N/A	#N/A
hsa-mir-380	MI0000788	Chr14	101025017	101025077	+	AAGAUGGUUGACCAUAGAACAUGCGCUAUCUCUGUGUCGUAUGUAAUAUGGUCCACAUCUU	#N/A	#N/A	#N/A	#N/A	#N/A
hsa-mir-1197	MI0006656	Chr14	101025564	101025651	+	ACUUCCUGGUAUUUGAAGAUGCGGUUGACCAUGGUGUGUACGCUUUAUUUGUGACGUAGGACACAUGGUCUACUUCUUCUCAAUAUCA	#N/A	#N/A	#N/A	#N/A	#N/A
hsa-mir-323a	MI0000807	Chr14	101025732	101025817	+	UUGGUACUUGGAGAGAGGUGGUCCGUGGCGCGUUCGCUUUAUUUAUGGCGCACAUUACACGGUCGACCUCUUUGCAGUAUCUAAUC	#N/A	#N/A	#N/A	#N/A	#N/A
hsa-mir-758	MI0003757	Chr14	101026020	101026107	+	GCCUGGAUACAUGAGAUGGUUGACCAGAGAGCACACGCUUUAUUUGUGCCGUUUGUGACCUGGUCCACUAACCCUCAGUAUCUAAUGC	#N/A	#N/A	#N/A	#N/A	#N/A
hsa-mir-329-1	MI0001725	Chr14	101026785	101026864	+	GGUACCUGAAGAGAGGUUUUCUGGGUUUCUGUUUCUUUAAUGAGGACGAAACACACCUGGUUAACCUCUUUUCCAGUAUC	#N/A	#N/A	#N/A	#N/A	#N/A
hsa-mir-329-2	MI0001726	Chr14	101027100	101027183	+	GUGGUACCUGAAGAGAGGUUUUCUGGGUUUCUGUUUCUUUAUUGAGGACGAAACACACCUGGUUAACCUCUUUUCCAGUAUCAA	#N/A	#N/A	#N/A	#N/A	#N/A
hsa-mir-494	MI0003134	Chr14	101029634	101029714	+	GAUACUCGAAGGAGAGGUUGUCCGUGUUGUCUUCUCUUUAUUUAUGAUGAAACAUACACGGGAAACCUCUUUUUUAGUAUC	#N/A	#N/A	#N/A	#N/A	#N/A
hsa-mir-1193	MI0014205	Chr14	101030052	101030129	+	GUAGCUGAGGGGAUGGUAGACCGGUGACGUGCACUUCAUUUACGAUGUAGGUCACCCGUUUGACUAUCCACCAGCGCC	#N/A	#N/A	#N/A	#N/A	#N/A
hsa-mir-543	MI0005565	Chr14	101031987	101032064	+	UACUUAAUGAGAAGUUGCCCGUGUUUUUUUCGCUUUAUUUGUGACGAAACAUUCGCGGUGCACUUCUUUUUCAGUAUC	#N/A	#N/A	#N/A	#N/A	#N/A
hsa-mir-495	MI0003135	Chr14	101033755	101033836	+	UGGUACCUGAAAAGAAGUUGCCCAUGUUAUUUUCGCUUUAUAUGUGACGAAACAAACAUGGUGCACUUCUUUUUCGGUAUCA	#N/A	#N/A	#N/A	#N/A	#N/A
hsa-mir-376c	MI0000776	Chr14	101039690	101039755	+	AAAAGGUGGAUAUUCCUUCUAUGUUUAUGUUAUUUAUGGUUAAACAUAGAGGAAAUUCCACGUUUU	#N/A	#N/A	#N/A	#N/A	#N/A
hsa-mir-376a-2	MI0003529	Chr14	101040069	101040148	+	GGUAUUUAAAAGGUAGAUUUUCCUUCUAUGGUUACGUGUUUGAUGGUUAAUCAUAGAGGAAAAUCCACGUUUUCAGUAUC	#N/A	#N/A	#N/A	#N/A	#N/A
hsa-mir-654	MI0003676	Chr14	101040219	101040299	+	GGGUAAGUGGAAAGAUGGUGGGCCGCAGAACAUGUGCUGAGUUCGUGCCAUAUGUCUGCUGACCAUCACCUUUAGAAGCCC	#N/A	#N/A	#N/A	#N/A	#N/A
hsa-mir-376b	MI0002466	Chr14	101040436	101040535	+	CAGUCCUUCUUUGGUAUUUAAAACGUGGAUAUUCCUUCUAUGUUUACGUGAUUCCUGGUUAAUCAUAGAGGAAAAUCCAUGUUUUCAGUAUCAAAUGCUG	#N/A	#N/A	#N/A	#N/A	#N/A
hsa-mir-376a-1	MI0000784	Chr14	101040782	101040849	+	UAAAAGGUAGAUUCUCCUUCUAUGAGUACAUUAUUUAUGAUUAAUCAUAGAGGAAAAUCCACGUUUUC	#N/A	#N/A	#N/A	#N/A	#N/A
hsa-mir-300	MI0005525	Chr14	101041363	101041445	+	UGCUACUUGAAGAGAGGUAAUCCUUCACGCAUUUGCUUUACUUGCAAUGAUUAUACAAGGGCAGACUCUCUCUGGGGAGCAAA	#N/A	#N/A	#N/A	#N/A	#N/A
hsa-mir-1185-1	MI0003844	Chr14	101042977	101043062	+	UUUGGUACUUGAAGAGAGGAUACCCUUUGUAUGUUCACUUGAUUAAUGGCGAAUAUACAGGGGGAGACUCUUAUUUGCGUAUCAAA	#N/A	#N/A	#N/A	#N/A	#N/A
hsa-mir-1185-2	MI0003821	Chr14	101044198	101044283	+	UUUGGUACUUAAAGAGAGGAUACCCUUUGUAUGUUCACUUGAUUAAUGGCGAAUAUACAGGGGGAGACUCUCAUUUGCGUAUCAAA	#N/A	#N/A	#N/A	#N/A	#N/A
hsa-mir-381	MI0000789	Chr14	101045920	101045994	+	UACUUAAAGCGAGGUUGCCCUUUGUAUAUUCGGUUUAUUGACAUGGAAUAUACAAGGGCAAGCUCUCUGUGAGUA	#N/A	#N/A	#N/A	#N/A	#N/A
hsa-mir-487b	MI0003530	Chr14	101046455	101046538	+	UUGGUACUUGGAGAGUGGUUAUCCCUGUCCUGUUCGUUUUGCUCAUGUCGAAUCGUACAGGGUCAUCCACUUUUUCAGUAUCAA	#N/A	#N/A	#N/A	#N/A	#N/A
hsa-mir-539	MI0003514	Chr14	101047321	101047398	+	AUACUUGAGGAGAAAUUAUCCUUGGUGUGUUCGCUUUAUUUAUGAUGAAUCAUACAAGGACAAUUUCUUUUUGAGUAU	#N/A	#N/A	#N/A	#N/A	#N/A
hsa-mir-889	MI0005540	Chr14	101047901	101047979	+	GUGCUUAAAGAAUGGCUGUCCGUAGUAUGGUCUCUAUAUUUAUGAUGAUUAAUAUCGGACAACCAUUGUUUUAGUAUCC	#N/A	#N/A	#N/A	#N/A	#N/A
hsa-mir-544a	MI0003515	Chr14	101048658	101048748	+	AUUUUCAUCACCUAGGGAUCUUGUUAAAAAGCAGAUUCUGAUUCAGGGACCAAGAUUCUGCAUUUUUAGCAAGUUCUCAAGUGAUGCUAAU	#N/A	#N/A	#N/A	#N/A	#N/A
hsa-mir-655	MI0003677	Chr14	101049550	101049646	+	AACUAUGCAAGGAUAUUUGAGGAGAGGUUAUCCGUGUUAUGUUCGCUUCAUUCAUCAUGAAUAAUACAUGGUUAACCUCUUUUUGAAUAUCAGACUC	#N/A	#N/A	#N/A	#N/A	#N/A
hsa-mir-487a	MI0002471	Chr14	101052446	101052525	+	GGUACUUGAAGAGUGGUUAUCCCUGCUGUGUUCGCUUAAUUUAUGACGAAUCAUACAGGGACAUCCAGUUUUUCAGUAUC	#N/A	#N/A	#N/A	#N/A	#N/A
hsa-mir-382	MI0000790	Chr14	101054306	101054381	+	UACUUGAAGAGAAGUUGUUCGUGGUGGAUUCGCUUUACUUAUGACGAAUCAUUCACGGACAACACUUUUUUCAGUA	#N/A	#N/A	#N/A	#N/A	#N/A
hsa-mir-134	MI0000474	Chr14	101054687	101054759	+	CAGGGUGUGUGACUGGUUGACCAGAGGGGCAUGCACUGUGUUCACCCUGUGGGCCACCUAGUCACCAACCCUC	#N/A	#N/A	#N/A	#N/A	#N/A
hsa-mir-668	MI0003761	Chr14	101055258	101055323	+	GGUAAGUGCGCCUCGGGUGAGCAUGCACUUAAUGUGGGUGUAUGUCACUCGGCUCGGCCCACUACC	#N/A	#N/A	#N/A	#N/A	#N/A
hsa-mir-485	MI0002469	Chr14	101055419	101055491	+	ACUUGGAGAGAGGCUGGCCGUGAUGAAUUCGAUUCAUCAAAGCGAGUCAUACACGGCUCUCCUCUCUUUUAGU	#N/A	#N/A	#N/A	#N/A	#N/A
hsa-mir-323b	MI0014206	Chr14	101056219	101056300	+	UGGUACUCGGAGGGAGGUUGUCCGUGGUGAGUUCGCAUUAUUUAAUGAUGCCCAAUACACGGUCGACCUCUUUUCGGUAUCA	#N/A	#N/A	#N/A	#N/A	#N/A
hsa-mir-154	MI0000480	Chr14	101059755	101059838	+	GUGGUACUUGAAGAUAGGUUAUCCGUGUUGCCUUCGCUUUAUUUGUGACGAAUCAUACACGGUUGACCUAUUUUUCAGUACCAA	#N/A	#N/A	#N/A	#N/A	#N/A
hsa-mir-496	MI0003136	Chr14	101060573	101060674	+	CCCAAGUCAGGUACUCGAAUGGAGGUUGUCCAUGGUGUGUUCAUUUUAUUUAUGAUGAGUAUUACAUGGCCAAUCUCCUUUCGGUACUCAAUUCUUCUUGGG	#N/A	#N/A	#N/A	#N/A	#N/A
hsa-mir-377	MI0000785	Chr14	101062050	101062118	+	UUGAGCAGAGGUUGCCCUUGGUGAAUUCGCUUUAUUUAUGUUGAAUCACACAAAGGCAACUUUUGUUUG	#N/A	#N/A	#N/A	#N/A	#N/A
hsa-mir-541	MI0005539	Chr14	101064495	101064578	+	ACGUCAGGGAAAGGAUUCUGCUGUCGGUCCCACUCCAAAGUUCACAGAAUGGGUGGUGGGCACAGAAUCUGGACUCUGCUUGUG	#N/A	#N/A	#N/A	#N/A	#N/A
hsa-mir-409	MI0001735	Chr14	101065300	101065378	+	UGGUACUCGGGGAGAGGUUACCCGAGCAACUUUGCAUCUGGACGACGAAUGUUGCUCGGUGAACCCCUUUUCGGUAUCA	#N/A	#N/A	#N/A	#N/A	#N/A
hsa-mir-412	MI0002464	Chr14	101065447	101065537	+	CUGGGGUACGGGGAUGGAUGGUCGACCAGUUGGAAAGUAAUUGUUUCUAAUGUACUUCACCUGGUCCACUAGCCGUCCGUAUCCGCUGCAG	#N/A	#N/A	#N/A	#N/A	#N/A
hsa-mir-369	MI0000777	Chr14	101065598	101065667	+	UUGAAGGGAGAUCGACCGUGUUAUAUUCGCUUUAUUGACUUCGAAUAAUACAUGGUUGAUCUUUUCUCAG	#N/A	#N/A	#N/A	#N/A	#N/A
hsa-mir-410	MI0002465	Chr14	101065912	101065991	+	GGUACCUGAGAAGAGGUUGUCUGUGAUGAGUUCGCUUUUAUUAAUGACGAAUAUAACACAGAUGGCCUGUUUUCAGUACC	#N/A	#N/A	#N/A	#N/A	#N/A
hsa-mir-656	MI0003678	Chr14	101066724	101066801	+	CUGAAAUAGGUUGCCUGUGAGGUGUUCACUUUCUAUAUGAUGAAUAUUAUACAGUCAACCUCUUUCCGAUAUCGAAUC	#N/A	#N/A	#N/A	#N/A	#N/A
hsa-mir-493	MI0003132	Chr14	100869060	100869148	+	CUGGCCUCCAGGGCUUUGUACAUGGUAGGCUUUCAUUCAUUCGUUUGCACAUUCGGUGAAGGUCUACUGUGUGCCAGGCCCUGUGCCAG	#N/A	#N/A	#N/A	#N/A	#N/A
hsa-mir-337	MI0000806	Chr14	100874493	100874585	+	GUAGUCAGUAGUUGGGGGGUGGGAACGGCUUCAUACAGGAGUUGAUGCACAGUUAUCCAGCUCCUAUAUGAUGCCUUUCUUCAUCCCCUUCAA	#N/A	#N/A	#N/A	#N/A	#N/A
hsa-mir-665	MI0005563	Chr14	100875033	100875104	+	UCUCCUCGAGGGGUCUCUGCCUCUACCCAGGACUCUUUCAUGACCAGGAGGCUGAGGCCCCUCACAGGCGGC	#N/A	#N/A	#N/A	#N/A	#N/A
hsa-mir-431	MI0001721	Chr14	100881007	100881120	+	UCCUGCUUGUCCUGCGAGGUGUCUUGCAGGCCGUCAUGCAGGCCACACUGACGGUAACGUUGCAGGUCGUCUUGCAGGGCUUCUCGCAAGACGACAUCCUCAUCACCAACGACG	#N/A	#N/A	#N/A	#N/A	#N/A
hsa-mir-433	MI0001723	Chr14	100881886	100881978	+	CCGGGGAGAAGUACGGUGAGCCUGUCAUUAUUCAGAGAGGCUAGAUCCUCUGUGUUGAGAAGGAUCAUGAUGGGCUCCUCGGUGUUCUCCAGG	#N/A	#N/A	#N/A	#N/A	#N/A
hsa-mir-127	MI0000472	Chr14	100882979	100883075	+	UGUGAUCACUGUCUCCAGCCUGCUGAAGCUCAGAGGGCUCUGAUUCAGAAAGAUCAUCGGAUCCGUCUGAGCUUGGCUGGUCGGAAGUCUCAUCAUC	#N/A	#N/A	#N/A	#N/A	#N/A
hsa-mir-432	MI0003133	Chr14	100884483	100884576	+	UGACUCCUCCAGGUCUUGGAGUAGGUCAUUGGGUGGAUCCUCUAUUUCCUUACGUGGGCCACUGGAUGGCUCCUCCAUGUCUUGGAGUAGAUCA	#N/A	#N/A	#N/A	#N/A	#N/A
hsa-mir-136	MI0000475	Chr14	100884702	100884783	+	UGAGCCCUCGGAGGACUCCAUUUGUUUUGAUGAUGGAUUCUUAUGCUCCAUCAUCGUCUCAAAUGAGUCUUCAGAGGGUUCU	#N/A	#N/A	#N/A	#N/A	#N/A
hsa-mir-532	MI0003205	ChrX	50003148	50003238	+	CGACUUGCUUUCUCUCCUCCAUGCCUUGAGUGUAGGACCGUUGGCAUCUUAAUUACCCUCCCACACCCAAGGCUUGCAGAAGAGCGAGCCU	#N/A	#N/A	#N/A	#N/A	#N/A
hsa-mir-188	MI0000484	ChrX	50003503	50003588	+	UGCUCCCUCUCUCACAUCCCUUGCAUGGUGGAGGGUGAGCUUUCUGAAAACCCCUCCCACAUGCAGGGUUUGCAGGAUGGCGAGCC	#N/A	#N/A	#N/A	#N/A	#N/A
hsa-mir-500a	MI0003184	ChrX	50008431	50008514	+	GCUCCCCCUCUCUAAUCCUUGCUACCUGGGUGAGAGUGCUGUCUGAAUGCAAUGCACCUGGGCAAGGAUUCUGAGAGCGAGAGC	#N/A	#N/A	#N/A	#N/A	#N/A
hsa-mir-362	MI0000762	ChrX	50008964	50009028	+	CUUGAAUCCUUGGAACCUAGGUGUGAGUGCUAUUUCAGUGCAACACACCUAUUCAAGGAUUCAAA	#N/A	#N/A	#N/A	#N/A	#N/A
hsa-mir-501	MI0003185	ChrX	50009722	50009805	+	GCUCUUCCUCUCUAAUCCUUUGUCCCUGGGUGAGAGUGCUUUCUGAAUGCAAUGCACCCGGGCAAGGAUUCUGAGAGGGUGAGC	#N/A	#N/A	#N/A	#N/A	#N/A
hsa-mir-500b	MI0015903	ChrX	50010672	50010750	+	CCCCCUCUCUAAUCCUUGCUACCUGGGUGAGAGUGCUUUCUGAAUGCAGUGCACCCAGGCAAGGAUUCUGCAAGGGGGA	#N/A	#N/A	#N/A	#N/A	#N/A
hsa-mir-660	MI0003684	ChrX	50013241	50013337	+	CUGCUCCUUCUCCCAUACCCAUUGCAUAUCGGAGUUGUGAAUUCUCAAAACACCUCCUGUGUGCAUGGAUUACAGGAGGGUGAGCCUUGUCAUCGUG	#N/A	#N/A	#N/A	#N/A	#N/A
hsa-mir-502	MI0003186	ChrX	50014598	50014683	+	UGCUCCCCCUCUCUAAUCCUUGCUAUCUGGGUGCUAGUGCUGGCUCAAUGCAAUGCACCUGGGCAAGGAUUCAGAGAGGGGGAGCU	#N/A	#N/A	#N/A	#N/A	#N/A
hsa-mir-3689f	MI0016837	Chr9	134850742	134850807	-	AGGUGUGAUAUCGUGCUUCCUGGGACGUGUGAUGCUGUGCUUCCUGGGAGGUGUGAUCCCACACUC	#N/A	#N/A	#N/A	#N/A	#N/A
hsa-mir-3689e	MI0016836	Chr9	134850570	134850641	-	GGGAGGUGUGAUAUCAUGGUUCCUGGGAGGUAUGAUAUCGUGGUUCCUGGGAGGUGUGAUCCCGUGCUCCCU	#N/A	#N/A	#N/A	#N/A	#N/A
hsa-mir-3689d-2	MI0016835	Chr9	134850277	134850356	-	ACUGGGAGGUGUGAUCUCACACUCGCUGGGAGGUGUGCUAUCGUCUUCCCUGGGAGGUGUGAUCCUGUUCUUCCUGAGCG	#N/A	#N/A	#N/A	#N/A	#N/A
hsa-mir-3689b	MI0016411	Chr9	134850125	134850272	-	GAUCCUGUGCUCCCUGGGGGGUCUGAUCCUGUGCUUCCUGGGAGGUGUGAUAUCAUGGUUCCUGGGAGGUGUGAUCCCGUGCUUCCUGGGAGGUGUGAUAUUGUGGUUCCUGGGAGGUGUGAUCCCGUGCUCCCUGGGAGGUGUGAUC	#N/A	#N/A	#N/A	#N/A	#N/A
hsa-mir-3689d-1	MI0016834	Chr9	134849609	134849682	-	UGGGAGGUGUGAUCUCACACUCGCUGGGAGGUGUGCUAUCGUCUUCCCCGGGAGGUGUGAUCCUGUUCUUCCUG	#N/A	#N/A	#N/A	#N/A	#N/A
hsa-mir-3689a	MI0016090	Chr9	134849487	134849564	-	CCUGGGAGGUGUGAUAUCAUGGUUCCUGGGAGGUGUGAUCCUGUGCUUCCUGGGAGGUGUGAUAUCGUGGUUCCUGGG	#N/A	#N/A	#N/A	#N/A	#N/A
hsa-mir-3689c	MI0016832	Chr9	134849298	134849369	-	GGGAGGUGUGAUAUCGUGGUUCCUGGGAGGUGUGAUAUCGUGGUUCCUGGGAGGUGUGAUAUUGUGGUUCCU	#N/A	#N/A	#N/A	#N/A	#N/A
hsa-mir-17	MI0000071	Chr13	91350605	91350688	+	GUCAGAAUAAUGUCAAAGUGCUUACAGUGCAGGUAGUGAUAUGUGCAUCUACUGCAGUGAAGGCACUUGUAGCAUUAUGGUGAC	1.80877	10.1866	11.8524	0.000575869	0.00980382
hsa-mir-18a	MI0000072	Chr13	91350751	91350821	+	UGUUCUAAGGUGCAUCUAGUGCAGAUAGUGAAGUAGAUUAGCAUCUACUGCCCUAAGUGCUCCUUCUGGCA	3.92645	4.86362	22.5567	2.04033e-06	0.000101815
hsa-mir-19a	MI0000073	Chr13	91350891	91350972	+	GCAGUCCUCUGUUAGUUUUGCAUAGUUGCACUACAAGAAGAAUGUAGUUGUGCAAAUCUAUGCAAAACUGAUGGUGGCCUGC	#N/A	#N/A	#N/A	#N/A	#N/A
hsa-mir-20a	MI0000076	Chr13	91351065	91351135	+	GUAGCACUAAAGUGCUUAUAGUGCAGGUAGUGUUUAGUUAUCUACUGCAUUAUGAGCACUUAAAGUACUGC	2.16403	9.06637	10.4423	0.00123163	0.0159772
hsa-mir-19b-1	MI0000074	Chr13	91351192	91351278	+	CACUGUUCUAUGGUUAGUUUUGCAGGUUUGCAUCCAGCUGUGUGAUAUUCUGCUGUGCAAAUCCAUGCAAAACUGACUGUGGUAGUG	#N/A	#N/A	#N/A	#N/A	#N/A
hsa-mir-92a-1	MI0000093	Chr13	91351314	91351391	+	CUUUCUACACAGGUUGGGAUCGGUUGCAAUGCUGUGUUUCUGUAUGGUAUUGCACUUGUCCCGGCCUGUUGAGUUUGG	1.89168	13.0428	13.6111	0.00022485	0.00482909
hsa-mir-106a	MI0000113	ChrX	134170198	134170278	-	CCUUGGCCAUGUAAAAGUGCUUACAGUGCAGGUAGCUUUUUGAGAUCUACUGCAAUGUAAGCACUUCUUACAUUACCAUGG	4.44071	5.54457	15.2257	9.53951e-05	0.00233634
hsa-mir-18b	MI0001518	ChrX	134170041	134170111	-	UGUGUUAAGGUGCAUCUAGUGCAGUUAGUGAAGCAGCUUAGAAUCUACUGCCCUAAAUGCCCCUUCUGGCA	3.73759	1.25014	10.8228	0.00100259	0.0142818
hsa-mir-20b	MI0001519	ChrX	134169809	134169877	-	AGUACCAAAGUGCUCAUAGUGCAGGUAGUUUUGGCAUGACUCUACUGUAGUAUGGGCACUUCCAGUACU	5.29412	6.94206	12.776	0.000351091	0.00671402
hsa-mir-19b-2	MI0000075	ChrX	134169671	134169766	-	ACAUUGCUACUUACAAUUAGUUUUGCAGGUUUGCAUUUCAGCGUAUAUAUGUAUAUGUGGCUGUGCAAAUCCAUGCAAAACUGAUUGUGAUAAUGU	#N/A	#N/A	#N/A	#N/A	#N/A
hsa-mir-92a-2	MI0000094	ChrX	134169538	134169612	-	UCAUCCCUGGGUGGGGAUUUGUUGCAUUACUUGUGUUCUAUAUAAAGUAUUGCACUUGUCCCGGCCUGUGGAAGA	1.8864	12.9117	13.502	0.000238308	0.00504057
hsa-mir-363	MI0000764	ChrX	134169378	134169452	-	UGUUGUCGGGUGGAUCACGAUGCAAUUUUGAUGAGUAUCAUAGGAGAAAAAUUGCACGGUAUCCAUCUGUAAACC	4.81521	5.92827	13.9238	0.000190368	0.00421831
hsa-mir-424	MI0001446	ChrX	134546614	134546711	-	CGAGGGGAUACAGCAGCAAUUCAUGUUUUGAAGUGUUCUAAAUGGUUCAAAACGUGAGGCGCUGCUAUACCCCCUCGUGGGGAAGGUAGAAGGUGGGG	#N/A	#N/A	#N/A	#N/A	#N/A
hsa-mir-503	MI0003188	ChrX	134546328	134546398	-	UGCCCUAGCAGCGGGAACAGUUCUGCAGUGAGCGAUCGGUGCUCUGGGGUAUUGUUUCCGCUGCCAGGGUA	#N/A	#N/A	#N/A	#N/A	#N/A
hsa-mir-542	MI0003686	ChrX	134541341	134541437	-	CAGAUCUCAGACAUCUCGGGGAUCAUCAUGUCACGAGAUACCAGUGUGCACUUGUGACAGAUUGAUAACUGAAAGGUCUGGGAGCCACUCAUCUUCA	#N/A	#N/A	#N/A	#N/A	#N/A
hsa-mir-450a-2	MI0003187	ChrX	134540508	134540607	-	CCAAAGAAAGAUGCUAAACUAUUUUUGCGAUGUGUUCCUAAUAUGUAAUAUAAAUGUAUUGGGGACAUUUUGCAUUCAUAGUUUUGUAUCAAUAAUAUGG	#N/A	#N/A	#N/A	#N/A	#N/A
hsa-mir-450a-1	MI0001652	ChrX	134540341	134540431	-	AAACGAUACUAAACUGUUUUUGCGAUGUGUUCCUAAUAUGCACUAUAAAUAUAUUGGGAACAUUUUGCAUGUAUAGUUUUGUAUCAAUAUA	#N/A	#N/A	#N/A	#N/A	#N/A
hsa-mir-450b	MI0005531	ChrX	134540185	134540262	-	GCAGAAUUAUUUUUGCAAUAUGUUCCUGAAUAUGUAAUAUAAGUGUAUUGGGAUCAUUUUGCAUCCAUAGUUUUGUAU	#N/A	#N/A	#N/A	#N/A	#N/A
hsa-mir-891b	MI0005534	ChrX	146001053	146001131	-	CCUUAAUCCUUGCAACUUACCUGAGUCAUUGAUUCAGUAAAACAUUCAAUGGCACAUGUUUGUUGUUAGGGUCAAAAGA	#N/A	#N/A	#N/A	#N/A	#N/A
hsa-mir-892b	MI0005538	ChrX	145997198	145997274	-	UGCAAUGCCCUACUCAGAAAGGUGCCAUUUAUGUAGAUUUUAUGUCACUGGCUCCUUUCUGGGUAGAGCAAGGCUCA	#N/A	#N/A	#N/A	#N/A	#N/A
hsa-mir-892a	MI0005528	ChrX	145996669	145996743	-	GCAGUGCCUUACUCAGAAAGGUGCCAGUCACUUACACUACAUGUCACUGUGUCCUUUCUGCGUAGAGUAAGGCUC	#N/A	#N/A	#N/A	#N/A	#N/A
hsa-mir-888	MI0005537	ChrX	145994784	145994860	-	GGCAGUGCUCUACUCAAAAAGCUGUCAGUCACUUAGAUUACAUGUGACUGACACCUCUUUGGGUGAAGGAAGGCUCA	#N/A	#N/A	#N/A	#N/A	#N/A
hsa-mir-890	MI0005533	ChrX	145994275	145994351	-	GGAAGUGCCCUACUUGGAAAGGCAUCAGUUGCUUAGAUUACAUGUAACUAUUCCCUUUCUGAGUAGAGUAAGUCUUA	#N/A	#N/A	#N/A	#N/A	#N/A
hsa-mir-892c	MI0022560	ChrX	145992750	145992826	-	GGCAGUGCCCUAUUCAGAAAGGUGCCAGUCACUUAGAUUACAUGUCACUGUUUCCUUUCUGAGUGGAGUAGGGCUUA	#N/A	#N/A	#N/A	#N/A	#N/A
hsa-mir-941-1	MI0005763	Chr20	63919449	63919520	+	UGUGGACAUGUGCCCAGGGCCCGGGACAGCGCCACGGAAGAGGACGCACCCGGCUGUGUGCACAUGUGCCCA	#N/A	#N/A	#N/A	#N/A	#N/A
hsa-mir-941-2	MI0005764	Chr20	63919505	63919576	+	UGUGCACAUGUGCCCAGGGCCCGGGACAGCGCCACGGAAGAGGACGCACCCGGCUGUGUGCACAUGUGCCCA	#N/A	#N/A	#N/A	#N/A	#N/A
hsa-mir-941-3	MI0005765	Chr20	63919561	63919632	+	UGUGCACAUGUGCCCAGGGCCCGGGACAGCGCCACGGAAGAGGACGCACCCGGCUGUGUGCACAUGUGCCCA	#N/A	#N/A	#N/A	#N/A	#N/A
hsa-mir-941-4	MI0005766	Chr20	63919756	63919827	+	UGUGCACAUGUGCCCAGGGCCCGGGACAGCGCCACGGAAGAGGACGCACCCGGCUGUGUGCACAUGUGCCCA	#N/A	#N/A	#N/A	#N/A	#N/A
hsa-mir-941-5	MI0031520	Chr20	63919868	63919939	+	UGUGCACAUGUGCCCAGGGCCCGGGACAGCGCCACGGAAGAGGACGCACCCGGCUGUGUGCACAUGUGCCCA	#N/A	#N/A	#N/A	#N/A	#N/A
hsa-mir-302b	MI0000772	Chr4	112648485	112648557	-	GCUCCCUUCAACUUUAACAUGGAAGUGCUUUCUGUGACUUUAAAAGUAAGUGCUUCCAUGUUUUAGUAGGAGU	#N/A	#N/A	#N/A	#N/A	#N/A
hsa-mir-302c	MI0000773	Chr4	112648363	112648430	-	CCUUUGCUUUAACAUGGGGGUACCUGCUGUGUGAAACAAAAGUAAGUGCUUCCAUGUUUCAGUGGAGG	#N/A	#N/A	#N/A	#N/A	#N/A
hsa-mir-302a	MI0000738	Chr4	112648183	112648251	-	CCACCACUUAAACGUGGAUGUACUUGCUUUGAAACUAAAGAAGUAAGUGCUUCCAUGUUUUGGUGAUGG	#N/A	#N/A	#N/A	#N/A	#N/A
hsa-mir-302d	MI0000774	Chr4	112648004	112648071	-	CCUCUACUUUAACAUGGAGGCACUUGCUGUGACAUGACAAAAAUAAGUGCUUCCAUGUUUGAGUGUGG	#N/A	#N/A	#N/A	#N/A	#N/A
hsa-mir-367	MI0000775	Chr4	112647874	112647941	-	CCAUUACUGUUGCUAAUAUGCAACUCUGUUGAAUAUAAAUUGGAAUUGCACUUUAGCAAUGGUGAUGG	#N/A	#N/A	#N/A	#N/A	#N/A
hsa-mir-6749	MI0022594	Chr11	64902387	64902455	-	GGCCCUCGGGCCUGGGGUUGGGGGAGCUCUGUCCUGUCUCACUCAUUGCUCCUCCCCUGCCUGGCCCAG	#N/A	#N/A	#N/A	#N/A	#N/A
hsa-mir-6750	MI0022595	Chr11	64898363	64898437	-	GCUGUCAGGGAACAGCUGGGUGAGCUGCUGCCCCAGAGGCCCAGCAGGUGUCCAGAACUCACCCUCUGCUCCCAG	#N/A	#N/A	#N/A	#N/A	#N/A
hsa-mir-194-2	MI0000732	Chr11	64891355	64891439	-	UGGUUCCCGCCCCCUGUAACAGCAACUCCAUGUGGAAGUGCCCACUGGUUCCAGUGGGGCUGCUGUUAUCUGGGGCGAGGGCCAG	#N/A	#N/A	#N/A	#N/A	#N/A
hsa-mir-192	MI0000234	Chr11	64891137	64891246	-	GCCGAGACCGAGUGCACAGGGCUCUGACCUAUGAAUUGACAGCCAGUGCUCUCGUCUCCCCUCUGGCUGCCAAUUCCAUAGGUCACAGGUAUGUUCGCCUCAAUGCCAGC	#N/A	#N/A	#N/A	#N/A	#N/A
hsa-mir-4537	MI0016908	Chr14	105859484	105859553	-	UGAGCCGAGCUGAGCUUAGCUGGGCUGAGCUAACCAGGGCUGGGCUGAGCUGGGCUGAGCUGAGCUGAGC	#N/A	#N/A	#N/A	#N/A	#N/A
hsa-mir-4538	MI0016909	Chr14	105858165	105858242	-	GAGCUUGGAUGAGCUGGGCUGAACUGGGCUGGGUUGAGCUGGGCUGGGCUGAGUUGAGCCAGACUGAUCUGGGCUGAG	#N/A	#N/A	#N/A	#N/A	#N/A
hsa-mir-4507	MI0016871	Chr14	105858124	105858175	-	UCUGGGCUGAGCCGAGCUGGGUUAAGCCGAGCUGGGUUGGGCUGGGCUGGGU	#N/A	#N/A	#N/A	#N/A	#N/A
hsa-mir-4539	MI0016910	Chr14	105857513	105857572	-	UGAGCUGAGCUCUGCUGUGCUGUGCUGAGCAGGGCUGAGCUGAACUGGGCUGAGCUGGGC	#N/A	#N/A	#N/A	#N/A	#N/A
hsa-mir-4732	MI0017369	Chr17	28861655	28861730	-	GAGGGAGCUGUAGAGCAGGGAGCAGGAAGCUGUGUGUGUCCAGCCCUGACCUGUCCUGUUCUGCCCCCAGCCCCUC	#N/A	#N/A	#N/A	#N/A	#N/A
hsa-mir-144	MI0000460	Chr17	28861533	28861618	-	UGGGGCCCUGGCUGGGAUAUCAUCAUAUACUGUAAGUUUGCGAUGAGACACUACAGUAUAGAUGAUGUACUAGUCCGGGCACCCCC	#N/A	#N/A	#N/A	#N/A	#N/A
hsa-mir-451b	MI0017360	Chr17	28861371	28861438	+	UGGGUAUAGCAAGAGAACCAUUACCAUUACUAAACUCAGUAAUGGUAACGGUUUCCUUGCCAUUCCCA	#N/A	#N/A	#N/A	#N/A	#N/A
hsa-mir-451a	MI0001729	Chr17	28861369	28861440	-	CUUGGGAAUGGCAAGGAAACCGUUACCAUUACUGAGUUUAGUAAUGGUAAUGGUUCUCUUGCUAUACCCAGA	#N/A	#N/A	#N/A	#N/A	#N/A
hsa-mir-1250	MI0006385	Chr17	81133196	81133308	-	CUGUCCCGCUGGCCUGGCAGGUGACGGUGCUGGAUGUGGCCUUUUUGCCUUUUCUAAAGGCCACAUUUUCCAGCCCAUUCAACCUUCCAGAGCCCUCUGAAGUGGCCACAGGC	#N/A	#N/A	#N/A	#N/A	#N/A
hsa-mir-338	MI0000814	Chr17	81125883	81125949	-	UCUCCAACAAUAUCCUGGUGCUGAGUGAUGACUCAGGCGACUCCAGCAUCAGUGAUUUUGUUGAAGA	#N/A	#N/A	#N/A	#N/A	#N/A
hsa-mir-3065	MI0014228	Chr17	81125877	81125955	+	CUGCCCUCUUCAACAAAAUCACUGAUGCUGGAGUCGCCUGAGUCAUCACUCAGCACCAGGAUAUUGUUGGAGAGGACAG	#N/A	#N/A	#N/A	#N/A	#N/A
hsa-mir-657	MI0003681	Chr17	81125276	81125373	-	GUGUAGUAGAGCUAGGAGGAGAGGGUCCUGGAGAAGCGUGGACCGGUCCGGGUGGGUUCCGGCAGGUUCUCACCCUCUCUAGGCCCCAUUCUCCUCUG	#N/A	#N/A	#N/A	#N/A	#N/A
hsa-mir-371a	MI0000779	Chr19	53787675	53787741	+	GUGGCACUCAAACUGUGGGGGCACUUUCUGCUCUCUGGUGAAAGUGCCGCCAUCUUUUGAGUGUUAC	#N/A	#N/A	#N/A	#N/A	#N/A
hsa-mir-371b	MI0017393	Chr19	53787677	53787742	-	GGUAACACUCAAAAGAUGGCGGCACUUUCACCAGAGAGCAGAAAGUGCCCCCACAGUUUGAGUGCC	#N/A	#N/A	#N/A	#N/A	#N/A
hsa-mir-372	MI0000780	Chr19	53787890	53787956	+	GUGGGCCUCAAAUGUGGAGCACUAUUCUGAUGUCCAAGUGGAAAGUGCUGCGACAUUUGAGCGUCAC	#N/A	#N/A	#N/A	#N/A	#N/A
hsa-mir-373	MI0000781	Chr19	53788705	53788773	+	GGGAUACUCAAAAUGGGGGCGCUUUCCUUUUUGUCUGUACUGGGAAGUGCUUCGAUUUUGGGGUGUCCC	#N/A	#N/A	#N/A	#N/A	#N/A
hsa-mir-23b	MI0000439	Chr9	95085208	95085304	+	CUCAGGUGCUCUGGCUGCUUGGGUUCCUGGCAUGCUGAUUUGUGACUUAAGAUUAAAAUCACAUUGCCAGGGAUUACCACGCAACCACGACCUUGGC	#N/A	#N/A	#N/A	#N/A	#N/A
hsa-mir-27b	MI0000440	Chr9	95085445	95085541	+	ACCUCUCUAACAAGGUGCAGAGCUUAGCUGAUUGGUGAACAGUGAUUGGUUUCCGCUUUGUUCACAGUGGCUAAGUUCUGCACCUGAAGAGAAGGUG	#N/A	#N/A	#N/A	#N/A	#N/A
hsa-mir-3074	MI0014181	Chr9	95086014	95086094	-	GCUCGACUCCUGUUCCUGCUGAACUGAGCCAGUGUGUAAAAUGAGAACUGAUAUCAGCUCAGUAGGCACCGGAGGGCGGGU	#N/A	#N/A	#N/A	#N/A	#N/A
hsa-mir-24-1	MI0000080	Chr9	95086021	95086088	+	CUCCGGUGCCUACUGAGCUGAUAUCAGUUCUCAUUUUACACACUGGCUCAGUUCAGCAGGAACAGGAG	1.66697	10.4965	10.4226	0.00124481	0.0159772
hsa-mir-508	MI0003195	ChrX	147236913	147237027	-	CCACCUUCAGCUGAGUGUAGUGCCCUACUCCAGAGGGCGUCACUCAUGUAAACUAAAACAUGAUUGUAGCCUUUUGGAGUAGAGUAAUACACAUCACGUAACGCAUAUUUGGUGG	#N/A	#N/A	#N/A	#N/A	#N/A
hsa-mir-507	MI0003194	ChrX	147230984	147231077	-	GUGCUGUGUGUAGUGCUUCACUUCAAGAAGUGCCAUGCAUGUGUCUAGAAAUAUGUUUUGCACCUUUUGGAGUGAAAUAAUGCACAACAGAUAC	#N/A	#N/A	#N/A	#N/A	#N/A
hsa-mir-506	MI0003193	ChrX	147230720	147230843	-	GCCACCACCAUCAGCCAUACUAUGUGUAGUGCCUUAUUCAGGAAGGUGUUACUUAAUAGAUUAAUAUUUGUAAGGCACCCUUCUGAGUAGAGUAAUGUGCAACAUGGACAACAUUUGUGGUGGC	#N/A	#N/A	#N/A	#N/A	#N/A
hsa-mir-513a-2	MI0003192	ChrX	147225826	147225952	-	GGAUGCCACAUUCAGCCAUUCAGUGUGCAGUGCCUUUCACAGGGAGGUGUCAUUUAUGUGAACUAAAAUAUAAAUUUCACCUUUCUGAGAAGGGUAAUGUACAGCAUGCACUGCAUAUGUGGUGUCC	#N/A	#N/A	#N/A	#N/A	#N/A
hsa-mir-509-1	MI0003196	ChrX	147260532	147260625	-	CAUGCUGUGUGUGGUACCCUACUGCAGACAGUGGCAAUCAUGUAUAAUUAAAAAUGAUUGGUACGUCUGUGGGUAGAGUACUGCAUGACACAUG	#N/A	#N/A	#N/A	#N/A	#N/A
hsa-mir-509-3	MI0005717	ChrX	147259652	147259726	-	GUGGUACCCUACUGCAGACGUGGCAAUCAUGUAUAAUUAAAAAUGAUUGGUACGUCUGUGGGUAGAGUACUGCAU	#N/A	#N/A	#N/A	#N/A	#N/A
hsa-mir-509-2	MI0005530	ChrX	147258760	147258850	-	CAUGCUGUGUGUGGUACCCUACUGCAGACAGUGGCAAUCAUGUAUAAUUAAAAAUGAUUGGUACGUCUGUGGGUAGAGUACUGCAUGACAC	#N/A	#N/A	#N/A	#N/A	#N/A
hsa-mir-514b	MI0014251	ChrX	147250151	147250230	-	CAUGUGGUACUCUUCUCAAGAGGGAGGCAAUCAUGUGUAAUUAGAUAUGAUUGACACCUCUGUGAGUGGAGUAACACAUG	#N/A	#N/A	#N/A	#N/A	#N/A
hsa-mir-514a-3	MI0003200	ChrX	147284641	147284728	-	GUUGUCUGUGGUACCCUACUCUGGAGAGUGACAAUCAUGUAUAACUAAAUUUGAUUGACACUUCUGUGAGUAGAGUAACGCAUGACAC	#N/A	#N/A	#N/A	#N/A	#N/A
hsa-mir-514a-2	MI0003199	ChrX	147281943	147282030	-	GUUGUCUGUGGUACCCUACUCUGGAGAGUGACAAUCAUGUAUAACUAAAUUUGAUUGACACUUCUGUGAGUAGAGUAACGCAUGACAC	#N/A	#N/A	#N/A	#N/A	#N/A
hsa-mir-514a-1	MI0003198	ChrX	147279247	147279344	-	AACAUGUUGUCUGUGGUACCCUACUCUGGAGAGUGACAAUCAUGUAUAAUUAAAUUUGAUUGACACUUCUGUGAGUAGAGUAACGCAUGACACGUACG	#N/A	#N/A	#N/A	#N/A	#N/A
hsa-mir-510	MI0003197	ChrX	147272335	147272408	-	GUGGUGUCCUACUCAGGAGAGUGGCAAUCACAUGUAAUUAGGUGUGAUUGAAACCUCUAAGAGUGGAGUAACAC	#N/A	#N/A	#N/A	#N/A	#N/A
hsa-mir-200b	MI0000342	Chr1	1167104	1167198	+	CCAGCUCGGGCAGCCGUGGCCAUCUUACUGGGCAGCAUUGGAUGGAGUCAGGUCUCUAAUACUGCCUGGUAAUGAUGACGGCGGAGCCCUGCACG	3.58734	10.336	17.0003	3.73738e-05	0.00111008
hsa-mir-200a	MI0000737	Chr1	1167863	1167952	+	CCGGGCCCCUGUGAGCAUCUUACCGGACAGUGCUGGAUUUCCCAGCUUGACUCUAACACUGUCUGGUAACGAUGUUCAAAGGUGACCCGC	4.54538	10.6868	25.5718	4.26233e-07	2.83343e-05
hsa-mir-429	MI0001641	Chr1	1169005	1169087	+	CGCCGGCCGAUGGGCGUCUUACCAGACAUGGUUAGACCUGGCCCUCUGUCUAAUACUGUCUGGUAAAACCGUCCAUCCGCUGC	4.77729	7.72525	22.1854	2.47549e-06	0.000115193
hsa-mir-199a-2	MI0000281	Chr1	172144535	172144644	-	AGGAAGCUUCUGGAGAUCCUGCUCCGUCGCCCCAGUGUUCAGACUACCUGUUCAGGACAAUGCCGUUGUACAGUAGUCUGCACAUUGGUUAGACUGGGCAAGGGAGAGCA	#N/A	#N/A	#N/A	#N/A	#N/A
hsa-mir-3120	MI0014136	Chr1	172138808	172138888	+	GUCAUGUGACUGCCUGUCUGUGCCUGCUGUACAGGUGAGCGGAUGUUCUGCACAGCAAGUGUAGACAGGCAGACACAUGAC	#N/A	#N/A	#N/A	#N/A	#N/A
hsa-mir-214	MI0000290	Chr1	172138798	172138907	-	GGCCUGGCUGGACAGAGUUGUCAUGUGUCUGCCUGUCUACACUUGCUGUGCAGAACAUCCGCUCACCUGUACAGCAGGCACAGACAGGCAGUCACAUGACAACCCAGCCU	#N/A	#N/A	#N/A	#N/A	#N/A
hsa-mir-100	MI0000102	Chr11	122152229	122152308	-	CCUGUUGCCACAAACCCGUAGAUCCGAACUUGUGGUAUUAGUCCGCACAAGCUUGUAUCUAUAGGUAUGUGUCUGUUAGG	-2.41585	11.439	19.5503	9.79847e-06	0.000390819
hsa-mir-10526	MI0033673	Chr11	122152103	122152156	-	UCCCCUUAGUUUCCUUUAAGAGUGAUAAAAAUGGAAAAGGGGGCUGAGGUGGAG	#N/A	#N/A	#N/A	#N/A	#N/A
hsa-let-7a-2	MI0000061	Chr11	122146522	122146593	-	AGGUUGAGGUAGUAGGUUGUAUAGUUUAGAAUUACAUCAAGGGAGAUAACUGUACAGCCUCCUAGCUUUCCU	#N/A	#N/A	#N/A	#N/A	#N/A
hsa-mir-1179	MI0006272	Chr15	88608107	88608197	+	GGCUGGAAAGGAAGAAGCAUUCUUUCAUUGGUUGGUGUGUAUUGCCUUGUCAACCAAUAAGAGGAUGCCAUUUAUCCUUUUCUGACUAGCU	#N/A	#N/A	#N/A	#N/A	#N/A
hsa-mir-7-2	MI0000264	Chr15	88611825	88611934	+	CUGGAUACAGAGUGGACCGGCUGGCCCCAUCUGGAAGACUAGUGAUUUUGUUGUUGUCUUACUGCGCUCAACAACAAAUCCCAGUCUACCUAAUGGUGCCAGCCAUCGCA	#N/A	#N/A	#N/A	#N/A	#N/A
hsa-mir-3529	MI0017351	Chr15	88611847	88611924	-	GGCACCAUUAGGUAGACUGGGAUUUGUUGUUGAGCGCAGUAAGACAACAACAAAAUCACUAGUCUUCCAGAUGGGGCC	#N/A	#N/A	#N/A	#N/A	#N/A
hsa-mir-3677	MI0016078	Chr16	2270713	2270772	+	GGCAGUGGCCAGAGCCCUGCAGUGCUGGGCAUGGGCUUCUCGUGGGCUCUGGCCACGGCC	#N/A	#N/A	#N/A	#N/A	#N/A
hsa-mir-940	MI0005762	Chr16	2271747	2271840	+	GUGAGGUGUGGGCCCGGCCCCAGGAGCGGGGCCUGGGCAGCCCCGUGUGUUGAGGAAGGAAGGCAGGGCCCCCGCUCCCCGGGCCUGACCCCAC	4.37982	2.27618	16.6587	4.47439e-05	0.0013013
hsa-mir-4717	MI0017352	Chr16	2274620	2274691	+	GGCAGUGUUUAGGCCACAGCCACCCAUGUGUAGGGGUGGCUACACAUGGGUGGCUGUGGCCUAAACACUGCC	#N/A	#N/A	#N/A	#N/A	#N/A
hsa-mir-3179-1	MI0014213	Chr16	14901508	14901591	+	CAGGAUCACAGACGUUUAAAUUACACUCCUUCUGCUGUGCCUUACAGCAGUAGAAGGGGUGAAAUUUAAACGUCUGUGAUCCUG	#N/A	#N/A	#N/A	#N/A	#N/A
hsa-mir-3670-1	MI0016071	Chr16	14907717	14907781	+	UCUAGACUGGUAUAGCUGCUUUUGGAGCCUCACCUGCUGAGAGCUCACAGCUGUCCUUCUCUAGA	#N/A	#N/A	#N/A	#N/A	#N/A
hsa-mir-3180-1	MI0014214	Chr16	14911220	14911313	+	CAGUGCGACGGGCGGAGCUUCCAGACGCUCCGCCCCACGUCGCAUGCGCCCCGGGAAAGCGUGGGGCGGAGCUUCCGGAGGCCCCGCCCUGCUG	#N/A	#N/A	#N/A	#N/A	#N/A
hsa-mir-3179-2	MI0014216	Chr16	16300159	16300242	+	CAGGAUCACAGACGUUUAAAUUACACUCCUUCUGCUGUGCCUUACAGCAGUAGAAGGGGUGAAAUUUAAACGUCUGUGAUCCUG	#N/A	#N/A	#N/A	#N/A	#N/A
hsa-mir-3670-2	MI0019112	Chr16	16306370	16306434	+	UCUAGACUGGUAUAGCUGCUUUUGGAGCCUCACCUGCUGAGAGCUCACAGCUGUCCUUCUCUAGA	#N/A	#N/A	#N/A	#N/A	#N/A
hsa-mir-3180-2	MI0014215	Chr16	16309879	16309966	+	GCGACGGGCGGAGCUUCCAGACGCUCCGCCCCACGUCGCAUGCGCCCCGGGAAAGCGUGGGGCGGAGCUUCCGGAGGCCCCGCCCUGC	#N/A	#N/A	#N/A	#N/A	#N/A
hsa-mir-3179-3	MI0014221	Chr16	18411894	18411977	-	CAGGAUCACAGACGUUUAAAUUACACUCCUUCUGCUGUGCCUUACAGCAGUAGAAGGGGUGAAAUUUAAACGUCUGUGAUCCUG	#N/A	#N/A	#N/A	#N/A	#N/A
hsa-mir-3670-3	MI0031513	Chr16	18405698	18405762	-	UCUAGACUGGUAUAGCUGCUUUUGGAGCCUCACCUGCUGAGAGCUCACAGCUGUCCUUCUCUAGA	#N/A	#N/A	#N/A	#N/A	#N/A
hsa-mir-3180-3	MI0014217	Chr16	18402178	18402271	-	CAGUGCGACGGGCGGAGCUUCCAGACGCUCCGCCCCACGUCGCAUGCGCCCCGGGAAAGCGUGGGGCGGAGCUUCCGGAGGCCCCGCCCUGCUG	#N/A	#N/A	#N/A	#N/A	#N/A
hsa-mir-23a	MI0000079	Chr19	13836587	13836659	-	GGCCGGCUGGGGUUCCUGGGGAUGGGAUUUGCUUCCUGUCACAAAUCACAUUGCCAGGGAUUUCCAACCGACC	#N/A	#N/A	#N/A	#N/A	#N/A
hsa-mir-27a	MI0000085	Chr19	13836440	13836517	-	CUGAGGAGCAGGGCUUAGCUGCUUGUGAGCAGGGUCCACACCAAGUCGUGUUCACAGUGGCUAAGUUCCGCCCCCCAG	1.99091	11.4155	11.8536	0.000575486	0.00980382
hsa-mir-24-2	MI0000081	Chr19	13836287	13836359	-	CUCUGCCUCCCGUGCCUACUGAGCUGAAACACAGUUGGUUUGUGUACACUGGCUCAGUUCAGCAGGAACAGGG	1.74911	10.4978	11.3267	0.00076399	0.0118503
hsa-mir-99b	MI0000746	Chr19	51692612	51692681	+	GGCACCCACCCGUAGAACCGACCUUGCGGGGCCUUCGCCGCACACAAGCUCGUGUCUGUGGGUCCGUGUC	#N/A	#N/A	#N/A	#N/A	#N/A
hsa-let-7e	MI0000066	Chr19	51692786	51692864	+	CCCGGGCUGAGGUAGGAGGUUGUAUAGUUGAGGAGGACACCCAAGGAGAUCACUAUACGGCCUCCUAGCUUUCCCCAGG	#N/A	#N/A	#N/A	#N/A	#N/A
hsa-mir-125a	MI0000469	Chr19	51693254	51693339	+	UGCCAGUCUCUAGGUCCCUGAGACCCUUUAACCUGUGAGGACAUCCAGGGUCACAGGUGAGGUUCUUGGGAGCCUGGCGUCUGGCC	-1.28002	9.22155	10.152	0.00144142	0.0179663
hsa-mir-6803	MI0022648	Chr19	55245186	55245250	-	CUCCUCUGGGGGUGGGGGGCUGGGCGUGGUGGACAGCGAUGCAUCCCUCGCCUUCUCACCCUCAG	#N/A	#N/A	#N/A	#N/A	#N/A
hsa-mir-6802	MI0022647	Chr19	55239912	55239976	-	GAGGGCUAGGUGGGGGGCUUGAAGCCCCGAGAUGCCUCACGUCUUCACCCCUCUCACCUAAGCAG	#N/A	#N/A	#N/A	#N/A	#N/A
hsa-mir-6804	MI0022649	Chr19	55230885	55230952	-	GGAUGUGAGGGUGUCAGCAGGUGACGGUGGGGGCCACGCUGACAGCCGCACCUGCCUCUCACCCACAG	#N/A	#N/A	#N/A	#N/A	#N/A
hsa-mir-6724-1	MI0022559	Chr21	8205315	8205406	+	CGCUGCGCUUCUGGGCCCGCGGCGGGCGUGGGGCUGCCCGGGCCGGUCGACCAGCGCGCCGUAGCUCCCGAGGCCCGAGCCGCGACCCGCGG	#N/A	#N/A	#N/A	#N/A	#N/A
hsa-mir-10401	MI0033425	Chr21	8206563	8206618	+	CGUGUGGGAAGGCGUGGGGUGCGGACCCCGGCCCGACCUCGCCGUCCCGCCCGCCG	#N/A	#N/A	#N/A	#N/A	#N/A
hsa-mir-10401	MI0033425	Chr21	8250772	8250827	+	CGUGUGGGAAGGCGUGGGGUGCGGACCCCGGCCCGACCUCGCCGUCCCGCCCGCCG	#N/A	#N/A	#N/A	#N/A	#N/A
hsa-mir-10401	MI0033425	Chr21	8389610	8389665	+	CGUGUGGGAAGGCGUGGGGUGCGGACCCCGGCCCGACCUCGCCGUCCCGCCCGCCG	#N/A	#N/A	#N/A	#N/A	#N/A
hsa-mir-10401	MI0033425	Chr21	8433797	8433852	+	CGUGUGGGAAGGCGUGGGGUGCGGACCCCGGCCCGACCUCGCCGUCCCGCCCGCCG	#N/A	#N/A	#N/A	#N/A	#N/A
hsa-mir-3648-1	MI0016048	Chr21	8208473	8208652	+	CGCGACUGCGGCGGCGGUGGUGGGGGGAGCCGCGGGGAUCGCCGAGGGCCGGUCGGCCGCCCCGGGUGCCGCGCGGUGCCGCCGGCGGCGGUGAGGCCCCGCGCGUGUGUCCCGGCUGCGGUCGGCCGCGCUCGAGGGGUCCCCGUGGCGUCCCCUUCCCCGCCGGCCGCCUUUCUCGCG	#N/A	#N/A	#N/A	#N/A	#N/A
hsa-mir-6724-4	MI0031518	Chr21	8432530	8432621	+	CGCUGCGCUUCUGGGCCCGCGGCGGGCGUGGGGCUGCCCGGGCCGGUCGACCAGCGCGCCGUAGCUCCCGAGGCCCGAGCCGCGACCCGCGG	#N/A	#N/A	#N/A	#N/A	#N/A
hsa-mir-10401	MI0033425	Chr21	8206563	8206618	+	CGUGUGGGAAGGCGUGGGGUGCGGACCCCGGCCCGACCUCGCCGUCCCGCCCGCCG	#N/A	#N/A	#N/A	#N/A	#N/A
hsa-mir-10401	MI0033425	Chr21	8250772	8250827	+	CGUGUGGGAAGGCGUGGGGUGCGGACCCCGGCCCGACCUCGCCGUCCCGCCCGCCG	#N/A	#N/A	#N/A	#N/A	#N/A
hsa-mir-10401	MI0033425	Chr21	8389610	8389665	+	CGUGUGGGAAGGCGUGGGGUGCGGACCCCGGCCCGACCUCGCCGUCCCGCCCGCCG	#N/A	#N/A	#N/A	#N/A	#N/A
hsa-mir-10401	MI0033425	Chr21	8433797	8433852	+	CGUGUGGGAAGGCGUGGGGUGCGGACCCCGGCCCGACCUCGCCGUCCCGCCCGCCG	#N/A	#N/A	#N/A	#N/A	#N/A
hsa-mir-10396b	MI0033426	Chr21	8436324	8436374	+	CGGCGGGGCUCGGAGCCGGGCUUCGGCCGGGCCCCGGGCCCUCGACCGGAC	#N/A	#N/A	#N/A	#N/A	#N/A
hsa-let-7a-3	MI0000062	Chr22	46112749	46112822	+	GGGUGAGGUAGUAGGUUGUAUAGUUUGGGGCUCUGCCCUGCUAUGGGAUAACUAUACAAUCUACUGUCUUUCCU	#N/A	#N/A	#N/A	#N/A	#N/A
hsa-mir-4763	MI0017404	Chr22	46113566	46113657	+	CCUGUCCCUCCUGCCCUGCGCCUGCCCAGCCCUCCUGCUCUGGUGACUGAGGACCGCCAGGCAGGGGCUGGUGCUGGGCGGGGGGCGGCGGG	#N/A	#N/A	#N/A	#N/A	#N/A
hsa-let-7b	MI0000063	Chr22	46113686	46113768	+	CGGGGUGAGGUAGUAGGUUGUGUGGUUUCAGGGCAGUGAUGUUGCCCCUCGGAAGAUAACUAUACAACCUACUGCCUUCCCUG	#N/A	#N/A	#N/A	#N/A	#N/A
hsa-mir-449c	MI0003823	Chr5	55172262	55172353	-	GCUGGGAUGUGUCAGGUAGGCAGUGUAUUGCUAGCGGCUGUUAAUGAUUUUAACAGUUGCUAGUUGCACUCCUCUCUGUUGCAUUCAGAAGC	#N/A	#N/A	#N/A	#N/A	#N/A
hsa-mir-449b	MI0003673	Chr5	55170646	55170742	-	UGACCUGAAUCAGGUAGGCAGUGUAUUGUUAGCUGGCUGCUUGGGUCAAGUCAGCAGCCACAACUACCCUGCCACUUGCUUCUGGAUAAAUUCUUCU	#N/A	#N/A	#N/A	#N/A	#N/A
hsa-mir-449a	MI0001648	Chr5	55170532	55170622	-	CUGUGUGUGAUGAGCUGGCAGUGUAUUGUUAGCUGGUUGAAUAUGUGAAUGGCAUCGGCUAACAUGCAACUGCUGUCUUAUUGCAUAUACA	#N/A	#N/A	#N/A	#N/A	#N/A
hsa-mir-106b	MI0000734	Chr7	100093993	100094074	-	CCUGCCGGGGCUAAAGUGCUGACAGUGCAGAUAGUGGUCCUCUCCGUGCUACCGCACUGUGGGUACUUGCUGCUCCAGCAGG	2.84745	9.93121	27.4953	1.57475e-07	1.29315e-05
hsa-mir-93	MI0000095	Chr7	100093768	100093847	-	CUGGGGGCUCCAAAGUGCUGUUCGUGCAGGUAGUGUGAUUACCCAACCUACUGCUGAGCUAGCACUUCCCGAGCCCCCGG	2.42024	12.8898	17.7354	2.53852e-05	0.000843755
hsa-mir-25	MI0000082	Chr7	100093560	100093643	-	GGCCAGUGUUGAGAGGCGGAGACUUGGGCAAUUGCUGGACGCUGCCCUGGGCAUUGCACUUGUCUCGGUCUGACAGUGCCGGCC	#N/A	#N/A	#N/A	#N/A	#N/A
hsa-mir-183	MI0000273	Chr7	129774905	129775014	-	CCGCAGAGUGUGACUCCUGUUCUGUGUAUGGCACUGGUAGAAUUCACUGUGAACAGUCUCAGUCAGUGAAUUACCGAAGGGCCAUAAACAGAGCAGAGACAGAUCCACGA	6.25441	13.1007	26.646	2.44355e-07	1.79537e-05
hsa-mir-96	MI0000098	Chr7	129774692	129774769	-	UGGCCGAUUUUGGCACUAGCACAUUUUUGCUUGUGUCUCUCCGCUCUGAGCAAUCAUGUGCAGUGCCAAUAUGGGAAA	6.60099	4.94494	34.1125	5.20169e-09	6.60141e-07
hsa-mir-182	MI0000272	Chr7	129770383	129770492	-	GAGCUGCUUGCCUCCCCCCGUUUUUGGCAAUGGUAGAACUCACACUGGUGAGGUAACAGGAUCCGGUGGUUCUAGACUUGCCAACUAUGGGGCGAGGACUCAGCCGGCAC	5.171	14.3288	24.3124	8.19102e-07	4.76444e-05
hsa-mir-5692a-2	MI0019298	Chr8	12719132	12719190	+	UACAAAUAAUACCACAGUGGGUGUACCUCAUGUGUGUACACCCUGUGAUAUUAUUUGUA	#N/A	#N/A	#N/A	#N/A	#N/A
hsa-mir-3926-1	MI0016434	Chr8	12727232	12727304	-	AAAAUGGAGCUGGCCAAAAAGCAGGCAGAGACUUUAAAAGCGUCUCUGCCUGCUUUUUGGCCAGCUCCGUUUU	#N/A	#N/A	#N/A	#N/A	#N/A
hsa-mir-3926-2	MI0016437	Chr8	12727237	12727299	+	GGAGCUGGCCAAAAAGCAGGCAGAGACGCUUUUAAAGUCUCUGCCUGCUUUUUGGCCAGCUCC	#N/A	#N/A	#N/A	#N/A	#N/A
hsa-mir-6849	MI0022695	Chr8	144400277	144400345	-	CCUGGGAGUGGAUAGGGGAGUGUGUGGAGAGAGCACUGAGCCUGCCCACCAGCCUGUGUCCACCUCCAG	#N/A	#N/A	#N/A	#N/A	#N/A
hsa-mir-1234	MI0006324	Chr8	144400086	144400165	-	GUGAGUGUGGGGUGGCUGGGGCGGGGGGGGCCCGGGGACGGCUUGGGCCUGCCUAGUCGGCCUGACCACCCACCCCACAG	#N/A	#N/A	#N/A	#N/A	#N/A
hsa-mir-939	MI0005761	Chr8	144394149	144394230	-	UGUGGGCAGGGCCCUGGGGAGCUGAGGCUCUGGGGGUGGCCGGGGCUGACCCUGGGCCUCUGCUCCCCAGUGUCUGACCGCG	#N/A	#N/A	#N/A	#N/A	#N/A
hsa-let-7a-1	MI0000060	Chr9	94175957	94176036	+	UGGGAUGAGGUAGUAGGUUGUAUAGUUUUAGGGUCACACCCACCACUGGGAGAUAACUAUACAAUCUACUGUCUUUCCUA	#N/A	#N/A	#N/A	#N/A	#N/A
hsa-let-7f-1	MI0000067	Chr9	94176347	94176433	+	UCAGAGUGAGGUAGUAGAUUGUAUAGUUGUGGGGUAGUGAUUUUACCCUGUUCAGGAGAUAACUAUACAAUCUAUUGCCUUCCCUGA	#N/A	#N/A	#N/A	#N/A	#N/A
hsa-let-7d	MI0000065	Chr9	94178834	94178920	+	CCUAGGAAGAGGUAGUAGGUUGCAUAGUUUUAGGGCAGGGAUUUUGCCCACAAGGAGGUAACUAUACGACCUGCUGCCUUUCUUAGG	#N/A	#N/A	#N/A	#N/A	#N/A
hsa-mir-374c	MI0016684	ChrX	74218549	74218618	+	ACACGGACAAUGAUAAUACAACCUGCUAAGUGCUAGGACACUUAGCAGGUUGUAUUAUAUCCAUCCGAGU	#N/A	#N/A	#N/A	#N/A	#N/A
hsa-mir-374b	MI0005566	ChrX	74218547	74218618	-	ACUCGGAUGGAUAUAAUACAACCUGCUAAGUGUCCUAGCACUUAGCAGGUUGUAUUAUCAUUGUCCGUGUCU	#N/A	#N/A	#N/A	#N/A	#N/A
hsa-mir-421	MI0003685	ChrX	74218377	74218461	-	GCACAUUGUAGGCCUCAUUAAAUGUUUGUUGAAUGAAAAAAUGAAUCAUCAACAGACAUUAAUUGGGCGCCUGCUCUGUGAUCUC	2.65597	2.03996	12.4824	0.000410806	0.00744785
hsa-mir-105-2	MI0000112	ChrX	152394412	152394492	-	UGUGCAUCGUGGUCAAAUGCUCAGACUCCUGUGGUGGCUGCUUAUGCACCACGGAUGUUUGAGCAUGUGCUAUGGUGUCUA	#N/A	#N/A	#N/A	#N/A	#N/A
hsa-mir-767	MI0003763	ChrX	152393421	152393529	-	GCUUUUAUAUUGUAGGUUUUUGCUCAUGCACCAUGGUUGUCUGAGCAUGCAGCAUGCUUGUCUGCUCAUACCCCAUGGUUUCUGAGCAGGAACCUUCAUUGUCUACUGC	#N/A	#N/A	#N/A	#N/A	#N/A
hsa-mir-105-1	MI0000111	ChrX	152392219	152392299	-	UGUGCAUCGUGGUCAAAUGCUCAGACUCCUGUGGUGGCUGCUCAUGCACCACGGAUGUUUGAGCAUGUGCUACGGUGUCUA	#N/A	#N/A	#N/A	#N/A	#N/A
hsa-mir-30e	MI0000749	Chr1	40754355	40754446	+	GGGCAGUCUUUGCUACUGUAAACAUCCUUGACUGGAAGCUGUAAGGUGUUCAGAGGAGCUUUCAGUCGGAUGUUUACAGCGGCAGGCUGCCA	#N/A	#N/A	#N/A	#N/A	#N/A
hsa-mir-30c-1	MI0000736	Chr1	40757284	40757372	+	ACCAUGCUGUAGUGUGUGUAAACAUCCUACACUCUCAGCUGUGAGCUCAAGGUGGCUGGGAGAGGGUUGUUUACUCCUUCUGCCAUGGA	#N/A	#N/A	#N/A	#N/A	#N/A
hsa-mir-4421	MI0016758	Chr1	51059837	51059905	+	CUGGGUCUCCUUUCUGCUGAGAGUUGAACACUUGUUGGGACAACCUGUCUGUGGAAAGGAGCUACCUAC	#N/A	#N/A	#N/A	#N/A	#N/A
hsa-mir-6500	MI0022211	Chr1	51060018	51060103	+	CCUGCCUGCAGAAAGGAGCUAUCCACUCCAGGUGUCCUUUCUUCUGAGAGCUGGACACUUGUUGGGAUGACCUGCCUGCAGGUAGG	#N/A	#N/A	#N/A	#N/A	#N/A
hsa-mir-3116-1	MI0014128	Chr1	62078786	62078859	+	CUUUAUUGAGUCCCUACUAUGUUCCAGGCACUGGGUAUCGUAGGUGCCUGGAACAUAGUAGGGACUCAAUAAAG	#N/A	#N/A	#N/A	#N/A	#N/A
hsa-mir-3116-2	MI0014129	Chr1	62078789	62078856	-	UAUUGAGUCCCUACUAUGUUCCAGGCACCUACGAUACCCAGUGCCUGGAACAUAGUAGGGACUCAAUA	#N/A	#N/A	#N/A	#N/A	#N/A
hsa-mir-101-1	MI0000103	Chr1	65058434	65058508	-	UGCCCUGGCUCAGUUAUCACAGUGCUGAUGCUGUCUAUUCUAAAGGUACAGUACUGUGAUAACUGAAGGAUGGCA	#N/A	#N/A	#N/A	#N/A	#N/A
hsa-mir-3671	MI0016072	Chr1	65057755	65057842	-	AUGUUAUUGCUGCUGCUGUCACAUUUACAUGAAAAUAAAAUGUAAAUUAUUUUAUUUCUAUCAAAUAAGGACUAGUCUGCAGUGAUAU	#N/A	#N/A	#N/A	#N/A	#N/A
hsa-mir-137	MI0000454	Chr1	98046070	98046171	-	GGUCCUCUGACUCUCUUCGGUGACGGGUAUUCUUGGGUGGAUAAUACGGAUUACGUUGUUAUUGCUUAAGAAUACGCGUAGUCGAGGAGAGUACCAGCGGCA	#N/A	#N/A	#N/A	#N/A	#N/A
hsa-mir-2682	MI0012063	Chr1	98045242	98045351	-	ACCUUCCUGAAAGAGGUUGGGGCAGGCAGUGACUGUUCAGACGUCCAAUCUCUUUGGGACGCCUCUUCAGCGCUGUCUUCCCUGCCUCUGCCUUUAGGACGAGUCUCAAA	#N/A	#N/A	#N/A	#N/A	#N/A
hsa-mir-3119-1	MI0014134	Chr1	170151378	170151462	-	AUUAACUCUGGCUUUUAACUUUGAUGGCAAAGGGGUAGCUAAACAAUCUAUGUCUUUGCCAUCAAAGUUAAAAGCCAUAGUUAAU	#N/A	#N/A	#N/A	#N/A	#N/A
hsa-mir-3119-2	MI0014135	Chr1	170151378	170151462	+	AUUAACUAUGGCUUUUAACUUUGAUGGCAAAGACAUAGAUUGUUUAGCUACCCCUUUGCCAUCAAAGUUAAAAGCCAGAGUUAAU	#N/A	#N/A	#N/A	#N/A	#N/A
hsa-mir-1295b	MI0019146	Chr1	171101739	171101798	+	CACCCAGAUCUGCGGCCUAAUCACAGGCCACAUUUCUGAAUAGGCCACGGAUCUGGGCAA	#N/A	#N/A	#N/A	#N/A	#N/A
hsa-mir-1295a	MI0006357	Chr1	171101728	171101806	-	AGGACAUUUUGCCCAGAUCCGUGGCCUAUUCAGAAAUGUGGCCUGUGAUUAGGCCGCAGAUCUGGGUGAAAUGUCCUCC	#N/A	#N/A	#N/A	#N/A	#N/A
hsa-mir-181a-1	MI0000289	Chr1	198859044	198859153	-	UGAGUUUUGAGGUUGCUUCAGUGAACAUUCAACGCUGUCGGUGAGUUUGGAAUUAAAAUCAAAACCAUCGACCGUUGAUUGUACCCUAUGGCUAACCAUCAUCUACUCCA	#N/A	#N/A	#N/A	#N/A	#N/A
hsa-mir-181b-1	MI0000270	Chr1	198858873	198858982	-	CCUGUGCAGAGAUUAUUUUUUAAAAGGUCACAAUCAACAUUCAUUGCUGUCGGUGGGUUGAACUGUGUGGACAAGCUCACUGAACAAUGAAUGCAACUGUGGCCCCGCUU	#N/A	#N/A	#N/A	#N/A	#N/A
hsa-mir-29b-2	MI0000107	Chr1	207802443	207802523	-	CUUCUGGAAGCUGGUUUCACAUGGUGGCUUAGAUUUUUCCAUCUUUGUAUCUAGCACCAUUUGAAAUCAGUGUUUUAGGAG	#N/A	#N/A	#N/A	#N/A	#N/A
hsa-mir-29c	MI0000735	Chr1	207801852	207801939	-	AUCUCUUACACAGGCUGACCGAUUUCUCCUGGUGUUCAGAGUCUGUUUUUGUCUAGCACCAUUUGAAAUCGGUUAUGAUGUAGGGGGA	#N/A	#N/A	#N/A	#N/A	#N/A
hsa-mir-194-1	MI0000488	Chr1	220118157	220118241	-	AUGGUGUUAUCAAGUGUAACAGCAACUCCAUGUGGACUGUGUACCAAUUUCCAGUGGAGAUGCUGUUACUUUUGAUGGUUACCAA	#N/A	#N/A	#N/A	#N/A	#N/A
hsa-mir-215	MI0000291	Chr1	220117853	220117962	-	AUCAUUCAGAAAUGGUAUACAGGAAAAUGACCUAUGAAUUGACAGACAAUAUAGCUGAGUUUGUCUGUCAUUUCUUUAGGCCAAUAUUCUGUAUGACUGUGCUACUUCAA	#N/A	#N/A	#N/A	#N/A	#N/A
hsa-mir-3155a	MI0014183	Chr10	6152196	6152277	+	UCCGGGCAUCACCUCCCACUGCAGAGCCUGGGGAGCCGGACAGCUCCCUUCCCAGGCUCUGCAGUGGGAACUGAUGCCUGGA	#N/A	#N/A	#N/A	#N/A	#N/A
hsa-mir-3155b	MI0016839	Chr10	6152207	6152262	-	CCACUGCAGAGCCUGGGAAGGGAGCUGUCCGGCUCCCCAGGCUCUGCAGUGGGAGG	#N/A	#N/A	#N/A	#N/A	#N/A
hsa-mir-4679-1	MI0017310	Chr10	89063336	89063410	+	GUCUUUUUUCUGUGAUAGAGAUUCUUUGCUUUGUUAGAAACAAAAAGCAAAGAAUCUCUAUCACAGAAAAAAGAU	#N/A	#N/A	#N/A	#N/A	#N/A
hsa-mir-4679-2	MI0017311	Chr10	89063335	89063411	-	UAUCUUUUUUCUGUGAUAGAGAUUCUUUGCUUUUUGUUUCUAACAAAGCAAAGAAUCUCUAUCACAGAAAAAAGACG	#N/A	#N/A	#N/A	#N/A	#N/A
hsa-mir-3158-1	MI0014186	Chr10	101601417	101601497	+	AUUCAGGCCGGUCCUGCAGAGAGGAAGCCCUUCUGCUUACAGGUAUUGGAAGGGCUUCCUCUCUGCAGGACCGGCCUGAAU	#N/A	#N/A	#N/A	#N/A	#N/A
hsa-mir-3158-2	MI0014187	Chr10	101601417	101601497	-	AUUCAGGCCGGUCCUGCAGAGAGGAAGCCCUUCCAAUACCUGUAAGCAGAAGGGCUUCCUCUCUGCAGGACCGGCCUGAAU	#N/A	#N/A	#N/A	#N/A	#N/A
hsa-mir-6715a	MI0022548	Chr10	112299612	112299690	+	UGGGCUGCGUCCACAGGCACAGCCGGUUUGAGCAUUUUUACUGAAUUGCCAAACCAGUCGUGCCUGUGGGCACAACCUU	#N/A	#N/A	#N/A	#N/A	#N/A
hsa-mir-6715b	MI0022549	Chr10	112299612	112299688	-	GGUUGUGCCCACAGGCACGACUGGUUUGGCAAUUCAGUAAAAAUGCUCAAACCGGCUGUGCCUGUGGACGCAGCCCA	#N/A	#N/A	#N/A	#N/A	#N/A
hsa-mir-3160-2	MI0014190	Chr11	46451807	46451887	+	ACCUGCCCUGGGCUUUCUAGUCUCAGCUCUCCUGACCAGCUGAGCUGGAGGAGAGCUGAGACUAGAAAGCCCAGGGCAGGU	#N/A	#N/A	#N/A	#N/A	#N/A
hsa-mir-3160-1	MI0014189	Chr11	46451805	46451889	-	GGACCUGCCCUGGGCUUUCUAGUCUCAGCUCUCCUCCAGCUCAGCUGGUCAGGAGAGCUGAGACUAGAAAGCCCAGGGCAGGUUC	#N/A	#N/A	#N/A	#N/A	#N/A
hsa-mir-6748	MI0022593	Chr11	62789815	62789885	+	UGGUGUGUGGGUGGGAAGGACUGGAUUUGAAAUGGUCCCACUCCUGACGAUCCUGUCCCUGUCUCCUACAG	#N/A	#N/A	#N/A	#N/A	#N/A
hsa-mir-6514	MI0022226	Chr11	62792702	62792771	-	UAUGGAGUGGACUUUCAGCUGGCAUUUACGAGUCAGAGUUCUUACAGAGCUGCCUGUUCUUCCACUCCAG	#N/A	#N/A	#N/A	#N/A	#N/A
hsa-mir-7113	MI0022964	Chr11	68032864	68032922	+	CUCCAGGGAGACAGUGUGUGAGGCCUCUUGCCAUGGCCUCCCUGCCCGCCUCUCUGCAG	#N/A	#N/A	#N/A	#N/A	#N/A
hsa-mir-4691	MI0017324	Chr11	68033897	68033981	+	GGAGCACUCCCAGGUCCUCCAGGCCAUGAGCUGCGGCCCUGAUGUCUCUACUCCAGCCACGGACUGAGAGUGCAUAGGAGUGUCC	#N/A	#N/A	#N/A	#N/A	#N/A
hsa-mir-34b	MI0000742	Chr11	111512938	111513021	+	GUGCUCGGUUUGUAGGCAGUGUCAUUAGCUGAUUGUACUGUGGUGGUUACAAUCACUAACUCCACUGCCAUCAAAACAAGGCAC	#N/A	#N/A	#N/A	#N/A	#N/A
hsa-mir-34c	MI0000743	Chr11	111513439	111513515	+	AGUCUAGUUACUAGGCAGUGUAGUUAGCUGAUUGCUAAUAGUACCAAUCACUAACCACACGGCCAGGUAAAAAGAUU	#N/A	#N/A	#N/A	#N/A	#N/A
hsa-mir-200c	MI0000650	Chr12	6963699	6963766	+	CCCUCGUCUUACCCAGCAGUGUUUGGGUGCGGUUGGGAGUCUCUAAUACUGCCGGGUAAUGAUGGAGG	5.00264	13.4629	41.0676	1.47055e-10	2.05288e-08
hsa-mir-141	MI0000457	Chr12	6964097	6964191	+	CGGCCGGCCCUGGGUCCAUCUUCCAGUACAGUGUUGGAUGGUCUAAUUGUGAAGCUCCUAACACUGUCUGGUAAAGAUGGCUCCCGGGUGGGUUC	5.63302	11.0171	47.1351	6.62592e-12	1.15622e-09
hsa-mir-6758	MI0022603	Chr12	57512688	57512750	+	UGGGCUAGAGAGGGGAAGGAUGUGAUGUGAGCAGAUGGUUCUCACUCAUUCUCCUCUGUCCAG	#N/A	#N/A	#N/A	#N/A	#N/A
hsa-mir-616	MI0003629	Chr12	57519163	57519259	-	UUAGGUAAUUCCUCCACUCAAAACCCUUCAGUGACUUCCAUGACAUGAAAUAGGAAGUCAUUGGAGGGUUUGAGCAGAGGAAUGACCUGUUUUAAAA	2.3669	1.71965	10.8734	0.000975561	0.0141863
hsa-mir-548c	MI0003630	Chr12	64622509	64622605	+	CAUUGGCAUCUAUUAGGUUGGUGCAAAAGUAAUUGCGGUUUUUGCCAUUACUUUCAGUAGCAAAAAUCUCAAUUACUUUUGCACCAACUUAAUACUU	#N/A	#N/A	#N/A	#N/A	#N/A
hsa-mir-548z	MI0016688	Chr12	64622509	64622605	-	AAGUAUUAAGUUGGUGCAAAAGUAAUUGAGAUUUUUGCUACUGAAAGUAAUGGCAAAAACCGCAAUUACUUUUGCACCAACCUAAUAGAUGCCAAUG	#N/A	#N/A	#N/A	#N/A	#N/A
hsa-mir-3913-2	MI0016418	Chr12	69584723	69584822	+	UGUCUAUAAUAAACUGAAAUAUUUGGGACUGAUCUUGAUGUCUGCCAAGGUUUUGGCAGACAUCAAGAUCAGUCCCAAAUAUUUCAGUUUAUUAUAAACA	#N/A	#N/A	#N/A	#N/A	#N/A
hsa-mir-3913-1	MI0016417	Chr12	69584722	69584823	-	UUGUUUAUAAUAAACUGAAAUAUUUGGGACUGAUCUUGAUGUCUGCCAAAACCUUGGCAGACAUCAAGAUCAGUCCCAAAUAUUUCAGUUUAUUAUAGACAG	#N/A	#N/A	#N/A	#N/A	#N/A
hsa-mir-5700	MI0019307	Chr12	94561789	94561859	+	UUAAUUAAUGCAUUAAAUUAUUGAAGGCCCUUGGGCACCCCAGGCCUUCAAUAAUUUAAUGCAUUUAUUGA	#N/A	#N/A	#N/A	#N/A	#N/A
hsa-mir-7844	MI0025514	Chr12	94571231	94571352	-	UGAUUGUGCGGACUCGUGUGUAAGAAAAACUAGGACUGUGUGGUGUAAAUAACUACAAUUCUCUUAACUCCGUAGCAGUUGCCAACUCAGUCCUUGUACUUCGUUAACACGAAUCUGUUUCA	#N/A	#N/A	#N/A	#N/A	#N/A
hsa-mir-331	MI0000812	Chr12	95308420	95308513	+	GAGUUUGGUUUUGUUUGGGUUUGUUCUAGGUAUGGUCCCAGGGAUCCCAGAUCAAACCAGGCCCCUGGGCCUAUCCUAGAACCAACCUAAGCUC	2.38072	4.75138	15.8044	7.02392e-05	0.0017828
hsa-mir-3685	MI0016086	Chr12	95309923	95309984	+	GUACAUUUCCUACCCUACCUGAAGACUUGAGAUUAUAGUCUUUGGGGGGAUGGGCAAAGUAC	#N/A	#N/A	#N/A	#N/A	#N/A
hsa-mir-15a	MI0000069	Chr13	50049119	50049201	-	CCUUGGAGUAAAGUAGCAGCACAUAAUGGUUUGUGGAUUUUGAAAAGGUGCAGGCCAUAUUGUGCUGCCUCAAAAAUACAAGG	2.10832	7.79194	17.236	3.30128e-05	0.00104741
hsa-mir-16-1	MI0000070	Chr13	50048973	50049061	-	GUCAGCAGUGCCUUAGCAGCACGUAAAUAUUGGCGUUAAGAUUCUAAAAUUAUCUCCAGUAUUAACUGUGCUGCUGAAGUAAGGUUGAC	3.08361	8.69562	25.7144	3.95863e-07	2.76312e-05
hsa-mir-342	MI0000805	Chr14	100109655	100109753	+	GAAACUGGGCUCAAGGUGAGGGGUGCUAUCUGUGAUUGAGGGACAUGGUUAAUGGAAUUGUCUCACACAGAAAUCGCACCCGUCACCUUGGCCUACUUA	#N/A	#N/A	#N/A	#N/A	#N/A
hsa-mir-151b	MI0003772	Chr14	100109419	100109514	-	ACCUCUGAUGUGUCAGUCUCUCUUCAGGGCUCCCGAGACACAGAAACAGACACCUGCCCUCGAGGAGCUCACAGUCUAGACAAACAAACCCAGGGU	#N/A	#N/A	#N/A	#N/A	#N/A
hsa-mir-203a	MI0000283	Chr14	104117405	104117514	+	GUGUUGGGGACUCGCGCGCUGGGUCCAGUGGUUCUUAACAGUUCAACAGUUCUGUAGCGCAAUUGUGAAAUGUUUAGGACCACUAGACCCGGCGGGCGCGGCGACAGCGA	6.56064	15.7549	17.7524	2.51599e-05	0.000843755
hsa-mir-203b	MI0017343	Chr14	104117418	104117503	-	GCGCCCGCCGGGUCUAGUGGUCCUAAACAUUUCACAAUUGCGCUACAGAACUGUUGAACUGUUAAGAACCACUGGACCCAGCGCGC	5.50017	7.30903	16.5573	4.72021e-05	0.00131788
hsa-mir-7973-1	MI0025748	Chr15	51314034	51314109	+	UGUGACCCUAGAAUAAUUACCCAACGUCUCUGAGUCUCGGUUUUGAGAGGGUGAGUAAUUAUUCUAGGGUCACACA	#N/A	#N/A	#N/A	#N/A	#N/A
hsa-mir-7973-2	MI0025749	Chr15	51314032	51314107	-	UGUGACCCUAGAAUAAUUACUCACCCUCUCAAAACCGAGACUCAGAGACGUUGGGUAAUUAUUCUAGGGUCACACA	#N/A	#N/A	#N/A	#N/A	#N/A
hsa-mir-5587	MI0019144	Chr16	535316	535368	+	AUGGUCACCUCCGGGACUCAGCCCUGUGCUGAGCCCCGGGCAGUGUGAUCAUC	#N/A	#N/A	#N/A	#N/A	#N/A
hsa-mir-3176	MI0014210	Chr16	543277	543366	+	UGGCCUCUCCAGUCUGCAGCUCCCGGCAGCCUCGGGCCACACUCCCGGGAUCCCCAGGGACUGGCCUGGGACUACCGGGGGUGGCGGCCG	3.48802	-0.574271	8.07607	0.00448537	0.0414674
hsa-mir-4516	MI0016882	Chr16	2133119	2133204	+	AGGGAGAAGGGUCGGGGCAGGGAGGGCAGGGCAGGCUCUGGGGUGGGGGGUCUGUGAGUCAGCCACGGCUCUGCCCACGUCUCCCC	#N/A	#N/A	#N/A	#N/A	#N/A
hsa-mir-3180-5	MI0016409	Chr16	2135977	2136129	-	GCUCCGCCCCACGUCGCAUGCGCCCCGGGAACGCGUGGGGCGGAGCUUCCGGAGGCCCCGCCCUGCUGCCGACCCUGUGGAGCGGAGGGUGAAGCCUCCGGAUGCCAGUCCCUCAUCGCUGGCCCGGUCGCGCUGUGGCGAAGGGGGCGGAGC	#N/A	#N/A	#N/A	#N/A	#N/A
hsa-mir-193b	MI0003137	Chr16	14303967	14304049	+	GUGGUCUCAGAAUCGGGGUUUUGAGGGCGAGAUGAGUUUAUGUUUUAUCCAACUGGCCCUCAAAGUCCCGCUUUUGGGGUCAU	#N/A	#N/A	#N/A	#N/A	#N/A
hsa-mir-365a	MI0000767	Chr16	14309285	14309371	+	ACCGCAGGGAAAAUGAGGGACUUUUGGGGGCAGAUGUGUUUCCAUUCCACUAUCAUAAUGCCCCUAAAAAUCCUUAUUGCUCUUGCA	#N/A	#N/A	#N/A	#N/A	#N/A
hsa-mir-6511a-1	MI0022223	Chr16	14925937	14926003	+	CCUGCAGGCAGAAGUGGGGCUGACAGGGCAGAGGGUUGCGCCCCCUCACCAUCCCUUCUGCCUGCAG	#N/A	#N/A	#N/A	#N/A	#N/A
hsa-mir-6770-1	MI0022615	Chr16	14930820	14930879	+	UAUCCUGAGAAGGCACAGCUUGCACGUGACCUCCUGGGCCUGGCGGCUGUGUCUUCACAG	#N/A	#N/A	#N/A	#N/A	#N/A
hsa-mir-6511a-2	MI0023564	Chr16	16324588	16324654	+	CCUGCAGGCAGAAGUGGGGCUGACAGGGCAGAGGGUUGCGCCCCCUCACCAUCCCUUCUGCCUGCAG	#N/A	#N/A	#N/A	#N/A	#N/A
hsa-mir-6770-2	MI0026418	Chr16	16329305	16329364	+	UAUCCUGAGAAGGCACAGCUUGCACGUGACCUCCUGGGCCUGGCGGCUGUGUCUUCACAG	#N/A	#N/A	#N/A	#N/A	#N/A
hsa-mir-3179-4	MI0031510	Chr16	18494493	18494576	-	CAGGAUCACAGACGUUUAAAUUACACUCCUUCUGCUGUGCCUUACAGCAGUAGAAGGGGUGAAAUUUAAACGUCUGUGAUCCUG	#N/A	#N/A	#N/A	#N/A	#N/A
hsa-mir-3670-4	MI0031514	Chr16	18488301	18488365	-	UCUAGACUGGUAUAGCUGCUUUUGGAGCCUCACCUGCUGAGAGCUCACAGCUGUCCUUCUCUAGA	#N/A	#N/A	#N/A	#N/A	#N/A
hsa-mir-212	MI0000288	Chr17	2050271	2050380	-	CGGGGCACCCCGCCCGGACAGCGCGCCGGCACCUUGGCUCUAGACUGCUUACUGCCCGGGCCGCCCUCAGUAACAGUCUCCAGUCACGGCCACCGACGCCUGGCCCCGCC	#N/A	#N/A	#N/A	#N/A	#N/A
hsa-mir-132	MI0000449	Chr17	2049908	2050008	-	CCGCCCCCGCGUCUCCAGGGCAACCGUGGCUUUCGAUUGUUACUGUGGGAACUGGAGGUAACAGUCUACAGCCAUGGUCGCCCCGCAGCACGCCCACGCGC	#N/A	#N/A	#N/A	#N/A	#N/A
hsa-mir-6865	MI0022712	Chr17	4970086	4970150	-	AUCCAUAGGUGGCAGAGGAGGGACUUCAGAUGCUUCAUGACACCCUCUUUCCCUACCGCCUACAG	#N/A	#N/A	#N/A	#N/A	#N/A
hsa-mir-6864	MI0022711	Chr17	4969702	4969771	-	GAAAGUUGAAGGGACAAGUCAGAUAUGCCAUUAUGUGGGUCAUGAGGUGGUGAGACUUCUCUCCCUUCAG	#N/A	#N/A	#N/A	#N/A	#N/A
hsa-mir-4520-2	MI0017358	Chr17	6655449	6655502	+	CCUGCGUGUUUUCUGUCCAAAUCCUUUUCUGAUUUGGACAGAAAACACGCAGGU	#N/A	#N/A	#N/A	#N/A	#N/A
hsa-mir-4520-1	MI0016886	Chr17	6655440	6655509	-	GUGUGCCACCUGCGUGUUUUCUGUCCAAAUCAGAAAAGGAUUUGGACAGAAAACACGCAGGAAGAAGGAA	#N/A	#N/A	#N/A	#N/A	#N/A
hsa-mir-497	MI0003138	Chr17	7017911	7018022	-	CCACCCCGGUCCUGCUCCCGCCCCAGCAGCACACUGUGGUUUGUACGGCACUGUGGCCACGUCCAAACCACACUGUGGUGUUAGAGCGAGGGUGGGGGAGGCACCGCCGAGG	#N/A	#N/A	#N/A	#N/A	#N/A
hsa-mir-195	MI0000489	Chr17	7017615	7017701	-	AGCUUCCCUGGCUCUAGCAGCACAGAAAUAUUGGCACAGGGAAGCGAGUCUGCCAAUAUUGGCUGUGCUGCUCCAGGCAGGGUGGUG	#N/A	#N/A	#N/A	#N/A	#N/A
hsa-mir-33b	MI0003646	Chr17	17813836	17813931	-	GCGGGCGGCCCCGCGGUGCAUUGCUGUUGCAUUGCACGUGUGUGAGGCGGGUGCAGUGCCUCGGCAGUGCAGCCCGGAGCCGGCCCCUGGCACCAC	4.76181	3.00774	18.1266	2.06696e-05	0.00072137
hsa-mir-6777	MI0022622	Chr17	17813480	17813545	-	UCAAGACGGGGAGUCAGGCAGUGGUGGAGAUGGAGAGCCCUGAGCCUCCACUCUCCUGGCCCCCAG	#N/A	#N/A	#N/A	#N/A	#N/A
hsa-mir-423	MI0001445	Chr17	30117079	30117172	+	AUAAAGGAAGUUAGGCUGAGGGGCAGAGAGCGAGACUUUUCUAUUUUCCAAAAGCUCGGUCUGAGGCCCCUCAGUCUUGCUUCCUAACCCGCGC	#N/A	#N/A	#N/A	#N/A	#N/A
hsa-mir-3184	MI0014226	Chr17	30117086	30117160	-	AAGCAAGACUGAGGGGCCUCAGACCGAGCUUUUGGAAAAUAGAAAAGUCUCGCUCUCUGCCCCUCAGCCUAACUU	#N/A	#N/A	#N/A	#N/A	#N/A
hsa-mir-4725	MI0017362	Chr17	31575269	31575358	+	GUGUCUCUCUGGAGACCCUGCAGCCUUCCCACCCACCAGGGAGCUUUCCAUGGGCUGUGGGGAAGGCGUCAGUGUCGGGUGAGGGAACAC	#N/A	#N/A	#N/A	#N/A	#N/A
hsa-mir-365b	MI0000769	Chr17	31575411	31575521	+	AGAGUGUUCAAGGACAGCAAGAAAAAUGAGGGACUUUCAGGGGCAGCUGUGUUUUCUGACUCAGUCAUAAUGCCCCUAAAAAUCCUUAUUGUUCUUGCAGUGUGCAUCGGG	#N/A	#N/A	#N/A	#N/A	#N/A
hsa-mir-10226	MI0033056	Chr17	48032882	48032951	+	GAGGGAACUUCCAUGUGUCUGGGCUGGGAAACUGGAGUUCUCCACUGGGAGACAUUGAGUGUAUCCUUCU	#N/A	#N/A	#N/A	#N/A	#N/A
hsa-mir-152	MI0000462	Chr17	48037161	48037247	-	UGUCCCCCCCGGCCCAGGUUCUGUGAUACACUCCGACUCGGGCUCUGGAGCAGUCAGUGCAUGACAGAACUUGGGCCCGGAAGGACC	#N/A	#N/A	#N/A	#N/A	#N/A
hsa-mir-4736	MI0017373	Chr17	58335976	58336022	-	AGGCAGGUUAUCUGGGCUGCCAUCUCCCACUGGCUGCUUGCCUGCCU	#N/A	#N/A	#N/A	#N/A	#N/A
hsa-mir-142	MI0000458	Chr17	58331232	58331318	-	GACAGUGCAGUCACCCAUAAAGUAGAAAGCACUACUAACAGCACUGGAGGGUGUAGUGUUUCCUACUUUAUGGAUGAGUGUACUGUG	4.39086	11.3735	22.6098	1.98466e-06	0.000101815
hsa-mir-5047	MI0017932	Chr17	64501214	64501313	-	GAAGCGCUUGCCUAGACGAGACACAGUGCAUAAAAACAACUUUUGGGGGACAGGUAUGUUUUCUUGCAGCUGCGGUUGUAAGGUCUUGGCAAGACAAGCA	#N/A	#N/A	#N/A	#N/A	#N/A
hsa-mir-3064	MI0017375	Chr17	64500774	64500839	-	GGUCUGGCUGUUGUGGUGUGCAAAACUCCGUACAUUGCUAUUUUGCCACACUGCAACACCUUACAG	#N/A	#N/A	#N/A	#N/A	#N/A
hsa-mir-548d-2	MI0003671	Chr17	67471489	67471585	-	GAGAGGGAAGAUUUAGGUUGGUGCAAAAGUAAUUGUGGUUUUUGCCAUUGAAAGUAAUGGCAAAAACCACAGUUUCUUUUGCACCAACCUAAUAAAA	3.54007	-0.561129	8.9566	0.00276469	0.0290189
hsa-mir-548aa-2	MI0016690	Chr17	67471489	67471585	+	UUUUAUUAGGUUGGUGCAAAAGAAACUGUGGUUUUUGCCAUUACUUUCAAUGGCAAAAACCACAAUUACUUUUGCACCAACCUAAAUCUUCCCUCUC	#N/A	#N/A	#N/A	#N/A	#N/A
hsa-mir-4524b	MI0019114	Chr17	69099542	69099656	+	UAGCUGGGUGGAUGUGUUCUUUUGAAGGAUAGCAGCAUAAGCCUGUCUCAAAAUAAUUCUGCAGUGAGACAGGUUCAUGCUGCUAUCGUUCCAAAGAGGAAGGGUAAUCACUGUC	#N/A	#N/A	#N/A	#N/A	#N/A
hsa-mir-4524a	MI0016891	Chr17	69099564	69099632	-	GAACGAUAGCAGCAUGAACCUGUCUCACUGCAGAAUUAUUUUGAGACAGGCUUAUGCUGCUAUCCUUCA	#N/A	#N/A	#N/A	#N/A	#N/A
hsa-mir-1-2	MI0000437	Chr18	21829004	21829088	-	ACCUACUCAGAGUACAUACUUCUUUAUGUACCCAUAUGAACAUACAAUGCUAUGGAAUGUAAAGAAGUAUGUAUUUUUGGUAGGC	-3.53952	3.31748	47.1614	6.53745e-12	1.15622e-09
hsa-mir-133a-1	MI0000450	Chr18	21825698	21825785	-	ACAAUGCUUUGCUAGAGCUGGUAAAAUGGAACCAAAUCGCCUCUUCAAUGGAUUUGGUCCCCUUCAACCAGCUGUAGCUAUGCAUUGA	-3.81766	2.78029	55.7013	8.4363e-14	2.94427e-11
hsa-mir-5583-1	MI0019139	Chr18	39676721	39676779	+	AAACUAAUAUACCCAUAUUCUGGCUAGGUGAUCAUCAGAAUAUGGGUAUAUUAGUUUGG	#N/A	#N/A	#N/A	#N/A	#N/A
hsa-mir-5583-2	MI0019140	Chr18	39676719	39676777	-	AAACUAAUAUACCCAUAUUCUGAUGAUCACCUAGCCAGAAUAUGGGUAUAUUAGUUUGG	#N/A	#N/A	#N/A	#N/A	#N/A
hsa-mir-122	MI0000442	Chr18	58451074	58451158	+	CCUUAGCAGAGCUGUGGAGUGUGACAAUGGUGUUUGUGUCUAAACUAUCAAACGCCAUUAUCACACUAAAUAGCUACUGCUAGGC	#N/A	#N/A	#N/A	#N/A	#N/A
hsa-mir-122b	MI0017383	Chr18	58451080	58451152	-	CAGUAGCUAUUUAGUGUGAUAAUGGCGUUUGAUAGUUUAGACACAAACACCAUUGUCACACUCCACAGCUCUG	#N/A	#N/A	#N/A	#N/A	#N/A
hsa-mir-4745	MI0017384	Chr19	804940	805001	+	GUGAGUGGGGCUCCCGGGACGGCGCCCGCCCUGGCCCUGGCCCGGCGACGUCUCACGGUCCC	#N/A	#N/A	#N/A	#N/A	#N/A
hsa-mir-3187	MI0014231	Chr19	813584	813653	+	GCUGGCCCUGGGCAGCGUGUGGCUGAAGGUCACCAUGUUCUCCUUGGCCAUGGGGCUGCGCGGGGCCAGC	#N/A	#N/A	#N/A	#N/A	#N/A
hsa-mir-6789	MI0022634	Chr19	2235829	2235926	-	CGAGGUAGGGGCGUCCCGGGCGCGCGGGCGGGUCCCAGGCUGGGCCCCUCGGAGGCCGGGUGCUCACUGCCCCGUCCCGGCGCCCGUGUCUCCUCCAG	#N/A	#N/A	#N/A	#N/A	#N/A
hsa-mir-1227	MI0006316	Chr19	2234062	2234149	-	GUGGGGCCAGGCGGUGGUGGGCACUGCUGGGGUGGGCACAGCAGCCAUGCAGAGCGGGCAUUUGACCCCGUGCCACCCUUUUCCCCAG	#N/A	#N/A	#N/A	#N/A	#N/A
hsa-mir-6790	MI0022635	Chr19	6392921	6392983	-	GUGAGUGUGGAUUUGGCGGGGUUCGGGGGUUCCGACGGCGACCUCGGCGACCCCUCACUCACC	#N/A	#N/A	#N/A	#N/A	#N/A
hsa-mir-6885	MI0022732	Chr19	6389638	6389703	-	CCUGGAGGGGGGCACUGCGCAAGCAAAGCCAGGGACCCUGAGAGGCUUUGCUUCCUGCUCCCCUAG	#N/A	#N/A	#N/A	#N/A	#N/A
hsa-mir-181c	MI0000271	Chr19	13874699	13874808	+	CGGAAAAUUUGCCAAGGGUUUGGGGGAACAUUCAACCUGUCGGUGAGUUUGGGCAGCUCAGGCAAACCAUCGACCGUUGAGUGGACCCUGAGGCCUGGAAUUGCCAUCCU	#N/A	#N/A	#N/A	#N/A	#N/A
hsa-mir-181d	MI0003139	Chr19	13874875	13875011	+	GUCCCCUCCCCUAGGCCACAGCCGAGGUCACAAUCAACAUUCAUUGUUGUCGGUGGGUUGUGAGGACUGAGGCCAGACCCACCGGGGGAUGAAUGUCACUGUGGCUGGGCCAGACACGGCUUAAGGGGAAUGGGGAC	#N/A	#N/A	#N/A	#N/A	#N/A
hsa-mir-642a	MI0003657	Chr19	45674928	45675024	+	AUCUGAGUUGGGAGGGUCCCUCUCCAAAUGUGUCUUGGGGUGGGGGAUCAAGACACAUUUGGAGAGGGAACCUCCCAACUCGGCCUCUGCCAUCAUU	3.90224	1.52623	14.3916	0.000148466	0.00351286
hsa-mir-642b	MI0016685	Chr19	45674932	45675008	-	GAGUUGGGAGGUUCCCUCUCCAAAUGUGUCUUGAUCCCCCACCCCAAGACACAUUUGGAGAGGGACCCUCCCAACUC	#N/A	#N/A	#N/A	#N/A	#N/A
hsa-mir-3190	MI0014235	Chr19	47226942	47227021	+	CUGGGGUCACCUGUCUGGCCAGCUACGUCCCCACGGCCCUUGUCAGUGUGGAAGGUAGACGGCCAGAGAGGUGACCCCGG	#N/A	#N/A	#N/A	#N/A	#N/A
hsa-mir-3191	MI0014236	Chr19	47226944	47227019	-	GGGGUCACCUCUCUGGCCGUCUACCUUCCACACUGACAAGGGCCGUGGGGACGUAGCUGGCCAGACAGGUGACCCC	#N/A	#N/A	#N/A	#N/A	#N/A
hsa-mir-10394	MI0033418	Chr19	58393364	58393446	+	UCUGCAGGUCCUGGUGAACGCCAUCAUCAACAGUGGUCCCCGGGAGGACUCCACACGCAUUGGGCGCGCCGGGACUGUGAGAC	#N/A	#N/A	#N/A	#N/A	#N/A
hsa-mir-4754	MI0017394	Chr19	58386770	58386858	-	ACGCGCCUGAUGCGGACCUGGGUUAGCGGAGUGAGGCCCAGUGGUCACCGCCGCCCUCCGCAGGUCCAGGUUGCCGUGCGCAUGUGCCU	#N/A	#N/A	#N/A	#N/A	#N/A
hsa-mir-216a	MI0000292	Chr2	55988950	55989059	-	GAUGGCUGUGAGUUGGCUUAAUCUCAGCUGGCAACUGUGAGAUGUUCAUACAAUCCCUCACAGUGGUCUCUGGGAUUAUGCUAAACAGAGCAAUUUCCUAGCCCUCACGA	#N/A	#N/A	#N/A	#N/A	#N/A
hsa-mir-217	MI0000293	Chr2	55982967	55983076	-	AGUAUAAUUAUUACAUAGUUUUUGAUGUCGCAGAUACUGCAUCAGGAACUGAUUGGAUAAGAAUCAGUCACCAUCAGUUCCUAAUGCAUUGCCUUCAGCAUCUAAACAAG	#N/A	#N/A	#N/A	#N/A	#N/A
hsa-mir-4433a	MI0016773	Chr2	64340759	64340839	+	CAUCCUCCUUACGUCCCACCCCCCACUCCUGUUUCUGGUGAAAUAUUCAAACAGGAGUGGGGGUGGGACAUAAGGAGGAUA	#N/A	#N/A	#N/A	#N/A	#N/A
hsa-mir-4433b	MI0025511	Chr2	64340747	64340848	-	UGUGUUCCCUAUCCUCCUUAUGUCCCACCCCCACUCCUGUUUGAAUAUUUCACCAGAAACAGGAGUGGGGGGUGGGACGUAAGGAGGAUGGGGGAAAGAACA	#N/A	#N/A	#N/A	#N/A	#N/A
hsa-mir-4773-1	MI0017415	Chr2	151368334	151368411	+	UGCUCCCCAGCCUUUCUAUGCUCCUGUUCUGCUUUAUUUCAUCAAAGCAGAACAGGAGCAUAGAAAGGCUGGGGAGCA	#N/A	#N/A	#N/A	#N/A	#N/A
hsa-mir-4773-2	MI0017416	Chr2	151368334	151368411	-	UGCUCCCCAGCCUUUCUAUGCUCCUGUUCUGCUUUGAUGAAAUAAAGCAGAACAGGAGCAUAGAAAGGCUGGGGAGCA	#N/A	#N/A	#N/A	#N/A	#N/A
hsa-mir-1245a	MI0006380	Chr2	188978092	188978161	+	AUUUAUGUAUAGGCCUUUAGAUCAUCUGAUGUUGAAUACUCUUUAAGUGAUCUAAAGGCCUACAUAUAAA	#N/A	#N/A	#N/A	#N/A	#N/A
hsa-mir-1245b	MI0017431	Chr2	188978093	188978161	-	UUUAUAUGUAGGCCUUUAGAUCACUUAAAGAGUAUUCAACAUCAGAUGAUCUAAAGGCCUAUACAUAAA	#N/A	#N/A	#N/A	#N/A	#N/A
hsa-mir-3130-1	MI0014147	Chr2	206783234	206783308	-	CUUGUCAUGUCUUACCCAGUCUCCGGUGCAGCCUGUUGUCAAGGCUGCACCGGAGACUGGGUAAGACAUGACAAG	#N/A	#N/A	#N/A	#N/A	#N/A
hsa-mir-3130-2	MI0014148	Chr2	206783234	206783308	+	CUUGUCAUGUCUUACCCAGUCUCCGGUGCAGCCUUGACAACAGGCUGCACCGGAGACUGGGUAAGACAUGACAAG	#N/A	#N/A	#N/A	#N/A	#N/A
hsa-mir-4776-1	MI0017419	Chr2	212926257	212926336	+	CUAUAUGCAGUGGACCAGGAUGGCAAGGGCUCUCCUGAAAGGACAGUAGAGCCCUUGCCAUCCUGGUCCACUGCAUAUAG	#N/A	#N/A	#N/A	#N/A	#N/A
hsa-mir-4776-2	MI0017420	Chr2	212926257	212926336	-	CUAUAUGCAGUGGACCAGGAUGGCAAGGGCUCUACUGUCCUUUCAGGAGAGCCCUUGCCAUCCUGGUCCACUGCAUAUAG	#N/A	#N/A	#N/A	#N/A	#N/A
hsa-mir-103a-2	MI0000108	Chr20	3917494	3917571	+	UUGUGCUUUCAGCUUCUUUACAGUGCUGCCUUGUAGCAUUCAGGUCAAGCAGCAUUGUACAGGGCUAUGAAAGAACCA	#N/A	#N/A	#N/A	#N/A	#N/A
hsa-mir-103b-2	MI0007262	Chr20	3917502	3917563	-	UCAUAGCCCUGUACAAUGCUGCUUGACCUGAAUGCUACAAGGCAGCACUGUAAAGAAGCUGA	#N/A	#N/A	#N/A	#N/A	#N/A
hsa-mir-499a	MI0003183	Chr20	34990376	34990497	+	GCCCUGUCCCCUGUGCCUUGGGCGGGCGGCUGUUAAGACUUGCAGUGAUGUUUAACUCCUCUCCACGUGAACAUCACAGCAAGUCUGUGCUGCUUCCCGUCCCUACGCUGCCUGGGCAGGGU	#N/A	#N/A	#N/A	#N/A	#N/A
hsa-mir-499b	MI0017396	Chr20	34990400	34990472	-	GGAAGCAGCACAGACUUGCUGUGAUGUUCACGUGGAGAGGAGUUAAACAUCACUGCAAGUCUUAACAGCCGCC	#N/A	#N/A	#N/A	#N/A	#N/A
hsa-mir-298	MI0005523	Chr20	58818226	58818313	-	UCAGGUCUUCAGCAGAAGCAGGGAGGUUCUCCCAGUGGUUUUCCUUGACUGUGAGGAACUAGCCUGCUGCUUUGCUCAGGAGUGAGCU	#N/A	#N/A	#N/A	#N/A	#N/A
hsa-mir-296	MI0000747	Chr20	58817615	58817694	-	AGGACCCUUCCAGAGGGCCCCCCCUCAAUCCUGUUGUGCCUAAUUCAGAGGGUUGGGUGGAGGCUCUCCUGAAGGGCUCU	#N/A	#N/A	#N/A	#N/A	#N/A
hsa-mir-647	MI0003662	Chr20	63942631	63942726	-	AGGAAGUGUUGGCCUGUGGCUGCACUCACUUCCUUCAGCCCCAGGAAGCCUUGGUCGGGGGCAGGAGGGAGGGUCAGGCAGGGCUGGGGGCCUGAC	#N/A	#N/A	#N/A	#N/A	#N/A
hsa-mir-1914	MI0008335	Chr20	63941465	63941544	-	CGUGUGAGCCCGCCCUGUGCCCGGCCCACUUCUGCUUCCUCUUAGCGCAGGAGGGGUCCCGCACUGGGAGGGGCCCUCAC	#N/A	#N/A	#N/A	#N/A	#N/A
hsa-mir-6724-2	MI0031516	Chr21	8249505	8249596	+	CGCUGCGCUUCUGGGCCCGCGGCGGGCGUGGGGCUGCCCGGGCCGGUCGACCAGCGCGCCGUAGCUCCCGAGGCCCGAGCCGCGACCCGCGG	#N/A	#N/A	#N/A	#N/A	#N/A
hsa-mir-10401	MI0033425	Chr21	8206563	8206618	+	CGUGUGGGAAGGCGUGGGGUGCGGACCCCGGCCCGACCUCGCCGUCCCGCCCGCCG	#N/A	#N/A	#N/A	#N/A	#N/A
hsa-mir-10401	MI0033425	Chr21	8250772	8250827	+	CGUGUGGGAAGGCGUGGGGUGCGGACCCCGGCCCGACCUCGCCGUCCCGCCCGCCG	#N/A	#N/A	#N/A	#N/A	#N/A
hsa-mir-10401	MI0033425	Chr21	8389610	8389665	+	CGUGUGGGAAGGCGUGGGGUGCGGACCCCGGCCCGACCUCGCCGUCCCGCCCGCCG	#N/A	#N/A	#N/A	#N/A	#N/A
hsa-mir-10401	MI0033425	Chr21	8433797	8433852	+	CGUGUGGGAAGGCGUGGGGUGCGGACCCCGGCCCGACCUCGCCGUCCCGCCCGCCG	#N/A	#N/A	#N/A	#N/A	#N/A
hsa-mir-6724-3	MI0031517	Chr21	8388362	8388453	+	CGCUGCGCUUCUGGGCCCGCGGCGGGCGUGGGGCUGCCCGGGCCGGUCGACCAGCGCGCCGUAGCUCCCGAGGCCCGAGCCGCGACCCGCGG	#N/A	#N/A	#N/A	#N/A	#N/A
hsa-mir-10401	MI0033425	Chr21	8206563	8206618	+	CGUGUGGGAAGGCGUGGGGUGCGGACCCCGGCCCGACCUCGCCGUCCCGCCCGCCG	#N/A	#N/A	#N/A	#N/A	#N/A
hsa-mir-10401	MI0033425	Chr21	8250772	8250827	+	CGUGUGGGAAGGCGUGGGGUGCGGACCCCGGCCCGACCUCGCCGUCCCGCCCGCCG	#N/A	#N/A	#N/A	#N/A	#N/A
hsa-mir-10401	MI0033425	Chr21	8389610	8389665	+	CGUGUGGGAAGGCGUGGGGUGCGGACCCCGGCCCGACCUCGCCGUCCCGCCCGCCG	#N/A	#N/A	#N/A	#N/A	#N/A
hsa-mir-10401	MI0033425	Chr21	8433797	8433852	+	CGUGUGGGAAGGCGUGGGGUGCGGACCCCGGCCCGACCUCGCCGUCCCGCCCGCCG	#N/A	#N/A	#N/A	#N/A	#N/A
hsa-mir-3648-2	MI0031512	Chr21	8986999	8987178	+	CGCGACUGCGGCGGCGGUGGUGGGGGGAGCCGCGGGGAUCGCCGAGGGCCGGUCGGCCGCCCCGGGUGCCGCGCGGUGCCGCCGGCGGCGGUGAGGCCCCGCGCGUGUGUCCCGGCUGCGGUCGGCCGCGCUCGAGGGGUCCCCGUGGCGUCCCCUUCCCCGCCGGCCGCCUUUCUCGCG	#N/A	#N/A	#N/A	#N/A	#N/A
hsa-mir-10396a	MI0033420	Chr21	8987617	8987665	+	GGCGGGGCUCGGAGCCGGGCUUCGGCCGGGCCCCGGGCCCUCGACCGGG	#N/A	#N/A	#N/A	#N/A	#N/A
hsa-mir-99a	MI0000101	Chr21	16539089	16539169	+	CCCAUUGGCAUAAACCCGUAGAUCCGAUCUUGUGGUGAAGUGGACCGCACAAGCUCGCUUCUAUGGGUCUGUGUCAGUGUG	-1.99246	10.0255	8.93165	0.00280271	0.0291984
hsa-let-7c	MI0000064	Chr21	16539828	16539911	+	GCAUCCGGGUUGAGGUAGUAGGUUGUAUGGUUUAGAGUUACACCCUGGGAGUUAACUGUACAACCUUCUAGCUUUCCUUGGAGC	#N/A	#N/A	#N/A	#N/A	#N/A
hsa-mir-3618	MI0016008	Chr22	20085746	20085833	+	UAAGCUGAGUGCAUUGUGAUUUCCAAUAAUUGAGGCAGUGGUUCUAAAAGCUGUCUACAUUAAUGAAAAGAGCAAUGUGGCCAGCUUG	#N/A	#N/A	#N/A	#N/A	#N/A
hsa-mir-1306	MI0006443	Chr22	20086058	20086142	+	GUGAGCAGUCUCCACCACCUCCCCUGCAAACGUCCAGUGGUGCAGAGGUAAUGGACGUUGGCUCUGGUGGUGAUGGACAGUCCGA	#N/A	#N/A	#N/A	#N/A	#N/A
hsa-mir-301b	MI0005568	Chr22	21652981	21653058	+	GCCGCAGGUGCUCUGACGAGGUUGCACUACUGUGCUCUGAGAAGCAGUGCAAUGAUAUUGUCAAAGCAUCUGGGACCA	4.50147	1.23968	13.36	0.000257046	0.00529233
hsa-mir-130b	MI0000748	Chr22	21653304	21653385	+	GGCCUGCCCGACACUCUUUCCCUGUUGCACUACUAUAGGCCGCUGGGAAGCAGUGCAAUGAUGAAAGGGCAUCGGUCAGGUC	4.10271	5.61825	25.3361	4.81604e-07	3.056e-05
hsa-mir-3199-2	MI0014248	Chr22	27920526	27920611	+	GUGACUCCCAGGGACUGCCUUAGGAGAAAGUUUCUGGAAUGUCAGAACUUCCAGAAACUUUCUCCUAAGGCAGUCCCUGGAGUCAC	#N/A	#N/A	#N/A	#N/A	#N/A
hsa-mir-3199-1	MI0014247	Chr22	27920525	27920612	-	GGUGACUCCAGGGACUGCCUUAGGAGAAAGUUUCUGGAAGUUCUGACAUUCCAGAAACUUUCUCCUAAGGCAGUCCCUGGGAGUCACU	-1.79379	-0.613889	10.9022	0.000960489	0.0141141
hsa-mir-3909	MI0016413	Chr22	35335640	35335758	+	GGUAUGCUGUUGCGCUGUCCUUCCUCUGGGGAGCAGGCUCCGGGGGACAGGGAAAAGCACACAAGGAACUUGUCCUCUAGGGCCUGCAGUCUCAUGGGAGAGUGACAUGCACCAGGACC	#N/A	#N/A	#N/A	#N/A	#N/A
hsa-mir-6069	MI0020346	Chr22	35336721	35336799	-	UGGUGACCCCUGGGCUAGGGCCUGCUGCCCCCUGCCCAGUGCAGGAGGGUGGAGGGUCACUCCUUAGGUGGUCCCAGUG	#N/A	#N/A	#N/A	#N/A	#N/A
hsa-mir-659	MI0003683	Chr22	37847678	37847774	-	UACCGACCCUCGAUUUGGUUCAGGACCUUCCCUGAACCAAGGAAGAGUCACAGUCUCUUCCUUGGUUCAGGGAGGGUCCCCAACAAUGUCCUCAUGG	#N/A	#N/A	#N/A	#N/A	#N/A
hsa-mir-658	MI0003682	Chr22	37844272	37844371	-	GCUCGGUUGCCGUGGUUGCGGGCCCUGCCCGCCCGCCAGCUCGCUGACAGCACGACUCAGGGCGGAGGGAAGUAGGUCCGUUGGUCGGUCGGGAACGAGG	#N/A	#N/A	#N/A	#N/A	#N/A
hsa-mir-191	MI0000465	Chr3	49020618	49020709	-	CGGCUGGACAGCGGGCAACGGAAUCCCAAAAGCAGCUGUUGUCUCCAGAGCAUUCCAGCUGCGCUUGGAUUUCGUCCCCUGCUCUCCUGCCU	1.53442	8.90381	7.83542	0.00512323	0.0438775
hsa-mir-425	MI0001448	Chr3	49020148	49020234	-	GAAAGCGCUUUGGAAUGACACGAUCACUCCCGUUGAGUGGGCACCCGAGAAGCCAUCGGGAAUGUCGUGUCCGCCCAGUGCUCUUUC	2.89178	8.19818	13.9318	0.000189561	0.00421831
hsa-mir-15b	MI0000438	Chr3	160404588	160404685	+	UUGAGGCCUUAAAGUACUGUAGCAGCACAUCAUGGUUUACAUGCUACAGUCAAGAUGCGAAUCAUUAUUUGCUGCUCUAGAAAUUUAAGGAAAUUCAU	3.56055	8.9005	29.4709	5.67624e-08	6.09541e-06
hsa-mir-16-2	MI0000115	Chr3	160404745	160404825	+	GUUCCACUCUAGCAGCACGUAAAUAUUGGCGUAGUGAAAUAUAUAUUAAACACCAAUAUUACUGUGCUGCUUUAGUGUGAC	3.18167	8.7571	26.9743	2.06178e-07	1.59903e-05
hsa-mir-4450	MI0016795	Chr4	76573568	76573632	+	UGUCUGGGGAUUUGGAGAAGUGGUGAGCGCAGGUCUUUGGCACCAUCUCCCCUGGUCCCUUGGCU	#N/A	#N/A	#N/A	#N/A	#N/A
hsa-mir-548ah	MI0016796	Chr4	76575551	76575626	+	AGGUUGGUGCAAAAGUGAUUGCAGUGUUUGCCAAUAAAAGUAAUGACAAAAACUGCAGUUACUUUUGCACCAGCCC	#N/A	#N/A	#N/A	#N/A	#N/A
hsa-mir-3688-2	MI0017447	Chr4	159128805	159128891	+	UCACUUUAAAGAGUGGCAAAGUCUUUCCAUAUGUGUAACAGACAUACAUACAUACAUAUGGAAAGACUUUGCCACUCUUGAAAGUGA	#N/A	#N/A	#N/A	#N/A	#N/A
hsa-mir-3688-1	MI0016089	Chr4	159128802	159128894	-	UCUUCACUUUCAAGAGUGGCAAAGUCUUUCCAUAUGUAUGUAUGUAUGUCUGUUACACAUAUGGAAAGACUUUGCCACUCUUUAAAGUGAAGA	#N/A	#N/A	#N/A	#N/A	#N/A
hsa-mir-143	MI0000459	Chr5	149428918	149429023	+	GCGCAGCGCCCUGUCUCCCAGCCUGAGGUGCAGUGCUGCAUCUCUGGUCAGUUGGGAGUCUGAGAUGAAGCACUGUAGCUCAGGAAGAGAGAAGUUGUUCUGCAGC	-2.2328	16.2309	22.555	2.04214e-06	0.000101815
hsa-mir-145	MI0000461	Chr5	149430646	149430733	+	CACCUUGUCCUCACGGUCCAGUUUUCCCAGGAAUCCCUUAGAUGCUAAGAUGGGGAUUCCUGGAAAUACUGUUCUUGAGGUCAUGGUU	-3.61181	10.6275	77.6094	1.25568e-18	1.75293e-15
hsa-mir-103b-1	MI0007261	Chr5	168560904	168560965	+	UCAUAGCCCUGUACAAUGCUGCUUGAUCCAUAUGCAACAAGGCAGCACUGUAAAGAAGCCGA	#N/A	#N/A	#N/A	#N/A	#N/A
hsa-mir-103a-1	MI0000109	Chr5	168560896	168560973	-	UACUGCCCUCGGCUUCUUUACAGUGCUGCCUUGUUGCAUAUGGAUCAAGCAGCAUUGUACAGGGCUAUGAAGGCAUUG	#N/A	#N/A	#N/A	#N/A	#N/A
hsa-mir-5683	MI0019284	Chr6	6169334	6169409	+	GGAGCUUGUUACAGAUGCAGAUUCUCUGACUUCUUACUGCACCAGUGAAGUCAGGAUCUGCAUUUGAAUAAGACCC	#N/A	#N/A	#N/A	#N/A	#N/A
hsa-mir-7853	MI0025523	Chr6	6169304	6169435	-	UCUCACACUUCAAUAGGCAUUGUCUGGGGUCUUAUUCAAAUGCAGAUCCUGACUUCACUGGUGCAGUAAGAAGUCAGAGAAUCUGCAUCUGUAACAAGCUCCCAGGUGAUGAUGGUGCUGCUGGUGUGCAGA	#N/A	#N/A	#N/A	#N/A	#N/A
hsa-mir-6833	MI0022678	Chr6	32179816	32179876	+	AAACGGUGUGGAAGAUGGGAGGAGAAAAAUCCCUGUUAACUUUCUCUCUCCACUUCCUCAG	#N/A	#N/A	#N/A	#N/A	#N/A
hsa-mir-6721	MI0022556	Chr6	32170030	32170116	-	CCCUCAUCUCUGGGCAGGGGCUUAUUGUAGGAGUCUCUGAAGAGAGCUGUGGACUGACCUGCUUUAACCCUUCCCCAGGUUCCCAUU	#N/A	#N/A	#N/A	#N/A	#N/A
hsa-mir-6834	MI0022679	Chr6	33290245	33290325	+	GUGAGGGACUGGGAUUUGUGGGGCGAGGAGGGACCUGUACUAGCCAUGGUUCUGAUCACAUAUGUCCCAUCCCUCCAUCAG	#N/A	#N/A	#N/A	#N/A	#N/A
hsa-mir-6873	MI0022720	Chr6	33287227	33287289	-	CCCAGCAGAGGGAAUACAGAGGGCAAUCAGGACUGGGUCAUUCUCUCUGUCUUUCUCUCUCAG	#N/A	#N/A	#N/A	#N/A	#N/A
hsa-mir-206	MI0000490	Chr6	52144349	52144434	+	UGCUUCCCGAGGCCACAUGCUUCUUUAUAUCCCCAUAUGGAUUACUUUGCUAUGGAAUGUAAGGAAGUGUGUGGUUUCGGCAAGUG	#N/A	#N/A	#N/A	#N/A	#N/A
hsa-mir-133b	MI0000822	Chr6	52148923	52149041	+	CCUCAGAAGAAAGAUGCCCCCUGCUCUGGCUGGUCAAACGGAACCAAGUCCGUCUUCCUGAGAGGUUUGGUCCCCUUCAACCAGCUACAGCAGGGCUGGCAAUGCCCAGUCCUUGGAGA	-2.99951	0.914046	18.3665	1.82231e-05	0.000671123
hsa-mir-550a-1	MI0003600	Chr7	30289794	30289890	+	UGAUGCUUUGCUGGCUGGUGCAGUGCCUGAGGGAGUAAGAGCCCUGUUGUUGUAAGAUAGUGUCUUACUCCCUCAGGCACAUCUCCAACAAGUCUCU	#N/A	#N/A	#N/A	#N/A	#N/A
hsa-mir-550b-1	MI0016686	Chr7	30289794	30289890	-	AGAGACUUGUUGGAGAUGUGCCUGAGGGAGUAAGACACUAUCUUACAACAACAGGGCUCUUACUCCCUCAGGCACUGCACCAGCCAGCAAAGCAUCA	#N/A	#N/A	#N/A	#N/A	#N/A
hsa-mir-550a-2	MI0003601	Chr7	32732981	32733077	+	UGAUGCUUUGCUGGCUGGUGCAGUGCCUGAGGGAGUAAGAGCCCUGUUGUUGUCAGAUAGUGUCUUACUCCCUCAGGCACAUCUCCAGCGAGUCUCU	2.0864	2.01417	8.02715	0.00460814	0.0420455
hsa-mir-550b-2	MI0016687	Chr7	32732981	32733077	-	AGAGACUCGCUGGAGAUGUGCCUGAGGGAGUAAGACACUAUCUGACAACAACAGGGCUCUUACUCCCUCAGGCACUGCACCAGCCAGCAAAGCAUCA	#N/A	#N/A	#N/A	#N/A	#N/A
hsa-mir-3914-2	MI0016421	Chr7	71307674	71307768	+	GAGUUCCUACUCAACUUCUCAUUUUCUGGUUCCUUCUACCAAGUUAAGCAUACUCAUUAGAAGGAACCAGAAAAUGAGAAGUUAAAUCUGAAGUC	#N/A	#N/A	#N/A	#N/A	#N/A
hsa-mir-3914-1	MI0016419	Chr7	71307672	71307770	-	UGGACUUCAGAUUUAACUUCUCAUUUUCUGGUUCCUUCUAAUGAGUAUGCUUAACUUGGUAGAAGGAACCAGAAAAUGAGAAGUUGAGUAGGAACUCUA	#N/A	#N/A	#N/A	#N/A	#N/A
hsa-mir-489	MI0003124	Chr7	93483936	93484019	-	GUGGCAGCUUGGUGGUCGUAUGUGUGACGCCAUUUACUUGAACCUUUAGGAGUGACAUCACAUAUACGGCAGCUAAACUGCUAC	#N/A	#N/A	#N/A	#N/A	#N/A
hsa-mir-653	MI0003674	Chr7	93482760	93482855	-	UUCAUUCCUUCAGUGUUGAAACAAUCUCUACUGAACCAGCUUCAAACAAGUUCACUGGAGUUUGUUUCAAUAUUGCAAGAAUGAUAAGAUGGAAGC	#N/A	#N/A	#N/A	#N/A	#N/A
hsa-mir-5692a-1	MI0019297	Chr7	97963658	97963726	+	GACAGUACAAAUAAUACCACAGUGGGUGUACCUCAUGUGUGUACACCCUGUGAUAUUAUUUGUAAUAUC	#N/A	#N/A	#N/A	#N/A	#N/A
hsa-mir-5692c-2	MI0019289	Chr7	97964405	97964481	-	UGUGUACACCAACUGUGAUAUUAGGAGUCCUAUUUAUUUUUAGGAUAUUAGGAAUAAUAUCACAGUAGGUGUACACA	#N/A	#N/A	#N/A	#N/A	#N/A
hsa-mir-5090	MI0017979	Chr7	102465742	102465826	+	UCUGAGGUACCCGGGGCAGAUUGGUGUAGGGUGCAAAGCCUGCCCGCCCCCUAAGCCUUCUGCCCCCAACUCCAGCCUGUCAGGA	#N/A	#N/A	#N/A	#N/A	#N/A
hsa-mir-4467	MI0016818	Chr7	102471469	102471531	+	UGGUGGCGGCGGUAGUUAUGGGCUUCUCUUUCUCACCAGCAGCCCCUGGGCCGCCGCCUCCCU	#N/A	#N/A	#N/A	#N/A	#N/A
hsa-mir-29b-1	MI0000105	Chr7	130877459	130877539	-	CUUCAGGAAGCUGGUUUCAUAUGGUGGUUUAGAUUUAAAUAGUGAUUGUCUAGCACCAUUUGAAAUCAGUGUUCUUGGGGG	#N/A	#N/A	#N/A	#N/A	#N/A
hsa-mir-29a	MI0000087	Chr7	130876747	130876810	-	AUGACUGAUUUCUUUUGGUGUUCAGAGUCAAUAUAAUUUUCUAGCACCAUCUGAAAUCGGUUAU	#N/A	#N/A	#N/A	#N/A	#N/A
hsa-mir-4659a	MI0017287	Chr8	6745164	6745244	+	GAAACUGCUGAAGCUGCCAUGUCUAAGAAGAAAACUUUGGAGAAAAAUUUUCUUCUUAGACAUGGCAACGUCAACAGUUUC	#N/A	#N/A	#N/A	#N/A	#N/A
hsa-mir-4659b	MI0017291	Chr8	6745168	6745240	-	CUGUUGACGUUGCCAUGUCUAAGAAGAAAAUUUUUCUCCAAAGUUUUCUUCUUAGACAUGGCAGCUUCAGCAG	#N/A	#N/A	#N/A	#N/A	#N/A
hsa-mir-3622a	MI0016013	Chr8	27701677	27701759	+	AAUAGAGGGUGCACAGGCACGGGAGCUCAGGUGAGGCAGGGAGCUGAGCUCACCUGACCUCCCAUGCCUGUGCACCCUCUAUU	#N/A	#N/A	#N/A	#N/A	#N/A
hsa-mir-3622b	MI0016014	Chr8	27701673	27701767	-	AGUGAUAUAAUAGAGGGUGCACAGGCAUGGGAGGUCAGGUGAGCUCAGCUCCCUGCCUCACCUGAGCUCCCGUGCCUGUGCACCCUCUAUUGGCU	#N/A	#N/A	#N/A	#N/A	#N/A
hsa-mir-486-2	MI0023622	Chr8	41660444	41660507	+	UCCUGUACUGAGCUGCCCCGAGCUGGGCAGCAUGAAGGGCCUCGGGGCAGCUCAGUACAGGAUG	#N/A	#N/A	#N/A	#N/A	#N/A
hsa-mir-486-1	MI0002470	Chr8	41660441	41660508	-	GCAUCCUGUACUGAGCUGCCCCGAGGCCCUUCAUGCUGCCCAGCUCGGGGCAGCUCAGUACAGGAUAC	#N/A	#N/A	#N/A	#N/A	#N/A
hsa-mir-5681a	MI0019281	Chr8	74548543	74548617	+	AGUUUUUGAAGAGUAUUGCCACCCUUUCUAGUCCCUAUUAGACUAGAAAGGGUGGCAAUACCUCUUCCAAAAACU	#N/A	#N/A	#N/A	#N/A	#N/A
hsa-mir-5681b	MI0019293	Chr8	74548550	74548609	-	GAAGAGGUAUUGCCACCCUUUCUAGUCUAAUAGGGACUAGAAAGGGUGGCAAUACUCUUC	#N/A	#N/A	#N/A	#N/A	#N/A
hsa-mir-3150a	MI0014177	Chr8	95072914	95072993	+	GGGAAGCAGGCCAACCUCGACGAUCUCCUCAGCACCUGAACGCCAAGGCUGGGGAGAUCCUCGAGGUUGGCCUGCUUUCC	#N/A	#N/A	#N/A	#N/A	#N/A
hsa-mir-3150b	MI0016426	Chr8	95072911	95072996	-	GAGGGAAAGCAGGCCAACCUCGAGGAUCUCCCCAGCCUUGGCGUUCAGGUGCUGAGGAGAUCGUCGAGGUUGGCCUGCUUCCCCUC	#N/A	#N/A	#N/A	#N/A	#N/A
hsa-mir-875	MI0005541	Chr8	99536786	99536861	-	UUAGUGGUACUAUACCUCAGUUUUAUCAGGUGUUCUUAAAAUCACCUGGAAACACUGAGGUUGUGUCUCACUGAAC	#N/A	#N/A	#N/A	#N/A	#N/A
hsa-mir-599	MI0003611	Chr8	99536636	99536730	-	AAAGACAUGCUGUCCACAGUGUGUUUGAUAAGCUGACAUGGGACAGGGAUUCUUUUCACUGUUGUGUCAGUUUAUCAAACCCAUACUUGGAUGAC	#N/A	#N/A	#N/A	#N/A	#N/A
hsa-mir-548d-1	MI0003668	Chr8	123348034	123348130	-	AAACAAGUUAUAUUAGGUUGGUGCAAAAGUAAUUGUGGUUUUUGCCUGUAAAAGUAAUGGCAAAAACCACAGUUUCUUUUGCACCAGACUAAUAAAG	3.60325	-0.535995	9.67989	0.00186296	0.0220398
hsa-mir-548aa-1	MI0016689	Chr8	123348034	123348130	+	CUUUAUUAGUCUGGUGCAAAAGAAACUGUGGUUUUUGCCAUUACUUUUACAGGCAAAAACCACAAUUACUUUUGCACCAACCUAAUAUAACUUGUUU	#N/A	#N/A	#N/A	#N/A	#N/A
hsa-mir-4662a	MI0017290	Chr8	124821985	124822051	+	UCUAUUUAGCCAAUUGUCCAUCUUUAGCUAUUCUGAAUGCCUAAAGAUAGACAAUUGGCUAAAUAGA	#N/A	#N/A	#N/A	#N/A	#N/A
hsa-mir-4662b	MI0017293	Chr8	124821978	124822058	-	CACAAUUUCUAUUUAGCCAAUUGUCUAUCUUUAGGCAUUCAGAAUAGCUAAAGAUGGACAAUUGGCUAAAUAGACACUGUG	#N/A	#N/A	#N/A	#N/A	#N/A
hsa-mir-30d	MI0000255	Chr8	134804876	134804945	-	GUUGUUGUAAACAUCCCCGACUGGAAGCUGUAAGACACAGCUAAGCUUUCAGUCAGAUGUUUGCUGCUAC	#N/A	#N/A	#N/A	#N/A	#N/A
hsa-mir-30b	MI0000441	Chr8	134800520	134800607	-	ACCAAGUUUCAGUUCAUGUAAACAUCCUACACUCAGCUGUAAUACAUGGAUUGGCUGGGAGGUGGAUGUUUACUUCAGCUGACUUGGA	#N/A	#N/A	#N/A	#N/A	#N/A
hsa-mir-4477a	MI0016829	Chr9	41233755	41233835	+	UCCUCCUCCCAUCAAUCACAAAUGUCCUUAAUGGCAUUUAAGGAUUGCUAUUAAGGACAUUUGUGAUUCACGGGAGGAGGU	#N/A	#N/A	#N/A	#N/A	#N/A
hsa-mir-4477b	MI0016830	Chr9	41233755	41233835	+	ACCUCCUCCCGUGAAUCACAAAUGUCCUUAAUAGCAAUCCUUAAAUGCCAUUAAGGACAUUUGUGAUUGAUGGGAGGAGGA	#N/A	#N/A	#N/A	#N/A	#N/A
hsa-mir-4477a	MI0016829	Chr9	41233755	41233835	-	UCCUCCUCCCAUCAAUCACAAAUGUCCUUAAUGGCAUUUAAGGAUUGCUAUUAAGGACAUUUGUGAUUCACGGGAGGAGGU	#N/A	#N/A	#N/A	#N/A	#N/A
hsa-mir-4477b	MI0016830	Chr9	41233755	41233835	-	ACCUCCUCCCGUGAAUCACAAAUGUCCUUAAUAGCAAUCCUUAAAUGCCAUUAAGGACAUUUGUGAUUGAUGGGAGGAGGA	#N/A	#N/A	#N/A	#N/A	#N/A
hsa-mir-3910-1	MI0016414	Chr9	91636251	91636361	+	CUUUUGCUGUCAGUUUUUCUGUUGCUUGUCUUGGUUUUAUGCCUUUUAUAUCAAGGCACAUAAAAGGCAUAAAACCAAGACAAGCAACAAAAAAAGGAUUGAUCACAGAAG	#N/A	#N/A	#N/A	#N/A	#N/A
hsa-mir-3910-2	MI0016431	Chr9	91636264	91636345	-	UUUUUUUGUUGCUUGUCUUGGUUUUAUGCCUUUUAUGUGCCUUGAUAUAAAAGGCAUAAAACCAAGACAAGCAACAGAAAAA	#N/A	#N/A	#N/A	#N/A	#N/A
hsa-mir-181a-2	MI0000269	Chr9	124692442	124692551	+	AGAAGGGCUAUCAGGCCAGCCUUCAGAGGACUCCAAGGAACAUUCAACGCUGUCGGUGAGUUUGGGAUUUGAAAAAACCACUGACCGUUGACUGUACCUUGGGGUCCUUA	#N/A	#N/A	#N/A	#N/A	#N/A
hsa-mir-181b-2	MI0000683	Chr9	124693710	124693798	+	CUGAUGGCUGCACUCAACAUUCAUUGCUGUCGGUGGGUUUGAGUCUGAAUCAACUCACUGAUCAAUGAAUGCAAACUGCGGACCAAACA	#N/A	#N/A	#N/A	#N/A	#N/A
hsa-mir-3960	MI0016964	Chr9	127785833	127785923	+	GGCGCCCCGGCUCCCCGCGCCCCCGAUCGGGGCCGCCGCUAGUAGUGGCGGCGGCGGAGGCGGGGGCAGCGGCGGCGGCGGCGGAGGCGCC	#N/A	#N/A	#N/A	#N/A	#N/A
hsa-mir-2861	MI0013006	Chr9	127785918	127786007	+	GGCGCCUCUGCAGCUCCGGCUCCCCCUGGCCUCUCGGGAACUACAAGUCCCAGGGGGCCUGGCGGUGGGCGGCGGGCGGAAGAGGCGGGG	#N/A	#N/A	#N/A	#N/A	#N/A
hsa-mir-3154	MI0014182	Chr9	128244947	128245030	-	GGCCCCUCCUUCUCAGCCCCAGCUCCCGCUCACCCCUGCCACGUCAAAGGAGGCAGAAGGGGAGUUGGGAGCAGAGAGGGGACC	#N/A	#N/A	#N/A	#N/A	#N/A
hsa-mir-199b	MI0000282	Chr9	128244721	128244830	-	CCAGAGGACACCUCCACUCCGUCUACCCAGUGUUUAGACUAUCUGUUCAGGACUCCCAAAUUGUACAGUAGUCUGCACAUUGGUUAGGCUGGGCUGGGUUAGACCCUCGG	#N/A	#N/A	#N/A	#N/A	#N/A
hsa-mir-219b	MI0017299	Chr9	128392621	128392708	+	GGAGCUCAGCCACAGAUGUCCAGCCACAAUUCUCGGUUGGCCGCAGACUCGUACAAGAAUUGCGUUUGGACAAUCAGUGGCGAAGCCC	#N/A	#N/A	#N/A	#N/A	#N/A
hsa-mir-219a-2	MI0000740	Chr9	128392618	128392714	-	ACUCAGGGGCUUCGCCACUGAUUGUCCAAACGCAAUUCUUGUACGAGUCUGCGGCCAACCGAGAAUUGUGGCUGGACAUCUGUGGCUGAGCUCCGGG	#N/A	#N/A	#N/A	#N/A	#N/A
hsa-mir-222	MI0000299	ChrX	45747015	45747124	-	GCUGCUGGAAGGUGUAGGUACCCUCAAUGGCUCAGUAGCCAGUGUAGAUCCUGUCUUUCGUAAUCAGCAGCUACAUCUGGCUACUGGGUCUCUGAUGGCAUCUUCUAGCU	#N/A	#N/A	#N/A	#N/A	#N/A
hsa-mir-221	MI0000298	ChrX	45746157	45746266	-	UGAACAUCCAGGUCUGGGGCAUGAACCUGGCAUACAAUGUAGAUUUCUGUGUUCGUUAGGCAACAGCUACAUUGUCUGCUGGGUUUCAGGCUACCUGGAAACAUGUUCUC	#N/A	#N/A	#N/A	#N/A	#N/A
hsa-mir-6894	MI0022741	ChrX	53198889	53198945	-	CAAGAAGGAGGAUGGAGAGCUGGGCCAGACAUGCUCUUGCCUGCCCUCUUCCUCCAG	#N/A	#N/A	#N/A	#N/A	#N/A
hsa-mir-6895	MI0022742	ChrX	53195411	53195488	-	CAGCUCAGGGCCAGGCACAGAGUAAGCAUCAAUAGCAUUGGCAAGUUGAACUGAGCUGUCUCUCGCCCUUGGCCUUAG	#N/A	#N/A	#N/A	#N/A	#N/A
hsa-let-7f-2	MI0000068	ChrX	53557192	53557274	-	UGUGGGAUGAGGUAGUAGAUUGUAUAGUUUUAGGGUCAUACCCCAUCUUGGAGAUAACUAUACAGUCUACUGUCUUUCCCACG	#N/A	#N/A	#N/A	#N/A	#N/A
hsa-mir-98	MI0000100	ChrX	53556223	53556341	-	AGGAUUCUGCUCAUGCCAGGGUGAGGUAGUAAGUUGUAUUGUUGUGGGGUAGGGAUAUUAGGCCCCAAUUAGAAGAUAACUAUACAACUUACUACUUUCCCUGGUGUGUGGCAUAUUCA	#N/A	#N/A	#N/A	#N/A	#N/A
hsa-mir-4536-1	MI0016906	ChrX	55451495	55451582	-	AUGUGGUAGAUAUAUGCACGAUAUAUAUACUGCCCUGCUUUUAUACAUACAUACAUACAUACCUAUAUCGUGCAUAUAUCUACCACAU	#N/A	#N/A	#N/A	#N/A	#N/A
hsa-mir-4536-2	MI0019149	ChrX	55451495	55451582	+	AUGUGGUAGAUAUAUGCACGAUAUAGGUAUGUAUGUAUGUAUGUAUAAAAGCAGGGCAGUAUAUAUAUCGUGCAUAUAUCUACCACAU	#N/A	#N/A	#N/A	#N/A	#N/A
hsa-mir-374a	MI0000782	ChrX	74287286	74287357	-	UACAUCGGCCAUUAUAAUACAACCUGAUAAGUGUUAUAGCACUUAUCAGAUUGUAUUGUAAUUGUCUGUGUA	#N/A	#N/A	#N/A	#N/A	#N/A
hsa-mir-545	MI0003516	ChrX	74287104	74287209	-	CCCAGCCUGGCACAUUAGUAGGCCUCAGUAAAUGUUUAUUAGAUGAAUAAAUGAAUGACUCAUCAGCAAACAUUUAUUGUGUGCCUGCUAAAGUGAGCUCCACAGG	#N/A	#N/A	#N/A	#N/A	#N/A
hsa-mir-1912	MI0008333	ChrX	114651544	114651623	+	CUCUAGGAUGUGCUCAUUGCAUGGGCUGUGUAUAGUAUUAUUCAAUACCCAGAGCAUGCAGUGUGAACAUAAUAGAGAUU	#N/A	#N/A	#N/A	#N/A	#N/A
hsa-mir-1264	MI0003758	ChrX	114652655	114652723	+	AGGUCCUCAAUAAGUAUUUGUUGAAAGAAUAAAUAAACCAACAAGUCUUAUUUGAGCACCUGUUAUGUG	#N/A	#N/A	#N/A	#N/A	#N/A
hsa-mir-513b	MI0006648	ChrX	147199044	147199127	-	GUGUACAGUGCCUUUCACAAGGAGGUGUCAUUUAUGUGAACUAAAAUAUAAAUGUCACCUUUUUGAGAGGAGUAAUGUACAGCA	#N/A	#N/A	#N/A	#N/A	#N/A
hsa-mir-513c	MI0006649	ChrX	147189704	147189787	-	GCGUACAGUGCCUUUCUCAAGGAGGUGUCGUUUAUGUGAACUAAAAUAUAAAUUUCACCUUUCUGAGAAGAGUAAUGUACAGCA	#N/A	#N/A	#N/A	#N/A	#N/A
hsa-mir-452	MI0001733	ChrX	151959628	151959712	-	GCUAAGCACUUACAACUGUUUGCAGAGGAAACUGAGACUUUGUAACUAUGUCUCAGUCUCAUCUGCAAAGAAGUAAGUGCUUUGC	2.74574	8.11045	10.553	0.00115999	0.0154223
hsa-mir-224	MI0000301	ChrX	151958578	151958658	-	GGGCUUUCAAGUCACUAGUGGUUCCGUUUAGUAGAUGAUUGUGCAUUGUUUCAAAAUGGUGCCCUAGUGACUACAAAGCCC	4.28593	7.61867	14.8599	0.0001158	0.00278718
hsa-mir-3202-1	MI0014252	ChrX	153981097	153981177	+	UAUUAAUAUGGAAGGGAGAAGAGCUUUAAUGAUUGGAGUCAUUUUCAGAGCAUUAAAGCUCUUCUCCCUUCCAUAUUAAUG	#N/A	#N/A	#N/A	#N/A	#N/A
hsa-mir-3202-2	MI0014253	ChrX	153981098	153981176	-	AUUAAUAUGGAAGGGAGAAGAGCUUUAAUGCUCUGAAAAUGACUCCAAUCAUUAAAGCUCUUCUCCCUUCCAUAUUAAU	#N/A	#N/A	#N/A	#N/A	#N/A

## Sheet: CHOL
ID	Accession	Chromosome	Start	End	Strand	Sequence	logFC	logCPM	LR	PValue	FDR
hsa-mir-512-1	MI0003140	Chr19	53666679	53666762	+	UCUCAGUCUGUGGCACUCAGCCUUGAGGGCACUUUCUGGUGCCAGAAUGAAAGUGCUGUCAUAGCUGAGGUCCAAUGACUGAGG	#N/A	#N/A	#N/A	#N/A	#N/A
hsa-mir-512-2	MI0003141	Chr19	53669157	53669254	+	GGUACUUCUCAGUCUGUGGCACUCAGCCUUGAGGGCACUUUCUGGUGCCAGAAUGAAAGUGCUGUCAUAGCUGAGGUCCAAUGACUGAGGCGAGCACC	#N/A	#N/A	#N/A	#N/A	#N/A
hsa-mir-520d	MI0003164	Chr19	53720096	53720182	+	UCUCAAGCUGUGAGUCUACAAAGGGAAGCCCUUUCUGUUGUCUAAAAGAAAAGAAAGUGCUUCUCUUUGGUGGGUUACGGUUUGAGA	#N/A	#N/A	#N/A	#N/A	#N/A
hsa-mir-516b-2	MI0003167	Chr19	53725442	53725526	+	UCUCAUGAUGUGACCAUCUGGAGGUAAGAAGCACUUUGUGUUUUGUGAAAGAAAGUGCUUCCUUUCAGAGGGUUACUCUUUGAGA	#N/A	#N/A	#N/A	#N/A	#N/A
hsa-mir-526a-2	MI0003168	Chr19	53726922	53726986	+	GUGACCCUCUAGAGGGAAGCACUUUCUGUUGAAAGAAAAGAACAUGCAUCCUUUCAGAGGGUUAC	#N/A	#N/A	#N/A	#N/A	#N/A
hsa-mir-518a-1	MI0003170	Chr19	53731006	53731090	+	UCUCAAGCUGUGACUGCAAAGGGAAGCCCUUUCUGUUGUCUGAAAGAAGAGAAAGCGCUUCCCUUUGCUGGAUUACGGUUUGAGA	#N/A	#N/A	#N/A	#N/A	#N/A
hsa-mir-518d	MI0003171	Chr19	53734877	53734963	+	UCCCAUGCUGUGACCCUCUAGAGGGAAGCACUUUCUGUUGUCUGAAAGAAACCAAAGCGCUUCCCUUUGGAGCGUUACGGUUUGAGA	#N/A	#N/A	#N/A	#N/A	#N/A
hsa-mir-516b-1	MI0003172	Chr19	53736845	53736934	+	UCUCAGGCUGUGACCAUCUGGAGGUAAGAAGCACUUUCUGUUUUGUGAAAGAAAAGAAAGUGCUUCCUUUCAGAGGGUUACUCUUUGAGA	3.12512	-0.853726	7.66205	0.00563943	0.0391193
hsa-mir-518a-2	MI0003173	Chr19	53739333	53739419	+	UCUCAAGCUGUGGGUCUGCAAAGGGAAGCCCUUUCUGUUGUCUAAAAGAAGAGAAAGCGCUUCCCUUUGCUGGAUUACGGUUUGAGA	#N/A	#N/A	#N/A	#N/A	#N/A
hsa-mir-521-1	MI0003176	Chr19	53748636	53748722	+	UCUCAGGCUGUGACCCUCCAAAGGGAAGAACUUUCUGUUGUCUAAAAGAAAAGAACGCACUUCCCUUUAGAGUGUUACCGUGUGAGA	#N/A	#N/A	#N/A	#N/A	#N/A
hsa-mir-517a	MI0003161	Chr19	53712268	53712354	+	UCUCAGGCAGUGACCCUCUAGAUGGAAGCACUGUCUGUUGUAUAAAAGAAAAGAUCGUGCAUCCCUUUAGAGUGUUACUGUUUGAGA	3.97786	0.0445778	7.42503	0.00643227	0.043278
hsa-mir-517b	MI0003165	Chr19	53721076	53721142	+	GUGACCCUCUAGAUGGAAGCACUGUCUGUUGUCUAAGAAAAGAUCGUGCAUCCCUUUAGAGUGUUAC	3.97786	0.0445778	7.42503	0.00643227	0.043278
hsa-mir-526b	MI0003150	Chr19	53694393	53694475	+	UCAGGCUGUGACCCUCUUGAGGGAAGCACUUUCUGUUGUCUGAAAGAAGAGAAAGUGCUUCCUUUUAGAGGCUUACUGUCUGA	5.94871	0.678595	11.4451	0.000716826	0.00761481
hsa-mir-517c	MI0003174	Chr19	53741313	53741407	+	GAAGAUCUCAGGCAGUGACCCUCUAGAUGGAAGCACUGUCUGUUGUCUAAGAAAAGAUCGUGCAUCCUUUUAGAGUGUUACUGUUUGAGAAAAUC	#N/A	#N/A	#N/A	#N/A	#N/A
hsa-mir-524	MI0003160	Chr19	53711002	53711088	+	UCUCAUGCUGUGACCCUACAAAGGGAAGCACUUUCUCUUGUCCAAAGGAAAAGAAGGCGCUUCCCUUUGGAGUGUUACGGUUUGAGA	#N/A	#N/A	#N/A	#N/A	#N/A
hsa-mir-518e	MI0003169	Chr19	53729838	53729925	+	UCUCAGGCUGUGACCCUCUAGAGGGAAGCGCUUUCUGUUGGCUAAAAGAAAAGAAAGCGCUUCCCUUCAGAGUGUUAACGCUUUGAGA	#N/A	#N/A	#N/A	#N/A	#N/A
hsa-mir-519d	MI0003162	Chr19	53713347	53713434	+	UCCCAUGCUGUGACCCUCCAAAGGGAAGCGCUUUCUGUUUGUUUUCUCUUAAACAAAGUGCCUCCCUUUAGAGUGUUACCGUUUGGGA	3.2716	-0.807523	7.63226	0.00573335	0.0395235
hsa-mir-523	MI0003153	Chr19	53698385	53698471	+	UCUCAUGCUGUGACCCUCUAGAGGGAAGCGCUUUCUGUUGUCUGAAAGAAAAGAACGCGCUUCCCUAUAGAGGGUUACCCUUUGAGA	#N/A	#N/A	#N/A	#N/A	#N/A
hsa-mir-520f	MI0003146	Chr19	53682159	53682245	+	UCUCAGGCUGUGACCCUCUAAAGGGAAGCGCUUUCUGUGGUCAGAAAGAAAAGCAAGUGCUUCCUUUUAGAGGGUUACCGUUUGGGA	#N/A	#N/A	#N/A	#N/A	#N/A
hsa-mir-520a	MI0003149	Chr19	53690881	53690965	+	CUCAGGCUGUGACCCUCCAGAGGGAAGUACUUUCUGUUGUCUGAGAGAAAAGAAAGUGCUUCCCUUUGGACUGUUUCGGUUUGAG	#N/A	#N/A	#N/A	#N/A	#N/A
hsa-mir-518c	MI0003159	Chr19	53708735	53708835	+	GCGAGAAGAUCUCAUGCUGUGACUCUCUGGAGGGAAGCACUUUCUGUUGUCUGAAAGAAAACAAAGCGCUUCUCUUUAGAGUGUUACGGUUUGAGAAAAGC	4.35972	-0.347957	8.88078	0.00288188	0.0233432
hsa-mir-520c	MI0003158	Chr19	53707453	53707539	+	UCUCAGGCUGUCGUCCUCUAGAGGGAAGCACUUUCUGUUGUCUGAAAGAAAAGAAAGUGCUUCCUUUUAGAGGGUUACCGUUUGAGA	#N/A	#N/A	#N/A	#N/A	#N/A
hsa-mir-518f	MI0003154	Chr19	53700015	53700101	+	UCUCAUGCUGUGACCCUCUAGAGGGAAGCACUUUCUCUUGUCUAAAAGAAAAGAAAGCGCUUCUCUUUAGAGGAUUACUCUUUGAGA	#N/A	#N/A	#N/A	#N/A	#N/A
hsa-mir-518b	MI0003156	Chr19	53702737	53702819	+	UCAUGCUGUGGCCCUCCAGAGGGAAGCGCUUUCUGUUGUCUGAAAGAAAACAAAGCGCUCCCCUUUAGAGGUUUACGGUUUGA	3.87948	-0.573672	9.05795	0.00261555	0.0215908
hsa-mir-515-1	MI0003144	Chr19	53679003	53679085	+	UCUCAUGCAGUCAUUCUCCAAAAGAAAGCACUUUCUGUUGUCUGAAAGCAGAGUGCCUUCUUUUGGAGCGUUACUGUUUGAGA	#N/A	#N/A	#N/A	#N/A	#N/A
hsa-mir-515-2	MI0003147	Chr19	53685009	53685091	+	UCUCAUGCAGUCAUUCUCCAAAAGAAAGCACUUUCUGUUGUCUGAAAGCAGAGUGCCUUCUUUUGGAGCGUUACUGUUUGAGA	#N/A	#N/A	#N/A	#N/A	#N/A
hsa-mir-1323	MI0003786	Chr19	53671968	53672040	+	ACUGAGGUCCUCAAAACUGAGGGGCAUUUUCUGUGGUUUGAAAGGAAAGUGCACCCAGUUUUGGGGAUGUCAA	#N/A	#N/A	#N/A	#N/A	#N/A
hsa-mir-525	MI0003152	Chr19	53697533	53697617	+	CUCAAGCUGUGACUCUCCAGAGGGAUGCACUUUCUCUUAUGUGAAAAAAAAGAAGGCGCUUCCCUUUAGAGCGUUACGGUUUGGG	3.03436	-0.880594	7.37754	0.00660433	0.0438934
hsa-mir-519b	MI0003151	Chr19	53695213	53695293	+	CAUGCUGUGACCCUCUAGAGGGAAGCGCUUUCUGUUGUCUGAAAGAAAAGAAAGUGCAUCCUUUUAGAGGUUUACUGUUUG	#N/A	#N/A	#N/A	#N/A	#N/A
hsa-mir-522	MI0003177	Chr19	53751211	53751297	+	UCUCAGGCUGUGUCCCUCUAGAGGGAAGCGCUUUCUGUUGUCUGAAAGAAAAGAAAAUGGUUCCCUUUAGAGUGUUACGCUUUGAGA	#N/A	#N/A	#N/A	#N/A	#N/A
hsa-mir-519a-2	MI0003182	Chr19	53762344	53762430	+	UCUCAGGCUGUGUCCCUCUACAGGGAAGCGCUUUCUGUUGUCUGAAAGAAAGGAAAGUGCAUCCUUUUAGAGUGUUACUGUUUGAGA	3.11948	-0.857516	7.33422	0.0067654	0.0444832
hsa-mir-520b	MI0003155	Chr19	53701227	53701287	+	CCCUCUACAGGGAAGCGCUUUCUGUUGUCUGAAAGAAAAGAAAGUGCUUCCUUUUAGAGGG	#N/A	#N/A	#N/A	#N/A	#N/A
hsa-mir-519e	MI0003145	Chr19	53679940	53680023	+	UCUCAUGCAGUCAUUCUCCAAAAGGGAGCACUUUCUGUUUGAAAGAAAACAAAGUGCCUCCUUUUAGAGUGUUACUGUUUGAGA	#N/A	#N/A	#N/A	#N/A	#N/A
hsa-mir-519a-1	MI0003178	Chr19	53752397	53752481	+	CUCAGGCUGUGACACUCUAGAGGGAAGCGCUUUCUGUUGUCUGAAAGAAAGGAAAGUGCAUCCUUUUAGAGUGUUACUGUUUGAG	4.26555	-0.401345	10.1626	0.00143321	0.0136186
hsa-mir-521-2	MI0003163	Chr19	53716594	53716680	+	UCUCGGGCUGUGACUCUCCAAAGGGAAGAAUUUUCUCUUGUCUAAAAGAAAAGAACGCACUUCCCUUUAGAGUGUUACCGUGUGAGA	#N/A	#N/A	#N/A	#N/A	#N/A
hsa-mir-519c	MI0003148	Chr19	53686469	53686555	+	UCUCAGCCUGUGACCCUCUAGAGGGAAGCGCUUUCUGUUGUCUGAAAGAAAAGAAAGUGCAUCUUUUUAGAGGAUUACAGUUUGAGA	#N/A	#N/A	#N/A	#N/A	#N/A
hsa-mir-520g	MI0003166	Chr19	53722166	53722255	+	UCCCAUGCUGUGACCCUCUAGAGGAAGCACUUUCUGUUUGUUGUCUGAGAAAAAACAAAGUGCUUCCCUUUAGAGUGUUACCGUUUGGGA	#N/A	#N/A	#N/A	#N/A	#N/A
hsa-mir-520h	MI0003175	Chr19	53742512	53742599	+	UCCCAUGCUGUGACCCUCUAGAGGAAGCACUUUCUGUUUGUUGUCUGAGAAAAAACAAAGUGCUUCCCUUUAGAGUUACUGUUUGGGA	#N/A	#N/A	#N/A	#N/A	#N/A
hsa-mir-526a-1	MI0003157	Chr19	53706252	53706336	+	CUCAGGCUGUGACCCUCUAGAGGGAAGCACUUUCUGUUGCUUGAAAGAAGAGAAAGCGCUUCCUUUUAGAGGAUUACUCUUUGAG	#N/A	#N/A	#N/A	#N/A	#N/A
hsa-mir-527	MI0003179	Chr19	53754018	53754102	+	UCUCAAGCUGUGACUGCAAAGGGAAGCCCUUUCUGUUGUCUAAAAGAAAAGAAAGUGCUUCCCUUUGGUGAAUUACGGUUUGAGA	#N/A	#N/A	#N/A	#N/A	#N/A
hsa-mir-516a-1	MI0003180	Chr19	53756741	53756830	+	UCUCAGGCUGUGACCUUCUCGAGGAAAGAAGCACUUUCUGUUGUCUGAAAGAAAAGAAAGUGCUUCCUUUCAGAGGGUUACGGUUUGAGA	#N/A	#N/A	#N/A	#N/A	#N/A
hsa-mir-516a-2	MI0003181	Chr19	53761133	53761222	+	UCUCAGGUUGUGACCUUCUCGAGGAAAGAAGCACUUUCUGUUGUCUGAAAGAAAAGAAAGUGCUUCCUUUCAGAGGGUUACGGUUUGAGA	3.79519	-0.612911	9.22014	0.00239367	0.0205443
hsa-mir-520e	MI0003143	Chr19	53675711	53675797	+	UCUCCUGCUGUGACCCUCAAGAUGGAAGCAGUUUCUGUUGUCUGAAAGGAAAGAAAGUGCUUCCUUUUUGAGGGUUACUGUUUGAGA	#N/A	#N/A	#N/A	#N/A	#N/A
hsa-mir-498	MI0003142	Chr19	53674197	53674320	+	AACCCUCCUUGGGAAGUGAAGCUCAGGCUGUGAUUUCAAGCCAGGGGGCGUUUUUCUAUAACUGGAUGAAAAGCACCUCCAGAGCUUGAAGCUCACAGUUUGAGAGCAAUCGUCUAAGGAAGUU	#N/A	#N/A	#N/A	#N/A	#N/A
hsa-mir-1283-2	MI0006430	Chr19	53758232	53758318	+	CUCAAGCUGUGAGUCUACAAAGGAAAGCGCUUUCUGUUGUCUGAAAGAAAAGAAAUCGCUUCCCUUUGGAGUGUUACGGUUUGAGAA	#N/A	#N/A	#N/A	#N/A	#N/A
hsa-mir-1283-1	MI0003832	Chr19	53688481	53688567	+	CUCAAGCUAUGAGUCUACAAAGGAAAGCGCUUUCUGUUGUCAGAAAGAAGAGAAAGCGCUUCCCUUUUGAGGGUUACGGUUUGAGAA	#N/A	#N/A	#N/A	#N/A	#N/A
hsa-mir-379	MI0000787	Chr14	101022066	101022132	+	AGAGAUGGUAGACUAUGGAACGUAGGCGUUAUGAUUUCUGACCUAUGUAACAUGGUCCACUAACUCU	#N/A	#N/A	#N/A	#N/A	#N/A
hsa-mir-411	MI0003675	Chr14	101023325	101023420	+	UGGUACUUGGAGAGAUAGUAGACCGUAUAGCGUACGCUUUAUCUGUGACGUAUGUAACACGGUCCACUAACCCUCAGUAUCAAAUCCAUCCCCGAG	#N/A	#N/A	#N/A	#N/A	#N/A
hsa-mir-299	MI0000744	Chr14	101023794	101023856	+	AAGAAAUGGUUUACCGUCCCACAUACAUUUUGAAUAUGUAUGUGGGAUGGUAAACCGCUUCUU	#N/A	#N/A	#N/A	#N/A	#N/A
hsa-mir-380	MI0000788	Chr14	101025017	101025077	+	AAGAUGGUUGACCAUAGAACAUGCGCUAUCUCUGUGUCGUAUGUAAUAUGGUCCACAUCUU	#N/A	#N/A	#N/A	#N/A	#N/A
hsa-mir-1197	MI0006656	Chr14	101025564	101025651	+	ACUUCCUGGUAUUUGAAGAUGCGGUUGACCAUGGUGUGUACGCUUUAUUUGUGACGUAGGACACAUGGUCUACUUCUUCUCAAUAUCA	#N/A	#N/A	#N/A	#N/A	#N/A
hsa-mir-323a	MI0000807	Chr14	101025732	101025817	+	UUGGUACUUGGAGAGAGGUGGUCCGUGGCGCGUUCGCUUUAUUUAUGGCGCACAUUACACGGUCGACCUCUUUGCAGUAUCUAAUC	#N/A	#N/A	#N/A	#N/A	#N/A
hsa-mir-758	MI0003757	Chr14	101026020	101026107	+	GCCUGGAUACAUGAGAUGGUUGACCAGAGAGCACACGCUUUAUUUGUGCCGUUUGUGACCUGGUCCACUAACCCUCAGUAUCUAAUGC	#N/A	#N/A	#N/A	#N/A	#N/A
hsa-mir-329-1	MI0001725	Chr14	101026785	101026864	+	GGUACCUGAAGAGAGGUUUUCUGGGUUUCUGUUUCUUUAAUGAGGACGAAACACACCUGGUUAACCUCUUUUCCAGUAUC	#N/A	#N/A	#N/A	#N/A	#N/A
hsa-mir-329-2	MI0001726	Chr14	101027100	101027183	+	GUGGUACCUGAAGAGAGGUUUUCUGGGUUUCUGUUUCUUUAUUGAGGACGAAACACACCUGGUUAACCUCUUUUCCAGUAUCAA	#N/A	#N/A	#N/A	#N/A	#N/A
hsa-mir-494	MI0003134	Chr14	101029634	101029714	+	GAUACUCGAAGGAGAGGUUGUCCGUGUUGUCUUCUCUUUAUUUAUGAUGAAACAUACACGGGAAACCUCUUUUUUAGUAUC	#N/A	#N/A	#N/A	#N/A	#N/A
hsa-mir-1193	MI0014205	Chr14	101030052	101030129	+	GUAGCUGAGGGGAUGGUAGACCGGUGACGUGCACUUCAUUUACGAUGUAGGUCACCCGUUUGACUAUCCACCAGCGCC	#N/A	#N/A	#N/A	#N/A	#N/A
hsa-mir-543	MI0005565	Chr14	101031987	101032064	+	UACUUAAUGAGAAGUUGCCCGUGUUUUUUUCGCUUUAUUUGUGACGAAACAUUCGCGGUGCACUUCUUUUUCAGUAUC	#N/A	#N/A	#N/A	#N/A	#N/A
hsa-mir-495	MI0003135	Chr14	101033755	101033836	+	UGGUACCUGAAAAGAAGUUGCCCAUGUUAUUUUCGCUUUAUAUGUGACGAAACAAACAUGGUGCACUUCUUUUUCGGUAUCA	#N/A	#N/A	#N/A	#N/A	#N/A
hsa-mir-376c	MI0000776	Chr14	101039690	101039755	+	AAAAGGUGGAUAUUCCUUCUAUGUUUAUGUUAUUUAUGGUUAAACAUAGAGGAAAUUCCACGUUUU	#N/A	#N/A	#N/A	#N/A	#N/A
hsa-mir-376a-2	MI0003529	Chr14	101040069	101040148	+	GGUAUUUAAAAGGUAGAUUUUCCUUCUAUGGUUACGUGUUUGAUGGUUAAUCAUAGAGGAAAAUCCACGUUUUCAGUAUC	#N/A	#N/A	#N/A	#N/A	#N/A
hsa-mir-654	MI0003676	Chr14	101040219	101040299	+	GGGUAAGUGGAAAGAUGGUGGGCCGCAGAACAUGUGCUGAGUUCGUGCCAUAUGUCUGCUGACCAUCACCUUUAGAAGCCC	#N/A	#N/A	#N/A	#N/A	#N/A
hsa-mir-376b	MI0002466	Chr14	101040436	101040535	+	CAGUCCUUCUUUGGUAUUUAAAACGUGGAUAUUCCUUCUAUGUUUACGUGAUUCCUGGUUAAUCAUAGAGGAAAAUCCAUGUUUUCAGUAUCAAAUGCUG	#N/A	#N/A	#N/A	#N/A	#N/A
hsa-mir-376a-1	MI0000784	Chr14	101040782	101040849	+	UAAAAGGUAGAUUCUCCUUCUAUGAGUACAUUAUUUAUGAUUAAUCAUAGAGGAAAAUCCACGUUUUC	#N/A	#N/A	#N/A	#N/A	#N/A
hsa-mir-300	MI0005525	Chr14	101041363	101041445	+	UGCUACUUGAAGAGAGGUAAUCCUUCACGCAUUUGCUUUACUUGCAAUGAUUAUACAAGGGCAGACUCUCUCUGGGGAGCAAA	#N/A	#N/A	#N/A	#N/A	#N/A
hsa-mir-1185-1	MI0003844	Chr14	101042977	101043062	+	UUUGGUACUUGAAGAGAGGAUACCCUUUGUAUGUUCACUUGAUUAAUGGCGAAUAUACAGGGGGAGACUCUUAUUUGCGUAUCAAA	#N/A	#N/A	#N/A	#N/A	#N/A
hsa-mir-1185-2	MI0003821	Chr14	101044198	101044283	+	UUUGGUACUUAAAGAGAGGAUACCCUUUGUAUGUUCACUUGAUUAAUGGCGAAUAUACAGGGGGAGACUCUCAUUUGCGUAUCAAA	#N/A	#N/A	#N/A	#N/A	#N/A
hsa-mir-381	MI0000789	Chr14	101045920	101045994	+	UACUUAAAGCGAGGUUGCCCUUUGUAUAUUCGGUUUAUUGACAUGGAAUAUACAAGGGCAAGCUCUCUGUGAGUA	#N/A	#N/A	#N/A	#N/A	#N/A
hsa-mir-487b	MI0003530	Chr14	101046455	101046538	+	UUGGUACUUGGAGAGUGGUUAUCCCUGUCCUGUUCGUUUUGCUCAUGUCGAAUCGUACAGGGUCAUCCACUUUUUCAGUAUCAA	#N/A	#N/A	#N/A	#N/A	#N/A
hsa-mir-539	MI0003514	Chr14	101047321	101047398	+	AUACUUGAGGAGAAAUUAUCCUUGGUGUGUUCGCUUUAUUUAUGAUGAAUCAUACAAGGACAAUUUCUUUUUGAGUAU	#N/A	#N/A	#N/A	#N/A	#N/A
hsa-mir-889	MI0005540	Chr14	101047901	101047979	+	GUGCUUAAAGAAUGGCUGUCCGUAGUAUGGUCUCUAUAUUUAUGAUGAUUAAUAUCGGACAACCAUUGUUUUAGUAUCC	#N/A	#N/A	#N/A	#N/A	#N/A
hsa-mir-544a	MI0003515	Chr14	101048658	101048748	+	AUUUUCAUCACCUAGGGAUCUUGUUAAAAAGCAGAUUCUGAUUCAGGGACCAAGAUUCUGCAUUUUUAGCAAGUUCUCAAGUGAUGCUAAU	#N/A	#N/A	#N/A	#N/A	#N/A
hsa-mir-655	MI0003677	Chr14	101049550	101049646	+	AACUAUGCAAGGAUAUUUGAGGAGAGGUUAUCCGUGUUAUGUUCGCUUCAUUCAUCAUGAAUAAUACAUGGUUAACCUCUUUUUGAAUAUCAGACUC	#N/A	#N/A	#N/A	#N/A	#N/A
hsa-mir-487a	MI0002471	Chr14	101052446	101052525	+	GGUACUUGAAGAGUGGUUAUCCCUGCUGUGUUCGCUUAAUUUAUGACGAAUCAUACAGGGACAUCCAGUUUUUCAGUAUC	#N/A	#N/A	#N/A	#N/A	#N/A
hsa-mir-382	MI0000790	Chr14	101054306	101054381	+	UACUUGAAGAGAAGUUGUUCGUGGUGGAUUCGCUUUACUUAUGACGAAUCAUUCACGGACAACACUUUUUUCAGUA	#N/A	#N/A	#N/A	#N/A	#N/A
hsa-mir-134	MI0000474	Chr14	101054687	101054759	+	CAGGGUGUGUGACUGGUUGACCAGAGGGGCAUGCACUGUGUUCACCCUGUGGGCCACCUAGUCACCAACCCUC	#N/A	#N/A	#N/A	#N/A	#N/A
hsa-mir-668	MI0003761	Chr14	101055258	101055323	+	GGUAAGUGCGCCUCGGGUGAGCAUGCACUUAAUGUGGGUGUAUGUCACUCGGCUCGGCCCACUACC	#N/A	#N/A	#N/A	#N/A	#N/A
hsa-mir-485	MI0002469	Chr14	101055419	101055491	+	ACUUGGAGAGAGGCUGGCCGUGAUGAAUUCGAUUCAUCAAAGCGAGUCAUACACGGCUCUCCUCUCUUUUAGU	#N/A	#N/A	#N/A	#N/A	#N/A
hsa-mir-323b	MI0014206	Chr14	101056219	101056300	+	UGGUACUCGGAGGGAGGUUGUCCGUGGUGAGUUCGCAUUAUUUAAUGAUGCCCAAUACACGGUCGACCUCUUUUCGGUAUCA	#N/A	#N/A	#N/A	#N/A	#N/A
hsa-mir-154	MI0000480	Chr14	101059755	101059838	+	GUGGUACUUGAAGAUAGGUUAUCCGUGUUGCCUUCGCUUUAUUUGUGACGAAUCAUACACGGUUGACCUAUUUUUCAGUACCAA	#N/A	#N/A	#N/A	#N/A	#N/A
hsa-mir-496	MI0003136	Chr14	101060573	101060674	+	CCCAAGUCAGGUACUCGAAUGGAGGUUGUCCAUGGUGUGUUCAUUUUAUUUAUGAUGAGUAUUACAUGGCCAAUCUCCUUUCGGUACUCAAUUCUUCUUGGG	#N/A	#N/A	#N/A	#N/A	#N/A
hsa-mir-377	MI0000785	Chr14	101062050	101062118	+	UUGAGCAGAGGUUGCCCUUGGUGAAUUCGCUUUAUUUAUGUUGAAUCACACAAAGGCAACUUUUGUUUG	#N/A	#N/A	#N/A	#N/A	#N/A
hsa-mir-541	MI0005539	Chr14	101064495	101064578	+	ACGUCAGGGAAAGGAUUCUGCUGUCGGUCCCACUCCAAAGUUCACAGAAUGGGUGGUGGGCACAGAAUCUGGACUCUGCUUGUG	#N/A	#N/A	#N/A	#N/A	#N/A
hsa-mir-409	MI0001735	Chr14	101065300	101065378	+	UGGUACUCGGGGAGAGGUUACCCGAGCAACUUUGCAUCUGGACGACGAAUGUUGCUCGGUGAACCCCUUUUCGGUAUCA	#N/A	#N/A	#N/A	#N/A	#N/A
hsa-mir-412	MI0002464	Chr14	101065447	101065537	+	CUGGGGUACGGGGAUGGAUGGUCGACCAGUUGGAAAGUAAUUGUUUCUAAUGUACUUCACCUGGUCCACUAGCCGUCCGUAUCCGCUGCAG	#N/A	#N/A	#N/A	#N/A	#N/A
hsa-mir-369	MI0000777	Chr14	101065598	101065667	+	UUGAAGGGAGAUCGACCGUGUUAUAUUCGCUUUAUUGACUUCGAAUAAUACAUGGUUGAUCUUUUCUCAG	#N/A	#N/A	#N/A	#N/A	#N/A
hsa-mir-410	MI0002465	Chr14	101065912	101065991	+	GGUACCUGAGAAGAGGUUGUCUGUGAUGAGUUCGCUUUUAUUAAUGACGAAUAUAACACAGAUGGCCUGUUUUCAGUACC	#N/A	#N/A	#N/A	#N/A	#N/A
hsa-mir-656	MI0003678	Chr14	101066724	101066801	+	CUGAAAUAGGUUGCCUGUGAGGUGUUCACUUUCUAUAUGAUGAAUAUUAUACAGUCAACCUCUUUCCGAUAUCGAAUC	#N/A	#N/A	#N/A	#N/A	#N/A
hsa-mir-493	MI0003132	Chr14	100869060	100869148	+	CUGGCCUCCAGGGCUUUGUACAUGGUAGGCUUUCAUUCAUUCGUUUGCACAUUCGGUGAAGGUCUACUGUGUGCCAGGCCCUGUGCCAG	#N/A	#N/A	#N/A	#N/A	#N/A
hsa-mir-337	MI0000806	Chr14	100874493	100874585	+	GUAGUCAGUAGUUGGGGGGUGGGAACGGCUUCAUACAGGAGUUGAUGCACAGUUAUCCAGCUCCUAUAUGAUGCCUUUCUUCAUCCCCUUCAA	#N/A	#N/A	#N/A	#N/A	#N/A
hsa-mir-665	MI0005563	Chr14	100875033	100875104	+	UCUCCUCGAGGGGUCUCUGCCUCUACCCAGGACUCUUUCAUGACCAGGAGGCUGAGGCCCCUCACAGGCGGC	#N/A	#N/A	#N/A	#N/A	#N/A
hsa-mir-431	MI0001721	Chr14	100881007	100881120	+	UCCUGCUUGUCCUGCGAGGUGUCUUGCAGGCCGUCAUGCAGGCCACACUGACGGUAACGUUGCAGGUCGUCUUGCAGGGCUUCUCGCAAGACGACAUCCUCAUCACCAACGACG	#N/A	#N/A	#N/A	#N/A	#N/A
hsa-mir-433	MI0001723	Chr14	100881886	100881978	+	CCGGGGAGAAGUACGGUGAGCCUGUCAUUAUUCAGAGAGGCUAGAUCCUCUGUGUUGAGAAGGAUCAUGAUGGGCUCCUCGGUGUUCUCCAGG	#N/A	#N/A	#N/A	#N/A	#N/A
hsa-mir-127	MI0000472	Chr14	100882979	100883075	+	UGUGAUCACUGUCUCCAGCCUGCUGAAGCUCAGAGGGCUCUGAUUCAGAAAGAUCAUCGGAUCCGUCUGAGCUUGGCUGGUCGGAAGUCUCAUCAUC	#N/A	#N/A	#N/A	#N/A	#N/A
hsa-mir-432	MI0003133	Chr14	100884483	100884576	+	UGACUCCUCCAGGUCUUGGAGUAGGUCAUUGGGUGGAUCCUCUAUUUCCUUACGUGGGCCACUGGAUGGCUCCUCCAUGUCUUGGAGUAGAUCA	#N/A	#N/A	#N/A	#N/A	#N/A
hsa-mir-136	MI0000475	Chr14	100884702	100884783	+	UGAGCCCUCGGAGGACUCCAUUUGUUUUGAUGAUGGAUUCUUAUGCUCCAUCAUCGUCUCAAAUGAGUCUUCAGAGGGUUCU	#N/A	#N/A	#N/A	#N/A	#N/A
hsa-mir-532	MI0003205	ChrX	50003148	50003238	+	CGACUUGCUUUCUCUCCUCCAUGCCUUGAGUGUAGGACCGUUGGCAUCUUAAUUACCCUCCCACACCCAAGGCUUGCAGAAGAGCGAGCCU	#N/A	#N/A	#N/A	#N/A	#N/A
hsa-mir-188	MI0000484	ChrX	50003503	50003588	+	UGCUCCCUCUCUCACAUCCCUUGCAUGGUGGAGGGUGAGCUUUCUGAAAACCCCUCCCACAUGCAGGGUUUGCAGGAUGGCGAGCC	#N/A	#N/A	#N/A	#N/A	#N/A
hsa-mir-500a	MI0003184	ChrX	50008431	50008514	+	GCUCCCCCUCUCUAAUCCUUGCUACCUGGGUGAGAGUGCUGUCUGAAUGCAAUGCACCUGGGCAAGGAUUCUGAGAGCGAGAGC	#N/A	#N/A	#N/A	#N/A	#N/A
hsa-mir-362	MI0000762	ChrX	50008964	50009028	+	CUUGAAUCCUUGGAACCUAGGUGUGAGUGCUAUUUCAGUGCAACACACCUAUUCAAGGAUUCAAA	#N/A	#N/A	#N/A	#N/A	#N/A
hsa-mir-501	MI0003185	ChrX	50009722	50009805	+	GCUCUUCCUCUCUAAUCCUUUGUCCCUGGGUGAGAGUGCUUUCUGAAUGCAAUGCACCCGGGCAAGGAUUCUGAGAGGGUGAGC	#N/A	#N/A	#N/A	#N/A	#N/A
hsa-mir-500b	MI0015903	ChrX	50010672	50010750	+	CCCCCUCUCUAAUCCUUGCUACCUGGGUGAGAGUGCUUUCUGAAUGCAGUGCACCCAGGCAAGGAUUCUGCAAGGGGGA	#N/A	#N/A	#N/A	#N/A	#N/A
hsa-mir-660	MI0003684	ChrX	50013241	50013337	+	CUGCUCCUUCUCCCAUACCCAUUGCAUAUCGGAGUUGUGAAUUCUCAAAACACCUCCUGUGUGCAUGGAUUACAGGAGGGUGAGCCUUGUCAUCGUG	#N/A	#N/A	#N/A	#N/A	#N/A
hsa-mir-502	MI0003186	ChrX	50014598	50014683	+	UGCUCCCCCUCUCUAAUCCUUGCUAUCUGGGUGCUAGUGCUGGCUCAAUGCAAUGCACCUGGGCAAGGAUUCAGAGAGGGGGAGCU	#N/A	#N/A	#N/A	#N/A	#N/A
hsa-mir-3689f	MI0016837	Chr9	134850742	134850807	-	AGGUGUGAUAUCGUGCUUCCUGGGACGUGUGAUGCUGUGCUUCCUGGGAGGUGUGAUCCCACACUC	#N/A	#N/A	#N/A	#N/A	#N/A
hsa-mir-3689e	MI0016836	Chr9	134850570	134850641	-	GGGAGGUGUGAUAUCAUGGUUCCUGGGAGGUAUGAUAUCGUGGUUCCUGGGAGGUGUGAUCCCGUGCUCCCU	#N/A	#N/A	#N/A	#N/A	#N/A
hsa-mir-3689d-2	MI0016835	Chr9	134850277	134850356	-	ACUGGGAGGUGUGAUCUCACACUCGCUGGGAGGUGUGCUAUCGUCUUCCCUGGGAGGUGUGAUCCUGUUCUUCCUGAGCG	#N/A	#N/A	#N/A	#N/A	#N/A
hsa-mir-3689b	MI0016411	Chr9	134850125	134850272	-	GAUCCUGUGCUCCCUGGGGGGUCUGAUCCUGUGCUUCCUGGGAGGUGUGAUAUCAUGGUUCCUGGGAGGUGUGAUCCCGUGCUUCCUGGGAGGUGUGAUAUUGUGGUUCCUGGGAGGUGUGAUCCCGUGCUCCCUGGGAGGUGUGAUC	#N/A	#N/A	#N/A	#N/A	#N/A
hsa-mir-3689d-1	MI0016834	Chr9	134849609	134849682	-	UGGGAGGUGUGAUCUCACACUCGCUGGGAGGUGUGCUAUCGUCUUCCCCGGGAGGUGUGAUCCUGUUCUUCCUG	#N/A	#N/A	#N/A	#N/A	#N/A
hsa-mir-3689a	MI0016090	Chr9	134849487	134849564	-	CCUGGGAGGUGUGAUAUCAUGGUUCCUGGGAGGUGUGAUCCUGUGCUUCCUGGGAGGUGUGAUAUCGUGGUUCCUGGG	#N/A	#N/A	#N/A	#N/A	#N/A
hsa-mir-3689c	MI0016832	Chr9	134849298	134849369	-	GGGAGGUGUGAUAUCGUGGUUCCUGGGAGGUGUGAUAUCGUGGUUCCUGGGAGGUGUGAUAUUGUGGUUCCU	#N/A	#N/A	#N/A	#N/A	#N/A
hsa-mir-17	MI0000071	Chr13	91350605	91350688	+	GUCAGAAUAAUGUCAAAGUGCUUACAGUGCAGGUAGUGAUAUGUGCAUCUACUGCAGUGAAGGCACUUGUAGCAUUAUGGUGAC	#N/A	#N/A	#N/A	#N/A	#N/A
hsa-mir-18a	MI0000072	Chr13	91350751	91350821	+	UGUUCUAAGGUGCAUCUAGUGCAGAUAGUGAAGUAGAUUAGCAUCUACUGCCCUAAGUGCUCCUUCUGGCA	#N/A	#N/A	#N/A	#N/A	#N/A
hsa-mir-19a	MI0000073	Chr13	91350891	91350972	+	GCAGUCCUCUGUUAGUUUUGCAUAGUUGCACUACAAGAAGAAUGUAGUUGUGCAAAUCUAUGCAAAACUGAUGGUGGCCUGC	#N/A	#N/A	#N/A	#N/A	#N/A
hsa-mir-20a	MI0000076	Chr13	91351065	91351135	+	GUAGCACUAAAGUGCUUAUAGUGCAGGUAGUGUUUAGUUAUCUACUGCAUUAUGAGCACUUAAAGUACUGC	#N/A	#N/A	#N/A	#N/A	#N/A
hsa-mir-19b-1	MI0000074	Chr13	91351192	91351278	+	CACUGUUCUAUGGUUAGUUUUGCAGGUUUGCAUCCAGCUGUGUGAUAUUCUGCUGUGCAAAUCCAUGCAAAACUGACUGUGGUAGUG	#N/A	#N/A	#N/A	#N/A	#N/A
hsa-mir-92a-1	MI0000093	Chr13	91351314	91351391	+	CUUUCUACACAGGUUGGGAUCGGUUGCAAUGCUGUGUUUCUGUAUGGUAUUGCACUUGUCCCGGCCUGUUGAGUUUGG	#N/A	#N/A	#N/A	#N/A	#N/A
hsa-mir-106a	MI0000113	ChrX	134170198	134170278	-	CCUUGGCCAUGUAAAAGUGCUUACAGUGCAGGUAGCUUUUUGAGAUCUACUGCAAUGUAAGCACUUCUUACAUUACCAUGG	#N/A	#N/A	#N/A	#N/A	#N/A
hsa-mir-18b	MI0001518	ChrX	134170041	134170111	-	UGUGUUAAGGUGCAUCUAGUGCAGUUAGUGAAGCAGCUUAGAAUCUACUGCCCUAAAUGCCCCUUCUGGCA	#N/A	#N/A	#N/A	#N/A	#N/A
hsa-mir-20b	MI0001519	ChrX	134169809	134169877	-	AGUACCAAAGUGCUCAUAGUGCAGGUAGUUUUGGCAUGACUCUACUGUAGUAUGGGCACUUCCAGUACU	#N/A	#N/A	#N/A	#N/A	#N/A
hsa-mir-19b-2	MI0000075	ChrX	134169671	134169766	-	ACAUUGCUACUUACAAUUAGUUUUGCAGGUUUGCAUUUCAGCGUAUAUAUGUAUAUGUGGCUGUGCAAAUCCAUGCAAAACUGAUUGUGAUAAUGU	#N/A	#N/A	#N/A	#N/A	#N/A
hsa-mir-92a-2	MI0000094	ChrX	134169538	134169612	-	UCAUCCCUGGGUGGGGAUUUGUUGCAUUACUUGUGUUCUAUAUAAAGUAUUGCACUUGUCCCGGCCUGUGGAAGA	#N/A	#N/A	#N/A	#N/A	#N/A
hsa-mir-363	MI0000764	ChrX	134169378	134169452	-	UGUUGUCGGGUGGAUCACGAUGCAAUUUUGAUGAGUAUCAUAGGAGAAAAAUUGCACGGUAUCCAUCUGUAAACC	#N/A	#N/A	#N/A	#N/A	#N/A
hsa-mir-424	MI0001446	ChrX	134546614	134546711	-	CGAGGGGAUACAGCAGCAAUUCAUGUUUUGAAGUGUUCUAAAUGGUUCAAAACGUGAGGCGCUGCUAUACCCCCUCGUGGGGAAGGUAGAAGGUGGGG	-1.75792	7.55686	36.9476	1.2135e-09	4.62557e-08
hsa-mir-503	MI0003188	ChrX	134546328	134546398	-	UGCCCUAGCAGCGGGAACAGUUCUGCAGUGAGCGAUCGGUGCUCUGGGGUAUUGUUUCCGCUGCCAGGGUA	#N/A	#N/A	#N/A	#N/A	#N/A
hsa-mir-542	MI0003686	ChrX	134541341	134541437	-	CAGAUCUCAGACAUCUCGGGGAUCAUCAUGUCACGAGAUACCAGUGUGCACUUGUGACAGAUUGAUAACUGAAAGGUCUGGGAGCCACUCAUCUUCA	-1.12873	8.18729	18.6624	1.56031e-05	0.000273265
hsa-mir-450a-2	MI0003187	ChrX	134540508	134540607	-	CCAAAGAAAGAUGCUAAACUAUUUUUGCGAUGUGUUCCUAAUAUGUAAUAUAAAUGUAUUGGGGACAUUUUGCAUUCAUAGUUUUGUAUCAAUAAUAUGG	#N/A	#N/A	#N/A	#N/A	#N/A
hsa-mir-450a-1	MI0001652	ChrX	134540341	134540431	-	AAACGAUACUAAACUGUUUUUGCGAUGUGUUCCUAAUAUGCACUAUAAAUAUAUUGGGAACAUUUUGCAUGUAUAGUUUUGUAUCAAUAUA	#N/A	#N/A	#N/A	#N/A	#N/A
hsa-mir-450b	MI0005531	ChrX	134540185	134540262	-	GCAGAAUUAUUUUUGCAAUAUGUUCCUGAAUAUGUAAUAUAAGUGUAUUGGGAUCAUUUUGCAUCCAUAGUUUUGUAU	#N/A	#N/A	#N/A	#N/A	#N/A
hsa-mir-891b	MI0005534	ChrX	146001053	146001131	-	CCUUAAUCCUUGCAACUUACCUGAGUCAUUGAUUCAGUAAAACAUUCAAUGGCACAUGUUUGUUGUUAGGGUCAAAAGA	#N/A	#N/A	#N/A	#N/A	#N/A
hsa-mir-892b	MI0005538	ChrX	145997198	145997274	-	UGCAAUGCCCUACUCAGAAAGGUGCCAUUUAUGUAGAUUUUAUGUCACUGGCUCCUUUCUGGGUAGAGCAAGGCUCA	#N/A	#N/A	#N/A	#N/A	#N/A
hsa-mir-892a	MI0005528	ChrX	145996669	145996743	-	GCAGUGCCUUACUCAGAAAGGUGCCAGUCACUUACACUACAUGUCACUGUGUCCUUUCUGCGUAGAGUAAGGCUC	#N/A	#N/A	#N/A	#N/A	#N/A
hsa-mir-888	MI0005537	ChrX	145994784	145994860	-	GGCAGUGCUCUACUCAAAAAGCUGUCAGUCACUUAGAUUACAUGUGACUGACACCUCUUUGGGUGAAGGAAGGCUCA	#N/A	#N/A	#N/A	#N/A	#N/A
hsa-mir-890	MI0005533	ChrX	145994275	145994351	-	GGAAGUGCCCUACUUGGAAAGGCAUCAGUUGCUUAGAUUACAUGUAACUAUUCCCUUUCUGAGUAGAGUAAGUCUUA	#N/A	#N/A	#N/A	#N/A	#N/A
hsa-mir-892c	MI0022560	ChrX	145992750	145992826	-	GGCAGUGCCCUAUUCAGAAAGGUGCCAGUCACUUAGAUUACAUGUCACUGUUUCCUUUCUGAGUGGAGUAGGGCUUA	#N/A	#N/A	#N/A	#N/A	#N/A
hsa-mir-941-1	MI0005763	Chr20	63919449	63919520	+	UGUGGACAUGUGCCCAGGGCCCGGGACAGCGCCACGGAAGAGGACGCACCCGGCUGUGUGCACAUGUGCCCA	#N/A	#N/A	#N/A	#N/A	#N/A
hsa-mir-941-2	MI0005764	Chr20	63919505	63919576	+	UGUGCACAUGUGCCCAGGGCCCGGGACAGCGCCACGGAAGAGGACGCACCCGGCUGUGUGCACAUGUGCCCA	#N/A	#N/A	#N/A	#N/A	#N/A
hsa-mir-941-3	MI0005765	Chr20	63919561	63919632	+	UGUGCACAUGUGCCCAGGGCCCGGGACAGCGCCACGGAAGAGGACGCACCCGGCUGUGUGCACAUGUGCCCA	#N/A	#N/A	#N/A	#N/A	#N/A
hsa-mir-941-4	MI0005766	Chr20	63919756	63919827	+	UGUGCACAUGUGCCCAGGGCCCGGGACAGCGCCACGGAAGAGGACGCACCCGGCUGUGUGCACAUGUGCCCA	#N/A	#N/A	#N/A	#N/A	#N/A
hsa-mir-941-5	MI0031520	Chr20	63919868	63919939	+	UGUGCACAUGUGCCCAGGGCCCGGGACAGCGCCACGGAAGAGGACGCACCCGGCUGUGUGCACAUGUGCCCA	#N/A	#N/A	#N/A	#N/A	#N/A
hsa-mir-302b	MI0000772	Chr4	112648485	112648557	-	GCUCCCUUCAACUUUAACAUGGAAGUGCUUUCUGUGACUUUAAAAGUAAGUGCUUCCAUGUUUUAGUAGGAGU	#N/A	#N/A	#N/A	#N/A	#N/A
hsa-mir-302c	MI0000773	Chr4	112648363	112648430	-	CCUUUGCUUUAACAUGGGGGUACCUGCUGUGUGAAACAAAAGUAAGUGCUUCCAUGUUUCAGUGGAGG	#N/A	#N/A	#N/A	#N/A	#N/A
hsa-mir-302a	MI0000738	Chr4	112648183	112648251	-	CCACCACUUAAACGUGGAUGUACUUGCUUUGAAACUAAAGAAGUAAGUGCUUCCAUGUUUUGGUGAUGG	#N/A	#N/A	#N/A	#N/A	#N/A
hsa-mir-302d	MI0000774	Chr4	112648004	112648071	-	CCUCUACUUUAACAUGGAGGCACUUGCUGUGACAUGACAAAAAUAAGUGCUUCCAUGUUUGAGUGUGG	#N/A	#N/A	#N/A	#N/A	#N/A
hsa-mir-367	MI0000775	Chr4	112647874	112647941	-	CCAUUACUGUUGCUAAUAUGCAACUCUGUUGAAUAUAAAUUGGAAUUGCACUUUAGCAAUGGUGAUGG	#N/A	#N/A	#N/A	#N/A	#N/A
hsa-mir-6749	MI0022594	Chr11	64902387	64902455	-	GGCCCUCGGGCCUGGGGUUGGGGGAGCUCUGUCCUGUCUCACUCAUUGCUCCUCCCCUGCCUGGCCCAG	#N/A	#N/A	#N/A	#N/A	#N/A
hsa-mir-6750	MI0022595	Chr11	64898363	64898437	-	GCUGUCAGGGAACAGCUGGGUGAGCUGCUGCCCCAGAGGCCCAGCAGGUGUCCAGAACUCACCCUCUGCUCCCAG	#N/A	#N/A	#N/A	#N/A	#N/A
hsa-mir-194-2	MI0000732	Chr11	64891355	64891439	-	UGGUUCCCGCCCCCUGUAACAGCAACUCCAUGUGGAAGUGCCCACUGGUUCCAGUGGGGCUGCUGUUAUCUGGGGCGAGGGCCAG	-1.77825	12.0614	25.83	3.72842e-07	8.78552e-06
hsa-mir-192	MI0000234	Chr11	64891137	64891246	-	GCCGAGACCGAGUGCACAGGGCUCUGACCUAUGAAUUGACAGCCAGUGCUCUCGUCUCCCCUCUGGCUGCCAAUUCCAUAGGUCACAGGUAUGUUCGCCUCAAUGCCAGC	-1.99593	14.3574	28.2702	1.0551e-07	2.79063e-06
hsa-mir-4537	MI0016908	Chr14	105859484	105859553	-	UGAGCCGAGCUGAGCUUAGCUGGGCUGAGCUAACCAGGGCUGGGCUGAGCUGGGCUGAGCUGAGCUGAGC	#N/A	#N/A	#N/A	#N/A	#N/A
hsa-mir-4538	MI0016909	Chr14	105858165	105858242	-	GAGCUUGGAUGAGCUGGGCUGAACUGGGCUGGGUUGAGCUGGGCUGGGCUGAGUUGAGCCAGACUGAUCUGGGCUGAG	#N/A	#N/A	#N/A	#N/A	#N/A
hsa-mir-4507	MI0016871	Chr14	105858124	105858175	-	UCUGGGCUGAGCCGAGCUGGGUUAAGCCGAGCUGGGUUGGGCUGGGCUGGGU	#N/A	#N/A	#N/A	#N/A	#N/A
hsa-mir-4539	MI0016910	Chr14	105857513	105857572	-	UGAGCUGAGCUCUGCUGUGCUGUGCUGAGCAGGGCUGAGCUGAACUGGGCUGAGCUGGGC	#N/A	#N/A	#N/A	#N/A	#N/A
hsa-mir-4732	MI0017369	Chr17	28861655	28861730	-	GAGGGAGCUGUAGAGCAGGGAGCAGGAAGCUGUGUGUGUCCAGCCCUGACCUGUCCUGUUCUGCCCCCAGCCCCUC	-1.82055	-0.584757	7.76305	0.00533259	0.03756
hsa-mir-144	MI0000460	Chr17	28861533	28861618	-	UGGGGCCCUGGCUGGGAUAUCAUCAUAUACUGUAAGUUUGCGAUGAGACACUACAGUAUAGAUGAUGUACUAGUCCGGGCACCCCC	-2.26422	6.84229	19.8626	8.32103e-06	0.000152466
hsa-mir-451b	MI0017360	Chr17	28861371	28861438	+	UGGGUAUAGCAAGAGAACCAUUACCAUUACUAAACUCAGUAAUGGUAACGGUUUCCUUGCCAUUCCCA	#N/A	#N/A	#N/A	#N/A	#N/A
hsa-mir-451a	MI0001729	Chr17	28861369	28861440	-	CUUGGGAAUGGCAAGGAAACCGUUACCAUUACUGAGUUUAGUAAUGGUAAUGGUUCUCUUGCUAUACCCAGA	-1.40978	8.69697	7.41135	0.00648137	0.0432982
hsa-mir-1250	MI0006385	Chr17	81133196	81133308	-	CUGUCCCGCUGGCCUGGCAGGUGACGGUGCUGGAUGUGGCCUUUUUGCCUUUUCUAAAGGCCACAUUUUCCAGCCCAUUCAACCUUCCAGAGCCCUCUGAAGUGGCCACAGGC	3.16776	-0.840839	8.5868	0.00338608	0.0267583
hsa-mir-338	MI0000814	Chr17	81125883	81125949	-	UCUCCAACAAUAUCCUGGUGCUGAGUGAUGACUCAGGCGACUCCAGCAUCAGUGAUUUUGUUGAAGA	#N/A	#N/A	#N/A	#N/A	#N/A
hsa-mir-3065	MI0014228	Chr17	81125877	81125955	+	CUGCCCUCUUCAACAAAAUCACUGAUGCUGGAGUCGCCUGAGUCAUCACUCAGCACCAGGAUAUUGUUGGAGAGGACAG	#N/A	#N/A	#N/A	#N/A	#N/A
hsa-mir-657	MI0003681	Chr17	81125276	81125373	-	GUGUAGUAGAGCUAGGAGGAGAGGGUCCUGGAGAAGCGUGGACCGGUCCGGGUGGGUUCCGGCAGGUUCUCACCCUCUCUAGGCCCCAUUCUCCUCUG	#N/A	#N/A	#N/A	#N/A	#N/A
hsa-mir-371a	MI0000779	Chr19	53787675	53787741	+	GUGGCACUCAAACUGUGGGGGCACUUUCUGCUCUCUGGUGAAAGUGCCGCCAUCUUUUGAGUGUUAC	#N/A	#N/A	#N/A	#N/A	#N/A
hsa-mir-371b	MI0017393	Chr19	53787677	53787742	-	GGUAACACUCAAAAGAUGGCGGCACUUUCACCAGAGAGCAGAAAGUGCCCCCACAGUUUGAGUGCC	#N/A	#N/A	#N/A	#N/A	#N/A
hsa-mir-372	MI0000780	Chr19	53787890	53787956	+	GUGGGCCUCAAAUGUGGAGCACUAUUCUGAUGUCCAAGUGGAAAGUGCUGCGACAUUUGAGCGUCAC	#N/A	#N/A	#N/A	#N/A	#N/A
hsa-mir-373	MI0000781	Chr19	53788705	53788773	+	GGGAUACUCAAAAUGGGGGCGCUUUCCUUUUUGUCUGUACUGGGAAGUGCUUCGAUUUUGGGGUGUCCC	#N/A	#N/A	#N/A	#N/A	#N/A
hsa-mir-23b	MI0000439	Chr9	95085208	95085304	+	CUCAGGUGCUCUGGCUGCUUGGGUUCCUGGCAUGCUGAUUUGUGACUUAAGAUUAAAAUCACAUUGCCAGGGAUUACCACGCAACCACGACCUUGGC	#N/A	#N/A	#N/A	#N/A	#N/A
hsa-mir-27b	MI0000440	Chr9	95085445	95085541	+	ACCUCUCUAACAAGGUGCAGAGCUUAGCUGAUUGGUGAACAGUGAUUGGUUUCCGCUUUGUUCACAGUGGCUAAGUUCUGCACCUGAAGAGAAGGUG	#N/A	#N/A	#N/A	#N/A	#N/A
hsa-mir-3074	MI0014181	Chr9	95086014	95086094	-	GCUCGACUCCUGUUCCUGCUGAACUGAGCCAGUGUGUAAAAUGAGAACUGAUAUCAGCUCAGUAGGCACCGGAGGGCGGGU	#N/A	#N/A	#N/A	#N/A	#N/A
hsa-mir-24-1	MI0000080	Chr9	95086021	95086088	+	CUCCGGUGCCUACUGAGCUGAUAUCAGUUCUCAUUUUACACACUGGCUCAGUUCAGCAGGAACAGGAG	#N/A	#N/A	#N/A	#N/A	#N/A
hsa-mir-508	MI0003195	ChrX	147236913	147237027	-	CCACCUUCAGCUGAGUGUAGUGCCCUACUCCAGAGGGCGUCACUCAUGUAAACUAAAACAUGAUUGUAGCCUUUUGGAGUAGAGUAAUACACAUCACGUAACGCAUAUUUGGUGG	#N/A	#N/A	#N/A	#N/A	#N/A
hsa-mir-507	MI0003194	ChrX	147230984	147231077	-	GUGCUGUGUGUAGUGCUUCACUUCAAGAAGUGCCAUGCAUGUGUCUAGAAAUAUGUUUUGCACCUUUUGGAGUGAAAUAAUGCACAACAGAUAC	#N/A	#N/A	#N/A	#N/A	#N/A
hsa-mir-506	MI0003193	ChrX	147230720	147230843	-	GCCACCACCAUCAGCCAUACUAUGUGUAGUGCCUUAUUCAGGAAGGUGUUACUUAAUAGAUUAAUAUUUGUAAGGCACCCUUCUGAGUAGAGUAAUGUGCAACAUGGACAACAUUUGUGGUGGC	#N/A	#N/A	#N/A	#N/A	#N/A
hsa-mir-513a-2	MI0003192	ChrX	147225826	147225952	-	GGAUGCCACAUUCAGCCAUUCAGUGUGCAGUGCCUUUCACAGGGAGGUGUCAUUUAUGUGAACUAAAAUAUAAAUUUCACCUUUCUGAGAAGGGUAAUGUACAGCAUGCACUGCAUAUGUGGUGUCC	#N/A	#N/A	#N/A	#N/A	#N/A
hsa-mir-509-1	MI0003196	ChrX	147260532	147260625	-	CAUGCUGUGUGUGGUACCCUACUGCAGACAGUGGCAAUCAUGUAUAAUUAAAAAUGAUUGGUACGUCUGUGGGUAGAGUACUGCAUGACACAUG	#N/A	#N/A	#N/A	#N/A	#N/A
hsa-mir-509-3	MI0005717	ChrX	147259652	147259726	-	GUGGUACCCUACUGCAGACGUGGCAAUCAUGUAUAAUUAAAAAUGAUUGGUACGUCUGUGGGUAGAGUACUGCAU	#N/A	#N/A	#N/A	#N/A	#N/A
hsa-mir-509-2	MI0005530	ChrX	147258760	147258850	-	CAUGCUGUGUGUGGUACCCUACUGCAGACAGUGGCAAUCAUGUAUAAUUAAAAAUGAUUGGUACGUCUGUGGGUAGAGUACUGCAUGACAC	#N/A	#N/A	#N/A	#N/A	#N/A
hsa-mir-514b	MI0014251	ChrX	147250151	147250230	-	CAUGUGGUACUCUUCUCAAGAGGGAGGCAAUCAUGUGUAAUUAGAUAUGAUUGACACCUCUGUGAGUGGAGUAACACAUG	#N/A	#N/A	#N/A	#N/A	#N/A
hsa-mir-514a-3	MI0003200	ChrX	147284641	147284728	-	GUUGUCUGUGGUACCCUACUCUGGAGAGUGACAAUCAUGUAUAACUAAAUUUGAUUGACACUUCUGUGAGUAGAGUAACGCAUGACAC	#N/A	#N/A	#N/A	#N/A	#N/A
hsa-mir-514a-2	MI0003199	ChrX	147281943	147282030	-	GUUGUCUGUGGUACCCUACUCUGGAGAGUGACAAUCAUGUAUAACUAAAUUUGAUUGACACUUCUGUGAGUAGAGUAACGCAUGACAC	#N/A	#N/A	#N/A	#N/A	#N/A
hsa-mir-514a-1	MI0003198	ChrX	147279247	147279344	-	AACAUGUUGUCUGUGGUACCCUACUCUGGAGAGUGACAAUCAUGUAUAAUUAAAUUUGAUUGACACUUCUGUGAGUAGAGUAACGCAUGACACGUACG	#N/A	#N/A	#N/A	#N/A	#N/A
hsa-mir-510	MI0003197	ChrX	147272335	147272408	-	GUGGUGUCCUACUCAGGAGAGUGGCAAUCACAUGUAAUUAGGUGUGAUUGAAACCUCUAAGAGUGGAGUAACAC	#N/A	#N/A	#N/A	#N/A	#N/A
hsa-mir-200b	MI0000342	Chr1	1167104	1167198	+	CCAGCUCGGGCAGCCGUGGCCAUCUUACUGGGCAGCAUUGGAUGGAGUCAGGUCUCUAAUACUGCCUGGUAAUGAUGACGGCGGAGCCCUGCACG	2.69272	9.52382	36.6855	1.38811e-09	4.9972e-08
hsa-mir-200a	MI0000737	Chr1	1167863	1167952	+	CCGGGCCCCUGUGAGCAUCUUACCGGACAGUGCUGGAUUUCCCAGCUUGACUCUAACACUGUCUGGUAACGAUGUUCAAAGGUGACCCGC	2.57369	9.65907	30.4401	3.44333e-08	9.4948e-07
hsa-mir-429	MI0001641	Chr1	1169005	1169087	+	CGCCGGCCGAUGGGCGUCUUACCAGACAUGGUUAGACCUGGCCCUCUGUCUAAUACUGUCUGGUAAAACCGUCCAUCCGCUGC	2.6774	6.86683	26.5002	2.63517e-07	6.44373e-06
hsa-mir-199a-2	MI0000281	Chr1	172144535	172144644	-	AGGAAGCUUCUGGAGAUCCUGCUCCGUCGCCCCAGUGUUCAGACUACCUGUUCAGGACAAUGCCGUUGUACAGUAGUCUGCACAUUGGUUAGACUGGGCAAGGGAGAGCA	#N/A	#N/A	#N/A	#N/A	#N/A
hsa-mir-3120	MI0014136	Chr1	172138808	172138888	+	GUCAUGUGACUGCCUGUCUGUGCCUGCUGUACAGGUGAGCGGAUGUUCUGCACAGCAAGUGUAGACAGGCAGACACAUGAC	#N/A	#N/A	#N/A	#N/A	#N/A
hsa-mir-214	MI0000290	Chr1	172138798	172138907	-	GGCCUGGCUGGACAGAGUUGUCAUGUGUCUGCCUGUCUACACUUGCUGUGCAGAACAUCCGCUCACCUGUACAGCAGGCACAGACAGGCAGUCACAUGACAACCCAGCCU	#N/A	#N/A	#N/A	#N/A	#N/A
hsa-mir-100	MI0000102	Chr11	122152229	122152308	-	CCUGUUGCCACAAACCCGUAGAUCCGAACUUGUGGUAUUAGUCCGCACAAGCUUGUAUCUAUAGGUAUGUGUCUGUUAGG	#N/A	#N/A	#N/A	#N/A	#N/A
hsa-mir-10526	MI0033673	Chr11	122152103	122152156	-	UCCCCUUAGUUUCCUUUAAGAGUGAUAAAAAUGGAAAAGGGGGCUGAGGUGGAG	#N/A	#N/A	#N/A	#N/A	#N/A
hsa-let-7a-2	MI0000061	Chr11	122146522	122146593	-	AGGUUGAGGUAGUAGGUUGUAUAGUUUAGAAUUACAUCAAGGGAGAUAACUGUACAGCCUCCUAGCUUUCCU	#N/A	#N/A	#N/A	#N/A	#N/A
hsa-mir-1179	MI0006272	Chr15	88608107	88608197	+	GGCUGGAAAGGAAGAAGCAUUCUUUCAUUGGUUGGUGUGUAUUGCCUUGUCAACCAAUAAGAGGAUGCCAUUUAUCCUUUUCUGACUAGCU	#N/A	#N/A	#N/A	#N/A	#N/A
hsa-mir-7-2	MI0000264	Chr15	88611825	88611934	+	CUGGAUACAGAGUGGACCGGCUGGCCCCAUCUGGAAGACUAGUGAUUUUGUUGUUGUCUUACUGCGCUCAACAACAAAUCCCAGUCUACCUAAUGGUGCCAGCCAUCGCA	#N/A	#N/A	#N/A	#N/A	#N/A
hsa-mir-3529	MI0017351	Chr15	88611847	88611924	-	GGCACCAUUAGGUAGACUGGGAUUUGUUGUUGAGCGCAGUAAGACAACAACAAAAUCACUAGUCUUCCAGAUGGGGCC	#N/A	#N/A	#N/A	#N/A	#N/A
hsa-mir-3677	MI0016078	Chr16	2270713	2270772	+	GGCAGUGGCCAGAGCCCUGCAGUGCUGGGCAUGGGCUUCUCGUGGGCUCUGGCCACGGCC	#N/A	#N/A	#N/A	#N/A	#N/A
hsa-mir-940	MI0005762	Chr16	2271747	2271840	+	GUGAGGUGUGGGCCCGGCCCCAGGAGCGGGGCCUGGGCAGCCCCGUGUGUUGAGGAAGGAAGGCAGGGCCCCCGCUCCCCGGGCCUGACCCCAC	#N/A	#N/A	#N/A	#N/A	#N/A
hsa-mir-4717	MI0017352	Chr16	2274620	2274691	+	GGCAGUGUUUAGGCCACAGCCACCCAUGUGUAGGGGUGGCUACACAUGGGUGGCUGUGGCCUAAACACUGCC	#N/A	#N/A	#N/A	#N/A	#N/A
hsa-mir-3179-1	MI0014213	Chr16	14901508	14901591	+	CAGGAUCACAGACGUUUAAAUUACACUCCUUCUGCUGUGCCUUACAGCAGUAGAAGGGGUGAAAUUUAAACGUCUGUGAUCCUG	#N/A	#N/A	#N/A	#N/A	#N/A
hsa-mir-3670-1	MI0016071	Chr16	14907717	14907781	+	UCUAGACUGGUAUAGCUGCUUUUGGAGCCUCACCUGCUGAGAGCUCACAGCUGUCCUUCUCUAGA	#N/A	#N/A	#N/A	#N/A	#N/A
hsa-mir-3180-1	MI0014214	Chr16	14911220	14911313	+	CAGUGCGACGGGCGGAGCUUCCAGACGCUCCGCCCCACGUCGCAUGCGCCCCGGGAAAGCGUGGGGCGGAGCUUCCGGAGGCCCCGCCCUGCUG	#N/A	#N/A	#N/A	#N/A	#N/A
hsa-mir-3179-2	MI0014216	Chr16	16300159	16300242	+	CAGGAUCACAGACGUUUAAAUUACACUCCUUCUGCUGUGCCUUACAGCAGUAGAAGGGGUGAAAUUUAAACGUCUGUGAUCCUG	#N/A	#N/A	#N/A	#N/A	#N/A
hsa-mir-3670-2	MI0019112	Chr16	16306370	16306434	+	UCUAGACUGGUAUAGCUGCUUUUGGAGCCUCACCUGCUGAGAGCUCACAGCUGUCCUUCUCUAGA	#N/A	#N/A	#N/A	#N/A	#N/A
hsa-mir-3180-2	MI0014215	Chr16	16309879	16309966	+	GCGACGGGCGGAGCUUCCAGACGCUCCGCCCCACGUCGCAUGCGCCCCGGGAAAGCGUGGGGCGGAGCUUCCGGAGGCCCCGCCCUGC	#N/A	#N/A	#N/A	#N/A	#N/A
hsa-mir-3179-3	MI0014221	Chr16	18411894	18411977	-	CAGGAUCACAGACGUUUAAAUUACACUCCUUCUGCUGUGCCUUACAGCAGUAGAAGGGGUGAAAUUUAAACGUCUGUGAUCCUG	#N/A	#N/A	#N/A	#N/A	#N/A
hsa-mir-3670-3	MI0031513	Chr16	18405698	18405762	-	UCUAGACUGGUAUAGCUGCUUUUGGAGCCUCACCUGCUGAGAGCUCACAGCUGUCCUUCUCUAGA	#N/A	#N/A	#N/A	#N/A	#N/A
hsa-mir-3180-3	MI0014217	Chr16	18402178	18402271	-	CAGUGCGACGGGCGGAGCUUCCAGACGCUCCGCCCCACGUCGCAUGCGCCCCGGGAAAGCGUGGGGCGGAGCUUCCGGAGGCCCCGCCCUGCUG	#N/A	#N/A	#N/A	#N/A	#N/A
hsa-mir-23a	MI0000079	Chr19	13836587	13836659	-	GGCCGGCUGGGGUUCCUGGGGAUGGGAUUUGCUUCCUGUCACAAAUCACAUUGCCAGGGAUUUCCAACCGACC	1.34201	11.9687	31.3692	2.13342e-08	6.2839e-07
hsa-mir-27a	MI0000085	Chr19	13836440	13836517	-	CUGAGGAGCAGGGCUUAGCUGCUUGUGAGCAGGGUCCACACCAAGUCGUGUUCACAGUGGCUAAGUUCCGCCCCCCAG	1.76383	10.4065	49.2863	2.21204e-12	1.3031e-10
hsa-mir-24-2	MI0000081	Chr19	13836287	13836359	-	CUCUGCCUCCCGUGCCUACUGAGCUGAAACACAGUUGGUUUGUGUACACUGGCUCAGUUCAGCAGGAACAGGG	#N/A	#N/A	#N/A	#N/A	#N/A
hsa-mir-99b	MI0000746	Chr19	51692612	51692681	+	GGCACCCACCCGUAGAACCGACCUUGCGGGGCCUUCGCCGCACACAAGCUCGUGUCUGUGGGUCCGUGUC	1.13322	14.1653	16.4127	5.0942e-05	0.00075886
hsa-let-7e	MI0000066	Chr19	51692786	51692864	+	CCCGGGCUGAGGUAGGAGGUUGUAUAGUUGAGGAGGACACCCAAGGAGAUCACUAUACGGCCUCCUAGCUUUCCCCAGG	1.22573	9.82413	28.7418	8.27001e-08	2.2329e-06
hsa-mir-125a	MI0000469	Chr19	51693254	51693339	+	UGCCAGUCUCUAGGUCCCUGAGACCCUUUAACCUGUGAGGACAUCCAGGGUCACAGGUGAGGUUCUUGGGAGCCUGGCGUCUGGCC	#N/A	#N/A	#N/A	#N/A	#N/A
hsa-mir-6803	MI0022648	Chr19	55245186	55245250	-	CUCCUCUGGGGGUGGGGGGCUGGGCGUGGUGGACAGCGAUGCAUCCCUCGCCUUCUCACCCUCAG	#N/A	#N/A	#N/A	#N/A	#N/A
hsa-mir-6802	MI0022647	Chr19	55239912	55239976	-	GAGGGCUAGGUGGGGGGCUUGAAGCCCCGAGAUGCCUCACGUCUUCACCCCUCUCACCUAAGCAG	#N/A	#N/A	#N/A	#N/A	#N/A
hsa-mir-6804	MI0022649	Chr19	55230885	55230952	-	GGAUGUGAGGGUGUCAGCAGGUGACGGUGGGGGCCACGCUGACAGCCGCACCUGCCUCUCACCCACAG	#N/A	#N/A	#N/A	#N/A	#N/A
hsa-mir-6724-1	MI0022559	Chr21	8205315	8205406	+	CGCUGCGCUUCUGGGCCCGCGGCGGGCGUGGGGCUGCCCGGGCCGGUCGACCAGCGCGCCGUAGCUCCCGAGGCCCGAGCCGCGACCCGCGG	#N/A	#N/A	#N/A	#N/A	#N/A
hsa-mir-10401	MI0033425	Chr21	8206563	8206618	+	CGUGUGGGAAGGCGUGGGGUGCGGACCCCGGCCCGACCUCGCCGUCCCGCCCGCCG	#N/A	#N/A	#N/A	#N/A	#N/A
hsa-mir-10401	MI0033425	Chr21	8250772	8250827	+	CGUGUGGGAAGGCGUGGGGUGCGGACCCCGGCCCGACCUCGCCGUCCCGCCCGCCG	#N/A	#N/A	#N/A	#N/A	#N/A
hsa-mir-10401	MI0033425	Chr21	8389610	8389665	+	CGUGUGGGAAGGCGUGGGGUGCGGACCCCGGCCCGACCUCGCCGUCCCGCCCGCCG	#N/A	#N/A	#N/A	#N/A	#N/A
hsa-mir-10401	MI0033425	Chr21	8433797	8433852	+	CGUGUGGGAAGGCGUGGGGUGCGGACCCCGGCCCGACCUCGCCGUCCCGCCCGCCG	#N/A	#N/A	#N/A	#N/A	#N/A
hsa-mir-3648-1	MI0016048	Chr21	8208473	8208652	+	CGCGACUGCGGCGGCGGUGGUGGGGGGAGCCGCGGGGAUCGCCGAGGGCCGGUCGGCCGCCCCGGGUGCCGCGCGGUGCCGCCGGCGGCGGUGAGGCCCCGCGCGUGUGUCCCGGCUGCGGUCGGCCGCGCUCGAGGGGUCCCCGUGGCGUCCCCUUCCCCGCCGGCCGCCUUUCUCGCG	#N/A	#N/A	#N/A	#N/A	#N/A
hsa-mir-6724-4	MI0031518	Chr21	8432530	8432621	+	CGCUGCGCUUCUGGGCCCGCGGCGGGCGUGGGGCUGCCCGGGCCGGUCGACCAGCGCGCCGUAGCUCCCGAGGCCCGAGCCGCGACCCGCGG	#N/A	#N/A	#N/A	#N/A	#N/A
hsa-mir-10401	MI0033425	Chr21	8206563	8206618	+	CGUGUGGGAAGGCGUGGGGUGCGGACCCCGGCCCGACCUCGCCGUCCCGCCCGCCG	#N/A	#N/A	#N/A	#N/A	#N/A
hsa-mir-10401	MI0033425	Chr21	8250772	8250827	+	CGUGUGGGAAGGCGUGGGGUGCGGACCCCGGCCCGACCUCGCCGUCCCGCCCGCCG	#N/A	#N/A	#N/A	#N/A	#N/A
hsa-mir-10401	MI0033425	Chr21	8389610	8389665	+	CGUGUGGGAAGGCGUGGGGUGCGGACCCCGGCCCGACCUCGCCGUCCCGCCCGCCG	#N/A	#N/A	#N/A	#N/A	#N/A
hsa-mir-10401	MI0033425	Chr21	8433797	8433852	+	CGUGUGGGAAGGCGUGGGGUGCGGACCCCGGCCCGACCUCGCCGUCCCGCCCGCCG	#N/A	#N/A	#N/A	#N/A	#N/A
hsa-mir-10396b	MI0033426	Chr21	8436324	8436374	+	CGGCGGGGCUCGGAGCCGGGCUUCGGCCGGGCCCCGGGCCCUCGACCGGAC	#N/A	#N/A	#N/A	#N/A	#N/A
hsa-let-7a-3	MI0000062	Chr22	46112749	46112822	+	GGGUGAGGUAGUAGGUUGUAUAGUUUGGGGCUCUGCCCUGCUAUGGGAUAACUAUACAAUCUACUGUCUUUCCU	#N/A	#N/A	#N/A	#N/A	#N/A
hsa-mir-4763	MI0017404	Chr22	46113566	46113657	+	CCUGUCCCUCCUGCCCUGCGCCUGCCCAGCCCUCCUGCUCUGGUGACUGAGGACCGCCAGGCAGGGGCUGGUGCUGGGCGGGGGGCGGCGGG	#N/A	#N/A	#N/A	#N/A	#N/A
hsa-let-7b	MI0000063	Chr22	46113686	46113768	+	CGGGGUGAGGUAGUAGGUUGUGUGGUUUCAGGGCAGUGAUGUUGCCCCUCGGAAGAUAACUAUACAACCUACUGCCUUCCCUG	#N/A	#N/A	#N/A	#N/A	#N/A
hsa-mir-449c	MI0003823	Chr5	55172262	55172353	-	GCUGGGAUGUGUCAGGUAGGCAGUGUAUUGCUAGCGGCUGUUAAUGAUUUUAACAGUUGCUAGUUGCACUCCUCUCUGUUGCAUUCAGAAGC	#N/A	#N/A	#N/A	#N/A	#N/A
hsa-mir-449b	MI0003673	Chr5	55170646	55170742	-	UGACCUGAAUCAGGUAGGCAGUGUAUUGUUAGCUGGCUGCUUGGGUCAAGUCAGCAGCCACAACUACCCUGCCACUUGCUUCUGGAUAAAUUCUUCU	#N/A	#N/A	#N/A	#N/A	#N/A
hsa-mir-449a	MI0001648	Chr5	55170532	55170622	-	CUGUGUGUGAUGAGCUGGCAGUGUAUUGUUAGCUGGUUGAAUAUGUGAAUGGCAUCGGCUAACAUGCAACUGCUGUCUUAUUGCAUAUACA	#N/A	#N/A	#N/A	#N/A	#N/A
hsa-mir-106b	MI0000734	Chr7	100093993	100094074	-	CCUGCCGGGGCUAAAGUGCUGACAGUGCAGAUAGUGGUCCUCUCCGUGCUACCGCACUGUGGGUACUUGCUGCUCCAGCAGG	#N/A	#N/A	#N/A	#N/A	#N/A
hsa-mir-93	MI0000095	Chr7	100093768	100093847	-	CUGGGGGCUCCAAAGUGCUGUUCGUGCAGGUAGUGUGAUUACCCAACCUACUGCUGAGCUAGCACUUCCCGAGCCCCCGG	#N/A	#N/A	#N/A	#N/A	#N/A
hsa-mir-25	MI0000082	Chr7	100093560	100093643	-	GGCCAGUGUUGAGAGGCGGAGACUUGGGCAAUUGCUGGACGCUGCCCUGGGCAUUGCACUUGUCUCGGUCUGACAGUGCCGGCC	#N/A	#N/A	#N/A	#N/A	#N/A
hsa-mir-183	MI0000273	Chr7	129774905	129775014	-	CCGCAGAGUGUGACUCCUGUUCUGUGUAUGGCACUGGUAGAAUUCACUGUGAACAGUCUCAGUCAGUGAAUUACCGAAGGGCCAUAAACAGAGCAGAGACAGAUCCACGA	4.68781	11.8068	88.7014	4.59139e-21	9.91739e-19
hsa-mir-96	MI0000098	Chr7	129774692	129774769	-	UGGCCGAUUUUGGCACUAGCACAUUUUUGCUUGUGUCUCUCCGCUCUGAGCAAUCAUGUGCAGUGCCAAUAUGGGAAA	4.65335	4.41443	75.9689	2.88163e-18	3.11216e-16
hsa-mir-182	MI0000272	Chr7	129770383	129770492	-	GAGCUGCUUGCCUCCCCCCGUUUUUGGCAAUGGUAGAACUCACACUGGUGAGGUAACAGGAUCCGGUGGUUCUAGACUUGCCAACUAUGGGGCGAGGACUCAGCCGGCAC	4.33809	13.4075	92.7229	6.01534e-22	1.94897e-19
hsa-mir-5692a-2	MI0019298	Chr8	12719132	12719190	+	UACAAAUAAUACCACAGUGGGUGUACCUCAUGUGUGUACACCCUGUGAUAUUAUUUGUA	#N/A	#N/A	#N/A	#N/A	#N/A
hsa-mir-3926-1	MI0016434	Chr8	12727232	12727304	-	AAAAUGGAGCUGGCCAAAAAGCAGGCAGAGACUUUAAAAGCGUCUCUGCCUGCUUUUUGGCCAGCUCCGUUUU	#N/A	#N/A	#N/A	#N/A	#N/A
hsa-mir-3926-2	MI0016437	Chr8	12727237	12727299	+	GGAGCUGGCCAAAAAGCAGGCAGAGACGCUUUUAAAGUCUCUGCCUGCUUUUUGGCCAGCUCC	#N/A	#N/A	#N/A	#N/A	#N/A
hsa-mir-6849	MI0022695	Chr8	144400277	144400345	-	CCUGGGAGUGGAUAGGGGAGUGUGUGGAGAGAGCACUGAGCCUGCCCACCAGCCUGUGUCCACCUCCAG	#N/A	#N/A	#N/A	#N/A	#N/A
hsa-mir-1234	MI0006324	Chr8	144400086	144400165	-	GUGAGUGUGGGGUGGCUGGGGCGGGGGGGGCCCGGGGACGGCUUGGGCCUGCCUAGUCGGCCUGACCACCCACCCCACAG	#N/A	#N/A	#N/A	#N/A	#N/A
hsa-mir-939	MI0005761	Chr8	144394149	144394230	-	UGUGGGCAGGGCCCUGGGGAGCUGAGGCUCUGGGGGUGGCCGGGGCUGACCCUGGGCCUCUGCUCCCCAGUGUCUGACCGCG	#N/A	#N/A	#N/A	#N/A	#N/A
hsa-let-7a-1	MI0000060	Chr9	94175957	94176036	+	UGGGAUGAGGUAGUAGGUUGUAUAGUUUUAGGGUCACACCCACCACUGGGAGAUAACUAUACAAUCUACUGUCUUUCCUA	#N/A	#N/A	#N/A	#N/A	#N/A
hsa-let-7f-1	MI0000067	Chr9	94176347	94176433	+	UCAGAGUGAGGUAGUAGAUUGUAUAGUUGUGGGGUAGUGAUUUUACCCUGUUCAGGAGAUAACUAUACAAUCUAUUGCCUUCCCUGA	#N/A	#N/A	#N/A	#N/A	#N/A
hsa-let-7d	MI0000065	Chr9	94178834	94178920	+	CCUAGGAAGAGGUAGUAGGUUGCAUAGUUUUAGGGCAGGGAUUUUGCCCACAAGGAGGUAACUAUACGACCUGCUGCCUUUCUUAGG	#N/A	#N/A	#N/A	#N/A	#N/A
hsa-mir-374c	MI0016684	ChrX	74218549	74218618	+	ACACGGACAAUGAUAAUACAACCUGCUAAGUGCUAGGACACUUAGCAGGUUGUAUUAUAUCCAUCCGAGU	#N/A	#N/A	#N/A	#N/A	#N/A
hsa-mir-374b	MI0005566	ChrX	74218547	74218618	-	ACUCGGAUGGAUAUAAUACAACCUGCUAAGUGUCCUAGCACUUAGCAGGUUGUAUUAUCAUUGUCCGUGUCU	#N/A	#N/A	#N/A	#N/A	#N/A
hsa-mir-421	MI0003685	ChrX	74218377	74218461	-	GCACAUUGUAGGCCUCAUUAAAUGUUUGUUGAAUGAAAAAAUGAAUCAUCAACAGACAUUAAUUGGGCGCCUGCUCUGUGAUCUC	#N/A	#N/A	#N/A	#N/A	#N/A
hsa-mir-105-2	MI0000112	ChrX	152394412	152394492	-	UGUGCAUCGUGGUCAAAUGCUCAGACUCCUGUGGUGGCUGCUUAUGCACCACGGAUGUUUGAGCAUGUGCUAUGGUGUCUA	8.67628	3.0924	7.575	0.00591834	0.0403693
hsa-mir-767	MI0003763	ChrX	152393421	152393529	-	GCUUUUAUAUUGUAGGUUUUUGCUCAUGCACCAUGGUUGUCUGAGCAUGCAGCAUGCUUGUCUGCUCAUACCCCAUGGUUUCUGAGCAGGAACCUUCAUUGUCUACUGC	#N/A	#N/A	#N/A	#N/A	#N/A
hsa-mir-105-1	MI0000111	ChrX	152392219	152392299	-	UGUGCAUCGUGGUCAAAUGCUCAGACUCCUGUGGUGGCUGCUCAUGCACCACGGAUGUUUGAGCAUGUGCUACGGUGUCUA	#N/A	#N/A	#N/A	#N/A	#N/A
hsa-mir-30e	MI0000749	Chr1	40754355	40754446	+	GGGCAGUCUUUGCUACUGUAAACAUCCUUGACUGGAAGCUGUAAGGUGUUCAGAGGAGCUUUCAGUCGGAUGUUUACAGCGGCAGGCUGCCA	-1.00185	13.7945	19.2114	1.17011e-05	0.000210619
hsa-mir-30c-1	MI0000736	Chr1	40757284	40757372	+	ACCAUGCUGUAGUGUGUGUAAACAUCCUACACUCUCAGCUGUGAGCUCAAGGUGGCUGGGAGAGGGUUGUUUACUCCUUCUGCCAUGGA	#N/A	#N/A	#N/A	#N/A	#N/A
hsa-mir-4421	MI0016758	Chr1	51059837	51059905	+	CUGGGUCUCCUUUCUGCUGAGAGUUGAACACUUGUUGGGACAACCUGUCUGUGGAAAGGAGCUACCUAC	#N/A	#N/A	#N/A	#N/A	#N/A
hsa-mir-6500	MI0022211	Chr1	51060018	51060103	+	CCUGCCUGCAGAAAGGAGCUAUCCACUCCAGGUGUCCUUUCUUCUGAGAGCUGGACACUUGUUGGGAUGACCUGCCUGCAGGUAGG	#N/A	#N/A	#N/A	#N/A	#N/A
hsa-mir-3116-1	MI0014128	Chr1	62078786	62078859	+	CUUUAUUGAGUCCCUACUAUGUUCCAGGCACUGGGUAUCGUAGGUGCCUGGAACAUAGUAGGGACUCAAUAAAG	#N/A	#N/A	#N/A	#N/A	#N/A
hsa-mir-3116-2	MI0014129	Chr1	62078789	62078856	-	UAUUGAGUCCCUACUAUGUUCCAGGCACCUACGAUACCCAGUGCCUGGAACAUAGUAGGGACUCAAUA	#N/A	#N/A	#N/A	#N/A	#N/A
hsa-mir-101-1	MI0000103	Chr1	65058434	65058508	-	UGCCCUGGCUCAGUUAUCACAGUGCUGAUGCUGUCUAUUCUAAAGGUACAGUACUGUGAUAACUGAAGGAUGGCA	-2.04053	13.352	56.4601	5.73502e-14	4.12922e-12
hsa-mir-3671	MI0016072	Chr1	65057755	65057842	-	AUGUUAUUGCUGCUGCUGUCACAUUUACAUGAAAAUAAAAUGUAAAUUAUUUUAUUUCUAUCAAAUAAGGACUAGUCUGCAGUGAUAU	#N/A	#N/A	#N/A	#N/A	#N/A
hsa-mir-137	MI0000454	Chr1	98046070	98046171	-	GGUCCUCUGACUCUCUUCGGUGACGGGUAUUCUUGGGUGGAUAAUACGGAUUACGUUGUUAUUGCUUAAGAAUACGCGUAGUCGAGGAGAGUACCAGCGGCA	4.65447	1.53587	8.64115	0.00328655	0.0261311
hsa-mir-2682	MI0012063	Chr1	98045242	98045351	-	ACCUUCCUGAAAGAGGUUGGGGCAGGCAGUGACUGUUCAGACGUCCAAUCUCUUUGGGACGCCUCUUCAGCGCUGUCUUCCCUGCCUCUGCCUUUAGGACGAGUCUCAAA	#N/A	#N/A	#N/A	#N/A	#N/A
hsa-mir-3119-1	MI0014134	Chr1	170151378	170151462	-	AUUAACUCUGGCUUUUAACUUUGAUGGCAAAGGGGUAGCUAAACAAUCUAUGUCUUUGCCAUCAAAGUUAAAAGCCAUAGUUAAU	#N/A	#N/A	#N/A	#N/A	#N/A
hsa-mir-3119-2	MI0014135	Chr1	170151378	170151462	+	AUUAACUAUGGCUUUUAACUUUGAUGGCAAAGACAUAGAUUGUUUAGCUACCCCUUUGCCAUCAAAGUUAAAAGCCAGAGUUAAU	#N/A	#N/A	#N/A	#N/A	#N/A
hsa-mir-1295b	MI0019146	Chr1	171101739	171101798	+	CACCCAGAUCUGCGGCCUAAUCACAGGCCACAUUUCUGAAUAGGCCACGGAUCUGGGCAA	-4.33091	2.68047	34.4995	4.26361e-09	1.45412e-07
hsa-mir-1295a	MI0006357	Chr1	171101728	171101806	-	AGGACAUUUUGCCCAGAUCCGUGGCCUAUUCAGAAAUGUGGCCUGUGAUUAGGCCGCAGAUCUGGGUGAAAUGUCCUCC	#N/A	#N/A	#N/A	#N/A	#N/A
hsa-mir-181a-1	MI0000289	Chr1	198859044	198859153	-	UGAGUUUUGAGGUUGCUUCAGUGAACAUUCAACGCUGUCGGUGAGUUUGGAAUUAAAAUCAAAACCAUCGACCGUUGAUUGUACCCUAUGGCUAACCAUCAUCUACUCCA	1.15407	10.6494	14.8002	0.00011952	0.00164786
hsa-mir-181b-1	MI0000270	Chr1	198858873	198858982	-	CCUGUGCAGAGAUUAUUUUUUAAAAGGUCACAAUCAACAUUCAUUGCUGUCGGUGGGUUGAACUGUGUGGACAAGCUCACUGAACAAUGAAUGCAACUGUGGCCCCGCUU	1.89994	8.43697	31.0077	2.57003e-08	7.24078e-07
hsa-mir-29b-2	MI0000107	Chr1	207802443	207802523	-	CUUCUGGAAGCUGGUUUCACAUGGUGGCUUAGAUUUUUCCAUCUUUGUAUCUAGCACCAUUUGAAAUCAGUGUUUUAGGAG	#N/A	#N/A	#N/A	#N/A	#N/A
hsa-mir-29c	MI0000735	Chr1	207801852	207801939	-	AUCUCUUACACAGGCUGACCGAUUUCUCCUGGUGUUCAGAGUCUGUUUUUGUCUAGCACCAUUUGAAAUCGGUUAUGAUGUAGGGGGA	#N/A	#N/A	#N/A	#N/A	#N/A
hsa-mir-194-1	MI0000488	Chr1	220118157	220118241	-	AUGGUGUUAUCAAGUGUAACAGCAACUCCAUGUGGACUGUGUACCAAUUUCCAGUGGAGAUGCUGUUACUUUUGAUGGUUACCAA	-1.76581	11.9344	25.1464	5.31397e-07	1.20823e-05
hsa-mir-215	MI0000291	Chr1	220117853	220117962	-	AUCAUUCAGAAAUGGUAUACAGGAAAAUGACCUAUGAAUUGACAGACAAUAUAGCUGAGUUUGUCUGUCAUUUCUUUAGGCCAAUAUUCUGUAUGACUGUGCUACUUCAA	#N/A	#N/A	#N/A	#N/A	#N/A
hsa-mir-3155a	MI0014183	Chr10	6152196	6152277	+	UCCGGGCAUCACCUCCCACUGCAGAGCCUGGGGAGCCGGACAGCUCCCUUCCCAGGCUCUGCAGUGGGAACUGAUGCCUGGA	#N/A	#N/A	#N/A	#N/A	#N/A
hsa-mir-3155b	MI0016839	Chr10	6152207	6152262	-	CCACUGCAGAGCCUGGGAAGGGAGCUGUCCGGCUCCCCAGGCUCUGCAGUGGGAGG	#N/A	#N/A	#N/A	#N/A	#N/A
hsa-mir-4679-1	MI0017310	Chr10	89063336	89063410	+	GUCUUUUUUCUGUGAUAGAGAUUCUUUGCUUUGUUAGAAACAAAAAGCAAAGAAUCUCUAUCACAGAAAAAAGAU	#N/A	#N/A	#N/A	#N/A	#N/A
hsa-mir-4679-2	MI0017311	Chr10	89063335	89063411	-	UAUCUUUUUUCUGUGAUAGAGAUUCUUUGCUUUUUGUUUCUAACAAAGCAAAGAAUCUCUAUCACAGAAAAAAGACG	#N/A	#N/A	#N/A	#N/A	#N/A
hsa-mir-3158-1	MI0014186	Chr10	101601417	101601497	+	AUUCAGGCCGGUCCUGCAGAGAGGAAGCCCUUCUGCUUACAGGUAUUGGAAGGGCUUCCUCUCUGCAGGACCGGCCUGAAU	#N/A	#N/A	#N/A	#N/A	#N/A
hsa-mir-3158-2	MI0014187	Chr10	101601417	101601497	-	AUUCAGGCCGGUCCUGCAGAGAGGAAGCCCUUCCAAUACCUGUAAGCAGAAGGGCUUCCUCUCUGCAGGACCGGCCUGAAU	#N/A	#N/A	#N/A	#N/A	#N/A
hsa-mir-6715a	MI0022548	Chr10	112299612	112299690	+	UGGGCUGCGUCCACAGGCACAGCCGGUUUGAGCAUUUUUACUGAAUUGCCAAACCAGUCGUGCCUGUGGGCACAACCUU	-3.45894	1.93609	15.4633	8.41221e-05	0.00119805
hsa-mir-6715b	MI0022549	Chr10	112299612	112299688	-	GGUUGUGCCCACAGGCACGACUGGUUUGGCAAUUCAGUAAAAAUGCUCAAACCGGCUGUGCCUGUGGACGCAGCCCA	#N/A	#N/A	#N/A	#N/A	#N/A
hsa-mir-3160-2	MI0014190	Chr11	46451807	46451887	+	ACCUGCCCUGGGCUUUCUAGUCUCAGCUCUCCUGACCAGCUGAGCUGGAGGAGAGCUGAGACUAGAAAGCCCAGGGCAGGU	#N/A	#N/A	#N/A	#N/A	#N/A
hsa-mir-3160-1	MI0014189	Chr11	46451805	46451889	-	GGACCUGCCCUGGGCUUUCUAGUCUCAGCUCUCCUCCAGCUCAGCUGGUCAGGAGAGCUGAGACUAGAAAGCCCAGGGCAGGUUC	#N/A	#N/A	#N/A	#N/A	#N/A
hsa-mir-6748	MI0022593	Chr11	62789815	62789885	+	UGGUGUGUGGGUGGGAAGGACUGGAUUUGAAAUGGUCCCACUCCUGACGAUCCUGUCCCUGUCUCCUACAG	#N/A	#N/A	#N/A	#N/A	#N/A
hsa-mir-6514	MI0022226	Chr11	62792702	62792771	-	UAUGGAGUGGACUUUCAGCUGGCAUUUACGAGUCAGAGUUCUUACAGAGCUGCCUGUUCUUCCACUCCAG	#N/A	#N/A	#N/A	#N/A	#N/A
hsa-mir-7113	MI0022964	Chr11	68032864	68032922	+	CUCCAGGGAGACAGUGUGUGAGGCCUCUUGCCAUGGCCUCCCUGCCCGCCUCUCUGCAG	#N/A	#N/A	#N/A	#N/A	#N/A
hsa-mir-4691	MI0017324	Chr11	68033897	68033981	+	GGAGCACUCCCAGGUCCUCCAGGCCAUGAGCUGCGGCCCUGAUGUCUCUACUCCAGCCACGGACUGAGAGUGCAUAGGAGUGUCC	#N/A	#N/A	#N/A	#N/A	#N/A
hsa-mir-34b	MI0000742	Chr11	111512938	111513021	+	GUGCUCGGUUUGUAGGCAGUGUCAUUAGCUGAUUGUACUGUGGUGGUUACAAUCACUAACUCCACUGCCAUCAAAACAAGGCAC	6.22956	0.904593	36.8253	1.29203e-09	4.78419e-08
hsa-mir-34c	MI0000743	Chr11	111513439	111513515	+	AGUCUAGUUACUAGGCAGUGUAGUUAGCUGAUUGCUAAUAGUACCAAUCACUAACCACACGGCCAGGUAAAAAGAUU	4.73752	2.95988	43.7504	3.73036e-11	1.72662e-09
hsa-mir-200c	MI0000650	Chr12	6963699	6963766	+	CCCUCGUCUUACCCAGCAGUGUUUGGGUGCGGUUGGGAGUCUCUAAUACUGCCGGGUAAUGAUGGAGG	5.17072	10.6333	16.2547	5.53732e-05	0.000806334
hsa-mir-141	MI0000457	Chr12	6964097	6964191	+	CGGCCGGCCCUGGGUCCAUCUUCCAGUACAGUGUUGGAUGGUCUAAUUGUGAAGCUCCUAACACUGUCUGGUAAAGAUGGCUCCCGGGUGGGUUC	4.72888	8.12613	14.4116	0.000146891	0.00199233
hsa-mir-6758	MI0022603	Chr12	57512688	57512750	+	UGGGCUAGAGAGGGGAAGGAUGUGAUGUGAGCAGAUGGUUCUCACUCAUUCUCCUCUGUCCAG	#N/A	#N/A	#N/A	#N/A	#N/A
hsa-mir-616	MI0003629	Chr12	57519163	57519259	-	UUAGGUAAUUCCUCCACUCAAAACCCUUCAGUGACUUCCAUGACAUGAAAUAGGAAGUCAUUGGAGGGUUUGAGCAGAGGAAUGACCUGUUUUAAAA	-1.03893	2.37407	8.48401	0.00358282	0.0281414
hsa-mir-548c	MI0003630	Chr12	64622509	64622605	+	CAUUGGCAUCUAUUAGGUUGGUGCAAAAGUAAUUGCGGUUUUUGCCAUUACUUUCAGUAGCAAAAAUCUCAAUUACUUUUGCACCAACUUAAUACUU	#N/A	#N/A	#N/A	#N/A	#N/A
hsa-mir-548z	MI0016688	Chr12	64622509	64622605	-	AAGUAUUAAGUUGGUGCAAAAGUAAUUGAGAUUUUUGCUACUGAAAGUAAUGGCAAAAACCGCAAUUACUUUUGCACCAACCUAAUAGAUGCCAAUG	#N/A	#N/A	#N/A	#N/A	#N/A
hsa-mir-3913-2	MI0016418	Chr12	69584723	69584822	+	UGUCUAUAAUAAACUGAAAUAUUUGGGACUGAUCUUGAUGUCUGCCAAGGUUUUGGCAGACAUCAAGAUCAGUCCCAAAUAUUUCAGUUUAUUAUAAACA	#N/A	#N/A	#N/A	#N/A	#N/A
hsa-mir-3913-1	MI0016417	Chr12	69584722	69584823	-	UUGUUUAUAAUAAACUGAAAUAUUUGGGACUGAUCUUGAUGUCUGCCAAAACCUUGGCAGACAUCAAGAUCAGUCCCAAAUAUUUCAGUUUAUUAUAGACAG	1.4078	1.38448	7.42149	0.00644496	0.043278
hsa-mir-5700	MI0019307	Chr12	94561789	94561859	+	UUAAUUAAUGCAUUAAAUUAUUGAAGGCCCUUGGGCACCCCAGGCCUUCAAUAAUUUAAUGCAUUUAUUGA	#N/A	#N/A	#N/A	#N/A	#N/A
hsa-mir-7844	MI0025514	Chr12	94571231	94571352	-	UGAUUGUGCGGACUCGUGUGUAAGAAAAACUAGGACUGUGUGGUGUAAAUAACUACAAUUCUCUUAACUCCGUAGCAGUUGCCAACUCAGUCCUUGUACUUCGUUAACACGAAUCUGUUUCA	#N/A	#N/A	#N/A	#N/A	#N/A
hsa-mir-331	MI0000812	Chr12	95308420	95308513	+	GAGUUUGGUUUUGUUUGGGUUUGUUCUAGGUAUGGUCCCAGGGAUCCCAGAUCAAACCAGGCCCCUGGGCCUAUCCUAGAACCAACCUAAGCUC	#N/A	#N/A	#N/A	#N/A	#N/A
hsa-mir-3685	MI0016086	Chr12	95309923	95309984	+	GUACAUUUCCUACCCUACCUGAAGACUUGAGAUUAUAGUCUUUGGGGGGAUGGGCAAAGUAC	#N/A	#N/A	#N/A	#N/A	#N/A
hsa-mir-15a	MI0000069	Chr13	50049119	50049201	-	CCUUGGAGUAAAGUAGCAGCACAUAAUGGUUUGUGGAUUUUGAAAAGGUGCAGGCCAUAUUGUGCUGCCUCAAAAAUACAAGG	#N/A	#N/A	#N/A	#N/A	#N/A
hsa-mir-16-1	MI0000070	Chr13	50048973	50049061	-	GUCAGCAGUGCCUUAGCAGCACGUAAAUAUUGGCGUUAAGAUUCUAAAAUUAUCUCCAGUAUUAACUGUGCUGCUGAAGUAAGGUUGAC	#N/A	#N/A	#N/A	#N/A	#N/A
hsa-mir-342	MI0000805	Chr14	100109655	100109753	+	GAAACUGGGCUCAAGGUGAGGGGUGCUAUCUGUGAUUGAGGGACAUGGUUAAUGGAAUUGUCUCACACAGAAAUCGCACCCGUCACCUUGGCCUACUUA	#N/A	#N/A	#N/A	#N/A	#N/A
hsa-mir-151b	MI0003772	Chr14	100109419	100109514	-	ACCUCUGAUGUGUCAGUCUCUCUUCAGGGCUCCCGAGACACAGAAACAGACACCUGCCCUCGAGGAGCUCACAGUCUAGACAAACAAACCCAGGGU	#N/A	#N/A	#N/A	#N/A	#N/A
hsa-mir-203a	MI0000283	Chr14	104117405	104117514	+	GUGUUGGGGACUCGCGCGCUGGGUCCAGUGGUUCUUAACAGUUCAACAGUUCUGUAGCGCAAUUGUGAAAUGUUUAGGACCACUAGACCCGGCGGGCGCGGCGACAGCGA	#N/A	#N/A	#N/A	#N/A	#N/A
hsa-mir-203b	MI0017343	Chr14	104117418	104117503	-	GCGCCCGCCGGGUCUAGUGGUCCUAAACAUUUCACAAUUGCGCUACAGAACUGUUGAACUGUUAAGAACCACUGGACCCAGCGCGC	4.94807	3.52663	12.5165	0.000403372	0.00466759
hsa-mir-7973-1	MI0025748	Chr15	51314034	51314109	+	UGUGACCCUAGAAUAAUUACCCAACGUCUCUGAGUCUCGGUUUUGAGAGGGUGAGUAAUUAUUCUAGGGUCACACA	#N/A	#N/A	#N/A	#N/A	#N/A
hsa-mir-7973-2	MI0025749	Chr15	51314032	51314107	-	UGUGACCCUAGAAUAAUUACUCACCCUCUCAAAACCGAGACUCAGAGACGUUGGGUAAUUAUUCUAGGGUCACACA	#N/A	#N/A	#N/A	#N/A	#N/A
hsa-mir-5587	MI0019144	Chr16	535316	535368	+	AUGGUCACCUCCGGGACUCAGCCCUGUGCUGAGCCCCGGGCAGUGUGAUCAUC	#N/A	#N/A	#N/A	#N/A	#N/A
hsa-mir-3176	MI0014210	Chr16	543277	543366	+	UGGCCUCUCCAGUCUGCAGCUCCCGGCAGCCUCGGGCCACACUCCCGGGAUCCCCAGGGACUGGCCUGGGACUACCGGGGGUGGCGGCCG	#N/A	#N/A	#N/A	#N/A	#N/A
hsa-mir-4516	MI0016882	Chr16	2133119	2133204	+	AGGGAGAAGGGUCGGGGCAGGGAGGGCAGGGCAGGCUCUGGGGUGGGGGGUCUGUGAGUCAGCCACGGCUCUGCCCACGUCUCCCC	#N/A	#N/A	#N/A	#N/A	#N/A
hsa-mir-3180-5	MI0016409	Chr16	2135977	2136129	-	GCUCCGCCCCACGUCGCAUGCGCCCCGGGAACGCGUGGGGCGGAGCUUCCGGAGGCCCCGCCCUGCUGCCGACCCUGUGGAGCGGAGGGUGAAGCCUCCGGAUGCCAGUCCCUCAUCGCUGGCCCGGUCGCGCUGUGGCGAAGGGGGCGGAGC	#N/A	#N/A	#N/A	#N/A	#N/A
hsa-mir-193b	MI0003137	Chr16	14303967	14304049	+	GUGGUCUCAGAAUCGGGGUUUUGAGGGCGAGAUGAGUUUAUGUUUUAUCCAACUGGCCCUCAAAGUCCCGCUUUUGGGGUCAU	#N/A	#N/A	#N/A	#N/A	#N/A
hsa-mir-365a	MI0000767	Chr16	14309285	14309371	+	ACCGCAGGGAAAAUGAGGGACUUUUGGGGGCAGAUGUGUUUCCAUUCCACUAUCAUAAUGCCCCUAAAAAUCCUUAUUGCUCUUGCA	-1.13201	5.86836	16.2585	5.52616e-05	0.000806334
hsa-mir-6511a-1	MI0022223	Chr16	14925937	14926003	+	CCUGCAGGCAGAAGUGGGGCUGACAGGGCAGAGGGUUGCGCCCCCUCACCAUCCCUUCUGCCUGCAG	#N/A	#N/A	#N/A	#N/A	#N/A
hsa-mir-6770-1	MI0022615	Chr16	14930820	14930879	+	UAUCCUGAGAAGGCACAGCUUGCACGUGACCUCCUGGGCCUGGCGGCUGUGUCUUCACAG	#N/A	#N/A	#N/A	#N/A	#N/A
hsa-mir-6511a-2	MI0023564	Chr16	16324588	16324654	+	CCUGCAGGCAGAAGUGGGGCUGACAGGGCAGAGGGUUGCGCCCCCUCACCAUCCCUUCUGCCUGCAG	#N/A	#N/A	#N/A	#N/A	#N/A
hsa-mir-6770-2	MI0026418	Chr16	16329305	16329364	+	UAUCCUGAGAAGGCACAGCUUGCACGUGACCUCCUGGGCCUGGCGGCUGUGUCUUCACAG	#N/A	#N/A	#N/A	#N/A	#N/A
hsa-mir-3179-4	MI0031510	Chr16	18494493	18494576	-	CAGGAUCACAGACGUUUAAAUUACACUCCUUCUGCUGUGCCUUACAGCAGUAGAAGGGGUGAAAUUUAAACGUCUGUGAUCCUG	#N/A	#N/A	#N/A	#N/A	#N/A
hsa-mir-3670-4	MI0031514	Chr16	18488301	18488365	-	UCUAGACUGGUAUAGCUGCUUUUGGAGCCUCACCUGCUGAGAGCUCACAGCUGUCCUUCUCUAGA	#N/A	#N/A	#N/A	#N/A	#N/A
hsa-mir-212	MI0000288	Chr17	2050271	2050380	-	CGGGGCACCCCGCCCGGACAGCGCGCCGGCACCUUGGCUCUAGACUGCUUACUGCCCGGGCCGCCCUCAGUAACAGUCUCCAGUCACGGCCACCGACGCCUGGCCCCGCC	#N/A	#N/A	#N/A	#N/A	#N/A
hsa-mir-132	MI0000449	Chr17	2049908	2050008	-	CCGCCCCCGCGUCUCCAGGGCAACCGUGGCUUUCGAUUGUUACUGUGGGAACUGGAGGUAACAGUCUACAGCCAUGGUCGCCCCGCAGCACGCCCACGCGC	#N/A	#N/A	#N/A	#N/A	#N/A
hsa-mir-6865	MI0022712	Chr17	4970086	4970150	-	AUCCAUAGGUGGCAGAGGAGGGACUUCAGAUGCUUCAUGACACCCUCUUUCCCUACCGCCUACAG	#N/A	#N/A	#N/A	#N/A	#N/A
hsa-mir-6864	MI0022711	Chr17	4969702	4969771	-	GAAAGUUGAAGGGACAAGUCAGAUAUGCCAUUAUGUGGGUCAUGAGGUGGUGAGACUUCUCUCCCUUCAG	#N/A	#N/A	#N/A	#N/A	#N/A
hsa-mir-4520-2	MI0017358	Chr17	6655449	6655502	+	CCUGCGUGUUUUCUGUCCAAAUCCUUUUCUGAUUUGGACAGAAAACACGCAGGU	#N/A	#N/A	#N/A	#N/A	#N/A
hsa-mir-4520-1	MI0016886	Chr17	6655440	6655509	-	GUGUGCCACCUGCGUGUUUUCUGUCCAAAUCAGAAAAGGAUUUGGACAGAAAACACGCAGGAAGAAGGAA	#N/A	#N/A	#N/A	#N/A	#N/A
hsa-mir-497	MI0003138	Chr17	7017911	7018022	-	CCACCCCGGUCCUGCUCCCGCCCCAGCAGCACACUGUGGUUUGUACGGCACUGUGGCCACGUCCAAACCACACUGUGGUGUUAGAGCGAGGGUGGGGGAGGCACCGCCGAGG	#N/A	#N/A	#N/A	#N/A	#N/A
hsa-mir-195	MI0000489	Chr17	7017615	7017701	-	AGCUUCCCUGGCUCUAGCAGCACAGAAAUAUUGGCACAGGGAAGCGAGUCUGCCAAUAUUGGCUGUGCUGCUCCAGGCAGGGUGGUG	#N/A	#N/A	#N/A	#N/A	#N/A
hsa-mir-33b	MI0003646	Chr17	17813836	17813931	-	GCGGGCGGCCCCGCGGUGCAUUGCUGUUGCAUUGCACGUGUGUGAGGCGGGUGCAGUGCCUCGGCAGUGCAGCCCGGAGCCGGCCCCUGGCACCAC	-1.54837	2.51157	16.9474	3.84304e-05	0.000607387
hsa-mir-6777	MI0022622	Chr17	17813480	17813545	-	UCAAGACGGGGAGUCAGGCAGUGGUGGAGAUGGAGAGCCCUGAGCCUCCACUCUCCUGGCCCCCAG	#N/A	#N/A	#N/A	#N/A	#N/A
hsa-mir-423	MI0001445	Chr17	30117079	30117172	+	AUAAAGGAAGUUAGGCUGAGGGGCAGAGAGCGAGACUUUUCUAUUUUCCAAAAGCUCGGUCUGAGGCCCCUCAGUCUUGCUUCCUAACCCGCGC	#N/A	#N/A	#N/A	#N/A	#N/A
hsa-mir-3184	MI0014226	Chr17	30117086	30117160	-	AAGCAAGACUGAGGGGCCUCAGACCGAGCUUUUGGAAAAUAGAAAAGUCUCGCUCUCUGCCCCUCAGCCUAACUU	#N/A	#N/A	#N/A	#N/A	#N/A
hsa-mir-4725	MI0017362	Chr17	31575269	31575358	+	GUGUCUCUCUGGAGACCCUGCAGCCUUCCCACCCACCAGGGAGCUUUCCAUGGGCUGUGGGGAAGGCGUCAGUGUCGGGUGAGGGAACAC	#N/A	#N/A	#N/A	#N/A	#N/A
hsa-mir-365b	MI0000769	Chr17	31575411	31575521	+	AGAGUGUUCAAGGACAGCAAGAAAAAUGAGGGACUUUCAGGGGCAGCUGUGUUUUCUGACUCAGUCAUAAUGCCCCUAAAAAUCCUUAUUGUUCUUGCAGUGUGCAUCGGG	-1.1303	5.8612	16.5409	4.76116e-05	0.00073458
hsa-mir-10226	MI0033056	Chr17	48032882	48032951	+	GAGGGAACUUCCAUGUGUCUGGGCUGGGAAACUGGAGUUCUCCACUGGGAGACAUUGAGUGUAUCCUUCU	#N/A	#N/A	#N/A	#N/A	#N/A
hsa-mir-152	MI0000462	Chr17	48037161	48037247	-	UGUCCCCCCCGGCCCAGGUUCUGUGAUACACUCCGACUCGGGCUCUGGAGCAGUCAGUGCAUGACAGAACUUGGGCCCGGAAGGACC	-1.3051	7.71781	37.2539	1.03709e-09	4.20019e-08
hsa-mir-4736	MI0017373	Chr17	58335976	58336022	-	AGGCAGGUUAUCUGGGCUGCCAUCUCCCACUGGCUGCUUGCCUGCCU	#N/A	#N/A	#N/A	#N/A	#N/A
hsa-mir-142	MI0000458	Chr17	58331232	58331318	-	GACAGUGCAGUCACCCAUAAAGUAGAAAGCACUACUAACAGCACUGGAGGGUGUAGUGUUUCCUACUUUAUGGAUGAGUGUACUGUG	#N/A	#N/A	#N/A	#N/A	#N/A
hsa-mir-5047	MI0017932	Chr17	64501214	64501313	-	GAAGCGCUUGCCUAGACGAGACACAGUGCAUAAAAACAACUUUUGGGGGACAGGUAUGUUUUCUUGCAGCUGCGGUUGUAAGGUCUUGGCAAGACAAGCA	#N/A	#N/A	#N/A	#N/A	#N/A
hsa-mir-3064	MI0017375	Chr17	64500774	64500839	-	GGUCUGGCUGUUGUGGUGUGCAAAACUCCGUACAUUGCUAUUUUGCCACACUGCAACACCUUACAG	#N/A	#N/A	#N/A	#N/A	#N/A
hsa-mir-548d-2	MI0003671	Chr17	67471489	67471585	-	GAGAGGGAAGAUUUAGGUUGGUGCAAAAGUAAUUGUGGUUUUUGCCAUUGAAAGUAAUGGCAAAAACCACAGUUUCUUUUGCACCAACCUAAUAAAA	#N/A	#N/A	#N/A	#N/A	#N/A
hsa-mir-548aa-2	MI0016690	Chr17	67471489	67471585	+	UUUUAUUAGGUUGGUGCAAAAGAAACUGUGGUUUUUGCCAUUACUUUCAAUGGCAAAAACCACAAUUACUUUUGCACCAACCUAAAUCUUCCCUCUC	#N/A	#N/A	#N/A	#N/A	#N/A
hsa-mir-4524b	MI0019114	Chr17	69099542	69099656	+	UAGCUGGGUGGAUGUGUUCUUUUGAAGGAUAGCAGCAUAAGCCUGUCUCAAAAUAAUUCUGCAGUGAGACAGGUUCAUGCUGCUAUCGUUCCAAAGAGGAAGGGUAAUCACUGUC	#N/A	#N/A	#N/A	#N/A	#N/A
hsa-mir-4524a	MI0016891	Chr17	69099564	69099632	-	GAACGAUAGCAGCAUGAACCUGUCUCACUGCAGAAUUAUUUUGAGACAGGCUUAUGCUGCUAUCCUUCA	-3.85128	-0.397799	74.7543	5.33085e-18	5.31445e-16
hsa-mir-1-2	MI0000437	Chr18	21829004	21829088	-	ACCUACUCAGAGUACAUACUUCUUUAUGUACCCAUAUGAACAUACAAUGCUAUGGAAUGUAAAGAAGUAUGUAUUUUUGGUAGGC	#N/A	#N/A	#N/A	#N/A	#N/A
hsa-mir-133a-1	MI0000450	Chr18	21825698	21825785	-	ACAAUGCUUUGCUAGAGCUGGUAAAAUGGAACCAAAUCGCCUCUUCAAUGGAUUUGGUCCCCUUCAACCAGCUGUAGCUAUGCAUUGA	#N/A	#N/A	#N/A	#N/A	#N/A
hsa-mir-5583-1	MI0019139	Chr18	39676721	39676779	+	AAACUAAUAUACCCAUAUUCUGGCUAGGUGAUCAUCAGAAUAUGGGUAUAUUAGUUUGG	#N/A	#N/A	#N/A	#N/A	#N/A
hsa-mir-5583-2	MI0019140	Chr18	39676719	39676777	-	AAACUAAUAUACCCAUAUUCUGAUGAUCACCUAGCCAGAAUAUGGGUAUAUUAGUUUGG	#N/A	#N/A	#N/A	#N/A	#N/A
hsa-mir-122	MI0000442	Chr18	58451074	58451158	+	CCUUAGCAGAGCUGUGGAGUGUGACAAUGGUGUUUGUGUCUAAACUAUCAAACGCCAUUAUCACACUAAAUAGCUACUGCUAGGC	-4.12456	13.2819	31.5293	1.96454e-08	5.92104e-07
hsa-mir-122b	MI0017383	Chr18	58451080	58451152	-	CAGUAGCUAUUUAGUGUGAUAAUGGCGUUUGAUAGUUUAGACACAAACACCAUUGUCACACUCCACAGCUCUG	#N/A	#N/A	#N/A	#N/A	#N/A
hsa-mir-4745	MI0017384	Chr19	804940	805001	+	GUGAGUGGGGCUCCCGGGACGGCGCCCGCCCUGGCCCUGGCCCGGCGACGUCUCACGGUCCC	#N/A	#N/A	#N/A	#N/A	#N/A
hsa-mir-3187	MI0014231	Chr19	813584	813653	+	GCUGGCCCUGGGCAGCGUGUGGCUGAAGGUCACCAUGUUCUCCUUGGCCAUGGGGCUGCGCGGGGCCAGC	#N/A	#N/A	#N/A	#N/A	#N/A
hsa-mir-6789	MI0022634	Chr19	2235829	2235926	-	CGAGGUAGGGGCGUCCCGGGCGCGCGGGCGGGUCCCAGGCUGGGCCCCUCGGAGGCCGGGUGCUCACUGCCCCGUCCCGGCGCCCGUGUCUCCUCCAG	#N/A	#N/A	#N/A	#N/A	#N/A
hsa-mir-1227	MI0006316	Chr19	2234062	2234149	-	GUGGGGCCAGGCGGUGGUGGGCACUGCUGGGGUGGGCACAGCAGCCAUGCAGAGCGGGCAUUUGACCCCGUGCCACCCUUUUCCCCAG	#N/A	#N/A	#N/A	#N/A	#N/A
hsa-mir-6790	MI0022635	Chr19	6392921	6392983	-	GUGAGUGUGGAUUUGGCGGGGUUCGGGGGUUCCGACGGCGACCUCGGCGACCCCUCACUCACC	#N/A	#N/A	#N/A	#N/A	#N/A
hsa-mir-6885	MI0022732	Chr19	6389638	6389703	-	CCUGGAGGGGGGCACUGCGCAAGCAAAGCCAGGGACCCUGAGAGGCUUUGCUUCCUGCUCCCCUAG	#N/A	#N/A	#N/A	#N/A	#N/A
hsa-mir-181c	MI0000271	Chr19	13874699	13874808	+	CGGAAAAUUUGCCAAGGGUUUGGGGGAACAUUCAACCUGUCGGUGAGUUUGGGCAGCUCAGGCAAACCAUCGACCGUUGAGUGGACCCUGAGGCCUGGAAUUGCCAUCCU	1.7052	6.87207	23.3478	1.352e-06	2.73779e-05
hsa-mir-181d	MI0003139	Chr19	13874875	13875011	+	GUCCCCUCCCCUAGGCCACAGCCGAGGUCACAAUCAACAUUCAUUGUUGUCGGUGGGUUGUGAGGACUGAGGCCAGACCCACCGGGGGAUGAAUGUCACUGUGGCUGGGCCAGACACGGCUUAAGGGGAAUGGGGAC	2.42439	4.74895	37.1563	1.0903e-09	4.28189e-08
hsa-mir-642a	MI0003657	Chr19	45674928	45675024	+	AUCUGAGUUGGGAGGGUCCCUCUCCAAAUGUGUCUUGGGGUGGGGGAUCAAGACACAUUUGGAGAGGGAACCUCCCAACUCGGCCUCUGCCAUCAUU	1.43823	1.94601	7.66042	0.00564453	0.0391193
hsa-mir-642b	MI0016685	Chr19	45674932	45675008	-	GAGUUGGGAGGUUCCCUCUCCAAAUGUGUCUUGAUCCCCCACCCCAAGACACAUUUGGAGAGGGACCCUCCCAACUC	#N/A	#N/A	#N/A	#N/A	#N/A
hsa-mir-3190	MI0014235	Chr19	47226942	47227021	+	CUGGGGUCACCUGUCUGGCCAGCUACGUCCCCACGGCCCUUGUCAGUGUGGAAGGUAGACGGCCAGAGAGGUGACCCCGG	#N/A	#N/A	#N/A	#N/A	#N/A
hsa-mir-3191	MI0014236	Chr19	47226944	47227019	-	GGGGUCACCUCUCUGGCCGUCUACCUUCCACACUGACAAGGGCCGUGGGGACGUAGCUGGCCAGACAGGUGACCCC	#N/A	#N/A	#N/A	#N/A	#N/A
hsa-mir-10394	MI0033418	Chr19	58393364	58393446	+	UCUGCAGGUCCUGGUGAACGCCAUCAUCAACAGUGGUCCCCGGGAGGACUCCACACGCAUUGGGCGCGCCGGGACUGUGAGAC	#N/A	#N/A	#N/A	#N/A	#N/A
hsa-mir-4754	MI0017394	Chr19	58386770	58386858	-	ACGCGCCUGAUGCGGACCUGGGUUAGCGGAGUGAGGCCCAGUGGUCACCGCCGCCCUCCGCAGGUCCAGGUUGCCGUGCGCAUGUGCCU	#N/A	#N/A	#N/A	#N/A	#N/A
hsa-mir-216a	MI0000292	Chr2	55988950	55989059	-	GAUGGCUGUGAGUUGGCUUAAUCUCAGCUGGCAACUGUGAGAUGUUCAUACAAUCCCUCACAGUGGUCUCUGGGAUUAUGCUAAACAGAGCAAUUUCCUAGCCCUCACGA	#N/A	#N/A	#N/A	#N/A	#N/A
hsa-mir-217	MI0000293	Chr2	55982967	55983076	-	AGUAUAAUUAUUACAUAGUUUUUGAUGUCGCAGAUACUGCAUCAGGAACUGAUUGGAUAAGAAUCAGUCACCAUCAGUUCCUAAUGCAUUGCCUUCAGCAUCUAAACAAG	#N/A	#N/A	#N/A	#N/A	#N/A
hsa-mir-4433a	MI0016773	Chr2	64340759	64340839	+	CAUCCUCCUUACGUCCCACCCCCCACUCCUGUUUCUGGUGAAAUAUUCAAACAGGAGUGGGGGUGGGACAUAAGGAGGAUA	#N/A	#N/A	#N/A	#N/A	#N/A
hsa-mir-4433b	MI0025511	Chr2	64340747	64340848	-	UGUGUUCCCUAUCCUCCUUAUGUCCCACCCCCACUCCUGUUUGAAUAUUUCACCAGAAACAGGAGUGGGGGGUGGGACGUAAGGAGGAUGGGGGAAAGAACA	#N/A	#N/A	#N/A	#N/A	#N/A
hsa-mir-4773-1	MI0017415	Chr2	151368334	151368411	+	UGCUCCCCAGCCUUUCUAUGCUCCUGUUCUGCUUUAUUUCAUCAAAGCAGAACAGGAGCAUAGAAAGGCUGGGGAGCA	2.74769	-0.964825	8.33026	0.003899	0.0302581
hsa-mir-4773-2	MI0017416	Chr2	151368334	151368411	-	UGCUCCCCAGCCUUUCUAUGCUCCUGUUCUGCUUUGAUGAAAUAAAGCAGAACAGGAGCAUAGAAAGGCUGGGGAGCA	2.66123	-0.99824	7.97739	0.00473652	0.0345783
hsa-mir-1245a	MI0006380	Chr2	188978092	188978161	+	AUUUAUGUAUAGGCCUUUAGAUCAUCUGAUGUUGAAUACUCUUUAAGUGAUCUAAAGGCCUACAUAUAAA	#N/A	#N/A	#N/A	#N/A	#N/A
hsa-mir-1245b	MI0017431	Chr2	188978093	188978161	-	UUUAUAUGUAGGCCUUUAGAUCACUUAAAGAGUAUUCAACAUCAGAUGAUCUAAAGGCCUAUACAUAAA	#N/A	#N/A	#N/A	#N/A	#N/A
hsa-mir-3130-1	MI0014147	Chr2	206783234	206783308	-	CUUGUCAUGUCUUACCCAGUCUCCGGUGCAGCCUGUUGUCAAGGCUGCACCGGAGACUGGGUAAGACAUGACAAG	#N/A	#N/A	#N/A	#N/A	#N/A
hsa-mir-3130-2	MI0014148	Chr2	206783234	206783308	+	CUUGUCAUGUCUUACCCAGUCUCCGGUGCAGCCUUGACAACAGGCUGCACCGGAGACUGGGUAAGACAUGACAAG	#N/A	#N/A	#N/A	#N/A	#N/A
hsa-mir-4776-1	MI0017419	Chr2	212926257	212926336	+	CUAUAUGCAGUGGACCAGGAUGGCAAGGGCUCUCCUGAAAGGACAGUAGAGCCCUUGCCAUCCUGGUCCACUGCAUAUAG	#N/A	#N/A	#N/A	#N/A	#N/A
hsa-mir-4776-2	MI0017420	Chr2	212926257	212926336	-	CUAUAUGCAGUGGACCAGGAUGGCAAGGGCUCUACUGUCCUUUCAGGAGAGCCCUUGCCAUCCUGGUCCACUGCAUAUAG	#N/A	#N/A	#N/A	#N/A	#N/A
hsa-mir-103a-2	MI0000108	Chr20	3917494	3917571	+	UUGUGCUUUCAGCUUCUUUACAGUGCUGCCUUGUAGCAUUCAGGUCAAGCAGCAUUGUACAGGGCUAUGAAAGAACCA	#N/A	#N/A	#N/A	#N/A	#N/A
hsa-mir-103b-2	MI0007262	Chr20	3917502	3917563	-	UCAUAGCCCUGUACAAUGCUGCUUGACCUGAAUGCUACAAGGCAGCACUGUAAAGAAGCUGA	#N/A	#N/A	#N/A	#N/A	#N/A
hsa-mir-499a	MI0003183	Chr20	34990376	34990497	+	GCCCUGUCCCCUGUGCCUUGGGCGGGCGGCUGUUAAGACUUGCAGUGAUGUUUAACUCCUCUCCACGUGAACAUCACAGCAAGUCUGUGCUGCUUCCCGUCCCUACGCUGCCUGGGCAGGGU	#N/A	#N/A	#N/A	#N/A	#N/A
hsa-mir-499b	MI0017396	Chr20	34990400	34990472	-	GGAAGCAGCACAGACUUGCUGUGAUGUUCACGUGGAGAGGAGUUAAACAUCACUGCAAGUCUUAACAGCCGCC	#N/A	#N/A	#N/A	#N/A	#N/A
hsa-mir-298	MI0005523	Chr20	58818226	58818313	-	UCAGGUCUUCAGCAGAAGCAGGGAGGUUCUCCCAGUGGUUUUCCUUGACUGUGAGGAACUAGCCUGCUGCUUUGCUCAGGAGUGAGCU	#N/A	#N/A	#N/A	#N/A	#N/A
hsa-mir-296	MI0000747	Chr20	58817615	58817694	-	AGGACCCUUCCAGAGGGCCCCCCCUCAAUCCUGUUGUGCCUAAUUCAGAGGGUUGGGUGGAGGCUCUCCUGAAGGGCUCU	#N/A	#N/A	#N/A	#N/A	#N/A
hsa-mir-647	MI0003662	Chr20	63942631	63942726	-	AGGAAGUGUUGGCCUGUGGCUGCACUCACUUCCUUCAGCCCCAGGAAGCCUUGGUCGGGGGCAGGAGGGAGGGUCAGGCAGGGCUGGGGGCCUGAC	#N/A	#N/A	#N/A	#N/A	#N/A
hsa-mir-1914	MI0008335	Chr20	63941465	63941544	-	CGUGUGAGCCCGCCCUGUGCCCGGCCCACUUCUGCUUCCUCUUAGCGCAGGAGGGGUCCCGCACUGGGAGGGGCCCUCAC	#N/A	#N/A	#N/A	#N/A	#N/A
hsa-mir-6724-2	MI0031516	Chr21	8249505	8249596	+	CGCUGCGCUUCUGGGCCCGCGGCGGGCGUGGGGCUGCCCGGGCCGGUCGACCAGCGCGCCGUAGCUCCCGAGGCCCGAGCCGCGACCCGCGG	#N/A	#N/A	#N/A	#N/A	#N/A
hsa-mir-10401	MI0033425	Chr21	8206563	8206618	+	CGUGUGGGAAGGCGUGGGGUGCGGACCCCGGCCCGACCUCGCCGUCCCGCCCGCCG	#N/A	#N/A	#N/A	#N/A	#N/A
hsa-mir-10401	MI0033425	Chr21	8250772	8250827	+	CGUGUGGGAAGGCGUGGGGUGCGGACCCCGGCCCGACCUCGCCGUCCCGCCCGCCG	#N/A	#N/A	#N/A	#N/A	#N/A
hsa-mir-10401	MI0033425	Chr21	8389610	8389665	+	CGUGUGGGAAGGCGUGGGGUGCGGACCCCGGCCCGACCUCGCCGUCCCGCCCGCCG	#N/A	#N/A	#N/A	#N/A	#N/A
hsa-mir-10401	MI0033425	Chr21	8433797	8433852	+	CGUGUGGGAAGGCGUGGGGUGCGGACCCCGGCCCGACCUCGCCGUCCCGCCCGCCG	#N/A	#N/A	#N/A	#N/A	#N/A
hsa-mir-6724-3	MI0031517	Chr21	8388362	8388453	+	CGCUGCGCUUCUGGGCCCGCGGCGGGCGUGGGGCUGCCCGGGCCGGUCGACCAGCGCGCCGUAGCUCCCGAGGCCCGAGCCGCGACCCGCGG	#N/A	#N/A	#N/A	#N/A	#N/A
hsa-mir-10401	MI0033425	Chr21	8206563	8206618	+	CGUGUGGGAAGGCGUGGGGUGCGGACCCCGGCCCGACCUCGCCGUCCCGCCCGCCG	#N/A	#N/A	#N/A	#N/A	#N/A
hsa-mir-10401	MI0033425	Chr21	8250772	8250827	+	CGUGUGGGAAGGCGUGGGGUGCGGACCCCGGCCCGACCUCGCCGUCCCGCCCGCCG	#N/A	#N/A	#N/A	#N/A	#N/A
hsa-mir-10401	MI0033425	Chr21	8389610	8389665	+	CGUGUGGGAAGGCGUGGGGUGCGGACCCCGGCCCGACCUCGCCGUCCCGCCCGCCG	#N/A	#N/A	#N/A	#N/A	#N/A
hsa-mir-10401	MI0033425	Chr21	8433797	8433852	+	CGUGUGGGAAGGCGUGGGGUGCGGACCCCGGCCCGACCUCGCCGUCCCGCCCGCCG	#N/A	#N/A	#N/A	#N/A	#N/A
hsa-mir-3648-2	MI0031512	Chr21	8986999	8987178	+	CGCGACUGCGGCGGCGGUGGUGGGGGGAGCCGCGGGGAUCGCCGAGGGCCGGUCGGCCGCCCCGGGUGCCGCGCGGUGCCGCCGGCGGCGGUGAGGCCCCGCGCGUGUGUCCCGGCUGCGGUCGGCCGCGCUCGAGGGGUCCCCGUGGCGUCCCCUUCCCCGCCGGCCGCCUUUCUCGCG	#N/A	#N/A	#N/A	#N/A	#N/A
hsa-mir-10396a	MI0033420	Chr21	8987617	8987665	+	GGCGGGGCUCGGAGCCGGGCUUCGGCCGGGCCCCGGGCCCUCGACCGGG	#N/A	#N/A	#N/A	#N/A	#N/A
hsa-mir-99a	MI0000101	Chr21	16539089	16539169	+	CCCAUUGGCAUAAACCCGUAGAUCCGAUCUUGUGGUGAAGUGGACCGCACAAGCUCGCUUCUAUGGGUCUGUGUCAGUGUG	-2.38679	9.63443	83.0635	7.94597e-20	1.14422e-17
hsa-let-7c	MI0000064	Chr21	16539828	16539911	+	GCAUCCGGGUUGAGGUAGUAGGUUGUAUGGUUUAGAGUUACACCCUGGGAGUUAACUGUACAACCUUCUAGCUUUCCUUGGAGC	-2.25821	10.9528	85.4279	2.40311e-20	3.89303e-18
hsa-mir-3618	MI0016008	Chr22	20085746	20085833	+	UAAGCUGAGUGCAUUGUGAUUUCCAAUAAUUGAGGCAGUGGUUCUAAAAGCUGUCUACAUUAAUGAAAAGAGCAAUGUGGCCAGCUUG	#N/A	#N/A	#N/A	#N/A	#N/A
hsa-mir-1306	MI0006443	Chr22	20086058	20086142	+	GUGAGCAGUCUCCACCACCUCCCCUGCAAACGUCCAGUGGUGCAGAGGUAAUGGACGUUGGCUCUGGUGGUGAUGGACAGUCCGA	#N/A	#N/A	#N/A	#N/A	#N/A
hsa-mir-301b	MI0005568	Chr22	21652981	21653058	+	GCCGCAGGUGCUCUGACGAGGUUGCACUACUGUGCUCUGAGAAGCAGUGCAAUGAUAUUGUCAAAGCAUCUGGGACCA	#N/A	#N/A	#N/A	#N/A	#N/A
hsa-mir-130b	MI0000748	Chr22	21653304	21653385	+	GGCCUGCCCGACACUCUUUCCCUGUUGCACUACUAUAGGCCGCUGGGAAGCAGUGCAAUGAUGAAAGGGCAUCGGUCAGGUC	#N/A	#N/A	#N/A	#N/A	#N/A
hsa-mir-3199-2	MI0014248	Chr22	27920526	27920611	+	GUGACUCCCAGGGACUGCCUUAGGAGAAAGUUUCUGGAAUGUCAGAACUUCCAGAAACUUUCUCCUAAGGCAGUCCCUGGAGUCAC	#N/A	#N/A	#N/A	#N/A	#N/A
hsa-mir-3199-1	MI0014247	Chr22	27920525	27920612	-	GGUGACUCCAGGGACUGCCUUAGGAGAAAGUUUCUGGAAGUUCUGACAUUCCAGAAACUUUCUCCUAAGGCAGUCCCUGGGAGUCACU	#N/A	#N/A	#N/A	#N/A	#N/A
hsa-mir-3909	MI0016413	Chr22	35335640	35335758	+	GGUAUGCUGUUGCGCUGUCCUUCCUCUGGGGAGCAGGCUCCGGGGGACAGGGAAAAGCACACAAGGAACUUGUCCUCUAGGGCCUGCAGUCUCAUGGGAGAGUGACAUGCACCAGGACC	#N/A	#N/A	#N/A	#N/A	#N/A
hsa-mir-6069	MI0020346	Chr22	35336721	35336799	-	UGGUGACCCCUGGGCUAGGGCCUGCUGCCCCCUGCCCAGUGCAGGAGGGUGGAGGGUCACUCCUUAGGUGGUCCCAGUG	#N/A	#N/A	#N/A	#N/A	#N/A
hsa-mir-659	MI0003683	Chr22	37847678	37847774	-	UACCGACCCUCGAUUUGGUUCAGGACCUUCCCUGAACCAAGGAAGAGUCACAGUCUCUUCCUUGGUUCAGGGAGGGUCCCCAACAAUGUCCUCAUGG	#N/A	#N/A	#N/A	#N/A	#N/A
hsa-mir-658	MI0003682	Chr22	37844272	37844371	-	GCUCGGUUGCCGUGGUUGCGGGCCCUGCCCGCCCGCCAGCUCGCUGACAGCACGACUCAGGGCGGAGGGAAGUAGGUCCGUUGGUCGGUCGGGAACGAGG	#N/A	#N/A	#N/A	#N/A	#N/A
hsa-mir-191	MI0000465	Chr3	49020618	49020709	-	CGGCUGGACAGCGGGCAACGGAAUCCCAAAAGCAGCUGUUGUCUCCAGAGCAUUCCAGCUGCGCUUGGAUUUCGUCCCCUGCUCUCCUGCCU	#N/A	#N/A	#N/A	#N/A	#N/A
hsa-mir-425	MI0001448	Chr3	49020148	49020234	-	GAAAGCGCUUUGGAAUGACACGAUCACUCCCGUUGAGUGGGCACCCGAGAAGCCAUCGGGAAUGUCGUGUCCGCCCAGUGCUCUUUC	#N/A	#N/A	#N/A	#N/A	#N/A
hsa-mir-15b	MI0000438	Chr3	160404588	160404685	+	UUGAGGCCUUAAAGUACUGUAGCAGCACAUCAUGGUUUACAUGCUACAGUCAAGAUGCGAAUCAUUAUUUGCUGCUCUAGAAAUUUAAGGAAAUUCAU	#N/A	#N/A	#N/A	#N/A	#N/A
hsa-mir-16-2	MI0000115	Chr3	160404745	160404825	+	GUUCCACUCUAGCAGCACGUAAAUAUUGGCGUAGUGAAAUAUAUAUUAAACACCAAUAUUACUGUGCUGCUUUAGUGUGAC	#N/A	#N/A	#N/A	#N/A	#N/A
hsa-mir-4450	MI0016795	Chr4	76573568	76573632	+	UGUCUGGGGAUUUGGAGAAGUGGUGAGCGCAGGUCUUUGGCACCAUCUCCCCUGGUCCCUUGGCU	#N/A	#N/A	#N/A	#N/A	#N/A
hsa-mir-548ah	MI0016796	Chr4	76575551	76575626	+	AGGUUGGUGCAAAAGUGAUUGCAGUGUUUGCCAAUAAAAGUAAUGACAAAAACUGCAGUUACUUUUGCACCAGCCC	#N/A	#N/A	#N/A	#N/A	#N/A
hsa-mir-3688-2	MI0017447	Chr4	159128805	159128891	+	UCACUUUAAAGAGUGGCAAAGUCUUUCCAUAUGUGUAACAGACAUACAUACAUACAUAUGGAAAGACUUUGCCACUCUUGAAAGUGA	#N/A	#N/A	#N/A	#N/A	#N/A
hsa-mir-3688-1	MI0016089	Chr4	159128802	159128894	-	UCUUCACUUUCAAGAGUGGCAAAGUCUUUCCAUAUGUAUGUAUGUAUGUCUGUUACACAUAUGGAAAGACUUUGCCACUCUUUAAAGUGAAGA	#N/A	#N/A	#N/A	#N/A	#N/A
hsa-mir-143	MI0000459	Chr5	149428918	149429023	+	GCGCAGCGCCCUGUCUCCCAGCCUGAGGUGCAGUGCUGCAUCUCUGGUCAGUUGGGAGUCUGAGAUGAAGCACUGUAGCUCAGGAAGAGAGAAGUUGUUCUGCAGC	#N/A	#N/A	#N/A	#N/A	#N/A
hsa-mir-145	MI0000461	Chr5	149430646	149430733	+	CACCUUGUCCUCACGGUCCAGUUUUCCCAGGAAUCCCUUAGAUGCUAAGAUGGGGAUUCCUGGAAAUACUGUUCUUGAGGUCAUGGUU	#N/A	#N/A	#N/A	#N/A	#N/A
hsa-mir-103b-1	MI0007261	Chr5	168560904	168560965	+	UCAUAGCCCUGUACAAUGCUGCUUGAUCCAUAUGCAACAAGGCAGCACUGUAAAGAAGCCGA	#N/A	#N/A	#N/A	#N/A	#N/A
hsa-mir-103a-1	MI0000109	Chr5	168560896	168560973	-	UACUGCCCUCGGCUUCUUUACAGUGCUGCCUUGUUGCAUAUGGAUCAAGCAGCAUUGUACAGGGCUAUGAAGGCAUUG	#N/A	#N/A	#N/A	#N/A	#N/A
hsa-mir-5683	MI0019284	Chr6	6169334	6169409	+	GGAGCUUGUUACAGAUGCAGAUUCUCUGACUUCUUACUGCACCAGUGAAGUCAGGAUCUGCAUUUGAAUAAGACCC	#N/A	#N/A	#N/A	#N/A	#N/A
hsa-mir-7853	MI0025523	Chr6	6169304	6169435	-	UCUCACACUUCAAUAGGCAUUGUCUGGGGUCUUAUUCAAAUGCAGAUCCUGACUUCACUGGUGCAGUAAGAAGUCAGAGAAUCUGCAUCUGUAACAAGCUCCCAGGUGAUGAUGGUGCUGCUGGUGUGCAGA	#N/A	#N/A	#N/A	#N/A	#N/A
hsa-mir-6833	MI0022678	Chr6	32179816	32179876	+	AAACGGUGUGGAAGAUGGGAGGAGAAAAAUCCCUGUUAACUUUCUCUCUCCACUUCCUCAG	#N/A	#N/A	#N/A	#N/A	#N/A
hsa-mir-6721	MI0022556	Chr6	32170030	32170116	-	CCCUCAUCUCUGGGCAGGGGCUUAUUGUAGGAGUCUCUGAAGAGAGCUGUGGACUGACCUGCUUUAACCCUUCCCCAGGUUCCCAUU	#N/A	#N/A	#N/A	#N/A	#N/A
hsa-mir-6834	MI0022679	Chr6	33290245	33290325	+	GUGAGGGACUGGGAUUUGUGGGGCGAGGAGGGACCUGUACUAGCCAUGGUUCUGAUCACAUAUGUCCCAUCCCUCCAUCAG	#N/A	#N/A	#N/A	#N/A	#N/A
hsa-mir-6873	MI0022720	Chr6	33287227	33287289	-	CCCAGCAGAGGGAAUACAGAGGGCAAUCAGGACUGGGUCAUUCUCUCUGUCUUUCUCUCUCAG	#N/A	#N/A	#N/A	#N/A	#N/A
hsa-mir-206	MI0000490	Chr6	52144349	52144434	+	UGCUUCCCGAGGCCACAUGCUUCUUUAUAUCCCCAUAUGGAUUACUUUGCUAUGGAAUGUAAGGAAGUGUGUGGUUUCGGCAAGUG	#N/A	#N/A	#N/A	#N/A	#N/A
hsa-mir-133b	MI0000822	Chr6	52148923	52149041	+	CCUCAGAAGAAAGAUGCCCCCUGCUCUGGCUGGUCAAACGGAACCAAGUCCGUCUUCCUGAGAGGUUUGGUCCCCUUCAACCAGCUACAGCAGGGCUGGCAAUGCCCAGUCCUUGGAGA	#N/A	#N/A	#N/A	#N/A	#N/A
hsa-mir-550a-1	MI0003600	Chr7	30289794	30289890	+	UGAUGCUUUGCUGGCUGGUGCAGUGCCUGAGGGAGUAAGAGCCCUGUUGUUGUAAGAUAGUGUCUUACUCCCUCAGGCACAUCUCCAACAAGUCUCU	#N/A	#N/A	#N/A	#N/A	#N/A
hsa-mir-550b-1	MI0016686	Chr7	30289794	30289890	-	AGAGACUUGUUGGAGAUGUGCCUGAGGGAGUAAGACACUAUCUUACAACAACAGGGCUCUUACUCCCUCAGGCACUGCACCAGCCAGCAAAGCAUCA	#N/A	#N/A	#N/A	#N/A	#N/A
hsa-mir-550a-2	MI0003601	Chr7	32732981	32733077	+	UGAUGCUUUGCUGGCUGGUGCAGUGCCUGAGGGAGUAAGAGCCCUGUUGUUGUCAGAUAGUGUCUUACUCCCUCAGGCACAUCUCCAGCGAGUCUCU	#N/A	#N/A	#N/A	#N/A	#N/A
hsa-mir-550b-2	MI0016687	Chr7	32732981	32733077	-	AGAGACUCGCUGGAGAUGUGCCUGAGGGAGUAAGACACUAUCUGACAACAACAGGGCUCUUACUCCCUCAGGCACUGCACCAGCCAGCAAAGCAUCA	#N/A	#N/A	#N/A	#N/A	#N/A
hsa-mir-3914-2	MI0016421	Chr7	71307674	71307768	+	GAGUUCCUACUCAACUUCUCAUUUUCUGGUUCCUUCUACCAAGUUAAGCAUACUCAUUAGAAGGAACCAGAAAAUGAGAAGUUAAAUCUGAAGUC	#N/A	#N/A	#N/A	#N/A	#N/A
hsa-mir-3914-1	MI0016419	Chr7	71307672	71307770	-	UGGACUUCAGAUUUAACUUCUCAUUUUCUGGUUCCUUCUAAUGAGUAUGCUUAACUUGGUAGAAGGAACCAGAAAAUGAGAAGUUGAGUAGGAACUCUA	#N/A	#N/A	#N/A	#N/A	#N/A
hsa-mir-489	MI0003124	Chr7	93483936	93484019	-	GUGGCAGCUUGGUGGUCGUAUGUGUGACGCCAUUUACUUGAACCUUUAGGAGUGACAUCACAUAUACGGCAGCUAAACUGCUAC	#N/A	#N/A	#N/A	#N/A	#N/A
hsa-mir-653	MI0003674	Chr7	93482760	93482855	-	UUCAUUCCUUCAGUGUUGAAACAAUCUCUACUGAACCAGCUUCAAACAAGUUCACUGGAGUUUGUUUCAAUAUUGCAAGAAUGAUAAGAUGGAAGC	#N/A	#N/A	#N/A	#N/A	#N/A
hsa-mir-5692a-1	MI0019297	Chr7	97963658	97963726	+	GACAGUACAAAUAAUACCACAGUGGGUGUACCUCAUGUGUGUACACCCUGUGAUAUUAUUUGUAAUAUC	#N/A	#N/A	#N/A	#N/A	#N/A
hsa-mir-5692c-2	MI0019289	Chr7	97964405	97964481	-	UGUGUACACCAACUGUGAUAUUAGGAGUCCUAUUUAUUUUUAGGAUAUUAGGAAUAAUAUCACAGUAGGUGUACACA	#N/A	#N/A	#N/A	#N/A	#N/A
hsa-mir-5090	MI0017979	Chr7	102465742	102465826	+	UCUGAGGUACCCGGGGCAGAUUGGUGUAGGGUGCAAAGCCUGCCCGCCCCCUAAGCCUUCUGCCCCCAACUCCAGCCUGUCAGGA	#N/A	#N/A	#N/A	#N/A	#N/A
hsa-mir-4467	MI0016818	Chr7	102471469	102471531	+	UGGUGGCGGCGGUAGUUAUGGGCUUCUCUUUCUCACCAGCAGCCCCUGGGCCGCCGCCUCCCU	#N/A	#N/A	#N/A	#N/A	#N/A
hsa-mir-29b-1	MI0000105	Chr7	130877459	130877539	-	CUUCAGGAAGCUGGUUUCAUAUGGUGGUUUAGAUUUAAAUAGUGAUUGUCUAGCACCAUUUGAAAUCAGUGUUCUUGGGGG	#N/A	#N/A	#N/A	#N/A	#N/A
hsa-mir-29a	MI0000087	Chr7	130876747	130876810	-	AUGACUGAUUUCUUUUGGUGUUCAGAGUCAAUAUAAUUUUCUAGCACCAUCUGAAAUCGGUUAU	#N/A	#N/A	#N/A	#N/A	#N/A
hsa-mir-4659a	MI0017287	Chr8	6745164	6745244	+	GAAACUGCUGAAGCUGCCAUGUCUAAGAAGAAAACUUUGGAGAAAAAUUUUCUUCUUAGACAUGGCAACGUCAACAGUUUC	#N/A	#N/A	#N/A	#N/A	#N/A
hsa-mir-4659b	MI0017291	Chr8	6745168	6745240	-	CUGUUGACGUUGCCAUGUCUAAGAAGAAAAUUUUUCUCCAAAGUUUUCUUCUUAGACAUGGCAGCUUCAGCAG	#N/A	#N/A	#N/A	#N/A	#N/A
hsa-mir-3622a	MI0016013	Chr8	27701677	27701759	+	AAUAGAGGGUGCACAGGCACGGGAGCUCAGGUGAGGCAGGGAGCUGAGCUCACCUGACCUCCCAUGCCUGUGCACCCUCUAUU	#N/A	#N/A	#N/A	#N/A	#N/A
hsa-mir-3622b	MI0016014	Chr8	27701673	27701767	-	AGUGAUAUAAUAGAGGGUGCACAGGCAUGGGAGGUCAGGUGAGCUCAGCUCCCUGCCUCACCUGAGCUCCCGUGCCUGUGCACCCUCUAUUGGCU	#N/A	#N/A	#N/A	#N/A	#N/A
hsa-mir-486-2	MI0023622	Chr8	41660444	41660507	+	UCCUGUACUGAGCUGCCCCGAGCUGGGCAGCAUGAAGGGCCUCGGGGCAGCUCAGUACAGGAUG	-1.62689	5.61304	11.9203	0.000555252	0.00615048
hsa-mir-486-1	MI0002470	Chr8	41660441	41660508	-	GCAUCCUGUACUGAGCUGCCCCGAGGCCCUUCAUGCUGCCCAGCUCGGGGCAGCUCAGUACAGGAUAC	-1.69858	5.61543	13.8596	0.000196985	0.00255292
hsa-mir-5681a	MI0019281	Chr8	74548543	74548617	+	AGUUUUUGAAGAGUAUUGCCACCCUUUCUAGUCCCUAUUAGACUAGAAAGGGUGGCAAUACCUCUUCCAAAAACU	#N/A	#N/A	#N/A	#N/A	#N/A
hsa-mir-5681b	MI0019293	Chr8	74548550	74548609	-	GAAGAGGUAUUGCCACCCUUUCUAGUCUAAUAGGGACUAGAAAGGGUGGCAAUACUCUUC	#N/A	#N/A	#N/A	#N/A	#N/A
hsa-mir-3150a	MI0014177	Chr8	95072914	95072993	+	GGGAAGCAGGCCAACCUCGACGAUCUCCUCAGCACCUGAACGCCAAGGCUGGGGAGAUCCUCGAGGUUGGCCUGCUUUCC	#N/A	#N/A	#N/A	#N/A	#N/A
hsa-mir-3150b	MI0016426	Chr8	95072911	95072996	-	GAGGGAAAGCAGGCCAACCUCGAGGAUCUCCCCAGCCUUGGCGUUCAGGUGCUGAGGAGAUCGUCGAGGUUGGCCUGCUUCCCCUC	#N/A	#N/A	#N/A	#N/A	#N/A
hsa-mir-875	MI0005541	Chr8	99536786	99536861	-	UUAGUGGUACUAUACCUCAGUUUUAUCAGGUGUUCUUAAAAUCACCUGGAAACACUGAGGUUGUGUCUCACUGAAC	#N/A	#N/A	#N/A	#N/A	#N/A
hsa-mir-599	MI0003611	Chr8	99536636	99536730	-	AAAGACAUGCUGUCCACAGUGUGUUUGAUAAGCUGACAUGGGACAGGGAUUCUUUUCACUGUUGUGUCAGUUUAUCAAACCCAUACUUGGAUGAC	#N/A	#N/A	#N/A	#N/A	#N/A
hsa-mir-548d-1	MI0003668	Chr8	123348034	123348130	-	AAACAAGUUAUAUUAGGUUGGUGCAAAAGUAAUUGUGGUUUUUGCCUGUAAAAGUAAUGGCAAAAACCACAGUUUCUUUUGCACCAGACUAAUAAAG	#N/A	#N/A	#N/A	#N/A	#N/A
hsa-mir-548aa-1	MI0016689	Chr8	123348034	123348130	+	CUUUAUUAGUCUGGUGCAAAAGAAACUGUGGUUUUUGCCAUUACUUUUACAGGCAAAAACCACAAUUACUUUUGCACCAACCUAAUAUAACUUGUUU	#N/A	#N/A	#N/A	#N/A	#N/A
hsa-mir-4662a	MI0017290	Chr8	124821985	124822051	+	UCUAUUUAGCCAAUUGUCCAUCUUUAGCUAUUCUGAAUGCCUAAAGAUAGACAAUUGGCUAAAUAGA	-3.13075	4.55629	89.4701	3.11306e-21	8.06905e-19
hsa-mir-4662b	MI0017293	Chr8	124821978	124822058	-	CACAAUUUCUAUUUAGCCAAUUGUCUAUCUUUAGGCAUUCAGAAUAGCUAAAGAUGGACAAUUGGCUAAAUAGACACUGUG	#N/A	#N/A	#N/A	#N/A	#N/A
hsa-mir-30d	MI0000255	Chr8	134804876	134804945	-	GUUGUUGUAAACAUCCCCGACUGGAAGCUGUAAGACACAGCUAAGCUUUCAGUCAGAUGUUUGCUGCUAC	#N/A	#N/A	#N/A	#N/A	#N/A
hsa-mir-30b	MI0000441	Chr8	134800520	134800607	-	ACCAAGUUUCAGUUCAUGUAAACAUCCUACACUCAGCUGUAAUACAUGGAUUGGCUGGGAGGUGGAUGUUUACUUCAGCUGACUUGGA	#N/A	#N/A	#N/A	#N/A	#N/A
hsa-mir-4477a	MI0016829	Chr9	41233755	41233835	+	UCCUCCUCCCAUCAAUCACAAAUGUCCUUAAUGGCAUUUAAGGAUUGCUAUUAAGGACAUUUGUGAUUCACGGGAGGAGGU	#N/A	#N/A	#N/A	#N/A	#N/A
hsa-mir-4477b	MI0016830	Chr9	41233755	41233835	+	ACCUCCUCCCGUGAAUCACAAAUGUCCUUAAUAGCAAUCCUUAAAUGCCAUUAAGGACAUUUGUGAUUGAUGGGAGGAGGA	#N/A	#N/A	#N/A	#N/A	#N/A
hsa-mir-4477a	MI0016829	Chr9	41233755	41233835	-	UCCUCCUCCCAUCAAUCACAAAUGUCCUUAAUGGCAUUUAAGGAUUGCUAUUAAGGACAUUUGUGAUUCACGGGAGGAGGU	#N/A	#N/A	#N/A	#N/A	#N/A
hsa-mir-4477b	MI0016830	Chr9	41233755	41233835	-	ACCUCCUCCCGUGAAUCACAAAUGUCCUUAAUAGCAAUCCUUAAAUGCCAUUAAGGACAUUUGUGAUUGAUGGGAGGAGGA	#N/A	#N/A	#N/A	#N/A	#N/A
hsa-mir-3910-1	MI0016414	Chr9	91636251	91636361	+	CUUUUGCUGUCAGUUUUUCUGUUGCUUGUCUUGGUUUUAUGCCUUUUAUAUCAAGGCACAUAAAAGGCAUAAAACCAAGACAAGCAACAAAAAAAGGAUUGAUCACAGAAG	#N/A	#N/A	#N/A	#N/A	#N/A
hsa-mir-3910-2	MI0016431	Chr9	91636264	91636345	-	UUUUUUUGUUGCUUGUCUUGGUUUUAUGCCUUUUAUGUGCCUUGAUAUAAAAGGCAUAAAACCAAGACAAGCAACAGAAAAA	#N/A	#N/A	#N/A	#N/A	#N/A
hsa-mir-181a-2	MI0000269	Chr9	124692442	124692551	+	AGAAGGGCUAUCAGGCCAGCCUUCAGAGGACUCCAAGGAACAUUCAACGCUGUCGGUGAGUUUGGGAUUUGAAAAAACCACUGACCGUUGACUGUACCUUGGGGUCCUUA	1.09357	11.4456	12.3524	0.000440427	0.00505127
hsa-mir-181b-2	MI0000683	Chr9	124693710	124693798	+	CUGAUGGCUGCACUCAACAUUCAUUGCUGUCGGUGGGUUUGAGUCUGAAUCAACUCACUGAUCAAUGAAUGCAAACUGCGGACCAAACA	1.96165	8.43999	32.2047	1.38755e-08	4.38602e-07
hsa-mir-3960	MI0016964	Chr9	127785833	127785923	+	GGCGCCCCGGCUCCCCGCGCCCCCGAUCGGGGCCGCCGCUAGUAGUGGCGGCGGCGGAGGCGGGGGCAGCGGCGGCGGCGGCGGAGGCGCC	#N/A	#N/A	#N/A	#N/A	#N/A
hsa-mir-2861	MI0013006	Chr9	127785918	127786007	+	GGCGCCUCUGCAGCUCCGGCUCCCCCUGGCCUCUCGGGAACUACAAGUCCCAGGGGGCCUGGCGGUGGGCGGCGGGCGGAAGAGGCGGGG	#N/A	#N/A	#N/A	#N/A	#N/A
hsa-mir-3154	MI0014182	Chr9	128244947	128245030	-	GGCCCCUCCUUCUCAGCCCCAGCUCCCGCUCACCCCUGCCACGUCAAAGGAGGCAGAAGGGGAGUUGGGAGCAGAGAGGGGACC	#N/A	#N/A	#N/A	#N/A	#N/A
hsa-mir-199b	MI0000282	Chr9	128244721	128244830	-	CCAGAGGACACCUCCACUCCGUCUACCCAGUGUUUAGACUAUCUGUUCAGGACUCCCAAAUUGUACAGUAGUCUGCACAUUGGUUAGGCUGGGCUGGGUUAGACCCUCGG	#N/A	#N/A	#N/A	#N/A	#N/A
hsa-mir-219b	MI0017299	Chr9	128392621	128392708	+	GGAGCUCAGCCACAGAUGUCCAGCCACAAUUCUCGGUUGGCCGCAGACUCGUACAAGAAUUGCGUUUGGACAAUCAGUGGCGAAGCCC	#N/A	#N/A	#N/A	#N/A	#N/A
hsa-mir-219a-2	MI0000740	Chr9	128392618	128392714	-	ACUCAGGGGCUUCGCCACUGAUUGUCCAAACGCAAUUCUUGUACGAGUCUGCGGCCAACCGAGAAUUGUGGCUGGACAUCUGUGGCUGAGCUCCGGG	#N/A	#N/A	#N/A	#N/A	#N/A
hsa-mir-222	MI0000299	ChrX	45747015	45747124	-	GCUGCUGGAAGGUGUAGGUACCCUCAAUGGCUCAGUAGCCAGUGUAGAUCCUGUCUUUCGUAAUCAGCAGCUACAUCUGGCUACUGGGUCUCUGAUGGCAUCUUCUAGCU	1.90049	5.41408	31.0779	2.47871e-08	7.1387e-07
hsa-mir-221	MI0000298	ChrX	45746157	45746266	-	UGAACAUCCAGGUCUGGGGCAUGAACCUGGCAUACAAUGUAGAUUUCUGUGUUCGUUAGGCAACAGCUACAUUGUCUGCUGGGUUUCAGGCUACCUGGAAACAUGUUCUC	1.7152	7.28949	26.3761	2.80989e-07	6.74374e-06
hsa-mir-6894	MI0022741	ChrX	53198889	53198945	-	CAAGAAGGAGGAUGGAGAGCUGGGCCAGACAUGCUCUUGCCUGCCCUCUUCCUCCAG	#N/A	#N/A	#N/A	#N/A	#N/A
hsa-mir-6895	MI0022742	ChrX	53195411	53195488	-	CAGCUCAGGGCCAGGCACAGAGUAAGCAUCAAUAGCAUUGGCAAGUUGAACUGAGCUGUCUCUCGCCCUUGGCCUUAG	#N/A	#N/A	#N/A	#N/A	#N/A
hsa-let-7f-2	MI0000068	ChrX	53557192	53557274	-	UGUGGGAUGAGGUAGUAGAUUGUAUAGUUUUAGGGUCAUACCCCAUCUUGGAGAUAACUAUACAGUCUACUGUCUUUCCCACG	#N/A	#N/A	#N/A	#N/A	#N/A
hsa-mir-98	MI0000100	ChrX	53556223	53556341	-	AGGAUUCUGCUCAUGCCAGGGUGAGGUAGUAAGUUGUAUUGUUGUGGGGUAGGGAUAUUAGGCCCCAAUUAGAAGAUAACUAUACAACUUACUACUUUCCCUGGUGUGUGGCAUAUUCA	#N/A	#N/A	#N/A	#N/A	#N/A
hsa-mir-4536-1	MI0016906	ChrX	55451495	55451582	-	AUGUGGUAGAUAUAUGCACGAUAUAUAUACUGCCCUGCUUUUAUACAUACAUACAUACAUACCUAUAUCGUGCAUAUAUCUACCACAU	#N/A	#N/A	#N/A	#N/A	#N/A
hsa-mir-4536-2	MI0019149	ChrX	55451495	55451582	+	AUGUGGUAGAUAUAUGCACGAUAUAGGUAUGUAUGUAUGUAUGUAUAAAAGCAGGGCAGUAUAUAUAUCGUGCAUAUAUCUACCACAU	#N/A	#N/A	#N/A	#N/A	#N/A
hsa-mir-374a	MI0000782	ChrX	74287286	74287357	-	UACAUCGGCCAUUAUAAUACAACCUGAUAAGUGUUAUAGCACUUAUCAGAUUGUAUUGUAAUUGUCUGUGUA	#N/A	#N/A	#N/A	#N/A	#N/A
hsa-mir-545	MI0003516	ChrX	74287104	74287209	-	CCCAGCCUGGCACAUUAGUAGGCCUCAGUAAAUGUUUAUUAGAUGAAUAAAUGAAUGACUCAUCAGCAAACAUUUAUUGUGUGCCUGCUAAAGUGAGCUCCACAGG	#N/A	#N/A	#N/A	#N/A	#N/A
hsa-mir-1912	MI0008333	ChrX	114651544	114651623	+	CUCUAGGAUGUGCUCAUUGCAUGGGCUGUGUAUAGUAUUAUUCAAUACCCAGAGCAUGCAGUGUGAACAUAAUAGAGAUU	#N/A	#N/A	#N/A	#N/A	#N/A
hsa-mir-1264	MI0003758	ChrX	114652655	114652723	+	AGGUCCUCAAUAAGUAUUUGUUGAAAGAAUAAAUAAACCAACAAGUCUUAUUUGAGCACCUGUUAUGUG	#N/A	#N/A	#N/A	#N/A	#N/A
hsa-mir-513b	MI0006648	ChrX	147199044	147199127	-	GUGUACAGUGCCUUUCACAAGGAGGUGUCAUUUAUGUGAACUAAAAUAUAAAUGUCACCUUUUUGAGAGGAGUAAUGUACAGCA	#N/A	#N/A	#N/A	#N/A	#N/A
hsa-mir-513c	MI0006649	ChrX	147189704	147189787	-	GCGUACAGUGCCUUUCUCAAGGAGGUGUCGUUUAUGUGAACUAAAAUAUAAAUUUCACCUUUCUGAGAAGAGUAAUGUACAGCA	#N/A	#N/A	#N/A	#N/A	#N/A
hsa-mir-452	MI0001733	ChrX	151959628	151959712	-	GCUAAGCACUUACAACUGUUUGCAGAGGAAACUGAGACUUUGUAACUAUGUCUCAGUCUCAUCUGCAAAGAAGUAAGUGCUUUGC	#N/A	#N/A	#N/A	#N/A	#N/A
hsa-mir-224	MI0000301	ChrX	151958578	151958658	-	GGGCUUUCAAGUCACUAGUGGUUCCGUUUAGUAGAUGAUUGUGCAUUGUUUCAAAAUGGUGCCCUAGUGACUACAAAGCCC	#N/A	#N/A	#N/A	#N/A	#N/A
hsa-mir-3202-1	MI0014252	ChrX	153981097	153981177	+	UAUUAAUAUGGAAGGGAGAAGAGCUUUAAUGAUUGGAGUCAUUUUCAGAGCAUUAAAGCUCUUCUCCCUUCCAUAUUAAUG	#N/A	#N/A	#N/A	#N/A	#N/A
hsa-mir-3202-2	MI0014253	ChrX	153981098	153981176	-	AUUAAUAUGGAAGGGAGAAGAGCUUUAAUGCUCUGAAAAUGACUCCAAUCAUUAAAGCUCUUCUCCCUUCCAUAUUAAU	#N/A	#N/A	#N/A	#N/A	#N/A

## Sheet: COAD
ID	Accession	Chromosome	Start	End	Strand	Sequence	logFC	logCPM	LR	PValue	FDR
hsa-mir-512-1	MI0003140	Chr19	53666679	53666762	+	UCUCAGUCUGUGGCACUCAGCCUUGAGGGCACUUUCUGGUGCCAGAAUGAAAGUGCUGUCAUAGCUGAGGUCCAAUGACUGAGG	#N/A	#N/A	#N/A	#N/A	#N/A
hsa-mir-512-2	MI0003141	Chr19	53669157	53669254	+	GGUACUUCUCAGUCUGUGGCACUCAGCCUUGAGGGCACUUUCUGGUGCCAGAAUGAAAGUGCUGUCAUAGCUGAGGUCCAAUGACUGAGGCGAGCACC	#N/A	#N/A	#N/A	#N/A	#N/A
hsa-mir-520d	MI0003164	Chr19	53720096	53720182	+	UCUCAAGCUGUGAGUCUACAAAGGGAAGCCCUUUCUGUUGUCUAAAAGAAAAGAAAGUGCUUCUCUUUGGUGGGUUACGGUUUGAGA	#N/A	#N/A	#N/A	#N/A	#N/A
hsa-mir-516b-2	MI0003167	Chr19	53725442	53725526	+	UCUCAUGAUGUGACCAUCUGGAGGUAAGAAGCACUUUGUGUUUUGUGAAAGAAAGUGCUUCCUUUCAGAGGGUUACUCUUUGAGA	#N/A	#N/A	#N/A	#N/A	#N/A
hsa-mir-526a-2	MI0003168	Chr19	53726922	53726986	+	GUGACCCUCUAGAGGGAAGCACUUUCUGUUGAAAGAAAAGAACAUGCAUCCUUUCAGAGGGUUAC	#N/A	#N/A	#N/A	#N/A	#N/A
hsa-mir-518a-1	MI0003170	Chr19	53731006	53731090	+	UCUCAAGCUGUGACUGCAAAGGGAAGCCCUUUCUGUUGUCUGAAAGAAGAGAAAGCGCUUCCCUUUGCUGGAUUACGGUUUGAGA	#N/A	#N/A	#N/A	#N/A	#N/A
hsa-mir-518d	MI0003171	Chr19	53734877	53734963	+	UCCCAUGCUGUGACCCUCUAGAGGGAAGCACUUUCUGUUGUCUGAAAGAAACCAAAGCGCUUCCCUUUGGAGCGUUACGGUUUGAGA	#N/A	#N/A	#N/A	#N/A	#N/A
hsa-mir-516b-1	MI0003172	Chr19	53736845	53736934	+	UCUCAGGCUGUGACCAUCUGGAGGUAAGAAGCACUUUCUGUUUUGUGAAAGAAAAGAAAGUGCUUCCUUUCAGAGGGUUACUCUUUGAGA	#N/A	#N/A	#N/A	#N/A	#N/A
hsa-mir-518a-2	MI0003173	Chr19	53739333	53739419	+	UCUCAAGCUGUGGGUCUGCAAAGGGAAGCCCUUUCUGUUGUCUAAAAGAAGAGAAAGCGCUUCCCUUUGCUGGAUUACGGUUUGAGA	#N/A	#N/A	#N/A	#N/A	#N/A
hsa-mir-521-1	MI0003176	Chr19	53748636	53748722	+	UCUCAGGCUGUGACCCUCCAAAGGGAAGAACUUUCUGUUGUCUAAAAGAAAAGAACGCACUUCCCUUUAGAGUGUUACCGUGUGAGA	#N/A	#N/A	#N/A	#N/A	#N/A
hsa-mir-517a	MI0003161	Chr19	53712268	53712354	+	UCUCAGGCAGUGACCCUCUAGAUGGAAGCACUGUCUGUUGUAUAAAAGAAAAGAUCGUGCAUCCCUUUAGAGUGUUACUGUUUGAGA	#N/A	#N/A	#N/A	#N/A	#N/A
hsa-mir-517b	MI0003165	Chr19	53721076	53721142	+	GUGACCCUCUAGAUGGAAGCACUGUCUGUUGUCUAAGAAAAGAUCGUGCAUCCCUUUAGAGUGUUAC	#N/A	#N/A	#N/A	#N/A	#N/A
hsa-mir-526b	MI0003150	Chr19	53694393	53694475	+	UCAGGCUGUGACCCUCUUGAGGGAAGCACUUUCUGUUGUCUGAAAGAAGAGAAAGUGCUUCCUUUUAGAGGCUUACUGUCUGA	#N/A	#N/A	#N/A	#N/A	#N/A
hsa-mir-517c	MI0003174	Chr19	53741313	53741407	+	GAAGAUCUCAGGCAGUGACCCUCUAGAUGGAAGCACUGUCUGUUGUCUAAGAAAAGAUCGUGCAUCCUUUUAGAGUGUUACUGUUUGAGAAAAUC	#N/A	#N/A	#N/A	#N/A	#N/A
hsa-mir-524	MI0003160	Chr19	53711002	53711088	+	UCUCAUGCUGUGACCCUACAAAGGGAAGCACUUUCUCUUGUCCAAAGGAAAAGAAGGCGCUUCCCUUUGGAGUGUUACGGUUUGAGA	#N/A	#N/A	#N/A	#N/A	#N/A
hsa-mir-518e	MI0003169	Chr19	53729838	53729925	+	UCUCAGGCUGUGACCCUCUAGAGGGAAGCGCUUUCUGUUGGCUAAAAGAAAAGAAAGCGCUUCCCUUCAGAGUGUUAACGCUUUGAGA	#N/A	#N/A	#N/A	#N/A	#N/A
hsa-mir-519d	MI0003162	Chr19	53713347	53713434	+	UCCCAUGCUGUGACCCUCCAAAGGGAAGCGCUUUCUGUUUGUUUUCUCUUAAACAAAGUGCCUCCCUUUAGAGUGUUACCGUUUGGGA	#N/A	#N/A	#N/A	#N/A	#N/A
hsa-mir-523	MI0003153	Chr19	53698385	53698471	+	UCUCAUGCUGUGACCCUCUAGAGGGAAGCGCUUUCUGUUGUCUGAAAGAAAAGAACGCGCUUCCCUAUAGAGGGUUACCCUUUGAGA	#N/A	#N/A	#N/A	#N/A	#N/A
hsa-mir-520f	MI0003146	Chr19	53682159	53682245	+	UCUCAGGCUGUGACCCUCUAAAGGGAAGCGCUUUCUGUGGUCAGAAAGAAAAGCAAGUGCUUCCUUUUAGAGGGUUACCGUUUGGGA	#N/A	#N/A	#N/A	#N/A	#N/A
hsa-mir-520a	MI0003149	Chr19	53690881	53690965	+	CUCAGGCUGUGACCCUCCAGAGGGAAGUACUUUCUGUUGUCUGAGAGAAAAGAAAGUGCUUCCCUUUGGACUGUUUCGGUUUGAG	#N/A	#N/A	#N/A	#N/A	#N/A
hsa-mir-518c	MI0003159	Chr19	53708735	53708835	+	GCGAGAAGAUCUCAUGCUGUGACUCUCUGGAGGGAAGCACUUUCUGUUGUCUGAAAGAAAACAAAGCGCUUCUCUUUAGAGUGUUACGGUUUGAGAAAAGC	#N/A	#N/A	#N/A	#N/A	#N/A
hsa-mir-520c	MI0003158	Chr19	53707453	53707539	+	UCUCAGGCUGUCGUCCUCUAGAGGGAAGCACUUUCUGUUGUCUGAAAGAAAAGAAAGUGCUUCCUUUUAGAGGGUUACCGUUUGAGA	#N/A	#N/A	#N/A	#N/A	#N/A
hsa-mir-518f	MI0003154	Chr19	53700015	53700101	+	UCUCAUGCUGUGACCCUCUAGAGGGAAGCACUUUCUCUUGUCUAAAAGAAAAGAAAGCGCUUCUCUUUAGAGGAUUACUCUUUGAGA	#N/A	#N/A	#N/A	#N/A	#N/A
hsa-mir-518b	MI0003156	Chr19	53702737	53702819	+	UCAUGCUGUGGCCCUCCAGAGGGAAGCGCUUUCUGUUGUCUGAAAGAAAACAAAGCGCUCCCCUUUAGAGGUUUACGGUUUGA	#N/A	#N/A	#N/A	#N/A	#N/A
hsa-mir-515-1	MI0003144	Chr19	53679003	53679085	+	UCUCAUGCAGUCAUUCUCCAAAAGAAAGCACUUUCUGUUGUCUGAAAGCAGAGUGCCUUCUUUUGGAGCGUUACUGUUUGAGA	#N/A	#N/A	#N/A	#N/A	#N/A
hsa-mir-515-2	MI0003147	Chr19	53685009	53685091	+	UCUCAUGCAGUCAUUCUCCAAAAGAAAGCACUUUCUGUUGUCUGAAAGCAGAGUGCCUUCUUUUGGAGCGUUACUGUUUGAGA	#N/A	#N/A	#N/A	#N/A	#N/A
hsa-mir-1323	MI0003786	Chr19	53671968	53672040	+	ACUGAGGUCCUCAAAACUGAGGGGCAUUUUCUGUGGUUUGAAAGGAAAGUGCACCCAGUUUUGGGGAUGUCAA	#N/A	#N/A	#N/A	#N/A	#N/A
hsa-mir-525	MI0003152	Chr19	53697533	53697617	+	CUCAAGCUGUGACUCUCCAGAGGGAUGCACUUUCUCUUAUGUGAAAAAAAAGAAGGCGCUUCCCUUUAGAGCGUUACGGUUUGGG	#N/A	#N/A	#N/A	#N/A	#N/A
hsa-mir-519b	MI0003151	Chr19	53695213	53695293	+	CAUGCUGUGACCCUCUAGAGGGAAGCGCUUUCUGUUGUCUGAAAGAAAAGAAAGUGCAUCCUUUUAGAGGUUUACUGUUUG	#N/A	#N/A	#N/A	#N/A	#N/A
hsa-mir-522	MI0003177	Chr19	53751211	53751297	+	UCUCAGGCUGUGUCCCUCUAGAGGGAAGCGCUUUCUGUUGUCUGAAAGAAAAGAAAAUGGUUCCCUUUAGAGUGUUACGCUUUGAGA	#N/A	#N/A	#N/A	#N/A	#N/A
hsa-mir-519a-2	MI0003182	Chr19	53762344	53762430	+	UCUCAGGCUGUGUCCCUCUACAGGGAAGCGCUUUCUGUUGUCUGAAAGAAAGGAAAGUGCAUCCUUUUAGAGUGUUACUGUUUGAGA	#N/A	#N/A	#N/A	#N/A	#N/A
hsa-mir-520b	MI0003155	Chr19	53701227	53701287	+	CCCUCUACAGGGAAGCGCUUUCUGUUGUCUGAAAGAAAAGAAAGUGCUUCCUUUUAGAGGG	#N/A	#N/A	#N/A	#N/A	#N/A
hsa-mir-519e	MI0003145	Chr19	53679940	53680023	+	UCUCAUGCAGUCAUUCUCCAAAAGGGAGCACUUUCUGUUUGAAAGAAAACAAAGUGCCUCCUUUUAGAGUGUUACUGUUUGAGA	#N/A	#N/A	#N/A	#N/A	#N/A
hsa-mir-519a-1	MI0003178	Chr19	53752397	53752481	+	CUCAGGCUGUGACACUCUAGAGGGAAGCGCUUUCUGUUGUCUGAAAGAAAGGAAAGUGCAUCCUUUUAGAGUGUUACUGUUUGAG	#N/A	#N/A	#N/A	#N/A	#N/A
hsa-mir-521-2	MI0003163	Chr19	53716594	53716680	+	UCUCGGGCUGUGACUCUCCAAAGGGAAGAAUUUUCUCUUGUCUAAAAGAAAAGAACGCACUUCCCUUUAGAGUGUUACCGUGUGAGA	#N/A	#N/A	#N/A	#N/A	#N/A
hsa-mir-519c	MI0003148	Chr19	53686469	53686555	+	UCUCAGCCUGUGACCCUCUAGAGGGAAGCGCUUUCUGUUGUCUGAAAGAAAAGAAAGUGCAUCUUUUUAGAGGAUUACAGUUUGAGA	#N/A	#N/A	#N/A	#N/A	#N/A
hsa-mir-520g	MI0003166	Chr19	53722166	53722255	+	UCCCAUGCUGUGACCCUCUAGAGGAAGCACUUUCUGUUUGUUGUCUGAGAAAAAACAAAGUGCUUCCCUUUAGAGUGUUACCGUUUGGGA	#N/A	#N/A	#N/A	#N/A	#N/A
hsa-mir-520h	MI0003175	Chr19	53742512	53742599	+	UCCCAUGCUGUGACCCUCUAGAGGAAGCACUUUCUGUUUGUUGUCUGAGAAAAAACAAAGUGCUUCCCUUUAGAGUUACUGUUUGGGA	#N/A	#N/A	#N/A	#N/A	#N/A
hsa-mir-526a-1	MI0003157	Chr19	53706252	53706336	+	CUCAGGCUGUGACCCUCUAGAGGGAAGCACUUUCUGUUGCUUGAAAGAAGAGAAAGCGCUUCCUUUUAGAGGAUUACUCUUUGAG	#N/A	#N/A	#N/A	#N/A	#N/A
hsa-mir-527	MI0003179	Chr19	53754018	53754102	+	UCUCAAGCUGUGACUGCAAAGGGAAGCCCUUUCUGUUGUCUAAAAGAAAAGAAAGUGCUUCCCUUUGGUGAAUUACGGUUUGAGA	#N/A	#N/A	#N/A	#N/A	#N/A
hsa-mir-516a-1	MI0003180	Chr19	53756741	53756830	+	UCUCAGGCUGUGACCUUCUCGAGGAAAGAAGCACUUUCUGUUGUCUGAAAGAAAAGAAAGUGCUUCCUUUCAGAGGGUUACGGUUUGAGA	#N/A	#N/A	#N/A	#N/A	#N/A
hsa-mir-516a-2	MI0003181	Chr19	53761133	53761222	+	UCUCAGGUUGUGACCUUCUCGAGGAAAGAAGCACUUUCUGUUGUCUGAAAGAAAAGAAAGUGCUUCCUUUCAGAGGGUUACGGUUUGAGA	#N/A	#N/A	#N/A	#N/A	#N/A
hsa-mir-520e	MI0003143	Chr19	53675711	53675797	+	UCUCCUGCUGUGACCCUCAAGAUGGAAGCAGUUUCUGUUGUCUGAAAGGAAAGAAAGUGCUUCCUUUUUGAGGGUUACUGUUUGAGA	#N/A	#N/A	#N/A	#N/A	#N/A
hsa-mir-498	MI0003142	Chr19	53674197	53674320	+	AACCCUCCUUGGGAAGUGAAGCUCAGGCUGUGAUUUCAAGCCAGGGGGCGUUUUUCUAUAACUGGAUGAAAAGCACCUCCAGAGCUUGAAGCUCACAGUUUGAGAGCAAUCGUCUAAGGAAGUU	#N/A	#N/A	#N/A	#N/A	#N/A
hsa-mir-1283-2	MI0006430	Chr19	53758232	53758318	+	CUCAAGCUGUGAGUCUACAAAGGAAAGCGCUUUCUGUUGUCUGAAAGAAAAGAAAUCGCUUCCCUUUGGAGUGUUACGGUUUGAGAA	#N/A	#N/A	#N/A	#N/A	#N/A
hsa-mir-1283-1	MI0003832	Chr19	53688481	53688567	+	CUCAAGCUAUGAGUCUACAAAGGAAAGCGCUUUCUGUUGUCAGAAAGAAGAGAAAGCGCUUCCCUUUUGAGGGUUACGGUUUGAGAA	#N/A	#N/A	#N/A	#N/A	#N/A
hsa-mir-379	MI0000787	Chr14	101022066	101022132	+	AGAGAUGGUAGACUAUGGAACGUAGGCGUUAUGAUUUCUGACCUAUGUAACAUGGUCCACUAACUCU	3.96188	9.62464	103.371	2.77937e-24	5.56667e-23
hsa-mir-411	MI0003675	Chr14	101023325	101023420	+	UGGUACUUGGAGAGAUAGUAGACCGUAUAGCGUACGCUUUAUCUGUGACGUAUGUAACACGGUCCACUAACCCUCAGUAUCAAAUCCAUCCCCGAG	4.12318	3.15568	37.8545	7.62218e-10	5.5084e-09
hsa-mir-299	MI0000744	Chr14	101023794	101023856	+	AAGAAAUGGUUUACCGUCCCACAUACAUUUUGAAUAUGUAUGUGGGAUGGUAAACCGCUUCUU	#N/A	#N/A	#N/A	#N/A	#N/A
hsa-mir-380	MI0000788	Chr14	101025017	101025077	+	AAGAUGGUUGACCAUAGAACAUGCGCUAUCUCUGUGUCGUAUGUAAUAUGGUCCACAUCUU	4.6721	0.442742	9.41366	0.00215374	0.00686261
hsa-mir-1197	MI0006656	Chr14	101025564	101025651	+	ACUUCCUGGUAUUUGAAGAUGCGGUUGACCAUGGUGUGUACGCUUUAUUUGUGACGUAGGACACAUGGUCUACUUCUUCUCAAUAUCA	#N/A	#N/A	#N/A	#N/A	#N/A
hsa-mir-323a	MI0000807	Chr14	101025732	101025817	+	UUGGUACUUGGAGAGAGGUGGUCCGUGGCGCGUUCGCUUUAUUUAUGGCGCACAUUACACGGUCGACCUCUUUGCAGUAUCUAAUC	-1.87202	2.24899	29.1046	6.8573e-08	4.17997e-07
hsa-mir-758	MI0003757	Chr14	101026020	101026107	+	GCCUGGAUACAUGAGAUGGUUGACCAGAGAGCACACGCUUUAUUUGUGCCGUUUGUGACCUGGUCCACUAACCCUCAGUAUCUAAUGC	#N/A	#N/A	#N/A	#N/A	#N/A
hsa-mir-329-1	MI0001725	Chr14	101026785	101026864	+	GGUACCUGAAGAGAGGUUUUCUGGGUUUCUGUUUCUUUAAUGAGGACGAAACACACCUGGUUAACCUCUUUUCCAGUAUC	#N/A	#N/A	#N/A	#N/A	#N/A
hsa-mir-329-2	MI0001726	Chr14	101027100	101027183	+	GUGGUACCUGAAGAGAGGUUUUCUGGGUUUCUGUUUCUUUAUUGAGGACGAAACACACCUGGUUAACCUCUUUUCCAGUAUCAA	#N/A	#N/A	#N/A	#N/A	#N/A
hsa-mir-494	MI0003134	Chr14	101029634	101029714	+	GAUACUCGAAGGAGAGGUUGUCCGUGUUGUCUUCUCUUUAUUUAUGAUGAAACAUACACGGGAAACCUCUUUUUUAGUAUC	3.23545	1.18336	11.5793	0.00066691	0.00234338
hsa-mir-1193	MI0014205	Chr14	101030052	101030129	+	GUAGCUGAGGGGAUGGUAGACCGGUGACGUGCACUUCAUUUACGAUGUAGGUCACCCGUUUGACUAUCCACCAGCGCC	#N/A	#N/A	#N/A	#N/A	#N/A
hsa-mir-543	MI0005565	Chr14	101031987	101032064	+	UACUUAAUGAGAAGUUGCCCGUGUUUUUUUCGCUUUAUUUGUGACGAAACAUUCGCGGUGCACUUCUUUUUCAGUAUC	-1.12803	1.00566	6.75398	0.00935387	0.0264932
hsa-mir-495	MI0003135	Chr14	101033755	101033836	+	UGGUACCUGAAAAGAAGUUGCCCAUGUUAUUUUCGCUUUAUAUGUGACGAAACAAACAUGGUGCACUUCUUUUUCGGUAUCA	3.34906	2.86019	33.0242	9.10177e-09	5.96294e-08
hsa-mir-376c	MI0000776	Chr14	101039690	101039755	+	AAAAGGUGGAUAUUCCUUCUAUGUUUAUGUUAUUUAUGGUUAAACAUAGAGGAAAUUCCACGUUUU	5.04615	2.74213	34.7357	3.77641e-09	2.60814e-08
hsa-mir-376a-2	MI0003529	Chr14	101040069	101040148	+	GGUAUUUAAAAGGUAGAUUUUCCUUCUAUGGUUACGUGUUUGAUGGUUAAUCAUAGAGGAAAAUCCACGUUUUCAGUAUC	4.66961	0.476756	8.85468	0.00292339	0.0090079
hsa-mir-654	MI0003676	Chr14	101040219	101040299	+	GGGUAAGUGGAAAGAUGGUGGGCCGCAGAACAUGUGCUGAGUUCGUGCCAUAUGUCUGCUGACCAUCACCUUUAGAAGCCC	#N/A	#N/A	#N/A	#N/A	#N/A
hsa-mir-376b	MI0002466	Chr14	101040436	101040535	+	CAGUCCUUCUUUGGUAUUUAAAACGUGGAUAUUCCUUCUAUGUUUACGUGAUUCCUGGUUAAUCAUAGAGGAAAAUCCAUGUUUUCAGUAUCAAAUGCUG	3.3992	1.32154	12.154	0.000489815	0.00178369
hsa-mir-376a-1	MI0000784	Chr14	101040782	101040849	+	UAAAAGGUAGAUUCUCCUUCUAUGAGUACAUUAUUUAUGAUUAAUCAUAGAGGAAAAUCCACGUUUUC	5.68744	1.19566	16.4484	4.99927e-05	0.000213039
hsa-mir-300	MI0005525	Chr14	101041363	101041445	+	UGCUACUUGAAGAGAGGUAAUCCUUCACGCAUUUGCUUUACUUGCAAUGAUUAUACAAGGGCAGACUCUCUCUGGGGAGCAAA	#N/A	#N/A	#N/A	#N/A	#N/A
hsa-mir-1185-1	MI0003844	Chr14	101042977	101043062	+	UUUGGUACUUGAAGAGAGGAUACCCUUUGUAUGUUCACUUGAUUAAUGGCGAAUAUACAGGGGGAGACUCUUAUUUGCGUAUCAAA	#N/A	#N/A	#N/A	#N/A	#N/A
hsa-mir-1185-2	MI0003821	Chr14	101044198	101044283	+	UUUGGUACUUAAAGAGAGGAUACCCUUUGUAUGUUCACUUGAUUAAUGGCGAAUAUACAGGGGGAGACUCUCAUUUGCGUAUCAAA	#N/A	#N/A	#N/A	#N/A	#N/A
hsa-mir-381	MI0000789	Chr14	101045920	101045994	+	UACUUAAAGCGAGGUUGCCCUUUGUAUAUUCGGUUUAUUGACAUGGAAUAUACAAGGGCAAGCUCUCUGUGAGUA	#N/A	#N/A	#N/A	#N/A	#N/A
hsa-mir-487b	MI0003530	Chr14	101046455	101046538	+	UUGGUACUUGGAGAGUGGUUAUCCCUGUCCUGUUCGUUUUGCUCAUGUCGAAUCGUACAGGGUCAUCCACUUUUUCAGUAUCAA	#N/A	#N/A	#N/A	#N/A	#N/A
hsa-mir-539	MI0003514	Chr14	101047321	101047398	+	AUACUUGAGGAGAAAUUAUCCUUGGUGUGUUCGCUUUAUUUAUGAUGAAUCAUACAAGGACAAUUUCUUUUUGAGUAU	#N/A	#N/A	#N/A	#N/A	#N/A
hsa-mir-889	MI0005540	Chr14	101047901	101047979	+	GUGCUUAAAGAAUGGCUGUCCGUAGUAUGGUCUCUAUAUUUAUGAUGAUUAAUAUCGGACAACCAUUGUUUUAGUAUCC	5.51782	4.03048	79.4979	4.82749e-19	7.27757e-18
hsa-mir-544a	MI0003515	Chr14	101048658	101048748	+	AUUUUCAUCACCUAGGGAUCUUGUUAAAAAGCAGAUUCUGAUUCAGGGACCAAGAUUCUGCAUUUUUAGCAAGUUCUCAAGUGAUGCUAAU	#N/A	#N/A	#N/A	#N/A	#N/A
hsa-mir-655	MI0003677	Chr14	101049550	101049646	+	AACUAUGCAAGGAUAUUUGAGGAGAGGUUAUCCGUGUUAUGUUCGCUUCAUUCAUCAUGAAUAAUACAUGGUUAACCUCUUUUUGAAUAUCAGACUC	3.45658	1.34275	14.0118	0.000181665	0.000711435
hsa-mir-487a	MI0002471	Chr14	101052446	101052525	+	GGUACUUGAAGAGUGGUUAUCCCUGCUGUGUUCGCUUAAUUUAUGACGAAUCAUACAGGGACAUCCAGUUUUUCAGUAUC	-2.55014	1.04521	53.4822	2.60949e-13	2.52311e-12
hsa-mir-382	MI0000790	Chr14	101054306	101054381	+	UACUUGAAGAGAAGUUGUUCGUGGUGGAUUCGCUUUACUUAUGACGAAUCAUUCACGGACAACACUUUUUUCAGUA	#N/A	#N/A	#N/A	#N/A	#N/A
hsa-mir-134	MI0000474	Chr14	101054687	101054759	+	CAGGGUGUGUGACUGGUUGACCAGAGGGGCAUGCACUGUGUUCACCCUGUGGGCCACCUAGUCACCAACCCUC	#N/A	#N/A	#N/A	#N/A	#N/A
hsa-mir-668	MI0003761	Chr14	101055258	101055323	+	GGUAAGUGCGCCUCGGGUGAGCAUGCACUUAAUGUGGGUGUAUGUCACUCGGCUCGGCCCACUACC	-2.67902	-0.678079	8.73432	0.00312275	0.00958009
hsa-mir-485	MI0002469	Chr14	101055419	101055491	+	ACUUGGAGAGAGGCUGGCCGUGAUGAAUUCGAUUCAUCAAAGCGAGUCAUACACGGCUCUCCUCUCUUUUAGU	-3.24831	2.08369	134.379	4.51515e-31	1.19438e-29
hsa-mir-323b	MI0014206	Chr14	101056219	101056300	+	UGGUACUCGGAGGGAGGUUGUCCGUGGUGAGUUCGCAUUAUUUAAUGAUGCCCAAUACACGGUCGACCUCUUUUCGGUAUCA	#N/A	#N/A	#N/A	#N/A	#N/A
hsa-mir-154	MI0000480	Chr14	101059755	101059838	+	GUGGUACUUGAAGAUAGGUUAUCCGUGUUGCCUUCGCUUUAUUUGUGACGAAUCAUACACGGUUGACCUAUUUUUCAGUACCAA	#N/A	#N/A	#N/A	#N/A	#N/A
hsa-mir-496	MI0003136	Chr14	101060573	101060674	+	CCCAAGUCAGGUACUCGAAUGGAGGUUGUCCAUGGUGUGUUCAUUUUAUUUAUGAUGAGUAUUACAUGGCCAAUCUCCUUUCGGUACUCAAUUCUUCUUGGG	2.93508	1.6639	14.2819	0.000157369	0.000626792
hsa-mir-377	MI0000785	Chr14	101062050	101062118	+	UUGAGCAGAGGUUGCCCUUGGUGAAUUCGCUUUAUUUAUGUUGAAUCACACAAAGGCAACUUUUGUUUG	-1.34675	2.18281	14.3772	0.000149601	0.000597553
hsa-mir-541	MI0005539	Chr14	101064495	101064578	+	ACGUCAGGGAAAGGAUUCUGCUGUCGGUCCCACUCCAAAGUUCACAGAAUGGGUGGUGGGCACAGAAUCUGGACUCUGCUUGUG	#N/A	#N/A	#N/A	#N/A	#N/A
hsa-mir-409	MI0001735	Chr14	101065300	101065378	+	UGGUACUCGGGGAGAGGUUACCCGAGCAACUUUGCAUCUGGACGACGAAUGUUGCUCGGUGAACCCCUUUUCGGUAUCA	#N/A	#N/A	#N/A	#N/A	#N/A
hsa-mir-412	MI0002464	Chr14	101065447	101065537	+	CUGGGGUACGGGGAUGGAUGGUCGACCAGUUGGAAAGUAAUUGUUUCUAAUGUACUUCACCUGGUCCACUAGCCGUCCGUAUCCGCUGCAG	#N/A	#N/A	#N/A	#N/A	#N/A
hsa-mir-369	MI0000777	Chr14	101065598	101065667	+	UUGAAGGGAGAUCGACCGUGUUAUAUUCGCUUUAUUGACUUCGAAUAAUACAUGGUUGAUCUUUUCUCAG	3.19285	3.77013	37.9694	7.18619e-10	5.24741e-09
hsa-mir-410	MI0002465	Chr14	101065912	101065991	+	GGUACCUGAGAAGAGGUUGUCUGUGAUGAGUUCGCUUUUAUUAAUGACGAAUAUAACACAGAUGGCCUGUUUUCAGUACC	#N/A	#N/A	#N/A	#N/A	#N/A
hsa-mir-656	MI0003678	Chr14	101066724	101066801	+	CUGAAAUAGGUUGCCUGUGAGGUGUUCACUUUCUAUAUGAUGAAUAUUAUACAGUCAACCUCUUUCCGAUAUCGAAUC	4.40383	0.32046	7.67918	0.00558616	0.0163503
hsa-mir-493	MI0003132	Chr14	100869060	100869148	+	CUGGCCUCCAGGGCUUUGUACAUGGUAGGCUUUCAUUCAUUCGUUUGCACAUUCGGUGAAGGUCUACUGUGUGCCAGGCCCUGUGCCAG	1.08232	3.88024	9.7445	0.0017986	0.00582365
hsa-mir-337	MI0000806	Chr14	100874493	100874585	+	GUAGUCAGUAGUUGGGGGGUGGGAACGGCUUCAUACAGGAGUUGAUGCACAGUUAUCCAGCUCCUAUAUGAUGCCUUUCUUCAUCCCCUUCAA	2.46966	4.75042	34.7594	3.73071e-09	2.58933e-08
hsa-mir-665	MI0005563	Chr14	100875033	100875104	+	UCUCCUCGAGGGGUCUCUGCCUCUACCCAGGACUCUUUCAUGACCAGGAGGCUGAGGCCCCUCACAGGCGGC	#N/A	#N/A	#N/A	#N/A	#N/A
hsa-mir-431	MI0001721	Chr14	100881007	100881120	+	UCCUGCUUGUCCUGCGAGGUGUCUUGCAGGCCGUCAUGCAGGCCACACUGACGGUAACGUUGCAGGUCGUCUUGCAGGGCUUCUCGCAAGACGACAUCCUCAUCACCAACGACG	-1.79806	3.5634	43.9157	3.42828e-11	2.86098e-10
hsa-mir-433	MI0001723	Chr14	100881886	100881978	+	CCGGGGAGAAGUACGGUGAGCCUGUCAUUAUUCAGAGAGGCUAGAUCCUCUGUGUUGAGAAGGAUCAUGAUGGGCUCCUCGGUGUUCUCCAGG	-3.57404	1.06875	141.28	1.39754e-32	4.08199e-31
hsa-mir-127	MI0000472	Chr14	100882979	100883075	+	UGUGAUCACUGUCUCCAGCCUGCUGAAGCUCAGAGGGCUCUGAUUCAGAAAGAUCAUCGGAUCCGUCUGAGCUUGGCUGGUCGGAAGUCUCAUCAUC	-1.47501	9.78374	41.2219	1.35889e-10	1.07637e-09
hsa-mir-432	MI0003133	Chr14	100884483	100884576	+	UGACUCCUCCAGGUCUUGGAGUAGGUCAUUGGGUGGAUCCUCUAUUUCCUUACGUGGGCCACUGGAUGGCUCCUCCAUGUCUUGGAGUAGAUCA	-2.51146	2.78241	85.3361	2.51729e-20	4.05659e-19
hsa-mir-136	MI0000475	Chr14	100884702	100884783	+	UGAGCCCUCGGAGGACUCCAUUUGUUUUGAUGAUGGAUUCUUAUGCUCCAUCAUCGUCUCAAAUGAGUCUUCAGAGGGUUCU	4.29112	5.21951	47.385	5.83271e-12	5.07917e-11
hsa-mir-532	MI0003205	ChrX	50003148	50003238	+	CGACUUGCUUUCUCUCCUCCAUGCCUUGAGUGUAGGACCGUUGGCAUCUUAAUUACCCUCCCACACCCAAGGCUUGCAGAAGAGCGAGCCU	#N/A	#N/A	#N/A	#N/A	#N/A
hsa-mir-188	MI0000484	ChrX	50003503	50003588	+	UGCUCCCUCUCUCACAUCCCUUGCAUGGUGGAGGGUGAGCUUUCUGAAAACCCCUCCCACAUGCAGGGUUUGCAGGAUGGCGAGCC	2.92289	3.20861	17.8808	2.35182e-05	0.000105008
hsa-mir-500a	MI0003184	ChrX	50008431	50008514	+	GCUCCCCCUCUCUAAUCCUUGCUACCUGGGUGAGAGUGCUGUCUGAAUGCAAUGCACCUGGGCAAGGAUUCUGAGAGCGAGAGC	#N/A	#N/A	#N/A	#N/A	#N/A
hsa-mir-362	MI0000762	ChrX	50008964	50009028	+	CUUGAAUCCUUGGAACCUAGGUGUGAGUGCUAUUUCAGUGCAACACACCUAUUCAAGGAUUCAAA	#N/A	#N/A	#N/A	#N/A	#N/A
hsa-mir-501	MI0003185	ChrX	50009722	50009805	+	GCUCUUCCUCUCUAAUCCUUUGUCCCUGGGUGAGAGUGCUUUCUGAAUGCAAUGCACCCGGGCAAGGAUUCUGAGAGGGUGAGC	-1.81751	6.02878	39.4627	3.34382e-10	2.54784e-09
hsa-mir-500b	MI0015903	ChrX	50010672	50010750	+	CCCCCUCUCUAAUCCUUGCUACCUGGGUGAGAGUGCUUUCUGAAUGCAGUGCACCCAGGCAAGGAUUCUGCAAGGGGGA	#N/A	#N/A	#N/A	#N/A	#N/A
hsa-mir-660	MI0003684	ChrX	50013241	50013337	+	CUGCUCCUUCUCCCAUACCCAUUGCAUAUCGGAGUUGUGAAUUCUCAAAACACCUCCUGUGUGCAUGGAUUACAGGAGGGUGAGCCUUGUCAUCGUG	3.74015	5.76731	52.8428	3.61334e-13	3.44619e-12
hsa-mir-502	MI0003186	ChrX	50014598	50014683	+	UGCUCCCCCUCUCUAAUCCUUGCUAUCUGGGUGCUAGUGCUGGCUCAAUGCAAUGCACCUGGGCAAGGAUUCAGAGAGGGGGAGCU	#N/A	#N/A	#N/A	#N/A	#N/A
hsa-mir-3689f	MI0016837	Chr9	134850742	134850807	-	AGGUGUGAUAUCGUGCUUCCUGGGACGUGUGAUGCUGUGCUUCCUGGGAGGUGUGAUCCCACACUC	#N/A	#N/A	#N/A	#N/A	#N/A
hsa-mir-3689e	MI0016836	Chr9	134850570	134850641	-	GGGAGGUGUGAUAUCAUGGUUCCUGGGAGGUAUGAUAUCGUGGUUCCUGGGAGGUGUGAUCCCGUGCUCCCU	#N/A	#N/A	#N/A	#N/A	#N/A
hsa-mir-3689d-2	MI0016835	Chr9	134850277	134850356	-	ACUGGGAGGUGUGAUCUCACACUCGCUGGGAGGUGUGCUAUCGUCUUCCCUGGGAGGUGUGAUCCUGUUCUUCCUGAGCG	#N/A	#N/A	#N/A	#N/A	#N/A
hsa-mir-3689b	MI0016411	Chr9	134850125	134850272	-	GAUCCUGUGCUCCCUGGGGGGUCUGAUCCUGUGCUUCCUGGGAGGUGUGAUAUCAUGGUUCCUGGGAGGUGUGAUCCCGUGCUUCCUGGGAGGUGUGAUAUUGUGGUUCCUGGGAGGUGUGAUCCCGUGCUCCCUGGGAGGUGUGAUC	#N/A	#N/A	#N/A	#N/A	#N/A
hsa-mir-3689d-1	MI0016834	Chr9	134849609	134849682	-	UGGGAGGUGUGAUCUCACACUCGCUGGGAGGUGUGCUAUCGUCUUCCCCGGGAGGUGUGAUCCUGUUCUUCCUG	#N/A	#N/A	#N/A	#N/A	#N/A
hsa-mir-3689a	MI0016090	Chr9	134849487	134849564	-	CCUGGGAGGUGUGAUAUCAUGGUUCCUGGGAGGUGUGAUCCUGUGCUUCCUGGGAGGUGUGAUAUCGUGGUUCCUGGG	#N/A	#N/A	#N/A	#N/A	#N/A
hsa-mir-3689c	MI0016832	Chr9	134849298	134849369	-	GGGAGGUGUGAUAUCGUGGUUCCUGGGAGGUGUGAUAUCGUGGUUCCUGGGAGGUGUGAUAUUGUGGUUCCU	#N/A	#N/A	#N/A	#N/A	#N/A
hsa-mir-17	MI0000071	Chr13	91350605	91350688	+	GUCAGAAUAAUGUCAAAGUGCUUACAGUGCAGGUAGUGAUAUGUGCAUCUACUGCAGUGAAGGCACUUGUAGCAUUAUGGUGAC	2.88758	10.5689	51.0361	9.06846e-13	8.36446e-12
hsa-mir-18a	MI0000072	Chr13	91350751	91350821	+	UGUUCUAAGGUGCAUCUAGUGCAGAUAGUGAAGUAGAUUAGCAUCUACUGCCCUAAGUGCUCCUUCUGGCA	1.8885	5.26131	13.5842	0.000228097	0.000880968
hsa-mir-19a	MI0000073	Chr13	91350891	91350972	+	GCAGUCCUCUGUUAGUUUUGCAUAGUUGCACUACAAGAAGAAUGUAGUUGUGCAAAUCUAUGCAAAACUGAUGGUGGCCUGC	11.015	6.14562	77.4115	1.38804e-18	1.96568e-17
hsa-mir-20a	MI0000076	Chr13	91351065	91351135	+	GUAGCACUAAAGUGCUUAUAGUGCAGGUAGUGUUUAGUUAUCUACUGCAUUAUGAGCACUUAAAGUACUGC	4.80381	9.19574	79.0713	5.99097e-19	8.93547e-18
hsa-mir-19b-1	MI0000074	Chr13	91351192	91351278	+	CACUGUUCUAUGGUUAGUUUUGCAGGUUUGCAUCCAGCUGUGUGAUAUUCUGCUGUGCAAAUCCAUGCAAAACUGACUGUGGUAGUG	6.15029	7.16593	95.9733	1.16445e-22	2.12022e-21
hsa-mir-92a-1	MI0000093	Chr13	91351314	91351391	+	CUUUCUACACAGGUUGGGAUCGGUUGCAAUGCUGUGUUUCUGUAUGGUAUUGCACUUGUCCCGGCCUGUUGAGUUUGG	-2.2275	13.4443	81.9873	1.36966e-19	2.11018e-18
hsa-mir-106a	MI0000113	ChrX	134170198	134170278	-	CCUUGGCCAUGUAAAAGUGCUUACAGUGCAGGUAGCUUUUUGAGAUCUACUGCAAUGUAAGCACUUCUUACAUUACCAUGG	3.73995	5.70417	19.1023	1.23894e-05	5.75163e-05
hsa-mir-18b	MI0001518	ChrX	134170041	134170111	-	UGUGUUAAGGUGCAUCUAGUGCAGUUAGUGAAGCAGCUUAGAAUCUACUGCCCUAAAUGCCCCUUCUGGCA	#N/A	#N/A	#N/A	#N/A	#N/A
hsa-mir-20b	MI0001519	ChrX	134169809	134169877	-	AGUACCAAAGUGCUCAUAGUGCAGGUAGUUUUGGCAUGACUCUACUGUAGUAUGGGCACUUCCAGUACU	#N/A	#N/A	#N/A	#N/A	#N/A
hsa-mir-19b-2	MI0000075	ChrX	134169671	134169766	-	ACAUUGCUACUUACAAUUAGUUUUGCAGGUUUGCAUUUCAGCGUAUAUAUGUAUAUGUGGCUGUGCAAAUCCAUGCAAAACUGAUUGUGAUAAUGU	6.82638	6.98262	96.5464	8.71774e-23	1.60819e-21
hsa-mir-92a-2	MI0000094	ChrX	134169538	134169612	-	UCAUCCCUGGGUGGGGAUUUGUUGCAUUACUUGUGUUCUAUAUAAAGUAUUGCACUUGUCCCGGCCUGUGGAAGA	-2.19083	13.331	79.7031	4.35122e-19	6.63088e-18
hsa-mir-363	MI0000764	ChrX	134169378	134169452	-	UGUUGUCGGGUGGAUCACGAUGCAAUUUUGAUGAGUAUCAUAGGAGAAAAAUUGCACGGUAUCCAUCUGUAAACC	#N/A	#N/A	#N/A	#N/A	#N/A
hsa-mir-424	MI0001446	ChrX	134546614	134546711	-	CGAGGGGAUACAGCAGCAAUUCAUGUUUUGAAGUGUUCUAAAUGGUUCAAAACGUGAGGCGCUGCUAUACCCCCUCGUGGGGAAGGUAGAAGGUGGGG	4.99375	7.25203	72.5011	1.66937e-17	2.12768e-16
hsa-mir-503	MI0003188	ChrX	134546328	134546398	-	UGCCCUAGCAGCGGGAACAGUUCUGCAGUGAGCGAUCGGUGCUCUGGGGUAUUGUUUCCGCUGCCAGGGUA	#N/A	#N/A	#N/A	#N/A	#N/A
hsa-mir-542	MI0003686	ChrX	134541341	134541437	-	CAGAUCUCAGACAUCUCGGGGAUCAUCAUGUCACGAGAUACCAGUGUGCACUUGUGACAGAUUGAUAACUGAAAGGUCUGGGAGCCACUCAUCUUCA	5.28842	7.32657	129.641	4.91028e-30	1.25167e-28
hsa-mir-450a-2	MI0003187	ChrX	134540508	134540607	-	CCAAAGAAAGAUGCUAAACUAUUUUUGCGAUGUGUUCCUAAUAUGUAAUAUAAAUGUAUUGGGGACAUUUUGCAUUCAUAGUUUUGUAUCAAUAAUAUGG	6.59072	1.92863	27.8101	1.33824e-07	7.85025e-07
hsa-mir-450a-1	MI0001652	ChrX	134540341	134540431	-	AAACGAUACUAAACUGUUUUUGCGAUGUGUUCCUAAUAUGCACUAUAAAUAUAUUGGGAACAUUUUGCAUGUAUAGUUUUGUAUCAAUAUA	6.5709	1.90901	26.8662	2.18034e-07	1.23758e-06
hsa-mir-450b	MI0005531	ChrX	134540185	134540262	-	GCAGAAUUAUUUUUGCAAUAUGUUCCUGAAUAUGUAAUAUAAGUGUAUUGGGAUCAUUUUGCAUCCAUAGUUUUGUAU	8.14796	3.34815	54.8403	1.30732e-13	1.2999e-12
hsa-mir-891b	MI0005534	ChrX	146001053	146001131	-	CCUUAAUCCUUGCAACUUACCUGAGUCAUUGAUUCAGUAAAACAUUCAAUGGCACAUGUUUGUUGUUAGGGUCAAAAGA	#N/A	#N/A	#N/A	#N/A	#N/A
hsa-mir-892b	MI0005538	ChrX	145997198	145997274	-	UGCAAUGCCCUACUCAGAAAGGUGCCAUUUAUGUAGAUUUUAUGUCACUGGCUCCUUUCUGGGUAGAGCAAGGCUCA	#N/A	#N/A	#N/A	#N/A	#N/A
hsa-mir-892a	MI0005528	ChrX	145996669	145996743	-	GCAGUGCCUUACUCAGAAAGGUGCCAGUCACUUACACUACAUGUCACUGUGUCCUUUCUGCGUAGAGUAAGGCUC	#N/A	#N/A	#N/A	#N/A	#N/A
hsa-mir-888	MI0005537	ChrX	145994784	145994860	-	GGCAGUGCUCUACUCAAAAAGCUGUCAGUCACUUAGAUUACAUGUGACUGACACCUCUUUGGGUGAAGGAAGGCUCA	#N/A	#N/A	#N/A	#N/A	#N/A
hsa-mir-890	MI0005533	ChrX	145994275	145994351	-	GGAAGUGCCCUACUUGGAAAGGCAUCAGUUGCUUAGAUUACAUGUAACUAUUCCCUUUCUGAGUAGAGUAAGUCUUA	#N/A	#N/A	#N/A	#N/A	#N/A
hsa-mir-892c	MI0022560	ChrX	145992750	145992826	-	GGCAGUGCCCUAUUCAGAAAGGUGCCAGUCACUUAGAUUACAUGUCACUGUUUCCUUUCUGAGUGGAGUAGGGCUUA	#N/A	#N/A	#N/A	#N/A	#N/A
hsa-mir-941-1	MI0005763	Chr20	63919449	63919520	+	UGUGGACAUGUGCCCAGGGCCCGGGACAGCGCCACGGAAGAGGACGCACCCGGCUGUGUGCACAUGUGCCCA	#N/A	#N/A	#N/A	#N/A	#N/A
hsa-mir-941-2	MI0005764	Chr20	63919505	63919576	+	UGUGCACAUGUGCCCAGGGCCCGGGACAGCGCCACGGAAGAGGACGCACCCGGCUGUGUGCACAUGUGCCCA	#N/A	#N/A	#N/A	#N/A	#N/A
hsa-mir-941-3	MI0005765	Chr20	63919561	63919632	+	UGUGCACAUGUGCCCAGGGCCCGGGACAGCGCCACGGAAGAGGACGCACCCGGCUGUGUGCACAUGUGCCCA	#N/A	#N/A	#N/A	#N/A	#N/A
hsa-mir-941-4	MI0005766	Chr20	63919756	63919827	+	UGUGCACAUGUGCCCAGGGCCCGGGACAGCGCCACGGAAGAGGACGCACCCGGCUGUGUGCACAUGUGCCCA	#N/A	#N/A	#N/A	#N/A	#N/A
hsa-mir-941-5	MI0031520	Chr20	63919868	63919939	+	UGUGCACAUGUGCCCAGGGCCCGGGACAGCGCCACGGAAGAGGACGCACCCGGCUGUGUGCACAUGUGCCCA	#N/A	#N/A	#N/A	#N/A	#N/A
hsa-mir-302b	MI0000772	Chr4	112648485	112648557	-	GCUCCCUUCAACUUUAACAUGGAAGUGCUUUCUGUGACUUUAAAAGUAAGUGCUUCCAUGUUUUAGUAGGAGU	#N/A	#N/A	#N/A	#N/A	#N/A
hsa-mir-302c	MI0000773	Chr4	112648363	112648430	-	CCUUUGCUUUAACAUGGGGGUACCUGCUGUGUGAAACAAAAGUAAGUGCUUCCAUGUUUCAGUGGAGG	#N/A	#N/A	#N/A	#N/A	#N/A
hsa-mir-302a	MI0000738	Chr4	112648183	112648251	-	CCACCACUUAAACGUGGAUGUACUUGCUUUGAAACUAAAGAAGUAAGUGCUUCCAUGUUUUGGUGAUGG	#N/A	#N/A	#N/A	#N/A	#N/A
hsa-mir-302d	MI0000774	Chr4	112648004	112648071	-	CCUCUACUUUAACAUGGAGGCACUUGCUGUGACAUGACAAAAAUAAGUGCUUCCAUGUUUGAGUGUGG	#N/A	#N/A	#N/A	#N/A	#N/A
hsa-mir-367	MI0000775	Chr4	112647874	112647941	-	CCAUUACUGUUGCUAAUAUGCAACUCUGUUGAAUAUAAAUUGGAAUUGCACUUUAGCAAUGGUGAUGG	#N/A	#N/A	#N/A	#N/A	#N/A
hsa-mir-6749	MI0022594	Chr11	64902387	64902455	-	GGCCCUCGGGCCUGGGGUUGGGGGAGCUCUGUCCUGUCUCACUCAUUGCUCCUCCCCUGCCUGGCCCAG	-4.4169	-0.711629	46.7206	8.18635e-12	6.99833e-11
hsa-mir-6750	MI0022595	Chr11	64898363	64898437	-	GCUGUCAGGGAACAGCUGGGUGAGCUGCUGCCCCAGAGGCCCAGCAGGUGUCCAGAACUCACCCUCUGCUCCCAG	-3.37073	-0.589163	22.424	2.18622e-06	1.12687e-05
hsa-mir-194-2	MI0000732	Chr11	64891355	64891439	-	UGGUUCCCGCCCCCUGUAACAGCAACUCCAUGUGGAAGUGCCCACUGGUUCCAGUGGGGCUGCUGUUAUCUGGGGCGAGGGCCAG	#N/A	#N/A	#N/A	#N/A	#N/A
hsa-mir-192	MI0000234	Chr11	64891137	64891246	-	GCCGAGACCGAGUGCACAGGGCUCUGACCUAUGAAUUGACAGCCAGUGCUCUCGUCUCCCCUCUGGCUGCCAAUUCCAUAGGUCACAGGUAUGUUCGCCUCAAUGCCAGC	2.68622	16.2598	28.9036	7.60718e-08	4.5971e-07
hsa-mir-4537	MI0016908	Chr14	105859484	105859553	-	UGAGCCGAGCUGAGCUUAGCUGGGCUGAGCUAACCAGGGCUGGGCUGAGCUGGGCUGAGCUGAGCUGAGC	-2.34633	-0.845273	6.03468	0.0140275	0.03879
hsa-mir-4538	MI0016909	Chr14	105858165	105858242	-	GAGCUUGGAUGAGCUGGGCUGAACUGGGCUGGGUUGAGCUGGGCUGGGCUGAGUUGAGCCAGACUGAUCUGGGCUGAG	#N/A	#N/A	#N/A	#N/A	#N/A
hsa-mir-4507	MI0016871	Chr14	105858124	105858175	-	UCUGGGCUGAGCCGAGCUGGGUUAAGCCGAGCUGGGUUGGGCUGGGCUGGGU	#N/A	#N/A	#N/A	#N/A	#N/A
hsa-mir-4539	MI0016910	Chr14	105857513	105857572	-	UGAGCUGAGCUCUGCUGUGCUGUGCUGAGCAGGGCUGAGCUGAACUGGGCUGAGCUGGGC	#N/A	#N/A	#N/A	#N/A	#N/A
hsa-mir-4732	MI0017369	Chr17	28861655	28861730	-	GAGGGAGCUGUAGAGCAGGGAGCAGGAAGCUGUGUGUGUCCAGCCCUGACCUGUCCUGUUCUGCCCCCAGCCCCUC	-4.73058	-0.278344	76.114	2.6775e-18	3.64452e-17
hsa-mir-144	MI0000460	Chr17	28861533	28861618	-	UGGGGCCCUGGCUGGGAUAUCAUCAUAUACUGUAAGUUUGCGAUGAGACACUACAGUAUAGAUGAUGUACUAGUCCGGGCACCCCC	5.35435	6.34014	53.901	2.10851e-13	2.06722e-12
hsa-mir-451b	MI0017360	Chr17	28861371	28861438	+	UGGGUAUAGCAAGAGAACCAUUACCAUUACUAAACUCAGUAAUGGUAACGGUUUCCUUGCCAUUCCCA	#N/A	#N/A	#N/A	#N/A	#N/A
hsa-mir-451a	MI0001729	Chr17	28861369	28861440	-	CUUGGGAAUGGCAAGGAAACCGUUACCAUUACUGAGUUUAGUAAUGGUAAUGGUUCUCUUGCUAUACCCAGA	2.60304	8.38644	17.8393	2.40373e-05	0.000106806
hsa-mir-1250	MI0006385	Chr17	81133196	81133308	-	CUGUCCCGCUGGCCUGGCAGGUGACGGUGCUGGAUGUGGCCUUUUUGCCUUUUCUAAAGGCCACAUUUUCCAGCCCAUUCAACCUUCCAGAGCCCUCUGAAGUGGCCACAGGC	#N/A	#N/A	#N/A	#N/A	#N/A
hsa-mir-338	MI0000814	Chr17	81125883	81125949	-	UCUCCAACAAUAUCCUGGUGCUGAGUGAUGACUCAGGCGACUCCAGCAUCAGUGAUUUUGUUGAAGA	2.21584	9.06665	15.3044	9.15029e-05	0.000380674
hsa-mir-3065	MI0014228	Chr17	81125877	81125955	+	CUGCCCUCUUCAACAAAAUCACUGAUGCUGGAGUCGCCUGAGUCAUCACUCAGCACCAGGAUAUUGUUGGAGAGGACAG	#N/A	#N/A	#N/A	#N/A	#N/A
hsa-mir-657	MI0003681	Chr17	81125276	81125373	-	GUGUAGUAGAGCUAGGAGGAGAGGGUCCUGGAGAAGCGUGGACCGGUCCGGGUGGGUUCCGGCAGGUUCUCACCCUCUCUAGGCCCCAUUCUCCUCUG	#N/A	#N/A	#N/A	#N/A	#N/A
hsa-mir-371a	MI0000779	Chr19	53787675	53787741	+	GUGGCACUCAAACUGUGGGGGCACUUUCUGCUCUCUGGUGAAAGUGCCGCCAUCUUUUGAGUGUUAC	#N/A	#N/A	#N/A	#N/A	#N/A
hsa-mir-371b	MI0017393	Chr19	53787677	53787742	-	GGUAACACUCAAAAGAUGGCGGCACUUUCACCAGAGAGCAGAAAGUGCCCCCACAGUUUGAGUGCC	#N/A	#N/A	#N/A	#N/A	#N/A
hsa-mir-372	MI0000780	Chr19	53787890	53787956	+	GUGGGCCUCAAAUGUGGAGCACUAUUCUGAUGUCCAAGUGGAAAGUGCUGCGACAUUUGAGCGUCAC	#N/A	#N/A	#N/A	#N/A	#N/A
hsa-mir-373	MI0000781	Chr19	53788705	53788773	+	GGGAUACUCAAAAUGGGGGCGCUUUCCUUUUUGUCUGUACUGGGAAGUGCUUCGAUUUUGGGGUGUCCC	#N/A	#N/A	#N/A	#N/A	#N/A
hsa-mir-23b	MI0000439	Chr9	95085208	95085304	+	CUCAGGUGCUCUGGCUGCUUGGGUUCCUGGCAUGCUGAUUUGUGACUUAAGAUUAAAAUCACAUUGCCAGGGAUUACCACGCAACCACGACCUUGGC	#N/A	#N/A	#N/A	#N/A	#N/A
hsa-mir-27b	MI0000440	Chr9	95085445	95085541	+	ACCUCUCUAACAAGGUGCAGAGCUUAGCUGAUUGGUGAACAGUGAUUGGUUUCCGCUUUGUUCACAGUGGCUAAGUUCUGCACCUGAAGAGAAGGUG	#N/A	#N/A	#N/A	#N/A	#N/A
hsa-mir-3074	MI0014181	Chr9	95086014	95086094	-	GCUCGACUCCUGUUCCUGCUGAACUGAGCCAGUGUGUAAAAUGAGAACUGAUAUCAGCUCAGUAGGCACCGGAGGGCGGGU	-2.29656	3.11207	56.0655	7.00971e-14	7.17344e-13
hsa-mir-24-1	MI0000080	Chr9	95086021	95086088	+	CUCCGGUGCCUACUGAGCUGAUAUCAGUUCUCAUUUUACACACUGGCUCAGUUCAGCAGGAACAGGAG	1.80045	9.99718	64.1279	1.16601e-15	1.2872e-14
hsa-mir-508	MI0003195	ChrX	147236913	147237027	-	CCACCUUCAGCUGAGUGUAGUGCCCUACUCCAGAGGGCGUCACUCAUGUAAACUAAAACAUGAUUGUAGCCUUUUGGAGUAGAGUAAUACACAUCACGUAACGCAUAUUUGGUGG	3.80301	5.14581	8.69018	0.00319929	0.00979347
hsa-mir-507	MI0003194	ChrX	147230984	147231077	-	GUGCUGUGUGUAGUGCUUCACUUCAAGAAGUGCCAUGCAUGUGUCUAGAAAUAUGUUUUGCACCUUUUGGAGUGAAAUAAUGCACAACAGAUAC	#N/A	#N/A	#N/A	#N/A	#N/A
hsa-mir-506	MI0003193	ChrX	147230720	147230843	-	GCCACCACCAUCAGCCAUACUAUGUGUAGUGCCUUAUUCAGGAAGGUGUUACUUAAUAGAUUAAUAUUUGUAAGGCACCCUUCUGAGUAGAGUAAUGUGCAACAUGGACAACAUUUGUGGUGGC	#N/A	#N/A	#N/A	#N/A	#N/A
hsa-mir-513a-2	MI0003192	ChrX	147225826	147225952	-	GGAUGCCACAUUCAGCCAUUCAGUGUGCAGUGCCUUUCACAGGGAGGUGUCAUUUAUGUGAACUAAAAUAUAAAUUUCACCUUUCUGAGAAGGGUAAUGUACAGCAUGCACUGCAUAUGUGGUGUCC	#N/A	#N/A	#N/A	#N/A	#N/A
hsa-mir-509-1	MI0003196	ChrX	147260532	147260625	-	CAUGCUGUGUGUGGUACCCUACUGCAGACAGUGGCAAUCAUGUAUAAUUAAAAAUGAUUGGUACGUCUGUGGGUAGAGUACUGCAUGACACAUG	#N/A	#N/A	#N/A	#N/A	#N/A
hsa-mir-509-3	MI0005717	ChrX	147259652	147259726	-	GUGGUACCCUACUGCAGACGUGGCAAUCAUGUAUAAUUAAAAAUGAUUGGUACGUCUGUGGGUAGAGUACUGCAU	#N/A	#N/A	#N/A	#N/A	#N/A
hsa-mir-509-2	MI0005530	ChrX	147258760	147258850	-	CAUGCUGUGUGUGGUACCCUACUGCAGACAGUGGCAAUCAUGUAUAAUUAAAAAUGAUUGGUACGUCUGUGGGUAGAGUACUGCAUGACAC	#N/A	#N/A	#N/A	#N/A	#N/A
hsa-mir-514b	MI0014251	ChrX	147250151	147250230	-	CAUGUGGUACUCUUCUCAAGAGGGAGGCAAUCAUGUGUAAUUAGAUAUGAUUGACACCUCUGUGAGUGGAGUAACACAUG	#N/A	#N/A	#N/A	#N/A	#N/A
hsa-mir-514a-3	MI0003200	ChrX	147284641	147284728	-	GUUGUCUGUGGUACCCUACUCUGGAGAGUGACAAUCAUGUAUAACUAAAUUUGAUUGACACUUCUGUGAGUAGAGUAACGCAUGACAC	6.88683	2.10431	9.02888	0.00265747	0.0082795
hsa-mir-514a-2	MI0003199	ChrX	147281943	147282030	-	GUUGUCUGUGGUACCCUACUCUGGAGAGUGACAAUCAUGUAUAACUAAAUUUGAUUGACACUUCUGUGAGUAGAGUAACGCAUGACAC	6.9043	2.12096	8.9106	0.0028352	0.00875539
hsa-mir-514a-1	MI0003198	ChrX	147279247	147279344	-	AACAUGUUGUCUGUGGUACCCUACUCUGGAGAGUGACAAUCAUGUAUAAUUAAAUUUGAUUGACACUUCUGUGAGUAGAGUAACGCAUGACACGUACG	6.80217	2.03301	9.07123	0.00259663	0.00810795
hsa-mir-510	MI0003197	ChrX	147272335	147272408	-	GUGGUGUCCUACUCAGGAGAGUGGCAAUCACAUGUAAUUAGGUGUGAUUGAAACCUCUAAGAGUGGAGUAACAC	#N/A	#N/A	#N/A	#N/A	#N/A
hsa-mir-200b	MI0000342	Chr1	1167104	1167198	+	CCAGCUCGGGCAGCCGUGGCCAUCUUACUGGGCAGCAUUGGAUGGAGUCAGGUCUCUAAUACUGCCUGGUAAUGAUGACGGCGGAGCCCUGCACG	#N/A	#N/A	#N/A	#N/A	#N/A
hsa-mir-200a	MI0000737	Chr1	1167863	1167952	+	CCGGGCCCCUGUGAGCAUCUUACCGGACAGUGCUGGAUUUCCCAGCUUGACUCUAACACUGUCUGGUAACGAUGUUCAAAGGUGACCCGC	#N/A	#N/A	#N/A	#N/A	#N/A
hsa-mir-429	MI0001641	Chr1	1169005	1169087	+	CGCCGGCCGAUGGGCGUCUUACCAGACAUGGUUAGACCUGGCCCUCUGUCUAAUACUGUCUGGUAAAACCGUCCAUCCGCUGC	3.36763	8.79026	53.6244	2.42732e-13	2.36326e-12
hsa-mir-199a-2	MI0000281	Chr1	172144535	172144644	-	AGGAAGCUUCUGGAGAUCCUGCUCCGUCGCCCCAGUGUUCAGACUACCUGUUCAGGACAAUGCCGUUGUACAGUAGUCUGCACAUUGGUUAGACUGGGCAAGGGAGAGCA	2.19871	11.1268	24.7396	6.5623e-07	3.59388e-06
hsa-mir-3120	MI0014136	Chr1	172138808	172138888	+	GUCAUGUGACUGCCUGUCUGUGCCUGCUGUACAGGUGAGCGGAUGUUCUGCACAGCAAGUGUAGACAGGCAGACACAUGAC	#N/A	#N/A	#N/A	#N/A	#N/A
hsa-mir-214	MI0000290	Chr1	172138798	172138907	-	GGCCUGGCUGGACAGAGUUGUCAUGUGUCUGCCUGUCUACACUUGCUGUGCAGAACAUCCGCUCACCUGUACAGCAGGCACAGACAGGCAGUCACAUGACAACCCAGCCU	-1.0185	4.69334	9.91802	0.00163669	0.00533636
hsa-mir-100	MI0000102	Chr11	122152229	122152308	-	CCUGUUGCCACAAACCCGUAGAUCCGAACUUGUGGUAUUAGUCCGCACAAGCUUGUAUCUAUAGGUAUGUGUCUGUUAGG	#N/A	#N/A	#N/A	#N/A	#N/A
hsa-mir-10526	MI0033673	Chr11	122152103	122152156	-	UCCCCUUAGUUUCCUUUAAGAGUGAUAAAAAUGGAAAAGGGGGCUGAGGUGGAG	#N/A	#N/A	#N/A	#N/A	#N/A
hsa-let-7a-2	MI0000061	Chr11	122146522	122146593	-	AGGUUGAGGUAGUAGGUUGUAUAGUUUAGAAUUACAUCAAGGGAGAUAACUGUACAGCCUCCUAGCUUUCCU	-1.54993	12.6708	64.9158	7.81669e-16	8.98278e-15
hsa-mir-1179	MI0006272	Chr15	88608107	88608197	+	GGCUGGAAAGGAAGAAGCAUUCUUUCAUUGGUUGGUGUGUAUUGCCUUGUCAACCAAUAAGAGGAUGCCAUUUAUCCUUUUCUGACUAGCU	#N/A	#N/A	#N/A	#N/A	#N/A
hsa-mir-7-2	MI0000264	Chr15	88611825	88611934	+	CUGGAUACAGAGUGGACCGGCUGGCCCCAUCUGGAAGACUAGUGAUUUUGUUGUUGUCUUACUGCGCUCAACAACAAAUCCCAGUCUACCUAAUGGUGCCAGCCAUCGCA	7.11795	2.39198	28.6704	8.58063e-08	5.16311e-07
hsa-mir-3529	MI0017351	Chr15	88611847	88611924	-	GGCACCAUUAGGUAGACUGGGAUUUGUUGUUGAGCGCAGUAAGACAACAACAAAAUCACUAGUCUUCCAGAUGGGGCC	#N/A	#N/A	#N/A	#N/A	#N/A
hsa-mir-3677	MI0016078	Chr16	2270713	2270772	+	GGCAGUGGCCAGAGCCCUGCAGUGCUGGGCAUGGGCUUCUCGUGGGCUCUGGCCACGGCC	2.34546	3.45816	16.8567	4.03103e-05	0.000172829
hsa-mir-940	MI0005762	Chr16	2271747	2271840	+	GUGAGGUGUGGGCCCGGCCCCAGGAGCGGGGCCUGGGCAGCCCCGUGUGUUGAGGAAGGAAGGCAGGGCCCCCGCUCCCCGGGCCUGACCCCAC	-1.69002	2.12717	17.6636	2.63619e-05	0.000115498
hsa-mir-4717	MI0017352	Chr16	2274620	2274691	+	GGCAGUGUUUAGGCCACAGCCACCCAUGUGUAGGGGUGGCUACACAUGGGUGGCUGUGGCCUAAACACUGCC	-2.88012	-0.638572	12.8327	0.00034062	0.00126671
hsa-mir-3179-1	MI0014213	Chr16	14901508	14901591	+	CAGGAUCACAGACGUUUAAAUUACACUCCUUCUGCUGUGCCUUACAGCAGUAGAAGGGGUGAAAUUUAAACGUCUGUGAUCCUG	#N/A	#N/A	#N/A	#N/A	#N/A
hsa-mir-3670-1	MI0016071	Chr16	14907717	14907781	+	UCUAGACUGGUAUAGCUGCUUUUGGAGCCUCACCUGCUGAGAGCUCACAGCUGUCCUUCUCUAGA	#N/A	#N/A	#N/A	#N/A	#N/A
hsa-mir-3180-1	MI0014214	Chr16	14911220	14911313	+	CAGUGCGACGGGCGGAGCUUCCAGACGCUCCGCCCCACGUCGCAUGCGCCCCGGGAAAGCGUGGGGCGGAGCUUCCGGAGGCCCCGCCCUGCUG	#N/A	#N/A	#N/A	#N/A	#N/A
hsa-mir-3179-2	MI0014216	Chr16	16300159	16300242	+	CAGGAUCACAGACGUUUAAAUUACACUCCUUCUGCUGUGCCUUACAGCAGUAGAAGGGGUGAAAUUUAAACGUCUGUGAUCCUG	#N/A	#N/A	#N/A	#N/A	#N/A
hsa-mir-3670-2	MI0019112	Chr16	16306370	16306434	+	UCUAGACUGGUAUAGCUGCUUUUGGAGCCUCACCUGCUGAGAGCUCACAGCUGUCCUUCUCUAGA	#N/A	#N/A	#N/A	#N/A	#N/A
hsa-mir-3180-2	MI0014215	Chr16	16309879	16309966	+	GCGACGGGCGGAGCUUCCAGACGCUCCGCCCCACGUCGCAUGCGCCCCGGGAAAGCGUGGGGCGGAGCUUCCGGAGGCCCCGCCCUGC	#N/A	#N/A	#N/A	#N/A	#N/A
hsa-mir-3179-3	MI0014221	Chr16	18411894	18411977	-	CAGGAUCACAGACGUUUAAAUUACACUCCUUCUGCUGUGCCUUACAGCAGUAGAAGGGGUGAAAUUUAAACGUCUGUGAUCCUG	#N/A	#N/A	#N/A	#N/A	#N/A
hsa-mir-3670-3	MI0031513	Chr16	18405698	18405762	-	UCUAGACUGGUAUAGCUGCUUUUGGAGCCUCACCUGCUGAGAGCUCACAGCUGUCCUUCUCUAGA	#N/A	#N/A	#N/A	#N/A	#N/A
hsa-mir-3180-3	MI0014217	Chr16	18402178	18402271	-	CAGUGCGACGGGCGGAGCUUCCAGACGCUCCGCCCCACGUCGCAUGCGCCCCGGGAAAGCGUGGGGCGGAGCUUCCGGAGGCCCCGCCCUGCUG	#N/A	#N/A	#N/A	#N/A	#N/A
hsa-mir-23a	MI0000079	Chr19	13836587	13836659	-	GGCCGGCUGGGGUUCCUGGGGAUGGGAUUUGCUUCCUGUCACAAAUCACAUUGCCAGGGAUUUCCAACCGACC	#N/A	#N/A	#N/A	#N/A	#N/A
hsa-mir-27a	MI0000085	Chr19	13836440	13836517	-	CUGAGGAGCAGGGCUUAGCUGCUUGUGAGCAGGGUCCACACCAAGUCGUGUUCACAGUGGCUAAGUUCCGCCCCCCAG	1.97328	10.7766	30.9653	2.62687e-08	1.64414e-07
hsa-mir-24-2	MI0000081	Chr19	13836287	13836359	-	CUCUGCCUCCCGUGCCUACUGAGCUGAAACACAGUUGGUUUGUGUACACUGGCUCAGUUCAGCAGGAACAGGG	1.92885	10.0084	71.7968	2.38537e-17	2.95955e-16
hsa-mir-99b	MI0000746	Chr19	51692612	51692681	+	GGCACCCACCCGUAGAACCGACCUUGCGGGGCCUUCGCCGCACACAAGCUCGUGUCUGUGGGUCCGUGUC	-3.06493	14.0113	270.684	8.05021e-61	5.9402e-59
hsa-let-7e	MI0000066	Chr19	51692786	51692864	+	CCCGGGCUGAGGUAGGAGGUUGUAUAGUUGAGGAGGACACCCAAGGAGAUCACUAUACGGCCUCCUAGCUUUCCCCAGG	-1.18846	9.15886	18.1398	2.05263e-05	9.25334e-05
hsa-mir-125a	MI0000469	Chr19	51693254	51693339	+	UGCCAGUCUCUAGGUCCCUGAGACCCUUUAACCUGUGAGGACAUCCAGGGUCACAGGUGAGGUUCUUGGGAGCCUGGCGUCUGGCC	-3.92739	8.60807	580.441	3.00682e-128	8.43113e-126
hsa-mir-6803	MI0022648	Chr19	55245186	55245250	-	CUCCUCUGGGGGUGGGGGGCUGGGCGUGGUGGACAGCGAUGCAUCCCUCGCCUUCUCACCCUCAG	-4.48173	-0.322135	113.122	2.02876e-26	4.66283e-25
hsa-mir-6802	MI0022647	Chr19	55239912	55239976	-	GAGGGCUAGGUGGGGGGCUUGAAGCCCCGAGAUGCCUCACGUCUUCACCCCUCUCACCUAAGCAG	-3.38976	-0.208828	49.4238	2.06227e-12	1.84159e-11
hsa-mir-6804	MI0022649	Chr19	55230885	55230952	-	GGAUGUGAGGGUGUCAGCAGGUGACGGUGGGGGCCACGCUGACAGCCGCACCUGCCUCUCACCCACAG	#N/A	#N/A	#N/A	#N/A	#N/A
hsa-mir-6724-1	MI0022559	Chr21	8205315	8205406	+	CGCUGCGCUUCUGGGCCCGCGGCGGGCGUGGGGCUGCCCGGGCCGGUCGACCAGCGCGCCGUAGCUCCCGAGGCCCGAGCCGCGACCCGCGG	#N/A	#N/A	#N/A	#N/A	#N/A
hsa-mir-10401	MI0033425	Chr21	8206563	8206618	+	CGUGUGGGAAGGCGUGGGGUGCGGACCCCGGCCCGACCUCGCCGUCCCGCCCGCCG	#N/A	#N/A	#N/A	#N/A	#N/A
hsa-mir-10401	MI0033425	Chr21	8250772	8250827	+	CGUGUGGGAAGGCGUGGGGUGCGGACCCCGGCCCGACCUCGCCGUCCCGCCCGCCG	#N/A	#N/A	#N/A	#N/A	#N/A
hsa-mir-10401	MI0033425	Chr21	8389610	8389665	+	CGUGUGGGAAGGCGUGGGGUGCGGACCCCGGCCCGACCUCGCCGUCCCGCCCGCCG	#N/A	#N/A	#N/A	#N/A	#N/A
hsa-mir-10401	MI0033425	Chr21	8433797	8433852	+	CGUGUGGGAAGGCGUGGGGUGCGGACCCCGGCCCGACCUCGCCGUCCCGCCCGCCG	#N/A	#N/A	#N/A	#N/A	#N/A
hsa-mir-3648-1	MI0016048	Chr21	8208473	8208652	+	CGCGACUGCGGCGGCGGUGGUGGGGGGAGCCGCGGGGAUCGCCGAGGGCCGGUCGGCCGCCCCGGGUGCCGCGCGGUGCCGCCGGCGGCGGUGAGGCCCCGCGCGUGUGUCCCGGCUGCGGUCGGCCGCGCUCGAGGGGUCCCCGUGGCGUCCCCUUCCCCGCCGGCCGCCUUUCUCGCG	#N/A	#N/A	#N/A	#N/A	#N/A
hsa-mir-6724-4	MI0031518	Chr21	8432530	8432621	+	CGCUGCGCUUCUGGGCCCGCGGCGGGCGUGGGGCUGCCCGGGCCGGUCGACCAGCGCGCCGUAGCUCCCGAGGCCCGAGCCGCGACCCGCGG	#N/A	#N/A	#N/A	#N/A	#N/A
hsa-mir-10401	MI0033425	Chr21	8206563	8206618	+	CGUGUGGGAAGGCGUGGGGUGCGGACCCCGGCCCGACCUCGCCGUCCCGCCCGCCG	#N/A	#N/A	#N/A	#N/A	#N/A
hsa-mir-10401	MI0033425	Chr21	8250772	8250827	+	CGUGUGGGAAGGCGUGGGGUGCGGACCCCGGCCCGACCUCGCCGUCCCGCCCGCCG	#N/A	#N/A	#N/A	#N/A	#N/A
hsa-mir-10401	MI0033425	Chr21	8389610	8389665	+	CGUGUGGGAAGGCGUGGGGUGCGGACCCCGGCCCGACCUCGCCGUCCCGCCCGCCG	#N/A	#N/A	#N/A	#N/A	#N/A
hsa-mir-10401	MI0033425	Chr21	8433797	8433852	+	CGUGUGGGAAGGCGUGGGGUGCGGACCCCGGCCCGACCUCGCCGUCCCGCCCGCCG	#N/A	#N/A	#N/A	#N/A	#N/A
hsa-mir-10396b	MI0033426	Chr21	8436324	8436374	+	CGGCGGGGCUCGGAGCCGGGCUUCGGCCGGGCCCCGGGCCCUCGACCGGAC	#N/A	#N/A	#N/A	#N/A	#N/A
hsa-let-7a-3	MI0000062	Chr22	46112749	46112822	+	GGGUGAGGUAGUAGGUUGUAUAGUUUGGGGCUCUGCCCUGCUAUGGGAUAACUAUACAAUCUACUGUCUUUCCU	-1.54581	12.6779	64.8212	8.20102e-16	9.34783e-15
hsa-mir-4763	MI0017404	Chr22	46113566	46113657	+	CCUGUCCCUCCUGCCCUGCGCCUGCCCAGCCCUCCUGCUCUGGUGACUGAGGACCGCCAGGCAGGGGCUGGUGCUGGGCGGGGGGCGGCGGG	-2.84476	-0.706292	10.0004	0.00156507	0.00518729
hsa-let-7b	MI0000063	Chr22	46113686	46113768	+	CGGGGUGAGGUAGUAGGUUGUGUGGUUUCAGGGCAGUGAUGUUGCCCCUCGGAAGAUAACUAUACAACCUACUGCCUUCCCUG	-3.4625	13.4677	551.022	7.54546e-122	1.51125e-119
hsa-mir-449c	MI0003823	Chr5	55172262	55172353	-	GCUGGGAUGUGUCAGGUAGGCAGUGUAUUGCUAGCGGCUGUUAAUGAUUUUAACAGUUGCUAGUUGCACUCCUCUCUGUUGCAUUCAGAAGC	#N/A	#N/A	#N/A	#N/A	#N/A
hsa-mir-449b	MI0003673	Chr5	55170646	55170742	-	UGACCUGAAUCAGGUAGGCAGUGUAUUGUUAGCUGGCUGCUUGGGUCAAGUCAGCAGCCACAACUACCCUGCCACUUGCUUCUGGAUAAAUUCUUCU	#N/A	#N/A	#N/A	#N/A	#N/A
hsa-mir-449a	MI0001648	Chr5	55170532	55170622	-	CUGUGUGUGAUGAGCUGGCAGUGUAUUGUUAGCUGGUUGAAUAUGUGAAUGGCAUCGGCUAACAUGCAACUGCUGUCUUAUUGCAUAUACA	#N/A	#N/A	#N/A	#N/A	#N/A
hsa-mir-106b	MI0000734	Chr7	100093993	100094074	-	CCUGCCGGGGCUAAAGUGCUGACAGUGCAGAUAGUGGUCCUCUCCGUGCUACCGCACUGUGGGUACUUGCUGCUCCAGCAGG	#N/A	#N/A	#N/A	#N/A	#N/A
hsa-mir-93	MI0000095	Chr7	100093768	100093847	-	CUGGGGGCUCCAAAGUGCUGUUCGUGCAGGUAGUGUGAUUACCCAACCUACUGCUGAGCUAGCACUUCCCGAGCCCCCGG	#N/A	#N/A	#N/A	#N/A	#N/A
hsa-mir-25	MI0000082	Chr7	100093560	100093643	-	GGCCAGUGUUGAGAGGCGGAGACUUGGGCAAUUGCUGGACGCUGCCCUGGGCAUUGCACUUGUCUCGGUCUGACAGUGCCGGCC	#N/A	#N/A	#N/A	#N/A	#N/A
hsa-mir-183	MI0000273	Chr7	129774905	129775014	-	CCGCAGAGUGUGACUCCUGUUCUGUGUAUGGCACUGGUAGAAUUCACUGUGAACAGUCUCAGUCAGUGAAUUACCGAAGGGCCAUAAACAGAGCAGAGACAGAUCCACGA	2.52484	13.1003	35.4946	2.55752e-09	1.79282e-08
hsa-mir-96	MI0000098	Chr7	129774692	129774769	-	UGGCCGAUUUUGGCACUAGCACAUUUUUGCUUGUGUCUCUCCGCUCUGAGCAAUCAUGUGCAGUGCCAAUAUGGGAAA	4.70165	4.41229	57.8967	2.76247e-14	2.89029e-13
hsa-mir-182	MI0000272	Chr7	129770383	129770492	-	GAGCUGCUUGCCUCCCCCCGUUUUUGGCAAUGGUAGAACUCACACUGGUGAGGUAACAGGAUCCGGUGGUUCUAGACUUGCCAACUAUGGGGCGAGGACUCAGCCGGCAC	4.539	14.016	93.0336	5.14152e-22	9.12457e-21
hsa-mir-5692a-2	MI0019298	Chr8	12719132	12719190	+	UACAAAUAAUACCACAGUGGGUGUACCUCAUGUGUGUACACCCUGUGAUAUUAUUUGUA	#N/A	#N/A	#N/A	#N/A	#N/A
hsa-mir-3926-1	MI0016434	Chr8	12727232	12727304	-	AAAAUGGAGCUGGCCAAAAAGCAGGCAGAGACUUUAAAAGCGUCUCUGCCUGCUUUUUGGCCAGCUCCGUUUU	#N/A	#N/A	#N/A	#N/A	#N/A
hsa-mir-3926-2	MI0016437	Chr8	12727237	12727299	+	GGAGCUGGCCAAAAAGCAGGCAGAGACGCUUUUAAAGUCUCUGCCUGCUUUUUGGCCAGCUCC	#N/A	#N/A	#N/A	#N/A	#N/A
hsa-mir-6849	MI0022695	Chr8	144400277	144400345	-	CCUGGGAGUGGAUAGGGGAGUGUGUGGAGAGAGCACUGAGCCUGCCCACCAGCCUGUGUCCACCUCCAG	#N/A	#N/A	#N/A	#N/A	#N/A
hsa-mir-1234	MI0006324	Chr8	144400086	144400165	-	GUGAGUGUGGGGUGGCUGGGGCGGGGGGGGCCCGGGGACGGCUUGGGCCUGCCUAGUCGGCCUGACCACCCACCCCACAG	-3.25321	-0.678423	18.2677	1.91936e-05	8.68045e-05
hsa-mir-939	MI0005761	Chr8	144394149	144394230	-	UGUGGGCAGGGCCCUGGGGAGCUGAGGCUCUGGGGGUGGCCGGGGCUGACCCUGGGCCUCUGCUCCCCAGUGUCUGACCGCG	-1.4019	1.11116	11.8417	0.000579197	0.00207151
hsa-let-7a-1	MI0000060	Chr9	94175957	94176036	+	UGGGAUGAGGUAGUAGGUUGUAUAGUUUUAGGGUCACACCCACCACUGGGAGAUAACUAUACAAUCUACUGUCUUUCCUA	-1.54367	12.674	64.3777	1.02713e-15	1.15203e-14
hsa-let-7f-1	MI0000067	Chr9	94176347	94176433	+	UCAGAGUGAGGUAGUAGAUUGUAUAGUUGUGGGGUAGUGAUUUUACCCUGUUCAGGAGAUAACUAUACAAUCUAUUGCCUUCCCUGA	3.32262	11.8981	38.4292	5.67759e-10	4.21163e-09
hsa-let-7d	MI0000065	Chr9	94178834	94178920	+	CCUAGGAAGAGGUAGUAGGUUGCAUAGUUUUAGGGCAGGGAUUUUGCCCACAAGGAGGUAACUAUACGACCUGCUGCCUUUCUUAGG	-3.61829	9.53587	635.374	3.38833e-140	1.18761e-137
hsa-mir-374c	MI0016684	ChrX	74218549	74218618	+	ACACGGACAAUGAUAAUACAACCUGCUAAGUGCUAGGACACUUAGCAGGUUGUAUUAUAUCCAUCCGAGU	5.82456	1.17907	5.84626	0.0156102	0.0425788
hsa-mir-374b	MI0005566	ChrX	74218547	74218618	-	ACUCGGAUGGAUAUAAUACAACCUGCUAAGUGUCCUAGCACUUAGCAGGUUGUAUUAUCAUUGUCCGUGUCU	3.76329	6.24658	93.3604	4.35891e-22	7.83485e-21
hsa-mir-421	MI0003685	ChrX	74218377	74218461	-	GCACAUUGUAGGCCUCAUUAAAUGUUUGUUGAAUGAAAAAAUGAAUCAUCAACAGACAUUAAUUGGGCGCCUGCUCUGUGAUCUC	3.43012	2.52595	23.6682	1.14459e-06	6.07849e-06
hsa-mir-105-2	MI0000112	ChrX	152394412	152394492	-	UGUGCAUCGUGGUCAAAUGCUCAGACUCCUGUGGUGGCUGCUUAUGCACCACGGAUGUUUGAGCAUGUGCUAUGGUGUCUA	#N/A	#N/A	#N/A	#N/A	#N/A
hsa-mir-767	MI0003763	ChrX	152393421	152393529	-	GCUUUUAUAUUGUAGGUUUUUGCUCAUGCACCAUGGUUGUCUGAGCAUGCAGCAUGCUUGUCUGCUCAUACCCCAUGGUUUCUGAGCAGGAACCUUCAUUGUCUACUGC	#N/A	#N/A	#N/A	#N/A	#N/A
hsa-mir-105-1	MI0000111	ChrX	152392219	152392299	-	UGUGCAUCGUGGUCAAAUGCUCAGACUCCUGUGGUGGCUGCUCAUGCACCACGGAUGUUUGAGCAUGUGCUACGGUGUCUA	#N/A	#N/A	#N/A	#N/A	#N/A
hsa-mir-30e	MI0000749	Chr1	40754355	40754446	+	GGGCAGUCUUUGCUACUGUAAACAUCCUUGACUGGAAGCUGUAAGGUGUUCAGAGGAGCUUUCAGUCGGAUGUUUACAGCGGCAGGCUGCCA	1.67049	13.201	50.6313	1.11451e-12	1.00809e-11
hsa-mir-30c-1	MI0000736	Chr1	40757284	40757372	+	ACCAUGCUGUAGUGUGUGUAAACAUCCUACACUCUCAGCUGUGAGCUCAAGGUGGCUGGGAGAGGGUUGUUUACUCCUUCUGCCAUGGA	#N/A	#N/A	#N/A	#N/A	#N/A
hsa-mir-4421	MI0016758	Chr1	51059837	51059905	+	CUGGGUCUCCUUUCUGCUGAGAGUUGAACACUUGUUGGGACAACCUGUCUGUGGAAAGGAGCUACCUAC	#N/A	#N/A	#N/A	#N/A	#N/A
hsa-mir-6500	MI0022211	Chr1	51060018	51060103	+	CCUGCCUGCAGAAAGGAGCUAUCCACUCCAGGUGUCCUUUCUUCUGAGAGCUGGACACUUGUUGGGAUGACCUGCCUGCAGGUAGG	#N/A	#N/A	#N/A	#N/A	#N/A
hsa-mir-3116-1	MI0014128	Chr1	62078786	62078859	+	CUUUAUUGAGUCCCUACUAUGUUCCAGGCACUGGGUAUCGUAGGUGCCUGGAACAUAGUAGGGACUCAAUAAAG	#N/A	#N/A	#N/A	#N/A	#N/A
hsa-mir-3116-2	MI0014129	Chr1	62078789	62078856	-	UAUUGAGUCCCUACUAUGUUCCAGGCACCUACGAUACCCAGUGCCUGGAACAUAGUAGGGACUCAAUA	#N/A	#N/A	#N/A	#N/A	#N/A
hsa-mir-101-1	MI0000103	Chr1	65058434	65058508	-	UGCCCUGGCUCAGUUAUCACAGUGCUGAUGCUGUCUAUUCUAAAGGUACAGUACUGUGAUAACUGAAGGAUGGCA	5.01943	11.6301	232.654	1.57268e-52	9.18709e-51
hsa-mir-3671	MI0016072	Chr1	65057755	65057842	-	AUGUUAUUGCUGCUGCUGUCACAUUUACAUGAAAAUAAAAUGUAAAUUAUUUUAUUUCUAUCAAAUAAGGACUAGUCUGCAGUGAUAU	#N/A	#N/A	#N/A	#N/A	#N/A
hsa-mir-137	MI0000454	Chr1	98046070	98046171	-	GGUCCUCUGACUCUCUUCGGUGACGGGUAUUCUUGGGUGGAUAAUACGGAUUACGUUGUUAUUGCUUAAGAAUACGCGUAGUCGAGGAGAGUACCAGCGGCA	#N/A	#N/A	#N/A	#N/A	#N/A
hsa-mir-2682	MI0012063	Chr1	98045242	98045351	-	ACCUUCCUGAAAGAGGUUGGGGCAGGCAGUGACUGUUCAGACGUCCAAUCUCUUUGGGACGCCUCUUCAGCGCUGUCUUCCCUGCCUCUGCCUUUAGGACGAGUCUCAAA	#N/A	#N/A	#N/A	#N/A	#N/A
hsa-mir-3119-1	MI0014134	Chr1	170151378	170151462	-	AUUAACUCUGGCUUUUAACUUUGAUGGCAAAGGGGUAGCUAAACAAUCUAUGUCUUUGCCAUCAAAGUUAAAAGCCAUAGUUAAU	#N/A	#N/A	#N/A	#N/A	#N/A
hsa-mir-3119-2	MI0014135	Chr1	170151378	170151462	+	AUUAACUAUGGCUUUUAACUUUGAUGGCAAAGACAUAGAUUGUUUAGCUACCCCUUUGCCAUCAAAGUUAAAAGCCAGAGUUAAU	#N/A	#N/A	#N/A	#N/A	#N/A
hsa-mir-1295b	MI0019146	Chr1	171101739	171101798	+	CACCCAGAUCUGCGGCCUAAUCACAGGCCACAUUUCUGAAUAGGCCACGGAUCUGGGCAA	#N/A	#N/A	#N/A	#N/A	#N/A
hsa-mir-1295a	MI0006357	Chr1	171101728	171101806	-	AGGACAUUUUGCCCAGAUCCGUGGCCUAUUCAGAAAUGUGGCCUGUGAUUAGGCCGCAGAUCUGGGUGAAAUGUCCUCC	-4.33445	-0.239534	101.942	5.71813e-24	1.09819e-22
hsa-mir-181a-1	MI0000289	Chr1	198859044	198859153	-	UGAGUUUUGAGGUUGCUUCAGUGAACAUUCAACGCUGUCGGUGAGUUUGGAAUUAAAAUCAAAACCAUCGACCGUUGAUUGUACCCUAUGGCUAACCAUCAUCUACUCCA	-3.21943	9.10275	309.008	3.59187e-69	2.96224e-67
hsa-mir-181b-1	MI0000270	Chr1	198858873	198858982	-	CCUGUGCAGAGAUUAUUUUUUAAAAGGUCACAAUCAACAUUCAUUGCUGUCGGUGGGUUGAACUGUGUGGACAAGCUCACUGAACAAUGAAUGCAACUGUGGCCCCGCUU	-1.23401	6.8062	24.8662	6.14511e-07	3.40531e-06
hsa-mir-29b-2	MI0000107	Chr1	207802443	207802523	-	CUUCUGGAAGCUGGUUUCACAUGGUGGCUUAGAUUUUUCCAUCUUUGUAUCUAGCACCAUUUGAAAUCAGUGUUUUAGGAG	2.51843	8.86385	35.0775	3.1684e-09	2.21e-08
hsa-mir-29c	MI0000735	Chr1	207801852	207801939	-	AUCUCUUACACAGGCUGACCGAUUUCUCCUGGUGUUCAGAGUCUGUUUUUGUCUAGCACCAUUUGAAAUCGGUUAUGAUGUAGGGGGA	2.31854	10.012	30.4289	3.46336e-08	2.14851e-07
hsa-mir-194-1	MI0000488	Chr1	220118157	220118241	-	AUGGUGUUAUCAAGUGUAACAGCAACUCCAUGUGGACUGUGUACCAAUUUCCAGUGGAGAUGCUGUUACUUUUGAUGGUUACCAA	1.52792	13.1041	24.6069	7.02979e-07	3.82006e-06
hsa-mir-215	MI0000291	Chr1	220117853	220117962	-	AUCAUUCAGAAAUGGUAUACAGGAAAAUGACCUAUGAAUUGACAGACAAUAUAGCUGAGUUUGUCUGUCAUUUCUUUAGGCCAAUAUUCUGUAUGACUGUGCUACUUCAA	4.18226	9.99646	27.6954	1.42001e-07	8.29524e-07
hsa-mir-3155a	MI0014183	Chr10	6152196	6152277	+	UCCGGGCAUCACCUCCCACUGCAGAGCCUGGGGAGCCGGACAGCUCCCUUCCCAGGCUCUGCAGUGGGAACUGAUGCCUGGA	-2.03068	-0.449934	6.80089	0.00911125	0.0260162
hsa-mir-3155b	MI0016839	Chr10	6152207	6152262	-	CCACUGCAGAGCCUGGGAAGGGAGCUGUCCGGCUCCCCAGGCUCUGCAGUGGGAGG	#N/A	#N/A	#N/A	#N/A	#N/A
hsa-mir-4679-1	MI0017310	Chr10	89063336	89063410	+	GUCUUUUUUCUGUGAUAGAGAUUCUUUGCUUUGUUAGAAACAAAAAGCAAAGAAUCUCUAUCACAGAAAAAAGAU	#N/A	#N/A	#N/A	#N/A	#N/A
hsa-mir-4679-2	MI0017311	Chr10	89063335	89063411	-	UAUCUUUUUUCUGUGAUAGAGAUUCUUUGCUUUUUGUUUCUAACAAAGCAAAGAAUCUCUAUCACAGAAAAAAGACG	#N/A	#N/A	#N/A	#N/A	#N/A
hsa-mir-3158-1	MI0014186	Chr10	101601417	101601497	+	AUUCAGGCCGGUCCUGCAGAGAGGAAGCCCUUCUGCUUACAGGUAUUGGAAGGGCUUCCUCUCUGCAGGACCGGCCUGAAU	-2.21322	-0.218866	11.6989	0.000625377	0.00221918
hsa-mir-3158-2	MI0014187	Chr10	101601417	101601497	-	AUUCAGGCCGGUCCUGCAGAGAGGAAGCCCUUCCAAUACCUGUAAGCAGAAGGGCUUCCUCUCUGCAGGACCGGCCUGAAU	#N/A	#N/A	#N/A	#N/A	#N/A
hsa-mir-6715a	MI0022548	Chr10	112299612	112299690	+	UGGGCUGCGUCCACAGGCACAGCCGGUUUGAGCAUUUUUACUGAAUUGCCAAACCAGUCGUGCCUGUGGGCACAACCUU	#N/A	#N/A	#N/A	#N/A	#N/A
hsa-mir-6715b	MI0022549	Chr10	112299612	112299688	-	GGUUGUGCCCACAGGCACGACUGGUUUGGCAAUUCAGUAAAAAUGCUCAAACCGGCUGUGCCUGUGGACGCAGCCCA	-2.60742	0.949839	28.3764	9.98762e-08	5.95857e-07
hsa-mir-3160-2	MI0014190	Chr11	46451807	46451887	+	ACCUGCCCUGGGCUUUCUAGUCUCAGCUCUCCUGACCAGCUGAGCUGGAGGAGAGCUGAGACUAGAAAGCCCAGGGCAGGU	#N/A	#N/A	#N/A	#N/A	#N/A
hsa-mir-3160-1	MI0014189	Chr11	46451805	46451889	-	GGACCUGCCCUGGGCUUUCUAGUCUCAGCUCUCCUCCAGCUCAGCUGGUCAGGAGAGCUGAGACUAGAAAGCCCAGGGCAGGUUC	#N/A	#N/A	#N/A	#N/A	#N/A
hsa-mir-6748	MI0022593	Chr11	62789815	62789885	+	UGGUGUGUGGGUGGGAAGGACUGGAUUUGAAAUGGUCCCACUCCUGACGAUCCUGUCCCUGUCUCCUACAG	-2.87399	-0.601844	13.6521	0.000219998	0.000854395
hsa-mir-6514	MI0022226	Chr11	62792702	62792771	-	UAUGGAGUGGACUUUCAGCUGGCAUUUACGAGUCAGAGUUCUUACAGAGCUGCCUGUUCUUCCACUCCAG	#N/A	#N/A	#N/A	#N/A	#N/A
hsa-mir-7113	MI0022964	Chr11	68032864	68032922	+	CUCCAGGGAGACAGUGUGUGAGGCCUCUUGCCAUGGCCUCCCUGCCCGCCUCUCUGCAG	-2.80281	-0.742352	7.88531	0.00498379	0.01471
hsa-mir-4691	MI0017324	Chr11	68033897	68033981	+	GGAGCACUCCCAGGUCCUCCAGGCCAUGAGCUGCGGCCCUGAUGUCUCUACUCCAGCCACGGACUGAGAGUGCAUAGGAGUGUCC	#N/A	#N/A	#N/A	#N/A	#N/A
hsa-mir-34b	MI0000742	Chr11	111512938	111513021	+	GUGCUCGGUUUGUAGGCAGUGUCAUUAGCUGAUUGUACUGUGGUGGUUACAAUCACUAACUCCACUGCCAUCAAAACAAGGCAC	#N/A	#N/A	#N/A	#N/A	#N/A
hsa-mir-34c	MI0000743	Chr11	111513439	111513515	+	AGUCUAGUUACUAGGCAGUGUAGUUAGCUGAUUGCUAAUAGUACCAAUCACUAACCACACGGCCAGGUAAAAAGAUU	#N/A	#N/A	#N/A	#N/A	#N/A
hsa-mir-200c	MI0000650	Chr12	6963699	6963766	+	CCCUCGUCUUACCCAGCAGUGUUUGGGUGCGGUUGGGAGUCUCUAAUACUGCCGGGUAAUGAUGGAGG	-2.00664	13.654	78.7415	7.07931e-19	1.03387e-17
hsa-mir-141	MI0000457	Chr12	6964097	6964191	+	CGGCCGGCCCUGGGUCCAUCUUCCAGUACAGUGUUGGAUGGUCUAAUUGUGAAGCUCCUAACACUGUCUGGUAAAGAUGGCUCCCGGGUGGGUUC	4.73359	10.9433	110.896	6.23517e-26	1.36589e-24
hsa-mir-6758	MI0022603	Chr12	57512688	57512750	+	UGGGCUAGAGAGGGGAAGGAUGUGAUGUGAGCAGAUGGUUCUCACUCAUUCUCCUCUGUCCAG	#N/A	#N/A	#N/A	#N/A	#N/A
hsa-mir-616	MI0003629	Chr12	57519163	57519259	-	UUAGGUAAUUCCUCCACUCAAAACCCUUCAGUGACUUCCAUGACAUGAAAUAGGAAGUCAUUGGAGGGUUUGAGCAGAGGAAUGACCUGUUUUAAAA	#N/A	#N/A	#N/A	#N/A	#N/A
hsa-mir-548c	MI0003630	Chr12	64622509	64622605	+	CAUUGGCAUCUAUUAGGUUGGUGCAAAAGUAAUUGCGGUUUUUGCCAUUACUUUCAGUAGCAAAAAUCUCAAUUACUUUUGCACCAACUUAAUACUU	#N/A	#N/A	#N/A	#N/A	#N/A
hsa-mir-548z	MI0016688	Chr12	64622509	64622605	-	AAGUAUUAAGUUGGUGCAAAAGUAAUUGAGAUUUUUGCUACUGAAAGUAAUGGCAAAAACCGCAAUUACUUUUGCACCAACCUAAUAGAUGCCAAUG	#N/A	#N/A	#N/A	#N/A	#N/A
hsa-mir-3913-2	MI0016418	Chr12	69584723	69584822	+	UGUCUAUAAUAAACUGAAAUAUUUGGGACUGAUCUUGAUGUCUGCCAAGGUUUUGGCAGACAUCAAGAUCAGUCCCAAAUAUUUCAGUUUAUUAUAAACA	#N/A	#N/A	#N/A	#N/A	#N/A
hsa-mir-3913-1	MI0016417	Chr12	69584722	69584823	-	UUGUUUAUAAUAAACUGAAAUAUUUGGGACUGAUCUUGAUGUCUGCCAAAACCUUGGCAGACAUCAAGAUCAGUCCCAAAUAUUUCAGUUUAUUAUAGACAG	2.3617	0.569774	5.97716	0.0144923	0.0398397
hsa-mir-5700	MI0019307	Chr12	94561789	94561859	+	UUAAUUAAUGCAUUAAAUUAUUGAAGGCCCUUGGGCACCCCAGGCCUUCAAUAAUUUAAUGCAUUUAUUGA	#N/A	#N/A	#N/A	#N/A	#N/A
hsa-mir-7844	MI0025514	Chr12	94571231	94571352	-	UGAUUGUGCGGACUCGUGUGUAAGAAAAACUAGGACUGUGUGGUGUAAAUAACUACAAUUCUCUUAACUCCGUAGCAGUUGCCAACUCAGUCCUUGUACUUCGUUAACACGAAUCUGUUUCA	#N/A	#N/A	#N/A	#N/A	#N/A
hsa-mir-331	MI0000812	Chr12	95308420	95308513	+	GAGUUUGGUUUUGUUUGGGUUUGUUCUAGGUAUGGUCCCAGGGAUCCCAGAUCAAACCAGGCCCCUGGGCCUAUCCUAGAACCAACCUAAGCUC	-1.65851	4.91954	32.0141	1.53059e-08	9.75405e-08
hsa-mir-3685	MI0016086	Chr12	95309923	95309984	+	GUACAUUUCCUACCCUACCUGAAGACUUGAGAUUAUAGUCUUUGGGGGGAUGGGCAAAGUAC	#N/A	#N/A	#N/A	#N/A	#N/A
hsa-mir-15a	MI0000069	Chr13	50049119	50049201	-	CCUUGGAGUAAAGUAGCAGCACAUAAUGGUUUGUGGAUUUUGAAAAGGUGCAGGCCAUAUUGUGCUGCCUCAAAAAUACAAGG	3.19813	7.05127	75.9534	2.9044e-18	3.91536e-17
hsa-mir-16-1	MI0000070	Chr13	50048973	50049061	-	GUCAGCAGUGCCUUAGCAGCACGUAAAUAUUGGCGUUAAGAUUCUAAAAUUAUCUCCAGUAUUAACUGUGCUGCUGAAGUAAGGUUGAC	3.90332	8.54539	64.5719	9.30752e-16	1.05235e-14
hsa-mir-342	MI0000805	Chr14	100109655	100109753	+	GAAACUGGGCUCAAGGUGAGGGGUGCUAUCUGUGAUUGAGGGACAUGGUUAAUGGAAUUGUCUCACACAGAAAUCGCACCCGUCACCUUGGCCUACUUA	-1.87303	6.39433	44.0898	3.13656e-11	2.63321e-10
hsa-mir-151b	MI0003772	Chr14	100109419	100109514	-	ACCUCUGAUGUGUCAGUCUCUCUUCAGGGCUCCCGAGACACAGAAACAGACACCUGCCCUCGAGGAGCUCACAGUCUAGACAAACAAACCCAGGGU	-1.56572	0.65151	12.8023	0.000346187	0.001284
hsa-mir-203a	MI0000283	Chr14	104117405	104117514	+	GUGUUGGGGACUCGCGCGCUGGGUCCAGUGGUUCUUAACAGUUCAACAGUUCUGUAGCGCAAUUGUGAAAUGUUUAGGACCACUAGACCCGGCGGGCGCGGCGACAGCGA	4.21292	14.4577	54.2767	1.74155e-13	1.71947e-12
hsa-mir-203b	MI0017343	Chr14	104117418	104117503	-	GCGCCCGCCGGGUCUAGUGGUCCUAAACAUUUCACAAUUGCGCUACAGAACUGUUGAACUGUUAAGAACCACUGGACCCAGCGCGC	5.7128	7.76141	56.4762	5.68824e-14	5.90734e-13
hsa-mir-7973-1	MI0025748	Chr15	51314034	51314109	+	UGUGACCCUAGAAUAAUUACCCAACGUCUCUGAGUCUCGGUUUUGAGAGGGUGAGUAAUUAUUCUAGGGUCACACA	#N/A	#N/A	#N/A	#N/A	#N/A
hsa-mir-7973-2	MI0025749	Chr15	51314032	51314107	-	UGUGACCCUAGAAUAAUUACUCACCCUCUCAAAACCGAGACUCAGAGACGUUGGGUAAUUAUUCUAGGGUCACACA	#N/A	#N/A	#N/A	#N/A	#N/A
hsa-mir-5587	MI0019144	Chr16	535316	535368	+	AUGGUCACCUCCGGGACUCAGCCCUGUGCUGAGCCCCGGGCAGUGUGAUCAUC	#N/A	#N/A	#N/A	#N/A	#N/A
hsa-mir-3176	MI0014210	Chr16	543277	543366	+	UGGCCUCUCCAGUCUGCAGCUCCCGGCAGCCUCGGGCCACACUCCCGGGAUCCCCAGGGACUGGCCUGGGACUACCGGGGGUGGCGGCCG	#N/A	#N/A	#N/A	#N/A	#N/A
hsa-mir-4516	MI0016882	Chr16	2133119	2133204	+	AGGGAGAAGGGUCGGGGCAGGGAGGGCAGGGCAGGCUCUGGGGUGGGGGGUCUGUGAGUCAGCCACGGCUCUGCCCACGUCUCCCC	#N/A	#N/A	#N/A	#N/A	#N/A
hsa-mir-3180-5	MI0016409	Chr16	2135977	2136129	-	GCUCCGCCCCACGUCGCAUGCGCCCCGGGAACGCGUGGGGCGGAGCUUCCGGAGGCCCCGCCCUGCUGCCGACCCUGUGGAGCGGAGGGUGAAGCCUCCGGAUGCCAGUCCCUCAUCGCUGGCCCGGUCGCGCUGUGGCGAAGGGGGCGGAGC	#N/A	#N/A	#N/A	#N/A	#N/A
hsa-mir-193b	MI0003137	Chr16	14303967	14304049	+	GUGGUCUCAGAAUCGGGGUUUUGAGGGCGAGAUGAGUUUAUGUUUUAUCCAACUGGCCCUCAAAGUCCCGCUUUUGGGGUCAU	-3.06864	5.36556	183.16	9.89835e-42	3.65197e-40
hsa-mir-365a	MI0000767	Chr16	14309285	14309371	+	ACCGCAGGGAAAAUGAGGGACUUUUGGGGGCAGAUGUGUUUCCAUUCCACUAUCAUAAUGCCCCUAAAAAUCCUUAUUGCUCUUGCA	-1.23293	4.8767	19.2376	1.15419e-05	5.37597e-05
hsa-mir-6511a-1	MI0022223	Chr16	14925937	14926003	+	CCUGCAGGCAGAAGUGGGGCUGACAGGGCAGAGGGUUGCGCCCCCUCACCAUCCCUUCUGCCUGCAG	#N/A	#N/A	#N/A	#N/A	#N/A
hsa-mir-6770-1	MI0022615	Chr16	14930820	14930879	+	UAUCCUGAGAAGGCACAGCUUGCACGUGACCUCCUGGGCCUGGCGGCUGUGUCUUCACAG	#N/A	#N/A	#N/A	#N/A	#N/A
hsa-mir-6511a-2	MI0023564	Chr16	16324588	16324654	+	CCUGCAGGCAGAAGUGGGGCUGACAGGGCAGAGGGUUGCGCCCCCUCACCAUCCCUUCUGCCUGCAG	#N/A	#N/A	#N/A	#N/A	#N/A
hsa-mir-6770-2	MI0026418	Chr16	16329305	16329364	+	UAUCCUGAGAAGGCACAGCUUGCACGUGACCUCCUGGGCCUGGCGGCUGUGUCUUCACAG	#N/A	#N/A	#N/A	#N/A	#N/A
hsa-mir-3179-4	MI0031510	Chr16	18494493	18494576	-	CAGGAUCACAGACGUUUAAAUUACACUCCUUCUGCUGUGCCUUACAGCAGUAGAAGGGGUGAAAUUUAAACGUCUGUGAUCCUG	#N/A	#N/A	#N/A	#N/A	#N/A
hsa-mir-3670-4	MI0031514	Chr16	18488301	18488365	-	UCUAGACUGGUAUAGCUGCUUUUGGAGCCUCACCUGCUGAGAGCUCACAGCUGUCCUUCUCUAGA	#N/A	#N/A	#N/A	#N/A	#N/A
hsa-mir-212	MI0000288	Chr17	2050271	2050380	-	CGGGGCACCCCGCCCGGACAGCGCGCCGGCACCUUGGCUCUAGACUGCUUACUGCCCGGGCCGCCCUCAGUAACAGUCUCCAGUCACGGCCACCGACGCCUGGCCCCGCC	#N/A	#N/A	#N/A	#N/A	#N/A
hsa-mir-132	MI0000449	Chr17	2049908	2050008	-	CCGCCCCCGCGUCUCCAGGGCAACCGUGGCUUUCGAUUGUUACUGUGGGAACUGGAGGUAACAGUCUACAGCCAUGGUCGCCCCGCAGCACGCCCACGCGC	-2.1547	6.52795	119.091	1.00017e-27	2.41765e-26
hsa-mir-6865	MI0022712	Chr17	4970086	4970150	-	AUCCAUAGGUGGCAGAGGAGGGACUUCAGAUGCUUCAUGACACCCUCUUUCCCUACCGCCUACAG	#N/A	#N/A	#N/A	#N/A	#N/A
hsa-mir-6864	MI0022711	Chr17	4969702	4969771	-	GAAAGUUGAAGGGACAAGUCAGAUAUGCCAUUAUGUGGGUCAUGAGGUGGUGAGACUUCUCUCCCUUCAG	#N/A	#N/A	#N/A	#N/A	#N/A
hsa-mir-4520-2	MI0017358	Chr17	6655449	6655502	+	CCUGCGUGUUUUCUGUCCAAAUCCUUUUCUGAUUUGGACAGAAAACACGCAGGU	#N/A	#N/A	#N/A	#N/A	#N/A
hsa-mir-4520-1	MI0016886	Chr17	6655440	6655509	-	GUGUGCCACCUGCGUGUUUUCUGUCCAAAUCAGAAAAGGAUUUGGACAGAAAACACGCAGGAAGAAGGAA	#N/A	#N/A	#N/A	#N/A	#N/A
hsa-mir-497	MI0003138	Chr17	7017911	7018022	-	CCACCCCGGUCCUGCUCCCGCCCCAGCAGCACACUGUGGUUUGUACGGCACUGUGGCCACGUCCAAACCACACUGUGGUGUUAGAGCGAGGGUGGGGGAGGCACCGCCGAGG	-1.01699	3.74756	11.8646	0.000572097	0.00205662
hsa-mir-195	MI0000489	Chr17	7017615	7017701	-	AGCUUCCCUGGCUCUAGCAGCACAGAAAUAUUGGCACAGGGAAGCGAGUCUGCCAAUAUUGGCUGUGCUGCUCCAGGCAGGGUGGUG	#N/A	#N/A	#N/A	#N/A	#N/A
hsa-mir-33b	MI0003646	Chr17	17813836	17813931	-	GCGGGCGGCCCCGCGGUGCAUUGCUGUUGCAUUGCACGUGUGUGAGGCGGGUGCAGUGCCUCGGCAGUGCAGCCCGGAGCCGGCCCCUGGCACCAC	2.88999	3.08451	13.1705	0.00028439	0.00107671
hsa-mir-6777	MI0022622	Chr17	17813480	17813545	-	UCAAGACGGGGAGUCAGGCAGUGGUGGAGAUGGAGAGCCCUGAGCCUCCACUCUCCUGGCCCCCAG	-3.11411	-0.430825	23.2168	1.44731e-06	7.57137e-06
hsa-mir-423	MI0001445	Chr17	30117079	30117172	+	AUAAAGGAAGUUAGGCUGAGGGGCAGAGAGCGAGACUUUUCUAUUUUCCAAAAGCUCGGUCUGAGGCCCCUCAGUCUUGCUUCCUAACCCGCGC	-3.04524	7.29894	348.691	8.17011e-78	7.63633e-76
hsa-mir-3184	MI0014226	Chr17	30117086	30117160	-	AAGCAAGACUGAGGGGCCUCAGACCGAGCUUUUGGAAAAUAGAAAAGUCUCGCUCUCUGCCCCUCAGCCUAACUU	#N/A	#N/A	#N/A	#N/A	#N/A
hsa-mir-4725	MI0017362	Chr17	31575269	31575358	+	GUGUCUCUCUGGAGACCCUGCAGCCUUCCCACCCACCAGGGAGCUUUCCAUGGGCUGUGGGGAAGGCGUCAGUGUCGGGUGAGGGAACAC	-2.57411	-0.730631	6.79074	0.00916318	0.0260216
hsa-mir-365b	MI0000769	Chr17	31575411	31575521	+	AGAGUGUUCAAGGACAGCAAGAAAAAUGAGGGACUUUCAGGGGCAGCUGUGUUUUCUGACUCAGUCAUAAUGCCCCUAAAAAUCCUUAUUGUUCUUGCAGUGUGCAUCGGG	-1.19777	4.87148	17.7124	2.56946e-05	0.000112927
hsa-mir-10226	MI0033056	Chr17	48032882	48032951	+	GAGGGAACUUCCAUGUGUCUGGGCUGGGAAACUGGAGUUCUCCACUGGGAGACAUUGAGUGUAUCCUUCU	#N/A	#N/A	#N/A	#N/A	#N/A
hsa-mir-152	MI0000462	Chr17	48037161	48037247	-	UGUCCCCCCCGGCCCAGGUUCUGUGAUACACUCCGACUCGGGCUCUGGAGCAGUCAGUGCAUGACAGAACUUGGGCCCGGAAGGACC	3.27696	7.63447	107.553	3.3684e-25	7.1553e-24
hsa-mir-4736	MI0017373	Chr17	58335976	58336022	-	AGGCAGGUUAUCUGGGCUGCCAUCUCCCACUGGCUGCUUGCCUGCCU	#N/A	#N/A	#N/A	#N/A	#N/A
hsa-mir-142	MI0000458	Chr17	58331232	58331318	-	GACAGUGCAGUCACCCAUAAAGUAGAAAGCACUACUAACAGCACUGGAGGGUGUAGUGUUUCCUACUUUAUGGAUGAGUGUACUGUG	6.58885	11.5333	78.6301	7.48993e-19	1.08256e-17
hsa-mir-5047	MI0017932	Chr17	64501214	64501313	-	GAAGCGCUUGCCUAGACGAGACACAGUGCAUAAAAACAACUUUUGGGGGACAGGUAUGUUUUCUUGCAGCUGCGGUUGUAAGGUCUUGGCAAGACAAGCA	#N/A	#N/A	#N/A	#N/A	#N/A
hsa-mir-3064	MI0017375	Chr17	64500774	64500839	-	GGUCUGGCUGUUGUGGUGUGCAAAACUCCGUACAUUGCUAUUUUGCCACACUGCAACACCUUACAG	#N/A	#N/A	#N/A	#N/A	#N/A
hsa-mir-548d-2	MI0003671	Chr17	67471489	67471585	-	GAGAGGGAAGAUUUAGGUUGGUGCAAAAGUAAUUGUGGUUUUUGCCAUUGAAAGUAAUGGCAAAAACCACAGUUUCUUUUGCACCAACCUAAUAAAA	#N/A	#N/A	#N/A	#N/A	#N/A
hsa-mir-548aa-2	MI0016690	Chr17	67471489	67471585	+	UUUUAUUAGGUUGGUGCAAAAGAAACUGUGGUUUUUGCCAUUACUUUCAAUGGCAAAAACCACAAUUACUUUUGCACCAACCUAAAUCUUCCCUCUC	#N/A	#N/A	#N/A	#N/A	#N/A
hsa-mir-4524b	MI0019114	Chr17	69099542	69099656	+	UAGCUGGGUGGAUGUGUUCUUUUGAAGGAUAGCAGCAUAAGCCUGUCUCAAAAUAAUUCUGCAGUGAGACAGGUUCAUGCUGCUAUCGUUCCAAAGAGGAAGGGUAAUCACUGUC	#N/A	#N/A	#N/A	#N/A	#N/A
hsa-mir-4524a	MI0016891	Chr17	69099564	69099632	-	GAACGAUAGCAGCAUGAACCUGUCUCACUGCAGAAUUAUUUUGAGACAGGCUUAUGCUGCUAUCCUUCA	-4.86751	-0.734869	53.0633	3.22965e-13	3.10135e-12
hsa-mir-1-2	MI0000437	Chr18	21829004	21829088	-	ACCUACUCAGAGUACAUACUUCUUUAUGUACCCAUAUGAACAUACAAUGCUAUGGAAUGUAAAGAAGUAUGUAUUUUUGGUAGGC	4.13179	4.56147	24.1868	8.74313e-07	4.71456e-06
hsa-mir-133a-1	MI0000450	Chr18	21825698	21825785	-	ACAAUGCUUUGCUAGAGCUGGUAAAAUGGAACCAAAUCGCCUCUUCAAUGGAUUUGGUCCCCUUCAACCAGCUGUAGCUAUGCAUUGA	-4.02401	4.05139	140.708	1.86422e-32	5.33396e-31
hsa-mir-5583-1	MI0019139	Chr18	39676721	39676779	+	AAACUAAUAUACCCAUAUUCUGGCUAGGUGAUCAUCAGAAUAUGGGUAUAUUAGUUUGG	#N/A	#N/A	#N/A	#N/A	#N/A
hsa-mir-5583-2	MI0019140	Chr18	39676719	39676777	-	AAACUAAUAUACCCAUAUUCUGAUGAUCACCUAGCCAGAAUAUGGGUAUAUUAGUUUGG	#N/A	#N/A	#N/A	#N/A	#N/A
hsa-mir-122	MI0000442	Chr18	58451074	58451158	+	CCUUAGCAGAGCUGUGGAGUGUGACAAUGGUGUUUGUGUCUAAACUAUCAAACGCCAUUAUCACACUAAAUAGCUACUGCUAGGC	#N/A	#N/A	#N/A	#N/A	#N/A
hsa-mir-122b	MI0017383	Chr18	58451080	58451152	-	CAGUAGCUAUUUAGUGUGAUAAUGGCGUUUGAUAGUUUAGACACAAACACCAUUGUCACACUCCACAGCUCUG	#N/A	#N/A	#N/A	#N/A	#N/A
hsa-mir-4745	MI0017384	Chr19	804940	805001	+	GUGAGUGGGGCUCCCGGGACGGCGCCCGCCCUGGCCCUGGCCCGGCGACGUCUCACGGUCCC	-2.42874	-0.457314	9.66818	0.00187487	0.0060427
hsa-mir-3187	MI0014231	Chr19	813584	813653	+	GCUGGCCCUGGGCAGCGUGUGGCUGAAGGUCACCAUGUUCUCCUUGGCCAUGGGGCUGCGCGGGGCCAGC	#N/A	#N/A	#N/A	#N/A	#N/A
hsa-mir-6789	MI0022634	Chr19	2235829	2235926	-	CGAGGUAGGGGCGUCCCGGGCGCGCGGGCGGGUCCCAGGCUGGGCCCCUCGGAGGCCGGGUGCUCACUGCCCCGUCCCGGCGCCCGUGUCUCCUCCAG	#N/A	#N/A	#N/A	#N/A	#N/A
hsa-mir-1227	MI0006316	Chr19	2234062	2234149	-	GUGGGGCCAGGCGGUGGUGGGCACUGCUGGGGUGGGCACAGCAGCCAUGCAGAGCGGGCAUUUGACCCCGUGCCACCCUUUUCCCCAG	-4.03457	-0.492198	48.7031	2.97796e-12	2.64247e-11
hsa-mir-6790	MI0022635	Chr19	6392921	6392983	-	GUGAGUGUGGAUUUGGCGGGGUUCGGGGGUUCCGACGGCGACCUCGGCGACCCCUCACUCACC	-3.12816	-0.833233	11.4561	0.00071259	0.00249763
hsa-mir-6885	MI0022732	Chr19	6389638	6389703	-	CCUGGAGGGGGGCACUGCGCAAGCAAAGCCAGGGACCCUGAGAGGCUUUGCUUCCUGCUCCCCUAG	-2.72707	-0.614749	10.905	0.000959065	0.00330371
hsa-mir-181c	MI0000271	Chr19	13874699	13874808	+	CGGAAAAUUUGCCAAGGGUUUGGGGGAACAUUCAACCUGUCGGUGAGUUUGGGCAGCUCAGGCAAACCAUCGACCGUUGAGUGGACCCUGAGGCCUGGAAUUGCCAUCCU	#N/A	#N/A	#N/A	#N/A	#N/A
hsa-mir-181d	MI0003139	Chr19	13874875	13875011	+	GUCCCCUCCCCUAGGCCACAGCCGAGGUCACAAUCAACAUUCAUUGUUGUCGGUGGGUUGUGAGGACUGAGGCCAGACCCACCGGGGGAUGAAUGUCACUGUGGCUGGGCCAGACACGGCUUAAGGGGAAUGGGGAC	1.69743	4.33319	11.1628	0.000834553	0.00289615
hsa-mir-642a	MI0003657	Chr19	45674928	45675024	+	AUCUGAGUUGGGAGGGUCCCUCUCCAAAUGUGUCUUGGGGUGGGGGAUCAAGACACAUUUGGAGAGGGAACCUCCCAACUCGGCCUCUGCCAUCAUU	-4.35912	2.6402	194.916	2.68691e-44	1.1772e-42
hsa-mir-642b	MI0016685	Chr19	45674932	45675008	-	GAGUUGGGAGGUUCCCUCUCCAAAUGUGUCUUGAUCCCCCACCCCAAGACACAUUUGGAGAGGGACCCUCCCAACUC	-2.95862	-0.753836	9.24739	0.00235831	0.00743001
hsa-mir-3190	MI0014235	Chr19	47226942	47227021	+	CUGGGGUCACCUGUCUGGCCAGCUACGUCCCCACGGCCCUUGUCAGUGUGGAAGGUAGACGGCCAGAGAGGUGACCCCGG	#N/A	#N/A	#N/A	#N/A	#N/A
hsa-mir-3191	MI0014236	Chr19	47226944	47227019	-	GGGGUCACCUCUCUGGCCGUCUACCUUCCACACUGACAAGGGCCGUGGGGACGUAGCUGGCCAGACAGGUGACCCC	-2.19827	-0.343752	9.97857	0.00158373	0.00523677
hsa-mir-10394	MI0033418	Chr19	58393364	58393446	+	UCUGCAGGUCCUGGUGAACGCCAUCAUCAACAGUGGUCCCCGGGAGGACUCCACACGCAUUGGGCGCGCCGGGACUGUGAGAC	#N/A	#N/A	#N/A	#N/A	#N/A
hsa-mir-4754	MI0017394	Chr19	58386770	58386858	-	ACGCGCCUGAUGCGGACCUGGGUUAGCGGAGUGAGGCCCAGUGGUCACCGCCGCCCUCCGCAGGUCCAGGUUGCCGUGCGCAUGUGCCU	-4.28183	-0.553846	60.0019	9.47655e-15	1.00652e-13
hsa-mir-216a	MI0000292	Chr2	55988950	55989059	-	GAUGGCUGUGAGUUGGCUUAAUCUCAGCUGGCAACUGUGAGAUGUUCAUACAAUCCCUCACAGUGGUCUCUGGGAUUAUGCUAAACAGAGCAAUUUCCUAGCCCUCACGA	#N/A	#N/A	#N/A	#N/A	#N/A
hsa-mir-217	MI0000293	Chr2	55982967	55983076	-	AGUAUAAUUAUUACAUAGUUUUUGAUGUCGCAGAUACUGCAUCAGGAACUGAUUGGAUAAGAAUCAGUCACCAUCAGUUCCUAAUGCAUUGCCUUCAGCAUCUAAACAAG	3.52415	5.27755	30.0621	4.18436e-08	2.57301e-07
hsa-mir-4433a	MI0016773	Chr2	64340759	64340839	+	CAUCCUCCUUACGUCCCACCCCCCACUCCUGUUUCUGGUGAAAUAUUCAAACAGGAGUGGGGGUGGGACAUAAGGAGGAUA	-3.59096	-0.685423	16.6307	4.54093e-05	0.000194097
hsa-mir-4433b	MI0025511	Chr2	64340747	64340848	-	UGUGUUCCCUAUCCUCCUUAUGUCCCACCCCCACUCCUGUUUGAAUAUUUCACCAGAAACAGGAGUGGGGGGUGGGACGUAAGGAGGAUGGGGGAAAGAACA	-3.55116	-0.608625	21.6779	3.22486e-06	1.60898e-05
hsa-mir-4773-1	MI0017415	Chr2	151368334	151368411	+	UGCUCCCCAGCCUUUCUAUGCUCCUGUUCUGCUUUAUUUCAUCAAAGCAGAACAGGAGCAUAGAAAGGCUGGGGAGCA	#N/A	#N/A	#N/A	#N/A	#N/A
hsa-mir-4773-2	MI0017416	Chr2	151368334	151368411	-	UGCUCCCCAGCCUUUCUAUGCUCCUGUUCUGCUUUGAUGAAAUAAAGCAGAACAGGAGCAUAGAAAGGCUGGGGAGCA	#N/A	#N/A	#N/A	#N/A	#N/A
hsa-mir-1245a	MI0006380	Chr2	188978092	188978161	+	AUUUAUGUAUAGGCCUUUAGAUCAUCUGAUGUUGAAUACUCUUUAAGUGAUCUAAAGGCCUACAUAUAAA	5.64824	1.15969	17.219	3.33093e-05	0.000144135
hsa-mir-1245b	MI0017431	Chr2	188978093	188978161	-	UUUAUAUGUAGGCCUUUAGAUCACUUAAAGAGUAUUCAACAUCAGAUGAUCUAAAGGCCUAUACAUAAA	#N/A	#N/A	#N/A	#N/A	#N/A
hsa-mir-3130-1	MI0014147	Chr2	206783234	206783308	-	CUUGUCAUGUCUUACCCAGUCUCCGGUGCAGCCUGUUGUCAAGGCUGCACCGGAGACUGGGUAAGACAUGACAAG	-1.53004	2.19746	13.9411	0.000188625	0.000735425
hsa-mir-3130-2	MI0014148	Chr2	206783234	206783308	+	CUUGUCAUGUCUUACCCAGUCUCCGGUGCAGCCUUGACAACAGGCUGCACCGGAGACUGGGUAAGACAUGACAAG	-1.71958	2.18368	17.8364	2.40734e-05	0.000106806
hsa-mir-4776-1	MI0017419	Chr2	212926257	212926336	+	CUAUAUGCAGUGGACCAGGAUGGCAAGGGCUCUCCUGAAAGGACAGUAGAGCCCUUGCCAUCCUGGUCCACUGCAUAUAG	#N/A	#N/A	#N/A	#N/A	#N/A
hsa-mir-4776-2	MI0017420	Chr2	212926257	212926336	-	CUAUAUGCAGUGGACCAGGAUGGCAAGGGCUCUACUGUCCUUUCAGGAGAGCCCUUGCCAUCCUGGUCCACUGCAUAUAG	#N/A	#N/A	#N/A	#N/A	#N/A
hsa-mir-103a-2	MI0000108	Chr20	3917494	3917571	+	UUGUGCUUUCAGCUUCUUUACAGUGCUGCCUUGUAGCAUUCAGGUCAAGCAGCAUUGUACAGGGCUAUGAAAGAACCA	#N/A	#N/A	#N/A	#N/A	#N/A
hsa-mir-103b-2	MI0007262	Chr20	3917502	3917563	-	UCAUAGCCCUGUACAAUGCUGCUUGACCUGAAUGCUACAAGGCAGCACUGUAAAGAAGCUGA	#N/A	#N/A	#N/A	#N/A	#N/A
hsa-mir-499a	MI0003183	Chr20	34990376	34990497	+	GCCCUGUCCCCUGUGCCUUGGGCGGGCGGCUGUUAAGACUUGCAGUGAUGUUUAACUCCUCUCCACGUGAACAUCACAGCAAGUCUGUGCUGCUUCCCGUCCCUACGCUGCCUGGGCAGGGU	5.73684	1.20916	9.92953	0.00162648	0.00532785
hsa-mir-499b	MI0017396	Chr20	34990400	34990472	-	GGAAGCAGCACAGACUUGCUGUGAUGUUCACGUGGAGAGGAGUUAAACAUCACUGCAAGUCUUAACAGCCGCC	#N/A	#N/A	#N/A	#N/A	#N/A
hsa-mir-298	MI0005523	Chr20	58818226	58818313	-	UCAGGUCUUCAGCAGAAGCAGGGAGGUUCUCCCAGUGGUUUUCCUUGACUGUGAGGAACUAGCCUGCUGCUUUGCUCAGGAGUGAGCU	#N/A	#N/A	#N/A	#N/A	#N/A
hsa-mir-296	MI0000747	Chr20	58817615	58817694	-	AGGACCCUUCCAGAGGGCCCCCCCUCAAUCCUGUUGUGCCUAAUUCAGAGGGUUGGGUGGAGGCUCUCCUGAAGGGCUCU	-2.62028	2.83921	34.1529	5.09466e-09	3.45059e-08
hsa-mir-647	MI0003662	Chr20	63942631	63942726	-	AGGAAGUGUUGGCCUGUGGCUGCACUCACUUCCUUCAGCCCCAGGAAGCCUUGGUCGGGGGCAGGAGGGAGGGUCAGGCAGGGCUGGGGGCCUGAC	#N/A	#N/A	#N/A	#N/A	#N/A
hsa-mir-1914	MI0008335	Chr20	63941465	63941544	-	CGUGUGAGCCCGCCCUGUGCCCGGCCCACUUCUGCUUCCUCUUAGCGCAGGAGGGGUCCCGCACUGGGAGGGGCCCUCAC	-2.51776	-0.645916	7.84808	0.00508748	0.0149845
hsa-mir-6724-2	MI0031516	Chr21	8249505	8249596	+	CGCUGCGCUUCUGGGCCCGCGGCGGGCGUGGGGCUGCCCGGGCCGGUCGACCAGCGCGCCGUAGCUCCCGAGGCCCGAGCCGCGACCCGCGG	#N/A	#N/A	#N/A	#N/A	#N/A
hsa-mir-10401	MI0033425	Chr21	8206563	8206618	+	CGUGUGGGAAGGCGUGGGGUGCGGACCCCGGCCCGACCUCGCCGUCCCGCCCGCCG	#N/A	#N/A	#N/A	#N/A	#N/A
hsa-mir-10401	MI0033425	Chr21	8250772	8250827	+	CGUGUGGGAAGGCGUGGGGUGCGGACCCCGGCCCGACCUCGCCGUCCCGCCCGCCG	#N/A	#N/A	#N/A	#N/A	#N/A
hsa-mir-10401	MI0033425	Chr21	8389610	8389665	+	CGUGUGGGAAGGCGUGGGGUGCGGACCCCGGCCCGACCUCGCCGUCCCGCCCGCCG	#N/A	#N/A	#N/A	#N/A	#N/A
hsa-mir-10401	MI0033425	Chr21	8433797	8433852	+	CGUGUGGGAAGGCGUGGGGUGCGGACCCCGGCCCGACCUCGCCGUCCCGCCCGCCG	#N/A	#N/A	#N/A	#N/A	#N/A
hsa-mir-6724-3	MI0031517	Chr21	8388362	8388453	+	CGCUGCGCUUCUGGGCCCGCGGCGGGCGUGGGGCUGCCCGGGCCGGUCGACCAGCGCGCCGUAGCUCCCGAGGCCCGAGCCGCGACCCGCGG	#N/A	#N/A	#N/A	#N/A	#N/A
hsa-mir-10401	MI0033425	Chr21	8206563	8206618	+	CGUGUGGGAAGGCGUGGGGUGCGGACCCCGGCCCGACCUCGCCGUCCCGCCCGCCG	#N/A	#N/A	#N/A	#N/A	#N/A
hsa-mir-10401	MI0033425	Chr21	8250772	8250827	+	CGUGUGGGAAGGCGUGGGGUGCGGACCCCGGCCCGACCUCGCCGUCCCGCCCGCCG	#N/A	#N/A	#N/A	#N/A	#N/A
hsa-mir-10401	MI0033425	Chr21	8389610	8389665	+	CGUGUGGGAAGGCGUGGGGUGCGGACCCCGGCCCGACCUCGCCGUCCCGCCCGCCG	#N/A	#N/A	#N/A	#N/A	#N/A
hsa-mir-10401	MI0033425	Chr21	8433797	8433852	+	CGUGUGGGAAGGCGUGGGGUGCGGACCCCGGCCCGACCUCGCCGUCCCGCCCGCCG	#N/A	#N/A	#N/A	#N/A	#N/A
hsa-mir-3648-2	MI0031512	Chr21	8986999	8987178	+	CGCGACUGCGGCGGCGGUGGUGGGGGGAGCCGCGGGGAUCGCCGAGGGCCGGUCGGCCGCCCCGGGUGCCGCGCGGUGCCGCCGGCGGCGGUGAGGCCCCGCGCGUGUGUCCCGGCUGCGGUCGGCCGCGCUCGAGGGGUCCCCGUGGCGUCCCCUUCCCCGCCGGCCGCCUUUCUCGCG	#N/A	#N/A	#N/A	#N/A	#N/A
hsa-mir-10396a	MI0033420	Chr21	8987617	8987665	+	GGCGGGGCUCGGAGCCGGGCUUCGGCCGGGCCCCGGGCCCUCGACCGGG	#N/A	#N/A	#N/A	#N/A	#N/A
hsa-mir-99a	MI0000101	Chr21	16539089	16539169	+	CCCAUUGGCAUAAACCCGUAGAUCCGAUCUUGUGGUGAAGUGGACCGCACAAGCUCGCUUCUAUGGGUCUGUGUCAGUGUG	#N/A	#N/A	#N/A	#N/A	#N/A
hsa-let-7c	MI0000064	Chr21	16539828	16539911	+	GCAUCCGGGUUGAGGUAGUAGGUUGUAUGGUUUAGAGUUACACCCUGGGAGUUAACUGUACAACCUUCUAGCUUUCCUUGGAGC	-2.77801	8.98788	89.2997	3.39309e-21	5.66323e-20
hsa-mir-3618	MI0016008	Chr22	20085746	20085833	+	UAAGCUGAGUGCAUUGUGAUUUCCAAUAAUUGAGGCAGUGGUUCUAAAAGCUGUCUACAUUAAUGAAAAGAGCAAUGUGGCCAGCUUG	#N/A	#N/A	#N/A	#N/A	#N/A
hsa-mir-1306	MI0006443	Chr22	20086058	20086142	+	GUGAGCAGUCUCCACCACCUCCCCUGCAAACGUCCAGUGGUGCAGAGGUAAUGGACGUUGGCUCUGGUGGUGAUGGACAGUCCGA	-4.1869	3.32683	461.844	1.90781e-102	2.67475e-100
hsa-mir-301b	MI0005568	Chr22	21652981	21653058	+	GCCGCAGGUGCUCUGACGAGGUUGCACUACUGUGCUCUGAGAAGCAGUGCAAUGAUAUUGUCAAAGCAUCUGGGACCA	4.03498	1.87663	14.9338	0.00011135	0.000453818
hsa-mir-130b	MI0000748	Chr22	21653304	21653385	+	GGCCUGCCCGACACUCUUUCCCUGUUGCACUACUAUAGGCCGCUGGGAAGCAGUGCAAUGAUGAAAGGGCAUCGGUCAGGUC	#N/A	#N/A	#N/A	#N/A	#N/A
hsa-mir-3199-2	MI0014248	Chr22	27920526	27920611	+	GUGACUCCCAGGGACUGCCUUAGGAGAAAGUUUCUGGAAUGUCAGAACUUCCAGAAACUUUCUCCUAAGGCAGUCCCUGGAGUCAC	-2.38985	0.015799	23.9906	9.68095e-07	5.18041e-06
hsa-mir-3199-1	MI0014247	Chr22	27920525	27920612	-	GGUGACUCCAGGGACUGCCUUAGGAGAAAGUUUCUGGAAGUUCUGACAUUCCAGAAACUUUCUCCUAAGGCAGUCCCUGGGAGUCACU	#N/A	#N/A	#N/A	#N/A	#N/A
hsa-mir-3909	MI0016413	Chr22	35335640	35335758	+	GGUAUGCUGUUGCGCUGUCCUUCCUCUGGGGAGCAGGCUCCGGGGGACAGGGAAAAGCACACAAGGAACUUGUCCUCUAGGGCCUGCAGUCUCAUGGGAGAGUGACAUGCACCAGGACC	-1.9571	-0.046544	11.618	0.000653172	0.00230667
hsa-mir-6069	MI0020346	Chr22	35336721	35336799	-	UGGUGACCCCUGGGCUAGGGCCUGCUGCCCCCUGCCCAGUGCAGGAGGGUGGAGGGUCACUCCUUAGGUGGUCCCAGUG	#N/A	#N/A	#N/A	#N/A	#N/A
hsa-mir-659	MI0003683	Chr22	37847678	37847774	-	UACCGACCCUCGAUUUGGUUCAGGACCUUCCCUGAACCAAGGAAGAGUCACAGUCUCUUCCUUGGUUCAGGGAGGGUCCCCAACAAUGUCCUCAUGG	#N/A	#N/A	#N/A	#N/A	#N/A
hsa-mir-658	MI0003682	Chr22	37844272	37844371	-	GCUCGGUUGCCGUGGUUGCGGGCCCUGCCCGCCCGCCAGCUCGCUGACAGCACGACUCAGGGCGGAGGGAAGUAGGUCCGUUGGUCGGUCGGGAACGAGG	-2.58067	-0.155838	19.0233	1.29129e-05	5.95521e-05
hsa-mir-191	MI0000465	Chr3	49020618	49020709	-	CGGCUGGACAGCGGGCAACGGAAUCCCAAAAGCAGCUGUUGUCUCCAGAGCAUUCCAGCUGCGCUUGGAUUUCGUCCCCUGCUCUCCUGCCU	-1.09604	9.63035	21.8022	3.02255e-06	1.51886e-05
hsa-mir-425	MI0001448	Chr3	49020148	49020234	-	GAAAGCGCUUUGGAAUGACACGAUCACUCCCGUUGAGUGGGCACCCGAGAAGCCAUCGGGAAUGUCGUGUCCGCCCAGUGCUCUUUC	#N/A	#N/A	#N/A	#N/A	#N/A
hsa-mir-15b	MI0000438	Chr3	160404588	160404685	+	UUGAGGCCUUAAAGUACUGUAGCAGCACAUCAUGGUUUACAUGCUACAGUCAAGAUGCGAAUCAUUAUUUGCUGCUCUAGAAAUUUAAGGAAAUUCAU	-2.4097	7.93073	151.984	6.38588e-35	1.98956e-33
hsa-mir-16-2	MI0000115	Chr3	160404745	160404825	+	GUUCCACUCUAGCAGCACGUAAAUAUUGGCGUAGUGAAAUAUAUAUUAAACACCAAUAUUACUGUGCUGCUUUAGUGUGAC	3.94585	8.56318	66.0888	4.31063e-16	4.99463e-15
hsa-mir-4450	MI0016795	Chr4	76573568	76573632	+	UGUCUGGGGAUUUGGAGAAGUGGUGAGCGCAGGUCUUUGGCACCAUCUCCCCUGGUCCCUUGGCU	#N/A	#N/A	#N/A	#N/A	#N/A
hsa-mir-548ah	MI0016796	Chr4	76575551	76575626	+	AGGUUGGUGCAAAAGUGAUUGCAGUGUUUGCCAAUAAAAGUAAUGACAAAAACUGCAGUUACUUUUGCACCAGCCC	#N/A	#N/A	#N/A	#N/A	#N/A
hsa-mir-3688-2	MI0017447	Chr4	159128805	159128891	+	UCACUUUAAAGAGUGGCAAAGUCUUUCCAUAUGUGUAACAGACAUACAUACAUACAUAUGGAAAGACUUUGCCACUCUUGAAAGUGA	#N/A	#N/A	#N/A	#N/A	#N/A
hsa-mir-3688-1	MI0016089	Chr4	159128802	159128894	-	UCUUCACUUUCAAGAGUGGCAAAGUCUUUCCAUAUGUAUGUAUGUAUGUCUGUUACACAUAUGGAAAGACUUUGCCACUCUUUAAAGUGAAGA	#N/A	#N/A	#N/A	#N/A	#N/A
hsa-mir-143	MI0000459	Chr5	149428918	149429023	+	GCGCAGCGCCCUGUCUCCCAGCCUGAGGUGCAGUGCUGCAUCUCUGGUCAGUUGGGAGUCUGAGAUGAAGCACUGUAGCUCAGGAAGAGAGAAGUUGUUCUGCAGC	2.61777	17.1512	27.8922	1.28267e-07	7.55588e-07
hsa-mir-145	MI0000461	Chr5	149430646	149430733	+	CACCUUGUCCUCACGGUCCAGUUUUCCCAGGAAUCCCUUAGAUGCUAAGAUGGGGAUUCCUGGAAAUACUGUUCUUGAGGUCAUGGUU	-3.86229	11.716	261.376	8.60131e-59	6.02952e-57
hsa-mir-103b-1	MI0007261	Chr5	168560904	168560965	+	UCAUAGCCCUGUACAAUGCUGCUUGAUCCAUAUGCAACAAGGCAGCACUGUAAAGAAGCCGA	#N/A	#N/A	#N/A	#N/A	#N/A
hsa-mir-103a-1	MI0000109	Chr5	168560896	168560973	-	UACUGCCCUCGGCUUCUUUACAGUGCUGCCUUGUUGCAUAUGGAUCAAGCAGCAUUGUACAGGGCUAUGAAGGCAUUG	#N/A	#N/A	#N/A	#N/A	#N/A
hsa-mir-5683	MI0019284	Chr6	6169334	6169409	+	GGAGCUUGUUACAGAUGCAGAUUCUCUGACUUCUUACUGCACCAGUGAAGUCAGGAUCUGCAUUUGAAUAAGACCC	6.26322	1.67372	10.0404	0.00153141	0.00508776
hsa-mir-7853	MI0025523	Chr6	6169304	6169435	-	UCUCACACUUCAAUAGGCAUUGUCUGGGGUCUUAUUCAAAUGCAGAUCCUGACUUCACUGGUGCAGUAAGAAGUCAGAGAAUCUGCAUCUGUAACAAGCUCCCAGGUGAUGAUGGUGCUGCUGGUGUGCAGA	#N/A	#N/A	#N/A	#N/A	#N/A
hsa-mir-6833	MI0022678	Chr6	32179816	32179876	+	AAACGGUGUGGAAGAUGGGAGGAGAAAAAUCCCUGUUAACUUUCUCUCUCCACUUCCUCAG	-3.85403	-0.478746	50.2589	1.34743e-12	1.21096e-11
hsa-mir-6721	MI0022556	Chr6	32170030	32170116	-	CCCUCAUCUCUGGGCAGGGGCUUAUUGUAGGAGUCUCUGAAGAGAGCUGUGGACUGACCUGCUUUAACCCUUCCCCAGGUUCCCAUU	-3.29176	-0.753833	14.1524	0.000168586	0.000667678
hsa-mir-6834	MI0022679	Chr6	33290245	33290325	+	GUGAGGGACUGGGAUUUGUGGGGCGAGGAGGGACCUGUACUAGCCAUGGUUCUGAUCACAUAUGUCCCAUCCCUCCAUCAG	#N/A	#N/A	#N/A	#N/A	#N/A
hsa-mir-6873	MI0022720	Chr6	33287227	33287289	-	CCCAGCAGAGGGAAUACAGAGGGCAAUCAGGACUGGGUCAUUCUCUCUGUCUUUCUCUCUCAG	#N/A	#N/A	#N/A	#N/A	#N/A
hsa-mir-206	MI0000490	Chr6	52144349	52144434	+	UGCUUCCCGAGGCCACAUGCUUCUUUAUAUCCCCAUAUGGAUUACUUUGCUAUGGAAUGUAAGGAAGUGUGUGGUUUCGGCAAGUG	#N/A	#N/A	#N/A	#N/A	#N/A
hsa-mir-133b	MI0000822	Chr6	52148923	52149041	+	CCUCAGAAGAAAGAUGCCCCCUGCUCUGGCUGGUCAAACGGAACCAAGUCCGUCUUCCUGAGAGGUUUGGUCCCCUUCAACCAGCUACAGCAGGGCUGGCAAUGCCCAGUCCUUGGAGA	-2.64712	2.4891	26.154	3.15247e-07	1.775e-06
hsa-mir-550a-1	MI0003600	Chr7	30289794	30289890	+	UGAUGCUUUGCUGGCUGGUGCAGUGCCUGAGGGAGUAAGAGCCCUGUUGUUGUAAGAUAGUGUCUUACUCCCUCAGGCACAUCUCCAACAAGUCUCU	#N/A	#N/A	#N/A	#N/A	#N/A
hsa-mir-550b-1	MI0016686	Chr7	30289794	30289890	-	AGAGACUUGUUGGAGAUGUGCCUGAGGGAGUAAGACACUAUCUUACAACAACAGGGCUCUUACUCCCUCAGGCACUGCACCAGCCAGCAAAGCAUCA	-3.02715	-0.769736	10.3938	0.00126439	0.00423073
hsa-mir-550a-2	MI0003601	Chr7	32732981	32733077	+	UGAUGCUUUGCUGGCUGGUGCAGUGCCUGAGGGAGUAAGAGCCCUGUUGUUGUCAGAUAGUGUCUUACUCCCUCAGGCACAUCUCCAGCGAGUCUCU	#N/A	#N/A	#N/A	#N/A	#N/A
hsa-mir-550b-2	MI0016687	Chr7	32732981	32733077	-	AGAGACUCGCUGGAGAUGUGCCUGAGGGAGUAAGACACUAUCUGACAACAACAGGGCUCUUACUCCCUCAGGCACUGCACCAGCCAGCAAAGCAUCA	-2.91032	-0.815372	8.95591	0.00276574	0.00857868
hsa-mir-3914-2	MI0016421	Chr7	71307674	71307768	+	GAGUUCCUACUCAACUUCUCAUUUUCUGGUUCCUUCUACCAAGUUAAGCAUACUCAUUAGAAGGAACCAGAAAAUGAGAAGUUAAAUCUGAAGUC	#N/A	#N/A	#N/A	#N/A	#N/A
hsa-mir-3914-1	MI0016419	Chr7	71307672	71307770	-	UGGACUUCAGAUUUAACUUCUCAUUUUCUGGUUCCUUCUAAUGAGUAUGCUUAACUUGGUAGAAGGAACCAGAAAAUGAGAAGUUGAGUAGGAACUCUA	-2.99384	-0.819866	8.32633	0.00390746	0.0117307
[truncated: 58 more rows]

## Sheet: ESCA
ID	Accession	Chromosome	Start	End	Strand	Sequence	logFC	logCPM	LR	PValue	FDR
[truncated: 493 more rows]

## Sheet: HNSC
ID	Accession	Chromosome	Start	End	Strand	Sequence	logFC	logCPM	LR	PValue	FDR
[truncated: 493 more rows]

[truncated: 12 more sheets: KICH, KIRC, KIRP, LIHC, LUAD, LUSC, PCPG, PRAD, READ, STAD, THCA, UCEC]
