# Supplementary material for: CmirC update 2024: a multi-omics database for clustered miRNAs
Source: Funct Integr Genomics. 2024 Aug 1;24(4):133. doi: 10.1007/s10142-024-01410-2 (PMC11291601; doi:10.1007/s10142-024-01410-2)
Supplement: Supplementary file 4 — Supplementary Material 4 [file 10142_2024_1410_MOESM4_ESM.xlsx]

## Sheet: Sheet1
CmirC update 2024: A multi-omics database for clustered miRNAs
Akshay Pramod Ware1,2, Kapaettu Satyamoorthy3, and Bobby Paul1*
1Department of Bioinformatics, Manipal School of Life Sciences, Manipal Academy of Higher Education, Manipal – 576104, Karnataka, India.
2Institute of Cardiovascular Regeneration, Johann Wolfgang Goethe University, Theodor-Stern-Kai 7, Frankfurt Am Main – 60590, Germany.
3SDM College of Medical Sciences and Hospital, Shri Dharmasthala Manjunatheshwara (SDM) University, Manjushree Nagar, Sattur, Dharwad, Karnataka, 580009, India.
*Correspondence to: bobby.paul@manipal.edu
Supplementary File 3

## Sheet: CpG
Chromosome	Cluster Start	Cluster End	miRNA Cluster	CpGI Start	CpGI End	CpG Island
chr1	1167104	1169087	hsa-miR-429/200b	1162663	1165204	CpG:_180
chr1	1167104	1169087	hsa-miR-429/200b	1157831	1158096	CpG:_25
chr10	6152196	6152262	hsa-miR-3155b/3155a	6144557	6145892	CpG:_153
chr10	101601417	101601497	hsa-miR-3158-2/3158-1	101587922	101588458	CpG:_38
chr11	64891137	64902455	hsa-miR-6749/192	64877957	64879094	CpG:_124
chr11	62789815	62792771	hsa-miR-6514/6748	62786594	62787790	CpG:_138
chr11	68032864	68033981	hsa-miR-4691/7113	68021575	68021871	CpG:_24
chr11	62789815	62792771	hsa-miR-6514/6748	62771529	62771850	CpG:_27
chr11	68032864	68033981	hsa-miR-4691/7113	68030335	68030946	CpG:_50
chr11	111512938	111513515	hsa-miR-34c/34b	111512443	111513167	CpG:_79
chr12	64622509	64622605	hsa-miR-548z/548c	64610013	64611119	CpG:_132
chr12	6963699	6964191	hsa-miR-141/200c	6943986	6944764	CpG:_66
chr13	91350605	91351391	hsa-miR-92a-1/17	91347287	91349187	CpG:_252
chr14	104117405	104117503	hsa-miR-203b/203a	104116699	104118237	CpG:_173
chr14	105857513	105859553	hsa-miR-4537/4539	105850536	105850823	CpG:_18
chr14	105857513	105859553	hsa-miR-4537/4539	105855645	105855897	CpG:_20
chr14	104117405	104117503	hsa-miR-203b/203a	104103162	104103443	CpG:_23
chr15	88608107	88611924	hsa-miR-3529/1179	88604429	88605967	CpG:_100
chr16	14303967	14309371	hsa-miR-365a/193b	14301747	14303218	CpG:_134
chr16	18402178	18411977	hsa-miR-3179-3/3180-3	18401247	18402541	CpG:_152
chr16	14925937	14930879	hsa-miR-6770-1/6511a-1	14910949	14912243	CpG:_166
chr16	16324588	16329364	hsa-miR-6770-2/6511a-2	16309604	16310899	CpG:_168
chr16	2133119	2136129	hsa-miR-3180-5/4516	2127127	2127328	CpG:_17
chr16	14925937	14930879	hsa-miR-6770-1/6511a-1	14924948	14925175	CpG:_18
chr16	2270713	2274691	hsa-miR-4717/3677	2267444	2268999	CpG:_182
chr16	2133119	2136129	hsa-miR-3180-5/4516	2115377	2115619	CpG:_19
chr16	16324588	16329364	hsa-miR-6770-2/6511a-2	16323599	16323853	CpG:_19
chr16	14925937	14930879	hsa-miR-6770-1/6511a-1	14921274	14921527	CpG:_20
chr16	16324588	16329364	hsa-miR-6770-2/6511a-2	16319925	16320178	CpG:_20
chr16	535316	543366	hsa-miR-3176/5587	526725	528511	CpG:_218
chr16	18402178	18411977	hsa-miR-3179-3/3180-3	18391973	18392270	CpG:_23
chr16	18402178	18411977	hsa-miR-3179-3/3180-3	18384422	18388684	CpG:_312
chr16	535316	543366	hsa-miR-3176/5587	515420	515781	CpG:_39
chr16	14925937	14930879	hsa-miR-6770-1/6511a-1	14918851	14919419	CpG:_43
chr16	18402178	18411977	hsa-miR-3179-3/3180-3	18394077	18394690	CpG:_47
chr16	14303967	14309371	hsa-miR-365a/193b	14285467	14285890	CpG:_54
chr16	16324588	16329364	hsa-miR-6770-2/6511a-2	16324448	16325440	CpG:_71
chr16	14925937	14930879	hsa-miR-6770-1/6511a-1	14925797	14926789	CpG:_73
chr16	2270713	2274691	hsa-miR-4717/3677	2251156	2251968	CpG:_97
chr17	4969702	4970150	hsa-miR-6865/6864	4966894	4968415	CpG:_105
chr17	17813480	17813931	hsa-miR-33b/6777	17809597	17811069	CpG:_129
chr17	48032882	48037247	hsa-miR-152/10226	48023431	48025538	CpG:_150
chr17	81125276	81133308	hsa-miR-1250/657	81112521	81112723	CpG:_17
chr17	81125276	81133308	hsa-miR-1250/657	81110536	81110761	CpG:_17
chr17	17813480	17813931	hsa-miR-33b/6777	17797556	17797766	CpG:_18
chr17	31575269	31575521	hsa-miR-365b/4725	31558802	31560358	CpG:_196
chr17	28861369	28861730	hsa-miR-4732/451a	28842508	28842776	CpG:_21
chr17	6655440	6655502	hsa-miR-4520-2/4520-1	6654902	6655122	CpG:_23
chr17	4969702	4970150	hsa-miR-6865/6864	4947647	4950612	CpG:_231
chr17	81125276	81133308	hsa-miR-1250/657	81119523	81122877	CpG:_251
chr17	30117079	30117160	hsa-miR-3184/423	30116728	30116993	CpG:_27
chr17	28861369	28861730	hsa-miR-4732/451a	28854961	28855301	CpG:_29
chr17	17813480	17813931	hsa-miR-33b/6777	17794396	17794749	CpG:_30
chr17	7017615	7018022	hsa-miR-497/195	7012505	7012882	CpG:_32
chr17	64500774	64501313	hsa-miR-5047/3064	64496764	64497205	CpG:_43
chr17	17813480	17813931	hsa-miR-33b/6777	17812382	17812905	CpG:_49
chr17	58331232	58336022	hsa-miR-4736/142	58324367	58324982	CpG:_54
chr17	2049908	2050380	hsa-miR-212/132	2029844	2030558	CpG:_60
chr17	6655440	6655502	hsa-miR-4520-2/4520-1	6651512	6652266	CpG:_76
chr17	2049908	2050380	hsa-miR-212/132	2049625	2059334	CpG:_810
chr17	7017615	7018022	hsa-miR-497/195	7014250	7015220	CpG:_85
chr17	2049908	2050380	hsa-miR-212/132	2041562	2042327	CpG:_91
chr17	6655440	6655502	hsa-miR-4520-2/4520-1	6640034	6641243	CpG:_99
chr19	58386770	58393446	hsa-miR-10394/4754	58386354	58387511	CpG:_104
chr19	13874699	13875011	hsa-miR-181d/181c	13864854	13866104	CpG:_152
chr19	2234062	2235926	hsa-miR-6789/1227	2226194	2228343	CpG:_169
chr19	804940	813653	hsa-miR-3187/4745	795360	795561	CpG:_17
chr19	45674928	45675008	hsa-miR-642b/642a	45671114	45671317	CpG:_17
chr19	55230885	55245250	hsa-miR-6803/6804	55216977	55217261	CpG:_20
chr19	804940	813653	hsa-miR-3187/4745	804218	806663	CpG:_201
chr19	58386770	58393446	hsa-miR-10394/4754	58367019	58369228	CpG:_223
chr19	53787675	53788773	hsa-miR-373/371a	53768486	53768705	CpG:_23
chr19	2234062	2235926	hsa-miR-6789/1227	2213861	2214143	CpG:_23
chr19	804940	813653	hsa-miR-3187/4745	796506	798936	CpG:_247
chr19	2234062	2235926	hsa-miR-6789/1227	2217743	2218097	CpG:_26
chr19	13874699	13875011	hsa-miR-181d/181c	13873792	13874104	CpG:_29
chr19	2234062	2235926	hsa-miR-6789/1227	2216347	2216742	CpG:_29
chr19	51692612	51693339	hsa-miR-125a/99b	51689332	51689583	CpG:_35
chr19	13874699	13875011	hsa-miR-181d/181c	13872782	13873338	CpG:_41
chr19	13836287	13836659	hsa-miR-23a/24-2	13833325	13833881	CpG:_51
chr19	13836287	13836659	hsa-miR-23a/24-2	13830250	13830955	CpG:_65
chr19	2234062	2235926	hsa-miR-6789/1227	2229738	2230595	CpG:_71
chr19	53666679	53706336	hsa-miR-526a-1/512-1	53647822	53648987	CpG:_86
chr19	47226942	47227019	hsa-miR-3191/3190	47226060	47226776	CpG:_88
chr19	58386770	58393446	hsa-miR-10394/4754	58380467	58381274	CpG:_89
chr19	6389638	6392983	hsa-miR-6790/6885	6372711	6373620	CpG:_91
chr2	206783234	206783308	hsa-miR-3130-2/3130-1	206765154	206765436	CpG:_26
chr20	34990376	34990472	hsa-miR-499b/499a	34979611	34979976	CpG:_27
chr20	63941465	63942726	hsa-miR-647/1914	63931192	63931509	CpG:_28
chr20	63941465	63942726	hsa-miR-647/1914	63929222	63929740	CpG:_51
chr20	63941465	63942726	hsa-miR-647/1914	63940385	63941203	CpG:_66
chr20	63919449	63919939	hsa-miR-941-5/941-1	63919360	63920170	CpG:_72
chr20	63941465	63942726	hsa-miR-647/1914	63938444	63939423	CpG:_84
chr21	8206563	8436374	hsa-miR-10396b/10401	8202148	8202403	CpG:_19
chr21	8205315	8208652	hsa-miR-3648-1/6724-1	8202148	8202403	CpG:_19
chr21	8206563	8249596	hsa-miR-6724-2/10401	8202148	8202403	CpG:_19
chr21	8206563	8388453	hsa-miR-6724-3/10401	8202148	8202403	CpG:_19
chr21	8986999	8987665	hsa-miR-10396a/3648-2	8986609	8987978	CpG:_253
chr21	8206563	8436374	hsa-miR-10396b/10401	8196730	8197514	CpG:_51
chr21	8205315	8208652	hsa-miR-3648-1/6724-1	8196730	8197514	CpG:_51
chr21	8206563	8249596	hsa-miR-6724-2/10401	8196730	8197514	CpG:_51
chr21	8206563	8388453	hsa-miR-6724-3/10401	8196730	8197514	CpG:_51
chr22	27920525	27920611	hsa-miR-3199-2/3199-1	27918600	27919970	CpG:_108
chr22	21652981	21653385	hsa-miR-130b/301b	21641952	21643043	CpG:_115
chr22	37844272	37847774	hsa-miR-659/658	37824582	37825612	CpG:_125
chr22	20085746	20086142	hsa-miR-1306/3618	20079883	20080679	CpG:_126
chr22	37844272	37847774	hsa-miR-659/658	37843785	37844402	CpG:_79
chr22	21652981	21653385	hsa-miR-130b/301b	21651790	21652759	CpG:_83
chr3	49020148	49020709	hsa-miR-191/425	49017781	49018884	CpG:_114
chr3	160404588	160404825	hsa-miR-16-2/15b	160399224	160401090	CpG:_159
chr3	49020148	49020709	hsa-miR-191/425	49006699	49007793	CpG:_99
chr4	112647874	112648557	hsa-miR-302b/367	112636876	112637525	CpG:_59
chr6	32170030	32179876	hsa-miR-6833/6721	32150324	32150767	CpG:_35
chr6	32170030	32179876	hsa-miR-6833/6721	32166683	32167419	CpG:_49
chr6	32170030	32179876	hsa-miR-6833/6721	32154052	32154752	CpG:_51
chr6	33287227	33290325	hsa-miR-6834/6873	33271549	33272322	CpG:_53
chr6	33287227	33290325	hsa-miR-6834/6873	33276900	33277497	CpG:_73
chr7	32732981	32733077	hsa-miR-550b-2/550a-2	32727923	32729236	CpG:_160
chr7	30289794	30289890	hsa-miR-550b-1/550a-1	30284301	30286025	CpG:_207
chr7	100093560	100094074	hsa-miR-106b/25	100088917	100089216	CpG:_21
chr7	102465742	102471531	hsa-miR-4467/5090	102457480	102457937	CpG:_37
chr7	129770383	129775014	hsa-miR-183/182	129762380	129762951	CpG:_53
chr7	100093560	100094074	hsa-miR-106b/25	100081145	100082079	CpG:_81
chr7	102465742	102471531	hsa-miR-4467/5090	102464676	102465335	CpG:_83
chr8	144394149	144400345	hsa-miR-6849/939	144373725	144374899	CpG:_100
chr8	144394149	144400345	hsa-miR-6849/939	144392060	144393786	CpG:_129
chr8	41660441	41660507	hsa-miR-486-2/486-1	41649997	41650349	CpG:_27
chr8	41660441	41660507	hsa-miR-486-2/486-1	41646397	41646747	CpG:_38
chr8	41660441	41660507	hsa-miR-486-2/486-1	41653468	41654191	CpG:_64
chr9	127785833	127786007	hsa-miR-2861/3960	127784985	127786838	CpG:_143
chr9	94175957	94178920	hsa-let-7d/let-7a-1	94165838	94167179	CpG:_150
chr9	128392618	128392708	hsa-miR-219b/219a-2	128392067	128393644	CpG:_152
chr9	128244721	128245030	hsa-miR-3154/199b	128233931	128234164	CpG:_21
chr9	134849298	134850807	hsa-miR-3689f/3689c	134839040	134839356	CpG:_23
chr9	134849298	134850807	hsa-miR-3689f/3689c	134842307	134842629	CpG:_25
chr9	127785833	127786007	hsa-miR-2861/3960	127771174	127771603	CpG:_41
