# Supplementary material for: CmirC update 2024: a multi-omics database for clustered miRNAs
Source: Funct Integr Genomics. 2024 Aug 1;24(4):133. doi: 10.1007/s10142-024-01410-2 (PMC11291601; doi:10.1007/s10142-024-01410-2)
Supplement: Supplementary file 5 — Supplementary Material 5 [file 10142_2024_1410_MOESM5_ESM.xlsx]

## Sheet: Sheet1
CmirC update 2024: A multi-omics database for clustered miRNAs
Akshay Pramod Ware1,2, Kapaettu Satyamoorthy3, and Bobby Paul1*
1Department of Bioinformatics, Manipal School of Life Sciences, Manipal Academy of Higher Education, Manipal – 576104, Karnataka, India.
2Institute of Cardiovascular Regeneration, Johann Wolfgang Goethe University, Theodor-Stern-Kai 7, Frankfurt Am Main – 60590, Germany.
3SDM College of Medical Sciences and Hospital, Shri Dharmasthala Manjunatheshwara (SDM) University, Manjushree Nagar, Sattur, Dharwad, Karnataka, 580009, India.
*Correspondence to: bobby.paul@manipal.edu
Supplementary File 4

## Sheet: BLCA
Chromosome	miRNA Cluster	Cluster Start	Cluster End	CpG Island	Island Start	Island End	Probe	Probe Start	Probe End	Log2FC	p value	adj pvalue
chr1	hsa-miR-429/200b	1167104	1169087	CpG:_180	1162663	1165204	cg00207921	1163612	1163613	-1.03857	1.353e-11	5.80479e-10
							cg08090385	1164203	1164204	-0.823064	1.0587e-09	1.41863e-08
							cg08474826	1164250	1164251	-0.933261	1.93119e-11	7.28041e-10
							cg14166948	1164183	1164184	-0.774753	2.47426e-10	4.51532e-09
							cg18792131	1163786	1163787	-1.15746	1.77773e-10	3.50611e-09
							cg20544808	1163671	1163672	-0.923608	3.06611e-11	9.91064e-10
							cg21475076	1165113	1165114	-1.07228	5.39008e-10	8.27924e-09
							cg22521151	1163520	1163521	-0.727286	2.95671e-11	9.66349e-10
chr9	hsa-miR-203b/203a	104117405	104117503	CpG:_23	134839040	134839356	cg05328939	134839179	134839180	-0.520564	1.25812e-09	1.63381e-08
							cg14582636	134839334	134839335	-0.483388	7.26731e-09	7.01618e-08
chr9	hsa-miR-429/200b	1167104	1169087	CpG:_25	134842307	134842629	cg13649103	134842492	134842493	-0.596053	2.02659e-08	1.68249e-07
chr17	hsa-miR-1250/657	81125276	81133308	CpG:_251	81119523	81122877	cg02460935	81120615	81120616	-0.58312	2.67342e-09	3.02989e-08
chr17	hsa-miR-212/132	2049908	2050380	CpG:_810	2049625	2059334	cg20664636	2056302	2056303	0.801616	2.07095e-05	7.68235e-05

## Sheet: BRCA
Chromosome	miRNA Cluster	Cluster Start	Cluster End	CpG Island	Island Start	island End	Probe	Probe Start	Probe End	Log2FC	p value	adj pvalue
chr19	hsa-miR-181d/181c	13874699	13875011	CpG:_41	13872782	13873338	cg16005540	13872999	13873000	2.83083	5.30841e-32	1.19442e-30
							cg17926950	13872799	13872800	1.61054	5.0828e-34	1.51797e-32
chr16	hsa-miR-3180-5/4516	2133119	2136129	CpG:_17	2127127	2127328	cg03494430	2127268	2127269	0.508166	3.92577e-40	3.65338e-38
chr17	hsa-miR-33b/6777	17813480	17813931	CpG:_129	17809597	17811069	cg09015921	17811033	17811034	-0.522536	8.89589e-14	3.7161e-13
							cg11108115	32167409	32167410	-0.606791	5.61217e-14	2.38078e-13
							cg27198013	17810979	17810980	-0.496491	5.54426e-13	2.18552e-12
chr1	hsa-miR-429/200b	1167104	1169087	CpG:_180	1162663	1165204	cg08090385	1164203	1164204	-0.575343	3.80542e-36	1.59777e-34
							cg18792131	1163786	1163787	-0.788088	3.2897e-33	8.71102e-32
chr22	hsa-miR-659/658	37844272	37847774	CpG:_125	37824582	37825612	cg07416664	37825478	37825479	0.574087	6.75662e-35	2.30962e-33
							cg07879739	37825180	37825181	1.61355	8.61411e-26	9.64129e-25
							cg25887069	37825002	37825003	2.0734	1.32321e-24	1.32331e-23

## Sheet: COAD
Chromosome	miRNA Cluster	Cluster Start	Cluster End	CpG Island	Island Start	island End	Probe	Probe Start	Probe End	Log2FC	p value	adj pvalue
chr19	hsa-miR-203b/203a	104117405	104117503	CpG:_23	2213861	2214143	cg07385220	2213934	2213935	0.564592	6.2404e-16	1.61999e-14
							cg08044294	2213959	2213960	0.621364	4.75379e-15	9.67823e-14
chr17	hsa-miR-212/132	2049908	2050380	CpG:_810	2049625	2059334	cg01160692	2056326	2056327	0.933079	1.60877e-16	5.04325e-15
							cg13389502	2058146	2058147	0.666723	2.00384e-17	8.90484e-16
							cg20664636	2056302	2056303	1.33486	3.17901e-16	9.03983e-15
							cg24173182	2057992	2057993	0.819274	6.35213e-18	3.55895e-16
							cg25520679	2055827	2055828	2.36809	9.54699e-19	8.57887e-17
chr11	hsa-miR-34c/34b	111512938	111513515	CpG:_79	111512443	111513167	cg01192900	111512943	111512944	2.2435	3.80543e-18	2.38296e-16
							cg13767940	111512878	111512879	2.34047	1.65981e-17	7.66395e-16
							cg18515591	111512563	111512564	1.73792	3.77297e-18	2.36935e-16
							cg21881253	111512851	111512852	3.48826	4.71562e-16	1.26916e-14
							cg22879515	111512790	111512791	3.78601	7.77098e-17	2.72029e-15
							cg23211240	111512899	111512900	1.37439	1.31607e-17	6.33435e-16
							cg24041078	111513164	111513165	3.2862	8.65312e-16	2.15689e-14
chr15	hsa-miR-3529/1179	88608107	88611924	CpG:_100	88604429	88605967	cg00955497	88605468	88605469	1.12624	1.0085e-13	1.50955e-12
							cg14971325	88604555	88604556	1.70674	2.95605e-06	1.27949e-05
chr22	hsa-miR-659/658	37844272	37847774	CpG:_125	37824582	37825612	cg01961447	37825088	37825089	3.19466	1.22915e-10	1.04904e-09
							cg07416664	37825478	37825479	0.9358	7.91242e-15	1.51751e-13
							cg07879739	37825180	37825181	2.85532	1.68574e-13	2.40334e-12
							cg25887069	37825002	37825003	2.81812	4.89883e-08	2.79319e-07

## Sheet: ESCA
Chromosome	miRNA Cluster	Cluster Start	Cluster End	CpG Island	Island Start	island End	Probe	Probe Start	Probe End	Log2FC	p value	adj pvalue
chr11	hsa-miR-34c/34b	111512938	111513515	CpG:_79	111512443	111513167	cg22879515	111512790	111512791	1.55049	0.000168095	0.00155646
chr20	hsa-miR-647/1914	63941465	63942726	CpG:_28	63931192	63931509	cg05116443	63931327	63931328	0.686658	0.000579677	0.00383443
							cg12713040	63931193	63931194	0.515952	0.000345546	0.00261335
							cg15457037	63931495	63931496	0.596113	4.03522e-05	0.000584108
chr22	hsa-miR-659/658	37844272	37847774	CpG:_125	37824582	37825612	cg07416664	37825478	37825479	0.727478	3.57541e-05	0.000539121
							cg07879739	37825180	37825181	2.79229	1.64597e-05	0.000334077
							cg25887069	37825002	37825003	3.05344	0.000147461	0.00142142

## Sheet: HNSC
Chromosome	miRNA Cluster	Cluster Start	Cluster End	CpG Island	Island Start	island End	Probe	Probe Start	Probe End	Log2FC	p value	adj pvalue
chr16	hsa-miR-3180-5/4516	2133119	2136129	CpG:_17	2127127	2127328	cg03494430	2127268	2127269	0.678665	3.57483e-24	1.25557e-22
chr16	hsa-miR-3179-3/3180-3	18402178	18411977	CpG:_312	18384422	18388684	cg09556148	18388355	18388356	-0.532573	2.61117e-19	3.47752e-18

## Sheet: KIRC
Chromosome	miRNA Cluster	Cluster Start	Cluster End	CpG Island	Island Start	island End	Probe	Probe Start	Probe End	Log2FC	p value	adj pvalue
chr1	hsa-miR-429/200b	1167104	1169087	CpG:_180	1162663	1165204	cg00207921	1163612	1163613	0.720777	3.87764e-48	9.48418e-47
							cg18792131	1163786	1163787	0.895952	3.33929e-55	1.79005e-53
							cg20544808	1163671	1163672	0.780506	4.20321e-55	2.22369e-53
							cg21778193	1162690	1162691	0.683506	9.89559e-39	1.17068e-37
chr22	hsa-miR-659/658	37844272	37847774	CpG:_125	37824582	37825612	cg07416664	37825478	37825479	1.12991	6.56597e-41	9.03163e-40

## Sheet: KIRP
Chromosome	miRNA Cluster	Cluster Start	Cluster End	CpG Island	Island Start	island End	Probe	Probe Start	Probe End	Log2FC	p value	adj pvalue
chr17	hsa-miR-1250/657	81125276	81133308	CpG:_251	81119523	81122877	cg03709925	81122351	81122352	0.581965	2.42702e-22	2.25021e-20
							cg17279079	81122018	81122019	0.64307	1.21992e-21	7.80694e-20
chr6	hsa-miR-125a/99b	51692612	51693339	CpG:_35	32150324	32150767	cg00254681	32150680	32150681	1.51274	1.43367e-09	7.7615e-09
								32150643	32150644	1.20969	3.74474e-11	2.58831e-10
								32150598	32150599	0.68937	9.15115e-12	6.95765e-11
chr17	hsa-miR-33b/6777	17813480	17813931	CpG:_129	17809597	17811069	cg24287175	17810357	17810358	0.764196	1.82215e-09	9.70756e-09
chr1	hsa-miR-429/200b	1167104	1169087	CpG:_25	1157831	1158096	cg14288281	1158077	1158078	-1.36844	5.02581e-09	2.50012e-08
chr22	hsa-miR-659/658	37844272	37847774	CpG:_125	37824582	37825612	cg07416664	37825478	37825479	1.21725	1.37388e-15	1.89764e-14

## Sheet: LIHC
Chromosome	miRNA Cluster	Cluster Start	Cluster End	CpG Island	Island Start	island End	Probe	Probe Start	Probe End	Log2FC	p value	adj pvalue
chr19	hsa-miR-203b/203a	104117405	104117503	CpG:_23	53768486	53768705	cg00729627	53768573	53768574	-0.606194	2.71035e-16	3.34539e-15
chr22	hsa-miR-659/658	37844272	37847774	CpG:_125	37824582	37825612	cg01961447	37825088	37825089	1.86493	1.25857e-14	1.09597e-13
chr9	hsa-miR-203b/203a	104117405	104117503	CpG:_23	134839040	134839356	cg05328939	134839179	134839180	-0.701349	3.62929e-14	2.89933e-13
chr16	hsa-miR-3179-3/3180-3	18402178	18411977	CpG:_312	18384422	18388684	cg05740024	18386666	18386667	-0.441748	1.50107e-18	3.29328e-17
chr9	hsa-miR-429/200b	1167104	1169087	CpG:_25	134842307	134842629	cg13649103	134842492	134842493	-0.805115	1.66209e-15	1.72448e-14
chr9	hsa-miR-203b/203a	104117405	104117503	CpG:_23	134839040	134839356	cg14340852	134839228	134839229	-0.548662	7.75288e-19	1.84446e-17
chr14	hsa-miR-203b/203a	104117405	104117503	CpG:_173	104116699	104118237	cg14361409	104117761	104117762	1.72873	8.76931e-12	4.70534e-11
chr9	hsa-miR-203b/203a	104117405	104117503	CpG:_23	134839040	134839356	cg14582636	134839334	134839335	-0.636699	3.99623e-18	7.77169e-17
chr14	hsa-miR-4537/4539	105857513	105859553	CpG:_20	105855645	105855897	cg15144068	105855646	105855647	-0.621989	5.74688e-14	4.42117e-13
chr19	hsa-miR-203b/203a	104117405	104117503	CpG:_23	53768486	53768705	cg20639942	53768704	53768705	-0.594613	3.22221e-18	6.43634e-17
chr14	hsa-miR-4537/4539	105857513	105859553	CpG:_20	105855645	105855897	cg23641237	105855765	105855766	-0.581793	5.30777e-14	4.10936e-13

## Sheet: LUSC
Chromosome	miRNA Cluster	Cluster Start	Cluster End	CpG Island	Island Start	island End	Probe	Probe Start	Probe End	Log2FC	p value	adj pvalue
chr19	hsa-miR-6789/1227	2234062	2235926	CpG:_169	2226194	2228343	cg00043005	2227430	2227431	-0.510854	7.08732e-20	1.05819e-18
chr17	hsa-miR-1250/657	81125276	81133308	CpG:_251	81119523	81122877	cg02460935	81120615	81120616	-0.504478	8.19181e-23	4.24541e-21
chr17	hsa-miR-1250/657	81125276	81133308	CpG:_251	81119523	81122877	cg02546490	81122729	81122730	-0.596355	3.89722e-19	4.77863e-18
chr17	hsa-miR-1250/657	81125276	81133308	CpG:_251	81119523	81122877	cg05292376	81121436	81121437	-0.606942	6.18605e-24	9.08599e-22
chr17	hsa-miR-1250/657	81125276	81133308	CpG:_251	81119523	81122877	cg06971227	81120113	81120114	-0.656535	1.97601e-21	5.01121e-20
chr22	hsa-miR-659/658	37844272	37847774	CpG:_125	37824582	37825612	cg07416664	37825478	37825479	0.798574	4.81761e-14	2.16637e-13
chr9	hsa-miR-429/200b	1167104	1169087	CpG:_25	134842307	134842629	cg13649103	134842492	134842493	-0.457023	1.5926e-18	1.68506e-17
chr11	hsa-miR-34c/34b	111512938	111513515	CpG:_79	111512443	111513167	cg13767940	111512878	111512879	1.94943	1.22662e-12	4.46719e-12
chr14	hsa-miR-4537/4539	105857513	105859553	CpG:_20	105855645	105855897	cg15144068	105855646	105855647	-0.562005	3.07306e-20	5.11132e-19
chr11	hsa-miR-34c/34b	111512938	111513515	CpG:_79	111512443	111513167	cg22879515	111512790	111512791	4.0634	1.77705e-16	1.22932e-15

[truncated: 3 more sheets: PAAD, PRAD, UCEC]
