# Supplementary material for: CmirC update 2024: a multi-omics database for clustered miRNAs
Source: Funct Integr Genomics. 2024 Aug 1;24(4):133. doi: 10.1007/s10142-024-01410-2 (PMC11291601; doi:10.1007/s10142-024-01410-2)
Supplement: Supplementary file 6 — Supplementary Material 6 [file 10142_2024_1410_MOESM6_ESM.xlsx]

## Sheet: Sheet1
CmirC update 2024: A multi-omics database for clustered miRNAs
Akshay Pramod Ware1,2, Kapaettu Satyamoorthy3, and Bobby Paul1*
1Department of Bioinformatics, Manipal School of Life Sciences, Manipal Academy of Higher Education, Manipal – 576104, Karnataka, India.
2Institute of Cardiovascular Regeneration, Johann Wolfgang Goethe University, Theodor-Stern-Kai 7, Frankfurt Am Main – 60590, Germany.
3SDM College of Medical Sciences and Hospital, Shri Dharmasthala Manjunatheshwara (SDM) University, Manjushree Nagar, Sattur, Dharwad, Karnataka, 580009, India.
*Correspondence to: bobby.paul@manipal.edu
Supplementary File 5

## Sheet: Cluster Targets
miR-200b/429 Targets			Tumor supressor genes							Oncogenes
miRNA	Target Genes		BLCA	BRCA	KIRC	LUSC	UCSC	Common TSGenes		BLCA	BRCA	KIRC	LUSC	UCEC
hsa-miR-200a-3p	DLX5		PDCD4	PDCD4	BAP1	YAP1	PCDH8	YAP1		DLX5	MYB	LHX1	DLX5	DLX5
hsa-miR-200a-3p	BAP1		SMAD2	SMAD2	SMAD2	PTPRD	PDCD4	THRB		EZH2	IGF2BP1	MYC	MYB
hsa-miR-200a-3p	G3BP2		YAP1	YAP1	YAP1	RASSF2	SMAD2	RASSF8		IGF2BP1	LHX1		IGF2BP1
hsa-miR-200a-3p	PCDH8		PTPRD	RASSF2	PTPRD	PTEN	YAP1	DLC1		MACC1	FOXG1		SOX2
hsa-miR-200a-3p	RAB30		RASSF2	PTEN	DLC1	DLC1	PTPRD	ABI2		EGFR	SOX2
hsa-miR-200a-3p	ZEB2		PTEN	DLC1	FOXC1	STAT3	RASSF2			SOX2
hsa-miR-200a-3p	CTNNB1		DLC1	FOXC1	STAT3	SLC5A8	PTEN
hsa-miR-200a-3p	ZEB1		STAT3	STAT3	CDK6	SOD2	DLC1
hsa-miR-200a-3p	GEMIN2		CDK6	CDK6	PRKAA2	KLF10	CDK6
hsa-miR-200a-3p	PDCD4		PRKAA2	EPHA2	SKIL	THRB	PRKAA2
hsa-miR-200a-3p	GATA6		SOD2	PRKAA2	THRB	FOXA2	ZNF292
hsa-miR-200a-3p	VCAM1		KLF10	ZNF292	DICER1	TNFRSF10B	KLF10
hsa-miR-200a-3p	PSMD2		THRB	SOD2	SUZ12	PTPN12	THRB
hsa-miR-200a-3p	WASF3		GJA1	KLF10	RASSF8	ERRFI1	GJA1
hsa-miR-200a-3p	TFRC		DICER1	THRB	PHLPP1	RASSF8	DICER1
hsa-miR-200a-3p	ZFPM2		RND3	GJA1	ABI2	NOTCH1	RND3
hsa-miR-200a-3p	TRAPPC2B		ERRFI1	DICER1	RHOA	CDKN1B	ERRFI1
hsa-miR-200a-3p	GDAP1		RASSF8	TNFRSF10B	BCL2L11	ABI2	RASSF8
hsa-miR-200a-3p	MAPK14		NOTCH1	RND3	HIF1A	TP53INP1	NOTCH1
hsa-miR-200a-3p	CCNE2		PHLPP1	ERRFI1		TCF7L2	CDKN1B
hsa-miR-200a-3p	KEAP1		ABI2	RASSF8		RHOA	LOX
hsa-miR-200a-3p	SRF		RHOA	NOTCH1		PKD1	PHLPP1
hsa-miR-200a-3p	SMAD2		PKD1	LOX			ABI2
hsa-miR-200a-3p	SMAD3
hsa-miR-200a-3p	YAP1
hsa-miR-200a-3p	KLHL20
hsa-miR-200a-3p	PTPRD
hsa-miR-200a-3p	ELMO2
hsa-miR-200a-3p	ERBIN
hsa-miR-200a-3p	WDR37
hsa-miR-200a-3p	VAC14
hsa-miR-200a-3p	SHC1
hsa-miR-200a-3p	TCF7L1
hsa-miR-200a-3p	RASSF2
hsa-miR-200a-3p	RIN2
hsa-miR-200a-3p	HOXB5
hsa-miR-200a-3p	SEPT7
hsa-miR-200a-3p	KLF11
hsa-miR-200a-3p	MYB
hsa-miR-200a-3p	TFAM
hsa-miR-200a-3p	UBASH3B
hsa-miR-200a-3p	TP53
hsa-miR-200a-3p	DNMT1
hsa-miR-200a-3p	EZH2
hsa-miR-200a-3p	PTEN
hsa-miR-200a-3p	HFE
hsa-miR-200a-3p	DLC1
hsa-miR-200a-3p	ATRX
hsa-miR-200a-3p	PPP1R15B
hsa-miR-200a-3p	RAB8B
hsa-miR-200a-3p	MED13
hsa-miR-200a-5p	BICRA
hsa-miR-200a-5p	FOXC1
hsa-miR-200a-3p	QKI
hsa-miR-200a-3p	ADNP2
hsa-miR-200a-3p	ARL5B
hsa-miR-200a-3p	TNKS2
hsa-miR-200a-3p	SPRYD4
hsa-miR-200a-3p	STAT3
hsa-miR-200a-3p	OGT
hsa-miR-200a-3p	PGK1
hsa-miR-200a-3p	ZBTB34
hsa-miR-200a-5p	UHMK1
hsa-miR-200a-3p	HNRNPAB
hsa-miR-200a-5p	SUB1
hsa-miR-200a-3p	IPO5
hsa-miR-200a-3p	AREG
hsa-miR-200a-3p	GRB2
hsa-miR-200a-3p	CDK6
hsa-miR-200a-3p	STXBP2
hsa-miR-200a-3p	SEPT8
hsa-miR-200a-3p	DPY19L1
hsa-miR-200a-5p	OLA1
hsa-miR-200a-3p	CHML
hsa-miR-200a-5p	GRPEL2
hsa-miR-200a-5p	ZNF99
hsa-miR-200a-5p	FCHO2
hsa-miR-200a-5p	METTL7A
hsa-miR-200a-5p	ATAD5
hsa-miR-200a-3p	NDST4
hsa-miR-200a-3p	TRAM1
hsa-miR-200a-3p	YRDC
hsa-miR-200a-3p	PSMD11
hsa-miR-200a-3p	MCL1
hsa-miR-200a-3p	CYP1B1
hsa-miR-200a-5p	CS
hsa-miR-200a-3p	BICD2
hsa-miR-200a-5p	RGL2
hsa-miR-200a-5p	XBP1P1
hsa-miR-200a-3p	PRELID2
hsa-miR-200a-3p	USP53
hsa-miR-200a-3p	HNRNPF
hsa-miR-200a-3p	GNA13
hsa-miR-200a-3p	FUT11
hsa-miR-200a-3p	EPHA2
hsa-miR-200a-5p	CLIP1
hsa-miR-200a-3p	BRD3
hsa-miR-200a-5p	C11orf74
hsa-miR-200a-3p	TMOD3
hsa-miR-200a-3p	MARCH6
hsa-miR-200a-3p	KIAA1147
hsa-miR-200a-5p	ZNF90
hsa-miR-200a-5p	ZNF117
hsa-miR-200a-5p	CYP4F11
hsa-miR-200a-3p	ZNF805
hsa-miR-200a-3p	ZMAT3
hsa-miR-200a-5p	CEBPG
hsa-miR-200a-5p	CDCA4
hsa-miR-200a-5p	ZNF138
hsa-miR-200a-3p	MALT1
hsa-miR-200a-5p	IL12RB2
hsa-miR-200a-3p	KIAA1549
hsa-miR-200a-3p	ELAVL2
hsa-miR-200a-3p	ATXN7L1
hsa-miR-200a-5p	ZNF639
hsa-miR-200a-3p	PIGW
hsa-miR-200a-3p	EPHA7
hsa-miR-200a-3p	C18orf25
hsa-miR-200a-5p	WWTR1
hsa-miR-200a-5p	OTX1
hsa-miR-200a-3p	SLC35D1
hsa-miR-200a-5p	PMEPA1
hsa-miR-200a-3p	PGAM4
hsa-miR-200a-3p	H2AFZ
hsa-miR-200a-3p	TRMT112
hsa-miR-200a-5p	THAP5
hsa-miR-200a-5p	ZNF675
hsa-miR-200a-5p	ZNF254
hsa-miR-200a-5p	ZNF431
hsa-miR-200a-3p	XPOT
hsa-miR-200a-3p	CDV3
hsa-miR-200a-3p	KIAA1549L
hsa-miR-200a-5p	PPA1
hsa-miR-200a-5p	IGF2BP1
hsa-miR-200a-3p	LHX1
hsa-miR-200a-5p	PLEKHG7
hsa-miR-200a-5p	YAE1D1
hsa-miR-200a-3p	YME1L1
hsa-miR-200a-3p	APOOL
hsa-miR-200a-3p	ZNF621
hsa-miR-200a-5p	SLC5A8
hsa-miR-200a-5p	APOL6
hsa-miR-200a-3p	ANGPTL7
hsa-miR-200a-5p	WNT16
hsa-miR-200a-5p	ZMAT4
hsa-miR-200a-3p	PRKAA2
hsa-miR-200a-5p	PLAG1
hsa-miR-200a-3p	MACC1
hsa-miR-200a-3p	CCDC18
hsa-miR-200a-3p	DNAJC28
hsa-miR-200a-3p	ZNF292
hsa-miR-200a-3p	RPL12
hsa-miR-200a-3p	A1BG
hsa-miR-200a-5p	CPS1
hsa-miR-200a-5p	SOD2
hsa-miR-200a-5p	SRXN1
hsa-miR-200a-3p	POLR3F
hsa-miR-200a-3p	COX6B1
hsa-miR-200a-3p	RBM28
hsa-miR-200a-5p	SKIL
hsa-miR-200a-3p	LPP
hsa-miR-200a-5p	KLF10
hsa-miR-200a-5p	HHIP
hsa-miR-200a-3p	CCDC71L
hsa-miR-200a-3p	TROVE2
hsa-miR-200a-3p	BICRAL
hsa-miR-200a-3p	ERO1A
hsa-miR-200a-3p	HSPA4
hsa-miR-200a-5p	COBLL1
hsa-miR-200a-3p	SCD5
hsa-miR-200a-5p	GRHL1
hsa-miR-200a-3p	CLDND1
hsa-miR-200a-5p	CKS2
hsa-miR-200a-3p	PEX11A
hsa-miR-200a-5p	SOX17
hsa-miR-200a-3p	CELF1
hsa-miR-200a-3p	MYH10
hsa-miR-200a-3p	SPAG9
hsa-miR-200a-3p	TGFB2
hsa-miR-200a-3p	foxg1a
hsa-miR-200a-3p	DEK
hsa-miR-200a-3p	THRB
hsa-miR-200a-3p	MFF
hsa-miR-200a-5p	PTEN
hsa-miR-200a-5p	CTNNB1
hsa-miR-200a-3p	GJA1
hsa-miR-200a-3p	HGF
hsa-miR-200a-3p	DICER1
hsa-miR-200a-3p	FOXA2
hsa-miR-200a-3p	HMGB1
hsa-miR-200a-3p	TP73-AS1
hsa-miR-200a-3p	MALAT1
hsa-miR-200a-3p	MNX1
hsa-miR-200a-3p	EGFR
hsa-miR-200a-3p	C16orf58
hsa-miR-200a-3p	IRF2BPL
hsa-miR-200a-5p	ALDOA
hsa-miR-200a-3p	KLF12
hsa-miR-200a-3p	MDM4
hsa-miR-200a-3p	PHB2
hsa-miR-200a-3p	RAP2C
hsa-miR-200a-3p	TNFRSF10B
hsa-miR-200a-5p	MDM4
hsa-miR-200a-5p	STAR
hsa-miR-200a-3p	UQCRFS1
hsa-miR-200b-3p	PTPN12
hsa-miR-200b-3p	ZEB2
hsa-miR-200b-3p	BAP1
hsa-miR-200b-3p	ZEB1
hsa-miR-200b-3p	RERE
hsa-miR-200b-3p	EP300
hsa-miR-200b-3p	ETS1
hsa-miR-200b-3p	GATA4
hsa-miR-200b-3p	FN1
hsa-miR-200b-3p	WASF3
hsa-miR-200b-3p	ZFPM2
hsa-miR-200b-3p	MATR3
hsa-miR-200b-3p	RNF2
hsa-miR-200b-3p	BMI1
hsa-miR-200b-3p	E2F3
hsa-miR-200b-3p	VEGFA
hsa-miR-200b-3p	FLT1
hsa-miR-200b-3p	KDR
hsa-miR-200b-3p	RND3
hsa-miR-200b-3p	CCNE2
hsa-miR-200b-3p	BCL2
hsa-miR-200b-3p	XIAP
hsa-miR-200b-3p	SMAD2
hsa-miR-200b-3p	CREB1
hsa-miR-200b-3p	KLHL20
hsa-miR-200b-3p	ELMO2
hsa-miR-200b-3p	PTPRD
hsa-miR-200b-3p	ERRFI1
hsa-miR-200b-3p	ERBIN
hsa-miR-200b-3p	WDR37
hsa-miR-200b-3p	TCF7L1
hsa-miR-200b-3p	VAC14
hsa-miR-200b-3p	HOXB5
hsa-miR-200b-3p	RIN2
hsa-miR-200b-3p	RASSF2
hsa-miR-200b-3p	KLF11
hsa-miR-200b-3p	SEPT7
hsa-miR-200b-3p	SHC1
hsa-miR-200b-3p	SUPV3L1
hsa-miR-200b-3p	MYB
hsa-miR-200b-3p	QRSL1
hsa-miR-200b-3p	SUZ12
hsa-miR-200b-3p	WNT1
hsa-miR-200b-3p	DNMT3A
hsa-miR-200b-3p	DNMT3B
hsa-miR-200b-3p	SP1
hsa-miR-200b-3p	MSN
hsa-miR-200b-3p	DNMT1
hsa-miR-200b-3p	EZH2
hsa-miR-200b-3p	HFE
hsa-miR-200b-3p	DLC1
hsa-miR-200b-3p	HNRNPA3
hsa-miR-200b-3p	FERMT2
hsa-miR-200b-3p	RAB21
hsa-miR-200b-3p	RAB3B
hsa-miR-200b-3p	RAB18
hsa-miR-200b-3p	RAB23
hsa-miR-200b-3p	OXR1
hsa-miR-200b-3p	RASSF8
hsa-miR-200b-3p	PMAIP1
hsa-miR-200b-5p	BICRA
hsa-miR-200b-5p	FOXC1
hsa-miR-200b-3p	UHRF1BP1
hsa-miR-200b-3p	ZFHX4
hsa-miR-200b-3p	ACSL4
hsa-miR-200b-3p	SHCBP1
hsa-miR-200b-3p	CAB39
hsa-miR-200b-3p	NRBP1
hsa-miR-200b-3p	ATP5G3
hsa-miR-200b-3p	ZMAT3
hsa-miR-200b-3p	N4BP2
hsa-miR-200b-3p	QKI
hsa-miR-200b-3p	ANKRD33B
hsa-miR-200b-3p	DNAJB6
hsa-miR-200b-3p	DDIT4
hsa-miR-200b-5p	UHMK1
hsa-miR-200b-3p	KLHL42
hsa-miR-200b-3p	FOXG1
hsa-miR-200b-3p	PARD6B
hsa-miR-200b-3p	DNAJB9
hsa-miR-200b-3p	SHOC2
hsa-miR-200b-3p	NUFIP2
hsa-miR-200b-5p	SUB1
hsa-miR-200b-3p	NOTCH1
hsa-miR-200b-3p	BTC
hsa-miR-200b-3p	CDKN1B
hsa-miR-200b-3p	LOX
hsa-miR-200b-3p	PHLPP1
hsa-miR-200b-3p	SEC23A
hsa-miR-200b-3p	ROCK2
hsa-miR-200b-3p	PIN1
hsa-miR-200b-3p	DDX53
hsa-miR-200b-5p	OLA1
hsa-miR-200b-5p	GRPEL2
hsa-miR-200b-5p	ZNF99
hsa-miR-200b-5p	FCHO2
hsa-miR-200b-3p	PHF14
hsa-miR-200b-5p	METTL7A
hsa-miR-200b-5p	ATAD5
hsa-miR-200b-3p	CDC14B
hsa-miR-200b-3p	ZNF621
hsa-miR-200b-3p	CACNG8
hsa-miR-200b-3p	FKBP5
hsa-miR-200b-3p	M6PR
hsa-miR-200b-3p	KIF13A
hsa-miR-200b-3p	DENND5B
hsa-miR-200b-5p	CS
hsa-miR-200b-3p	MALT1
hsa-miR-200b-5p	RGL2
hsa-miR-200b-3p	CYP1A1
hsa-miR-200b-5p	XBP1P1
hsa-miR-200b-3p	SERPINH1
hsa-miR-200b-3p	TJAP1
hsa-miR-200b-3p	TPD52L1
hsa-miR-200b-3p	CASP2
hsa-miR-200b-3p	AVPR1A
hsa-miR-200b-3p	GPX8
hsa-miR-200b-3p	ABI2
hsa-miR-200b-3p	CLEC2D
hsa-miR-200b-3p	UBE2D1
hsa-miR-200b-3p	TP53INP1
hsa-miR-200b-3p	ELOC
hsa-miR-200b-3p	TBK1
hsa-miR-200b-3p	PRRG4
hsa-miR-200b-3p	PLCG1
hsa-miR-200b-3p	NCOA2
hsa-miR-200b-3p	KRAS
hsa-miR-200b-3p	JUN
hsa-miR-200b-5p	CLIP1
hsa-miR-200b-3p	CELF1
hsa-miR-200b-3p	CCNT2
hsa-miR-200b-3p	BAG4
hsa-miR-200b-5p	C11orf74
hsa-miR-200b-3p	TUBB2A
hsa-miR-200b-3p	TCF7L2
hsa-miR-200b-3p	GPATCH8
hsa-miR-200b-3p	LMNB1
hsa-miR-200b-5p	ZNF90
hsa-miR-200b-5p	ZNF117
hsa-miR-200b-5p	CYP4F11
hsa-miR-200b-5p	CEBPG
hsa-miR-200b-5p	CDCA4
hsa-miR-200b-5p	ZNF138
hsa-miR-200b-3p	C6orf47
hsa-miR-200b-3p	TRIM56
hsa-miR-200b-3p	MAPK7
hsa-miR-200b-3p	CLPB
hsa-miR-200b-3p	TXNDC16
hsa-miR-200b-5p	IL12RB2
hsa-miR-200b-3p	UNC119B
hsa-miR-200b-3p	TMEM119
hsa-miR-200b-3p	TAF1D
hsa-miR-200b-3p	PAK2
hsa-miR-200b-3p	NLGN4X
hsa-miR-200b-3p	ERMP1
hsa-miR-200b-3p	PDPK1
hsa-miR-200b-5p	ZNF639
hsa-miR-200b-3p	CAMSAP2
hsa-miR-200b-5p	WWTR1
hsa-miR-200b-5p	OTX1
hsa-miR-200b-5p	PMEPA1
hsa-miR-200b-3p	GATA6
hsa-miR-200b-3p	FRS2
hsa-miR-200b-3p	CRLF3
hsa-miR-200b-3p	CDCA4
hsa-miR-200b-5p	THAP5
hsa-miR-200b-5p	ZNF675
hsa-miR-200b-5p	ZNF254
hsa-miR-200b-5p	ZNF431
hsa-miR-200b-3p	YEATS4
hsa-miR-200b-3p	MLLT10
hsa-miR-200b-3p	BBX
hsa-miR-200b-3p	ARPC3
hsa-miR-200b-3p	PSD3
hsa-miR-200b-3p	ABT1
hsa-miR-200b-5p	PPA1
hsa-miR-200b-5p	IGF2BP1
hsa-miR-200b-3p	PPM1H
hsa-miR-200b-5p	PLEKHG7
hsa-miR-200b-5p	YAE1D1
hsa-miR-200b-3p	INO80D
hsa-miR-200b-3p	IGF2
hsa-miR-200b-5p	SLC5A8
hsa-miR-200b-5p	APOL6
hsa-miR-200b-5p	WNT16
hsa-miR-200b-5p	ZMAT4
hsa-miR-200b-5p	PLAG1
hsa-miR-200b-3p	FAM216B
hsa-miR-200b-3p	PTPN4
hsa-miR-200b-3p	TMEM70
hsa-miR-200b-3p	STX16
hsa-miR-200b-5p	CPS1
hsa-miR-200b-5p	SOD2
hsa-miR-200b-5p	SRXN1
hsa-miR-200b-5p	SKIL
hsa-miR-200b-3p	SEC24A
hsa-miR-200b-3p	MTDH
hsa-miR-200b-5p	KLF10
hsa-miR-200b-5p	HHIP
hsa-miR-200b-3p	IRS1
hsa-miR-200b-5p	COBLL1
hsa-miR-200b-5p	GRHL1
hsa-miR-200b-3p	NGRN
hsa-miR-200b-3p	PABPC1
hsa-miR-200b-5p	CKS2
hsa-miR-200b-5p	SOX17
hsa-miR-200b-3p	RHOA
hsa-miR-200b-5p	PROM1
hsa-miR-200b-3p	ADAM12
hsa-miR-200b-3p	ETV5
hsa-miR-200b-3p	ATG12
hsa-miR-200b-3p	CD274
hsa-miR-200b-3p	IKBKB
hsa-miR-200b-5p	ATG12
hsa-miR-200b-3p	LDHA
hsa-miR-200b-3p	CRKL
hsa-miR-200b-5p	RHOA
hsa-miR-200b-3p	MALAT1
hsa-miR-200b-3p	FSCN1
hsa-miR-200b-3p	ARHGDIA
hsa-miR-200b-3p	DCBLD2
hsa-miR-200b-3p	GOT1
hsa-miR-200b-3p	MKNK2
hsa-miR-200b-3p	PKD1
hsa-miR-200b-3p	PPP1R18
hsa-miR-200b-3p	RTL8C
hsa-miR-200b-3p	SESN1
hsa-miR-200b-3p	SHOX2
hsa-miR-200b-3p	TUBB
hsa-miR-200b-3p	WNT16
hsa-miR-200b-5p	ALDOA
hsa-miR-200b-3p	ATP6V1E1
hsa-miR-200b-3p	BCL2L11
hsa-miR-200b-3p	MAMLD1
hsa-miR-200b-3p	MBD5
hsa-miR-200b-3p	OSTM1
hsa-miR-200b-3p	RAP2C
hsa-miR-200b-3p	SECISBP2L
hsa-miR-200b-5p	MDM4
hsa-miR-200b-5p	STAR
hsa-miR-200b-3p	C21orf91
hsa-miR-429	ZEB2
hsa-miR-429	ZEB1
hsa-miR-429	RERE
hsa-miR-429	EP300
hsa-miR-429	WASF3
hsa-miR-429	ZFPM2
hsa-miR-429	BCL2
hsa-miR-429	XIAP
hsa-miR-429	OSTF1
hsa-miR-429	SOX2
hsa-miR-429	KLHL20
hsa-miR-429	ERRFI1
hsa-miR-429	PTPRD
hsa-miR-429	ELMO2
hsa-miR-429	ERBIN
hsa-miR-429	BAP1
hsa-miR-429	WDR37
hsa-miR-429	VAC14
hsa-miR-429	TCF7L1
hsa-miR-429	HOXB5
hsa-miR-429	RASSF2
hsa-miR-429	RIN2
hsa-miR-429	KLF11
hsa-miR-429	SEPT7
hsa-miR-429	SHC1
hsa-miR-429	MYC
hsa-miR-429	MYB
hsa-miR-429	DNMT1
hsa-miR-429	EZH2
hsa-miR-429	RBBP4
hsa-miR-429	RASSF8
hsa-miR-429	PMAIP1
hsa-miR-429	UHRF1BP1
hsa-miR-429	ZFHX4
hsa-miR-429	ACSL4
hsa-miR-429	SHCBP1
hsa-miR-429	CAB39
hsa-miR-429	NRBP1
hsa-miR-429	ATP5G3
hsa-miR-429	ZMAT3
hsa-miR-429	N4BP2
hsa-miR-429	QKI
hsa-miR-429	ANKRD33B
hsa-miR-429	DNAJB6
hsa-miR-429	DDIT4
hsa-miR-429	KLHL42
hsa-miR-429	PARD6B
hsa-miR-429	DNAJB9
hsa-miR-429	SHOC2
hsa-miR-429	NUFIP2
hsa-miR-429	ONECUT2
hsa-miR-429	PTEN
hsa-miR-429	TIMP2
hsa-miR-429	PHF14
hsa-miR-429	CDC14B
hsa-miR-429	ZNF621
hsa-miR-429	CACNG8
hsa-miR-429	FKBP5
hsa-miR-429	M6PR
hsa-miR-429	KIF13A
hsa-miR-429	DENND5B
hsa-miR-429	SEC23A
hsa-miR-429	MALT1
hsa-miR-429	CYP1A1
hsa-miR-429	SERPINH1
hsa-miR-429	TJAP1
hsa-miR-429	TPD52L1
hsa-miR-429	CASP2
hsa-miR-429	AVPR1A
hsa-miR-429	GPX8
hsa-miR-429	ABI2
hsa-miR-429	CLEC2D
hsa-miR-429	UBE2D1
hsa-miR-429	TP53INP1
hsa-miR-429	ELOC
hsa-miR-429	TBK1
hsa-miR-429	PRRG4
hsa-miR-429	PLCG1
hsa-miR-429	NCOA2
hsa-miR-429	KRAS
hsa-miR-429	JUN
hsa-miR-429	CELF1
hsa-miR-429	CCNT2
hsa-miR-429	BAG4
hsa-miR-429	TUBB2A
hsa-miR-429	TCF7L2
hsa-miR-429	GPATCH8
hsa-miR-429	LMNB1
hsa-miR-429	C6orf47
hsa-miR-429	TRIM56
hsa-miR-429	MAPK7
hsa-miR-429	CLPB
hsa-miR-429	TXNDC16
hsa-miR-429	UNC119B
hsa-miR-429	TMEM119
hsa-miR-429	TAF1D
hsa-miR-429	PAK2
hsa-miR-429	NLGN4X
hsa-miR-429	ERMP1
hsa-miR-429	PDPK1
hsa-miR-429	CAMSAP2
hsa-miR-429	GATA6
hsa-miR-429	FRS2
hsa-miR-429	CRLF3
hsa-miR-429	CDCA4
hsa-miR-429	YEATS4
hsa-miR-429	MLLT10
hsa-miR-429	CDKN1B
hsa-miR-429	BBX
hsa-miR-429	ARPC3
hsa-miR-429	PSD3
hsa-miR-429	ABT1
hsa-miR-429	PPM1H
hsa-miR-429	INO80D
hsa-miR-429	IGF2
hsa-miR-429	FAM216B
hsa-miR-429	PTPN4
hsa-miR-429	TMEM70
hsa-miR-429	STX16
hsa-miR-429	SEC24A
hsa-miR-429	MTDH
hsa-miR-429	IRS1
hsa-miR-429	NGRN
hsa-miR-429	PABPC1
hsa-miR-429	HIF1A
hsa-miR-429	FSCN1
hsa-miR-429	IL4
hsa-miR-429	CRKL
hsa-miR-429	DLC1
hsa-miR-429	SP1
hsa-miR-429	MALAT1
hsa-miR-429	VEGFA
hsa-miR-429	ARHGDIA
hsa-miR-429	DCBLD2
hsa-miR-429	GOT1
hsa-miR-429	MKNK2
hsa-miR-429	PKD1
hsa-miR-429	PPP1R18
hsa-miR-429	RTL8C
hsa-miR-429	SESN1
hsa-miR-429	SHOX2
hsa-miR-429	TUBB
hsa-miR-429	WNT16
hsa-miR-429	ATP6V1E1
hsa-miR-429	BCL2L11
hsa-miR-429	MAMLD1
hsa-miR-429	MBD5
hsa-miR-429	OSTM1
hsa-miR-429	RAP2C
hsa-miR-429	SECISBP2L
hsa-miR-429	C21orf91
