# Supplementary material for: CmirC update 2024: a multi-omics database for clustered miRNAs
Source: Funct Integr Genomics. 2024 Aug 1;24(4):133. doi: 10.1007/s10142-024-01410-2 (PMC11291601; doi:10.1007/s10142-024-01410-2)
Supplement: Supplementary file 7 — Supplementary Material 7 [file 10142_2024_1410_MOESM7_ESM.xlsx]

## Sheet: Sheet1
CmirC update 2024: A multi-omics database for clustered miRNAs
Akshay Pramod Ware1,2, Kapaettu Satyamoorthy3, and Bobby Paul1*
1Department of Bioinformatics, Manipal School of Life Sciences, Manipal Academy of Higher Education, Manipal – 576104, Karnataka, India.
2Institute of Cardiovascular Regeneration, Johann Wolfgang Goethe University, Theodor-Stern-Kai 7, Frankfurt Am Main – 60590, Germany.
3SDM College of Medical Sciences and Hospital, Shri Dharmasthala Manjunatheshwara (SDM) University, Manjushree Nagar, Sattur, Dharwad, Karnataka, 580009, India.
*Correspondence to: bobby.paul@manipal.edu
Supplementary File 6

## Sheet: Partial-CNV
Cancer	Chr	CNV-Start	CNV-End	Status	CNV-Size	Cluster-Start	Cluster-End	Cluster-Name	Cluster-Size	Overlap
TCGA-BRCA	Chr19	55223852	55233139	Amp	9288	55230885	55245250	mir-6803/6804	14365	2254
	Chr19	55242819	55298804	Amp	55986	55230885	55245250	mir-6803/6804	14365	2431
TCGA-KIPAN	Chr1	40757217	40759682	Del	2466	40754355	40757372	mir-30c-1/30e	3017	155
TCGA-LGG	Chr6	33245978	33288620	Amp	42643	33287227	33290325	mir-6834/6873	3098	1393
	Chr12	57506558	57515209	Amp	8652	57512688	57519259	mir-616/6758	6571	2521
TCGA-LIHC	Chr12	57465648	57515209	Amp	49562	57512688	57519259	mir-616/6758	6571	2521
TCGA-LUAD	Chr14	101026508	101026963	Del	456	101022066	101043062	mir-1185-1/379	20996	455
	Chr14	100962669	101026397	Del	63729	101022066	101043062	mir-1185-1/379	20996	4331
	Chr14	101027252	101555070	Del	527819	101022066	101043062	mir-1185-1/379	20996	15810
TCGA-LUSC	Chr18	21785578	21828009	Amp	42432	21825698	21829088	mir-1-2/133a-1	3390	2311
TCGA-SKCM	Chr16	14308858	14617537	Amp	308680	14303967	14309371	mir-365a/193b	5404	513
	Chr16	13185417	14307588	Amp	1122172	14303967	14309371	mir-365a/193b	5404	3621
TCGA-STAD	Chr6	52146249	52158335	Amp	12087	52144349	52149041	mir-133b/206	4692	2792
	Chr6	52114931	52145026	Amp	30096	52144349	52149041	mir-133b/206	4692	677
	Chr11	122149091	123335885	Del	1186795	122146522	122152308	mir-100/let-7a-2	5786	3217
TCGA-UCEC	Chr17	48036456	48073865	Amp	37406	48032882	48037247	mir-152/10226	4365	791
