# Supplementary material for: CmirC update 2024: a multi-omics database for clustered miRNAs
Source: Funct Integr Genomics. 2024 Aug 1;24(4):133. doi: 10.1007/s10142-024-01410-2 (PMC11291601; doi:10.1007/s10142-024-01410-2)
Supplement: Supplementary file 8 — Supplementary Material 8 [file 10142_2024_1410_MOESM8_ESM.xlsx]

## Sheet: Sheet1
CmirC update 2024: A multi-omics database for clustered miRNAs
Akshay Pramod Ware1,2, Kapaettu Satyamoorthy3, and Bobby Paul1*
1Department of Bioinformatics, Manipal School of Life Sciences, Manipal Academy of Higher Education, Manipal – 576104, Karnataka, India.
2Institute of Cardiovascular Regeneration, Johann Wolfgang Goethe University, Theodor-Stern-Kai 7, Frankfurt Am Main – 60590, Germany.
3SDM College of Medical Sciences and Hospital, Shri Dharmasthala Manjunatheshwara (SDM) University, Manjushree Nagar, Sattur, Dharwad, Karnataka, 580009, India.
*Correspondence to: bobby.paul@manipal.edu
Supplementary File 7

## Sheet: Sheet2
miRNA Cluster	Cluster coordinates (hg38)	No of the CpG islands	CpGI corrdinates
miR-10394/4754	chr19:58386770-58393446	1	chr19:58386354-58387511
miR-10396a/3648-2	chr21:8986999-8987665	1	chr21:8986609-8987978
miR-10396b/10401	chr21:8206563-8436374	16	chr21:8219029-8221343, 8223622-8224171, 8236315-8236632,8238342-8238818, 8243365-8243664, 8246540-8246795, 8379775-8380559, 8385195-8385450, 8406621-8407170, 8418718-8419035, 8426389-8426688, 8429564-8429819, 8421366-8421842, 8431968-8441142, 8248944-8258105, 8387800-8396922
miR-1250/657	chr17:81125276-81133308	1	chr17:81128948-81129170
miR-1306/3618	chr22:20085746-20086142	1	chr22:20085840-20086408
miR-136/493	chr14:100869060-100884783	2	chr14:100882048-100882361, 100883035-100883523
miR-137/2682	chr1:98045242-98046171	1	chr1:98045410-98046154
miR-152/10226	chr17:48032882-48037247	1	chr17:48037207-48037771
miR-203b/203a	chr14:104117405-104117503	1	chr14:104116699-104118237
miR-212/132	chr17:2049908-2050380	1	chr17:2049625-2059334
miR-219b/219a-2	chr9:128392618-128392708	1	chr9:128392067-128393644
miR-24-1/23b	chr9:95085208-95086088	1	chr9:95085858-95086243
miR-2861/3960	chr9:127785833-127786007	1	chr9:127784985-127786838
miR-3176/5587	chr16:535316-543366	4	chr16:537651-538172, 540093-540368, 541327-541590, 543299-543500
miR-3179-3/3180-3	chr16:18402178-18411977	1	chr16:18401247-18402541
miR-3180-1/3179-1	chr16:14901508-14911313	1	chr16:14910949-14912243
miR-3180-2/3179-2	chr16:16300159-16309966	1	chr16:16309604-16310899
miR-3180-5/4516	chr16:2133119-2136129	1	chr16:2135138-2136405
miR-3187/4745	chr19:804940-813653	4	chr19:804218-806663, 807131-807445, 808004-808834, 811904-815288
miR-34c/34b	chr11:111512938-111513515	1	chr11:111512443-111513167
miR-647/1914	chr20:63941465-63942726	1	chr20:63941983-63942434
miR-6514/6748	chr11:62789815-62792771	1	chr11:62791627-62792083
miR-659/658	chr22:37844272-37847774	1	chr22:37843785-37844402
miR-6724-2/10401	chr21:8206563-8249596	17	chr21:8219029-8221343, 8223622-8224171, 8236315-8236632, 8238342-8238818, 8243365-8243664, 8246540-8246795, 8248944-8258105, 8219029-8221343, 8223622-8224171, 8236315-8236632, 8238342-8238818, 8243365-8243664, 8246540-8246795, 8379775-8380559, 8385195-8385450, 8248944-8258105, 8387800-8396922
miR-6749/192	chr11:64891137-64902455	1	chr11:64894990-64895408
miR-6770-1/6511a-1	chr16:14925937-14930879	1	chr16:14925797-14926789
miR-6770-2/6511a-2	chr16:16324588-16329364	1	chr16:16324448-16325440
miR-6789/1227	chr19:2234062-2235926	1	chr19:2235682-2237103
miR-6790/6885	chr19:6389638-6392983	1	chr19:6392865-6393871
miR-6834/6873	chr6:33287227-33290325	1	chr6:33288762-33289196
miR-6849/939	chr8:144394149-144400345	3	chr8:144394307-144394537, 144396370-144396676, 144397764-144398110
miR-941-5/941-1	chr20:63919449-63919939	1	chr20:63919360-63920170
