# Supplementary material for: CmirC update 2024: a multi-omics database for clustered miRNAs
Source: Funct Integr Genomics. 2024 Aug 1;24(4):133. doi: 10.1007/s10142-024-01410-2 (PMC11291601; doi:10.1007/s10142-024-01410-2)
Supplement: Supplementary file 9 — Supplementary Material 9 [file 10142_2024_1410_MOESM9_ESM.xlsx]

## Sheet: Sheet1
CmirC update 2024: A multi-omics database for clustered miRNAs
Akshay Pramod Ware1,2, Kapaettu Satyamoorthy3, and Bobby Paul1*
1Department of Bioinformatics, Manipal School of Life Sciences, Manipal Academy of Higher Education, Manipal – 576104, Karnataka, India.
2Institute of Cardiovascular Regeneration, Johann Wolfgang Goethe University, Theodor-Stern-Kai 7, Frankfurt Am Main – 60590, Germany.
3SDM College of Medical Sciences and Hospital, Shri Dharmasthala Manjunatheshwara (SDM) University, Manjushree Nagar, Sattur, Dharwad, Karnataka, 580009, India.
*Correspondence to: bobby.paul@manipal.edu
Supplementary File 8

## Sheet: BLCA
Chromosome	Start	End	Cluster	Chromosome	Start	End	CpG Site	Log2(Fold Change)	p-value	adj-pvalue
chr11	122146522	122152308	hsa-miR-100/let-7a-2	chr11	122146673	122146674	cg03649143	-0.684274	1.81239e-12	2.11275e-10
chr11	122146522	122152308	hsa-miR-100/let-7a-2	chr11	122152291	122152292	cg19116912	-0.554445	2.84696e-06	1.30153e-05
chr14	101022066	101043062	hsa-miR-1185-1/379	chr14	101023849	101023850	cg00175487	-1.10377	2.28147e-12	2.31351e-10
chr14	101022066	101043062	hsa-miR-1185-1/379	chr14	101026594	101026595	cg00752143	-0.744967	2.09185e-10	3.96436e-09
chr14	101022066	101043062	hsa-miR-1185-1/379	chr14	101033096	101033097	cg00856952	-0.6495	1.20141e-10	2.61585e-09
chr14	101022066	101043062	hsa-miR-1185-1/379	chr14	101023159	101023160	cg00989505	-0.679487	3.34054e-12	2.68866e-10
chr14	101022066	101043062	hsa-miR-1185-1/379	chr14	101028710	101028711	cg01131100	-0.705667	1.86278e-09	2.24883e-08
chr14	101022066	101043062	hsa-miR-1185-1/379	chr14	101023312	101023313	cg01132653	-0.824179	2.608e-12	2.45073e-10
chr14	101022066	101043062	hsa-miR-1185-1/379	chr14	101039186	101039187	cg01200264	-0.946593	1.68792e-11	6.68533e-10
chr14	101022066	101043062	hsa-miR-1185-1/379	chr14	101026069	101026070	cg01587049	-0.780133	1.63846e-10	3.29861e-09
chr14	101022066	101043062	hsa-miR-1185-1/379	chr14	101038793	101038794	cg02047319	-0.60231	4.36732e-10	7.00534e-09
chr14	101022066	101043062	hsa-miR-1185-1/379	chr14	101041233	101041234	cg02174748	-0.772158	9.10894e-12	4.5538e-10
chr14	101022066	101043062	hsa-miR-1185-1/379	chr14	101022151	101022152	cg02691745	-0.684991	8.04302e-11	1.94943e-09
chr14	101022066	101043062	hsa-miR-1185-1/379	chr14	101040195	101040196	cg04585937	-0.59529	1.63833e-08	1.40109e-07
chr14	101022066	101043062	hsa-miR-1185-1/379	chr14	101040482	101040483	cg05348084	-0.783703	2.29508e-10	4.25797e-09
chr14	101022066	101043062	hsa-miR-1185-1/379	chr14	101031869	101031870	cg05865548	-1.04366	9.14973e-13	1.79366e-10
chr14	101022066	101043062	hsa-miR-1185-1/379	chr14	101027024	101027025	cg06961429	-1.00671	3.1554e-12	2.63449e-10
chr14	101022066	101043062	hsa-miR-1185-1/379	chr14	101042452	101042453	cg10079327	-0.902924	1.92856e-10	3.73478e-09
chr14	101022066	101043062	hsa-miR-1185-1/379	chr14	101023808	101023809	cg10082525	-0.734606	3.27766e-12	2.67337e-10
chr14	101022066	101043062	hsa-miR-1185-1/379	chr14	101041253	101041254	cg10137253	-0.893083	1.57383e-12	2.0169e-10
chr14	101022066	101043062	hsa-miR-1185-1/379	chr14	101032815	101032816	cg10300864	-0.907421	3.39585e-10	5.77357e-09
chr14	101022066	101043062	hsa-miR-1185-1/379	chr14	101025657	101025658	cg11035122	-0.824612	2.57499e-12	2.43362e-10
chr14	101022066	101043062	hsa-miR-1185-1/379	chr14	101026915	101026916	cg11780042	-0.847338	1.28154e-10	2.73824e-09
chr14	101022066	101043062	hsa-miR-1185-1/379	chr14	101025160	101025161	cg12820006	-0.740818	3.01838e-12	2.59103e-10
chr14	101022066	101043062	hsa-miR-1185-1/379	chr14	101029692	101029693	cg12823329	-0.665878	1.39353e-10	2.91951e-09
chr14	101022066	101043062	hsa-miR-1185-1/379	chr14	101022086	101022087	cg13278105	-0.719337	4.19367e-12	3.00681e-10
chr14	101022066	101043062	hsa-miR-1185-1/379	chr14	101025854	101025855	cg13637893	-0.651614	5.46244e-11	1.47931e-09
chr14	101022066	101043062	hsa-miR-1185-1/379	chr14	101039750	101039751	cg13995230	-0.98045	1.4694e-09	1.85313e-08
chr14	101022066	101043062	hsa-miR-1185-1/379	chr14	101040042	101040043	cg14144314	-0.598795	2.47954e-11	8.60241e-10
chr14	101022066	101043062	hsa-miR-1185-1/379	chr14	101029490	101029491	cg14148088	-0.730416	5.32924e-10	8.20494e-09
chr14	101022066	101043062	hsa-miR-1185-1/379	chr14	101033788	101033789	cg14910227	-1.14059	6.1899e-13	1.72254e-10
chr14	101022066	101043062	hsa-miR-1185-1/379	chr14	101025560	101025561	cg16575409	-0.551856	2.85387e-09	3.20036e-08
chr14	101022066	101043062	hsa-miR-1185-1/379	chr14	101023191	101023192	cg18384960	-0.865805	1.47585e-12	1.98582e-10
chr14	101022066	101043062	hsa-miR-1185-1/379	chr14	101023648	101023649	cg19603100	-0.798041	7.4651e-12	4.06391e-10
chr14	101022066	101043062	hsa-miR-1185-1/379	chr14	101039909	101039910	cg19757573	-1.52764	6.87178e-13	1.72781e-10
chr14	101022066	101043062	hsa-miR-1185-1/379	chr14	101023078	101023079	cg20067612	-0.785314	5.56479e-12	3.47461e-10
chr14	101022066	101043062	hsa-miR-1185-1/379	chr14	101032006	101032007	cg21146428	-0.816417	1.10393e-11	5.11812e-10
chr14	101022066	101043062	hsa-miR-1185-1/379	chr14	101033715	101033716	cg21809913	-0.801789	1.34469e-11	5.79049e-10
chr14	101022066	101043062	hsa-miR-1185-1/379	chr14	101023218	101023219	cg21876806	-0.535904	4.06353e-12	2.95847e-10
chr14	101022066	101043062	hsa-miR-1185-1/379	chr14	101040242	101040243	cg21882238	-0.498467	1.04875e-10	2.37188e-09
chr14	101022066	101043062	hsa-miR-1185-1/379	chr14	101023683	101023684	cg23492249	-0.473057	5.63502e-12	3.49529e-10
chr14	101022066	101043062	hsa-miR-1185-1/379	chr14	101025927	101025928	cg23935255	-0.548898	4.35294e-09	4.54909e-08
chr14	101022066	101043062	hsa-miR-1185-1/379	chr14	101030005	101030006	cg24698352	-0.493766	2.15554e-11	7.83019e-10
chr14	101022066	101043062	hsa-miR-1185-1/379	chr14	101023916	101023917	cg24768094	-0.643763	3.65321e-11	1.11787e-09
chr14	101022066	101043062	hsa-miR-1185-1/379	chr14	101024339	101024340	cg25562958	-1.18795	2.41138e-13	1.72254e-10
chr14	101022066	101043062	hsa-miR-1185-1/379	chr14	101025332	101025333	cg26015115	-0.760792	1.83902e-11	7.04281e-10
chr14	101022066	101043062	hsa-miR-1185-1/379	chr14	101033283	101033284	cg26931307	-0.709262	1.25182e-10	2.69142e-09
chr14	101022066	101043062	hsa-miR-1185-1/379	chr14	101033743	101033744	cg27074221	-1.09118	2.40082e-12	2.35498e-10
chr17	81125276	81133308	hsa-miR-1250/657	chr17	81125681	81125682	cg02317955	-0.817227	4.32789e-12	3.05271e-10
chr17	81125276	81133308	hsa-miR-1250/657	chr17	81130982	81130983	cg06310712	-0.670193	2.21669e-10	4.14679e-09
chr17	81125276	81133308	hsa-miR-1250/657	chr17	81125985	81125986	cg06807993	-0.92219	2.69804e-10	4.82455e-09
chr17	81125276	81133308	hsa-miR-1250/657	chr17	81133283	81133284	cg13466409	-0.501503	6.08213e-11	1.59936e-09
chr17	81125276	81133308	hsa-miR-1250/657	chr17	81125446	81125447	cg18609037	-0.649034	2.01556e-11	7.49227e-10
chr17	81125276	81133308	hsa-miR-1250/657	chr17	81125977	81125978	cg18637486	-0.746798	9.10768e-11	2.13493e-09
chr17	81125276	81133308	hsa-miR-1250/657	chr17	81126142	81126143	cg23295826	-0.641391	3.49465e-10	5.89892e-09
chr6	52144349	52149041	hsa-miR-133b/206	chr6	52147592	52147593	cg14487577	-0.503462	8.23284e-08	5.66589e-07
chr6	52144349	52149041	hsa-miR-133b/206	chr6	52144356	52144357	cg25284213	-1.01139	3.04173e-13	1.72254e-10
chr14	100869060	100884783	hsa-miR-136/493	chr14	100880707	100880708	cg02022380	-0.606149	2.42407e-08	1.96015e-07
chr14	100869060	100884783	hsa-miR-136/493	chr14	100882783	100882784	cg05899507	-0.641723	8.04425e-12	4.24274e-10
chr14	100869060	100884783	hsa-miR-136/493	chr14	100881021	100881022	cg07087646	-0.686522	2.65093e-11	8.9914e-10
chr14	100869060	100884783	hsa-miR-136/493	chr14	100882947	100882948	cg10726559	-0.493376	6.17448e-08	4.4133e-07
chr14	100869060	100884783	hsa-miR-136/493	chr14	100874994	100874995	cg11887124	-0.649472	2.71362e-10	4.84697e-09
chr14	100869060	100884783	hsa-miR-136/493	chr14	100880953	100880954	cg15516314	-0.615555	1.13841e-11	5.21512e-10
chr14	100869060	100884783	hsa-miR-136/493	chr14	100882976	100882977	cg18862502	-0.601093	3.29693e-11	1.03953e-09
chr14	100869060	100884783	hsa-miR-136/493	chr14	100884402	100884403	cg18947995	-0.490755	5.93874e-11	1.57356e-09
chr14	100869060	100884783	hsa-miR-136/493	chr14	100875101	100875102	cg19945937	-0.615946	1.87304e-11	7.12979e-10
chr14	100869060	100884783	hsa-miR-136/493	chr14	100880947	100880948	cg23546343	-0.673238	1.4213e-11	5.99122e-10
chr14	100869060	100884783	hsa-miR-136/493	chr14	100884394	100884395	cg26254637	-0.600093	5.9618e-12	3.6087e-10
chr1	98045242	98046171	hsa-miR-137/2682	chr1	98045702	98045703	cg04763554	1.69108	3.73414e-05	0.000130057
chr1	98045242	98046171	hsa-miR-137/2682	chr1	98045967	98045968	cg19050990	2.0116	1.15536e-07	7.62588e-07
chr12	6963699	6964191	hsa-miR-141/200c	chr12	6964101	6964102	cg02624246	-0.890855	9.54847e-11	2.20962e-09
chr12	6963699	6964191	hsa-miR-141/200c	chr12	6964084	6964085	cg12161331	-0.685536	2.50988e-11	8.66362e-10
chr12	6963699	6964191	hsa-miR-141/200c	chr12	6964079	6964080	cg18185189	-0.747519	1.75111e-11	6.83309e-10
chr12	6963699	6964191	hsa-miR-141/200c	chr12	6964077	6964078	cg19794481	-0.967352	1.13281e-10	2.50859e-09
chr12	6963699	6964191	hsa-miR-141/200c	chr12	6964016	6964017	cg23067082	-1.06342	7.35817e-11	1.82876e-09
chr17	48032882	48037247	hsa-miR-152/10226	chr17	48033460	48033461	cg17740401	-0.660611	1.63694e-11	6.5602e-10
chr1	198858873	198859153	hsa-miR-181a-1/181b-1	chr1	198859028	198859029	cg25349643	-0.69345	4.26888e-10	6.88335e-09
chr3	49020148	49020709	hsa-miR-191/425	chr3	49020228	49020229	cg07109801	-0.928574	2.9803e-12	2.57904e-10
chr1	172138798	172144644	hsa-miR-199a-2/214	chr1	172138847	172138848	cg20972167	-0.649019	6.05048e-06	2.55634e-05
chr7	93482760	93484019	hsa-miR-489/653	chr7	93484002	93484003	cg03816029	-0.488521	5.36434e-09	5.42835e-08
chr19	53666679	53706336	hsa-miR-526a-1/512-1	chr19	53683955	53683956	cg03799024	-0.849689	4.71709e-09	4.86319e-08
chr19	53666679	53706336	hsa-miR-526a-1/512-1	chr19	53688356	53688357	cg09318158	-0.563364	4.899e-07	2.72592e-06
chr19	53666679	53706336	hsa-miR-526a-1/512-1	chr19	53682187	53682188	cg09522962	-0.666861	6.92884e-07	3.70618e-06
chr19	53666679	53706336	hsa-miR-526a-1/512-1	chr19	53686299	53686300	cg09796029	-0.564997	5.86818e-10	8.84765e-09
chr19	53666679	53706336	hsa-miR-526a-1/512-1	chr19	53678049	53678050	cg09926260	-0.733776	3.88017e-11	1.16401e-09
chr19	53666679	53706336	hsa-miR-526a-1/512-1	chr19	53694051	53694052	cg15003468	-0.614144	7.7205e-08	5.35986e-07
chr19	53666679	53706336	hsa-miR-526a-1/512-1	chr19	53701195	53701196	cg17857791	-0.627983	3.80334e-09	4.06423e-08
chr19	53666679	53706336	hsa-miR-526a-1/512-1	chr19	53701149	53701150	cg19606290	-0.814566	1.81223e-09	2.19805e-08
chr19	53666679	53706336	hsa-miR-526a-1/512-1	chr19	53671352	53671353	cg24128045	-0.530947	1.47621e-06	7.2615e-06

## Sheet: BRCA
Chromosome	Start	End	Cluster	Chromosome	Start	End	CpG Site	Log2(Fold Change)	p-value	adj-pvalue
chr11	122146522	122152308	hsa-miR-100/let-7a-2	chr11	122147809	122147810	cg06811361	-0.456211	4.72127e-37	2.3331e-35
chr11	122146522	122152308	hsa-miR-100/let-7a-2	chr11	122151131	122151132	cg16949103	-0.649604	4.66373e-37	2.3064e-35
chr11	122146522	122152308	hsa-miR-100/let-7a-2	chr11	122152291	122152292	cg19116912	-0.684274	4.89294e-42	7.41199e-40
chr7	100093560	100094074	hsa-miR-106b/25	chr7	100093762	100093763	cg22420044	0.891348	1.72199e-35	6.49583e-34
chr14	101022066	101043062	hsa-miR-1185-1/379	chr14	101023849	101023850	cg00175487	-0.616249	1.60668e-33	4.44372e-32
chr14	101022066	101043062	hsa-miR-1185-1/379	chr14	101032815	101032816	cg10300864	-0.674579	3.22645e-43	7.0315e-41
chr14	101022066	101043062	hsa-miR-1185-1/379	chr14	101024339	101024340	cg25562958	-0.740668	6.15945e-42	9.02999e-40
chr6	52144349	52149041	hsa-miR-133b/206	chr6	52144356	52144357	cg25284213	-0.74753	2.20488e-42	3.68856e-40
chr17	7017615	7018022	hsa-miR-497/195	chr17	7017976	7017977	cg06679494	0.758607	4.88053e-29	7.694e-28
chr17	7017615	7018022	hsa-miR-497/195	chr17	7017656	7017657	cg11235787	0.793145	2.4734e-44	8.05436e-42
chr19	53666679	53706336	hsa-miR-526a-1/512-1	chr19	53697993	53697994	cg00054741	-0.491145	1.78332e-21	1.35012e-20
chr19	53666679	53706336	hsa-miR-526a-1/512-1	chr19	53683955	53683956	cg03799024	-0.652931	3.49223e-25	3.69053e-24
chr19	53666679	53706336	hsa-miR-526a-1/512-1	chr19	53705263	53705264	cg09404289	-0.491149	1.18322e-29	2.00054e-28
chr19	53666679	53706336	hsa-miR-526a-1/512-1	chr19	53701149	53701150	cg19606290	-0.725859	1.15424e-35	4.47301e-34
chr19	53666679	53706336	hsa-miR-526a-1/512-1	chr19	53671352	53671353	cg24128045	-0.468262	4.59918e-25	4.80495e-24

## Sheet: COAD
Chromosome	Start	End	Cluster	Chromosome	Start	End	CpG Site	Log2(Fold Change)	p-value	adj-pvalue
chr11	122146522	122152308	hsa-miR-100/let-7a-2	chr11	122146673	122146674	cg03649143	-0.541558	1.29416e-17	6.24741e-16
chr11	122146522	122152308	hsa-miR-100/let-7a-2	chr11	122147954	122147955	cg18590130	-0.565231	1.10651e-15	2.67382e-14
chr14	101022066	101043062	hsa-miR-1185-1/379	chr14	101023849	101023850	cg00175487	-0.798076	2.2526e-18	1.6099e-16
chr14	101022066	101043062	hsa-miR-1185-1/379	chr14	101040195	101040196	cg04585937	-0.561375	2.69537e-12	3.04503e-11
chr14	101022066	101043062	hsa-miR-1185-1/379	chr14	101031869	101031870	cg05865548	-0.703405	5.88342e-18	3.35943e-16
chr14	101022066	101043062	hsa-miR-1185-1/379	chr14	101027024	101027025	cg06961429	-0.870865	1.53164e-17	7.17083e-16
chr14	101022066	101043062	hsa-miR-1185-1/379	chr14	101025657	101025658	cg11035122	-0.588595	4.36408e-18	2.6567e-16
chr14	101022066	101043062	hsa-miR-1185-1/379	chr14	101026915	101026916	cg11780042	-0.725171	5.72423e-15	1.14102e-13
chr14	101022066	101043062	hsa-miR-1185-1/379	chr14	101033788	101033789	cg14910227	-0.872132	2.58551e-18	1.78034e-16
chr14	101022066	101043062	hsa-miR-1185-1/379	chr14	101039909	101039910	cg19757573	-1.07699	1.80562e-15	4.1024e-14
chr14	101022066	101043062	hsa-miR-1185-1/379	chr14	101024339	101024340	cg25562958	-0.630881	1.06974e-13	1.5923e-12
chr6	52144349	52149041	hsa-miR-133b/206	chr6	52144356	52144357	cg25284213	-0.914374	5.20259e-20	1.46322e-17
chr1	98045242	98046171	hsa-miR-137/2682	chr1	98045475	98045476	cg00091285	3.04144	2.06528e-19	3.18359e-17
chr1	98045242	98046171	hsa-miR-137/2682	chr1	98045670	98045671	cg04282138	2.86435	1.09681e-19	2.17162e-17
chr1	98045242	98046171	hsa-miR-137/2682	chr1	98046073	98046074	cg04293733	1.3694	3.53609e-17	1.41297e-15
chr1	98045242	98046171	hsa-miR-137/2682	chr1	98045702	98045703	cg04763554	1.83751	4.79669e-20	1.40593e-17
chr1	98045242	98046171	hsa-miR-137/2682	chr1	98045654	98045655	cg09022943	2.26254	4.11327e-20	1.30935e-17
chr1	98045242	98046171	hsa-miR-137/2682	chr1	98045967	98045968	cg19050990	1.50376	3.19147e-20	1.20477e-17
chr1	198858873	198859153	hsa-miR-181a-1/181b-1	chr1	198859028	198859029	cg25349643	-0.606654	1.50855e-10	1.2696e-09
chr11	111512938	111513515	hsa-miR-34c/34b	chr11	111512943	111512944	cg01192900	2.2435	3.80543e-18	2.38296e-16
chr11	111512938	111513515	hsa-miR-34c/34b	chr11	111513164	111513165	cg24041078	3.2862	8.65312e-16	2.15689e-14
chr8	12719132	12727299	hsa-miR-3926-2/5692a-2	chr8	12726683	12726684	cg24921221	-1.17289	4.86584e-19	5.43856e-17
chr7	93482760	93484019	hsa-miR-489/653	chr7	93484002	93484003	cg03816029	-0.504679	3.28868e-13	4.42143e-12
chr19	53666679	53706336	hsa-miR-526a-1/512-1	chr19	53683955	53683956	cg03799024	-0.896201	2.087e-16	6.28472e-15
chr19	53666679	53706336	hsa-miR-526a-1/512-1	chr19	53688356	53688357	cg09318158	-0.775542	8.5345e-20	1.87543e-17
chr19	53666679	53706336	hsa-miR-526a-1/512-1	chr19	53678049	53678050	cg09926260	-0.830089	1.14811e-20	9.04452e-18
chr19	53666679	53706336	hsa-miR-526a-1/512-1	chr19	53694051	53694052	cg15003468	-0.67951	1.19951e-17	5.89989e-16
chr19	53666679	53706336	hsa-miR-526a-1/512-1	chr19	53701195	53701196	cg17857791	-0.762154	6.79099e-19	6.78902e-17
chr19	53666679	53706336	hsa-miR-526a-1/512-1	chr19	53701149	53701150	cg19606290	-0.865701	2.35185e-18	1.66129e-16
chr19	53666679	53706336	hsa-miR-526a-1/512-1	chr19	53688452	53688453	cg26377653	-1.11772	4.46208e-17	1.71081e-15

## Sheet: ESCA
Chromosome	Start	End	Cluster	Chromosome	Start	End	CpG Site	Log2(Fold Change)	p-value	adj-pvalue
chr7	93482760	93484019	hsa-miR-489/653	chr7	93484002	93484003	cg03816029	-0.503247	1.95416e-06	0.000109747
chr1	98045242	98046171	hsa-miR-137/2682	chr1	98045702	98045703	cg04763554	1.22196	0.000875478	0.00522063
chr11	68032864	68033981	hsa-miR-4691/7113	chr11	68033757	68033758	cg05753046	0.514379	1.49004e-08	2.33916e-05
chr17	81125276	81133308	hsa-miR-1250/657	chr17	81126414	81126415	cg06332842	-0.472213	8.64236e-05	0.000979818
chr17	81125276	81133308	hsa-miR-1250/657	chr17	81125985	81125986	cg06807993	-0.791288	2.22952e-05	0.000401198
chr9	95085208	95086088	hsa-miR-24-1/23b	chr9	95086024	95086025	cg09951047	0.756062	1.52875e-05	0.000319624
chr19	53666679	53706336	hsa-miR-526a-1/512-1	chr19	53701195	53701196	cg17857791	-0.653978	2.43115e-06	0.000120749
chr17	81125276	81133308	hsa-miR-1250/657	chr17	81125977	81125978	cg18637486	-0.583731	4.73342e-06	0.0001674
chr1	98045242	98046171	hsa-miR-137/2682	chr1	98045967	98045968	cg19050990	1.2681	0.000294088	0.00232511
chr19	53666679	53706336	hsa-miR-526a-1/512-1	chr19	53701149	53701150	cg19606290	-0.782296	8.59722e-07	7.83161e-05
chr6	52144349	52149041	hsa-miR-133b/206	chr6	52144356	52144357	cg25284213	-0.906417	1.62341e-06	0.000102237

## Sheet: HNSC
Chromosome	Start	End	Cluster	Chromosome	Start	End	CpG Site	Log2(Fold Change)	p-value	adj-pvalue
chr14	101022066	101043062	hsa-miR-1185-1/379	chr14	101023849	101023850	cg00175487	-0.798249	2.86742e-28	6.07849e-26
chr14	101022066	101043062	hsa-miR-1185-1/379	chr14	101033096	101033097	cg00856952	-0.508217	4.04534e-22	8.84243e-21
chr14	101022066	101043062	hsa-miR-1185-1/379	chr14	101023159	101023160	cg00989505	-0.529675	6.56935e-28	1.06048e-25
chr14	101022066	101043062	hsa-miR-1185-1/379	chr14	101023312	101023313	cg01132653	-0.659669	2.90885e-29	1.62692e-26
chr14	101022066	101043062	hsa-miR-1185-1/379	chr14	101039186	101039187	cg01200264	-0.651851	1.04578e-24	4.26877e-23
chr14	101022066	101043062	hsa-miR-1185-1/379	chr14	101026069	101026070	cg01587049	-0.488167	9.57592e-24	3.00786e-22
chr14	101022066	101043062	hsa-miR-1185-1/379	chr14	101022151	101022152	cg02691745	-0.566489	1.76195e-26	1.33865e-24
chr14	101022066	101043062	hsa-miR-1185-1/379	chr14	101031869	101031870	cg05865548	-0.703187	3.68262e-27	3.86301e-25
chr14	101022066	101043062	hsa-miR-1185-1/379	chr14	101027024	101027025	cg06961429	-0.862526	2.75188e-29	1.58387e-26
chr14	101022066	101043062	hsa-miR-1185-1/379	chr14	101032815	101032816	cg10300864	-0.712928	2.52142e-27	2.89074e-25
chr14	101022066	101043062	hsa-miR-1185-1/379	chr14	101026915	101026916	cg11780042	-0.681773	1.796e-26	1.35957e-24
chr14	101022066	101043062	hsa-miR-1185-1/379	chr14	101033788	101033789	cg14910227	-0.722657	2.28913e-25	1.14772e-23
chr14	101022066	101043062	hsa-miR-1185-1/379	chr14	101023191	101023192	cg18384960	-0.633462	1.74127e-27	2.18688e-25
chr14	101022066	101043062	hsa-miR-1185-1/379	chr14	101039909	101039910	cg19757573	-1.01761	1.55576e-26	1.21104e-24
chr14	101022066	101043062	hsa-miR-1185-1/379	chr14	101023078	101023079	cg20067612	-0.57402	2.79247e-27	3.12989e-25
chr14	101022066	101043062	hsa-miR-1185-1/379	chr14	101024339	101024340	cg25562958	-0.813315	6.12091e-29	2.34182e-26
chr14	101022066	101043062	hsa-miR-1185-1/379	chr14	101033743	101033744	cg27074221	-0.752174	3.48478e-25	1.63849e-23
chr6	52144349	52149041	hsa-miR-133b/206	chr6	52147592	52147593	cg14487577	-0.6275	5.76238e-26	3.5748e-24
chr6	52144349	52149041	hsa-miR-133b/206	chr6	52144356	52144357	cg25284213	-0.809658	1.91594e-30	9.05771e-27
chr14	100869060	100884783	hsa-miR-136/493	chr14	100880707	100880708	cg02022380	-0.474545	1.18479e-20	1.95346e-19
chr14	100869060	100884783	hsa-miR-136/493	chr14	100880947	100880948	cg23546343	-0.582612	1.25517e-27	1.70217e-25
chr1	98045242	98046171	hsa-miR-137/2682	chr1	98046073	98046074	cg04293733	2.04667	4.70946e-13	2.81224e-12
chr1	98045242	98046171	hsa-miR-137/2682	chr1	98045702	98045703	cg04763554	1.73754	3.87495e-12	2.09114e-11
chr9	95085208	95086088	hsa-miR-24-1/23b	chr9	95086024	95086025	cg09951047	0.650641	2.2053e-17	2.22653e-16
chr17	58331232	58336022	hsa-miR-4736/142	chr17	58331443	58331444	cg00176888	-0.75567	7.12091e-18	7.67431e-17
chr7	93482760	93484019	hsa-miR-489/653	chr7	93484002	93484003	cg03816029	-0.516614	1.0065e-25	5.70871e-24
chr19	53666679	53706336	hsa-miR-526a-1/512-1	chr19	53683955	53683956	cg03799024	-0.76562	4.11841e-24	1.42244e-22
chr19	53666679	53706336	hsa-miR-526a-1/512-1	chr19	53688356	53688357	cg09318158	-0.770424	6.10199e-28	1.00637e-25
chr19	53666679	53706336	hsa-miR-526a-1/512-1	chr19	53678049	53678050	cg09926260	-0.733781	6.61868e-30	1.00289e-26
chr19	53666679	53706336	hsa-miR-526a-1/512-1	chr19	53689759	53689760	cg10753636	-0.55046	2.01103e-22	4.67833e-21
chr19	53666679	53706336	hsa-miR-526a-1/512-1	chr19	53679757	53679758	cg11179120	-0.555726	8.01023e-23	2.03225e-21
chr19	53666679	53706336	hsa-miR-526a-1/512-1	chr19	53701195	53701196	cg17857791	-0.629495	4.78348e-27	4.72603e-25
chr19	53666679	53706336	hsa-miR-526a-1/512-1	chr19	53701149	53701150	cg19606290	-0.796371	8.55976e-29	2.82701e-26
chr19	53666679	53706336	hsa-miR-526a-1/512-1	chr19	53688452	53688453	cg26377653	-1.14464	1.03698e-27	1.47079e-25

## Sheet: KIRC
Chromosome	Start	End	Cluster	Chromosome	Start	End	CpG Site	Log2(Fold Change)	p-value	adj-pvalue
chr14	101022066	101043062	hsa-miR-1185-1/379	chr14	101031869	101031870	cg05865548	-0.512726	1.58112e-59	1.71817e-57
chr14	101022066	101043062	hsa-miR-1185-1/379	chr14	101039750	101039751	cg13995230	-0.687102	3.49e-53	1.44956e-51
chr19	13836287	13836659	hsa-miR-23a/24-2	chr19	13836655	13836656	cg06606386	-1.36715	2.1884e-53	9.31799e-52
chr19	53666679	53706336	hsa-miR-526a-1/512-1	chr19	53683955	53683956	cg03799024	-0.528588	6.21879e-43	9.91732e-42

## Sheet: KIRP
Chromosome	Start	End	Cluster	Chromosome	Start	End	CpG Site	Log2(Fold Change)	p-value	adj-pvalue
chr7	100093560	100094074	hsa-miR-106b/25	chr7	100093691	100093692	cg24854681	0.620642	1.35414e-21	8.47181e-20
chr17	81125276	81133308	hsa-miR-1250/657	chr17	81125985	81125986	cg06807993	-0.8669	4.56953e-15	5.80273e-14
chr17	81125276	81133308	hsa-miR-1250/657	chr17	81125977	81125978	cg18637486	-0.665112	7.36162e-16	1.06368e-14
chr1	40754355	40757372	hsa-miR-30c-1/30e	chr1	40757086	40757087	cg11135080	0.615149	2.0286e-20	8.07656e-19
chr1	40754355	40757372	hsa-miR-30c-1/30e	chr1	40757229	40757230	cg24700993	0.767033	3.92395e-23	6.17374e-21
chr8	134800520	134804945	hsa-miR-30d/30b	chr8	134804874	134804875	cg01954305	0.51151	1.70521e-23	3.64444e-21

## Sheet: LIHC
Chromosome	Start	End	Cluster	Chromosome	Start	End	CpG Site	Log2(Fold Change)	p-value	adj-pvalue
chr11	122146522	122152308	hsa-miR-100/let-7a-2	chr11	122151131	122151132	cg16949103	-0.577468	9.30073e-22	6.1311e-20
chr14	101022066	101043062	hsa-miR-1185-1/379	chr14	101023849	101023850	cg00175487	-0.990852	1.0251e-18	2.35718e-17
chr14	101022066	101043062	hsa-miR-1185-1/379	chr14	101033096	101033097	cg00856952	-0.781162	1.64488e-14	1.40057e-13
chr14	101022066	101043062	hsa-miR-1185-1/379	chr14	101023159	101023160	cg00989505	-0.657093	3.99446e-13	2.65558e-12
chr14	101022066	101043062	hsa-miR-1185-1/379	chr14	101023312	101023313	cg01132653	-0.7402	8.73632e-15	7.83728e-14
chr14	101022066	101043062	hsa-miR-1185-1/379	chr14	101042912	101042913	cg01205338	-0.527924	7.59093e-13	4.82006e-12
chr14	101022066	101043062	hsa-miR-1185-1/379	chr14	101031323	101031324	cg01232479	-0.567269	6.90182e-11	3.23831e-10
chr14	101022066	101043062	hsa-miR-1185-1/379	chr14	101026069	101026070	cg01587049	-0.715012	3.02897e-12	1.74664e-11
chr14	101022066	101043062	hsa-miR-1185-1/379	chr14	101022151	101022152	cg02691745	-0.67663	8.04537e-13	5.08874e-12
chr14	101022066	101043062	hsa-miR-1185-1/379	chr14	101023785	101023786	cg03556771	-0.575039	3.36237e-11	1.65358e-10
chr14	101022066	101043062	hsa-miR-1185-1/379	chr14	101040195	101040196	cg04585937	-0.568976	2.3727e-07	6.88031e-07
chr14	101022066	101043062	hsa-miR-1185-1/379	chr14	101033556	101033557	cg04826652	-0.638713	1.48314e-15	1.55537e-14
chr14	101022066	101043062	hsa-miR-1185-1/379	chr14	101042579	101042580	cg05216211	-0.500144	6.08328e-19	1.49342e-17
chr14	101022066	101043062	hsa-miR-1185-1/379	chr14	101025406	101025407	cg06549228	-0.56752	2.07228e-10	9.071e-10
chr14	101022066	101043062	hsa-miR-1185-1/379	chr14	101029267	101029268	cg07429629	-0.640859	5.61946e-09	2.01827e-08
chr14	101022066	101043062	hsa-miR-1185-1/379	chr14	101023726	101023727	cg10036091	-0.627851	5.07808e-11	2.43133e-10
chr14	101022066	101043062	hsa-miR-1185-1/379	chr14	101023808	101023809	cg10082525	-0.717854	2.05505e-15	2.09018e-14
chr14	101022066	101043062	hsa-miR-1185-1/379	chr14	101041253	101041254	cg10137253	-0.788326	1.24416e-21	7.7757e-20
chr14	101022066	101043062	hsa-miR-1185-1/379	chr14	101029421	101029422	cg10400174	-0.616812	3.81799e-13	2.54684e-12
chr14	101022066	101043062	hsa-miR-1185-1/379	chr14	101023703	101023704	cg10969550	-0.476137	3.91277e-10	1.64775e-09
chr14	101022066	101043062	hsa-miR-1185-1/379	chr14	101026915	101026916	cg11780042	-0.759189	1.17373e-10	5.32779e-10
chr14	101022066	101043062	hsa-miR-1185-1/379	chr14	101026691	101026692	cg12044862	-0.592903	1.11147e-08	3.83767e-08
chr14	101022066	101043062	hsa-miR-1185-1/379	chr14	101031887	101031888	cg12242174	-0.480638	1.92792e-09	7.37802e-09
chr14	101022066	101043062	hsa-miR-1185-1/379	chr14	101025160	101025161	cg12820006	-0.677561	9.85664e-14	7.29303e-13
chr14	101022066	101043062	hsa-miR-1185-1/379	chr14	101029692	101029693	cg12823329	-0.715348	4.75213e-20	1.65576e-18
chr14	101022066	101043062	hsa-miR-1185-1/379	chr14	101042807	101042808	cg13098800	-0.507798	7.50086e-16	8.38636e-15
chr14	101022066	101043062	hsa-miR-1185-1/379	chr14	101022086	101022087	cg13278105	-0.590913	1.30653e-11	6.82817e-11
chr14	101022066	101043062	hsa-miR-1185-1/379	chr14	101025854	101025855	cg13637893	-0.650223	7.09992e-13	4.5299e-12
chr14	101022066	101043062	hsa-miR-1185-1/379	chr14	101039589	101039590	cg14037354	-0.477705	5.84023e-08	1.83302e-07
chr14	101022066	101043062	hsa-miR-1185-1/379	chr14	101029490	101029491	cg14148088	-0.707507	2.20353e-13	1.53275e-12
chr14	101022066	101043062	hsa-miR-1185-1/379	chr14	101039603	101039604	cg14371292	-0.481537	3.32854e-09	1.23268e-08
chr14	101022066	101043062	hsa-miR-1185-1/379	chr14	101041705	101041706	cg14427563	-0.506701	1.22622e-11	6.43684e-11
chr14	101022066	101043062	hsa-miR-1185-1/379	chr14	101025993	101025994	cg16208643	-0.580433	2.90796e-11	1.44361e-10
chr14	101022066	101043062	hsa-miR-1185-1/379	chr14	101025560	101025561	cg16575409	-0.62099	9.79494e-12	5.21695e-11
chr14	101022066	101043062	hsa-miR-1185-1/379	chr14	101023191	101023192	cg18384960	-0.657492	1.15084e-11	6.06505e-11
chr14	101022066	101043062	hsa-miR-1185-1/379	chr14	101031423	101031424	cg18875631	-0.558334	1.31394e-14	1.14013e-13
chr14	101022066	101043062	hsa-miR-1185-1/379	chr14	101023648	101023649	cg19603100	-0.738091	2.82866e-15	2.79614e-14
chr14	101022066	101043062	hsa-miR-1185-1/379	chr14	101039909	101039910	cg19757573	-1.05595	9.65639e-13	6.02293e-12
chr14	101022066	101043062	hsa-miR-1185-1/379	chr14	101023078	101023079	cg20067612	-0.63988	1.05729e-11	5.60483e-11
chr14	101022066	101043062	hsa-miR-1185-1/379	chr14	101032006	101032007	cg21146428	-0.776676	9.5442e-18	1.68226e-16
chr14	101022066	101043062	hsa-miR-1185-1/379	chr14	101025502	101025503	cg21501241	-0.521854	4.77236e-12	2.6658e-11
chr14	101022066	101043062	hsa-miR-1185-1/379	chr14	101033715	101033716	cg21809913	-0.702578	1.80081e-14	1.52179e-13
chr14	101022066	101043062	hsa-miR-1185-1/379	chr14	101023218	101023219	cg21876806	-0.622742	2.19977e-11	1.11226e-10
chr14	101022066	101043062	hsa-miR-1185-1/379	chr14	101025040	101025041	cg23310549	-0.666417	7.18842e-14	5.43765e-13
chr14	101022066	101043062	hsa-miR-1185-1/379	chr14	101023683	101023684	cg23492249	-0.576761	1.28514e-17	2.18704e-16
chr14	101022066	101043062	hsa-miR-1185-1/379	chr14	101025927	101025928	cg23935255	-0.651018	1.46854e-13	1.05279e-12
chr14	101022066	101043062	hsa-miR-1185-1/379	chr14	101030005	101030006	cg24698352	-0.666203	6.86379e-18	1.25705e-16
chr14	101022066	101043062	hsa-miR-1185-1/379	chr14	101023916	101023917	cg24768094	-0.678171	8.90134e-14	6.63505e-13
chr14	101022066	101043062	hsa-miR-1185-1/379	chr14	101023660	101023661	cg25069907	-0.610021	2.6577e-14	2.17758e-13
chr14	101022066	101043062	hsa-miR-1185-1/379	chr14	101024339	101024340	cg25562958	-0.876634	1.55529e-19	4.60512e-18
chr14	101022066	101043062	hsa-miR-1185-1/379	chr14	101025332	101025333	cg26015115	-0.737837	8.04887e-15	7.27512e-14
chr14	101022066	101043062	hsa-miR-1185-1/379	chr14	101033283	101033284	cg26931307	-0.739996	7.49097e-13	4.76087e-12
chr14	101022066	101043062	hsa-miR-1185-1/379	chr14	101033743	101033744	cg27074221	-0.921491	1.49809e-15	1.56938e-14
chr17	81125276	81133308	hsa-miR-1250/657	chr17	81125985	81125986	cg06807993	-0.655835	9.4988e-17	1.30332e-15
chr17	81125276	81133308	hsa-miR-1250/657	chr17	81125977	81125978	cg18637486	-0.450511	1.87095e-15	1.9197e-14
chr6	52144349	52149041	hsa-miR-133b/206	chr6	52144356	52144357	cg25284213	-0.783863	3.13758e-19	8.42444e-18
chr14	100869060	100884783	hsa-miR-136/493	chr14	100880707	100880708	cg02022380	-0.641675	5.2919e-12	2.93637e-11
chr14	100869060	100884783	hsa-miR-136/493	chr14	100884535	100884536	cg02344891	-0.485128	1.49656e-06	3.91142e-06
chr14	100869060	100884783	hsa-miR-136/493	chr14	100883757	100883758	cg05371620	-0.501424	6.68152e-06	1.6074e-05
chr14	100869060	100884783	hsa-miR-136/493	chr14	100882783	100882784	cg05899507	-0.561783	2.27472e-09	8.61833e-09
chr14	100869060	100884783	hsa-miR-136/493	chr14	100883295	100883296	cg06792448	-0.699747	2.0339e-17	3.28622e-16
chr14	100869060	100884783	hsa-miR-136/493	chr14	100881848	100881849	cg08175935	-0.61221	8.95771e-21	4.00061e-19
chr14	100869060	100884783	hsa-miR-136/493	chr14	100881821	100881822	cg08244382	-0.488675	1.34874e-08	4.60534e-08
chr14	100869060	100884783	hsa-miR-136/493	chr14	100882947	100882948	cg10726559	-0.617369	1.13288e-12	6.989e-12
chr14	100869060	100884783	hsa-miR-136/493	chr14	100883036	100883037	cg11205335	-0.47918	5.64363e-08	1.77491e-07
chr14	100869060	100884783	hsa-miR-136/493	chr14	100882229	100882230	cg13555689	-0.497804	1.99278e-13	1.39619e-12
chr14	100869060	100884783	hsa-miR-136/493	chr14	100880953	100880954	cg15516314	-0.533313	1.62153e-13	1.1537e-12
chr14	100869060	100884783	hsa-miR-136/493	chr14	100882976	100882977	cg18862502	-0.591395	1.30654e-11	6.82817e-11
chr14	100869060	100884783	hsa-miR-136/493	chr14	100884402	100884403	cg18947995	-0.706883	4.00602e-14	3.17425e-13
chr14	100869060	100884783	hsa-miR-136/493	chr14	100883399	100883400	cg19603885	-0.603751	4.05945e-17	6.08454e-16
chr14	100869060	100884783	hsa-miR-136/493	chr14	100875101	100875102	cg19945937	-0.574745	9.66918e-11	4.44425e-10
chr14	100869060	100884783	hsa-miR-136/493	chr14	100882814	100882815	cg21103400	-0.513669	2.11012e-09	8.03117e-09
chr14	100869060	100884783	hsa-miR-136/493	chr14	100880947	100880948	cg23546343	-0.584113	2.02488e-15	2.06198e-14
chr14	100869060	100884783	hsa-miR-136/493	chr14	100884357	100884358	cg23682215	-0.543175	4.43394e-11	2.14219e-10
chr14	100869060	100884783	hsa-miR-136/493	chr14	100882109	100882110	cg24721750	-0.435051	3.68408e-19	9.66946e-18
chr14	100869060	100884783	hsa-miR-136/493	chr14	100884394	100884395	cg26254637	-0.648533	3.83533e-13	2.55715e-12
chr5	149428918	149430733	hsa-miR-145/143	chr5	149429158	149429159	cg12675571	-0.785827	1.41327e-12	8.58875e-12
chr3	160404588	160404825	hsa-miR-16-2/15b	chr3	160404715	160404716	cg09100593	-0.519663	5.54608e-22	4.00859e-20
chr1	198858873	198859153	hsa-miR-181a-1/181b-1	chr1	198859120	198859121	cg00111333	-0.744127	4.93151e-20	1.70894e-18
chr1	198858873	198859153	hsa-miR-181a-1/181b-1	chr1	198858931	198858932	cg01092932	-0.771333	3.1398e-16	3.82287e-15
chr1	198858873	198859153	hsa-miR-181a-1/181b-1	chr1	198859114	198859115	cg16010809	-0.714285	1.31838e-20	5.53859e-19
chr1	198858873	198859153	hsa-miR-181a-1/181b-1	chr1	198858876	198858877	cg22821358	-0.793032	1.75914e-22	1.59806e-20
chr1	198858873	198859153	hsa-miR-181a-1/181b-1	chr1	198859028	198859029	cg25349643	-1.20005	1.09168e-22	1.09083e-20
chr1	198858873	198859153	hsa-miR-181a-1/181b-1	chr1	198859080	198859081	cg26160460	-0.724036	1.23175e-22	1.20082e-20
chr20	58817615	58818313	hsa-miR-298/296	chr20	58817829	58817830	cg13869899	-0.503218	6.61826e-16	7.49357e-15
chr20	58817615	58818313	hsa-miR-298/296	chr20	58817843	58817844	cg14977365	-0.72274	2.7726e-17	4.32931e-16
chr20	58817615	58818313	hsa-miR-298/296	chr20	58818222	58818223	cg25188071	-0.681554	4.5216e-18	8.68713e-17
chr15	88608107	88611924	hsa-miR-3529/1179	chr15	88610436	88610437	cg02054724	-0.970777	9.2218e-21	4.09934e-19
chr19	53787675	53788773	hsa-miR-373/371a	chr19	53788724	53788725	cg23072571	-0.66567	1.14322e-16	1.53936e-15
chr8	12719132	12727299	hsa-miR-3926-2/5692a-2	chr8	12726683	12726684	cg24921221	-1.48375	5.85182e-26	5.00489e-23
chr1	1167104	1169087	hsa-miR-429/200b	chr1	1168936	1168937	cg00152708	-0.678722	4.06338e-16	4.82389e-15
chr1	1167104	1169087	hsa-miR-429/200b	chr1	1168986	1168987	cg23651812	-0.585075	1.50029e-16	1.96359e-15
chr7	93482760	93484019	hsa-miR-489/653	chr7	93484002	93484003	cg03816029	-0.77717	1.36147e-18	3.02137e-17
chr7	93482760	93484019	hsa-miR-489/653	chr7	93483952	93483953	cg26749833	-0.754176	3.49142e-15	3.38861e-14
chr19	53666679	53706336	hsa-miR-526a-1/512-1	chr19	53693595	53693596	cg00047185	-0.544924	2.84078e-20	1.06545e-18
chr19	53666679	53706336	hsa-miR-526a-1/512-1	chr19	53697993	53697994	cg00054741	-0.697515	3.14249e-13	2.12714e-12
chr19	53666679	53706336	hsa-miR-526a-1/512-1	chr19	53668021	53668022	cg04274236	-0.791311	9.4676e-12	5.05437e-11
chr19	53666679	53706336	hsa-miR-526a-1/512-1	chr19	53686497	53686498	cg07071144	-0.584215	4.60113e-17	6.80282e-16
chr19	53666679	53706336	hsa-miR-526a-1/512-1	chr19	53705263	53705264	cg09404289	-0.798365	3.13757e-19	8.42444e-18
chr19	53666679	53706336	hsa-miR-526a-1/512-1	chr19	53686299	53686300	cg09796029	-0.746237	2.99128e-14	2.42868e-13
chr19	53666679	53706336	hsa-miR-526a-1/512-1	chr19	53678049	53678050	cg09926260	-0.888543	2.02445e-23	2.90138e-21
chr19	53666679	53706336	hsa-miR-526a-1/512-1	chr19	53689759	53689760	cg10753636	-0.88753	9.18849e-19	2.14099e-17
chr19	53666679	53706336	hsa-miR-526a-1/512-1	chr19	53679757	53679758	cg11179120	-0.739361	3.61227e-14	2.88722e-13
chr19	53666679	53706336	hsa-miR-526a-1/512-1	chr19	53695238	53695239	cg11412164	-0.585374	4.29996e-17	6.40423e-16
chr19	53666679	53706336	hsa-miR-526a-1/512-1	chr19	53698413	53698414	cg11880023	-0.589783	4.74688e-17	6.99969e-16
chr19	53666679	53706336	hsa-miR-526a-1/512-1	chr19	53684976	53684977	cg12247976	-0.563163	3.87021e-13	2.57879e-12
chr19	53666679	53706336	hsa-miR-526a-1/512-1	chr19	53684066	53684067	cg17109533	-0.557371	2.58782e-10	1.1183e-09
chr19	53666679	53706336	hsa-miR-526a-1/512-1	chr19	53701195	53701196	cg17857791	-0.840507	1.70735e-20	6.918e-19
chr19	53666679	53706336	hsa-miR-526a-1/512-1	chr19	53689638	53689639	cg18710710	-0.657079	8.6127e-17	1.19397e-15
chr19	53666679	53706336	hsa-miR-526a-1/512-1	chr19	53701149	53701150	cg19606290	-0.979708	9.65771e-21	4.25254e-19
chr19	53666679	53706336	hsa-miR-526a-1/512-1	chr19	53696669	53696670	cg21592803	-0.648645	2.26059e-20	8.78295e-19
chr19	53666679	53706336	hsa-miR-526a-1/512-1	chr19	53692893	53692894	cg23097843	-0.739269	1.5515e-18	3.38963e-17
chr19	53666679	53706336	hsa-miR-526a-1/512-1	chr19	53671352	53671353	cg24128045	-0.831533	1.15978e-22	1.14558e-20
chr19	53666679	53706336	hsa-miR-526a-1/512-1	chr19	53699965	53699966	cg25512249	-0.779078	1.69137e-19	4.94506e-18
chr19	53666679	53706336	hsa-miR-526a-1/512-1	chr19	53688452	53688453	cg26377653	-1.26001	2.66778e-20	1.01098e-18

## Sheet: LUAD
Chromosome	Start	End	Cluster	Chromosome	Start	End	CpG Site	Log2(Fold Change)	p-value	adj-pvalue
chr14	101022066	101043062	hsa-miR-1185-1/379	chr14	101023849	101023850	cg00175487	-0.658327	1.0012e-17	1.26991e-15
chr14	101022066	101043062	hsa-miR-1185-1/379	chr14	101023312	101023313	cg01132653	-0.527276	2.14608e-17	2.11241e-15
chr14	101022066	101043062	hsa-miR-1185-1/379	chr14	101027024	101027025	cg06961429	-0.653931	3.95915e-17	3.29225e-15
chr14	101022066	101043062	hsa-miR-1185-1/379	chr14	101039909	101039910	cg19757573	-0.734075	4.21527e-17	3.43242e-15
chr14	101022066	101043062	hsa-miR-1185-1/379	chr14	101024339	101024340	cg25562958	-0.664203	4.53896e-17	3.62154e-15
chr14	101022066	101043062	hsa-miR-1185-1/379	chr14	101033743	101033744	cg27074221	-0.573375	2.15571e-14	5.21588e-13
chr17	81125276	81133308	hsa-miR-1250/657	chr17	81125985	81125986	cg06807993	-0.760246	4.12653e-16	1.95322e-14
chr17	81125276	81133308	hsa-miR-1250/657	chr17	81125977	81125978	cg18637486	-0.510051	4.53191e-16	2.1063e-14
chr17	81125276	81133308	hsa-miR-1250/657	chr17	81125911	81125912	cg26766064	-0.720738	6.46995e-18	9.70474e-16
chr16	535316	543366	hsa-miR-3176/5587	chr16	535386	535387	cg05251814	-0.573066	3.51212e-17	3.00839e-15
chr19	53666679	53706336	hsa-miR-526a-1/512-1	chr19	53701149	53701150	cg19606290	-0.562299	8.41021e-18	1.14091e-15

[truncated: 5 more sheets: LUSC, PAAD, PRAD, THCA, UCEC]
